# Supplementary material for: Competition for the conserved branch point sequence influences physiological outcomes in pre-mRNA splicing
Source: bioRxiv preprint, doi:10.1101/2024.10.09.617384, version 2 (2025-10-08)
Supplement: Suppl Table S1 [file 617384_file03.xlsx]

## Sheet: Sheet1
GENE	EVENT	shQKI_INCL-Level	shNT_INCL-Level	shQKI_shNT_E[dPsi]	shQKI_shNT_MV[dPsi]_at_0.95	shSF1_INCL-Level	shNT_INCL-Level	shSF1_shNT_E[dPsi]	shSF1_shNT_MV[dPsi]_at_0.95
A1CF	HsaALTA0000001-1/2	0.46842	0.465881	0.00254	0	0.40533	0.04241	0.36292	0.24
A1CF	HsaALTA0000001-2/2	0.527593	0.538842	-0.011249	0	0.597575	0.956372	-0.358797	0.36
A2M	HsaALTA0000003-1/2	0.82881	0.804772	0.024039	0.01	NA	NA	NA	NA
A2M	HsaALTA0000003-2/2	0.168577	0.17943	-0.010853	0	NA	NA	NA	NA
A2M	HsaALTA0000005-1/3	0.000323	0.000359	-3.6e-05	0	0.002539	0.001916	0.000623	0
A2M	HsaALTA0000005-2/3	0.00013	0.000146	-1.7e-05	0	0.001142	0.000618	0.000524	0
A2M	HsaALTA0000005-3/3	0.999677	0.999554	0.000123	0	0.996891	0.998042	-0.001151	0
A2M	HsaALTA0000006-1/3	0.000273	0.000142	0.000131	0	0.00055	0.000189	0.000361	0
A2M	HsaALTA0000006-2/3	0.001019	0.000763	0.000257	0	0.002606	0.000354	0.002252	0
A2M	HsaALTA0000006-3/3	0.998802	0.999155	-0.000353	0	0.996909	0.999669	-0.00276	0
A2M	HsaALTA0000007-1/2	0.02976	0.042763	-0.013003	0	0.090984	0.045879	0.045105	0
A2M	HsaALTA0000007-2/2	0.968394	0.958345	0.010049	0	0.900599	0.955404	-0.054805	0
NCEH1	HsaALTA0000010-1/2	0.013554	0.038104	-0.024551	0	NA	NA	NA	NA
NCEH1	HsaALTA0000010-2/2	0.986904	0.960585	0.026319	0	NA	NA	NA	NA
AAMP	HsaALTA0000012-1/3	0.893711	0.906368	-0.012656	0	0.840137	0.871154	-0.031018	0
AAMP	HsaALTA0000012-2/3	0.107901	0.093214	0.014688	0	0.159546	0.1292	0.030346	0
AAMP	HsaALTA0000012-3/3	0.001458	0.00127	0.000187	0	0.001181	0.000743	0.000438	0
AAMP	HsaALTA0000014-1/3	0.002058	0.003177	-0.001118	0	0.002391	0.00793	-0.005539	0
AAMP	HsaALTA0000014-2/3	0.997919	0.996741	0.001177	0	0.99754	0.991025	0.006515	0
AAMP	HsaALTA0000014-3/3	0.001959	0.001811	0.000148	0	0.002606	0.00746	-0.004854	0
AARS	HsaALTA0000015-1/3	0.013036	0.010822	0.002215	0	0.01129	0.018486	-0.007195	0
AARS	HsaALTA0000015-2/3	0.986786	0.990264	-0.003478	0	0.988282	0.982239	0.006043	0
AARS	HsaALTA0000015-3/3	0.002408	0.004836	-0.002427	0	0.002639	0.003328	-0.00069	0
AARS	HsaALTA0000016-1/2	0.002547	0.004247	-0.0017	0	0.0038	0.007962	-0.004162	0
AARS	HsaALTA0000016-2/2	0.997469	0.995393	0.002075	0	0.995993	0.992124	0.003869	0
AARS	HsaALTA0000017-1/3	0.002144	0.003367	-0.001223	0	0.00542	0.019514	-0.014094	0
AARS	HsaALTA0000017-2/3	0.997761	0.996901	0.00086	0	0.99463	0.980564	0.014066	0
AARS	HsaALTA0000017-3/3	0.002053	0.003481	-0.001428	0	0.005648	0.01142	-0.005772	0
AASS	HsaALTA0000021-1/2	0.022685	0.039479	-0.016794	0	NA	NA	NA	NA
AASS	HsaALTA0000021-2/2	0.977332	0.960391	0.016941	0	NA	NA	NA	NA
ABCA2	HsaALTA0000023-1/2	0.082056	0.056313	0.025744	0	NA	NA	NA	NA
ABCA2	HsaALTA0000023-2/2	0.925188	0.941756	-0.016568	0	NA	NA	NA	NA
ABCA2	HsaALTA0000024-1/2	0.048522	0.061215	-0.012693	0	NA	NA	NA	NA
ABCA2	HsaALTA0000024-2/2	0.948817	0.939774	0.009043	0	NA	NA	NA	NA
ABCA2	HsaALTA0000025-1/3	0.048092	0.048951	-0.00086	0	NA	NA	NA	NA
ABCA2	HsaALTA0000025-2/3	0.046124	0.079624	-0.0335	0	NA	NA	NA	NA
ABCA2	HsaALTA0000025-3/3	0.952362	0.923597	0.028765	0	NA	NA	NA	NA
ABCA2	HsaALTA0000026-1/2	0.924518	0.942672	-0.018154	0	NA	NA	NA	NA
ABCA2	HsaALTA0000026-2/2	0.080227	0.049421	0.030807	0	NA	NA	NA	NA
ABCA2	HsaALTA0000027-1/3	0.035445	0.037811	-0.002366	0	NA	NA	NA	NA
ABCA2	HsaALTA0000027-2/3	0.037464	0.039693	-0.002228	0	NA	NA	NA	NA
ABCA2	HsaALTA0000027-3/3	0.964146	0.96231	0.001836	0	NA	NA	NA	NA
ABCA2	HsaALTA0000028-1/5	0.020433	0.026493	-0.00606	0	0.039013	0.042369	-0.003357	0
ABCA2	HsaALTA0000028-2/5	0.02194	0.025463	-0.003523	0	0.039585	0.040503	-0.000918	0
ABCA2	HsaALTA0000028-3/5	0.021757	0.02758	-0.005823	0	0.039532	0.043386	-0.003854	0
ABCA2	HsaALTA0000028-4/5	0.978381	0.95557	0.022812	0	0.960632	0.956526	0.004106	0
ABCA2	HsaALTA0000028-5/5	0.020548	0.043151	-0.022603	0	0.036681	0.045215	-0.008534	0
ABCA7	HsaALTA0000031-1/2	0.094816	0.047103	0.047713	0	NA	NA	NA	NA
ABCA7	HsaALTA0000031-2/2	0.910206	0.94459	-0.034384	0.03	NA	NA	NA	NA
ABCA7	HsaALTA0000032-1/5	0.02043	0.021442	-0.001012	0	0.059472	0.043622	0.015851	0
ABCA7	HsaALTA0000032-2/5	0.021726	0.021111	0.000615	0	0.055279	0.075374	-0.020096	0
ABCA7	HsaALTA0000032-3/5	0.978301	0.980206	-0.001905	0	0.943438	0.932033	0.011404	0
ABCA7	HsaALTA0000032-4/5	0.022164	0.02201	0.000153	0	0.056353	0.044001	0.012352	0
ABCA7	HsaALTA0000032-5/5	0.02229	0.021885	0.000405	0	0.056609	0.04472	0.011889	0
ABCA7	HsaALTA0000033-1/3	0.025895	0.00828	0.017615	0	0.011848	0.008517	0.003331	0
ABCA7	HsaALTA0000033-2/3	0.973578	0.984951	-0.011373	0	0.989701	0.990522	-0.000821	0
ABCA7	HsaALTA0000033-3/3	0.01064	0.014118	-0.003478	0	0.011099	0.009695	0.001404	0
ABCB4	HsaALTA0000036-1/2	0.757335	0.739882	0.017453	0	0.551144	0.707604	-0.15646	0.15
ABCB4	HsaALTA0000036-2/2	0.237495	0.258462	-0.020967	0	0.433679	0.293521	0.140158	0
ABCB6	HsaALTA0000038-1/3	0.006444	0.004171	0.002272	0	0.003394	0.004103	-0.000709	0
ABCB6	HsaALTA0000038-2/3	0.974235	0.986667	-0.012432	0	0.971768	0.973007	-0.001239	0
ABCB6	HsaALTA0000038-3/3	0.022804	0.011312	0.011493	0	0.026155	0.026074	8.1e-05	0
ABCB7	HsaALTA0000039-1/2	0.504986	0.571009	-0.066023	0	0.415712	0.470746	-0.055035	0
ABCB7	HsaALTA0000039-2/2	0.497313	0.436713	0.0606	0	0.582317	0.525349	0.056967	0
ABCC10	HsaALTA0000042-1/3	0.964195	0.956806	0.007389	0	NA	NA	NA	NA
ABCC10	HsaALTA0000042-2/3	0.022552	0.027121	-0.004569	0	NA	NA	NA	NA
ABCC10	HsaALTA0000042-3/3	0.038111	0.043485	-0.005373	0	NA	NA	NA	NA
ABCC2	HsaALTA0000043-1/2	0.077724	0.060881	0.016842	0	0.089839	0.101167	-0.011328	0
ABCC2	HsaALTA0000043-2/2	0.922027	0.938291	-0.016264	0	0.911554	0.894401	0.017152	0
ABCC2	HsaALTA0000044-1/2	0.410394	0.407384	0.00301	0	0.44026	0.393842	0.046418	0
ABCC2	HsaALTA0000044-2/2	0.591744	0.59271	-0.000966	0	0.560541	0.608121	-0.04758	0
ABCC3	HsaALTA0000046-1/2	0.869209	0.817065	0.052144	0	NA	NA	NA	NA
ABCC3	HsaALTA0000046-2/2	0.133317	0.177845	-0.044528	0	NA	NA	NA	NA
ABCC3	HsaALTA0000047-1/4	0.047376	0.069719	-0.022344	0	0.094366	0.080067	0.014299	0
ABCC3	HsaALTA0000047-2/4	0.045158	0.024832	0.020327	0	0.057222	0.027102	0.03012	0
ABCC3	HsaALTA0000047-3/4	0.932597	0.926547	0.006049	0	0.862052	0.918719	-0.056666	0
ABCC3	HsaALTA0000047-4/4	0.026259	0.025311	0.000947	0	0.014872	0.028754	-0.013881	0
ABCC3	HsaALTA0000048-1/2	0.049403	0.045272	0.004131	0	NA	NA	NA	NA
ABCC3	HsaALTA0000048-2/2	0.953986	0.953779	0.000207	0	NA	NA	NA	NA
ABCC5	HsaALTA0000049-1/3	0.043105	0.052947	-0.009842	0	0.032591	0.024746	0.007846	0
ABCC5	HsaALTA0000049-2/3	0.931664	0.947289	-0.015626	0	0.969104	0.975827	-0.006723	0
ABCC5	HsaALTA0000049-3/3	0.069459	0.05445	0.015009	0	0.029339	0.030032	-0.000693	0
ABCD4	HsaALTA0000052-1/2	0.029915	0.017012	0.012902	0	0.01502	0.027499	-0.012478	0
ABCD4	HsaALTA0000052-2/2	0.972359	0.982986	-0.010627	0	0.985174	0.971536	0.013637	0
ABCE1	HsaALTA0000053-1/2	0.097754	0.06825	0.029505	0	0.052564	0.037719	0.014845	0
ABCE1	HsaALTA0000053-2/2	0.892657	0.932345	-0.039687	0	0.951877	0.963204	-0.011327	0
ABCF1	HsaALTA0000054-1/3	0.006669	0.007913	-0.001244	0	0.005149	0.003459	0.00169	0
ABCF1	HsaALTA0000054-2/3	0.493228	0.478981	0.014247	0	0.434414	0.461909	-0.027495	0
ABCF1	HsaALTA0000054-3/3	0.504423	0.525777	-0.021354	0	0.564545	0.53773	0.026814	0
ABCF1	HsaALTA0000055-1/3	0.010701	0.014594	-0.003894	0	0.015177	0.011148	0.004029	0
ABCF1	HsaALTA0000055-2/3	0.010675	0.014323	-0.003648	0	0.016879	0.010002	0.006877	0
ABCF1	HsaALTA0000055-3/3	0.988573	0.98702	0.001553	0	0.983871	0.988706	-0.004836	0
ABCF2	HsaALTA0000056-1/3	0.015823	0.018963	-0.00314	0	0.012485	0.022377	-0.009892	0
ABCF2	HsaALTA0000056-2/3	0.980343	0.974028	0.006315	0	0.98615	0.979795	0.006355	0
ABCF2	HsaALTA0000056-3/3	0.02031	0.024292	-0.003982	0	0.013851	0.020808	-0.006957	0
ABCF3	HsaALTA0000057-1/3	0.939656	0.980246	-0.040591	0	0.972983	0.979932	-0.006949	0
ABCF3	HsaALTA0000057-2/3	0.059151	0.018173	0.040978	0	0.028992	0.022026	0.006966	0
ABCF3	HsaALTA0000057-3/3	0.019069	0.021065	-0.001996	0	0.016621	0.020275	-0.003654	0
ABCG2	HsaALTA0000059-1/2	0.044819	0.031444	0.013375	0	NA	NA	NA	NA
ABCG2	HsaALTA0000059-2/2	0.956413	0.966046	-0.009633	0.01	NA	NA	NA	NA
ABCG5	HsaALTA0000060-1/2	0.980686	0.959709	0.020977	0	0.975857	0.947052	0.028805	0
ABCG5	HsaALTA0000060-2/2	0.018038	0.038695	-0.020657	0	0.023531	0.060984	-0.037453	0
ABCG8	HsaALTA0000061-1/2	0.179193	0.186677	-0.007484	0	0.133251	0.194107	-0.060856	0
ABCG8	HsaALTA0000061-2/2	0.827733	0.815615	0.012118	0	0.862094	0.821398	0.040696	0
ABHD11	HsaALTA0000064-3/3	0.071188	0.034914	0.036273	0	NA	NA	NA	NA
ABHD11	HsaALTA0000066-1/2	0.04411	0.036944	0.007166	0	NA	NA	NA	NA
ABHD11	HsaALTA0000066-2/2	0.955089	0.964202	-0.009112	0	NA	NA	NA	NA
ABHD5	HsaALTA0000069-1/4	0.032576	0.051683	-0.019107	0	NA	NA	NA	NA
ABHD5	HsaALTA0000069-2/4	0.966341	0.945106	0.021235	0	NA	NA	NA	NA
ABHD5	HsaALTA0000069-3/4	0.034114	0.059917	-0.025803	0	NA	NA	NA	NA
ABHD5	HsaALTA0000069-4/4	0.031435	0.055832	-0.024397	0	NA	NA	NA	NA
ABI1	HsaALTA0000070-1/2	0.281097	0.256008	0.025089	0	0.251513	0.144873	0.10664	0
ABI1	HsaALTA0000070-2/2	0.718908	0.745435	-0.026527	0	0.748487	0.85556	-0.107073	0
ABI2	HsaALTA0000071-1/3	0.006285	0.007101	-0.000815	0	0.00548	0.010085	-0.004605	0
ABI2	HsaALTA0000071-2/3	0.05038	0.046221	0.004159	0	0.0554	0.04558	0.00982	0
ABI2	HsaALTA0000071-3/3	0.948363	0.955453	-0.00709	0	0.942059	0.957123	-0.015064	0
ABLIM1	HsaALTA0000074-1/4	0.43406	0.363579	0.070481	0	0.572553	0.337318	0.235235	0.11
ABLIM1	HsaALTA0000074-2/4	0.563304	0.637634	-0.07433	0	0.42396	0.663867	-0.239907	0.11
ABLIM1	HsaALTA0000074-3/4	0.008443	0.014503	-0.00606	0	0.008116	0.010068	-0.001952	0
ABLIM1	HsaALTA0000074-4/4	0.008393	0.013175	-0.004781	0	0.004341	0.009603	-0.005263	0
ABTB1	HsaALTA0000079-1/2	0.90622	0.813897	0.092322	0	NA	NA	NA	NA
ABTB1	HsaALTA0000079-2/2	0.091926	0.19023	-0.098305	0	NA	NA	NA	NA
LGALSL	HsaALTA0000088-1/3	0.015475	0.018147	-0.002672	0	0.035869	0.034641	0.001228	0
LGALSL	HsaALTA0000088-2/3	0.974408	0.982707	-0.008299	0	0.967356	0.96541	0.001946	0
LGALSL	HsaALTA0000088-3/3	0.025308	0.017723	0.007585	0	0.033488	0.036161	-0.002673	0
RPS11	HsaALTA0000092-1/2	0.99248	0.994814	-0.002334	0	0.978917	0.951614	0.027303	0
RPS11	HsaALTA0000092-2/2	0.007243	0.00552	0.001723	0	0.022058	0.049638	-0.02758	0
CTB-50L17.10	HsaALTA0000094-1/2	0.349001	0.320095	0.028906	0	0.289899	0.365082	-0.075183	0.08
CTB-50L17.10	HsaALTA0000094-2/2	0.656097	0.678032	-0.021935	0	0.716261	0.628516	0.087745	0
PLPPR2	HsaALTA0000098-1/3	0.087425	0.216866	-0.129441	0.13	NA	NA	NA	NA
PLPPR2	HsaALTA0000098-2/3	0.914287	0.782866	0.131421	0	NA	NA	NA	NA
PLPPR2	HsaALTA0000098-3/3	0.049866	0.055468	-0.005602	0	NA	NA	NA	NA
MROH1	HsaALTA0000121-1/4	0.055667	0.042269	0.013398	0	NA	NA	NA	NA
MROH1	HsaALTA0000121-2/4	0.032571	0.04163	-0.009059	0	NA	NA	NA	NA
MROH1	HsaALTA0000121-3/4	0.058654	0.043146	0.015508	0	NA	NA	NA	NA
MROH1	HsaALTA0000121-4/4	0.914922	0.959329	-0.044408	0	NA	NA	NA	NA
LRP1	HsaALTA0000124-1/2	0.009062	0.014595	-0.005533	0	0.031075	0.039598	-0.008523	0
LRP1	HsaALTA0000124-2/2	0.98939	0.98778	0.001611	0	0.970284	0.958732	0.011552	0
LRP1	HsaALTA0000125-1/2	0.003773	0.005935	-0.002162	0	0.020902	0.035357	-0.014455	0
LRP1	HsaALTA0000125-2/2	0.996145	0.99418	0.001965	0	0.97902	0.962923	0.016097	0
LRP1	HsaALTA0000126-1/3	0.003883	0.006759	-0.002876	0	0.015659	0.0073	0.008359	0
LRP1	HsaALTA0000126-2/3	0.0039	0.006206	-0.002306	0	0.005351	0.008008	-0.002657	0
LRP1	HsaALTA0000126-3/3	0.996367	0.993986	0.002381	0	0.984192	0.99207	-0.007878	0
LRP1	HsaALTA0000127-1/3	0.019851	0.01259	0.00726	0	0.038193	0.048448	-0.010255	0
LRP1	HsaALTA0000127-2/3	0.006531	0.012475	-0.005943	0	0.008086	0.046873	-0.038786	0
LRP1	HsaALTA0000127-3/3	0.980349	0.988291	-0.007943	0	0.961424	0.955881	0.005543	0
LRP1	HsaALTA0000128-1/4	0.004645	0.009063	-0.004418	0	0.04655	0.041069	0.005481	0
LRP1	HsaALTA0000128-2/4	0.004715	0.008688	-0.003973	0	0.041886	0.043267	-0.001381	0
LRP1	HsaALTA0000128-3/4	0.995107	0.992142	0.002964	0	0.957374	0.951614	0.00576	0
LRP1	HsaALTA0000128-4/4	0.004426	0.008417	-0.003991	0	0.042398	0.046955	-0.004557	0
LRP1	HsaALTA0000129-1/2	0.002327	0.003675	-0.001348	0	0.00557	0.00652	-0.00095	0
LRP1	HsaALTA0000129-2/2	0.997712	0.996544	0.001168	0	0.994458	0.992661	0.001797	0
LRP1	HsaALTA0000130-1/2	0.003546	0.005453	-0.001907	0	0.006383	0.011093	-0.00471	0
LRP1	HsaALTA0000130-2/2	0.996756	0.994709	0.002047	0	0.9931	0.988966	0.004135	0
ACAA1	HsaALTA0000132-1/2	0.998556	0.998513	4.3e-05	0	0.998219	0.998255	-3.6e-05	0
ACAA1	HsaALTA0000132-2/2	0.001577	0.001505	7.2e-05	0	0.001674	0.001656	1.8e-05	0
ACAA1	HsaALTA0000133-1/3	0.938494	0.948021	-0.009527	0	0.837587	0.931824	-0.094236	0.09
ACAA1	HsaALTA0000133-3/3	0.061757	0.051438	0.010319	0	0.165341	0.066656	0.098685	0
ACAD10	HsaALTA0000135-1/2	0.887599	0.921357	-0.033758	0	NA	NA	NA	NA
ACAD10	HsaALTA0000135-2/2	0.115599	0.074553	0.041046	0	NA	NA	NA	NA
ACAD9	HsaALTA0000137-1/3	0.042303	0.044244	-0.001941	0	0.166488	0.053599	0.112889	0
ACAD9	HsaALTA0000137-2/3	0.068161	0.041644	0.026517	0	0.048244	0.05464	-0.006396	0
ACAD9	HsaALTA0000137-3/3	0.929948	0.956247	-0.026299	0	0.834767	0.950621	-0.115854	0.11
ACADM	HsaALTA0000138-1/2	0.980953	0.975524	0.005429	0	0.971697	0.966076	0.005621	0
ACADM	HsaALTA0000138-2/2	0.020205	0.023754	-0.003549	0	0.027879	0.033487	-0.005608	0
ACADM	HsaALTA0000139-1/2	0.004998	0.004886	0.000112	0	0.009313	0.010427	-0.001114	0
ACADM	HsaALTA0000139-2/2	0.995164	0.994406	0.000758	0	0.991382	0.990779	0.000603	0
ACADVL	HsaALTA0000140-1/8	0.008108	0.007399	0.000709	0	0.015032	0.016313	-0.001281	0
ACADVL	HsaALTA0000140-2/8	0.56765	0.641554	-0.073904	0	0.406356	0.573691	-0.167336	0.17
ACADVL	HsaALTA0000140-3/8	0.434956	0.36189	0.073066	0	0.597501	0.420737	0.176764	0.01
ACADVL	HsaALTA0000140-4/8	0.008329	0.007678	0.000651	0	0.015753	0.014606	0.001147	0
ACADVL	HsaALTA0000140-5/8	0.007548	0.007329	0.000219	0	0.013689	0.015332	-0.001642	0
ACADVL	HsaALTA0000140-6/8	0.008828	0.007236	0.001593	0	0.014771	0.019796	-0.005025	0
ACADVL	HsaALTA0000140-7/8	0.007741	0.007666	7.5e-05	0	0.014336	0.014746	-0.00041	0
ACADVL	HsaALTA0000140-8/8	0.00797	0.007324	0.000646	0	0.014606	0.015156	-0.00055	0
ACADVL	HsaALTA0000142-1/2	0.07352	0.015786	0.057733	0.02	0.069506	0.116012	-0.046506	0
ACADVL	HsaALTA0000142-2/2	0.925559	0.983817	-0.058258	0.01	0.928697	0.889749	0.038947	0
ACAP2	HsaALTA0000144-1/2	0.036746	0.037702	-0.000955	0	0.050685	0.049934	0.000751	0
ACAP2	HsaALTA0000144-2/2	0.966337	0.960822	0.005515	0	0.953629	0.947608	0.00602	0
ACAP3	HsaALTA0000145-1/4	0.900843	0.887069	0.013774	0	0.989719	0.980249	0.00947	0
ACAP3	HsaALTA0000145-2/4	0.023625	0.038845	-0.01522	0	0.006884	0.008957	-0.002073	0
ACAP3	HsaALTA0000145-3/4	0.044328	0.040733	0.003595	0	0.005831	0.013566	-0.007735	0
ACAP3	HsaALTA0000145-4/4	0.055089	0.051162	0.003927	0	0.010645	0.015119	-0.004474	0
ACAP3	HsaALTA0000146-1/2	0.029974	0.011096	0.018878	0	0.030415	0.122943	-0.092529	0
ACAP3	HsaALTA0000146-2/2	0.970018	0.9889	-0.018882	0	0.967662	0.874363	0.093299	0
ACBD4	HsaALTA0000148-1/4	0.016755	0.046699	-0.029943	0	0.01499	0.053713	-0.038724	0
ACBD4	HsaALTA0000148-2/4	0.897098	0.903972	-0.006874	0	0.860004	0.896322	-0.036318	0
ACBD4	HsaALTA0000148-3/4	0.071463	0.042047	0.029417	0	0.09263	0.058564	0.034066	0
ACBD4	HsaALTA0000148-4/4	0.047393	0.058747	-0.011354	0	0.058884	0.05549	0.003394	0
ACBD4	HsaALTA0000150-1/2	0.423781	0.435902	-0.012121	0	NA	NA	NA	NA
ACBD4	HsaALTA0000150-2/2	0.57073	0.56411	0.00662	0	NA	NA	NA	NA
ACBD5	HsaALTA0000151-1/2	0.251318	0.39839	-0.147072	0	NA	NA	NA	NA
ACBD5	HsaALTA0000151-2/2	0.752915	0.600985	0.15193	0	NA	NA	NA	NA
ACD	HsaALTA0000154-1/2	0.038198	0.018037	0.020161	0	0.030532	0.045916	-0.015384	0
ACD	HsaALTA0000154-2/2	0.961488	0.9822	-0.020712	0	0.969748	0.956806	0.012943	0
ACIN1	HsaALTA0000159-1/3	0.211195	0.19481	0.016385	0	0.21968	0.21679	0.002891	0
ACIN1	HsaALTA0000159-2/3	0.784718	0.806262	-0.021545	0	0.779495	0.782703	-0.003208	0
ACIN1	HsaALTA0000159-3/3	0.004744	0.004087	0.000657	0	0.001757	0.003528	-0.001771	0
ACIN1	HsaALTA0000160-1/4	0.004837	0.004159	0.000678	0	0.008931	0.012328	-0.003398	0
ACIN1	HsaALTA0000160-2/4	0.004607	0.004652	-4.5e-05	0	0.006913	0.008995	-0.002081	0
ACIN1	HsaALTA0000160-3/4	0.141416	0.211344	-0.069929	0	0.192522	0.353696	-0.161174	0
ACIN1	HsaALTA0000160-4/4	0.859182	0.788544	0.070638	0	0.799437	0.647888	0.151549	0
ACOT9	HsaALTA0000163-1/2	0.021502	0.02468	-0.003178	0	0.022147	0.016797	0.00535	0
ACOT9	HsaALTA0000163-2/2	0.979059	0.974571	0.004488	0	0.978916	0.984112	-0.005197	0
ACOT9	HsaALTA0000164-1/2	0.033203	0.033349	-0.000146	0	0.027991	0.014484	0.013507	0
ACOT9	HsaALTA0000164-2/2	0.968095	0.965535	0.00256	0	0.974282	0.985363	-0.011081	0
ACOX2	HsaALTA0000165-1/2	0.981972	0.977658	0.004314	0	NA	NA	NA	NA
ACOX2	HsaALTA0000165-2/2	0.017974	0.021134	-0.00316	0	NA	NA	NA	NA
ACOX2	HsaALTA0000166-1/2	0.892839	0.965944	-0.073106	0	NA	NA	NA	NA
ACOX2	HsaALTA0000166-2/2	0.107881	0.035146	0.072734	0	NA	NA	NA	NA
ACSF2	HsaALTA0000169-1/4	0.006809	0.005004	0.001805	0	0.006045	0.055381	-0.049336	0
ACSF2	HsaALTA0000169-2/4	0.00743	0.008216	-0.000786	0	0.01106	0.02654	-0.015479	0
ACSF2	HsaALTA0000169-3/4	0.993411	0.99207	0.001341	0	0.990408	0.939456	0.050952	0
ACSF2	HsaALTA0000169-4/4	0.007292	0.004906	0.002386	0	0.005638	0.023618	-0.01798	0
ACSL1	HsaALTA0000171-1/2	0.037811	0.037925	-0.000114	0	0.014326	0.026024	-0.011698	0
ACSL1	HsaALTA0000171-2/2	0.961067	0.961906	-0.000839	0	0.984033	0.973652	0.010381	0
ACSL4	HsaALTA0000173-1/4	0.133039	0.208202	-0.075163	0.02	0.230909	0.255291	-0.024383	0
ACSL4	HsaALTA0000173-2/4	0.577182	0.7565	-0.179318	0.12	0.740807	0.738916	0.001891	0
ACSL4	HsaALTA0000173-3/4	0.112292	0.015279	0.097014	0.07	0.018641	0.007601	0.01104	0
ACSL4	HsaALTA0000173-4/4	0.175623	0.023562	0.152061	0.11	0.017087	0.001963	0.015124	0
ACTG1	HsaALTA0000180-1/2	0.002037	0.001253	0.000784	0	0.009995	0.021261	-0.011266	0
ACTG1	HsaALTA0000180-2/2	0.997894	0.998821	-0.000927	0	0.989638	0.979215	0.010423	0
ACTN1	HsaALTA0000183-1/3	0.983806	0.983383	0.000423	0	0.984868	0.98735	-0.002482	0
ACTN1	HsaALTA0000183-2/3	0.015491	0.016535	-0.001044	0	0.015253	0.013208	0.002045	0
ACTN1	HsaALTA0000183-3/3	0.002223	0.003193	-0.00097	0	0.00382	0.006399	-0.002579	0
ACTN1	HsaALTA0000184-1/2	0.008397	0.012942	-0.004544	0	0.009994	0.047785	-0.037791	0
ACTN1	HsaALTA0000184-2/2	0.99045	0.985582	0.004867	0	0.989626	0.954626	0.035	0
ACTN1	HsaALTA0000185-1/3	0.994276	0.995198	-0.000922	0	0.995874	0.990839	0.005035	0
ACTN1	HsaALTA0000185-2/3	0.003631	0.004175	-0.000544	0	0.004176	0.009314	-0.005139	0
ACTN1	HsaALTA0000185-3/3	0.005776	0.004214	0.001562	0	0.003795	0.008745	-0.00495	0
ACTN4	HsaALTA0000186-1/3	0.003017	0.002126	0.000891	0	0.000824	0.002115	-0.001291	0
ACTN4	HsaALTA0000186-2/3	0.997101	0.997817	-0.000716	0	0.999112	0.998153	0.000959	0
ACTN4	HsaALTA0000186-3/3	0.003034	0.002011	0.001023	0	0.000875	0.002007	-0.001132	0
ACTN4	HsaALTA0000187-1/3	0.005167	0.003755	0.001412	0	0.004843	0.013376	-0.008534	0
ACTN4	HsaALTA0000187-2/3	0.00699	0.004268	0.002722	0	0.010024	0.012579	-0.002555	0
ACTN4	HsaALTA0000187-3/3	0.993012	0.996251	-0.003239	0	0.990116	0.987301	0.002816	0
ACTN4	HsaALTA0000188-1/2	0.004009	0.002611	0.001398	0	0.004503	0.007213	-0.00271	0
ACTN4	HsaALTA0000188-2/2	0.995478	0.997478	-0.001999	0	0.995489	0.993013	0.002476	0
ACTR1A	HsaALTA0000189-1/2	0.992944	0.991452	0.001492	0	0.988882	0.986291	0.002591	0
ACTR1A	HsaALTA0000189-2/2	0.007194	0.008391	-0.001197	0	0.011299	0.013584	-0.002285	0
ACTR1B	HsaALTA0000190-1/4	0.004141	0.004478	-0.000337	0	0.016215	0.032276	-0.016061	0
ACTR1B	HsaALTA0000190-2/4	0.99594	0.994973	0.000967	0	0.984461	0.967696	0.016765	0
ACTR1B	HsaALTA0000190-3/4	0.004302	0.004578	-0.000276	0	0.017242	0.034147	-0.016905	0
ACTR1B	HsaALTA0000190-4/4	0.003981	0.004341	-0.00036	0	0.015969	0.034086	-0.018117	0
ACTR8	HsaALTA0000192-1/2	0.067898	0.064889	0.003009	0	0.043271	0.023663	0.019608	0
ACTR8	HsaALTA0000192-2/2	0.932412	0.939155	-0.006743	0	0.957945	0.975207	-0.017263	0
ACTR8	HsaALTA0000193-1/2	0.916065	0.92564	-0.009575	0	0.920828	0.751725	0.169103	0
ACTR8	HsaALTA0000193-2/2	0.085442	0.075463	0.009979	0	0.08828	0.252585	-0.164305	0.16
ACVR2A	HsaALTA0000194-1/2	0.033564	0.042435	-0.008871	0	NA	NA	NA	NA
ACVR2A	HsaALTA0000194-2/2	0.965568	0.955301	0.010267	0	NA	NA	NA	NA
ADAM10	HsaALTA0000198-1/2	0.005719	0.008334	-0.002615	0	0.008803	0.0261	-0.017298	0
ADAM10	HsaALTA0000198-2/2	0.993547	0.991725	0.001823	0	0.991245	0.97627	0.014975	0
ADAM10	HsaALTA0000199-1/2	0.014757	0.016727	-0.00197	0	0.032827	0.02206	0.010766	0
ADAM10	HsaALTA0000199-2/2	0.985465	0.982744	0.002722	0	0.967922	0.979112	-0.01119	0
ADAM15	HsaALTA0000202-1/3	0.869125	0.890766	-0.021641	0.01	NA	NA	NA	NA
ADAM15	HsaALTA0000202-2/3	0.085086	0.044686	0.0404	0	NA	NA	NA	NA
ADAM15	HsaALTA0000202-3/3	0.094485	0.112089	-0.017603	0.01	NA	NA	NA	NA
ADAM15	HsaALTA0000203-1/2	0.020157	0.011745	0.008412	0	NA	NA	NA	NA
ADAM15	HsaALTA0000203-2/2	0.980574	0.987939	-0.007365	0	NA	NA	NA	NA
ADAM15	HsaALTA0000205-1/3	0.966663	0.987123	-0.02046	0	0.944177	0.836584	0.107593	0
ADAM15	HsaALTA0000205-2/3	0.031086	0.013265	0.017821	0	0.055965	0.158186	-0.10222	0.1
ADAM15	HsaALTA0000205-3/3	0.020937	0.014535	0.006402	0	0.02457	0.032393	-0.007823	0
ADAM15	HsaALTA0000206-1/2	0.023964	0.017211	0.006753	0	0.016121	0.039526	-0.023405	0
ADAM15	HsaALTA0000206-2/2	0.975089	0.984047	-0.008959	0	0.981824	0.960288	0.021535	0
ADAM17	HsaALTA0000207-1/5	0.02261	0.021733	0.000877	0	0.030531	0.065093	-0.034562	0.03
ADAM17	HsaALTA0000207-2/5	0.022753	0.024046	-0.001294	0	0.028778	0.054341	-0.025564	0.02
ADAM17	HsaALTA0000207-3/5	0.024693	0.022243	0.00245	0	0.029262	0.064587	-0.035326	0.03
ADAM17	HsaALTA0000207-4/5	0.021165	0.022687	-0.001522	0	0.032934	0.06047	-0.027536	0.02
ADAM17	HsaALTA0000207-5/5	0.97844	0.974886	0.003555	0	0.972172	0.946918	0.025254	0
ADAM9	HsaALTA0000213-1/2	0.01138	0.010896	0.000484	0	0.006005	0.002942	0.003064	0
ADAM9	HsaALTA0000213-2/2	0.988644	0.989213	-0.000569	0	0.994004	0.997376	-0.003372	0
ADAM9	HsaALTA0000214-1/2	0.003867	0.004492	-0.000625	0	0.006341	0.007239	-0.000898	0
ADAM9	HsaALTA0000214-2/2	0.99524	0.995554	-0.000315	0	0.993355	0.992419	0.000936	0
ADAM9	HsaALTA0000216-1/4	0.005477	0.00716	-0.001684	0	0.008707	0.007027	0.001681	0
ADAM9	HsaALTA0000216-2/4	0.005626	0.006643	-0.001017	0	0.008699	0.00692	0.001779	0
ADAM9	HsaALTA0000216-3/4	0.005559	0.006495	-0.000936	0	0.008227	0.007469	0.000758	0
ADAM9	HsaALTA0000216-4/4	0.99363	0.992921	0.000709	0	0.990303	0.992532	-0.00223	0
ADCY6	HsaALTA0000241-1/2	0.021961	0.038421	-0.01646	0	NA	NA	NA	NA
ADCY6	HsaALTA0000241-2/2	0.97735	0.959593	0.017757	0	NA	NA	NA	NA
ADH4	HsaALTA0000247-1/7	0.030448	0.04788	-0.017432	0	NA	NA	NA	NA
ADH4	HsaALTA0000247-2/7	0.031357	0.046909	-0.015553	0	NA	NA	NA	NA
ADH4	HsaALTA0000247-3/7	0.031217	0.077188	-0.045971	0	NA	NA	NA	NA
ADH4	HsaALTA0000247-4/7	0.029331	0.046793	-0.017461	0	NA	NA	NA	NA
ADH4	HsaALTA0000247-5/7	0.031141	0.04417	-0.013029	0	NA	NA	NA	NA
ADH4	HsaALTA0000247-6/7	0.96842	0.924213	0.044207	0	NA	NA	NA	NA
ADH4	HsaALTA0000247-7/7	0.032868	0.050074	-0.017205	0	NA	NA	NA	NA
ADIPOR1	HsaALTA0000248-1/2	0.006452	0.006428	2.3e-05	0	0.005874	0.008408	-0.002534	0
ADIPOR1	HsaALTA0000248-2/2	0.993737	0.99352	0.000216	0	0.994546	0.990951	0.003594	0
ADPGK	HsaALTA0000252-1/2	0.558415	0.557065	0.001349	0	NA	NA	NA	NA
ADPGK	HsaALTA0000252-2/2	0.441182	0.442786	-0.001605	0	NA	NA	NA	NA
GRK2	HsaALTA0000254-1/5	0.992542	0.991882	0.00066	0	0.963525	0.957449	0.006076	0
GRK2	HsaALTA0000254-2/5	0.008042	0.008432	-0.00039	0	0.03485	0.043588	-0.008738	0
GRK2	HsaALTA0000254-3/5	0.008544	0.007903	0.000641	0	0.034778	0.044165	-0.009387	0
GRK2	HsaALTA0000254-4/5	0.007713	0.008013	-0.000301	0	0.035713	0.044836	-0.009123	0
GRK2	HsaALTA0000254-5/5	0.008052	0.008578	-0.000526	0	0.035182	0.044181	-0.008999	0
GRK2	HsaALTA0000256-1/3	0.007055	0.009077	-0.002022	0	0.011334	0.017951	-0.006617	0
GRK2	HsaALTA0000256-2/3	0.044679	0.042128	0.002552	0	0.035093	0.063606	-0.028513	0
GRK2	HsaALTA0000256-3/3	0.954687	0.960159	-0.005472	0	0.96336	0.935436	0.027925	0
ADRM1	HsaALTA0000258-1/9	0.007869	0.009653	-0.001784	0	0.001963	0.008462	-0.006499	0
ADRM1	HsaALTA0000258-2/9	0.008598	0.010073	-0.001475	0	0.001865	0.008429	-0.006564	0
ADRM1	HsaALTA0000258-3/9	0.007492	0.009719	-0.002226	0	0.001936	0.008731	-0.006794	0
ADRM1	HsaALTA0000258-4/9	0.007514	0.010444	-0.002929	0	0.001922	0.008677	-0.006755	0
ADRM1	HsaALTA0000258-5/9	0.00761	0.010166	-0.002556	0	0.00192	0.008043	-0.006123	0
ADRM1	HsaALTA0000258-6/9	0.008311	0.015625	-0.007314	0	0.002132	0.008947	-0.006815	0
ADRM1	HsaALTA0000258-7/9	0.986019	0.976014	0.010005	0	0.9812	0.991841	-0.010641	0
ADRM1	HsaALTA0000258-8/9	0.013419	0.016641	-0.003222	0	0.017033	0.007676	0.009357	0
ADRM1	HsaALTA0000258-9/9	0.00787	0.009746	-0.001876	0	0.00326	0.008893	-0.005633	0
AES	HsaALTA0000263-1/6	0.002525	0.002341	0.000184	0	0.008485	0.013137	-0.004652	0
AES	HsaALTA0000263-2/6	0.002613	0.002085	0.000528	0	0.008949	0.013159	-0.004211	0
AES	HsaALTA0000263-3/6	0.994521	0.990595	0.003925	0	0.848304	0.927124	-0.07882	0
AES	HsaALTA0000263-4/6	0.005354	0.009256	-0.003902	0	0.118797	0.050957	0.06784	0
AES	HsaALTA0000263-5/6	0.00255	0.002305	0.000245	0	0.039801	0.038703	0.001099	0
AES	HsaALTA0000263-6/6	0.002407	0.002126	0.000281	0	0.008713	0.013016	-0.004304	0
AFF1	HsaALTA0000266-1/6	0.015858	0.022057	-0.006199	0	0.023245	0.02749	-0.004245	0
AFF1	HsaALTA0000266-2/6	0.016762	0.020583	-0.00382	0	0.023471	0.025045	-0.001574	0
AFF1	HsaALTA0000266-3/6	0.028696	0.035481	-0.006784	0	0.037306	0.024618	0.012689	0
AFF1	HsaALTA0000266-4/6	0.019036	0.021209	-0.002173	0	0.024369	0.024895	-0.000526	0
AFF1	HsaALTA0000266-5/6	0.028652	0.020609	0.008042	0	0.052777	0.023922	0.028856	0
AFF1	HsaALTA0000266-6/6	0.95695	0.966041	-0.009091	0	0.934168	0.977976	-0.043807	0.03
AFF1	HsaALTA0000267-1/2	0.290158	0.40704	-0.116882	0	0.432425	0.391335	0.041091	0
AFF1	HsaALTA0000267-2/2	0.702825	0.587913	0.114912	0	0.578832	0.615545	-0.036713	0
AFTPH	HsaALTA0000272-1/2	0.426891	0.389078	0.037813	0	0.409432	0.436871	-0.027439	0
AFTPH	HsaALTA0000272-2/2	0.570108	0.604794	-0.034686	0	0.601884	0.573784	0.0281	0
AGA	HsaALTA0000273-1/2	0.065051	0.037643	0.027408	0	0.039	0.068546	-0.029546	0
AGA	HsaALTA0000273-2/2	0.933717	0.962086	-0.028369	0	0.958513	0.929249	0.029264	0
AGAP3	HsaALTA0000274-1/2	0.977078	0.975216	0.001862	0	0.969529	0.942198	0.027331	0
AGAP3	HsaALTA0000274-2/2	0.020847	0.024245	-0.003398	0	0.031209	0.056103	-0.024894	0
AGER	HsaALTA0000277-1/2	0.968749	0.944203	0.024546	0	NA	NA	NA	NA
AGER	HsaALTA0000277-2/2	0.034351	0.056249	-0.021898	0	NA	NA	NA	NA
AGFG1	HsaALTA0000279-1/2	0.01902	0.010356	0.008663	0	NA	NA	NA	NA
AGFG1	HsaALTA0000279-2/2	0.980652	0.990534	-0.009882	0	NA	NA	NA	NA
AGFG1	HsaALTA0000280-1/2	0.2019	0.237591	-0.035692	0	0.181249	0.16407	0.017179	0
AGFG1	HsaALTA0000280-2/2	0.798288	0.766765	0.031524	0	0.821883	0.83829	-0.016408	0
AGK	HsaALTA0000281-1/2	0.033072	0.051862	-0.01879	0	0.040433	0.052227	-0.011794	0
AGK	HsaALTA0000281-2/2	0.964213	0.948348	0.015865	0	0.961591	0.944599	0.016992	0
AGPAT2	HsaALTA0000284-1/4	0.949439	0.986033	-0.036593	0	NA	NA	NA	NA
AGPAT2	HsaALTA0000284-2/4	0.051382	0.013437	0.037945	0	NA	NA	NA	NA
AGPAT2	HsaALTA0000284-3/4	0.049784	0.014067	0.035717	0	NA	NA	NA	NA
AGPAT2	HsaALTA0000284-4/4	0.048848	0.012566	0.036283	0	NA	NA	NA	NA
AGPAT3	HsaALTA0000286-1/2	0.980463	0.976451	0.004012	0	0.977397	0.949979	0.027417	0
AGPAT3	HsaALTA0000286-2/2	0.020479	0.02297	-0.002491	0	0.022447	0.048734	-0.026287	0
GPAT4	HsaALTA0000288-1/2	0.015672	0.014844	0.000828	0	0.025526	0.024709	0.000817	0
GPAT4	HsaALTA0000288-2/2	0.984139	0.984749	-0.000611	0	0.973396	0.977331	-0.003936	0
GPAT4	HsaALTA0000289-1/3	0.982294	0.9817	0.000593	0	0.977134	0.976007	0.001127	0
GPAT4	HsaALTA0000289-2/3	0.01697	0.010824	0.006146	0	0.016382	0.021662	-0.005279	0
GPAT4	HsaALTA0000289-3/3	0.01676	0.017838	-0.001078	0	0.015423	0.023039	-0.007616	0
AGPS	HsaALTA0000290-1/2	0.005052	0.009152	-0.0041	0	0.010534	0.012243	-0.001709	0
AGPS	HsaALTA0000290-2/2	0.995237	0.990763	0.004474	0	0.990708	0.988472	0.002236	0
AGRN	HsaALTA0000291-1/3	0.012125	0.018363	-0.006237	0	NA	NA	NA	NA
AGRN	HsaALTA0000291-2/3	0.009941	0.01884	-0.008899	0	NA	NA	NA	NA
AGRN	HsaALTA0000291-3/3	0.988803	0.980483	0.008319	0	NA	NA	NA	NA
PHYKPL	HsaALTA0000295-1/5	0.04341	0.07254	-0.02913	0	NA	NA	NA	NA
PHYKPL	HsaALTA0000295-2/5	0.133651	0.070219	0.063432	0	NA	NA	NA	NA
PHYKPL	HsaALTA0000295-3/5	0.748588	0.801105	-0.052517	0	NA	NA	NA	NA
PHYKPL	HsaALTA0000295-4/5	0.061294	0.055144	0.00615	0	NA	NA	NA	NA
PHYKPL	HsaALTA0000295-5/5	0.079525	0.07188	0.007645	0	NA	NA	NA	NA
AHCY	HsaALTA0000296-1/2	0.002252	0.001554	0.000698	0	0.00545	0.004647	0.000803	0
AHCY	HsaALTA0000296-2/2	0.997605	0.998395	-0.00079	0	0.994601	0.995057	-0.000457	0
AHCY	HsaALTA0000297-1/3	0.011934	0.010962	0.000973	0	0.002738	0.002548	0.00019	0
AHCY	HsaALTA0000297-2/3	0.988154	0.988899	-0.000745	0	0.997315	0.997145	0.00017	0
AHCY	HsaALTA0000297-3/3	0.000665	0.000422	0.000243	0	0.001702	0.002688	-0.000986	0
AHCY	HsaALTA0000298-1/4	0.00137	0.002059	-0.00069	0	0.002038	0.005812	-0.003774	0
AHCY	HsaALTA0000298-2/4	0.00151	0.001457	5.3e-05	0	0.001848	0.006182	-0.004334	0
AHCY	HsaALTA0000298-3/4	0.998622	0.998076	0.000547	0	0.997914	0.994218	0.003697	0
AHCY	HsaALTA0000298-4/4	0.001436	0.001466	-3e-05	0	0.0019	0.005922	-0.004022	0
AHCYL1	HsaALTA0000299-1/3	0.003719	0.008398	-0.004679	0	0.014208	0.035316	-0.021108	0
AHCYL1	HsaALTA0000299-2/3	0.996367	0.986666	0.0097	0	0.985577	0.962064	0.023513	0
AHCYL1	HsaALTA0000299-3/3	0.003447	0.012657	-0.009209	0	0.015715	0.040491	-0.024776	0
AHCYL1	HsaALTA0000300-1/4	0.006622	0.00634	0.000282	0	0.004426	0.007042	-0.002615	0
AHCYL1	HsaALTA0000300-2/4	0.993154	0.989536	0.003618	0	0.986981	0.993028	-0.006047	0
AHCYL1	HsaALTA0000300-3/4	0.002747	0.006313	-0.003566	0	0.010481	0.002241	0.00824	0
AHCYL1	HsaALTA0000300-4/4	0.002745	0.010637	-0.007892	0	0.002955	0.002315	0.00064	0
AHSA2	HsaALTA0000306-1/2	0.002556	0.006306	-0.00375	0	0.008021	0.011658	-0.003637	0
AHSA2	HsaALTA0000306-2/2	0.997181	0.993655	0.003526	0	0.992154	0.988995	0.003159	0
AHSA2	HsaALTA0000308-1/3	NA	NA	NA	NA	0.093885	0.055459	0.038427	0
AHSA2	HsaALTA0000308-2/3	NA	NA	NA	NA	0.899184	0.943546	-0.044362	0.04
AHSA2	HsaALTA0000308-3/3	NA	NA	NA	NA	0.059004	0.050089	0.008916	0
AHSG	HsaALTA0000309-1/3	0.997881	0.99782	6.1e-05	0	0.998266	0.997069	0.001197	0
AHSG	HsaALTA0000309-2/3	0.002115	0.002182	-6.7e-05	0	0.001816	0.003019	-0.001202	0
AHSG	HsaALTA0000309-3/3	6.1e-05	4e-05	2.1e-05	0	0.00026	0.000159	0.0001	0
AIP	HsaALTA0000314-1/3	0.007564	0.003949	0.003615	0	0.030647	0.042833	-0.012186	0
AIP	HsaALTA0000314-2/3	0.011988	0.009258	0.00273	0	0.063481	0.038453	0.025028	0
AIP	HsaALTA0000314-3/3	0.988563	0.99126	-0.002697	0	0.940067	0.960076	-0.020009	0
AK1	HsaALTA0000315-1/2	0.968782	0.958906	0.009876	0	0.950854	0.931886	0.018968	0
AK1	HsaALTA0000315-2/2	0.030781	0.040894	-0.010113	0	0.051866	0.073895	-0.02203	0
AKAP13	HsaALTA0000321-1/3	0.637317	0.728277	-0.090961	0	0.597294	0.544673	0.05262	0
AKAP13	HsaALTA0000321-2/3	0.334665	0.274405	0.060259	0	0.398429	0.41062	-0.012192	0.02
AKAP13	HsaALTA0000321-3/3	0.060989	0.053502	0.007487	0	0.038585	0.096942	-0.058357	0.05
AKAP9	HsaALTA0000324-1/2	0.014335	0.017245	-0.00291	0	0.02898	0.017793	0.011187	0
AKAP9	HsaALTA0000324-2/2	0.98541	0.982478	0.002932	0	0.970245	0.983608	-0.013363	0
AKNA	HsaALTA0000326-1/2	0.053541	0.055141	-0.0016	0	NA	NA	NA	NA
AKNA	HsaALTA0000326-2/2	0.947061	0.943464	0.003597	0	NA	NA	NA	NA
AKR1A1	HsaALTA0000328-1/2	0.008079	0.003465	0.004615	0	0.02856	0.020243	0.008317	0
AKR1A1	HsaALTA0000328-2/2	0.991946	0.996749	-0.004803	0	0.971331	0.977935	-0.006604	0
AKR1B1	HsaALTA0000330-1/3	0.00624	0.011383	-0.005143	0	0.004588	0.007469	-0.002881	0
AKR1B1	HsaALTA0000330-2/3	0.993751	0.98878	0.004971	0	0.995353	0.993552	0.0018	0
AKR1B1	HsaALTA0000330-3/3	0.006424	0.004957	0.001467	0	0.004772	0.006936	-0.002164	0
AKR1B1	HsaALTA0000331-1/2	0.96629	0.973022	-0.006733	0	NA	NA	NA	NA
AKR1B1	HsaALTA0000331-2/2	0.033509	0.026882	0.006627	0	NA	NA	NA	NA
AKT1	HsaALTA0000335-1/3	0.002745	0.002892	-0.000147	0	0.003718	0.004205	-0.000486	0
AKT1	HsaALTA0000335-2/3	0.002979	0.002982	-3e-06	0	0.003752	0.003768	-1.6e-05	0
AKT1	HsaALTA0000335-3/3	0.997049	0.996931	0.000118	0	0.996554	0.995912	0.000643	0
AKT2	HsaALTA0000338-1/5	0.959157	0.988568	-0.029411	0	0.989284	0.921408	0.067876	0
AKT2	HsaALTA0000338-2/5	0.008462	0.007033	0.001429	0	0.006294	0.034875	-0.028582	0
AKT2	HsaALTA0000338-3/5	0.008568	0.007036	0.001532	0	0.006171	0.036627	-0.030456	0
AKT2	HsaALTA0000338-4/5	0.043718	0.012254	0.031464	0	0.010927	0.07834	-0.067413	0
AKT2	HsaALTA0000338-5/5	0.009	0.006547	0.002452	0	0.006865	0.034505	-0.027641	0
AKT2	HsaALTA0000339-1/3	0.005266	0.007536	-0.00227	0	0.009912	0.005744	0.004167	0
AKT2	HsaALTA0000339-2/3	0.994069	0.991908	0.002161	0	0.989034	0.994572	-0.005538	0
AKT2	HsaALTA0000339-3/3	0.005879	0.004434	0.001445	0	0.002858	0.003206	-0.000347	0
AKTIP	HsaALTA0000342-1/2	0.313327	0.433064	-0.119737	0	0.44983	0.37091	0.07892	0
AKTIP	HsaALTA0000342-2/2	0.694548	0.56272	0.131828	0	0.550208	0.621424	-0.071216	0
CDC42BPB	HsaALTA0000343-1/3	0.016485	0.013501	0.002984	0	0.019248	0.031254	-0.012007	0
CDC42BPB	HsaALTA0000343-2/3	0.010633	0.013529	-0.002896	0	0.020754	0.101016	-0.080262	0
CDC42BPB	HsaALTA0000343-3/3	0.983154	0.98569	-0.002536	0	0.98056	0.907002	0.073558	0
CDC42BPB	HsaALTA0000344-1/3	0.007705	0.017022	-0.009317	0	0.003112	0.007552	-0.004441	0
CDC42BPB	HsaALTA0000344-2/3	0.991529	0.970937	0.020592	0	0.989784	0.973184	0.0166	0
CDC42BPB	HsaALTA0000344-3/3	0.008192	0.027649	-0.019457	0	0.010591	0.02355	-0.012959	0
ALAD	HsaALTA0000348-1/2	0.026266	0.023684	0.002582	0	0.034212	0.035519	-0.001307	0
ALAD	HsaALTA0000348-2/2	0.97424	0.975326	-0.001086	0	0.966732	0.966819	-8.7e-05	0
ALAD	HsaALTA0000349-1/2	0.873805	0.879858	-0.006053	0	0.66233	0.86751	-0.20518	0.02
ALAD	HsaALTA0000349-2/2	0.125154	0.121348	0.003806	0	0.335565	0.135629	0.199937	0
ALAS1	HsaALTA0000350-1/2	0.074576	0.139734	-0.065158	0	0.135387	0.187023	-0.051635	0
ALAS1	HsaALTA0000350-2/2	0.920444	0.86543	0.055014	0	0.863902	0.808994	0.054908	0
ALB	HsaALTA0000351-1/3	1.5e-05	5.1e-05	-3.6e-05	0	0.000231	0.000189	4.2e-05	0
ALB	HsaALTA0000351-2/3	0.999983	0.999945	3.9e-05	0	0.999766	0.999818	-5.1e-05	0
ALB	HsaALTA0000351-3/3	1.6e-05	8e-06	8e-06	0	9e-05	8.5e-05	5e-06	0
ALB	HsaALTA0000352-1/2	0.000108	0.000105	3e-06	0	0.000246	0.000299	-5.3e-05	0
ALB	HsaALTA0000352-2/2	0.999891	0.999893	-3e-06	0	0.99975	0.999697	5.3e-05	0
ALCAM	HsaALTA0000354-1/2	0.990171	0.992672	-0.002501	0	0.983405	0.974532	0.008873	0
ALCAM	HsaALTA0000354-2/2	0.009887	0.00711	0.002777	0	0.017337	0.023892	-0.006554	0
ALDH1A1	HsaALTA0000358-1/2	0.001743	0.002438	-0.000696	0	0.001758	0.004602	-0.002844	0
ALDH1A1	HsaALTA0000358-2/2	0.998259	0.997485	0.000774	0	0.998169	0.995207	0.002962	0
ALDH7A1	HsaALTA0000366-1/2	0.993749	0.996688	-0.00294	0	0.996999	0.993868	0.003131	0
ALDH7A1	HsaALTA0000366-2/2	0.006251	0.003399	0.002852	0	0.002879	0.005675	-0.002797	0
ALDH7A1	HsaALTA0000368-1/6	0.020833	0.012547	0.008286	0	0.029952	0.041	-0.011047	0
ALDH7A1	HsaALTA0000368-2/6	0.01293	0.01223	0.0007	0	0.029125	0.047082	-0.017956	0
ALDH7A1	HsaALTA0000368-3/6	0.013448	0.013637	-0.000189	0	0.030517	0.043251	-0.012734	0
ALDH7A1	HsaALTA0000368-4/6	0.978827	0.986609	-0.007781	0	0.962478	0.950787	0.011691	0
ALDH7A1	HsaALTA0000368-5/6	0.014866	0.013354	0.001512	0	0.037889	0.044634	-0.006745	0
ALDH7A1	HsaALTA0000368-6/6	0.014644	0.013599	0.001045	0	0.031365	0.043942	-0.012577	0
ALDOA	HsaALTA0000369-1/5	0.000195	0.000151	4.4e-05	0	0.000428	0.000394	3.4e-05	0
ALDOA	HsaALTA0000369-2/5	0.000334	0.000236	9.8e-05	0	0.000424	0.000409	1.5e-05	0
ALDOA	HsaALTA0000369-3/5	0.999562	0.999506	5.6e-05	0	0.999553	0.999605	-5.2e-05	0
ALDOA	HsaALTA0000369-4/5	0.000198	0.000133	6.5e-05	0	0.000447	0.000403	4.4e-05	0
ALDOA	HsaALTA0000369-5/5	0.000296	0.000437	-0.000142	0	0.000428	0.000396	3.3e-05	0
ALG12	HsaALTA0000370-1/2	0.016924	0.027633	-0.010709	0	0.019692	0.022101	-0.002409	0
ALG12	HsaALTA0000370-2/2	0.984317	0.973604	0.010713	0	0.978936	0.978185	0.000751	0
ALG12	HsaALTA0000371-1/2	0.035639	0.10757	-0.07193	0	NA	NA	NA	NA
ALG12	HsaALTA0000371-2/2	0.960908	0.891281	0.069627	0	NA	NA	NA	NA
ALG8	HsaALTA0000376-1/3	0.009966	0.00992	4.5e-05	0	0.021756	0.03433	-0.012573	0
ALG8	HsaALTA0000376-2/3	0.009442	0.009802	-0.000361	0	0.013408	0.036886	-0.023478	0
ALG8	HsaALTA0000376-3/3	0.990958	0.989525	0.001433	0	0.977724	0.963495	0.014229	0
ALKBH2	HsaALTA0000377-1/2	0.405059	0.465249	-0.06019	0	NA	NA	NA	NA
ALKBH2	HsaALTA0000377-2/2	0.59986	0.531825	0.068034	0	NA	NA	NA	NA
ALKBH2	HsaALTA0000378-1/2	0.032455	0.037365	-0.00491	0	0.046189	0.052387	-0.006198	0
ALKBH2	HsaALTA0000378-2/2	0.968121	0.960659	0.007461	0	0.958864	0.949606	0.009259	0
ALKBH3	HsaALTA0000379-1/2	0.04772	0.106271	-0.058551	0	NA	NA	NA	NA
ALKBH3	HsaALTA0000379-2/2	0.953204	0.897758	0.055446	0	NA	NA	NA	NA
TMEM237	HsaALTA0000394-1/2	0.982904	0.984814	-0.001911	0	0.969738	0.96463	0.005109	0
TMEM237	HsaALTA0000394-2/2	0.018303	0.016028	0.002275	0	0.032797	0.036179	-0.003382	0
TMEM237	HsaALTA0000395-1/2	0.027524	0.032975	-0.005451	0	0.010959	0.01052	0.000439	0
TMEM237	HsaALTA0000395-2/2	0.97471	0.969389	0.005321	0	0.9889	0.989469	-0.000569	0
AMACR	HsaALTA0000398-1/2	0.004374	0.029564	-0.02519	0	0.031654	0.077126	-0.045472	0
AMACR	HsaALTA0000398-2/2	0.994954	0.967559	0.027395	0	0.966485	0.925494	0.040992	0
AMBP	HsaALTA0000400-1/2	0.000183	8.7e-05	9.6e-05	0	0.000764	0.00238	-0.001616	0
AMBP	HsaALTA0000400-2/2	0.999813	0.999905	-9.3e-05	0	0.999281	0.997706	0.001575	0
AMOTL2	HsaALTA0000407-1/3	NA	NA	NA	NA	0.035182	0.035692	-0.00051	0
AMOTL2	HsaALTA0000407-2/3	NA	NA	NA	NA	0.023111	0.035603	-0.012492	0
AMOTL2	HsaALTA0000407-3/3	NA	NA	NA	NA	0.962886	0.964678	-0.001792	0
AMOTL2	HsaALTA0000408-1/4	NA	NA	NA	NA	0.039711	0.045497	-0.005786	0
AMOTL2	HsaALTA0000408-2/4	NA	NA	NA	NA	0.041028	0.052492	-0.011464	0.01
AMOTL2	HsaALTA0000408-3/4	NA	NA	NA	NA	0.269105	0.196647	0.072458	0
AMOTL2	HsaALTA0000408-4/4	NA	NA	NA	NA	0.739721	0.803912	-0.06419	0.07
AMPD2	HsaALTA0000410-1/2	0.019344	0.016306	0.003037	0	0.044034	0.029979	0.014055	0
AMPD2	HsaALTA0000410-2/2	0.979622	0.98323	-0.003608	0	0.958613	0.967916	-0.009303	0
ANAPC1	HsaALTA0000416-1/4	0.043563	0.02888	0.014683	0	0.160726	0.114257	0.046469	0
ANAPC1	HsaALTA0000416-2/4	0.01312	0.033917	-0.020797	0	0.043445	0.035924	0.007521	0
ANAPC1	HsaALTA0000416-3/4	0.939773	0.925787	0.013986	0	0.787584	0.828652	-0.041068	0
ANAPC1	HsaALTA0000416-4/4	0.012245	0.01666	-0.004416	0	0.020892	0.030929	-0.010036	0
ANAPC2	HsaALTA0000420-1/2	0.031511	0.031502	9e-06	0	0.047392	0.031173	0.016219	0
ANAPC2	HsaALTA0000420-2/2	0.968674	0.969196	-0.000522	0	0.954179	0.96822	-0.01404	0.01
ANAPC2	HsaALTA0000421-1/2	0.092376	0.034979	0.057397	0	0.084889	0.14447	-0.059581	0
ANAPC2	HsaALTA0000421-2/2	0.907333	0.965025	-0.057692	0	0.915164	0.862939	0.052225	0.05
ANAPC5	HsaALTA0000422-1/2	0.287715	0.285958	0.001756	0	0.219981	0.387156	-0.167175	0.04
ANAPC5	HsaALTA0000422-2/2	0.710127	0.715603	-0.005476	0	0.777461	0.612264	0.165197	0.05
ANAPC5	HsaALTA0000423-1/2	0.993483	0.994198	-0.000715	0	0.986628	0.966959	0.019669	0
ANAPC5	HsaALTA0000423-2/2	0.005842	0.005698	0.000143	0	0.012199	0.031236	-0.019038	0
ANAPC7	HsaALTA0000424-1/2	0.012615	0.015568	-0.002953	0	0.028775	0.046076	-0.017301	0.01
ANAPC7	HsaALTA0000424-2/2	0.986356	0.98269	0.003666	0	0.97458	0.956058	0.018523	0
ANKFY1	HsaALTA0000436-1/2	0.031874	0.045628	-0.013755	0	0.022694	0.054325	-0.031631	0
ANKFY1	HsaALTA0000436-2/2	0.968823	0.952445	0.016379	0	0.975469	0.946966	0.028503	0
ANKIB1	HsaALTA0000439-1/2	0.983674	0.971262	0.012411	0	0.986028	0.990449	-0.004421	0
ANKIB1	HsaALTA0000439-2/2	0.016725	0.026837	-0.010113	0	0.014499	0.009778	0.004721	0
ANKRD1	HsaALTA0000442-1/2	0.006255	0.036615	-0.03036	0	0.049932	0.061687	-0.011755	0
ANKRD1	HsaALTA0000442-2/2	0.994113	0.963537	0.030577	0	0.94612	0.946149	-2.9e-05	0
ANKRD12	HsaALTA0000448-1/3	0.037428	0.059315	-0.021887	0	0.035344	0.032079	0.003265	0
ANKRD12	HsaALTA0000448-2/3	0.034135	0.056993	-0.022858	0	0.034581	0.03063	0.00395	0
ANKRD12	HsaALTA0000448-3/3	0.963385	0.938323	0.025062	0	0.965117	0.967937	-0.00282	0
ANKRD13A	HsaALTA0000449-1/3	0.179193	0.191518	-0.012325	0	0.343692	0.11242	0.231272	0.08
ANKRD13A	HsaALTA0000449-2/3	0.818874	0.806105	0.012769	0	0.655342	0.885999	-0.230657	0.07
ANKRD13A	HsaALTA0000449-3/3	0.015853	0.015204	0.000648	0	0.01659	0.02014	-0.00355	0
ANKRD13A	HsaALTA0000450-1/2	0.990177	0.987859	0.002318	0	0.989719	0.989875	-0.000155	0
ANKRD13A	HsaALTA0000450-2/2	0.009679	0.013023	-0.003344	0	0.011626	0.010019	0.001606	0
ANKRD13C	HsaALTA0000453-1/2	0.084528	0.042213	0.042315	0	0.078673	0.31535	-0.236677	0
ANKRD13C	HsaALTA0000453-2/2	0.918078	0.958024	-0.039946	0	0.919571	0.698427	0.221145	0
ANKRD13D	HsaALTA0000455-1/3	0.044508	0.035246	0.009262	0	NA	NA	NA	NA
ANKRD13D	HsaALTA0000455-2/3	0.959675	0.966217	-0.006542	0	NA	NA	NA	NA
ANKRD13D	HsaALTA0000455-3/3	0.026082	0.036447	-0.010365	0.01	NA	NA	NA	NA
ANKRD13D	HsaALTA0000456-1/2	0.038839	0.050079	-0.011241	0	NA	NA	NA	NA
ANKRD13D	HsaALTA0000456-2/2	0.960016	0.951815	0.008201	0	NA	NA	NA	NA
ANKRD16	HsaALTA0000457-1/2	0.030807	0.035646	-0.00484	0	NA	NA	NA	NA
ANKRD16	HsaALTA0000457-2/2	0.967351	0.965484	0.001866	0	NA	NA	NA	NA
ANKRD18A	HsaALTA0000458-1/2	NA	NA	NA	NA	0.842064	0.702839	0.139225	0
ANKRD18A	HsaALTA0000458-2/2	NA	NA	NA	NA	0.158518	0.289776	-0.131258	0
ANKRD26	HsaALTA0000461-1/2	0.341646	0.411575	-0.069929	0	0.767553	0.435203	0.33235	0
ANKRD26	HsaALTA0000461-2/2	0.653867	0.593181	0.060686	0	0.236972	0.55839	-0.321418	0.03
ANKRD28	HsaALTA0000463-1/2	0.036649	0.043142	-0.006493	0	NA	NA	NA	NA
ANKRD28	HsaALTA0000463-2/2	0.963026	0.954634	0.008392	0	NA	NA	NA	NA
ANKRD37	HsaALTA0000468-1/6	0.006116	0.012293	-0.006177	0	NA	NA	NA	NA
ANKRD37	HsaALTA0000468-2/6	0.010321	0.029868	-0.019547	0	NA	NA	NA	NA
ANKRD37	HsaALTA0000468-3/6	0.990375	0.96278	0.027596	0	NA	NA	NA	NA
ANKRD37	HsaALTA0000468-4/6	0.006163	0.01198	-0.005817	0	NA	NA	NA	NA
ANKRD37	HsaALTA0000468-5/6	0.005767	0.019672	-0.013906	0	NA	NA	NA	NA
ANKRD37	HsaALTA0000468-6/6	0.005983	0.012665	-0.006683	0	NA	NA	NA	NA
ANKRD54	HsaALTA0000473-1/2	0.102531	0.09116	0.011371	0.01	NA	NA	NA	NA
ANKRD54	HsaALTA0000473-2/2	0.896609	0.910665	-0.014057	0	NA	NA	NA	NA
ANKRD54	HsaALTA0000474-1/2	0.957244	0.952607	0.004637	0	NA	NA	NA	NA
ANKRD54	HsaALTA0000474-2/2	0.038382	0.044924	-0.006543	0	NA	NA	NA	NA
ANKS6	HsaALTA0000476-1/2	NA	NA	NA	NA	0.546296	0.732342	-0.186046	0
ANKS6	HsaALTA0000476-2/2	NA	NA	NA	NA	0.456233	0.259695	0.196538	0
ANKZF1	HsaALTA0000477-1/2	0.995461	0.99407	0.001391	0	0.969814	0.952472	0.017342	0
ANKZF1	HsaALTA0000477-2/2	0.004267	0.005453	-0.001186	0	0.03101	0.044157	-0.013147	0
ANLN	HsaALTA0000478-1/3	0.017563	0.043129	-0.025566	0	0.007078	0.012715	-0.005637	0
ANLN	HsaALTA0000478-2/3	0.016843	0.014848	0.001995	0	0.007528	0.013485	-0.005957	0
ANLN	HsaALTA0000478-3/3	0.981344	0.960591	0.020754	0	0.992243	0.97339	0.018853	0
ANLN	HsaALTA0000479-1/2	0.041274	0.028021	0.013254	0	0.027316	0.056609	-0.029293	0
ANLN	HsaALTA0000479-2/2	0.960548	0.973564	-0.013016	0	0.973574	0.945666	0.027908	0
ANO9	HsaALTA0000481-1/2	0.965882	0.958221	0.007661	0	NA	NA	NA	NA
ANO9	HsaALTA0000481-2/2	0.035623	0.041128	-0.005504	0	NA	NA	NA	NA
ANO9	HsaALTA0000483-1/2	0.040681	0.075124	-0.034443	0	NA	NA	NA	NA
ANO9	HsaALTA0000483-2/2	0.956555	0.923244	0.033311	0	NA	NA	NA	NA
ANP32B	HsaALTA0000486-1/11	0.001172	0.000925	0.000247	0	0.000252	0.000314	-6.2e-05	0
ANP32B	HsaALTA0000486-10/11	0.015737	0.019789	-0.004052	0	0.007327	0.008249	-0.000922	0
ANP32B	HsaALTA0000486-11/11	0.981804	0.978156	0.003648	0	0.991837	0.991165	0.000671	0
ANXA11	HsaALTA0000493-1/2	0.98517	0.985985	-0.000815	0	0.973457	0.952638	0.020819	0
ANXA11	HsaALTA0000493-2/2	0.014492	0.014689	-0.000196	0	0.026052	0.058794	-0.032743	0.02
ANXA2	HsaALTA0000498-1/2	0.004943	0.005428	-0.000485	0	0.01239	0.008329	0.004061	0
ANXA2	HsaALTA0000498-2/2	0.99489	0.993846	0.001044	0	0.98589	0.991224	-0.005333	0
ANXA4	HsaALTA0000500-1/2	0.987687	0.994625	-0.006937	0	0.990935	0.971306	0.019629	0
ANXA4	HsaALTA0000500-2/2	0.011863	0.005762	0.006102	0	0.009766	0.025903	-0.016138	0
ANXA5	HsaALTA0000501-1/2	0.004473	0.001601	0.002872	0	0.001397	0.000874	0.000524	0
ANXA5	HsaALTA0000501-2/2	0.995509	0.998324	-0.002815	0	0.998655	0.999181	-0.000527	0
ANXA6	HsaALTA0000502-1/2	0.005977	0.003771	0.002206	0	0.019958	0.051844	-0.031886	0.02
ANXA6	HsaALTA0000502-2/2	0.993991	0.995921	-0.00193	0	0.979096	0.95382	0.025276	0
ANXA7	HsaALTA0000503-1/3	0.004474	0.007201	-0.002727	0	0.01656	0.020707	-0.004147	0
ANXA7	HsaALTA0000503-2/3	0.004252	0.004544	-0.000292	0	0.015944	0.012601	0.003343	0
ANXA7	HsaALTA0000503-3/3	0.99546	0.992864	0.002596	0	0.985164	0.978496	0.006668	0
ANXA7	HsaALTA0000504-1/3	0.029717	0.017658	0.012058	0	0.030342	0.050155	-0.019813	0.01
ANXA7	HsaALTA0000504-2/3	0.969183	0.981509	-0.012327	0	0.96673	0.94448	0.022251	0
ANXA7	HsaALTA0000504-3/3	0.010637	0.010907	-0.00027	0	0.029564	0.047374	-0.01781	0.01
AOX1	HsaALTA0000507-1/2	0.019875	0.016674	0.003201	0	0.02157	0.024539	-0.00297	0
AOX1	HsaALTA0000507-2/2	0.9798	0.983508	-0.003708	0	0.978678	0.975556	0.003122	0
AP1B1	HsaALTA0000509-1/2	0.98915	0.991572	-0.002422	0	0.986919	0.986534	0.000385	0
AP1B1	HsaALTA0000509-2/2	0.01075	0.008545	0.002205	0	0.012361	0.014089	-0.001729	0
AP1B1	HsaALTA0000510-1/2	0.008294	0.015405	-0.007111	0	0.014844	0.004909	0.009935	0
AP1B1	HsaALTA0000510-2/2	0.99211	0.98356	0.008549	0	0.985422	0.995115	-0.009693	0
AP1B1	HsaALTA0000511-1/2	0.023134	0.062075	-0.038941	0	NA	NA	NA	NA
AP1B1	HsaALTA0000511-2/2	0.976037	0.93958	0.036456	0	NA	NA	NA	NA
AP1B1	HsaALTA0000512-1/2	0.990672	0.98394	0.006732	0	0.984212	0.976172	0.008039	0
AP1B1	HsaALTA0000512-2/2	0.010646	0.017227	-0.006582	0	0.013704	0.022394	-0.00869	0
AP1G1	HsaALTA0000513-1/2	0.007702	0.012745	-0.005043	0	0.045197	0.034466	0.010731	0
AP1G1	HsaALTA0000513-2/2	0.992513	0.987011	0.005503	0	0.95512	0.969081	-0.013962	0
AP1G2	HsaALTA0000514-1/3	0.177978	0.18325	-0.005272	0	0.149871	0.098849	0.051022	0
AP1G2	HsaALTA0000514-2/3	0.826612	0.813609	0.013003	0	0.850315	0.90095	-0.050636	0
AP1G2	HsaALTA0000514-3/3	0.005547	0.005506	4.1e-05	0	0.004251	0.016759	-0.012508	0
AP1G2	HsaALTA0000515-1/2	0.561137	0.608323	-0.047187	0	0.512008	0.630209	-0.1182	0
AP1G2	HsaALTA0000515-2/2	0.437779	0.392649	0.045131	0	0.48233	0.370505	0.111825	0
AP1G2	HsaALTA0000517-1/3	0.013784	0.021601	-0.007816	0	NA	NA	NA	NA
AP1G2	HsaALTA0000517-2/3	0.819487	0.757441	0.062045	0	NA	NA	NA	NA
AP1G2	HsaALTA0000517-3/3	0.18486	0.242479	-0.057619	0	NA	NA	NA	NA
AP1G2	HsaALTA0000518-1/5	0.996462	0.995586	0.000877	0	0.998805	0.997911	0.000893	0
AP1G2	HsaALTA0000518-2/5	0.003463	0.004548	-0.001086	0	0.00126	0.002012	-0.000752	0
AP1G2	HsaALTA0000518-3/5	0.003283	0.004592	-0.00131	0	0.001114	0.002046	-0.000932	0
AP1G2	HsaALTA0000518-4/5	0.003444	0.004979	-0.001535	0	0.001124	0.002158	-0.001035	0
AP1G2	HsaALTA0000518-5/5	0.003377	0.004318	-0.000941	0	0.001134	0.002051	-0.000917	0
AP1S1	HsaALTA0000520-1/2	0.007105	0.007137	-3.3e-05	0	0.009046	0.015154	-0.006109	0
AP1S1	HsaALTA0000520-2/2	0.99162	0.992259	-0.000639	0	0.990207	0.983846	0.006361	0
AP2A2	HsaALTA0000522-1/2	0.761374	0.80192	-0.040546	0	0.789249	0.718071	0.071179	0
AP2A2	HsaALTA0000522-2/2	0.235105	0.19914	0.035965	0	0.209339	0.283263	-0.073924	0
AP2A2	HsaALTA0000524-1/6	0.013855	0.009396	0.004459	0	0.013729	0.024528	-0.010799	0
AP2A2	HsaALTA0000524-2/6	0.929498	0.962526	-0.033028	0	0.966013	0.977676	-0.011662	0
AP2A2	HsaALTA0000524-3/6	0.013856	0.009995	0.003861	0	0.013564	0.023779	-0.010216	0
AP2A2	HsaALTA0000524-4/6	0.040515	0.026728	0.013787	0	0.036222	0.023064	0.013158	0
AP2A2	HsaALTA0000524-5/6	0.038752	0.014967	0.023785	0	0.013913	0.023216	-0.009303	0
AP2A2	HsaALTA0000524-6/6	0.014	0.015499	-0.001499	0	0.014083	0.021665	-0.007582	0
AP2M1	HsaALTA0000526-1/4	0.004385	0.003236	0.001148	0	0.005114	0.004508	0.000606	0
AP2M1	HsaALTA0000526-2/4	0.006206	0.005448	0.000759	0	0.003198	0.00682	-0.003622	0
AP2M1	HsaALTA0000526-3/4	0.9933	0.994789	-0.001488	0	0.994761	0.993391	0.00137	0
AP2M1	HsaALTA0000526-4/4	0.004531	0.003327	0.001204	0	0.003533	0.004182	-0.000649	0
AP2S1	HsaALTA0000528-1/3	0.005231	0.003982	0.001249	0	0.01503	0.032543	-0.017514	0
AP2S1	HsaALTA0000528-2/3	0.994929	0.996293	-0.001364	0	0.986283	0.967591	0.018692	0
AP2S1	HsaALTA0000528-3/3	0.005238	0.004349	0.00089	0	0.01412	0.033323	-0.019203	0
AP3B1	HsaALTA0000530-1/2	0.983746	0.991375	-0.007629	0	0.978817	0.964076	0.014741	0
AP3B1	HsaALTA0000530-2/2	0.015067	0.008274	0.006794	0	0.024108	0.040278	-0.016171	0
AP3D1	HsaALTA0000532-1/2	0.387468	0.570908	-0.183441	0	0.547806	0.711168	-0.163363	0
AP3D1	HsaALTA0000532-2/2	0.618304	0.441225	0.17708	0	0.451066	0.277734	0.173332	0
APAF1	HsaALTA0000539-1/3	0.05998	0.053493	0.006487	0	NA	NA	NA	NA
APAF1	HsaALTA0000539-2/3	0.056563	0.084272	-0.027709	0	NA	NA	NA	NA
APAF1	HsaALTA0000539-3/3	0.950423	0.917693	0.03273	0.03	NA	NA	NA	NA
APBB2	HsaALTA0000542-1/2	0.580442	0.272776	0.307666	0	NA	NA	NA	NA
APBB2	HsaALTA0000542-2/2	0.423928	0.732157	-0.308228	0.3	NA	NA	NA	NA
APEH	HsaALTA0000546-1/2	0.004449	0.004496	-4.7e-05	0	0.007463	0.016902	-0.009439	0
APEH	HsaALTA0000546-2/2	0.995151	0.995188	-3.6e-05	0	0.992652	0.98236	0.010292	0
APEH	HsaALTA0000547-1/2	0.995149	0.991554	0.003596	0	0.957942	0.957896	4.5e-05	0
APEH	HsaALTA0000547-2/2	0.005248	0.007641	-0.002393	0	0.042201	0.047105	-0.004904	0
APEH	HsaALTA0000548-1/2	0.004371	0.004668	-0.000297	0	0.020556	0.019301	0.001255	0
APEH	HsaALTA0000548-2/2	0.995128	0.995201	-7.2e-05	0	0.978313	0.978297	1.6e-05	0
APH1A	HsaALTA0000551-1/2	0.028408	0.034669	-0.006261	0	NA	NA	NA	NA
APH1A	HsaALTA0000551-2/2	0.971023	0.964493	0.00653	0	NA	NA	NA	NA
APH1A	HsaALTA0000552-1/2	0.988105	0.995819	-0.007714	0	0.991848	0.96458	0.027268	0
APH1A	HsaALTA0000552-2/2	0.01181	0.004575	0.007235	0	0.009425	0.031184	-0.021759	0
API5	HsaALTA0000553-1/2	0.020643	0.020382	0.000261	0	0.015063	0.01117	0.003893	0
API5	HsaALTA0000553-2/2	0.979687	0.978736	0.000952	0	0.984432	0.989656	-0.005224	0
APIP	HsaALTA0000554-1/2	0.991371	0.983118	0.008252	0	0.981745	0.981823	-7.8e-05	0
APIP	HsaALTA0000554-2/2	0.00902	0.015639	-0.006618	0	0.019186	0.017253	0.001933	0
NAXE	HsaALTA0000555-1/3	0.047873	0.07316	-0.025287	0	0.030998	0.054091	-0.023093	0
NAXE	HsaALTA0000555-2/3	0.94979	0.922417	0.027373	0	0.964818	0.947209	0.017609	0
NAXE	HsaALTA0000555-3/3	0.04075	0.062364	-0.021614	0	0.030182	0.051446	-0.021264	0
NAXE	HsaALTA0000556-1/2	0.013094	0.010493	0.002601	0	0.011453	0.019829	-0.008375	0
NAXE	HsaALTA0000556-2/2	0.98826	0.991141	-0.002881	0	0.988448	0.981166	0.007282	0
NAXE	HsaALTA0000557-1/3	0.013725	0.013608	0.000117	0	0.017674	0.040585	-0.022911	0
NAXE	HsaALTA0000557-2/3	0.985798	0.986058	-0.00026	0	0.982601	0.960224	0.022377	0
NAXE	HsaALTA0000557-3/3	0.006476	0.005971	0.000505	0	0.017892	0.038644	-0.020752	0
APOA2	HsaALTA0000558-1/8	2.1e-05	6e-05	-4e-05	0	8.9e-05	5.6e-05	3.3e-05	0
APOA2	HsaALTA0000558-2/8	0.012029	0.011976	5.2e-05	0	0.008789	0.008145	0.000644	0
APOA2	HsaALTA0000558-3/8	1.9e-05	6.5e-05	-4.5e-05	0	8.8e-05	5.6e-05	3.2e-05	0
APOA2	HsaALTA0000558-4/8	1.8e-05	6.7e-05	-4.8e-05	0	0.000126	0.00016	-3.4e-05	0
APOA2	HsaALTA0000558-5/8	6.3e-05	0.000119	-5.6e-05	0	0.000188	0.000211	-2.3e-05	0
APOA2	HsaALTA0000558-6/8	0.987272	0.987487	-0.000215	0	0.991087	0.991571	-0.000484	0
APOA2	HsaALTA0000558-7/8	0.000516	0.000263	0.000253	0	0.000139	6.1e-05	7.8e-05	0
APOA2	HsaALTA0000558-8/8	5.9e-05	1.8e-05	4.1e-05	0	8.8e-05	0.000107	-1.9e-05	0
APOBEC3B	HsaALTA0000559-1/2	0.043876	0.053949	-0.010074	0	NA	NA	NA	NA
APOBEC3B	HsaALTA0000559-2/2	0.959591	0.945025	0.014566	0	NA	NA	NA	NA
APOC3	HsaALTA0000562-1/6	0.024801	0.017021	0.00778	0	0.013537	0.021274	-0.007736	0
APOC3	HsaALTA0000562-2/6	0.971041	0.979455	-0.008414	0	0.984146	0.943773	0.040373	0
APOC3	HsaALTA0000562-3/6	0.002525	0.001525	0.000999	0	0.004184	0.022192	-0.018009	0.01
APOC3	HsaALTA0000562-4/6	0.001098	0.001499	-0.000401	0	0.00422	0.024409	-0.020188	0.02
APOC3	HsaALTA0000562-5/6	0.003626	0.001563	0.002063	0	0.004298	0.024981	-0.020683	0.02
APOC3	HsaALTA0000562-6/6	0.001063	0.001556	-0.000492	0	0.006871	0.060564	-0.053692	0.05
APOC3	HsaALTA0000563-1/5	0.00122	0.001948	-0.000729	0	0.00307	0.004711	-0.001641	0
APOC3	HsaALTA0000563-2/5	0.000299	0.000754	-0.000455	0	0.001044	0.009596	-0.008552	0
APOC3	HsaALTA0000563-3/5	0.000183	0.000173	1e-05	0	0.000411	0.002147	-0.001735	0
APOC3	HsaALTA0000563-4/5	0.998073	0.99718	0.000893	0	0.996141	0.985687	0.010454	0
APOC3	HsaALTA0000563-5/5	0.000615	0.000186	0.000429	0	0.00066	0.002087	-0.001428	0
APOE	HsaALTA0000565-1/2	0.986011	0.983791	0.00222	0	0.992571	0.989019	0.003552	0
APOE	HsaALTA0000565-2/2	0.014022	0.015932	-0.00191	0	0.007529	0.011686	-0.004156	0
APOH	HsaALTA0000567-1/4	0.000268	0.000223	4.5e-05	0	0.000214	0.002086	-0.001873	0
APOH	HsaALTA0000567-2/4	0.000196	0.000267	-7.2e-05	0	0.000231	0.001015	-0.000783	0
APOH	HsaALTA0000567-3/4	0.999366	0.999367	-1e-06	0	0.997478	0.991646	0.005833	0
APOH	HsaALTA0000567-4/4	0.000336	0.000271	6.5e-05	0	0.002527	0.007295	-0.004767	0
APOL1	HsaALTA0000568-1/2	0.968356	0.966996	0.00136	0	0.982487	0.870473	0.112014	0.02
APOL1	HsaALTA0000568-2/2	0.031849	0.033116	-0.001267	0	0.016303	0.127228	-0.110925	0.02
APOL2	HsaALTA0000569-1/6	0.023679	0.011477	0.012201	0	NA	NA	NA	NA
APOL2	HsaALTA0000569-2/6	0.037385	0.017906	0.019479	0	NA	NA	NA	NA
APOL2	HsaALTA0000569-3/6	0.023608	0.018243	0.005365	0	NA	NA	NA	NA
APOL2	HsaALTA0000569-4/6	0.037455	0.067692	-0.030236	0	NA	NA	NA	NA
APOL2	HsaALTA0000569-5/6	0.945315	0.896957	0.048358	0	NA	NA	NA	NA
APOL2	HsaALTA0000569-6/6	0.024731	0.032083	-0.007352	0	NA	NA	NA	NA
APP	HsaALTA0000573-1/3	0.003565	0.001738	0.001826	0	0.004727	0.004572	0.000156	0
APP	HsaALTA0000573-2/3	0.996588	0.998167	-0.001579	0	0.995171	0.995374	-0.000203	0
APP	HsaALTA0000573-3/3	0.001063	0.001668	-0.000605	0	0.00486	0.004437	0.000423	0
APPL2	HsaALTA0000574-1/3	0.027775	0.038658	-0.010883	0	0.039574	0.041588	-0.002014	0
APPL2	HsaALTA0000574-2/3	0.023071	0.03746	-0.014389	0	0.039642	0.043902	-0.00426	0
APPL2	HsaALTA0000574-3/3	0.973084	0.960558	0.012526	0	0.961815	0.955929	0.005887	0
APRT	HsaALTA0000575-1/2	0.997119	0.997629	-0.000509	0	0.988535	0.986198	0.002337	0
APRT	HsaALTA0000575-2/2	0.002706	0.002428	0.000278	0	0.01176	0.014592	-0.002832	0
APTX	HsaALTA0000576-1/3	0.986843	0.976402	0.010441	0	NA	NA	NA	NA
APTX	HsaALTA0000576-2/3	0.014619	0.024015	-0.009396	0	NA	NA	NA	NA
APTX	HsaALTA0000576-3/3	0.014474	0.015498	-0.001024	0	NA	NA	NA	NA
APTX	HsaALTA0000577-1/2	0.438823	0.42188	0.016943	0	0.401186	0.44628	-0.045094	0
APTX	HsaALTA0000577-2/2	0.565199	0.575811	-0.010612	0	0.601802	0.556382	0.04542	0
ARAF	HsaALTA0000580-1/2	0.044611	0.029963	0.014648	0	0.075427	0.037352	0.038075	0
ARAF	HsaALTA0000580-2/2	0.953128	0.970725	-0.017598	0	0.928639	0.962008	-0.033369	0
ARAF	HsaALTA0000581-1/2	0.973554	0.965808	0.007746	0	0.980881	0.978326	0.002555	0
ARAF	HsaALTA0000581-2/2	0.027434	0.035817	-0.008383	0	0.017427	0.022084	-0.004657	0
ARAP1	HsaALTA0000582-1/6	0.01735	0.01978	-0.00243	0	NA	NA	NA	NA
ARAP1	HsaALTA0000582-2/6	0.066939	0.055499	0.01144	0	NA	NA	NA	NA
ARAP1	HsaALTA0000582-3/6	0.919805	0.940092	-0.020288	0	NA	NA	NA	NA
ARAP1	HsaALTA0000582-4/6	0.027185	0.0188	0.008385	0	NA	NA	NA	NA
ARAP1	HsaALTA0000582-5/6	0.018424	0.021472	-0.003048	0	NA	NA	NA	NA
ARAP1	HsaALTA0000582-6/6	0.017999	0.021418	-0.00342	0	NA	NA	NA	NA
ARAP1	HsaALTA0000583-1/3	0.043872	0.029575	0.014297	0	0.007493	0.033151	-0.025658	0
ARAP1	HsaALTA0000583-2/3	0.026628	0.032663	-0.006035	0	0.007931	0.033807	-0.025876	0
ARAP1	HsaALTA0000583-3/3	0.956123	0.96741	-0.011287	0	0.991835	0.967134	0.024701	0
ARF4	HsaALTA0000589-1/3	0.988496	0.98719	0.001306	0	0.976603	0.982474	-0.005871	0
ARF4	HsaALTA0000589-2/3	0.011198	0.013435	-0.002238	0	0.025977	0.020373	0.005604	0
ARF4	HsaALTA0000589-3/3	0.002474	0.002481	-7e-06	0	0.024166	0.019022	0.005144	0
ARF5	HsaALTA0000590-1/3	0.003734	0.002959	0.000774	0	0.006997	0.007177	-0.00018	0
ARF5	HsaALTA0000590-2/3	0.003607	0.002861	0.000746	0	0.006692	0.019953	-0.01326	0
ARF5	HsaALTA0000590-3/3	0.996482	0.996853	-0.000371	0	0.992707	0.980363	0.012344	0
ARFGAP1	HsaALTA0000591-1/2	0.073179	0.00471	0.068469	0.03	0.007328	0.023015	-0.015686	0
ARFGAP1	HsaALTA0000591-2/2	0.927786	0.995522	-0.067735	0.03	0.992435	0.97849	0.013945	0
ARFGAP2	HsaALTA0000592-1/2	0.008539	0.010013	-0.001474	0	0.025646	0.014358	0.011288	0
ARFGAP2	HsaALTA0000592-2/2	0.99128	0.990375	0.000905	0	0.972575	0.986006	-0.013431	0
ARFGEF1	HsaALTA0000593-1/3	0.017036	0.021257	-0.004221	0	0.041945	0.022467	0.019478	0
ARFGEF1	HsaALTA0000593-2/3	0.979752	0.961253	0.018499	0	0.956246	0.977881	-0.021635	0
ARFGEF1	HsaALTA0000593-3/3	0.020053	0.03779	-0.017737	0	0.04373	0.024049	0.019682	0
ARFGEF1	HsaALTA0000594-1/2	0.038778	0.037184	0.001594	0	NA	NA	NA	NA
ARFGEF1	HsaALTA0000594-2/2	0.960589	0.960806	-0.000217	0	NA	NA	NA	NA
ARFGEF1	HsaALTA0000595-1/3	0.019722	0.01684	0.002882	0	0.043938	0.11536	-0.071423	0.06
ARFGEF1	HsaALTA0000595-2/3	0.034222	0.026771	0.007451	0	0.042747	0.049346	-0.006599	0
ARFGEF1	HsaALTA0000595-3/3	0.956395	0.971736	-0.015341	0	0.957584	0.882452	0.075132	0
ARFIP2	HsaALTA0000597-1/3	0.445813	0.384698	0.061115	0	0.334455	0.262245	0.072211	0
ARFIP2	HsaALTA0000597-2/3	0.547678	0.607368	-0.05969	0	0.668241	0.735274	-0.067033	0.06
ARFIP2	HsaALTA0000597-3/3	0.026667	0.026034	0.000633	0	0.016192	0.027519	-0.011326	0
ARG1	HsaALTA0000599-1/2	0.957846	0.996396	-0.038551	0	0.97544	0.982615	-0.007174	0
ARG1	HsaALTA0000599-2/2	0.037176	0.003495	0.033681	0	0.021359	0.017611	0.003748	0
ARG1	HsaALTA0000600-1/2	0.034895	0.013169	0.021726	0	0.057111	0.03459	0.02252	0
ARG1	HsaALTA0000600-2/2	0.966984	0.987501	-0.020517	0	0.943592	0.962553	-0.01896	0
ARHGAP17	HsaALTA0000604-1/2	0.00682	0.010072	-0.003252	0	0.008406	0.013886	-0.00548	0
ARHGAP17	HsaALTA0000604-2/2	0.992326	0.991162	0.001165	0	0.991582	0.98633	0.005252	0
ARHGAP21	HsaALTA0000606-1/6	0.015883	0.03161	-0.015727	0	NA	NA	NA	NA
ARHGAP21	HsaALTA0000606-2/6	0.014906	0.033912	-0.019006	0	NA	NA	NA	NA
ARHGAP21	HsaALTA0000606-3/6	0.016102	0.031706	-0.015604	0	NA	NA	NA	NA
ARHGAP21	HsaALTA0000606-4/6	0.016585	0.03264	-0.016055	0	NA	NA	NA	NA
ARHGAP21	HsaALTA0000606-5/6	0.985056	0.968616	0.01644	0	NA	NA	NA	NA
ARHGAP21	HsaALTA0000606-6/6	0.014248	0.033424	-0.019176	0	NA	NA	NA	NA
ARHGAP29	HsaALTA0000613-1/2	0.028837	0.020908	0.007929	0	0.020882	0.020311	0.000571	0
ARHGAP29	HsaALTA0000613-2/2	0.974096	0.979488	-0.005392	0	0.978529	0.980789	-0.00226	0
ARHGAP5	HsaALTA0000616-1/2	0.182427	0.214981	-0.032554	0	0.310501	0.113628	0.196873	0
ARHGAP5	HsaALTA0000616-2/2	0.816529	0.781577	0.034953	0	0.690997	0.894021	-0.203024	0
ARHGEF2	HsaALTA0000629-1/2	0.016177	0.02248	-0.006303	0	0.02228	0.026127	-0.003846	0
ARHGEF2	HsaALTA0000629-2/2	0.984203	0.977549	0.006654	0	0.978131	0.971265	0.006866	0
ARHGEF2	HsaALTA0000630-1/3	0.015147	0.023037	-0.00789	0	NA	NA	NA	NA
ARHGEF2	HsaALTA0000630-2/3	0.309195	0.375101	-0.065906	0	NA	NA	NA	NA
ARHGEF2	HsaALTA0000630-3/3	0.692739	0.624758	0.067982	0	NA	NA	NA	NA
ARHGEF40	HsaALTA0000634-1/3	0.054135	0.051075	0.00306	0	0.058478	0.042081	0.016398	0
ARHGEF40	HsaALTA0000634-2/3	0.942319	0.945889	-0.003569	0	0.943965	0.900657	0.043308	0
ARHGEF40	HsaALTA0000634-3/3	0.058603	0.053129	0.005474	0	0.061434	0.099215	-0.037781	0.03
ARID2	HsaALTA0000637-1/3	0.036953	0.039798	-0.002845	0	0.022386	0.0204	0.001985	0
ARID2	HsaALTA0000637-2/3	0.034592	0.040415	-0.005823	0	0.021751	0.021497	0.000254	0
ARID2	HsaALTA0000637-3/3	0.963817	0.962084	0.001733	0	0.977218	0.977694	-0.000476	0
ARID4B	HsaALTA0000638-1/2	0.045099	0.053694	-0.008595	0	0.029331	0.026846	0.002485	0
ARID4B	HsaALTA0000638-2/2	0.956285	0.94335	0.012935	0	0.968974	0.971426	-0.002452	0
ARL16	HsaALTA0000644-1/2	0.983749	0.985031	-0.001282	0	NA	NA	NA	NA
ARL16	HsaALTA0000644-2/2	0.015464	0.015147	0.000317	0	NA	NA	NA	NA
ARL6IP4	HsaALTA0000647-1/3	0.01666	0.035966	-0.019306	0	0.066894	0.041155	0.025739	0
ARL6IP4	HsaALTA0000647-2/3	0.792455	0.791737	0.000719	0	0.887014	0.927526	-0.040512	0
ARL6IP4	HsaALTA0000647-3/3	0.192579	0.176177	0.016401	0	0.050099	0.031215	0.018884	0
ARMC8	HsaALTA0000651-1/2	0.828263	0.827862	0.000401	0	NA	NA	NA	NA
ARMC8	HsaALTA0000651-2/2	0.163739	0.172324	-0.008585	0	NA	NA	NA	NA
ARMC8	HsaALTA0000652-1/2	0.013838	0.023815	-0.009976	0	0.014936	0.014363	0.000573	0
ARMC8	HsaALTA0000652-2/2	0.985948	0.975256	0.010692	0	0.984553	0.986689	-0.002136	0
ARMCX3	HsaALTA0000657-1/2	0.736682	0.647472	0.089209	0	0.803886	0.780141	0.023745	0
ARMCX3	HsaALTA0000657-2/2	0.259244	0.353849	-0.094605	0	0.19616	0.22012	-0.02396	0
ARNT	HsaALTA0000662-1/2	0.07162	0.090172	-0.018551	0	0.062566	0.070889	-0.008323	0
ARNT	HsaALTA0000662-2/2	0.9269	0.910862	0.016038	0	0.935816	0.925065	0.010751	0
ARNT	HsaALTA0000663-1/2	0.022712	0.019933	0.002779	0	0.016977	0.036725	-0.019747	0
ARNT	HsaALTA0000663-2/2	0.976817	0.98142	-0.004604	0	0.983073	0.962927	0.020146	0
ARNT	HsaALTA0000665-1/2	0.019637	0.020534	-0.000897	0	0.008988	0.029271	-0.020283	0
ARNT	HsaALTA0000665-2/2	0.980947	0.977644	0.003303	0	0.991563	0.96891	0.022653	0
ARNT	HsaALTA0000666-1/2	0.126059	0.156984	-0.030924	0	NA	NA	NA	NA
ARNT	HsaALTA0000666-2/2	0.875271	0.84595	0.029321	0	NA	NA	NA	NA
ARNT	HsaALTA0000667-1/4	0.948067	0.927618	0.02045	0	0.975301	0.956915	0.018386	0
ARNT	HsaALTA0000667-2/4	0.031251	0.056145	-0.024893	0	0.008717	0.0264	-0.017684	0
ARNT	HsaALTA0000667-3/4	0.034494	0.03794	-0.003446	0	0.022818	0.032288	-0.00947	0
ARNT	HsaALTA0000667-4/4	0.021737	0.023513	-0.001776	0	0.008761	0.011768	-0.003007	0
ARPC2	HsaALTA0000677-1/2	0.987334	0.983448	0.003887	0	0.965752	0.943576	0.022176	0
ARPC2	HsaALTA0000677-2/2	0.013095	0.017722	-0.004627	0	0.034076	0.052315	-0.018239	0.01
ARPC2	HsaALTA0000679-1/2	0.002339	0.001304	0.001035	0	0.001143	0.001086	5.7e-05	0
ARPC2	HsaALTA0000679-2/2	0.997724	0.998711	-0.000986	0	0.998896	0.998927	-3.1e-05	0
ARPC2	HsaALTA0000680-1/2	0.998358	0.998665	-0.000307	0	0.998918	0.998403	0.000516	0
ARPC2	HsaALTA0000680-2/2	0.001557	0.001317	0.00024	0	0.001145	0.001552	-0.000406	0
ARPC5	HsaALTA0000684-1/4	0.174712	0.089957	0.084755	0.01	0.052121	0.126725	-0.074603	0
ARPC5	HsaALTA0000684-2/4	0.827511	0.908655	-0.081144	0	0.947718	0.872111	0.075607	0
ARPC5	HsaALTA0000684-3/4	0.005241	0.00591	-0.000669	0	0.005566	0.013409	-0.007843	0
ARPC5	HsaALTA0000684-4/4	0.00571	0.005057	0.000653	0	0.005788	0.013646	-0.007858	0
ARRB2	HsaALTA0000689-1/2	0.006167	0.008389	-0.002222	0	0.025549	0.03391	-0.008361	0
ARRB2	HsaALTA0000689-2/2	0.99285	0.992365	0.000485	0	0.975173	0.965184	0.009988	0
ARRB2	HsaALTA0000690-1/2	0.983231	0.950366	0.032865	0	0.857183	0.967081	-0.109899	0
ARRB2	HsaALTA0000690-2/2	0.016995	0.051313	-0.034318	0	0.141653	0.032845	0.108808	0
ARRDC1	HsaALTA0000692-1/3	0.927555	0.845951	0.081604	0	NA	NA	NA	NA
ARRDC1	HsaALTA0000692-2/3	0.04728	0.062945	-0.015665	0	NA	NA	NA	NA
ARRDC1	HsaALTA0000692-3/3	0.073416	0.11911	-0.045694	0	NA	NA	NA	NA
ARRDC1	HsaALTA0000694-1/2	0.954247	0.963718	-0.009471	0	NA	NA	NA	NA
ARRDC1	HsaALTA0000694-2/2	0.046464	0.036332	0.010132	0	NA	NA	NA	NA
ARSE	HsaALTA0000698-1/2	0.697006	0.757344	-0.060338	0	0.759288	0.775706	-0.016419	0
ARSE	HsaALTA0000698-2/2	0.306551	0.241918	0.064633	0	0.243373	0.231056	0.012316	0
ARVCF	HsaALTA0000702-1/2	0.982378	0.973867	0.008511	0	0.955532	0.948271	0.007261	0
ARVCF	HsaALTA0000702-2/2	0.015792	0.025981	-0.010188	0	0.045366	0.047962	-0.002596	0
ASAP3	HsaALTA0000704-1/5	0.071043	0.025591	0.045453	0	NA	NA	NA	NA
ASAP3	HsaALTA0000704-2/5	0.889227	0.936389	-0.047163	0	NA	NA	NA	NA
ASAP3	HsaALTA0000704-3/5	0.029869	0.026053	0.003816	0	NA	NA	NA	NA
ASAP3	HsaALTA0000704-4/5	0.030335	0.026723	0.003612	0	NA	NA	NA	NA
ASAP3	HsaALTA0000704-5/5	0.072609	0.06449	0.00812	0	NA	NA	NA	NA
ASB1	HsaALTA0000705-1/2	0.782644	0.865041	-0.082397	0	0.762463	0.727443	0.035021	0
ASB1	HsaALTA0000705-2/2	0.219995	0.131454	0.088542	0	0.237214	0.270731	-0.033518	0
ASB9	HsaALTA0000709-1/2	0.05339	0.041656	0.011734	0	NA	NA	NA	NA
ASB9	HsaALTA0000709-2/2	0.942591	0.958726	-0.016135	0	NA	NA	NA	NA
ASCC2	HsaALTA0000710-1/2	0.982686	0.983456	-0.00077	0	0.978906	0.933903	0.045003	0
ASCC2	HsaALTA0000710-2/2	0.015934	0.017298	-0.001364	0	0.021187	0.066081	-0.044894	0
ASCC3	HsaALTA0000712-1/2	NA	NA	NA	NA	0.07045	0.038559	0.031892	0
ASCC3	HsaALTA0000712-2/2	NA	NA	NA	NA	0.931768	0.959306	-0.027538	0
ASCC3	HsaALTA0000713-1/2	0.046683	0.032043	0.01464	0	NA	NA	NA	NA
ASCC3	HsaALTA0000713-2/2	0.953684	0.969012	-0.015328	0	NA	NA	NA	NA
ASCC3	HsaALTA0000714-1/3	NA	NA	NA	NA	0.118661	0.031389	0.087272	0
ASCC3	HsaALTA0000714-2/3	NA	NA	NA	NA	0.841049	0.825607	0.015442	0
ASCC3	HsaALTA0000714-3/3	NA	NA	NA	NA	0.069116	0.162178	-0.093062	0.09
ASNA1	HsaALTA0000718-1/2	0.018889	0.008477	0.010412	0	0.010547	0.017846	-0.0073	0
ASNA1	HsaALTA0000718-2/2	0.980059	0.992204	-0.012145	0	0.988772	0.981832	0.00694	0
ASNS	HsaALTA0000719-1/2	0.918224	0.953329	-0.035104	0	0.727742	0.888699	-0.160957	0
ASNS	HsaALTA0000719-2/2	0.080316	0.045728	0.034588	0	0.269582	0.111229	0.158353	0
ASNS	HsaALTA0000720-1/3	0.028078	0.028247	-0.000169	0	NA	NA	NA	NA
ASNS	HsaALTA0000720-2/3	0.004839	0.005817	-0.000978	0	NA	NA	NA	NA
ASNS	HsaALTA0000720-3/3	0.972298	0.972566	-0.000268	0	NA	NA	NA	NA
ASNSD1	HsaALTA0000721-1/5	0.273761	0.258943	0.014818	0	0.176235	0.204462	-0.028227	0
ASNSD1	HsaALTA0000721-2/5	0.011435	0.014251	-0.002817	0	0.005398	0.013115	-0.007717	0
ASNSD1	HsaALTA0000721-3/5	0.729809	0.737474	-0.007665	0	0.827523	0.792551	0.034971	0
ASNSD1	HsaALTA0000721-4/5	0.011654	0.014233	-0.00258	0	0.005346	0.009334	-0.003988	0
ASNSD1	HsaALTA0000721-5/5	0.011985	0.014596	-0.002611	0	0.005447	0.008766	-0.003319	0
ASPH	HsaALTA0000722-1/2	0.995235	0.990332	0.004903	0	0.991685	0.987769	0.003916	0
ASPH	HsaALTA0000722-2/2	0.004555	0.008636	-0.004081	0	0.009342	0.013534	-0.004193	0
ASPH	HsaALTA0000724-1/2	0.163123	0.155066	0.008057	0	0.19445	0.224559	-0.03011	0
ASPH	HsaALTA0000724-2/2	0.83766	0.847695	-0.010035	0	0.806136	0.771072	0.035064	0
ASPH	HsaALTA0000725-1/2	0.003165	0.006471	-0.003305	0	0.007922	0.006867	0.001054	0
ASPH	HsaALTA0000725-2/2	0.99677	0.993913	0.002856	0	0.992263	0.993147	-0.000884	0
ASPH	HsaALTA0000727-3/4	0.002158	0.004697	-0.002539	0	0.002436	0.002085	0.000351	0
ASPH	HsaALTA0000727-4/4	0.002261	0.00464	-0.00238	0	0.002449	0.002106	0.000343	0
ASRGL1	HsaALTA0000730-1/3	0.045305	0.032723	0.012582	0	NA	NA	NA	NA
ASRGL1	HsaALTA0000730-2/3	0.713309	0.499447	0.213862	0	NA	NA	NA	NA
ASRGL1	HsaALTA0000730-3/3	0.262849	0.498686	-0.235838	0	NA	NA	NA	NA
ASS1	HsaALTA0000731-1/3	0.978285	0.987876	-0.009591	0	NA	NA	NA	NA
ASS1	HsaALTA0000731-3/3	0.023221	0.013152	0.010069	0	NA	NA	NA	NA
ASXL1	HsaALTA0000733-1/2	0.071189	0.065217	0.005972	0	0.051456	0.056896	-0.00544	0.01
ASXL1	HsaALTA0000733-2/2	0.931973	0.933157	-0.001184	0	0.946647	0.94792	-0.001273	0
ASXL1	HsaALTA0000735-1/2	0.055977	0.128287	-0.07231	0	NA	NA	NA	NA
ASXL1	HsaALTA0000735-2/2	0.947819	0.873423	0.074397	0	NA	NA	NA	NA
ATAD2	HsaALTA0000739-1/2	0.017263	0.023871	-0.006608	0	0.050906	0.115274	-0.064368	0
ATAD2	HsaALTA0000739-2/2	0.982604	0.974101	0.008503	0	0.946144	0.87929	0.066854	0
ATAD2	HsaALTA0000740-1/3	0.010809	0.010781	2.8e-05	0	0.012945	0.010363	0.002583	0
ATAD2	HsaALTA0000740-2/3	0.006547	0.010392	-0.003845	0	0.014073	0.024092	-0.010019	0
ATAD2	HsaALTA0000740-3/3	0.989371	0.989761	-0.00039	0	0.987223	0.976892	0.010331	0
ATAD2	HsaALTA0000741-1/4	0.010266	0.010059	0.000208	0	0.006808	0.00837	-0.001562	0
ATAD2	HsaALTA0000741-2/4	0.004821	0.010391	-0.005571	0	0.004015	0.005312	-0.001297	0
ATAD2	HsaALTA0000741-3/4	0.988737	0.986588	0.002149	0	0.992929	0.988068	0.004861	0
ATAD2	HsaALTA0000741-4/4	0.005104	0.006246	-0.001142	0	0.003874	0.002243	0.001631	0
ATF2	HsaALTA0000745-1/2	0.994314	0.993318	0.000996	0	0.985485	0.975821	0.009664	0
ATF2	HsaALTA0000745-2/2	0.005912	0.006547	-0.000635	0	0.015233	0.022808	-0.007575	0
ATF6	HsaALTA0000749-1/2	0.011636	0.010272	0.001364	0	0.009081	0.010745	-0.001664	0
ATF6	HsaALTA0000749-2/2	0.988698	0.989616	-0.000918	0	0.990096	0.989328	0.000768	0
ATF7IP2	HsaALTA0000750-1/2	0.008751	0.03592	-0.027169	0	0.030455	0.029583	0.000871	0
ATF7IP2	HsaALTA0000750-2/2	0.990538	0.963701	0.026836	0	0.970556	0.970518	3.8e-05	0
ATG16L1	HsaALTA0000755-1/3	0.013018	0.031729	-0.018711	0	NA	NA	NA	NA
ATG16L1	HsaALTA0000755-2/3	0.987347	0.970821	0.016527	0	NA	NA	NA	NA
ATG16L1	HsaALTA0000755-3/3	0.012977	0.032046	-0.01907	0	NA	NA	NA	NA
ATG16L2	HsaALTA0000757-1/2	NA	NA	NA	NA	0.027111	0.033265	-0.006154	0
ATG16L2	HsaALTA0000757-2/2	NA	NA	NA	NA	0.97389	0.965122	0.008768	0
ATG4B	HsaALTA0000761-1/2	0.019628	0.01505	0.004578	0	0.01849	0.012403	0.006087	0
ATG4B	HsaALTA0000761-2/2	0.980656	0.984356	-0.0037	0	0.981329	0.987633	-0.006304	0
ATG4B	HsaALTA0000762-1/2	0.99674	0.995302	0.001438	0	0.956792	0.962475	-0.005683	0
ATG4B	HsaALTA0000762-2/2	0.003469	0.004444	-0.000975	0	0.041983	0.04081	0.001173	0
ATG4C	HsaALTA0000763-1/2	0.058314	0.050849	0.007465	0	0.022	0.047867	-0.025867	0
ATG4C	HsaALTA0000763-2/2	0.940043	0.948864	-0.008821	0	0.978901	0.952281	0.026621	0
ATG9A	HsaALTA0000767-1/3	0.012583	0.011952	0.000632	0	0.031019	0.030121	0.000897	0
ATG9A	HsaALTA0000767-2/3	0.086059	0.122893	-0.036835	0	0.181385	0.154866	0.026519	0
ATG9A	HsaALTA0000767-3/3	0.911931	0.878113	0.033818	0	0.812664	0.86507	-0.052406	0.05
ATG9A	HsaALTA0000768-1/2	0.976498	0.979914	-0.003416	0	0.982811	0.951618	0.031193	0
ATG9A	HsaALTA0000768-2/2	0.023241	0.018841	0.004401	0	0.018535	0.048419	-0.029884	0
ATG9A	HsaALTA0000769-1/2	0.976422	0.986783	-0.010362	0	0.947009	0.964167	-0.017158	0
ATG9A	HsaALTA0000769-2/2	0.025454	0.012597	0.012857	0	0.054277	0.036973	0.017304	0
PGGHG	HsaALTA0000771-1/2	0.051976	0.036195	0.015781	0	NA	NA	NA	NA
PGGHG	HsaALTA0000771-2/2	0.949193	0.964754	-0.01556	0	NA	NA	NA	NA
PGGHG	HsaALTA0000772-1/5	0.046937	0.026648	0.020289	0	0.037443	0.054329	-0.016886	0.01
PGGHG	HsaALTA0000772-2/5	0.028898	0.027224	0.001675	0	0.035695	0.06058	-0.024885	0.02
PGGHG	HsaALTA0000772-3/5	0.028305	0.06496	-0.036655	0	0.040127	0.052938	-0.012811	0.01
PGGHG	HsaALTA0000772-4/5	0.956127	0.936798	0.019328	0	0.966302	0.941719	0.024583	0
PGGHG	HsaALTA0000772-5/5	0.025706	0.027842	-0.002136	0	0.037931	0.064586	-0.026655	0.02
ATIC	HsaALTA0000775-1/2	0.996027	0.996243	-0.000216	0	0.991942	0.988649	0.003293	0
ATIC	HsaALTA0000775-2/2	0.004258	0.003343	0.000915	0	0.009163	0.010274	-0.001111	0
ATL2	HsaALTA0000776-1/2	0.012848	0.007633	0.005215	0	0.053288	0.040635	0.012654	0
ATL2	HsaALTA0000776-2/2	0.98683	0.99162	-0.00479	0	0.942985	0.958392	-0.015407	0
ATM	HsaALTA0000778-1/2	0.025063	0.0393	-0.014237	0.01	NA	NA	NA	NA
ATM	HsaALTA0000778-2/2	0.972818	0.960085	0.012733	0	NA	NA	NA	NA
ATP11A	HsaALTA0000781-1/3	0.626788	0.459001	0.167786	0	0.336746	0.307951	0.028795	0
ATP11A	HsaALTA0000781-2/3	0.209597	0.366037	-0.15644	0	0.44527	0.641176	-0.195906	0
ATP11A	HsaALTA0000781-3/3	0.169837	0.189883	-0.020046	0	0.237195	0.101897	0.135297	0
ATP11B	HsaALTA0000782-1/2	0.027375	0.031104	-0.00373	0	0.02105	0.02892	-0.00787	0
ATP11B	HsaALTA0000782-2/2	0.969931	0.967398	0.002533	0	0.978854	0.970546	0.008308	0
ATP13A1	HsaALTA0000783-1/2	0.127802	0.090082	0.03772	0	0.4611	0.155923	0.305177	0.1
ATP13A1	HsaALTA0000783-2/2	0.873386	0.915195	-0.041808	0	0.547569	0.840582	-0.293013	0.1
ATP13A1	HsaALTA0000784-1/2	0.012462	0.014205	-0.001744	0	NA	NA	NA	NA
ATP13A1	HsaALTA0000784-2/2	0.986555	0.986669	-0.000114	0	NA	NA	NA	NA
ATP13A1	HsaALTA0000785-1/2	0.008733	0.006799	0.001934	0	0.014189	0.037275	-0.023086	0
ATP13A1	HsaALTA0000785-2/2	0.990977	0.993177	-0.002201	0	0.985721	0.961564	0.024157	0
ATP13A2	HsaALTA0000786-1/3	0.017413	0.022703	-0.00529	0	0.033401	0.04015	-0.006748	0
ATP13A2	HsaALTA0000786-2/3	0.12777	0.064443	0.063327	0	0.123156	0.034499	0.088657	0
ATP13A2	HsaALTA0000786-3/3	0.872587	0.936143	-0.063556	0	0.878018	0.962958	-0.08494	0
ATP13A2	HsaALTA0000787-1/2	0.019656	0.057599	-0.037943	0	NA	NA	NA	NA
ATP13A2	HsaALTA0000787-2/2	0.980036	0.94019	0.039846	0	NA	NA	NA	NA
ATP13A2	HsaALTA0000788-1/4	0.023559	0.038776	-0.015217	0	0.052518	0.04334	0.009177	0
ATP13A2	HsaALTA0000788-2/4	0.022413	0.034764	-0.012351	0	0.045906	0.040266	0.00564	0
ATP13A2	HsaALTA0000788-3/4	0.057432	0.037424	0.020008	0	0.111813	0.041013	0.0708	0
ATP13A2	HsaALTA0000788-4/4	0.943106	0.963464	-0.020358	0	0.882964	0.959904	-0.07694	0
ATP13A2	HsaALTA0000789-1/2	0.196384	0.183857	0.012526	0	NA	NA	NA	NA
ATP13A2	HsaALTA0000789-2/2	0.80682	0.824795	-0.017975	0	NA	NA	NA	NA
ATP2A2	HsaALTA0000793-1/2	0.003763	0.005382	-0.001619	0	0.003262	0.005385	-0.002123	0
ATP2A2	HsaALTA0000793-2/2	0.996282	0.994855	0.001427	0	0.99662	0.994847	0.001773	0
ATP2B4	HsaALTA0000798-1/2	0.051243	0.057531	-0.006288	0	NA	NA	NA	NA
ATP2B4	HsaALTA0000798-2/2	0.950174	0.942659	0.007515	0	NA	NA	NA	NA
ATP2C1	HsaALTA0000800-1/3	0.008466	0.008188	0.000278	0	0.011752	0.011359	0.000393	0
ATP2C1	HsaALTA0000800-2/3	0.991006	0.990914	9.2e-05	0	0.987667	0.988291	-0.000625	0
ATP2C1	HsaALTA0000800-3/3	0.008567	0.008014	0.000553	0	0.012551	0.010823	0.001728	0
ATP2C1	HsaALTA0000801-1/3	0.013049	0.011714	0.001335	0	0.010884	0.009251	0.001633	0
ATP2C1	HsaALTA0000801-2/3	0.015323	0.011422	0.003901	0	0.017754	0.008555	0.009199	0
ATP2C1	HsaALTA0000801-3/3	0.986779	0.987886	-0.001106	0	0.983474	0.991191	-0.007717	0
ATP5A1	HsaALTA0000802-1/3	0.001899	0.001698	0.000201	0	0.011558	0.011511	4.7e-05	0
ATP5A1	HsaALTA0000802-2/3	0.001956	0.001841	0.000115	0	0.01099	0.012052	-0.001062	0
ATP5A1	HsaALTA0000802-3/3	0.997878	0.998168	-0.00029	0	0.988042	0.987826	0.000216	0
ATP5B	HsaALTA0000804-1/5	0.000656	0.000661	-5e-06	0	0.002323	0.012525	-0.010202	0
ATP5B	HsaALTA0000804-2/5	0.000685	0.000612	7.4e-05	0	0.002546	0.002614	-6.8e-05	0
ATP5B	HsaALTA0000804-3/5	0.998384	0.999368	-0.000984	0	0.997497	0.987332	0.010164	0
ATP5B	HsaALTA0000804-4/5	0.000686	0.000648	3.8e-05	0	0.002611	0.002644	-3.3e-05	0
ATP5B	HsaALTA0000804-5/5	0.001667	0.000627	0.00104	0	0.002527	0.002429	9.8e-05	0
ATP5B	HsaALTA0000805-1/4	0.000753	0.000749	4e-06	0	0.006678	0.008614	-0.001937	0
ATP5B	HsaALTA0000805-2/4	0.000683	0.000713	-3e-05	0	0.00719	0.008441	-0.001252	0
ATP5B	HsaALTA0000805-3/4	0.999227	0.999314	-8.7e-05	0	0.993126	0.99214	0.000986	0
ATP5B	HsaALTA0000805-4/4	0.000706	0.000669	3.6e-05	0	0.006674	0.008196	-0.001523	0
ATP5C1	HsaALTA0000806-1/2	0.004901	0.002432	0.002469	0	0.001968	0.005663	-0.003696	0
ATP5C1	HsaALTA0000806-2/2	0.994865	0.997569	-0.002704	0	0.998029	0.994319	0.00371	0
ATP5G1	HsaALTA0000807-1/2	0.995859	0.997093	-0.001234	0	0.99285	0.985834	0.007016	0
ATP5G1	HsaALTA0000807-2/2	0.004187	0.002862	0.001325	0	0.007486	0.01303	-0.005544	0
ATP5G1	HsaALTA0000808-1/2	0.018321	0.008384	0.009937	0	0.015067	0.009842	0.005225	0
ATP5G1	HsaALTA0000808-2/2	0.982287	0.99124	-0.008953	0	0.984704	0.989355	-0.004651	0
ATP5G3	HsaALTA0000810-1/4	0.001437	0.000611	0.000826	0	0.001882	0.005117	-0.003236	0
ATP5G3	HsaALTA0000810-2/4	0.00084	0.00062	0.00022	0	0.001131	0.003361	-0.00223	0
ATP5G3	HsaALTA0000810-3/4	0.986488	0.99052	-0.004032	0	0.991077	0.97522	0.015857	0
ATP5G3	HsaALTA0000810-4/4	0.01316	0.009604	0.003556	0	0.008134	0.022381	-0.014247	0
ATP5I	HsaALTA0000811-1/2	0.998518	0.998892	-0.000374	0	0.996263	0.994798	0.001465	0
ATP5I	HsaALTA0000811-2/2	0.001668	0.00113	0.000537	0	0.004106	0.005565	-0.001459	0
ATP5O	HsaALTA0000813-1/5	0.990466	0.989658	0.000808	0	0.976767	0.980497	-0.00373	0
ATP5O	HsaALTA0000813-2/5	0.009964	0.009913	5.1e-05	0	0.018898	0.020174	-0.001276	0
ATP5O	HsaALTA0000813-3/5	0.009594	0.007431	0.002162	0	0.010642	0.010179	0.000464	0
ATP5O	HsaALTA0000813-4/5	0.00973	0.008135	0.001595	0	0.015958	0.010136	0.005822	0
ATP5O	HsaALTA0000813-5/5	0.010385	0.007125	0.003259	0	0.011328	0.00988	0.001448	0
ATP6V0A1	HsaALTA0000815-1/3	0.749373	0.907123	-0.15775	0	NA	NA	NA	NA
ATP6V0A1	HsaALTA0000815-2/3	0.024421	0.030066	-0.005645	0	NA	NA	NA	NA
ATP6V0A1	HsaALTA0000815-3/3	0.237845	0.092028	0.145817	0	NA	NA	NA	NA
ATP6V1A	HsaALTA0000819-1/2	0.007252	0.012916	-0.005664	0	NA	NA	NA	NA
ATP6V1A	HsaALTA0000819-2/2	0.992197	0.988244	0.003953	0	NA	NA	NA	NA
ATP6V1B2	HsaALTA0000820-1/2	0.011139	0.010316	0.000823	0	0.023606	0.013336	0.01027	0
ATP6V1B2	HsaALTA0000820-2/2	0.988423	0.990435	-0.002012	0	0.974251	0.987614	-0.013363	0
ATXN2L	HsaALTA0000833-1/5	0.007435	0.006458	0.000977	0	0.003209	0.014213	-0.011004	0
ATXN2L	HsaALTA0000833-2/5	0.317919	0.278728	0.039191	0	0.36123	0.268052	0.093178	0
ATXN2L	HsaALTA0000833-3/5	0.063129	0.07202	-0.008891	0	0.074508	0.101205	-0.026697	0
ATXN2L	HsaALTA0000833-4/5	0.597813	0.630861	-0.033048	0	0.507507	0.586455	-0.078947	0
ATXN2L	HsaALTA0000833-5/5	0.03225	0.027098	0.005152	0	0.059672	0.068752	-0.00908	0
ATXN3	HsaALTA0000834-1/2	0.042763	0.0231	0.019663	0	0.029693	0.028753	0.00094	0
ATXN3	HsaALTA0000834-2/2	0.95783	0.97581	-0.01798	0	0.971747	0.97137	0.000377	0
ATXN7L3	HsaALTA0000837-1/2	0.929156	0.833104	0.096052	0	NA	NA	NA	NA
ATXN7L3	HsaALTA0000837-2/2	0.071146	0.172404	-0.101259	0	NA	NA	NA	NA
AURKAIP1	HsaALTA0000842-1/2	0.975233	0.95898	0.016253	0	NA	NA	NA	NA
AURKAIP1	HsaALTA0000842-2/2	0.026373	0.044987	-0.018614	0	NA	NA	NA	NA
AXIN1	HsaALTA0000846-1/2	0.990934	0.996446	-0.005512	0	0.993585	0.992952	0.000633	0
AXIN1	HsaALTA0000846-2/2	0.008963	0.003452	0.005511	0	0.006906	0.006876	3.1e-05	0
CEP131	HsaALTA0000848-1/2	0.033804	0.058047	-0.024243	0	0.036514	0.030888	0.005626	0
CEP131	HsaALTA0000848-2/2	0.96774	0.939796	0.027944	0	0.967624	0.968956	-0.001331	0
CEP131	HsaALTA0000849-1/2	NA	NA	NA	NA	0.058022	0.03349	0.024532	0
CEP131	HsaALTA0000849-2/2	NA	NA	NA	NA	0.940678	0.967254	-0.026576	0
AZI2	HsaALTA0000851-1/2	0.544971	0.623569	-0.078598	0	NA	NA	NA	NA
AZI2	HsaALTA0000851-2/2	0.440288	0.377299	0.062989	0	NA	NA	NA	NA
AZIN1	HsaALTA0000852-1/3	0.957503	0.948073	0.009431	0	0.906204	0.987396	-0.081192	0.02
AZIN1	HsaALTA0000852-2/3	0.042064	0.051408	-0.009344	0	0.09063	0.013718	0.076912	0.02
AZIN1	HsaALTA0000852-3/3	0.002818	0.005036	-0.002218	0	0.010299	0.00584	0.004459	0
AZIN1	HsaALTA0000853-1/3	0.025497	0.023735	0.001762	0	NA	NA	NA	NA
AZIN1	HsaALTA0000853-2/3	0.965756	0.960764	0.004992	0	NA	NA	NA	NA
AZIN1	HsaALTA0000853-3/3	0.026629	0.038178	-0.011549	0	NA	NA	NA	NA
B4GALT2	HsaALTA0000859-1/4	0.008318	0.007953	0.000365	0	0.008465	0.042781	-0.034315	0
B4GALT2	HsaALTA0000859-2/4	0.018698	0.008418	0.01028	0	0.009158	0.046255	-0.037097	0
B4GALT2	HsaALTA0000859-3/4	0.008167	0.007745	0.000422	0	0.008868	0.043245	-0.034377	0
B4GALT2	HsaALTA0000859-4/4	0.980464	0.991504	-0.01104	0	0.991406	0.957852	0.033554	0
B4GALT3	HsaALTA0000861-1/2	0.087707	0.054235	0.033472	0	0.102989	0.075086	0.027903	0
B4GALT3	HsaALTA0000861-2/2	0.911733	0.94623	-0.034498	0	0.892007	0.922657	-0.030651	0
B4GALT3	HsaALTA0000862-1/2	0.692844	0.805666	-0.112822	0	0.448123	0.313842	0.13428	0
B4GALT3	HsaALTA0000862-2/2	0.305321	0.190896	0.114426	0	0.554843	0.691672	-0.136829	0
B4GALT7	HsaALTA0000867-1/2	0.899352	0.973516	-0.074164	0	NA	NA	NA	NA
B4GALT7	HsaALTA0000867-2/2	0.096523	0.024311	0.072212	0	NA	NA	NA	NA
B9D1	HsaALTA0000869-1/3	0.943249	0.959532	-0.016283	0	NA	NA	NA	NA
B9D1	HsaALTA0000869-2/3	0.06052	0.03932	0.0212	0.02	NA	NA	NA	NA
B9D1	HsaALTA0000869-3/3	0.056233	0.041174	0.015059	0.01	NA	NA	NA	NA
BACE1	HsaALTA0000870-1/4	0.104345	0.081502	0.022843	0	NA	NA	NA	NA
BACE1	HsaALTA0000870-2/4	0.894504	0.925367	-0.030863	0	NA	NA	NA	NA
BACE1	HsaALTA0000870-3/4	0.024675	0.048245	-0.02357	0	NA	NA	NA	NA
BACE1	HsaALTA0000870-4/4	0.023265	0.047592	-0.024327	0	NA	NA	NA	NA
BAG3	HsaALTA0000873-1/2	0.1796	0.146871	0.03273	0	0.187939	0.257873	-0.069934	0
BAG3	HsaALTA0000873-2/2	0.818238	0.857385	-0.039147	0	0.813068	0.735161	0.077907	0
BAHD1	HsaALTA0000875-1/4	0.050877	0.0525	-0.001624	0	0.024557	0.061156	-0.036599	0
BAHD1	HsaALTA0000875-2/4	0.048267	0.048023	0.000244	0	0.02231	0.055908	-0.033597	0
BAHD1	HsaALTA0000875-3/4	0.343688	0.312818	0.03087	0.03	0.455218	0.387315	0.067903	0
BAHD1	HsaALTA0000875-4/4	0.654568	0.688737	-0.034168	0	0.539803	0.612041	-0.072238	0
BAHD1	HsaALTA0000876-1/2	0.708654	0.693641	0.015013	0	NA	NA	NA	NA
BAHD1	HsaALTA0000876-2/2	0.289721	0.302065	-0.012344	0	NA	NA	NA	NA
BAIAP2L1	HsaALTA0000879-1/2	0.022134	0.037379	-0.015244	0	0.023923	0.027732	-0.003809	0
BAIAP2L1	HsaALTA0000879-2/2	0.979224	0.962834	0.01639	0	0.97499	0.971825	0.003166	0
BAP1	HsaALTA0000884-1/3	0.008824	0.008416	0.000408	0	0.006739	0.01544	-0.008701	0
BAP1	HsaALTA0000884-2/3	0.008032	0.008532	-0.0005	0	0.003845	0.014199	-0.010354	0
BAP1	HsaALTA0000884-3/3	0.991592	0.990756	0.000837	0	0.993371	0.984717	0.008654	0
BAP1	HsaALTA0000885-1/4	0.009538	0.005461	0.004076	0	0.009226	0.00789	0.001337	0
BAP1	HsaALTA0000885-2/4	0.911299	0.932691	-0.021392	0	0.97039	0.978875	-0.008484	0
BAP1	HsaALTA0000885-3/4	0.005494	0.005312	0.000182	0	0.003852	0.00833	-0.004478	0
BAP1	HsaALTA0000885-4/4	0.084594	0.066881	0.017713	0	0.025845	0.014937	0.010908	0
BAP1	HsaALTA0000886-1/7	0.075928	0.078343	-0.002415	0	0.182569	0.180701	0.001867	0
BAP1	HsaALTA0000886-2/7	0.035971	0.015896	0.020075	0	0.055067	0.089335	-0.034268	0.03
BAP1	HsaALTA0000886-3/7	0.88599	0.916956	-0.030966	0	0.781839	0.771628	0.010211	0
BAP1	HsaALTA0000886-4/7	0.011147	0.011059	8.8e-05	0	0.038585	0.038882	-0.000296	0
BAP1	HsaALTA0000886-5/7	0.011937	0.011272	0.000666	0	0.035987	0.036671	-0.000684	0
BAP1	HsaALTA0000886-6/7	0.025724	0.009931	0.015793	0	0.055964	0.040368	0.015595	0
BAP1	HsaALTA0000886-7/7	0.011366	0.011064	0.000301	0	0.037844	0.040098	-0.002254	0
DDX39B	HsaALTA0000889-1/2	0.034018	0.0398	-0.005782	0	0.057985	0.074365	-0.01638	0
DDX39B	HsaALTA0000889-2/2	0.965621	0.959739	0.005882	0	0.941168	0.925374	0.015794	0
PRRC2A	HsaALTA0000892-1/2	0.537275	0.50171	0.035566	0	0.482038	0.43153	0.050508	0
PRRC2A	HsaALTA0000892-2/2	0.462542	0.493125	-0.030583	0	0.512656	0.570396	-0.05774	0
PRRC2A	HsaALTA0000894-1/3	0.037244	0.030886	0.006358	0	0.02681	0.028254	-0.001444	0
PRRC2A	HsaALTA0000894-2/3	0.012075	0.011769	0.000306	0	0.002541	0.015372	-0.012831	0
PRRC2A	HsaALTA0000894-3/3	0.956788	0.963213	-0.006425	0	0.972985	0.973526	-0.000541	0
PRRC2C	HsaALTA0000895-1/5	0.014421	0.021423	-0.007002	0	0.013321	0.030556	-0.017235	0
PRRC2C	HsaALTA0000895-2/5	0.270845	0.278952	-0.008106	0	0.392194	0.421433	-0.02924	0
PRRC2C	HsaALTA0000895-3/5	0.72811	0.713544	0.014566	0	0.608121	0.577553	0.030568	0
PRRC2C	HsaALTA0000895-4/5	0.014673	0.021246	-0.006573	0	0.012626	0.031247	-0.018621	0
PRRC2C	HsaALTA0000895-5/5	0.014207	0.021808	-0.007601	0	0.012677	0.032146	-0.019469	0
PRRC2C	HsaALTA0000896-1/2	0.995343	0.992015	0.003328	0	0.997587	0.99522	0.002367	0
PRRC2C	HsaALTA0000896-2/2	0.004494	0.007158	-0.002664	0	0.002709	0.004492	-0.001783	0
PRRC2B	HsaALTA0000897-1/2	0.289937	0.187546	0.102391	0	0.128634	0.046653	0.081981	0
PRRC2B	HsaALTA0000897-2/2	0.704542	0.816831	-0.112289	0.11	0.870718	0.951916	-0.081198	0.07
PRRC2B	HsaALTA0000898-1/4	0.011912	0.014445	-0.002533	0	NA	NA	NA	NA
PRRC2B	HsaALTA0000898-2/4	0.099963	0.151907	-0.051944	0	NA	NA	NA	NA
PRRC2B	HsaALTA0000898-3/4	0.889951	0.83637	0.053581	0	NA	NA	NA	NA
PRRC2B	HsaALTA0000898-4/4	0.021901	0.023604	-0.001703	0	NA	NA	NA	NA
PRRC2B	HsaALTA0000899-1/2	0.514459	0.513809	0.00065	0	0.571177	0.495792	0.075384	0
PRRC2B	HsaALTA0000899-2/2	0.479923	0.484747	-0.004824	0	0.430353	0.511185	-0.080832	0
PRRC2B	HsaALTA0000900-1/2	0.91929	0.967245	-0.047956	0	0.967787	0.962437	0.005351	0
PRRC2B	HsaALTA0000900-2/2	0.080521	0.032604	0.047916	0	0.032265	0.036214	-0.003949	0.01
BAG6	HsaALTA0000901-1/2	0.998398	0.998302	9.6e-05	0	0.994682	0.975097	0.019585	0
BAG6	HsaALTA0000901-2/2	0.001621	0.001808	-0.000187	0	0.005536	0.023881	-0.018345	0
BAG6	HsaALTA0000902-1/4	0.992466	0.993626	-0.001159	0	0.993094	0.996401	-0.003307	0
BAG6	HsaALTA0000902-2/4	0.007617	0.00673	0.000886	0	0.007469	0.00367	0.0038	0
BAG6	HsaALTA0000902-3/4	0.002418	0.002766	-0.000348	0	0.002331	0.004051	-0.00172	0
BAG6	HsaALTA0000902-4/4	0.002404	0.002613	-0.000209	0	0.002418	0.003939	-0.001521	0
BAG6	HsaALTA0000903-1/2	0.989254	0.983064	0.00619	0	0.992574	0.993371	-0.000797	0
BAG6	HsaALTA0000903-2/2	0.010264	0.016443	-0.006179	0	0.007896	0.006154	0.001742	0
BAG6	HsaALTA0000904-1/2	0.165381	0.155004	0.010377	0	0.124968	0.174284	-0.049316	0.05
BAG6	HsaALTA0000904-2/2	0.838627	0.843459	-0.004832	0	0.879857	0.8243	0.055557	0
BAG6	HsaALTA0000905-1/3	0.001901	0.002031	-0.00013	0	0.00632	0.009339	-0.00302	0
BAG6	HsaALTA0000905-2/3	0.998284	0.998072	0.000212	0	0.993698	0.9908	0.002899	0
BAG6	HsaALTA0000905-3/3	0.00172	0.00212	-0.0004	0	0.006093	0.00954	-0.003446	0
BAG6	HsaALTA0000906-1/3	0.002496	0.003783	-0.001287	0	0.008781	0.014562	-0.005781	0
BAG6	HsaALTA0000906-2/3	0.002735	0.003674	-0.00094	0	0.009008	0.015255	-0.006247	0
BAG6	HsaALTA0000906-3/3	0.997371	0.99627	0.001101	0	0.991723	0.985166	0.006557	0
GPANK1	HsaALTA0000908-1/2	0.595182	0.458673	0.136509	0	0.429299	0.526836	-0.097537	0
GPANK1	HsaALTA0000908-2/2	0.406147	0.539354	-0.133207	0	0.565242	0.473167	0.092075	0
BAX	HsaALTA0000909-1/6	0.0043	0.004128	0.000171	0	0.01321	0.016632	-0.003422	0
BAX	HsaALTA0000909-2/6	0.774132	0.831114	-0.056982	0	0.818259	0.845108	-0.026849	0.03
BAX	HsaALTA0000909-3/6	0.216185	0.165684	0.050501	0	0.171802	0.155681	0.016121	0
BAX	HsaALTA0000909-4/6	0.003981	0.004173	-0.000192	0	0.013113	0.015552	-0.00244	0
BAX	HsaALTA0000909-5/6	0.00944	0.007043	0.002397	0	0.020883	0.014851	0.006032	0
BAX	HsaALTA0000909-6/6	0.004081	0.004208	-0.000127	0	0.012557	0.016598	-0.004041	0
BAZ2A	HsaALTA0000913-1/3	0.003983	0.007346	-0.003363	0	0.006425	0.014967	-0.008542	0
BAZ2A	HsaALTA0000913-2/3	0.114317	0.092473	0.021844	0	0.124125	0.12715	-0.003026	0
BAZ2A	HsaALTA0000913-3/3	0.88513	0.906714	-0.021584	0	0.877811	0.868371	0.00944	0
BAZ2B	HsaALTA0000914-1/3	0.241733	0.100449	0.141284	0	0.220629	0.134678	0.085951	0
BAZ2B	HsaALTA0000914-2/3	0.750352	0.89582	-0.145468	0	0.779686	0.863273	-0.083587	0
BAZ2B	HsaALTA0000914-3/3	0.02898	0.064818	-0.035838	0	0.027414	0.05002	-0.022606	0
BBX	HsaALTA0000918-1/2	0.070811	0.021146	0.049664	0	0.006102	0.008222	-0.00212	0
BBX	HsaALTA0000918-2/2	0.928382	0.978904	-0.050522	0	0.993844	0.992245	0.001599	0
BBX	HsaALTA0000918-2/3	0.012057	0.024106	-0.012048	0	0.005699	0.008406	-0.002707	0
BCAP29	HsaALTA0000921-1/2	0.019544	0.018461	0.001084	0	0.033803	0.02189	0.011913	0
BCAP29	HsaALTA0000921-2/2	0.982343	0.978825	0.003517	0	0.964539	0.976327	-0.011787	0
BCL2L1	HsaALTA0000926-1/2	0.752809	0.569476	0.183333	0.11	0.734292	0.844395	-0.110103	0.02
BCL2L1	HsaALTA0000926-2/2	0.24783	0.428702	-0.180873	0.11	0.265004	0.157937	0.107067	0.02
BCL2L12	HsaALTA0000927-1/5	0.071216	0.097903	-0.026687	0	0.07116	0.099481	-0.02832	0.03
BCL2L12	HsaALTA0000927-2/5	0.928315	0.89733	0.030985	0	0.923038	0.897318	0.025721	0
BCL2L12	HsaALTA0000927-3/5	0.042495	0.030279	0.012216	0	0.030808	0.032449	-0.001641	0
BCL2L12	HsaALTA0000927-4/5	0.040588	0.031529	0.009059	0	0.027849	0.032117	-0.004267	0
BCL2L12	HsaALTA0000927-5/5	0.043665	0.033145	0.01052	0	0.038812	0.035748	0.003064	0
BCL6	HsaALTA0000929-1/5	0.013725	0.018327	-0.004602	0	NA	NA	NA	NA
BCL6	HsaALTA0000929-2/5	0.974787	0.981896	-0.007109	0	NA	NA	NA	NA
BCL6	HsaALTA0000929-3/5	0.014703	0.018538	-0.003835	0	NA	NA	NA	NA
BCL6	HsaALTA0000929-4/5	0.014698	0.018796	-0.004097	0	NA	NA	NA	NA
BCL6	HsaALTA0000929-5/5	0.023116	0.021244	0.001871	0	NA	NA	NA	NA
BCL6	HsaALTA0000930-1/3	0.002732	0.008232	-0.005501	0	0.032288	0.044259	-0.011971	0
BCL6	HsaALTA0000930-2/3	0.002728	0.004737	-0.002009	0	0.021448	0.037961	-0.016513	0
BCL6	HsaALTA0000930-3/3	0.997303	0.991956	0.005346	0	0.967238	0.960107	0.007131	0
BCL7B	HsaALTA0000931-1/3	0.938193	0.939269	-0.001076	0	NA	NA	NA	NA
BCL7B	HsaALTA0000931-2/3	0.058879	0.060923	-0.002043	0	NA	NA	NA	NA
BCL7B	HsaALTA0000931-3/3	0.019984	0.019108	0.000877	0	NA	NA	NA	NA
BCLAF1	HsaALTA0000933-1/2	0.039485	0.045584	-0.006099	0	0.038944	0.037952	0.000992	0
BCLAF1	HsaALTA0000933-2/2	0.963606	0.954807	0.008799	0	0.960965	0.966704	-0.005739	0
BCOR	HsaALTA0000934-1/4	0.010644	0.010614	2.9e-05	0	0.039444	0.014262	0.025181	0
BCOR	HsaALTA0000934-2/4	0.481918	0.51985	-0.037931	0	0.448145	0.532924	-0.084779	0
BCOR	HsaALTA0000934-3/4	0.513407	0.48163	0.031777	0	0.521414	0.465726	0.055688	0
BCOR	HsaALTA0000934-4/4	0.009694	0.011771	-0.002077	0	0.016128	0.013916	0.002212	0
BCR	HsaALTA0000935-1/2	0.986921	0.988801	-0.00188	0	0.992197	0.987172	0.005025	0
BCR	HsaALTA0000935-2/2	0.012503	0.011849	0.000654	0	0.007297	0.011935	-0.004639	0
BCS1L	HsaALTA0000938-1/3	0.09255	0.095688	-0.003137	0	0.145938	0.035766	0.110172	0
BCS1L	HsaALTA0000938-2/3	0.911367	0.902166	0.009201	0	0.855099	0.965256	-0.110157	0.1
BCS1L	HsaALTA0000938-3/3	0.027544	0.024319	0.003225	0	0.038964	0.033736	0.005227	0
BCS1L	HsaALTA0000939-1/2	0.039021	0.022141	0.01688	0	NA	NA	NA	NA
BCS1L	HsaALTA0000939-2/2	0.963529	0.976642	-0.013113	0	NA	NA	NA	NA
BEND7	HsaALTA0000943-1/2	0.618934	0.581581	0.037352	0	0.483167	0.596313	-0.113146	0
BEND7	HsaALTA0000943-2/2	0.370399	0.416807	-0.046408	0	0.513294	0.404343	0.108951	0
BHLHE40	HsaALTA0000947-1/4	0.997509	0.997375	0.000134	0	0.982666	0.992608	-0.009942	0
BHLHE40	HsaALTA0000947-2/4	0.00242	0.002652	-0.000233	0	0.017321	0.007239	0.010082	0
BHLHE40	HsaALTA0000947-3/4	0.002109	0.002603	-0.000494	0	0.018159	0.007402	0.010758	0
BHLHE40	HsaALTA0000947-4/4	0.00223	0.002711	-0.00048	0	0.017697	0.006852	0.010845	0
BMPR2	HsaALTA0000956-1/4	0.0178	0.02051	-0.00271	0	0.01322	0.040803	-0.027583	0
BMPR2	HsaALTA0000956-2/4	0.01795	0.021564	-0.003613	0	0.013337	0.040329	-0.026992	0
BMPR2	HsaALTA0000956-3/4	0.019381	0.019935	-0.000554	0	0.013947	0.041828	-0.027881	0
BMPR2	HsaALTA0000956-4/4	0.982358	0.979752	0.002606	0	0.986761	0.955073	0.031688	0
BOP1	HsaALTA0000966-1/2	0.042867	0.048659	-0.005793	0	NA	NA	NA	NA
BOP1	HsaALTA0000966-2/2	0.959137	0.945599	0.013539	0	NA	NA	NA	NA
BPTF	HsaALTA0000968-1/3	0.079735	0.051246	0.028489	0	0.061387	0.056402	0.004985	0
BPTF	HsaALTA0000968-2/3	0.918442	0.952061	-0.033618	0	0.936848	0.945528	-0.00868	0
BPTF	HsaALTA0000968-3/3	0.016888	0.022971	-0.006084	0	0.005915	0.008071	-0.002156	0
BRCA1	HsaALTA0000969-1/2	NA	NA	NA	NA	0.332476	0.09328	0.239197	0
BRCA1	HsaALTA0000969-2/2	NA	NA	NA	NA	0.661216	0.908048	-0.246832	0.24
BRCA1	HsaALTA0000970-1/2	0.32074	0.110912	0.209828	0	0.457683	0.266756	0.190927	0
BRCA1	HsaALTA0000970-2/2	0.676004	0.880496	-0.204492	0.2	0.544619	0.726264	-0.181645	0
BRCC3	HsaALTA0000973-1/2	NA	NA	NA	NA	0.97622	0.971219	0.005001	0
BRCC3	HsaALTA0000973-2/2	NA	NA	NA	NA	0.024013	0.026811	-0.002798	0
BRD1	HsaALTA0000975-1/3	NA	NA	NA	NA	0.957023	0.939518	0.017506	0.01
BRD1	HsaALTA0000975-2/3	NA	NA	NA	NA	0.043141	0.064145	-0.021004	0
BRD1	HsaALTA0000975-3/3	NA	NA	NA	NA	0.038654	0.060497	-0.021843	0
BRD1	HsaALTA0000976-1/3	0.981725	0.975948	0.005777	0	0.971461	0.98097	-0.009508	0
BRD1	HsaALTA0000976-2/3	0.019105	0.025324	-0.006219	0	0.029149	0.019345	0.009804	0
BRD1	HsaALTA0000976-3/3	0.018093	0.025664	-0.007571	0	0.028273	0.020005	0.008268	0
BRD1	HsaALTA0000977-1/2	0.072001	0.042943	0.029058	0	0.099909	0.031854	0.068055	0
BRD1	HsaALTA0000977-2/2	0.922186	0.957898	-0.035711	0	0.905767	0.964572	-0.058805	0
BRD2	HsaALTA0000978-1/3	0.00495	0.004953	-4e-06	0	0.000922	0.00462	-0.003698	0
BRD2	HsaALTA0000978-2/3	0.014435	0.005278	0.009157	0	0.002032	0.016635	-0.014603	0
BRD2	HsaALTA0000978-3/3	0.985422	0.994849	-0.009427	0	0.997946	0.983616	0.01433	0
BRD2	HsaALTA0000979-1/5	0.003556	0.003681	-0.000126	0	0.003891	0.007912	-0.00402	0
BRD2	HsaALTA0000979-2/5	0.961702	0.964914	-0.003212	0	0.826505	0.854701	-0.028196	0
BRD2	HsaALTA0000979-3/5	0.003273	0.006224	-0.002951	0	0.014532	0.007996	0.006535	0
BRD2	HsaALTA0000979-4/5	0.003447	0.003725	-0.000278	0	0.003604	0.00523	-0.001626	0
BRD2	HsaALTA0000979-5/5	0.040115	0.032715	0.0074	0	0.158982	0.123519	0.035463	0
BRD2	HsaALTA0000980-1/2	0.002595	0.002748	-0.000153	0	0.007193	0.003765	0.003428	0
BRD2	HsaALTA0000980-2/2	0.997494	0.997495	-1e-06	0	0.992736	0.99593	-0.003194	0
BRD7	HsaALTA0000983-1/2	0.552739	0.671272	-0.118533	0.01	0.637147	0.586011	0.051136	0
BRD7	HsaALTA0000983-2/2	0.44553	0.329941	0.115588	0.01	0.362801	0.415839	-0.053039	0
BRD8	HsaALTA0000984-1/4	0.056631	0.102631	-0.046	0	0.006836	0.03949	-0.032654	0
BRD8	HsaALTA0000984-2/4	0.026402	0.02207	0.004333	0	0.017583	0.058854	-0.04127	0
BRD8	HsaALTA0000984-3/4	0.022535	0.025487	-0.002952	0	0.011647	0.024099	-0.012453	0
BRD8	HsaALTA0000984-4/4	0.943773	0.897734	0.046038	0	0.976004	0.926431	0.049573	0
BRD9	HsaALTA0000988-1/3	0.704611	0.724592	-0.01998	0	0.563031	0.695609	-0.132579	0
BRD9	HsaALTA0000988-2/3	0.302344	0.2758	0.026544	0	0.447643	0.309705	0.137939	0
BRD9	HsaALTA0000988-3/3	0.018118	0.034299	-0.016181	0	0.02717	0.056076	-0.028906	0
BRD9	HsaALTA0000989-1/3	0.037887	0.041086	-0.003199	0	NA	NA	NA	NA
BRD9	HsaALTA0000989-2/3	0.963396	0.955986	0.00741	0	NA	NA	NA	NA
BRD9	HsaALTA0000989-3/3	0.023143	0.041834	-0.018691	0	NA	NA	NA	NA
BRF1	HsaALTA0000991-1/2	0.911455	0.949489	-0.038034	0.04	0.985256	0.991497	-0.006241	0
BRF1	HsaALTA0000991-2/2	0.090754	0.054974	0.03578	0	0.014075	0.009624	0.004451	0
BRMS1	HsaALTA0000993-1/3	0.028534	0.021506	0.007028	0	0.055731	0.036329	0.019402	0
BRMS1	HsaALTA0000993-2/3	0.956736	0.980245	-0.02351	0	0.942339	0.964864	-0.022525	0
BRMS1	HsaALTA0000993-3/3	0.043824	0.018741	0.025083	0	0.033898	0.035996	-0.002098	0
BRMS1	HsaALTA0000994-1/4	0.140922	0.035312	0.10561	0	NA	NA	NA	NA
BRMS1	HsaALTA0000994-2/4	0.063486	0.03415	0.029336	0	NA	NA	NA	NA
BRMS1	HsaALTA0000994-3/4	0.8614	0.970428	-0.109028	0.1	NA	NA	NA	NA
BRMS1	HsaALTA0000994-4/4	0.064779	0.032399	0.03238	0	NA	NA	NA	NA
BRWD1	HsaALTA0000998-1/3	0.02627	0.044814	-0.018545	0	0.045646	0.050944	-0.005299	0
BRWD1	HsaALTA0000998-2/3	0.026006	0.044635	-0.018629	0	0.047296	0.089262	-0.041965	0
BRWD1	HsaALTA0000998-3/3	0.97273	0.952703	0.020027	0	0.952457	0.914266	0.038191	0
BSCL2	HsaALTA0001001-1/2	0.962973	0.974621	-0.011648	0	NA	NA	NA	NA
BSCL2	HsaALTA0001001-2/2	0.037112	0.026079	0.011033	0	NA	NA	NA	NA
BSDC1	HsaALTA0001002-1/4	0.855321	0.849766	0.005556	0	0.906348	0.847279	0.059068	0
BSDC1	HsaALTA0001002-2/4	0.135747	0.143871	-0.008124	0	0.08161	0.085827	-0.004216	0
BSDC1	HsaALTA0001002-3/4	0.012937	0.013426	-0.000489	0	0.027354	0.076687	-0.049333	0
BSDC1	HsaALTA0001002-4/4	0.005213	0.008789	-0.003576	0	0.01713	0.032703	-0.015574	0
BTBD1	HsaALTA0001003-1/2	0.005183	0.005709	-0.000526	0	0.005289	0.006791	-0.001502	0
BTBD1	HsaALTA0001003-2/2	0.99529	0.994089	0.0012	0	0.994684	0.993918	0.000766	0
BTN2A2	HsaALTA0001007-1/2	0.947619	0.940284	0.007335	0	0.980443	0.956877	0.023566	0
BTN2A2	HsaALTA0001007-2/2	0.048603	0.060029	-0.011425	0	0.019291	0.04198	-0.022688	0
BTN3A1	HsaALTA0001009-1/4	0.021082	0.021907	-0.000825	0	NA	NA	NA	NA
BTN3A1	HsaALTA0001009-2/4	0.011821	0.018237	-0.006416	0	NA	NA	NA	NA
BTN3A1	HsaALTA0001009-3/4	0.979932	0.966057	0.013876	0	NA	NA	NA	NA
BTN3A1	HsaALTA0001009-4/4	0.012877	0.033516	-0.020639	0	NA	NA	NA	NA
BTN3A3	HsaALTA0001012-1/2	0.910715	0.813051	0.097664	0	0.737856	0.94337	-0.205514	0.19
BTN3A3	HsaALTA0001012-2/2	0.089738	0.182022	-0.092284	0	0.2605	0.053268	0.207232	0
BTRC	HsaALTA0001013-1/2	0.967738	0.960239	0.007498	0	0.978452	0.967946	0.010506	0
BTRC	HsaALTA0001013-2/2	0.029608	0.040006	-0.010398	0	0.020673	0.028904	-0.008231	0
BUB1	HsaALTA0001014-1/2	0.981777	0.987254	-0.005477	0	0.99701	0.994402	0.002608	0
BUB1	HsaALTA0001014-2/2	0.017875	0.013443	0.004432	0	0.002773	0.005863	-0.00309	0
BUB1	HsaALTA0001015-1/3	0.016947	0.012845	0.004102	0	0.016032	0.01962	-0.003589	0
BUB1	HsaALTA0001015-2/3	0.982348	0.986613	-0.004265	0	0.983837	0.980476	0.003361	0
BUB1	HsaALTA0001015-3/3	0.016657	0.015948	0.000709	0	0.016568	0.018093	-0.001525	0
BUB1B	HsaALTA0001016-1/3	0.030678	0.078557	-0.04788	0	0.01238	0.05669	-0.04431	0
BUB1B	HsaALTA0001016-2/3	0.953075	0.895904	0.057171	0	0.963279	0.871773	0.091505	0
BUB1B	HsaALTA0001016-3/3	0.043499	0.045495	-0.001996	0	0.03649	0.09145	-0.05496	0
BUB3	HsaALTA0001017-1/2	0.004328	0.00409	0.000238	0	0.006895	0.004279	0.002616	0
BUB3	HsaALTA0001017-2/2	0.995615	0.995822	-0.000208	0	0.99363	0.995683	-0.002054	0
BUD31	HsaALTA0001018-1/4	0.008941	0.006489	0.002452	0	0.006646	0.007764	-0.001117	0
BUD31	HsaALTA0001018-2/4	0.047107	0.069123	-0.022015	0	0.077218	0.055997	0.021221	0
BUD31	HsaALTA0001018-3/4	0.953853	0.928652	0.025201	0	0.923794	0.945218	-0.021424	0
BUD31	HsaALTA0001018-4/4	0.008464	0.00624	0.002224	0	0.006452	0.007982	-0.001531	0
BYSL	HsaALTA0001019-1/2	0.991539	0.986611	0.004928	0	NA	NA	NA	NA
BYSL	HsaALTA0001019-2/2	0.008721	0.01265	-0.003928	0	NA	NA	NA	NA
BZW2	HsaALTA0001020-1/4	0.025188	0.009041	0.016147	0	0.009133	0.018451	-0.009318	0
BZW2	HsaALTA0001020-2/4	0.042793	0.016074	0.026719	0	0.009322	0.0201	-0.010778	0
BZW2	HsaALTA0001020-3/4	0.933816	0.983324	-0.049508	0	0.991357	0.981763	0.009594	0
BZW2	HsaALTA0001020-4/4	0.018208	0.010327	0.007881	0	0.009462	0.017623	-0.008161	0
FUOM	HsaALTA0001022-1/2	0.925323	0.928351	-0.003027	0	NA	NA	NA	NA
FUOM	HsaALTA0001022-2/2	0.070321	0.069396	0.000925	0	NA	NA	NA	NA
FUOM	HsaALTA0001023-1/2	0.829092	0.855549	-0.026456	0	NA	NA	NA	NA
FUOM	HsaALTA0001023-2/2	0.171685	0.142341	0.029344	0	NA	NA	NA	NA
EDRF1	HsaALTA0001025-1/2	0.942823	0.945336	-0.002514	0	NA	NA	NA	NA
EDRF1	HsaALTA0001025-2/2	0.062299	0.054145	0.008154	0	NA	NA	NA	NA
TWNK	HsaALTA0001026-1/2	0.173012	0.129514	0.043499	0	0.090978	0.159411	-0.068433	0
TWNK	HsaALTA0001026-2/2	0.824712	0.877536	-0.052825	0	0.90755	0.844568	0.062983	0
FAM204A	HsaALTA0001029-1/2	0.069755	0.047144	0.022611	0	0.083892	0.034036	0.049856	0
FAM204A	HsaALTA0001029-2/2	0.928081	0.951718	-0.023636	0	0.912537	0.966922	-0.054384	0
C10orf88	HsaALTA0001030-1/2	0.112925	0.05028	0.062645	0	NA	NA	NA	NA
C10orf88	HsaALTA0001030-2/2	0.888303	0.946086	-0.057782	0.05	NA	NA	NA	NA
C10orf88	HsaALTA0001031-1/2	0.051086	0.065895	-0.014809	0	NA	NA	NA	NA
C10orf88	HsaALTA0001031-2/2	0.948369	0.934366	0.014003	0	NA	NA	NA	NA
TMEM258	HsaALTA0001035-1/4	0.002744	0.001913	0.00083	0	0.010533	0.025782	-0.015249	0
TMEM258	HsaALTA0001035-2/4	0.979962	0.987141	-0.007179	0	0.923178	0.897622	0.025556	0
TMEM258	HsaALTA0001035-3/4	0.002736	0.001967	0.000769	0	0.011644	0.027116	-0.015471	0
TMEM258	HsaALTA0001035-4/4	0.020217	0.013075	0.007143	0	0.079759	0.085443	-0.005684	0
C11orf24	HsaALTA0001037-1/2	0.996224	0.987515	0.008709	0	0.988152	0.958661	0.029491	0
C11orf24	HsaALTA0001037-2/2	0.003381	0.011876	-0.008495	0	0.011096	0.043019	-0.031924	0.03
EMSY	HsaALTA0001038-1/2	NA	NA	NA	NA	0.120463	0.0385	0.081963	0
EMSY	HsaALTA0001038-2/2	NA	NA	NA	NA	0.87791	0.954155	-0.076245	0.07
EMSY	HsaALTA0001039-1/3	0.03305	0.056398	-0.023348	0	0.017222	0.021788	-0.004566	0
EMSY	HsaALTA0001039-2/3	0.965077	0.943339	0.021737	0	0.981742	0.975114	0.006628	0
EMSY	HsaALTA0001039-3/3	0.0315	0.051049	-0.019549	0	0.018785	0.022785	-0.004	0
C11orf49	HsaALTA0001045-1/2	0.872672	0.84083	0.031842	0	NA	NA	NA	NA
C11orf49	HsaALTA0001045-2/2	0.132037	0.163497	-0.03146	0	NA	NA	NA	NA
C11orf57	HsaALTA0001046-1/3	0.109355	0.147722	-0.038367	0	0.117168	0.212712	-0.095544	0
C11orf57	HsaALTA0001046-2/3	0.892841	0.846716	0.046124	0	0.883635	0.792724	0.090911	0
C11orf57	HsaALTA0001046-3/3	0.024309	0.017124	0.007185	0	0.007609	0.015864	-0.008256	0
C11orf68	HsaALTA0001050-1/7	0.605486	0.734303	-0.128817	0	NA	NA	NA	NA
C11orf68	HsaALTA0001050-2/7	0.388549	0.265568	0.122981	0	NA	NA	NA	NA
C11orf68	HsaALTA0001050-3/7	0.048775	0.045991	0.002784	0	NA	NA	NA	NA
C11orf68	HsaALTA0001050-4/7	0.048051	0.048103	-5.2e-05	0	NA	NA	NA	NA
C11orf68	HsaALTA0001050-5/7	0.048459	0.044886	0.003573	0	NA	NA	NA	NA
C11orf68	HsaALTA0001050-6/7	0.050978	0.049127	0.001851	0	NA	NA	NA	NA
C11orf68	HsaALTA0001050-7/7	0.048715	0.050584	-0.001869	0	NA	NA	NA	NA
MYRF	HsaALTA0001055-1/2	0.584634	0.625848	-0.041213	0	0.558099	0.716041	-0.157942	0
MYRF	HsaALTA0001055-2/2	0.418419	0.374767	0.043652	0	0.437014	0.27206	0.164954	0
MYRF	HsaALTA0001056-1/2	0.735135	0.8688	-0.133665	0	NA	NA	NA	NA
MYRF	HsaALTA0001056-2/2	0.263749	0.134114	0.129635	0	NA	NA	NA	NA
INTS13	HsaALTA0001057-1/3	0.032882	0.041514	-0.008632	0	NA	NA	NA	NA
INTS13	HsaALTA0001057-2/3	0.030845	0.047108	-0.016263	0	NA	NA	NA	NA
INTS13	HsaALTA0001057-3/3	0.967905	0.955873	0.012032	0	NA	NA	NA	NA
C12orf43	HsaALTA0001062-1/3	NA	NA	NA	NA	0.239225	0.624434	-0.38521	0.01
C12orf43	HsaALTA0001062-2/3	NA	NA	NA	NA	0.739303	0.373401	0.365902	0
C12orf43	HsaALTA0001062-3/3	NA	NA	NA	NA	0.03934	0.0596	-0.020259	0
C12orf57	HsaALTA0001064-1/2	0.971248	0.982407	-0.011159	0	0.941164	0.925081	0.016084	0
C12orf57	HsaALTA0001064-2/2	0.027791	0.017301	0.010491	0	0.062469	0.069496	-0.007028	0.01
PCNX4	HsaALTA0001070-1/2	0.021073	0.026926	-0.005853	0	0.024876	0.068284	-0.043408	0
PCNX4	HsaALTA0001070-2/2	0.976697	0.975516	0.001181	0	0.975138	0.933365	0.041772	0
C14orf159	HsaALTA0001075-1/2	0.038147	0.03234	0.005807	0	0.032888	0.033422	-0.000534	0
C14orf159	HsaALTA0001075-2/2	0.962284	0.970273	-0.007989	0	0.968795	0.963144	0.005651	0
C14orf93	HsaALTA0001079-1/3	0.65003	0.628041	0.02199	0	NA	NA	NA	NA
C14orf93	HsaALTA0001079-2/3	0.354631	0.374078	-0.019447	0	NA	NA	NA	NA
C14orf93	HsaALTA0001079-3/3	0.0448	0.036133	0.008667	0	NA	NA	NA	NA
KNSTRN	HsaALTA0001082-1/2	0.025665	0.025134	0.000531	0	0.019546	0.023422	-0.003877	0
KNSTRN	HsaALTA0001082-2/2	0.979045	0.973647	0.005398	0	0.981152	0.977156	0.003997	0
KNSTRN	HsaALTA0001083-1/2	0.976246	0.982608	-0.006363	0	0.987224	0.991057	-0.003833	0
KNSTRN	HsaALTA0001083-2/2	0.021199	0.019679	0.001519	0	0.012901	0.008703	0.004198	0
INTS14	HsaALTA0001084-1/2	0.103425	0.085166	0.018259	0	0.047197	0.092186	-0.04499	0
INTS14	HsaALTA0001084-2/2	0.898176	0.910492	-0.012316	0	0.952322	0.910657	0.041664	0
NPRL3	HsaALTA0001087-1/3	0.014789	0.013862	0.000927	0	NA	NA	NA	NA
NPRL3	HsaALTA0001087-2/3	0.985166	0.97784	0.007327	0	NA	NA	NA	NA
NPRL3	HsaALTA0001087-3/3	0.01568	0.023243	-0.007562	0	NA	NA	NA	NA
TSR3	HsaALTA0001089-1/3	0.020422	0.025304	-0.004881	0	0.018679	0.022804	-0.004125	0
TSR3	HsaALTA0001089-2/3	0.020716	0.026738	-0.006021	0	0.018235	0.020027	-0.001792	0
TSR3	HsaALTA0001089-3/3	0.979417	0.974494	0.004923	0	0.983403	0.975382	0.008021	0
CDIP1	HsaALTA0001090-1/3	0.027253	0.026073	0.001181	0	0.006887	0.053094	-0.046207	0
CDIP1	HsaALTA0001090-2/3	0.024819	0.016502	0.008317	0	0.006234	0.053685	-0.047451	0
CDIP1	HsaALTA0001090-3/3	0.975462	0.974675	0.000787	0	0.99339	0.945226	0.048165	0
C16orf58	HsaALTA0001091-1/3	0.016442	0.041033	-0.024591	0	0.017972	0.010514	0.007458	0
C16orf58	HsaALTA0001091-2/3	0.968087	0.940132	0.027955	0	0.955837	0.97513	-0.019293	0
C16orf58	HsaALTA0001091-3/3	0.019474	0.025739	-0.006264	0	0.030795	0.025334	0.005461	0
VPS9D1	HsaALTA0001099-1/2	0.089734	0.119145	-0.029411	0	0.054345	0.051635	0.00271	0
VPS9D1	HsaALTA0001099-2/2	0.905063	0.884249	0.020814	0	0.947497	0.949944	-0.002447	0
C16orf89	HsaALTA0001101-1/2	0.887684	0.857684	0.03	0	NA	NA	NA	NA
C16orf89	HsaALTA0001101-2/2	0.111193	0.150486	-0.039293	0	NA	NA	NA	NA
C17orf49	HsaALTA0001105-1/2	0.678955	0.687497	-0.008542	0	0.636701	0.507724	0.128977	0
C17orf49	HsaALTA0001105-2/2	0.319613	0.310723	0.00889	0	0.362056	0.480306	-0.11825	0
C17orf53	HsaALTA0001106-1/2	NA	NA	NA	NA	0.94299	0.958484	-0.015494	0.01
C17orf53	HsaALTA0001106-2/2	NA	NA	NA	NA	0.05659	0.040655	0.015935	0
C17orf62	HsaALTA0001108-1/2	0.977645	0.980629	-0.002984	0	NA	NA	NA	NA
C17orf62	HsaALTA0001108-2/2	0.022192	0.019332	0.002859	0	NA	NA	NA	NA
C17orf62	HsaALTA0001109-4/5	0.014581	0.012594	0.001987	0	0.028703	0.035895	-0.007192	0
C17orf62	HsaALTA0001109-5/5	0.014201	0.01233	0.00187	0	0.031037	0.036856	-0.00582	0
FAAP100	HsaALTA0001112-1/4	0.029663	0.032715	-0.003051	0	0.018726	0.030847	-0.012121	0
FAAP100	HsaALTA0001112-2/4	0.029965	0.028808	0.001157	0	0.018678	0.047714	-0.029036	0
FAAP100	HsaALTA0001112-3/4	0.029851	0.030548	-0.000697	0	0.028354	0.029582	-0.001228	0
FAAP100	HsaALTA0001112-4/4	0.969476	0.9699	-0.000425	0	0.970406	0.949117	0.021289	0
LDLRAD4	HsaALTA0001115-1/2	0.958063	0.951285	0.006777	0	NA	NA	NA	NA
LDLRAD4	HsaALTA0001115-2/2	0.042523	0.049345	-0.006822	0	NA	NA	NA	NA
URI1	HsaALTA0001119-1/2	0.005318	0.005894	-0.000575	0	0.006559	0.00808	-0.001521	0
URI1	HsaALTA0001119-2/2	0.994904	0.994705	0.0002	0	0.993219	0.99194	0.001279	0
MFSD12	HsaALTA0001122-1/2	0.013311	0.011641	0.00167	0	NA	NA	NA	NA
MFSD12	HsaALTA0001122-2/2	0.986955	0.987555	-0.0006	0	NA	NA	NA	NA
SYNE4	HsaALTA0001124-1/2	0.018725	0.015771	0.002954	0	NA	NA	NA	NA
SYNE4	HsaALTA0001124-2/2	0.983056	0.984094	-0.001038	0	NA	NA	NA	NA
C19orf54	HsaALTA0001133-1/2	0.37877	0.357406	0.021364	0	0.49172	0.274724	0.216996	0
C19orf54	HsaALTA0001133-2/2	0.624531	0.652644	-0.028113	0	0.510247	0.714405	-0.204157	0.2
TMEM259	HsaALTA0001138-1/3	0.221741	0.171209	0.050532	0	0.319336	0.331346	-0.012009	0
TMEM259	HsaALTA0001138-2/3	0.006175	0.005739	0.000435	0	0.013316	0.024124	-0.010808	0
TMEM259	HsaALTA0001138-3/3	0.775074	0.827164	-0.05209	0	0.676745	0.653778	0.022967	0
C1D	HsaALTA0001145-1/2	0.974928	0.965831	0.009097	0	0.961976	0.944907	0.01707	0
C1D	HsaALTA0001145-2/2	0.024613	0.032681	-0.008068	0	0.039117	0.057874	-0.018757	0.02
C1D	HsaALTA0001146-1/3	0.163294	0.089528	0.073766	0	0.08279	0.035313	0.047476	0
C1D	HsaALTA0001146-2/3	0.808959	0.901062	-0.092103	0	0.924169	0.965401	-0.041232	0
C1D	HsaALTA0001146-3/3	0.033226	0.015137	0.018088	0	0.049249	0.034947	0.014302	0
C1QBP	HsaALTA0001149-1/2	0.001901	0.001451	0.000451	0	0.00177	0.002493	-0.000724	0
C1QBP	HsaALTA0001149-2/2	0.998231	0.998459	-0.000228	0	0.998267	0.997427	0.00084	0
C1QTNF6	HsaALTA0001151-1/2	0.054542	0.049675	0.004867	0	NA	NA	NA	NA
C1QTNF6	HsaALTA0001151-2/2	0.947119	0.9529	-0.005781	0	NA	NA	NA	NA
C1S	HsaALTA0001152-1/2	0.013868	0.016627	-0.002759	0	0.020372	0.018061	0.002311	0
C1S	HsaALTA0001152-2/2	0.985755	0.984527	0.001228	0	0.9779	0.980963	-0.003063	0
C1orf109	HsaALTA0001155-1/4	0.800552	0.781169	0.019383	0	0.78629	0.783826	0.002463	0
C1orf109	HsaALTA0001155-2/4	0.195554	0.217452	-0.021898	0	0.192639	0.213402	-0.020763	0
C1orf109	HsaALTA0001155-3/4	0.03338	0.034423	-0.001044	0	0.019735	0.027208	-0.007473	0
C1orf109	HsaALTA0001155-4/4	0.035822	0.032742	0.00308	0	0.034459	0.02827	0.006189	0
C1orf109	HsaALTA0001156-1/2	0.803302	0.695996	0.107306	0	NA	NA	NA	NA
C1orf109	HsaALTA0001156-2/2	0.189353	0.310901	-0.121548	0	NA	NA	NA	NA
SH3D21	HsaALTA0001159-1/4	0.040112	0.054586	-0.014475	0	0.054042	0.094803	-0.040761	0
SH3D21	HsaALTA0001159-2/4	0.862286	0.94215	-0.079864	0	0.872681	0.80678	0.065901	0
SH3D21	HsaALTA0001159-3/4	0.098297	0.033729	0.064568	0	0.08687	0.085684	0.001187	0
SH3D21	HsaALTA0001159-4/4	0.036359	0.03017	0.006189	0	0.022326	0.065747	-0.043421	0
SH3D21	HsaALTA0001162-1/4	0.782072	0.859741	-0.077669	0	0.825077	0.926044	-0.100967	0
SH3D21	HsaALTA0001162-2/4	0.091232	0.143123	-0.051892	0	0.120037	0.069765	0.050271	0
SH3D21	HsaALTA0001162-3/4	0.153761	0.044155	0.109606	0	0.069613	0.033809	0.035805	0
SH3D21	HsaALTA0001162-4/4	0.030348	0.046723	-0.016375	0	0.016564	0.03199	-0.015426	0
C1orf131	HsaALTA0001166-1/2	0.369544	0.416654	-0.04711	0	0.501545	0.471476	0.030069	0
C1orf131	HsaALTA0001166-2/2	0.625188	0.589904	0.035285	0	0.499305	0.537347	-0.038043	0.03
SZRD1	HsaALTA0001169-1/3	0.46037	0.553749	-0.093379	0	0.389078	0.45614	-0.067062	0
SZRD1	HsaALTA0001169-2/3	0.540842	0.445184	0.095658	0	0.610173	0.544687	0.065486	0
SZRD1	HsaALTA0001169-3/3	0.005623	0.004552	0.001071	0	0.002916	0.006488	-0.003571	0
COA6	HsaALTA0001186-1/2	0.995642	0.995564	7.8e-05	0	0.992815	0.986893	0.005922	0
COA6	HsaALTA0001186-2/2	0.004331	0.004365	-3.4e-05	0	0.008119	0.015468	-0.007349	0
BROX	HsaALTA0001192-1/3	0.03576	0.046141	-0.010381	0	NA	NA	NA	NA
BROX	HsaALTA0001192-2/3	0.964863	0.951387	0.013476	0	NA	NA	NA	NA
BROX	HsaALTA0001192-3/3	0.032557	0.049048	-0.016492	0	NA	NA	NA	NA
CHTOP	HsaALTA0001193-1/3	0.009428	0.009122	0.000306	0	0.006266	0.013039	-0.006773	0
CHTOP	HsaALTA0001193-2/3	0.496984	0.451021	0.045964	0	0.467519	0.448222	0.019297	0
CHTOP	HsaALTA0001193-3/3	0.502683	0.548397	-0.045714	0	0.525826	0.553217	-0.02739	0
GLMP	HsaALTA0001195-1/2	0.012828	0.008189	0.004639	0	0.012398	0.02483	-0.012433	0
GLMP	HsaALTA0001195-2/2	0.987204	0.991805	-0.004601	0	0.987382	0.974301	0.013082	0
FAAP20	HsaALTA0001196-1/2	0.98432	0.981481	0.002839	0	0.98901	0.977507	0.011503	0
FAAP20	HsaALTA0001196-2/2	0.015666	0.018389	-0.002724	0	0.011438	0.023284	-0.011846	0
FAM213B	HsaALTA0001202-1/2	0.921927	0.974342	-0.052415	0	NA	NA	NA	NA
FAM213B	HsaALTA0001202-2/2	0.081137	0.025669	0.055468	0	NA	NA	NA	NA
FAM213B	HsaALTA0001203-1/3	0.857307	0.893742	-0.036435	0	0.772559	0.68586	0.086698	0
FAM213B	HsaALTA0001203-2/3	0.145706	0.110839	0.034867	0	0.236251	0.31439	-0.078138	0.08
FAM213B	HsaALTA0001203-3/3	0.017517	0.013982	0.003534	0	0.030555	0.030696	-0.000141	0
FAM213B	HsaALTA0001204-1/3	0.023111	0.017159	0.005953	0	NA	NA	NA	NA
FAM213B	HsaALTA0001204-2/3	0.438469	0.316651	0.121817	0	NA	NA	NA	NA
FAM213B	HsaALTA0001204-3/3	0.572269	0.699359	-0.12709	0	NA	NA	NA	NA
GID8	HsaALTA0001206-1/6	0.004497	0.003212	0.001285	0	0.003412	0.003774	-0.000361	0
GID8	HsaALTA0001206-2/6	0.004234	0.004919	-0.000684	0	0.003792	0.003738	5.4e-05	0
GID8	HsaALTA0001206-3/6	0.978061	0.984863	-0.006802	0	0.956716	0.961215	-0.004499	0
GID8	HsaALTA0001206-4/6	0.00708	0.002885	0.004196	0	0.003455	0.004009	-0.000554	0
GID8	HsaALTA0001206-5/6	0.009879	0.009123	0.000756	0	0.017815	0.017398	0.000417	0
GID8	HsaALTA0001206-6/6	0.013686	0.006632	0.007054	0	0.028216	0.024527	0.003689	0
NDUFAF5	HsaALTA0001218-1/2	0.04776	0.044838	0.002923	0	0.047526	0.081636	-0.03411	0
NDUFAF5	HsaALTA0001218-2/2	0.952349	0.955872	-0.003522	0	0.955065	0.920642	0.034423	0
C21orf2	HsaALTA0001224-1/2	0.49852	0.428775	0.069745	0	NA	NA	NA	NA
C21orf2	HsaALTA0001224-2/2	0.493888	0.56925	-0.075362	0	NA	NA	NA	NA
C21orf2	HsaALTA0001225-1/2	0.037817	0.055228	-0.017411	0.01	NA	NA	NA	NA
C21orf2	HsaALTA0001225-2/2	0.962382	0.943394	0.018988	0	NA	NA	NA	NA
C21orf91	HsaALTA0001234-1/2	NA	NA	NA	NA	0.024454	0.020983	0.003471	0
C21orf91	HsaALTA0001234-2/2	NA	NA	NA	NA	0.976847	0.977916	-0.001069	0
GUCD1	HsaALTA0001235-1/2	0.864167	0.936039	-0.071872	0	0.894752	0.895796	-0.001045	0
GUCD1	HsaALTA0001235-2/2	0.133258	0.066558	0.066699	0	0.105118	0.101535	0.003583	0
PRR14L	HsaALTA0001240-1/2	NA	NA	NA	NA	0.065714	0.050354	0.01536	0
PRR14L	HsaALTA0001240-2/2	NA	NA	NA	NA	0.932096	0.953031	-0.020936	0
LRRC75B	HsaALTA0001242-1/2	0.764522	0.63454	0.129981	0	NA	NA	NA	NA
LRRC75B	HsaALTA0001242-2/2	0.245259	0.360208	-0.114949	0	NA	NA	NA	NA
C2CD2	HsaALTA0001244-1/2	0.052079	0.059444	-0.007364	0	0.02661	0.05728	-0.03067	0
C2CD2	HsaALTA0001244-2/2	0.951069	0.941021	0.010049	0	0.971577	0.948607	0.022969	0
C2CD2L	HsaALTA0001245-1/2	0.224887	0.070163	0.154724	0	0.134568	0.056492	0.078076	0
C2CD2L	HsaALTA0001245-2/2	0.780842	0.927352	-0.14651	0	0.861422	0.944138	-0.082716	0
C2CD2L	HsaALTA0001246-1/2	0.768849	0.712403	0.056446	0	NA	NA	NA	NA
C2CD2L	HsaALTA0001246-2/2	0.220475	0.290449	-0.069974	0.07	NA	NA	NA	NA
ATRAID	HsaALTA0001248-1/2	0.002018	0.001782	0.000236	0	0.005327	0.011103	-0.005776	0
ATRAID	HsaALTA0001248-2/2	0.997986	0.998311	-0.000325	0	0.994928	0.989269	0.005659	0
NDUFAF7	HsaALTA0001252-1/2	0.038574	0.024436	0.014137	0	0.056697	0.050081	0.006616	0
NDUFAF7	HsaALTA0001252-2/2	0.961101	0.975243	-0.014142	0	0.94559	0.950444	-0.004854	0
NDUFAF7	HsaALTA0001253-1/3	0.013479	0.026679	-0.0132	0	0.015763	0.015309	0.000454	0
NDUFAF7	HsaALTA0001253-2/3	0.014017	0.015838	-0.001821	0	0.016617	0.014175	0.002442	0
NDUFAF7	HsaALTA0001253-3/3	0.985947	0.973399	0.012548	0	0.984189	0.984415	-0.000227	0
NEPRO	HsaALTA0001265-1/4	0.036543	0.047417	-0.010874	0	NA	NA	NA	NA
NEPRO	HsaALTA0001265-2/4	0.021389	0.042901	-0.021513	0	NA	NA	NA	NA
NEPRO	HsaALTA0001265-3/4	0.961799	0.934783	0.027016	0	NA	NA	NA	NA
NEPRO	HsaALTA0001265-4/4	0.021578	0.028419	-0.006841	0	NA	NA	NA	NA
TCAIM	HsaALTA0001270-1/2	0.025543	0.042055	-0.016512	0	0.054794	0.05094	0.003854	0
TCAIM	HsaALTA0001270-2/2	0.974057	0.955197	0.018859	0	0.951742	0.945879	0.005863	0
TCAIM	HsaALTA0001272-1/2	0.626396	0.70544	-0.079044	0.07	0.856647	0.722314	0.134333	0
TCAIM	HsaALTA0001272-2/2	0.37769	0.305251	0.072439	0	0.136208	0.279467	-0.14326	0
C3orf33	HsaALTA0001275-1/2	0.044169	0.047471	-0.003302	0	NA	NA	NA	NA
C3orf33	HsaALTA0001275-2/2	0.957229	0.950482	0.006747	0	NA	NA	NA	NA
C3orf38	HsaALTA0001276-1/4	0.063729	0.031502	0.032227	0	NA	NA	NA	NA
C3orf38	HsaALTA0001276-2/4	0.038914	0.030584	0.00833	0	NA	NA	NA	NA
C3orf38	HsaALTA0001276-3/4	0.129534	0.162227	-0.032693	0	NA	NA	NA	NA
C3orf38	HsaALTA0001276-4/4	0.820423	0.847183	-0.02676	0	NA	NA	NA	NA
FAM208A	HsaALTA0001277-1/2	0.018537	0.02868	-0.010142	0	0.015326	0.046821	-0.031495	0
FAM208A	HsaALTA0001277-2/2	0.979151	0.969083	0.010068	0	0.984857	0.949779	0.035078	0
FAM208A	HsaALTA0001278-1/3	0.402112	0.398248	0.003864	0	0.210518	0.356444	-0.145926	0
FAM208A	HsaALTA0001278-2/3	0.594443	0.600953	-0.00651	0	0.784691	0.641622	0.143069	0
FAM208A	HsaALTA0001278-3/3	0.012209	0.018176	-0.005967	0	0.005685	0.017372	-0.011687	0
FAM208A	HsaALTA0001279-1/3	0.019158	0.026345	-0.007187	0	0.043272	0.05182	-0.008548	0
FAM208A	HsaALTA0001279-2/3	0.017889	0.029128	-0.011239	0	0.043183	0.048946	-0.005763	0
FAM208A	HsaALTA0001279-3/3	0.980516	0.971536	0.00898	0	0.957426	0.955941	0.001485	0
FAM208A	HsaALTA0001280-1/2	0.015495	0.042321	-0.026826	0	0.134656	0.076182	0.058473	0
FAM208A	HsaALTA0001280-2/2	0.985046	0.956783	0.028263	0	0.868768	0.923633	-0.054865	0
C4BPA	HsaALTA0001285-1/5	0.682878	0.664303	0.018575	0	0.64843	0.761308	-0.112878	0.02
C4BPA	HsaALTA0001285-2/5	0.167834	0.213523	-0.045689	0	0.212191	0.235913	-0.023723	0
C4BPA	HsaALTA0001285-3/5	0.004386	0.00747	-0.003084	0	0.005103	0.00459	0.000513	0
C4BPA	HsaALTA0001285-4/5	0.152314	0.128857	0.023457	0	0.139449	0.008174	0.131275	0.06
C4BPA	HsaALTA0001285-5/5	0.004603	0.007445	-0.002842	0	0.002899	0.004822	-0.001923	0
C4BPB	HsaALTA0001286-1/2	0.392438	0.43988	-0.047443	0	0.258626	0.312155	-0.053529	0
C4BPB	HsaALTA0001286-2/2	0.605828	0.561382	0.044446	0	0.743104	0.687151	0.055954	0
NOA1	HsaALTA0001287-1/2	0.011966	0.006227	0.005739	0	0.018013	0.027366	-0.009353	0
NOA1	HsaALTA0001287-2/2	0.987487	0.993128	-0.005641	0	0.98161	0.971762	0.009847	0
FAM198B	HsaALTA0001288-1/3	0.004099	0.011344	-0.007245	0	0.007971	0.019254	-0.011282	0
FAM198B	HsaALTA0001288-2/3	0.995782	0.988143	0.007639	0	0.99203	0.980315	0.011715	0
FAM198B	HsaALTA0001288-3/3	0.00404	0.011506	-0.007466	0	0.007594	0.019823	-0.012229	0
FAM198B	HsaALTA0001289-1/2	0.004991	0.010297	-0.005306	0	0.00978	0.016055	-0.006275	0
FAM198B	HsaALTA0001289-2/2	0.995488	0.990853	0.004635	0	0.989929	0.983522	0.006407	0
TRAPPC11	HsaALTA0001297-1/3	0.021517	0.045014	-0.023497	0	0.056228	0.051271	0.004957	0
TRAPPC11	HsaALTA0001297-2/3	0.024142	0.04892	-0.024778	0	0.125628	0.06117	0.064459	0
TRAPPC11	HsaALTA0001297-3/3	0.978304	0.952916	0.025388	0	0.882457	0.940538	-0.058081	0
TRAPPC11	HsaALTA0001298-1/2	0.970739	0.93045	0.04029	0	NA	NA	NA	NA
TRAPPC11	HsaALTA0001298-2/2	0.028927	0.068624	-0.039697	0	NA	NA	NA	NA
TRAPPC11	HsaALTA0001299-1/3	0.977932	0.953296	0.024636	0	NA	NA	NA	NA
TRAPPC11	HsaALTA0001299-2/3	0.013237	0.020398	-0.007162	0	NA	NA	NA	NA
TRAPPC11	HsaALTA0001299-3/3	0.020729	0.045117	-0.024388	0	NA	NA	NA	NA
FAM193A	HsaALTA0001302-1/2	0.076669	0.054537	0.022131	0	0.050286	0.113008	-0.062722	0
FAM193A	HsaALTA0001302-2/2	0.920445	0.944264	-0.023819	0	0.951845	0.881545	0.0703	0
NREP	HsaALTA0001306-1/2	0.023759	0.019802	0.003957	0	0.040514	0.033136	0.007378	0
NREP	HsaALTA0001306-2/2	0.976091	0.980414	-0.004322	0	0.959835	0.966391	-0.006556	0
C5orf22	HsaALTA0001308-1/3	0.052919	0.037777	0.015143	0	0.033907	0.114217	-0.08031	0.08
C5orf22	HsaALTA0001308-2/3	0.056494	0.072291	-0.015797	0	0.1	0.122585	-0.022586	0.02
C5orf22	HsaALTA0001308-3/3	0.905082	0.902914	0.002168	0	0.898481	0.800298	0.098182	0
POC5	HsaALTA0001310-1/2	0.948771	0.948243	0.000528	0	0.960217	0.960024	0.000193	0
POC5	HsaALTA0001310-2/2	0.053748	0.051506	0.002243	0	0.037549	0.0415	-0.003952	0
FAXDC2	HsaALTA0001312-1/2	0.958979	0.98349	-0.024511	0	NA	NA	NA	NA
FAXDC2	HsaALTA0001312-2/2	0.040593	0.015197	0.025395	0	NA	NA	NA	NA
CREBRF	HsaALTA0001313-1/2	0.083833	0.065083	0.01875	0	NA	NA	NA	NA
CREBRF	HsaALTA0001313-2/2	0.917546	0.927873	-0.010327	0	NA	NA	NA	NA
TRAPPC13	HsaALTA0001320-1/2	0.515206	0.713874	-0.198668	0	NA	NA	NA	NA
TRAPPC13	HsaALTA0001320-2/2	0.486125	0.28767	0.198455	0	NA	NA	NA	NA
DNPH1	HsaALTA0001327-1/3	0.020636	0.015541	0.005096	0	0.038641	0.032111	0.006529	0
DNPH1	HsaALTA0001327-2/3	0.012057	0.014353	-0.002296	0	0.043401	0.037735	0.005666	0
DNPH1	HsaALTA0001327-3/3	0.97907	0.985922	-0.006852	0	0.963316	0.964582	-0.001266	0
C6orf136	HsaALTA0001329-1/2	0.01614	0.020798	-0.004658	0	0.007091	0.037345	-0.030254	0
C6orf136	HsaALTA0001329-2/2	0.983961	0.978217	0.005743	0	0.993008	0.9593	0.033708	0
C6orf48	HsaALTA0001342-1/3	0.975667	0.968778	0.006889	0	NA	NA	NA	NA
C6orf48	HsaALTA0001342-2/3	0.02373	0.029449	-0.005718	0	NA	NA	NA	NA
C6orf48	HsaALTA0001342-3/3	0.013346	0.00941	0.003936	0	NA	NA	NA	NA
YAE1D1	HsaALTA0001349-1/2	0.023512	0.027593	-0.004081	0	NA	NA	NA	NA
YAE1D1	HsaALTA0001349-2/2	0.974584	0.971996	0.002588	0	NA	NA	NA	NA
TMEM248	HsaALTA0001350-1/2	0.006299	0.00682	-0.000521	0	0.010733	0.043067	-0.032333	0
TMEM248	HsaALTA0001350-2/2	0.994125	0.992857	0.001269	0	0.989317	0.957254	0.032063	0
C7orf49	HsaALTA0001354-1/2	0.964917	0.973555	-0.008638	0	0.975041	0.964997	0.010044	0
C7orf49	HsaALTA0001354-2/2	0.036526	0.026476	0.01005	0	0.023777	0.034065	-0.010288	0
LAMTOR4	HsaALTA0001360-1/3	0.974348	0.970403	0.003945	0	0.966605	0.972294	-0.005689	0
LAMTOR4	HsaALTA0001360-2/3	0.021539	0.030359	-0.00882	0	0.03204	0.029721	0.002318	0
LAMTOR4	HsaALTA0001360-3/3	0.007824	0.003663	0.004161	0	0.008264	0.009973	-0.001709	0
C8G	HsaALTA0001364-1/3	0.924238	0.941998	-0.01776	0	NA	NA	NA	NA
C8G	HsaALTA0001364-2/3	0.062459	0.054276	0.008184	0	NA	NA	NA	NA
C8G	HsaALTA0001364-3/3	0.029893	0.030757	-0.000864	0	NA	NA	NA	NA
SMIM19	HsaALTA0001368-1/2	0.007944	0.015052	-0.007108	0	0.011221	0.018028	-0.006807	0
SMIM19	HsaALTA0001368-2/2	0.99187	0.98549	0.00638	0	0.989283	0.981904	0.007379	0
C8orf58	HsaALTA0001371-1/2	0.424533	0.365951	0.058582	0.06	NA	NA	NA	NA
C8orf58	HsaALTA0001371-2/2	0.576079	0.647189	-0.07111	0	NA	NA	NA	NA
C8orf59	HsaALTA0001372-1/2	0.186257	0.191865	-0.005608	0	0.179825	0.044716	0.135109	0
C8orf59	HsaALTA0001372-2/2	0.811221	0.811045	0.000177	0	0.821539	0.955683	-0.134144	0
TRIQK	HsaALTA0001374-1/2	0.009822	0.01667	-0.006847	0	0.006172	0.004954	0.001218	0
TRIQK	HsaALTA0001374-2/2	0.991249	0.98401	0.007239	0	0.993013	0.99521	-0.002198	0
TRIQK	HsaALTA0001375-1/3	0.174647	0.090015	0.084632	0	0.046678	0.092513	-0.045836	0
TRIQK	HsaALTA0001375-2/3	0.822366	0.910111	-0.087746	0	0.936959	0.910625	0.026335	0
TRIQK	HsaALTA0001375-3/3	0.009274	0.009512	-0.000239	0	0.034851	0.014969	0.019882	0
TRIQK	HsaALTA0001376-1/2	0.505217	0.421967	0.08325	0	0.348512	0.414866	-0.066354	0
TRIQK	HsaALTA0001376-2/2	0.489607	0.582468	-0.092861	0	0.645281	0.584423	0.060858	0
SPOUT1	HsaALTA0001378-1/4	0.038432	0.026637	0.011795	0	0.005139	0.006083	-0.000944	0
SPOUT1	HsaALTA0001378-2/4	0.037714	0.028168	0.009546	0	0.008216	0.006073	0.002143	0
SPOUT1	HsaALTA0001378-3/4	0.960851	0.972978	-0.012126	0	0.984765	0.993	-0.008235	0
SPOUT1	HsaALTA0001378-4/4	0.038368	0.0273	0.011068	0	0.012655	0.006163	0.006491	0
SPOUT1	HsaALTA0001379-1/2	0.068262	0.069292	-0.00103	0	NA	NA	NA	NA
SPOUT1	HsaALTA0001379-2/2	0.931796	0.935466	-0.00367	0	NA	NA	NA	NA
C9orf116	HsaALTA0001380-1/2	NA	NA	NA	NA	0.077092	0.067171	0.009921	0
C9orf116	HsaALTA0001380-2/2	NA	NA	NA	NA	0.923947	0.937646	-0.013699	0
SWI5	HsaALTA0001382-1/2	0.703148	0.544899	0.158249	0	NA	NA	NA	NA
SWI5	HsaALTA0001382-2/2	0.294418	0.457036	-0.162619	0	NA	NA	NA	NA
FAM219A	HsaALTA0001387-1/2	0.148984	0.266078	-0.117093	0	0.359219	0.290136	0.069083	0
FAM219A	HsaALTA0001387-2/2	0.854185	0.72732	0.126865	0	0.649362	0.692485	-0.043124	0
C9orf78	HsaALTA0001388-1/4	0.006236	0.00843	-0.002194	0	0.006412	0.012539	-0.006127	0
C9orf78	HsaALTA0001388-2/4	0.994018	0.992123	0.001895	0	0.993817	0.986953	0.006865	0
C9orf78	HsaALTA0001388-3/4	0.006123	0.00819	-0.002067	0	0.006361	0.012356	-0.005996	0
C9orf78	HsaALTA0001388-4/4	0.005845	0.008161	-0.002316	0	0.00667	0.012093	-0.005423	0
CAAP1	HsaALTA0001389-1/2	0.959773	0.981467	-0.021694	0	0.97497	0.974108	0.000861	0
CAAP1	HsaALTA0001389-2/2	0.039096	0.017541	0.021555	0	0.025989	0.024849	0.00114	0
RABL6	HsaALTA0001391-1/2	0.988918	0.981231	0.007687	0	0.971384	0.944755	0.02663	0
RABL6	HsaALTA0001391-2/2	0.010847	0.018831	-0.007985	0	0.029984	0.054738	-0.024754	0.02
CAD	HsaALTA0001414-1/3	0.018191	0.036217	-0.018026	0	NA	NA	NA	NA
CAD	HsaALTA0001414-2/3	0.018379	0.036691	-0.018312	0	NA	NA	NA	NA
CAD	HsaALTA0001414-3/3	0.982813	0.967022	0.015791	0	NA	NA	NA	NA
CAD	HsaALTA0001415-1/2	0.980877	0.972629	0.008248	0	0.964381	0.954303	0.010078	0
CAD	HsaALTA0001415-2/2	0.020135	0.028173	-0.008038	0	0.03743	0.043326	-0.005896	0
CALCOCO1	HsaALTA0001419-1/2	0.009435	0.017368	-0.007932	0	NA	NA	NA	NA
CALCOCO1	HsaALTA0001419-2/2	0.990505	0.983793	0.006712	0	NA	NA	NA	NA
CALCOCO1	HsaALTA0001420-1/2	0.989733	0.978535	0.011198	0	0.967785	0.97474	-0.006955	0
CALCOCO1	HsaALTA0001420-2/2	0.010463	0.021315	-0.010852	0	0.031575	0.027928	0.003647	0
CALCOCO2	HsaALTA0001421-1/2	0.013455	0.008402	0.005053	0	0.018414	0.044869	-0.026454	0
CALCOCO2	HsaALTA0001421-2/2	0.986721	0.99121	-0.004489	0	0.980189	0.96237	0.017819	0
CALD1	HsaALTA0001424-1/2	0.071388	0.062019	0.009369	0	0.064702	0.190987	-0.126285	0.02
CALD1	HsaALTA0001424-2/2	0.928528	0.938099	-0.009571	0	0.935778	0.805697	0.130081	0.03
CALM3	HsaALTA0001426-1/3	0.001056	0.001895	-0.000839	0	0.001229	0.00274	-0.001511	0
CALM3	HsaALTA0001426-2/3	0.001037	0.001216	-0.000179	0	0.003195	0.006337	-0.003142	0
CALM3	HsaALTA0001426-3/3	0.998974	0.997891	0.001083	0	0.996821	0.993765	0.003055	0
CALM3	HsaALTA0001427-1/2	0.999154	0.999094	6e-05	0	0.999446	0.999035	0.000411	0
CALM3	HsaALTA0001427-2/2	0.000876	0.000971	-9.5e-05	0	0.000604	0.000942	-0.000338	0
CALR	HsaALTA0001430-1/4	0.000391	0.000409	-1.7e-05	0	0.0004	0.00052	-0.000119	0
CALR	HsaALTA0001430-2/4	0.000401	0.000414	-1.4e-05	0	0.000418	0.000311	0.000108	0
CALR	HsaALTA0001430-3/4	0.000649	0.00095	-0.000301	0	0.000695	0.000477	0.000219	0
CALR	HsaALTA0001430-4/4	0.999344	0.999022	0.000322	0	0.999352	0.999275	7.7e-05	0
CAMK1	HsaALTA0001432-1/3	0.02025	0.012881	0.007369	0	0.019749	0.066141	-0.046392	0
CAMK1	HsaALTA0001432-2/3	0.978873	0.987205	-0.008331	0	0.97789	0.932592	0.045298	0
CAMK1	HsaALTA0001432-3/3	0.01932	0.012078	0.007242	0	0.012683	0.030508	-0.017825	0
CAMK1	HsaALTA0001433-1/3	0.018803	0.010554	0.008249	0	0.020416	0.040983	-0.020567	0.02
CAMK1	HsaALTA0001433-2/3	0.98098	0.989855	-0.008875	0	0.977282	0.959424	0.017858	0
CAMK1	HsaALTA0001433-3/3	0.018629	0.010236	0.008393	0	0.02207	0.041678	-0.019608	0.01
CAMK2D	HsaALTA0001438-1/2	0.038321	0.057961	-0.01964	0	0.028791	0.0706	-0.041809	0
CAMK2D	HsaALTA0001438-2/2	0.960132	0.942548	0.017584	0	0.971807	0.924158	0.047649	0
CAMK2D	HsaALTA0001439-1/2	0.018018	0.019099	-0.001081	0	0.030286	0.033763	-0.003476	0
CAMK2D	HsaALTA0001439-2/2	0.982774	0.980368	0.002406	0	0.971665	0.964164	0.007501	0
CAMTA1	HsaALTA0001446-1/3	NA	NA	NA	NA	0.0617	0.043463	0.018237	0
CAMTA1	HsaALTA0001446-2/3	NA	NA	NA	NA	0.059494	0.049608	0.009886	0
CAMTA1	HsaALTA0001446-3/3	NA	NA	NA	NA	0.941823	0.954591	-0.012769	0.01
CAMTA2	HsaALTA0001447-1/6	0.78439	0.634502	0.149888	0	0.797689	0.678746	0.118942	0
CAMTA2	HsaALTA0001447-2/6	0.053234	0.105658	-0.052424	0.05	0.076356	0.103799	-0.027443	0
CAMTA2	HsaALTA0001447-3/6	0.024216	0.043094	-0.018878	0.01	0.023821	0.025094	-0.001274	0
CAMTA2	HsaALTA0001447-4/6	0.180919	0.311877	-0.130957	0.13	0.150207	0.225316	-0.075108	0
CAMTA2	HsaALTA0001447-5/6	0.023571	0.044746	-0.021175	0.01	0.024073	0.025603	-0.00153	0
CAMTA2	HsaALTA0001447-6/6	0.022528	0.035318	-0.012789	0.01	0.023928	0.026807	-0.002879	0
CANX	HsaALTA0001451-1/2	0.001896	0.001342	0.000554	0	0.001095	0.003011	-0.001915	0
CANX	HsaALTA0001451-2/2	0.998102	0.998699	-0.000596	0	0.998911	0.996674	0.002237	0
CANX	HsaALTA0001452-1/8	0.000793	0.000528	0.000264	0	0.000169	0.000202	-3.3e-05	0
CANX	HsaALTA0001452-2/8	0.000706	0.000827	-0.000122	0	0.000171	0.000188	-1.7e-05	0
CANX	HsaALTA0001452-3/8	0.000803	0.000488	0.000315	0	0.000169	0.000174	-5e-06	0
CANX	HsaALTA0001452-4/8	0.001317	0.000533	0.000785	0	0.000177	0.000308	-0.000131	0
CANX	HsaALTA0001452-5/8	0.001467	0.001031	0.000437	0	0.000654	0.000698	-4.4e-05	0
CANX	HsaALTA0001452-6/8	0.007523	0.006247	0.001276	0	0.010872	0.010796	7.6e-05	0
CANX	HsaALTA0001452-7/8	0.991471	0.992936	-0.001465	0	0.988627	0.988588	3.9e-05	0
CANX	HsaALTA0001452-8/8	0.000759	0.000554	0.000205	0	0.000167	0.000182	-1.5e-05	0
CAP1	HsaALTA0001453-1/2	0.72162	0.657046	0.064574	0	0.753422	0.713903	0.039518	0
CAP1	HsaALTA0001453-2/2	0.281276	0.34021	-0.058934	0	0.244873	0.282252	-0.037379	0
CAP1	HsaALTA0001454-1/2	0.120919	0.113568	0.007351	0	0.048739	0.113005	-0.064266	0.01
CAP1	HsaALTA0001454-2/2	0.879622	0.885359	-0.005737	0	0.951914	0.887606	0.064308	0.01
CAPG	HsaALTA0001455-1/3	0.063604	0.04015	0.023454	0	NA	NA	NA	NA
CAPG	HsaALTA0001455-2/3	0.938193	0.95968	-0.021487	0	NA	NA	NA	NA
CAPG	HsaALTA0001455-3/3	0.063979	0.042187	0.021792	0	NA	NA	NA	NA
CAPG	HsaALTA0001457-1/3	0.048297	0.042538	0.005759	0	NA	NA	NA	NA
CAPG	HsaALTA0001457-2/3	0.946931	0.956275	-0.009345	0	NA	NA	NA	NA
CAPG	HsaALTA0001457-3/3	0.046874	0.042917	0.003957	0	NA	NA	NA	NA
CAPN2	HsaALTA0001460-1/3	0.059068	0.048806	0.010261	0	NA	NA	NA	NA
CAPN2	HsaALTA0001460-2/3	0.946332	0.955627	-0.009296	0	NA	NA	NA	NA
CAPN2	HsaALTA0001460-3/3	0.047706	0.044082	0.003624	0	NA	NA	NA	NA
CAPN7	HsaALTA0001461-1/4	0.012239	0.020501	-0.008262	0	0.042935	0.029434	0.013501	0
CAPN7	HsaALTA0001461-2/4	0.012527	0.019203	-0.006676	0	0.042993	0.03068	0.012313	0
CAPN7	HsaALTA0001461-3/4	0.011146	0.022354	-0.011208	0	0.042343	0.029813	0.01253	0
CAPN7	HsaALTA0001461-4/4	0.988272	0.981176	0.007096	0	0.956469	0.968987	-0.012518	0
CAPNS1	HsaALTA0001463-1/2	0.229756	0.24979	-0.020034	0	0.358032	0.234538	0.123494	0
CAPNS1	HsaALTA0001463-2/2	0.767166	0.755807	0.01136	0	0.642719	0.772212	-0.129493	0.13
CAPRIN2	HsaALTA0001466-1/3	0.129972	0.367624	-0.237652	0	0.127814	0.209849	-0.082035	0
CAPRIN2	HsaALTA0001466-2/3	0.615903	0.465111	0.150792	0	0.591404	0.534443	0.056961	0
CAPRIN2	HsaALTA0001466-3/3	0.294651	0.194984	0.099667	0	0.293731	0.265613	0.028118	0
CAPRIN2	HsaALTA0001467-1/4	0.743323	0.687124	0.056199	0	0.520907	0.73202	-0.211114	0
CAPRIN2	HsaALTA0001467-2/4	0.239192	0.279522	-0.04033	0	0.402923	0.270485	0.132438	0
CAPRIN2	HsaALTA0001467-3/4	0.014773	0.040569	-0.025796	0	0.02754	0.044827	-0.017287	0
CAPRIN2	HsaALTA0001467-4/4	0.024856	0.062443	-0.037587	0	0.101578	0.044586	0.056992	0
CAPZA2	HsaALTA0001469-1/3	0.00626	0.006259	1e-06	0	0.009898	0.00535	0.004548	0
CAPZA2	HsaALTA0001469-2/3	0.007477	0.006184	0.001293	0	0.009047	0.005153	0.003894	0
CAPZA2	HsaALTA0001469-3/3	0.993429	0.993156	0.000273	0	0.991123	0.994732	-0.003608	0
CARD10	HsaALTA0001472-1/3	0.006697	0.010473	-0.003775	0	0.012526	0.019528	-0.007002	0
CARD10	HsaALTA0001472-2/3	0.993067	0.986939	0.006129	0	0.987164	0.979548	0.007616	0
CARD10	HsaALTA0001472-3/3	0.004172	0.005254	-0.001081	0	0.013246	0.01859	-0.005344	0
CARD8	HsaALTA0001477-1/3	0.065864	0.044172	0.021692	0	NA	NA	NA	NA
CARD8	HsaALTA0001477-2/3	0.13122	0.15113	-0.01991	0	NA	NA	NA	NA
CARD8	HsaALTA0001477-3/3	0.837912	0.852177	-0.014265	0	NA	NA	NA	NA
CARD8	HsaALTA0001478-1/2	0.060718	0.087231	-0.026513	0	0.108854	0.066697	0.042157	0
CARD8	HsaALTA0001478-2/2	0.932911	0.909242	0.023669	0	0.88917	0.9366	-0.04743	0
CARD9	HsaALTA0001479-1/3	NA	NA	NA	NA	0.037704	0.035128	0.002577	0
CARD9	HsaALTA0001479-2/3	NA	NA	NA	NA	0.022921	0.036881	-0.01396	0
CARD9	HsaALTA0001479-3/3	NA	NA	NA	NA	0.958191	0.965714	-0.007523	0
NAXD	HsaALTA0001480-1/3	0.975538	0.968946	0.006592	0	0.911094	0.957961	-0.046867	0.04
NAXD	HsaALTA0001480-2/3	0.015482	0.020326	-0.004844	0	0.038119	0.042246	-0.004127	0
NAXD	HsaALTA0001480-3/3	0.023904	0.030864	-0.00696	0	0.089446	0.049113	0.040333	0
NAXD	HsaALTA0001481-1/3	0.979128	0.973113	0.006015	0	NA	NA	NA	NA
NAXD	HsaALTA0001481-2/3	0.019672	0.028262	-0.00859	0	NA	NA	NA	NA
NAXD	HsaALTA0001481-3/3	0.019062	0.028232	-0.00917	0	NA	NA	NA	NA
CARS	HsaALTA0001483-1/4	0.981782	0.985356	-0.003574	0	0.937013	0.976714	-0.039701	0
CARS	HsaALTA0001483-2/4	0.014701	0.014657	4.5e-05	0	0.026389	0.022544	0.003845	0
CARS	HsaALTA0001483-3/4	0.016733	0.014544	0.002189	0	0.023335	0.023418	-8.3e-05	0
CARS	HsaALTA0001483-4/4	0.015115	0.015657	-0.000542	0	0.063014	0.022221	0.040793	0
CASD1	HsaALTA0001487-1/2	0.025817	0.011047	0.01477	0	NA	NA	NA	NA
CASD1	HsaALTA0001487-2/2	0.973159	0.98932	-0.016161	0	NA	NA	NA	NA
CASK	HsaALTA0001488-1/2	0.015312	0.019439	-0.004127	0	0.012692	0.021538	-0.008846	0
CASK	HsaALTA0001488-2/2	0.985131	0.978957	0.006175	0	0.98606	0.976838	0.009222	0
CASP2	HsaALTA0001489-1/2	0.038556	0.034192	0.004364	0	0.038091	0.06385	-0.025759	0
CASP2	HsaALTA0001489-2/2	0.961138	0.964243	-0.003105	0	0.96041	0.946934	0.013476	0
CASP4	HsaALTA0001490-1/2	0.040328	0.04559	-0.005262	0	0.054588	0.066028	-0.01144	0
CASP4	HsaALTA0001490-2/2	0.958992	0.954061	0.004931	0	0.944805	0.933177	0.011629	0
CASP4	HsaALTA0001491-1/3	0.961873	0.969574	-0.007702	0	0.965718	0.981496	-0.015778	0
CASP4	HsaALTA0001491-2/3	0.032829	0.029706	0.003123	0	0.032982	0.019352	0.01363	0
CASP4	HsaALTA0001491-3/3	0.013931	0.008541	0.00539	0	0.013053	0.018477	-0.005424	0
CASP8	HsaALTA0001493-1/2	0.136204	0.202511	-0.066306	0	0.24169	0.23252	0.00917	0
CASP8	HsaALTA0001493-2/2	0.867091	0.805128	0.061963	0	0.755136	0.765401	-0.010265	0
CAST	HsaALTA0001497-1/2	0.991169	0.991897	-0.000728	0	0.988205	0.985657	0.002548	0
CAST	HsaALTA0001497-2/2	0.009581	0.007555	0.002026	0	0.010947	0.012978	-0.002031	0
CAST	HsaALTA0001498-1/2	0.190289	0.232516	-0.042228	0	0.236914	0.306424	-0.06951	0
CAST	HsaALTA0001498-2/2	0.81113	0.760018	0.051112	0	0.766477	0.690837	0.07564	0
CBLL1	HsaALTA0001510-1/2	0.155574	0.222918	-0.067344	0	0.195576	0.253264	-0.057687	0
CBLL1	HsaALTA0001510-2/2	0.847039	0.780195	0.066844	0	0.80533	0.74028	0.06505	0
CBR1	HsaALTA0001511-1/2	0.989047	0.986196	0.002851	0	0.981842	0.971389	0.010452	0
CBR1	HsaALTA0001511-2/2	0.010925	0.013466	-0.002541	0	0.01655	0.026052	-0.009502	0
CBX4	HsaALTA0001519-1/2	0.014274	0.024492	-0.010218	0	0.014492	0.021618	-0.007126	0
CBX4	HsaALTA0001519-2/2	0.985132	0.974901	0.010231	0	0.986425	0.97684	0.009585	0
CBX4	HsaALTA0001520-1/2	0.926275	0.897321	0.028954	0	0.950167	0.922071	0.028096	0
CBX4	HsaALTA0001520-2/2	0.071568	0.103551	-0.031983	0	0.047869	0.071518	-0.023649	0
CBY1	HsaALTA0001523-1/2	0.959239	0.957358	0.001881	0	0.95	0.981014	-0.031014	0
CBY1	HsaALTA0001523-2/2	0.03975	0.042706	-0.002956	0	0.050942	0.018064	0.032878	0
CC2D1A	HsaALTA0001525-1/3	0.963418	0.959796	0.003622	0	NA	NA	NA	NA
CC2D1A	HsaALTA0001525-2/3	0.039017	0.050471	-0.011453	0.01	NA	NA	NA	NA
CC2D1A	HsaALTA0001525-3/3	0.036742	0.049966	-0.013224	0.01	NA	NA	NA	NA
CC2D1A	HsaALTA0001526-1/3	0.015808	0.035935	-0.020127	0	NA	NA	NA	NA
CC2D1A	HsaALTA0001526-2/3	0.983972	0.96359	0.020382	0	NA	NA	NA	NA
CC2D1A	HsaALTA0001526-3/3	0.016822	0.03185	-0.015028	0	NA	NA	NA	NA
CC2D1A	HsaALTA0001527-1/2	0.178521	0.075914	0.102607	0	NA	NA	NA	NA
CC2D1A	HsaALTA0001527-2/2	0.824855	0.923896	-0.099041	0	NA	NA	NA	NA
CC2D1A	HsaALTA0001528-1/2	0.03597	0.034639	0.001331	0	NA	NA	NA	NA
CC2D1A	HsaALTA0001528-2/2	0.963368	0.965104	-0.001736	0	NA	NA	NA	NA
CC2D1B	HsaALTA0001529-1/3	0.060648	0.050974	0.009673	0	0.04834	0.049806	-0.001466	0
CC2D1B	HsaALTA0001529-2/3	0.876751	0.857244	0.019507	0	0.813124	0.9467	-0.133576	0.12
CC2D1B	HsaALTA0001529-3/3	0.122677	0.142932	-0.020255	0	0.185953	0.064391	0.121562	0
CC2D1B	HsaALTA0001531-1/4	0.029653	0.036806	-0.007153	0	0.015227	0.023322	-0.008095	0
CC2D1B	HsaALTA0001531-2/4	0.029188	0.034526	-0.005337	0	0.015293	0.02305	-0.007757	0
CC2D1B	HsaALTA0001531-3/4	0.043501	0.084869	-0.041368	0	0.060078	0.024259	0.03582	0
CC2D1B	HsaALTA0001531-4/4	0.953879	0.913296	0.040582	0	0.939845	0.97604	-0.036194	0
KYAT1	HsaALTA0001534-1/2	0.922106	0.884658	0.037448	0	NA	NA	NA	NA
KYAT1	HsaALTA0001534-2/2	0.073503	0.12159	-0.048087	0	NA	NA	NA	NA
KYAT1	HsaALTA0001535-1/3	0.771249	0.864315	-0.093066	0	NA	NA	NA	NA
KYAT1	HsaALTA0001535-2/3	0.224615	0.137039	0.087576	0	NA	NA	NA	NA
KYAT1	HsaALTA0001535-3/3	0.016259	0.014735	0.001523	0	NA	NA	NA	NA
CFAP36	HsaALTA0001536-1/3	0.017611	0.014922	0.002689	0	0.009728	0.009225	0.000503	0
CFAP36	HsaALTA0001536-2/3	0.017575	0.016041	0.001534	0	0.009657	0.009638	1.8e-05	0
CFAP36	HsaALTA0001536-3/3	0.981005	0.982682	-0.001678	0	0.990489	0.991285	-0.000796	0
CCDC107	HsaALTA0001538-1/5	0.125788	0.092979	0.032809	0	0.118705	0.097507	0.021198	0
CCDC107	HsaALTA0001538-2/5	0.122815	0.132531	-0.009716	0	0.103764	0.099103	0.004661	0
CCDC107	HsaALTA0001538-3/5	0.022708	0.048246	-0.025537	0	0.125895	0.041431	0.084464	0
CCDC107	HsaALTA0001538-4/5	0.769483	0.7581	0.011383	0	0.706826	0.83162	-0.124793	0
CCDC107	HsaALTA0001538-5/5	0.021268	0.020679	0.000589	0	0.02431	0.044957	-0.020648	0
PRIMPOL	HsaALTA0001542-1/3	NA	NA	NA	NA	0.029659	0.042685	-0.013026	0
PRIMPOL	HsaALTA0001542-2/3	NA	NA	NA	NA	0.244901	0.293805	-0.048905	0
PRIMPOL	HsaALTA0001542-3/3	NA	NA	NA	NA	0.753003	0.709297	0.043707	0
CCDC130	HsaALTA0001548-1/3	0.07464	0.050331	0.024309	0	NA	NA	NA	NA
CCDC130	HsaALTA0001548-2/3	0.101188	0.049022	0.052166	0	NA	NA	NA	NA
CCDC130	HsaALTA0001548-3/3	0.867612	0.94331	-0.075698	0	NA	NA	NA	NA
VPS50	HsaALTA0001550-1/2	0.066474	0.056389	0.010086	0	NA	NA	NA	NA
VPS50	HsaALTA0001550-2/2	0.93223	0.944091	-0.01186	0	NA	NA	NA	NA
VPS50	HsaALTA0001551-1/2	0.059388	0.057842	0.001546	0	0.04547	0.012427	0.033043	0
VPS50	HsaALTA0001551-2/2	0.944078	0.947313	-0.003236	0	0.957277	0.987128	-0.029851	0
CCDC142	HsaALTA0001557-1/3	0.133719	0.199884	-0.066165	0	NA	NA	NA	NA
CCDC142	HsaALTA0001557-2/3	0.859165	0.773384	0.085781	0.1	NA	NA	NA	NA
CCDC142	HsaALTA0001557-3/3	0.063323	0.067446	-0.004124	0	NA	NA	NA	NA
CCDC150	HsaALTA0001560-1/2	0.970104	0.886284	0.08382	0	0.923846	0.944785	-0.020939	0
CCDC150	HsaALTA0001560-2/2	0.028639	0.111851	-0.083212	0.08	0.078479	0.056762	0.021717	0
CCDC18	HsaALTA0001566-1/2	NA	NA	NA	NA	0.373984	0.302071	0.071912	0
CCDC18	HsaALTA0001566-2/2	NA	NA	NA	NA	0.627034	0.700864	-0.07383	0
CEP85	HsaALTA0001568-1/2	0.750781	0.729756	0.021024	0	NA	NA	NA	NA
CEP85	HsaALTA0001568-2/2	0.243811	0.271913	-0.028102	0	NA	NA	NA	NA
CCDC22	HsaALTA0001569-1/3	0.025311	0.035142	-0.009831	0	NA	NA	NA	NA
CCDC22	HsaALTA0001569-2/3	0.97439	0.965497	0.008893	0	NA	NA	NA	NA
CCDC22	HsaALTA0001569-3/3	0.024167	0.036513	-0.012346	0	NA	NA	NA	NA
CCDC24	HsaALTA0001572-1/5	0.415944	0.376978	0.038966	0.06	NA	NA	NA	NA
CEP95	HsaALTA0001576-1/2	0.915491	0.944406	-0.028914	0	0.949824	0.958461	-0.008636	0
CEP95	HsaALTA0001576-2/2	0.084099	0.056495	0.027604	0	0.052415	0.041786	0.010628	0
CCDC51	HsaALTA0001578-1/2	0.279397	0.449805	-0.170408	0	NA	NA	NA	NA
CCDC51	HsaALTA0001578-2/2	0.727133	0.549277	0.177857	0	NA	NA	NA	NA
CCDC51	HsaALTA0001579-1/2	0.972728	0.974425	-0.001697	0	0.958022	0.909579	0.048443	0
CCDC51	HsaALTA0001579-2/2	0.029025	0.024251	0.004774	0	0.043956	0.090029	-0.046073	0
CCDC66	HsaALTA0001588-1/4	NA	NA	NA	NA	0.032657	0.040682	-0.008024	0.01
CCDC66	HsaALTA0001588-2/4	NA	NA	NA	NA	0.144977	0.040488	0.104489	0
CCDC66	HsaALTA0001588-3/4	NA	NA	NA	NA	0.03398	0.03957	-0.00559	0.01
CCDC66	HsaALTA0001588-4/4	NA	NA	NA	NA	0.825269	0.95849	-0.133221	0.13
TRMT13	HsaALTA0001590-1/3	0.197736	0.255587	-0.057851	0	0.086348	0.090303	-0.003956	0
TRMT13	HsaALTA0001590-2/3	0.811772	0.736251	0.075521	0	0.908915	0.900913	0.008002	0
TRMT13	HsaALTA0001590-3/3	0.043241	0.057502	-0.01426	0	0.028353	0.023591	0.004762	0
CCDC88A	HsaALTA0001593-1/3	0.185631	0.245843	-0.060211	0	0.29705	0.239645	0.057406	0
CCDC88A	HsaALTA0001593-2/3	0.807764	0.756733	0.051031	0	0.700929	0.758475	-0.057546	0
CCDC88A	HsaALTA0001593-3/3	0.013992	0.023091	-0.0091	0	0.022182	0.017799	0.004383	0
CCDC93	HsaALTA0001596-1/2	0.088687	0.104795	-0.016108	0	0.068865	0.136389	-0.067525	0
CCDC93	HsaALTA0001596-2/2	0.915909	0.902403	0.013506	0	0.928877	0.864165	0.064712	0
SPDL1	HsaALTA0001598-1/2	0.968946	0.937316	0.03163	0	0.982418	0.976632	0.005786	0
SPDL1	HsaALTA0001598-2/2	0.030966	0.06684	-0.035874	0	0.0187	0.022089	-0.003389	0
SPDL1	HsaALTA0001599-1/2	0.124792	0.042783	0.082009	0	0.018946	0.131221	-0.112275	0.01
SPDL1	HsaALTA0001599-2/2	0.873562	0.958964	-0.085402	0	0.980361	0.867307	0.113054	0
CCHCR1	HsaALTA0001601-1/2	0.952612	0.915237	0.037375	0	NA	NA	NA	NA
CCHCR1	HsaALTA0001601-2/2	0.049611	0.084982	-0.035371	0	NA	NA	NA	NA
CCHCR1	HsaALTA0001602-1/2	0.045892	0.02381	0.022082	0	0.025594	0.031458	-0.005864	0
CCHCR1	HsaALTA0001602-2/2	0.95669	0.977179	-0.020489	0	0.973264	0.970672	0.002593	0
CCL20	HsaALTA0001603-1/2	0.486017	0.482445	0.003572	0	0.482535	0.576887	-0.094352	0
CCL20	HsaALTA0001603-2/2	0.514682	0.518179	-0.003497	0	0.518166	0.425259	0.092906	0
CCNB1	HsaALTA0001608-1/3	0.009122	0.021548	-0.012427	0	0.010671	0.011949	-0.001278	0
CCNB1	HsaALTA0001608-2/3	0.98877	0.977898	0.010872	0	0.989956	0.987333	0.002623	0
CCNB1	HsaALTA0001608-3/3	0.010414	0.007985	0.002429	0	0.010823	0.011937	-0.001115	0
CCNE2	HsaALTA0001611-1/2	NA	NA	NA	NA	0.955601	0.962256	-0.006655	0
CCNE2	HsaALTA0001611-2/2	NA	NA	NA	NA	0.044266	0.039252	0.005014	0
CCNH	HsaALTA0001614-1/2	0.99087	0.988067	0.002803	0	0.980152	0.979097	0.001056	0
CCNH	HsaALTA0001614-2/2	0.008871	0.012165	-0.003294	0	0.021287	0.021854	-0.000568	0
CCNH	HsaALTA0001614-2/3	0.00956	0.011006	-0.001446	0	0.021434	0.020871	0.000563	0
CCNI	HsaALTA0001615-1/4	0.002889	0.002399	0.00049	0	0.003964	0.005249	-0.001284	0
CCNI	HsaALTA0001615-2/4	0.002755	0.002292	0.000463	0	0.004171	0.005997	-0.001826	0
CCNI	HsaALTA0001615-3/4	0.004662	0.002643	0.002019	0	0.00444	0.005525	-0.001085	0
CCNI	HsaALTA0001615-4/4	0.995301	0.997592	-0.00229	0	0.996049	0.994482	0.001567	0
CCNJ	HsaALTA0001617-1/4	0.083405	0.077196	0.006209	0	NA	NA	NA	NA
CCNJ	HsaALTA0001617-2/4	0.033302	0.04172	-0.008418	0	NA	NA	NA	NA
CCNJ	HsaALTA0001617-3/4	0.916612	0.890744	0.025868	0	NA	NA	NA	NA
CCNJ	HsaALTA0001617-4/4	0.035881	0.027582	0.008299	0	NA	NA	NA	NA
CCNL2	HsaALTA0001621-1/2	0.030608	0.067892	-0.037284	0	NA	NA	NA	NA
CCNL2	HsaALTA0001621-2/2	0.970172	0.936102	0.03407	0	NA	NA	NA	NA
CCNL2	HsaALTA0001622-1/3	0.955059	0.969114	-0.014055	0	0.965908	0.966743	-0.000835	0
CCNL2	HsaALTA0001622-2/3	0.04395	0.032145	0.011804	0	0.032201	0.034171	-0.00197	0
CCNL2	HsaALTA0001622-3/3	0.04682	0.030495	0.016325	0	0.031674	0.032781	-0.001108	0
CCNL2	HsaALTA0001623-1/5	0.00373	0.011572	-0.007842	0	0.007672	0.013143	-0.005471	0
CCNL2	HsaALTA0001623-2/5	0.003582	0.007103	-0.00352	0	0.006732	0.013283	-0.006551	0
CCNL2	HsaALTA0001623-3/5	0.975104	0.964118	0.010986	0	0.993137	0.9789	0.014238	0
CCNL2	HsaALTA0001623-4/5	0.004019	0.006842	-0.002824	0	0.007285	0.013501	-0.006216	0
CCNL2	HsaALTA0001623-5/5	0.024639	0.030608	-0.005969	0	0.007011	0.022475	-0.015464	0
CCNL2	HsaALTA0001626-1/3	0.971225	0.98482	-0.013595	0	0.977289	0.991841	-0.014552	0
CCNL2	HsaALTA0001626-2/3	0.027559	0.015113	0.012446	0	0.021517	0.008154	0.013363	0
CCNL2	HsaALTA0001626-3/3	0.004626	0.003991	0.000635	0	0.006591	0.00804	-0.001449	0
CCPG1	HsaALTA0001628-1/2	0.007845	0.010133	-0.002288	0	0.010199	0.009304	0.000894	0
CCPG1	HsaALTA0001628-2/2	0.992297	0.989863	0.002434	0	0.989979	0.991068	-0.00109	0
CCS	HsaALTA0001631-1/2	0.012641	0.00993	0.002711	0	0.016313	0.033172	-0.016859	0
CCS	HsaALTA0001631-2/2	0.98715	0.989345	-0.002196	0	0.982246	0.966612	0.015635	0
CCS	HsaALTA0001632-1/3	NA	NA	NA	NA	0.147022	0.096224	0.050798	0
CCS	HsaALTA0001632-2/3	NA	NA	NA	NA	0.861101	0.897878	-0.036777	0
CCS	HsaALTA0001632-3/3	NA	NA	NA	NA	0.039197	0.037656	0.00154	0
CCT3	HsaALTA0001633-1/2	0.010068	0.010725	-0.000657	0	0.010028	0.007365	0.002663	0
CCT3	HsaALTA0001633-2/2	0.990323	0.988983	0.00134	0	0.990025	0.993326	-0.0033	0
CCT4	HsaALTA0001634-1/2	0.036205	0.021079	0.015126	0	0.042342	0.027363	0.014979	0
CCT4	HsaALTA0001634-2/2	0.96792	0.980129	-0.012209	0	0.960718	0.969367	-0.008649	0
CCT4	HsaALTA0001635-1/2	0.001428	0.001559	-0.000131	0	0.005695	0.003068	0.002627	0
CCT4	HsaALTA0001635-2/2	0.998571	0.998513	5.8e-05	0	0.994176	0.996775	-0.0026	0
CCT5	HsaALTA0001636-1/3	0.002408	0.0022	0.000208	0	0.001902	0.001371	0.00053	0
CCT5	HsaALTA0001636-2/3	0.003723	0.003176	0.000547	0	0.001983	0.00141	0.000573	0
CCT5	HsaALTA0001636-3/3	0.99599	0.996611	-0.000622	0	0.997915	0.998601	-0.000686	0
CCT5	HsaALTA0001637-1/2	0.997705	0.998913	-0.001208	0	0.998825	0.998451	0.000374	0
CCT5	HsaALTA0001637-2/2	0.002259	0.00109	0.001169	0	0.001255	0.001692	-0.000438	0
CCT7	HsaALTA0001639-1/2	0.998805	0.999155	-0.00035	0	0.996634	0.997461	-0.000827	0
CCT7	HsaALTA0001639-2/2	0.001189	0.000826	0.000363	0	0.003175	0.002636	0.000539	0
CCT7	HsaALTA0001641-1/2	0.001166	0.000873	0.000293	0	0.000839	0.0015	-0.000662	0
CCT7	HsaALTA0001641-2/2	0.998907	0.999185	-0.000278	0	0.999234	0.998511	0.000723	0
CCT7	HsaALTA0001642-1/3	0.001225	0.001008	0.000217	0	0.002283	0.002062	0.000221	0
CCT7	HsaALTA0001642-2/3	0.998879	0.999062	-0.000183	0	0.997942	0.997836	0.000106	0
CCT7	HsaALTA0001642-3/3	0.001162	0.001017	0.000145	0	0.00218	0.001984	0.000197	0
CD151	HsaALTA0001645-1/2	0.981	0.9768	0.0042	0	NA	NA	NA	NA
CD151	HsaALTA0001645-2/2	0.017372	0.022675	-0.005303	0	NA	NA	NA	NA
CD151	HsaALTA0001645-2/3	0.017443	0.013294	0.004149	0	NA	NA	NA	NA
CD151	HsaALTA0001646-1/4	0.006582	0.003945	0.002637	0	0.011903	0.027688	-0.015785	0
CD151	HsaALTA0001646-2/4	0.007206	0.004443	0.002763	0	0.012474	0.027895	-0.015421	0
CD151	HsaALTA0001646-3/4	0.993134	0.993363	-0.000229	0	0.980566	0.971745	0.008821	0
CD151	HsaALTA0001646-4/4	0.007402	0.006799	0.000603	0	0.019513	0.027163	-0.00765	0
CD40	HsaALTA0001659-1/2	0.971962	0.97037	0.001592	0	NA	NA	NA	NA
CD40	HsaALTA0001659-2/2	0.028556	0.028191	0.000365	0	NA	NA	NA	NA
CD46	HsaALTA0001663-1/4	0.023132	0.028049	-0.004917	0	0.026314	0.040501	-0.014187	0
CD46	HsaALTA0001663-2/4	0.001995	0.001768	0.000227	0	0.003742	0.003457	0.000285	0
CD46	HsaALTA0001663-3/4	0.976862	0.971757	0.005105	0	0.972869	0.959639	0.013229	0
CD46	HsaALTA0001663-4/4	0.001947	0.001758	0.000189	0	0.003484	0.003384	9.9e-05	0
CD46	HsaALTA0001664-1/2	0.998411	0.998618	-0.000207	0	0.995676	0.996304	-0.000628	0
CD46	HsaALTA0001664-2/2	0.001507	0.001471	3.6e-05	0	0.004204	0.00373	0.000474	0
CD63	HsaALTA0001671-1/2	0.00173	0.00152	0.00021	0	0.007229	0.013746	-0.006517	0
CD63	HsaALTA0001671-2/2	0.99853	0.998397	0.000133	0	0.99313	0.985904	0.007226	0
CD63	HsaALTA0001672-1/5	0.00191	0.001427	0.000483	0	0.003485	0.003049	0.000436	0
CD63	HsaALTA0001672-2/5	0.001778	0.00163	0.000148	0	0.003395	0.002989	0.000406	0
CD63	HsaALTA0001672-3/5	0.001838	0.001474	0.000364	0	0.003947	0.002849	0.001098	0
CD63	HsaALTA0001672-4/5	0.998333	0.998399	-6.7e-05	0	0.996499	0.996863	-0.000364	0
CD63	HsaALTA0001672-5/5	0.001836	0.001399	0.000436	0	0.004146	0.00309	0.001056	0
CD63	HsaALTA0001673-1/4	0.001632	0.00126	0.000372	0	0.001471	0.001233	0.000238	0
CD63	HsaALTA0001673-2/4	0.001558	0.001314	0.000245	0	0.001501	0.001314	0.000187	0
CD63	HsaALTA0001673-3/4	0.998268	0.998876	-0.000608	0	0.998577	0.998825	-0.000249	0
CD63	HsaALTA0001673-4/4	0.001617	0.001362	0.000255	0	0.001448	0.001197	0.000251	0
CD9	HsaALTA0001679-1/3	0.022831	0.010769	0.012062	0	0.030491	0.015543	0.014948	0
CD9	HsaALTA0001679-2/3	0.977596	0.988633	-0.011037	0	0.97103	0.982882	-0.011852	0
CD9	HsaALTA0001679-3/3	0.020208	0.010879	0.009329	0	0.030264	0.015449	0.014815	0
CDADC1	HsaALTA0001681-1/2	0.091905	0.040604	0.051301	0	0.133795	0.120606	0.01319	0
CDADC1	HsaALTA0001681-2/2	0.902998	0.960007	-0.057009	0	0.862408	0.877649	-0.015241	0
CDAN1	HsaALTA0001682-1/2	0.498569	0.485408	0.013161	0	NA	NA	NA	NA
CDAN1	HsaALTA0001682-2/2	0.49372	0.521326	-0.027606	0	NA	NA	NA	NA
CDC123	HsaALTA0001683-1/2	0.990422	0.990001	0.000421	0	0.992702	0.989294	0.003408	0
CDC123	HsaALTA0001683-2/2	0.009384	0.009825	-0.000441	0	0.007834	0.01153	-0.003695	0
CDC16	HsaALTA0001686-1/2	0.066914	0.115037	-0.048123	0	0.065698	0.072197	-0.006499	0
CDC16	HsaALTA0001686-2/2	0.93372	0.878874	0.054845	0	0.934042	0.927913	0.006129	0
CDC16	HsaALTA0001687-1/5	0.066646	0.062409	0.004236	0	0.057765	0.127001	-0.069237	0
CDC16	HsaALTA0001687-2/5	0.006609	0.011632	-0.005023	0	0.028001	0.013616	0.014385	0
CDC16	HsaALTA0001687-3/5	0.007424	0.011304	-0.00388	0	0.016745	0.00882	0.007925	0
CDC16	HsaALTA0001687-4/5	0.929091	0.936201	-0.00711	0	0.928194	0.866201	0.061993	0
CDC16	HsaALTA0001687-5/5	0.011177	0.011268	-9e-05	0	0.016499	0.008147	0.008352	0
CDC16	HsaALTA0001688-1/3	0.980985	0.974348	0.006637	0	0.979045	0.951869	0.027176	0
CDC16	HsaALTA0001688-2/3	0.019939	0.025807	-0.005867	0	0.021522	0.046327	-0.024805	0
CDC16	HsaALTA0001688-3/3	0.018761	0.026871	-0.00811	0	0.021075	0.046342	-0.025267	0
CDC23	HsaALTA0001689-1/2	0.017354	0.018638	-0.001284	0	0.017738	0.015243	0.002495	0
CDC23	HsaALTA0001689-2/2	0.98289	0.983493	-0.000603	0	0.983389	0.982555	0.000833	0
CDC25A	HsaALTA0001690-1/2	0.329604	0.452952	-0.123349	0.14	0.100268	0.19175	-0.091482	0.09
CDC25A	HsaALTA0001690-2/2	0.682134	0.547192	0.134942	0	0.897768	0.802939	0.09483	0
CDC25C	HsaALTA0001692-1/3	0.048404	0.087359	-0.038955	0	NA	NA	NA	NA
CDC25C	HsaALTA0001692-2/3	0.764943	0.672532	0.092411	0.09	NA	NA	NA	NA
CDC25C	HsaALTA0001692-3/3	0.243457	0.29004	-0.046583	0	NA	NA	NA	NA
CDK13	HsaALTA0001694-1/4	0.69944	0.783128	-0.083688	0	0.894367	0.906758	-0.012391	0
CDK13	HsaALTA0001694-2/4	0.012248	0.014628	-0.00238	0	0.012317	0.032745	-0.020429	0
CDK13	HsaALTA0001694-3/4	0.299375	0.21531	0.084065	0	0.102742	0.093107	0.009635	0
CDK13	HsaALTA0001694-4/4	0.011271	0.014529	-0.003258	0	0.011965	0.030472	-0.018508	0
CDC37	HsaALTA0001696-1/3	0.006707	0.005893	0.000814	0	0.002481	0.003623	-0.001141	0
CDC37	HsaALTA0001696-2/3	0.992957	0.993507	-0.00055	0	0.99743	0.996615	0.000815	0
CDC37	HsaALTA0001696-3/3	0.007307	0.00609	0.001216	0	0.002394	0.003289	-0.000895	0
CDC37	HsaALTA0001697-1/2	0.96309	0.971749	-0.008659	0	0.981397	0.995882	-0.014485	0
CDC37	HsaALTA0001697-2/2	0.036767	0.028785	0.007982	0	0.018912	0.004091	0.014821	0
CDC37	HsaALTA0001698-1/7	0.002915	0.002536	0.000379	0	0.004547	0.009672	-0.005125	0
CDC37	HsaALTA0001698-2/7	0.002782	0.002571	0.000211	0	0.004446	0.018248	-0.013802	0
CDC37	HsaALTA0001698-3/7	0.997324	0.997187	0.000136	0	0.991915	0.981123	0.010792	0
CDC37	HsaALTA0001698-4/7	0.002945	0.002684	0.000261	0	0.004546	0.009802	-0.005256	0
CDC37	HsaALTA0001698-5/7	0.002622	0.002696	-7.4e-05	0	0.007468	0.010337	-0.002869	0
CDC37	HsaALTA0001698-6/7	0.002756	0.002574	0.000181	0	0.004613	0.010917	-0.006304	0
CDC37	HsaALTA0001698-7/7	0.00277	0.002755	1.5e-05	0	0.004691	0.0106	-0.005909	0
CDC37	HsaALTA0001699-1/2	0.002715	0.002412	0.000303	0	0.002558	0.003559	-0.001001	0
CDC37	HsaALTA0001699-2/2	0.997648	0.997726	-7.8e-05	0	0.997423	0.996985	0.000438	0
CDC37	HsaALTA0001700-1/2	0.009507	0.005305	0.004201	0	0.00747	0.003776	0.003694	0
CDC37	HsaALTA0001700-2/2	0.990202	0.994563	-0.004361	0	0.992669	0.996549	-0.00388	0
CDC42SE2	HsaALTA0001702-1/5	0.012494	0.037082	-0.024588	0	0.030209	0.025695	0.004514	0
CDC42SE2	HsaALTA0001702-2/5	0.021038	0.015351	0.005687	0	0.049803	0.025002	0.024801	0
CDC42SE2	HsaALTA0001702-3/5	0.20659	0.216487	-0.009897	0	0.155297	0.094536	0.060761	0
CDC42SE2	HsaALTA0001702-4/5	0.773613	0.742167	0.031447	0	0.816522	0.903941	-0.087419	0
CDC42SE2	HsaALTA0001702-5/5	0.023059	0.027966	-0.004908	0	0.02967	0.025859	0.003811	0
CDC45	HsaALTA0001703-1/2	0.055724	0.059124	-0.0034	0.01	NA	NA	NA	NA
CDC45	HsaALTA0001703-2/2	0.94618	0.953011	-0.006831	0	NA	NA	NA	NA
CDH16	HsaALTA0001712-1/6	NA	NA	NA	NA	0.013125	0.031008	-0.017883	0.01
CDH16	HsaALTA0001712-2/6	NA	NA	NA	NA	0.026901	0.032559	-0.005658	0
CDH16	HsaALTA0001712-3/6	NA	NA	NA	NA	0.013028	0.030239	-0.017211	0.01
CDH16	HsaALTA0001712-4/6	NA	NA	NA	NA	0.961437	0.918498	0.042938	0
CDH16	HsaALTA0001712-5/6	NA	NA	NA	NA	0.012819	0.032929	-0.020109	0.02
CDH16	HsaALTA0001712-6/6	NA	NA	NA	NA	0.020696	0.080294	-0.059599	0.06
CDK1	HsaALTA0001720-1/2	0.030441	0.026595	0.003845	0	NA	NA	NA	NA
CDK1	HsaALTA0001720-2/2	0.969519	0.972354	-0.002835	0	NA	NA	NA	NA
CDK16	HsaALTA0001725-1/3	0.013241	0.011542	0.0017	0	0.006999	0.009807	-0.002809	0
CDK16	HsaALTA0001725-2/3	0.986165	0.988879	-0.002714	0	0.993554	0.991244	0.002311	0
CDK16	HsaALTA0001725-3/3	0.005406	0.004852	0.000554	0	0.007203	0.009558	-0.002355	0
CDK16	HsaALTA0001726-1/2	0.979337	0.93802	0.041316	0	0.920608	0.850318	0.070289	0
CDK16	HsaALTA0001726-2/2	0.019435	0.061411	-0.041976	0	0.070236	0.159052	-0.088817	0
CDK16	HsaALTA0001727-1/2	0.00635	0.006489	-0.000139	0	0.010954	0.017543	-0.006589	0
CDK16	HsaALTA0001727-2/2	0.993438	0.993571	-0.000133	0	0.988818	0.982737	0.006081	0
CDK16	HsaALTA0001729-1/2	0.986357	0.993611	-0.007254	0	0.99236	0.980518	0.011842	0
CDK16	HsaALTA0001729-2/2	0.013341	0.006544	0.006797	0	0.007749	0.018283	-0.010534	0
CDK16	HsaALTA0001730-1/2	0.064876	0.052033	0.012843	0	0.045081	0.028984	0.016097	0
CDK16	HsaALTA0001730-2/2	0.939372	0.950454	-0.011082	0.01	0.946978	0.968646	-0.021668	0.02
CDK4	HsaALTA0001731-1/2	0.988814	0.993688	-0.004875	0	0.981133	0.970371	0.010763	0
CDK4	HsaALTA0001731-2/2	0.0116	0.006524	0.005076	0	0.018096	0.032822	-0.014725	0.01
CDK5RAP1	HsaALTA0001733-1/5	0.014257	0.014138	0.000119	0	0.0668	0.043316	0.023484	0
CDK5RAP1	HsaALTA0001733-2/5	0.014605	0.013018	0.001587	0	0.064265	0.042799	0.021466	0
CDK5RAP1	HsaALTA0001733-3/5	0.056536	0.014191	0.042346	0	0.110635	0.177613	-0.066978	0.06
CDK5RAP1	HsaALTA0001733-4/5	0.023308	0.023489	-0.00018	0	0.062559	0.044783	0.017776	0
CDK5RAP1	HsaALTA0001733-5/5	0.932987	0.977109	-0.044122	0	0.893479	0.820952	0.072527	0
CDK5RAP1	HsaALTA0001734-1/2	0.009121	0.011757	-0.002636	0	0.034588	0.032207	0.002381	0
CDK5RAP1	HsaALTA0001734-2/2	0.990868	0.986996	0.003872	0	0.965698	0.967751	-0.002053	0
CDK5RAP2	HsaALTA0001735-1/2	0.092536	0.149026	-0.056489	0	NA	NA	NA	NA
CDK5RAP2	HsaALTA0001735-2/2	0.911205	0.849735	0.061469	0	NA	NA	NA	NA
CDK5RAP2	HsaALTA0001736-1/2	0.988426	0.979208	0.009217	0	0.99723	0.996461	0.000769	0
CDK5RAP2	HsaALTA0001736-2/2	0.011404	0.023266	-0.011862	0	0.002639	0.003379	-0.00074	0
CDK8	HsaALTA0001739-1/3	0.016662	0.021323	-0.004661	0	0.013403	0.010704	0.002699	0
CDK8	HsaALTA0001739-2/3	0.241678	0.301008	-0.05933	0	0.223048	0.31856	-0.095513	0
CDK8	HsaALTA0001739-3/3	0.766788	0.703382	0.063405	0	0.78555	0.684497	0.101052	0
CDKAL1	HsaALTA0001742-1/2	0.042914	0.030017	0.012897	0	NA	NA	NA	NA
CDKAL1	HsaALTA0001742-2/2	0.954853	0.971821	-0.016968	0	NA	NA	NA	NA
CDKN1B	HsaALTA0001743-1/2	0.014837	0.01952	-0.004684	0	0.018371	0.025437	-0.007066	0
CDKN1B	HsaALTA0001743-2/2	0.984379	0.981515	0.002864	0	0.982793	0.9741	0.008693	0
CDKN3	HsaALTA0001746-1/2	0.096843	0.051324	0.04552	0	0.018001	0.012381	0.005621	0
CDKN3	HsaALTA0001746-2/2	0.905966	0.948478	-0.042512	0	0.982622	0.988107	-0.005484	0
CDV3	HsaALTA0001749-1/2	0.227534	0.119402	0.108132	0	0.170745	0.300459	-0.129714	0
CDV3	HsaALTA0001749-2/2	0.777717	0.882571	-0.104854	0	0.830891	0.695403	0.135489	0
CDV3	HsaALTA0001750-1/2	0.13127	0.070619	0.060651	0	0.112473	0.079127	0.033346	0
CDV3	HsaALTA0001750-2/2	0.867136	0.92809	-0.060955	0	0.888054	0.920945	-0.032891	0
CDV3	HsaALTA0001751-1/2	0.011884	0.004479	0.007405	0	0.004213	0.005942	-0.001728	0
CDV3	HsaALTA0001751-2/2	0.988219	0.995357	-0.007138	0	0.995916	0.993452	0.002464	0
CEACAM1	HsaALTA0001752-1/2	0.016279	0.013258	0.003021	0	0.022555	0.012696	0.009859	0
CEACAM1	HsaALTA0001752-2/2	0.982644	0.986726	-0.004082	0	0.977275	0.986112	-0.008837	0
CEBPZ	HsaALTA0001760-1/2	0.015085	0.015508	-0.000423	0	0.007758	0.010385	-0.002628	0
CEBPZ	HsaALTA0001760-2/2	0.986383	0.984463	0.00192	0	0.991974	0.988486	0.003488	0
CELF1	HsaALTA0001763-1/4	0.014902	0.026928	-0.012025	0	0.006086	0.004309	0.001777	0
CELF1	HsaALTA0001763-2/4	0.034505	0.068317	-0.033811	0	0.036795	0.021653	0.015142	0
CELF1	HsaALTA0001763-3/4	0.963615	0.928402	0.035214	0	0.963711	0.97781	-0.014099	0
CELF1	HsaALTA0001763-4/4	0.016701	0.026562	-0.009861	0	0.006052	0.004152	0.0019	0
CELF1	HsaALTA0001764-1/3	0.014359	0.017702	-0.003342	0	NA	NA	NA	NA
CELF1	HsaALTA0001764-2/3	0.306473	0.308678	-0.002205	0	NA	NA	NA	NA
CELF1	HsaALTA0001764-3/3	0.695574	0.687787	0.007787	0	NA	NA	NA	NA
CELF1	HsaALTA0001765-1/3	0.013923	0.017586	-0.003662	0	0.017242	0.036428	-0.019186	0
CELF1	HsaALTA0001765-2/3	0.548273	0.611722	-0.063449	0	0.60018	0.71178	-0.1116	0
CELF1	HsaALTA0001765-3/3	0.446398	0.395553	0.050845	0	0.397225	0.285841	0.111384	0
CELSR2	HsaALTA0001774-1/4	0.037606	0.050511	-0.012905	0.01	NA	NA	NA	NA
CELSR2	HsaALTA0001774-2/4	0.037396	0.056844	-0.019448	0.01	NA	NA	NA	NA
CELSR2	HsaALTA0001774-3/4	0.962185	0.942961	0.019224	0	NA	NA	NA	NA
CELSR2	HsaALTA0001774-4/4	0.039774	0.054978	-0.015204	0.01	NA	NA	NA	NA
CENPA	HsaALTA0001775-1/2	0.967496	0.946782	0.020714	0	0.947383	0.983373	-0.035991	0
CENPA	HsaALTA0001775-2/2	0.033329	0.054111	-0.020782	0	0.052693	0.016873	0.035821	0
CENPE	HsaALTA0001776-1/2	NA	NA	NA	NA	0.641257	0.625137	0.01612	0
CENPE	HsaALTA0001776-2/2	0.438076	0.34576	0.092316	0.1	0.365349	0.379936	-0.014586	0
CENPK	HsaALTA0001778-1/2	0.973827	0.974953	-0.001127	0	0.953825	0.859225	0.0946	0
CENPK	HsaALTA0001778-2/2	0.025212	0.023275	0.001938	0	0.042037	0.138242	-0.096205	0
CENPK	HsaALTA0001779-1/3	0.057672	0.143023	-0.085352	0	0.064766	0.182257	-0.117491	0
CENPK	HsaALTA0001779-2/3	0.024688	0.028319	-0.003631	0	0.027361	0.029855	-0.002494	0
CENPK	HsaALTA0001779-3/3	0.944776	0.848488	0.096288	0	0.937287	0.823525	0.113762	0
CENPO	HsaALTA0001783-1/4	0.061161	0.035354	0.025807	0	0.033083	0.07644	-0.043357	0
CENPO	HsaALTA0001783-2/4	0.94002	0.968409	-0.028389	0	0.969117	0.924357	0.04476	0
CENPO	HsaALTA0001783-3/4	0.038251	0.031713	0.006538	0	0.013301	0.018639	-0.005339	0
CENPO	HsaALTA0001783-4/4	0.036373	0.032921	0.003453	0	0.012939	0.018669	-0.005729	0
CENPO	HsaALTA0001784-1/4	0.065011	0.044744	0.020268	0	0.0357	0.072268	-0.036567	0
CENPO	HsaALTA0001784-2/4	0.044415	0.046828	-0.002414	0	0.03336	0.049904	-0.016544	0
CENPO	HsaALTA0001784-3/4	0.069365	0.041676	0.027689	0	0.032779	0.043865	-0.011086	0
CENPO	HsaALTA0001784-4/4	0.900453	0.959033	-0.058579	0	0.968007	0.921094	0.046913	0
CENPQ	HsaALTA0001785-1/3	0.045547	0.021306	0.024241	0	NA	NA	NA	NA
CENPQ	HsaALTA0001785-2/3	0.684444	0.598312	0.086132	0	NA	NA	NA	NA
CENPQ	HsaALTA0001785-3/3	0.317815	0.404262	-0.086447	0	NA	NA	NA	NA
CENPT	HsaALTA0001787-1/2	0.976342	0.981443	-0.005102	0	0.950952	0.966389	-0.015438	0
CENPT	HsaALTA0001787-2/2	0.021614	0.020238	0.001376	0	0.052932	0.03697	0.015961	0
CENPT	HsaALTA0001788-1/4	0.960763	0.904543	0.05622	0	0.99002	0.984284	0.005736	0
CENPT	HsaALTA0001788-2/4	0.041085	0.031193	0.009892	0	0.009729	0.015191	-0.005461	0
CENPT	HsaALTA0001788-3/4	0.03846	0.053417	-0.014957	0	0.01028	0.015307	-0.005027	0
CENPT	HsaALTA0001788-4/4	0.039194	0.0732	-0.034007	0	0.009307	0.016176	-0.006869	0
CENPT	HsaALTA0001789-1/4	0.054167	0.048513	0.005654	0	0.064178	0.04535	0.018828	0
CENPT	HsaALTA0001789-2/4	0.022872	0.030421	-0.007549	0	0.039136	0.046139	-0.007003	0
CENPT	HsaALTA0001789-3/4	0.947254	0.934932	0.012321	0	0.909338	0.878342	0.030996	0
CENPT	HsaALTA0001789-4/4	0.022813	0.047596	-0.024783	0	0.066659	0.122435	-0.055776	0.05
CENPW	HsaALTA0001790-1/3	0.020715	0.011721	0.008994	0	0.018902	0.007188	0.011715	0
CENPW	HsaALTA0001790-2/3	0.012254	0.01285	-0.000596	0	0.011635	0.007545	0.00409	0
CENPW	HsaALTA0001790-3/3	0.979015	0.988384	-0.00937	0	0.982311	0.992568	-0.010258	0
CNTRL	HsaALTA0001791-1/2	0.040267	0.048203	-0.007936	0	0.031129	0.039011	-0.007883	0
CNTRL	HsaALTA0001791-2/2	0.962488	0.949347	0.013141	0	0.966899	0.960401	0.006498	0
CEP164	HsaALTA0001792-1/2	NA	NA	NA	NA	0.029602	0.057453	-0.027851	0
CEP164	HsaALTA0001792-2/2	NA	NA	NA	NA	0.965543	0.939003	0.02654	0
CEP170	HsaALTA0001795-1/2	0.123767	0.036271	0.087496	0	0.044295	0.070303	-0.026008	0
CEP170	HsaALTA0001795-2/2	0.871568	0.960093	-0.088525	0	0.957598	0.926177	0.031421	0
CEP192	HsaALTA0001796-1/2	0.027969	0.036678	-0.008708	0	NA	NA	NA	NA
CEP192	HsaALTA0001796-2/2	0.971942	0.960378	0.011564	0	NA	NA	NA	NA
CEP192	HsaALTA0001797-1/2	0.395908	0.491081	-0.095173	0	NA	NA	NA	NA
CEP192	HsaALTA0001797-2/2	0.625853	0.501687	0.124166	0	NA	NA	NA	NA
CEP192	HsaALTA0001798-1/2	0.925892	0.916825	0.009067	0	NA	NA	NA	NA
CEP192	HsaALTA0001798-2/2	0.073756	0.083163	-0.009408	0	NA	NA	NA	NA
CEP250	HsaALTA0001799-1/2	0.02325	0.032793	-0.009543	0	0.030981	0.02158	0.009401	0
CEP250	HsaALTA0001799-2/2	0.977836	0.970627	0.007209	0	0.968735	0.979283	-0.010548	0
CEP250	HsaALTA0001800-1/2	0.886661	0.948981	-0.062319	0	0.972648	0.97221	0.000438	0
CEP250	HsaALTA0001800-2/2	0.113777	0.049695	0.064082	0	0.029258	0.027625	0.001633	0
CEP250	HsaALTA0001801-1/2	0.008698	0.014414	-0.005715	0	0.01028	0.006937	0.003342	0
CEP250	HsaALTA0001801-2/2	0.991148	0.986459	0.004689	0	0.990258	0.99394	-0.003683	0
CEP350	HsaALTA0001803-1/3	0.045675	0.057742	-0.012066	0	NA	NA	NA	NA
CEP350	HsaALTA0001803-2/3	0.95095	0.944948	0.006002	0	NA	NA	NA	NA
CEP350	HsaALTA0001803-3/3	0.045774	0.056172	-0.010398	0	NA	NA	NA	NA
CEP57	HsaALTA0001805-1/2	0.020239	0.029867	-0.009628	0	0.04135	0.054366	-0.013016	0.01
CEP57	HsaALTA0001805-2/2	0.982127	0.97171	0.010417	0	0.957431	0.943285	0.014145	0
CEP63	HsaALTA0001806-1/2	0.985275	0.977577	0.007698	0	0.940426	0.951666	-0.01124	0
CEP63	HsaALTA0001806-2/2	0.015042	0.021419	-0.006378	0	0.058935	0.04774	0.011194	0
CEP70	HsaALTA0001808-1/3	0.054521	0.069598	-0.015077	0	0.029824	0.05035	-0.020525	0.02
CEP70	HsaALTA0001808-2/3	0.546801	0.516274	0.030528	0	0.276534	0.486937	-0.210403	0.21
CEP70	HsaALTA0001808-3/3	0.417637	0.444686	-0.027049	0	0.724619	0.508364	0.216255	0
CEP70	HsaALTA0001809-1/3	0.046949	0.047959	-0.00101	0	NA	NA	NA	NA
CEP70	HsaALTA0001809-2/3	0.950808	0.954831	-0.004024	0	NA	NA	NA	NA
CEP70	HsaALTA0001809-3/3	0.027259	0.050997	-0.023738	0	NA	NA	NA	NA
CEP76	HsaALTA0001810-1/2	0.044452	0.030052	0.0144	0	0.063919	0.038123	0.025796	0
CEP76	HsaALTA0001810-2/2	0.958252	0.969418	-0.011166	0	0.935984	0.964718	-0.028735	0
CEP78	HsaALTA0001811-1/2	0.042986	0.055624	-0.012639	0	NA	NA	NA	NA
CEP78	HsaALTA0001811-2/2	0.956741	0.945631	0.01111	0	NA	NA	NA	NA
CEP78	HsaALTA0001812-1/2	0.902513	0.775798	0.126715	0	0.793292	0.710176	0.083117	0
CEP78	HsaALTA0001812-2/2	0.100349	0.210466	-0.110116	0	0.206191	0.29728	-0.091089	0
CEPT1	HsaALTA0001816-1/2	0.012696	0.016378	-0.003682	0	0.010981	0.026051	-0.01507	0
CEPT1	HsaALTA0001816-2/2	0.986752	0.983673	0.003079	0	0.988174	0.976354	0.01182	0
CERK	HsaALTA0001818-1/2	0.006876	0.006648	0.000227	0	0.012844	0.025861	-0.013017	0
CERK	HsaALTA0001818-2/2	0.993598	0.993289	0.000309	0	0.987269	0.975076	0.012193	0
CES1	HsaALTA0001819-1/2	0.489411	0.5046	-0.015189	0	0.47741	0.373265	0.104145	0
CES1	HsaALTA0001819-2/2	0.509432	0.495247	0.014185	0	0.523479	0.637828	-0.114349	0.12
CES1	HsaALTA0001820-1/2	0.275944	0.267533	0.008411	0	0.291701	0.283936	0.007765	0
CES1	HsaALTA0001820-2/2	0.72228	0.735993	-0.013712	0	0.708603	0.714582	-0.005978	0
CFLAR	HsaALTA0001825-1/2	0.018784	0.020114	-0.00133	0	0.049946	0.043381	0.006565	0
CFLAR	HsaALTA0001825-2/2	0.981123	0.980241	0.000883	0	0.954799	0.95527	-0.00047	0
CHAD	HsaALTA0001830-1/2	0.054506	0.054936	-0.00043	0	NA	NA	NA	NA
CHAD	HsaALTA0001830-2/2	0.946164	0.94117	0.004994	0	NA	NA	NA	NA
CHAF1B	HsaALTA0001831-1/3	0.964593	0.958864	0.00573	0	NA	NA	NA	NA
[truncated: 349,484+ more rows]
