# Supplementary material for: Competition for the conserved branch point sequence influences physiological outcomes in pre-mRNA splicing
Source: bioRxiv preprint, doi:10.1101/2024.10.09.617384, version 2 (2025-10-08)
Supplement: Suppl Table S2 [file 617384_file04.xlsx]

## Sheet: SE.MATS.JCEC
ID	GeneID	geneSymbol	chr	strand	exonStart_0base	exonEnd	upstreamES	upstreamEE	downstreamES	downstreamEE	ID	IJC_SAMPLE_1	SJC_SAMPLE_1	IJC_SAMPLE_2	SJC_SAMPLE_2	IncFormLen	SkipFormLen	PValue	FDR	IncLevel1	IncLevel2	IncLevelDifference
1707	ENSG00000100201.23	DDX17	chr22	-	38489227	38489458	38488025	38488115	38492055	38492115	1707	399,382	315,298	166,101	365,291	330	99	0	0.0	0.275,0.278	0.12,0.094	0.17
2461	ENSG00000160310.19	PRMT2	chr21	+	46636438	46636547	46635673	46635763	46636895	46636990	2461	51,58	211,165	211,142	143,123	208	99	0	0.0	0.103,0.143	0.413,0.355	-0.261
9366	ENSG00000169855.21	ROBO1	chr3	-	78647628	78647655	78646147	78646190	78651731	78651929	9366	263,305	32,22	95,57	76,54	126	99	0	0.0	0.866,0.916	0.495,0.453	0.417
9457	ENSG00000152818.19	UTRN	chr6	+	144827347	144827386	144820881	144821018	144827610	144827676	9457	445,392	498,444	609,495	39,39	138	99	0	0.0	0.391,0.388	0.918,0.901	-0.52
9520	ENSG00000112414.15	ADGRG6	chr6	+	142383759	142383843	142381950	142382019	142390257	142390343	9520	911,821	1,9	98,99	167,113	183	99	0	0.0	0.998,0.98	0.241,0.322	0.708
9526	ENSG00000112414.15	ADGRG6	chr6	+	142440907	142440953	142438211	142438364	142443336	142446261	9526	933,878	47,46	458,364	127,91	145	99	0	0.0	0.931,0.929	0.711,0.732	0.209
10534	ENSG00000151914.22	DST	chr6	-	56463045	56463156	56460130	56460254	56463564	56463764	10534	198,171	79,72	215,220	1,2	210	99	0	0.0	0.542,0.528	0.99,0.981	-0.451
10536	ENSG00000151914.22	DST	chr6	-	56468981	56468999	56466077	56466195	56469882	56469957	10536	38,37	104,98	94,91	1,0	117	99	0	0.0	0.236,0.242	0.988,1.0	-0.755
10942	ENSG00000116754.14	SRSF11	chr1	+	70231858	70231975	70228421	70228555	70232267	70232375	10942	228,249	138,129	86,55	193,160	216	99	0	0.0	0.431,0.469	0.17,0.136	0.297
14595	ENSG00000112851.16	ERBIN	chr5	+	66068876	66069020	66053405	66054951	66075023	66075230	14595	116,111	60,52	10,1	51,44	243	99	0	0.0	0.441,0.465	0.074,0.009	0.412
14596	ENSG00000112851.16	ERBIN	chr5	+	66068876	66069020	66053405	66054951	66076315	66076408	14596	79,87	0,0	7,1	16,5	243	99	0	0.0	1.0,1.0	0.151,0.075	0.887
16365	ENSG00000101199.13	ARFGAP1	chr20	+	63285979	63286218	63285653	63285713	63286365	63286442	16365	288,245	430,295	64,63	354,272	338	99	0	0.0	0.164,0.196	0.05,0.064	0.123
18465	ENSG00000100241.22	SBF1	chr22	-	50457033	50457111	50456491	50456673	50459254	50459392	18465	9,22	69,62	52,55	22,15	177	99	0	0.0	0.068,0.166	0.569,0.672	-0.504
22277	ENSG00000182149.21	IST1	chr16	+	71924090	71924281	71923287	71923380	71924768	71924817	22277	110,113	363,383	25,30	463,410	290	99	0	0.0	0.094,0.092	0.018,0.024	0.072
22619	ENSG00000198814.14	GK	chrX	+	30727465	30727552	30724100	30724181	30728731	30729249	22619	774,660	71,70	388,273	240,178	186	99	0	0.0	0.853,0.834	0.463,0.449	0.387
26113	ENSG00000273749.5	CYFIP1	chr15	-	22916881	22917029	22916482	22916630	22917787	22917935	26113	48,38	31,36	4,0	84,50	247	99	0	0.0	0.383,0.297	0.019,0.0	0.33
27058	ENSG00000125354.24	SEPTIN6	chrX	-	119625334	119625379	119618712	119618786	119629317	119629508	27058	20,21	3,2	10,7	51,27	144	99	0	0.0	0.821,0.878	0.119,0.151	0.714
27565	ENSG00000115504.15	EHBP1	chr2	+	62987930	62988038	62979187	62979335	62990715	62990840	27565	1161,1236	41,18	565,428	242,158	207	99	0	0.0	0.931,0.97	0.528,0.564	0.404
29753	ENSG00000117114.21	ADGRL2	chr1	+	81986900	81987029	81985258	81985355	81987259	81987341	29753	41,48	0,2	0,1	7,8	228	99	0	0.0	1.0,0.912	0.0,0.051	0.93
29754	ENSG00000117114.21	ADGRL2	chr1	+	81986900	81987029	81985258	81985355	81987288	81987341	29754	43,47	3,2	0,1	6,12	228	99	0	0.0	0.862,0.911	0.0,0.035	0.869
29755	ENSG00000117114.21	ADGRL2	chr1	+	81986900	81987029	81985258	81985355	81990390	81991368	29755	78,81	18,16	0,1	60,33	228	99	0	0.0	0.653,0.687	0.0,0.013	0.664
29757	ENSG00000117114.21	ADGRL2	chr1	+	81987259	81987341	81986900	81987029	81990390	81992180	29757	1,9	37,34	12,11	0,0	181	99	0	0.0	0.015,0.126	1.0,1.0	-0.929
30850	ENSG00000079819.19	EPB41L2	chr6	-	130878103	130878250	130869562	130870126	130885095	130885268	30850	50,60	370,290	83,88	133,105	246	99	0	0.0	0.052,0.077	0.201,0.252	-0.162
31873	ENSG00000127054.22	INTS11	chr1	-	1322891	1323287	1320995	1321093	1324580	1324613	31873	61,44	91,66	8,7	113,105	495	99	0	0.0	0.118,0.118	0.014,0.013	0.104
34949	ENSG00000117143.14	UAP1	chr1	+	162592731	162592782	162590322	162590511	162597791	162597858	34949	37,43	255,307	234,157	133,107	150	99	0	0.0	0.087,0.085	0.537,0.492	-0.428
36785	ENSG00000117868.18	ESYT2	chr7	-	158752780	158752843	158749648	158749723	158759485	158759581	36785	122,128	30,23	52,39	156,127	162	99	0	0.0	0.713,0.773	0.169,0.158	0.58
40101	ENSG00000039560.14	RAI14	chr5	+	34813573	34813660	34812179	34812208	34814582	34814669	40101	92,102	1,0	48,30	22,15	186	99	0	0.0	0.98,1.0	0.537,0.516	0.464
40507	ENSG00000144674.18	GOLGA4	chr3	+	37361242	37361305	37355100	37355187	37366079	37366669	40507	305,302	46,31	89,81	96,101	162	99	0	0.0	0.802,0.856	0.362,0.329	0.483
40664	ENSG00000071054.17	MAP4K4	chr2	+	101860824	101860986	101859642	101859864	101864929	101865036	40664	1104,1201	168,172	215,156	200,159	261	99	0	0.0	0.714,0.726	0.29,0.271	0.44
41026	ENSG00000138095.20	LRPPRC	chr2	-	43957725	43957957	43957384	43957451	43960540	43960634	41026	68,84	319,334	22,15	549,417	331	99	0	0.0	0.06,0.07	0.012,0.011	0.054
41423	ENSG00000169764.16	UGP2	chr2	+	63842058	63842204	63840953	63841232	63856305	63856433	41423	118,134	220,240	442,282	179,164	245	99	0	0.0	0.178,0.184	0.499,0.41	-0.274
41675	ENSG00000111790.14	FGFR1OP2	chr12	+	26960514	26960628	26957600	26957743	26963341	26963455	41675	32,27	61,64	100,70	15,19	213	99	0	0.0	0.196,0.164	0.756,0.631	-0.514
42830	ENSG00000136068.16	FLNB	chr3	+	58141857	58141896	58138281	58138529	58142649	58142752	42830	45,39	441,426	160,137	292,212	138	99	0	0.0	0.068,0.062	0.282,0.317	-0.234
42831	ENSG00000136068.16	FLNB	chr3	+	58141857	58141929	58138281	58138529	58142649	58142752	42831	114,103	441,426	401,313	292,212	171	99	0	0.0	0.13,0.123	0.443,0.461	-0.326
43268	ENSG00000104635.15	SLC39A14	chr8	+	22409945	22410115	22408309	22408496	22412036	22412206	43268	44,25	367,344	226,188	412,278	269	99	0	0.0	0.042,0.026	0.168,0.199	-0.149
43271	ENSG00000104635.15	SLC39A14	chr8	+	22412036	22412206	22409945	22410115	22414779	22414902	43271	1180,1098	8,4	1375,871	118,56	269	99	0	0.0	0.982,0.99	0.811,0.851	0.155
43605	ENSG00000150527.18	MIA2	chr14	+	39320927	39321056	39319208	39319291	39326863	39327022	43605	923,938	55,46	830,568	186,137	228	99	0	0.0	0.879,0.899	0.66,0.643	0.238
45473	ENSG00000196504.21	PRPF40A	chr2	-	152679055	152679109	152677450	152677475	152679351	152679472	45473	384,292	122,146	400,298	25,21	153	99	0	0.0	0.671,0.564	0.912,0.902	-0.29
45998	ENSG00000077380.16	DYNC1I2	chr2	+	171712766	171712826	171706889	171707377	171715327	171715350	45998	46,46	279,279	0,1	278,241	159	99	0	0.0	0.093,0.093	0.0,0.003	0.091
47064	ENSG00000107679.15	PLEKHA1	chr10	+	122428275	122428316	122426941	122427031	122429623	122432345	47064	33,23	173,156	109,73	75,51	140	99	0	0.0	0.119,0.094	0.507,0.503	-0.399
47629	ENSG00000115414.21	FN1	chr2	-	215380810	215381080	215379129	215379317	215382211	215382325	47629	59651,57189	974,927	49465,39302	4515,3745	369	99	0	0.0	0.943,0.943	0.746,0.738	0.201
47636	ENSG00000115414.21	FN1	chr2	-	215392930	215393203	215391631	215391814	215394527	215394719	47636	22841,22803	13292,13249	7254,5329	17468,15494	372	99	0	0.0	0.314,0.314	0.1,0.084	0.222
55350	ENSG00000169398.20	PTK2	chr8	-	140669726	140669735	140668268	140668424	140674297	140674404	55350	44,54	206,169	0,1	220,175	108	99	0	0.0	0.164,0.227	0.0,0.005	0.193
60794	ENSG00000088448.14	ANKRD10	chr13	-	110900529	110900694	110893196	110893263	110906032	110906124	60794	114,80	46,37	50,28	122,67	264	99	0	0.0	0.482,0.448	0.133,0.135	0.331
60799	ENSG00000138326.21	RPS24	chr10	+	78037438	78040225	78037193	78037304	78040614	78040716	60799	1845,1917	2029,2048	1166,1062	4137,2981	2886	99	0	0.0	0.03,0.031	0.01,0.012	0.019
60870	ENSG00000138674.17	SEC31A	chr4	-	82861630	82861708	82857688	82857764	82863317	82863392	60870	239,271	76,88	119,88	416,303	177	99	0	0.0	0.638,0.633	0.138,0.14	0.496
60871	ENSG00000138674.17	SEC31A	chr4	-	82862533	82862572	82857688	82857764	82863317	82863392	60871	104,105	76,88	91,94	416,303	138	99	0	0.0	0.495,0.461	0.136,0.182	0.319
65521	ENSG00000073921.18	PICALM	chr11	-	85978069	85978093	85976622	85976682	85981128	85981228	65521	58,48	245,205	219,152	80,46	123	99	0	0.0	0.16,0.159	0.688,0.727	-0.548
65523	ENSG00000073921.18	PICALM	chr11	-	85990249	85990378	85983865	85983973	85996825	85996929	65523	242,251	100,79	47,50	159,124	228	99	0	0.0	0.512,0.58	0.114,0.149	0.415
65524	ENSG00000073921.18	PICALM	chr11	-	85990249	85990399	85983865	85983973	85996825	85996929	65524	463,430	100,79	106,91	159,124	249	99	0	0.0	0.648,0.684	0.21,0.226	0.448
66372	ENSG00000079385.23	CEACAM1	chr19	-	42511575	42511628	42510888	42510920	42512349	42512411	66372	192,140	19,11	199,154	178,151	152	99	0	0.0	0.868,0.892	0.421,0.399	0.47
66980	ENSG00000060237.19	WNK1	chr12	+	879572	880031	877093	878361	881691	881789	66980	386,270	41,32	61,46	109,75	558	99	0	0.0	0.626,0.6	0.09,0.098	0.519
66981	ENSG00000060237.19	WNK1	chr12	+	880720	880999	878211	878361	881691	881789	66981	565,497	41,32	149,140	109,75	378	99	0	0.0	0.783,0.803	0.264,0.328	0.497
68035	ENSG00000143924.19	EML4	chr2	+	42261120	42261294	42256500	42256630	42263177	42263306	68035	3441,3311	283,236	2253,1706	4,4	273	99	0	0.0	0.815,0.836	0.995,0.994	-0.169
68951	ENSG00000068078.20	FGFR3	chr4	+	1803691	1803836	1802913	1803064	1804329	1804520	68951	800,606	33,16	427,299	98,96	244	99	0	0.0	0.908,0.939	0.639,0.558	0.325
71330	ENSG00000148700.15	ADD3	chr10	+	110132304	110132400	110130362	110130486	110133325	110135565	71330	306,288	1,3	73,48	93,58	195	99	0	0.0	0.994,0.98	0.285,0.296	0.697
72039	ENSG00000095637.23	SORBS1	chr10	-	95414493	95414655	95410632	95410777	95421960	95422073	72039	7,2	104,92	34,24	36,20	261	99	0	0.0	0.025,0.008	0.264,0.313	-0.272
72041	ENSG00000095637.23	SORBS1	chr10	-	95414493	95414862	95410632	95410777	95421960	95422073	72041	29,11	104,92	96,56	36,20	468	99	0	0.0	0.056,0.025	0.361,0.372	-0.326
72692	ENSG00000174373.17	RALGAPA1	chr14	-	35548507	35548538	35538351	35539690	35549109	35549234	72692	72,46	162,160	203,158	8,8	130	99	0	0.0	0.253,0.18	0.951,0.938	-0.728
73388	ENSG00000133961.21	NUMB	chr14	-	73316389	73316422	73297210	73297285	73323129	73323204	73388	17,14	107,134	75,48	80,40	132	99	0	0.0	0.106,0.073	0.413,0.474	-0.354
74220	ENSG00000203485.14	INF2	chr14	+	104715283	104715340	104714202	104714856	104718794	104719603	74220	10,4	58,24	55,58	12,14	156	99	0	0.0	0.099,0.096	0.744,0.724	-0.636
75425	ENSG00000140262.18	TCF12	chr15	+	57252420	57252492	57251168	57251423	57253261	57253468	75425	68,60	40,46	3,5	76,48	171	99	0	0.0	0.496,0.43	0.022,0.057	0.423
76488	ENSG00000196535.19	MYO18A	chr17	-	29085603	29085648	29082315	29082438	29086437	29086577	76488	10,10	301,277	68,71	124,88	144	99	0	0.0	0.022,0.024	0.274,0.357	-0.292
77716	ENSG00000102893.18	PHKB	chr16	+	47463881	47463993	47461294	47461426	47497398	47497488	77716	320,311	23,31	85,67	64,68	211	99	0	0.0	0.867,0.825	0.384,0.316	0.496
77717	ENSG00000102893.18	PHKB	chr16	+	47463898	47463993	47461122	47461426	47497398	47497488	77717	377,428	23,31	95,100	64,68	194	99	0	0.0	0.893,0.876	0.431,0.429	0.455
77878	ENSG00000117859.19	OSBPL9	chr1	+	51756319	51756358	51750144	51750195	51760689	51760764	77878	86,109	112,147	274,206	62,27	138	99	0	0.0	0.355,0.347	0.76,0.846	-0.452
79048	ENSG00000082269.17	FAM135A	chr6	+	70486166	70486244	70482000	70482154	70491033	70491083	79048	13,19	19,21	42,31	1,0	177	99	0	0.0	0.277,0.336	0.959,1.0	-0.673
79523	ENSG00000166579.16	NDEL1	chr17	+	8463319	8463354	8460008	8460160	8466929	8467658	79523	2,7	91,82	46,52	63,40	134	99	0	0.0	0.016,0.059	0.35,0.49	-0.383
81447	ENSG00000183077.16	AFMID	chr17	+	78205602	78205738	78202702	78202751	78205945	78206050	81447	304,288	284,268	143,140	523,402	235	99	0	0.0	0.311,0.312	0.103,0.128	0.196
39586	ENSG00000132694.19	ARHGEF11	chr1	-	156971696	156971816	156969997	156970043	156976982	156977054	39586	38,49	8,13	20,12	26,14	219	99	8.47938748993e-07	0.000102514357569	0.682,0.63	0.258,0.279	0.388
48541	ENSG00000165526.9	RPUSD4	chr11	-	126206253	126206553	126205718	126205781	126209520	126209723	48541	16,33	72,68	9,10	130,97	399	99	8.54456985055e-07	0.000103052878553	0.052,0.107	0.017,0.025	0.058
58120	ENSG00000165219.23	GAPVD1	chr9	+	125263550	125263700	125261830	125261959	125287761	125287883	58120	8,4	3,3	2,2	0,0	249	99	8.63834263787e-07	0.000103932791868	0.515,0.346	1.0,1.0	-0.57
54457	ENSG00000120963.12	ZNF706	chr8	-	101202332	101202447	101201606	101201743	101205434	101205732	54457	37,55	201,172	9,12	141,145	214	99	9.00267890791e-07	0.000108055952055	0.078,0.129	0.029,0.037	0.071
66356	ENSG00000149591.17	TAGLN	chr11	+	117199632	117199829	117199381	117199432	117203001	117203193	66356	8,8	12,6	1,2	24,30	296	99	9.47598358336e-07	0.000113192664187	0.182,0.308	0.014,0.022	0.227
83018	ENSG00000130158.14	DOCK6	chr19	-	11229297	11229390	11228939	11229035	11232184	11232289	83018	16,10	7,4	4,4	17,18	192	99	9.47592202927e-07	0.000113192664187	0.541,0.563	0.108,0.103	0.447
64303	ENSG00000124920.14	MYRF	chr11	+	61769259	61769321	61765957	61766221	61771499	61771750	64303	11,11	0,0	8,8	2,8	161	99	9.54817447663e-07	0.000113782792313	1.0,1.0	0.711,0.381	0.454
57015	ENSG00000119139.21	TJP2	chr9	+	69234438	69234547	69229735	69230232	69236027	69236032	57015	1533,1376	11,8	802,595	27,11	208	99	9.62531310655e-07	0.000114428930648	0.985,0.988	0.934,0.963	0.038
58873	ENSG00000107186.17	MPDZ	chr9	-	13143465	13143564	13139986	13140149	13147547	13147658	58873	11,11	9,5	2,0	13,9	198	99	9.6501987068e-07	0.000114452273546	0.379,0.524	0.071,0.0	0.416
26097	ENSG00000132677.13	RHBG	chr1	+	156381346	156381513	156369210	156369436	156382747	156382869	26097	248,233	14,10	151,112	33,17	266	99	9.6826138396e-07	0.000114564595172	0.868,0.897	0.63,0.71	0.213
31617	ENSG00000087087.20	SRRT	chr7	+	100882457	100883090	100882052	100882241	100884069	100884239	31617	80,70	19,17	65,38	52,32	732	99	9.86050343599e-07	0.000116393569045	0.363,0.358	0.145,0.138	0.219
1668	ENSG00000284431.1	ENSG00000284431	chr22	+	40348396	40348646	40346528	40346711	40349831	40350035	1668	15,19	121,103	5,3	193,148	349	99	9.92648226616e-07	0.000116620984949	0.034,0.05	0.007,0.006	0.036
17236	ENSG00000139187.10	KLRG1	chr12	+	8992205	8992310	8950043	8950236	9008974	9009075	17236	1,0	2,1	1,3	0,0	204	99	9.91512430826e-07	0.000116620984949	0.195,0.0	1.0,1.0	-0.902
26067	ENSG00000132677.13	RHBG	chr1	+	156374606	156374729	156369211	156369436	156382747	156382869	26067	158,172	14,10	81,73	33,17	222	99	1.00430916461e-06	0.000117362585303	0.834,0.885	0.523,0.657	0.269
67973	ENSG00000134294.14	SLC38A2	chr12	-	46370511	46370627	46367266	46367340	46370775	46370857	67973	4708,4225	127,110	4457,3097	45,48	215	99	1.00268964087e-06	0.000117362585303	0.945,0.946	0.979,0.967	-0.027
69586	ENSG00000151612.18	ZNF827	chr4	-	145763089	145763122	145757626	145761598	145764974	145765165	69586	3,0	4,1	1,2	0,0	132	99	1.00601202679e-06	0.000117362585303	0.36,0.0	1.0,1.0	-0.82
81121	ENSG00000227036.10	LINC00511	chr17	-	72323742	72324150	72323138	72323320	72324431	72324651	81121	6,13	3,2	3,5	0,0	507	99	1.01925261953e-06	0.000118630075864	0.281,0.559	1.0,1.0	-0.58
64918	ENSG00000160172.10	FAM86C2P	chr11	-	67799373	67799475	67796682	67796833	67803001	67803064	64918	3,3	0,0	0,1	1,2	201	99	1.05527475092e-06	0.0001225370316	1.0,1.0	0.0,0.198	0.901
39519	ENSG00000160752.15	FDPS	chr1	+	155309788	155309965	155308865	155308965	155312254	155312395	39519	246,203	8,9	204,164	33,21	276	99	1.08591210979e-06	0.000125802036088	0.917,0.89	0.689,0.737	0.191
19325	ENSG00000196526.11	AFAP1	chr4	-	7781375	7781627	7778761	7778876	7786193	7786311	19325	11,9	6,9	0,0	7,5	351	99	1.09528113235e-06	0.000126593708841	0.341,0.22	0.0,0.0	0.281
55933	ENSG00000250337.9	PURPL	chr5	+	27494234	27494335	27477638	27477801	27495948	27496395	55933	4,5	0,0	12,4	7,1	200	99	1.10039701628e-06	0.000126891278106	1.0,1.0	0.459,0.664	0.439
45056	ENSG00000186910.4	SERPINA11	chr14	-	94446330	94446604	94443077	94443225	94448131	94448777	45056	2869,2647	42,42	5520,4123	34,22	373	99	1.1098853856e-06	0.000127690523476	0.948,0.944	0.977,0.98	-0.032
59683	ENSG00000095787.25	WAC	chr10	+	28611254	28611481	28610698	28610821	28611773	28611922	59683	57,75	270,294	19,27	288,230	326	99	1.11980333484e-06	0.000128535403016	0.06,0.072	0.02,0.034	0.039
49964	ENSG00000106701.13	FSD1L	chr9	+	105479353	105479376	105471903	105472005	105484380	105484502	49964	6,9	4,9	0,0	8,1	122	99	1.13651633971e-06	0.000130154581096	0.549,0.448	0.0,0.0	0.499
54284	ENSG00000169439.12	SDC2	chr8	+	96529192	96529271	96493812	96494043	96537299	96537425	54284	2,2	2,3	3,3	0,0	178	99	1.25705458287e-06	0.000143629273175	0.357,0.27	1.0,1.0	-0.686
20319	ENSG00000172456.18	FGGY	chr1	+	59321535	59321750	59296794	59296907	59339957	59340069	20319	69,75	0,1	45,30	6,5	314	99	1.27986864529e-06	0.000145902103489	1.0,0.959	0.703,0.654	0.301
65855	ENSG00000149231.16	CCDC82	chr11	-	96387529	96387613	96383961	96384761	96389843	96389865	65855	22,16	8,6	8,16	0,0	183	99	1.30718909563e-06	0.000148677126956	0.598,0.591	1.0,1.0	-0.405
41871	ENSG00000066651.20	TRMT11	chr6	+	126115344	126115493	126114704	126114739	126115742	126115855	41871	8,3	1,0	2,0	2,4	248	99	1.31486859711e-06	0.000149210690732	0.762,1.0	0.285,0.0	0.739
52836	ENSG00000136699.20	SMPD4	chr2	-	130161185	130161272	130157250	130157396	130164373	130164445	52836	153,137	36,38	114,79	70,57	186	99	1.31948621174e-06	0.000149395161085	0.693,0.657	0.464,0.425	0.231
56075	ENSG00000167780.12	SOAT2	chr12	+	53105560	53105620	53105106	53105243	53105906	53106014	56075	244,232	93,84	90,85	82,68	159	99	1.32749693482e-06	0.00014973091026	0.62,0.632	0.406,0.438	0.204
66432	ENSG00000137700.19	SLC37A4	chr11	-	119026505	119026688	119025966	119026080	119026936	119027095	66432	158,118	79,48	137,90	135,103	282	99	1.3284491247e-06	0.00014973091026	0.412,0.463	0.263,0.235	0.189
75469	ENSG00000175416.16	CLTB	chr5	-	176396478	176396532	176392500	176392945	176397606	176397718	75469	19,8	138,135	0,0	118,75	153	99	1.33411614855e-06	0.000150030976156	0.082,0.037	0.0,0.0	0.059
33011	ENSG00000147394.20	ZNF185	chrX	+	152928574	152928661	152922719	152922809	152931671	152931776	33011	3,7	3,3	5,6	0,0	186	99	1.34124774753e-06	0.000150156594803	0.347,0.554	1.0,1.0	-0.549
54083	ENSG00000155100.11	OTUD6B	chr8	+	91076591	91076731	91073830	91073911	91078355	91078668	54083	19,16	21,28	2,1	20,20	239	99	1.34040164412e-06	0.000150156594803	0.273,0.191	0.04,0.02	0.202
36869	ENSG00000166171.13	DPCD	chr10	+	101605139	101605212	101601202	101601336	101609366	101609447	36869	3,1	0,0	3,2	4,1	172	99	1.347417941e-06	0.000150509899803	1.0,1.0	0.302,0.535	0.582
48189	ENSG00000135541.22	AHI1	chr6	-	135495312	135495898	135492227	135492291	135497187	135497249	48189	7,15	3,7	0,0	5,4	685	99	1.3733573071e-06	0.000153064963618	0.252,0.236	0.0,0.0	0.244
29748	ENSG00000117114.21	ADGRL2	chr1	+	81952986	81953025	81951956	81952142	81955876	81956060	29748	17,13	46,32	4,3	72,47	138	99	1.38291571683e-06	0.000153787003691	0.21,0.226	0.038,0.044	0.177
42221	ENSG00000080822.17	CLDND1	chr3	-	98521652	98521703	98521132	98521442	98522848	98522875	42221	11,23	124,144	2,6	232,120	150	99	1.38727627585e-06	0.000153929092732	0.055,0.095	0.006,0.032	0.056
27056	ENSG00000125354.24	SEPTIN6	chrX	-	119625334	119625379	119615723	119616742	119629317	119629508	27056	17,20	0,0	5,4	4,2	144	99	1.40628790779e-06	0.000155692597614	1.0,1.0	0.462,0.579	0.48
58186	ENSG00000136828.19	RALGPS1	chr9	+	127199014	127199066	127196473	127196631	127210694	127210778	58186	0,2	2,2	5,6	0,0	151	99	1.45564301635e-06	0.000160800246569	0.0,0.396	1.0,1.0	-0.802
65770	ENSG00000182919.15	C11orf54	chr11	+	93741962	93742066	93741656	93741728	93747296	93747448	65770	24,34	129,154	18,8	251,182	203	99	1.46608334139e-06	0.000161596042647	0.083,0.097	0.034,0.021	0.062
33009	ENSG00000147394.20	ZNF185	chrX	+	152922719	152922809	152922172	152922256	152931671	152931776	33009	7,6	0,0	1,0	1,2	189	99	1.5055144037e-06	0.000165576739408	1.0,1.0	0.344,0.0	0.828
27670	ENSG00000162341.18	TPCN2	chr11	+	69054720	69054797	69054032	69054097	69057577	69057694	27670	6,5	0,0	7,1	5,1	176	99	1.54081018389e-06	0.000169086139103	1.0,1.0	0.441,0.36	0.6
28435	ENSG00000135486.19	HNRNPA1	chr12	+	54285973	54286112	54284257	54284317	54286661	54286732	28435	71,66	71,78	33,19	100,59	238	99	1.56188909817e-06	0.000171023431054	0.294,0.26	0.121,0.118	0.158
67137	ENSG00000090487.11	SPG21	chr15	-	64988618	64988816	64983506	64983593	64989405	64989496	67137	6,9	1,5	5,2	0,0	297	99	1.57668838408e-06	0.000172266143776	0.667,0.375	1.0,1.0	-0.479
35263	ENSG00000143742.14	SRP9	chr1	+	225786861	225786985	225783299	225783368	225789239	225790466	35263	216,212	418,424	189,131	715,475	223	99	1.60663586501e-06	0.000175154880733	0.187,0.182	0.105,0.109	0.077
69258	ENSG00000124155.19	PIGT	chr20	+	45416516	45418979	45416126	45416343	45419294	45419395	69258	1530,1475	6,2	908,668	12,13	2562	99	1.62057108555e-06	0.000176289182729	0.908,0.966	0.745,0.665	0.232
58749	ENSG00000197165.11	SULT1A2	chr16	-	28593251	28593346	28592262	28592481	28596996	28597050	58749	17,21	2,6	16,11	26,22	194	99	1.6413982078e-06	0.000177780160333	0.813,0.641	0.239,0.203	0.506
71325	ENSG00000148700.15	ADD3	chr10	+	110105999	110106053	110100624	110100848	110112776	110112894	71325	12,13	121,146	0,0	137,82	153	99	1.64091927124e-06	0.000177780160333	0.06,0.054	0.0,0.0	0.057
8846	ENSG00000122550.18	KLHL7	chr7	+	23117833	23117964	23106297	23106794	23123776	23123879	8846	5,2	4,1	6,12	0,0	230	99	1.6557946273e-06	0.000178951258735	0.35,0.463	1.0,1.0	-0.594
30075	ENSG00000144504.16	ANKMY1	chr2	-	240511860	240512001	240500451	240500565	240512801	240512942	30075	7,10	6,1	0,0	6,1	240	99	1.66423930548e-06	0.00017947544873	0.325,0.805	0.0,0.0	0.565
47322	ENSG00000102710.21	SUPT20H	chr13	-	37010551	37010655	37009311	37009809	37012191	37012297	47322	79,97	30,31	57,30	56,34	203	99	1.70514213671e-06	0.000183490198336	0.562,0.604	0.332,0.301	0.266
35594	ENSG00000143374.18	TARS2	chr1	+	150491597	150491662	150491393	150491511	150492410	150492489	35594	71,81	0,0	93,54	6,9	164	99	1.7137076187e-06	0.000184015344321	1.0,1.0	0.903,0.784	0.156
3075	ENSG00000101187.16	SLCO4A1	chr20	+	62668011	62668184	62667744	62667910	62668476	62668541	3075	186,126	7,3	234,208	35,26	272	99	1.73591486574e-06	0.000185999925239	0.906,0.939	0.709,0.744	0.196
69259	ENSG00000124155.19	PIGT	chr20	+	45418771	45418979	45416312	45416343	45419294	45419395	69259	836,824	6,2	509,357	12,13	307	99	1.75608579756e-06	0.000187758286848	0.978,0.993	0.932,0.899	0.07
17882	ENSG00000197694.18	SPTAN1	chr9	+	128592982	128593042	128591476	128591625	128594174	128594373	17882	163,163	113,105	69,69	107,101	159	99	1.77270514423e-06	0.000188969852699	0.473,0.492	0.286,0.298	0.191
56005	ENSG00000123415.16	SMUG1	chr12	-	54187818	54187905	54183655	54183959	54188514	54188596	56005	21,22	6,6	20,15	0,0	186	99	1.77735045381e-06	0.000188969852699	0.651,0.661	1.0,1.0	-0.344
66434	ENSG00000137700.19	SLC37A4	chr11	-	119026602	119026688	119025190	119026080	119026936	119027095	66434	262,221	79,48	251,165	135,103	185	99	1.77877131979e-06	0.000188969852699	0.64,0.711	0.499,0.462	0.195
3745	ENSG00000088367.23	EPB41L1	chr20	+	36209487	36209898	36197858	36198041	36212271	36212376	3745	282,276	205,169	382,234	119,86	510	99	1.80325588695e-06	0.000189954366437	0.211,0.241	0.384,0.346	-0.139
14428	ENSG00000113048.19	MRPS27	chr5	-	72227049	72227275	72226056	72226199	72228265	72228368	14428	32,27	171,172	7,21	283,254	325	99	1.7987269576e-06	0.000189954366437	0.054,0.046	0.007,0.025	0.034
35704	ENSG00000231925.14	TAPBP	chr6	-	33304127	33304217	33299860	33301771	33304296	33304530	35704	203,162	2,3	69,97	13,7	189	99	1.80145107243e-06	0.000189954366437	0.982,0.966	0.735,0.879	0.167
43037	ENSG00000243147.8	MRPL33	chr2	+	27774423	27774530	27772673	27772692	27779432	27779697	43037	1135,1097	485,493	907,642	627,532	206	99	1.80198794109e-06	0.000189954366437	0.529,0.517	0.41,0.367	0.135
61020	ENSG00000196693.15	ZNF33B	chr10	-	42636919	42636972	42632294	42632439	42638473	42638521	61020	181,143	7,1	222,141	25,19	152	99	1.83404404652e-06	0.000192790849025	0.944,0.989	0.853,0.829	0.125
28743	ENSG00000077782.22	FGFR1	chr8	-	38423024	38423175	38421796	38421941	38424508	38424699	28743	15,21	33,46	8,7	90,70	250	99	1.85777002171e-06	0.000194874611248	0.153,0.153	0.034,0.038	0.117
22058	ENSG00000139112.11	GABARAPL1	chr12	+	10213835	10214187	10212892	10213219	10218062	10218141	22058	32,22	77,80	5,5	80,55	451	99	1.88219633945e-06	0.000196610764488	0.084,0.057	0.014,0.02	0.054
69263	ENSG00000124155.19	PIGT	chr20	+	45418851	45418979	45416122	45416343	45419294	45419395	69263	832,821	6,2	507,355	12,13	227	99	1.88095097808e-06	0.000196610764488	0.984,0.994	0.949,0.923	0.053
26084	ENSG00000132677.13	RHBG	chr1	+	156377989	156378399	156369211	156369436	156382747	156382869	26084	455,342	14,10	256,196	33,17	509	99	1.90192372662e-06	0.000198256688087	0.863,0.869	0.601,0.692	0.22
65951	ENSG00000138303.18	ASCC1	chr10	-	72215781	72216109	72213186	72213331	72216206	72216275	65951	112,86	62,71	43,36	89,54	427	99	1.91918049786e-06	0.000199638752997	0.295,0.219	0.101,0.134	0.14
36492	ENSG00000057757.10	PITHD1	chr1	+	23779437	23779481	23778417	23778713	23779863	23779941	36492	40,53	1,0	43,18	9,4	143	99	1.93607996068e-06	0.000200977980284	0.965,1.0	0.768,0.757	0.22
80144	ENSG00000278259.5	MYO19	chr17	-	36501851	36501901	36501068	36501235	36503096	36503200	80144	7,12	67,60	0,0	63,52	149	99	1.95379424983e-06	0.000202396059519	0.065,0.117	0.0,0.0	0.091
48469	ENSG00000100445.18	SDR39U1	chr14	-	24442177	24442260	24440782	24440926	24442345	24442448	48469	97,84	0,0	96,100	11,5	182	99	1.98720756139e-06	0.000205061411522	1.0,1.0	0.826,0.916	0.129
81590	ENSG00000169727.13	GPS1	chr17	+	82052374	82052459	82051499	82051524	82053273	82053366	81590	39,21	11,12	24,19	52,39	184	99	1.98773754134e-06	0.000205061411522	0.656,0.485	0.199,0.208	0.367
9184	ENSG00000060762.19	MPC1	chr6	-	166366968	166367184	166366794	166366891	166370217	166370221	9184	150,124	404,410	121,70	621,497	315	99	2.01395824539e-06	0.000207338039486	0.104,0.087	0.058,0.042	0.045
69542	ENSG00000154710.18	RABGEF1	chr7	+	66739995	66740792	66712166	66712224	66771882	66772078	69542	219,191	10,4	186,137	0,0	896	99	2.03823951961e-06	0.000209406044143	0.708,0.841	1.0,1.0	-0.226
72465	ENSG00000145545.12	SRD5A1	chr5	+	6644807	6645309	6633426	6633869	6651841	6652008	72465	7,0	36,22	7,17	10,6	601	99	2.04513602153e-06	0.000209683134889	0.031,0.0	0.103,0.318	-0.195
46540	ENSG00000049618.24	ARID1B	chr6	+	157150724	157150853	157148623	157148951	157167039	157167185	46540	16,18	53,43	2,3	49,46	228	99	2.09151389008e-06	0.000213998729602	0.116,0.154	0.017,0.028	0.113
55044	ENSG00000254166.4	CASC19	chr8	-	127197474	127197564	127168421	127169117	127218809	127219237	55044	0,1	8,8	6,5	4,1	189	99	2.10023959069e-06	0.00021445207158	0.0,0.061	0.44,0.724	-0.551
14617	ENSG00000154380.19	ENAH	chr1	-	225504990	225505053	225500991	225501070	225507950	225508017	14617	118,100	107,130	162,91	66,47	162	99	2.11322319799e-06	0.000215337443875	0.403,0.32	0.6,0.542	-0.209
73364	ENSG00000148660.22	CAMK2G	chr10	-	73818208	73818895	73817478	73817554	73819531	73819645	73364	30,36	23,33	9,4	28,25	786	99	2.1261246439e-06	0.000216210854571	0.141,0.121	0.039,0.02	0.102
39876	ENSG00000059377.18	TBXAS1	chr7	+	139782665	139782729	139777050	139777241	139787337	139787426	39876	5,8	0,0	0,2	3,1	163	99	2.13168709906e-06	0.000216335911673	1.0,1.0	0.0,0.548	0.726
71802	ENSG00000175711.9	B3GNTL1	chr17	-	82960358	82960486	82957358	82957494	82961056	82961332	71802	14,17	18,19	1,1	13,14	227	99	2.15725498387e-06	0.000218486609736	0.253,0.281	0.032,0.03	0.236
11015	ENSG00000111319.13	SCNN1A	chr12	-	6356192	6356394	6355776	6355880	6362050	6362241	11015	64,55	219,195	3,8	64,82	301	99	2.16877832138e-06	0.000219209049322	0.088,0.085	0.015,0.031	0.064
39220	ENSG00000119185.13	ITGB1BP1	chr2	-	9419989	9420100	9418625	9418732	9422965	9423176	39220	32,42	0,0	23,21	3,6	210	99	2.24688198569e-06	0.000226644574601	1.0,1.0	0.783,0.623	0.297
30111	ENSG00000155366.17	RHOC	chr1	-	112705099	112706252	112703643	112703806	112707077	112707127	30111	322,317	127,115	176,160	140,118	1252	99	2.28252659384e-06	0.000229775877736	0.167,0.179	0.09,0.097	0.079
63757	ENSG00000214413.9	BBIP1	chr10	-	110910749	110911039	110901537	110901612	110918120	110918213	63757	14,12	58,56	3,1	83,78	389	99	2.32768310515e-06	0.000233850191395	0.058,0.052	0.009,0.003	0.049
73429	ENSG00000260573.4	ENSG00000260573	chr16	+	50530213	50530329	50524832	50524967	50531478	50531581	73429	53,33	15,8	1,2	7,4	215	99	2.35230784251e-06	0.000235849564025	0.619,0.655	0.062,0.187	0.512
3754	ENSG00000088367.23	EPB41L1	chr20	+	36219760	36219844	36212271	36212376	36221863	36221934	3754	412,410	8,8	277,231	24,16	183	99	2.37081803234e-06	0.000237229088523	0.965,0.965	0.862,0.886	0.091
53654	ENSG00000104228.13	TRIM35	chr8	-	27290155	27290178	27289161	27289280	27294079	27294135	53654	18,36	1,1	16,3	9,4	122	99	2.48422802651e-06	0.000248079979183	0.936,0.967	0.591,0.378	0.467
37405	ENSG00000257261.7	SLC38A4-AS1	chr12	+	46470152	46470262	46387746	46387972	46484457	46485060	37405	64,36	5,8	62,38	0,0	209	99	2.52451708649e-06	0.000251600125041	0.858,0.681	1.0,1.0	-0.23
5739	ENSG00000161265.15	U2AF1L4	chr19	-	35744625	35744692	35744322	35744421	35745124	35745157	5739	8,4	2,5	5,6	0,0	166	99	2.55659154502e-06	0.00025384785365	0.705,0.323	1.0,1.0	-0.486
10910	ENSG00000113845.10	TIMMDC1	chr3	+	119503953	119504021	119498580	119498927	119517204	119517315	10910	1,0	1,2	1,1	0,0	167	99	2.55723839671e-06	0.00025384785365	0.372,0.0	1.0,1.0	-0.814
13019	ENSG00000121022.14	COPS5	chr8	-	67047767	67047859	67045811	67045960	67051229	67051341	13019	18,27	109,136	11,9	237,177	191	99	2.57413273241e-06	0.000255017899726	0.079,0.093	0.023,0.026	0.061
21461	ENSG00000143207.21	COP1	chr1	-	176136487	176136547	176135009	176135086	176149005	176149074	21461	141,122	33,22	63,71	56,37	159	99	2.63381664101e-06	0.000260414056836	0.727,0.775	0.412,0.544	0.273
17612	ENSG00000130988.13	RGN	chrX	+	47089775	47089991	47084417	47084600	47091677	47091809	17612	280,257	102,111	853,636	162,138	315	99	2.70591916962e-06	0.000267014328178	0.463,0.421	0.623,0.592	-0.165
82056	ENSG00000289867.1	ENSG00000289867	chr18	-	34925464	34925575	34924370	34924463	34928400	34928524	82056	17,14	10,11	0,0	2,4	210	99	2.71375542804e-06	0.000267259412776	0.445,0.375	0.0,0.0	0.41
66431	ENSG00000137700.19	SLC37A4	chr11	-	119026501	119026688	119025966	119026080	119026936	119027095	66431	151,117	79,48	138,88	135,103	286	99	2.76031294444e-06	0.000271309420529	0.398,0.458	0.261,0.228	0.184
50109	ENSG00000135250.17	SRPK2	chr7	-	105268805	105268869	105203627	105203785	105388647	105388702	50109	11,10	19,7	0,0	8,4	163	99	2.78704412293e-06	0.000273245518606	0.26,0.465	0.0,0.0	0.363
65632	ENSG00000117834.13	SLC5A9	chr1	+	48229102	48229165	48228849	48228954	48229294	48229459	65632	39,36	21,21	26,21	50,44	162	99	2.7909558088e-06	0.000273245518606	0.532,0.512	0.241,0.226	0.289
61623	ENSG00000076685.19	NT5C2	chr10	-	103100751	103100964	103099925	103100019	103101044	103101102	61623	82,104	144,117	49,36	166,116	312	99	2.86722916498e-06	0.000280163638819	0.153,0.22	0.086,0.09	0.099
70047	ENSG00000111445.14	RFC5	chr12	+	118017689	118018053	118016721	118016892	118019071	118019136	70047	27,39	19,27	15,19	55,36	463	99	2.87386256137e-06	0.000280263342875	0.233,0.236	0.055,0.101	0.156
69255	ENSG00000124155.19	PIGT	chr20	+	45416516	45416694	45416096	45416343	45419294	45419395	69255	675,620	6,2	399,306	12,13	277	99	2.95411878826e-06	0.000287127074016	0.976,0.991	0.922,0.894	0.076
77351	ENSG00000168434.13	COG7	chr16	-	23391961	23392234	23388775	23389086	23392379	23392523	77351	43,31	147,149	9,2	92,83	372	99	2.95574524933e-06	0.000287127074016	0.072,0.052	0.025,0.006	0.046
45724	ENSG00000136560.14	TANK	chr2	+	161197336	161197528	161179652	161179761	161202862	161202979	45724	16,11	3,4	8,5	0,0	291	99	2.96191300064e-06	0.000287167530165	0.645,0.483	1.0,1.0	-0.436
48817	ENSG00000168385.18	SEPTIN2	chr2	+	241324408	241324662	241324215	241324241	241325992	241326113	48817	89,94	1296,1334	63,31	1724,1382	353	99	2.97800029581e-06	0.000287880982037	0.019,0.019	0.01,0.006	0.011
49083	ENSG00000135535.17	CD164	chr6	-	109370410	109370467	109366513	109369017	109376073	109376112	49083	841,829	58,62	1264,842	176,125	156	99	2.98080286221e-06	0.000287880982037	0.902,0.895	0.82,0.81	0.084
52834	ENSG00000136699.20	SMPD4	chr2	-	130159512	130159634	130157250	130157396	130164373	130164445	52834	25,26	36,38	9,13	70,57	221	99	2.99531156001e-06	0.000288723748075	0.237,0.235	0.054,0.093	0.162
28747	ENSG00000077782.22	FGFR1	chr8	-	38429681	38429948	38427920	38428435	38457355	38457446	28747	89,69	3,0	137,101	19,16	366	99	3.0016941206e-06	0.000288781481957	0.889,1.0	0.661,0.631	0.298
69661	ENSG00000144283.23	PKP4	chr2	+	158676738	158676867	158673882	158674000	158678580	158678654	69661	339,360	292,286	161,123	223,220	228	99	3.01028752625e-06	0.000289051281679	0.335,0.353	0.239,0.195	0.127
35853	ENSG00000159658.15	EFCAB14	chr1	-	46688352	46688544	46684490	46686870	46689586	46689691	35853	51,37	16,19	20,16	42,21	291	99	3.07200146754e-06	0.000294127671736	0.52,0.398	0.139,0.206	0.287
68576	ENSG00000065357.20	DGKA	chr12	+	55938637	55938698	55937977	55938052	55938914	55938942	68576	1,0	1,2	1,4	0,0	160	99	3.07493630503e-06	0.000294127671736	0.382,0.0	1.0,1.0	-0.809
39248	ENSG00000138078.16	PREPL	chr2	-	44359496	44359750	44346267	44346390	44361379	44361806	39248	146,132	54,63	135,91	12,15	353	99	3.17711367803e-06	0.000303320197051	0.431,0.37	0.759,0.63	-0.294
78751	ENSG00000231312.8	MAP4K3-DT	chr2	+	39557981	39558046	39518582	39518710	39646261	39646390	78751	90,86	13,15	90,59	2,1	164	99	3.21491402644e-06	0.000306343267661	0.807,0.776	0.964,0.973	-0.177
75249	ENSG00000257878.3	ENSG00000257878	chr12	+	95998330	95998427	95996463	95996630	96000090	96000260	75249	0,0	3,6	9,5	7,5	196	99	3.2422124624e-06	0.000308356019924	0.0,0.0	0.394,0.336	-0.365
16512	ENSG00000153113.24	CAST	chr5	+	96726793	96726859	96722638	96722698	96727488	96727530	16512	0,2	116,111	15,11	135,111	165	99	3.31263714271e-06	0.000314454914777	0.0,0.011	0.063,0.056	-0.054
27947	ENSG00000204084.13	INPP5B	chr1	-	37942082	37942264	37940762	37940798	37943639	37943669	27947	22,24	8,8	6,3	8,19	281	99	3.37422695351e-06	0.000319693597753	0.492,0.514	0.209,0.053	0.372
32779	ENSG00000173660.12	UQCRH	chr1	+	46309896	46310044	46309100	46309127	46310154	46310316	32779	384,415	1554,1504	419,338	2665,2266	247	99	3.40421914535e-06	0.000321924367702	0.09,0.1	0.059,0.056	0.038
65580	ENSG00000246523.10	FZD4-DT	chr11	+	86999875	86999947	86957981	86958026	87021317	87021909	65580	4,5	2,4	3,1	0,0	171	99	3.41172218443e-06	0.0003220240083	0.537,0.42	1.0,1.0	-0.521
75007	ENSG00000125648.15	SLC25A23	chr19	-	6452311	6452479	6444150	6444301	6454322	6454405	75007	156,142	0,0	84,93	7,4	267	99	3.41839693385e-06	0.000322045240196	1.0,1.0	0.816,0.896	0.144
24930	ENSG00000003756.17	RBM5	chr3	+	50100531	50100605	50099981	50100051	50103082	50103107	24930	69,72	20,22	103,77	5,7	173	99	3.449281751e-06	0.000324342913577	0.664,0.652	0.922,0.863	-0.235
2682	ENSG00000205581.11	HMGN1	chr21	-	39345829	39347292	39345145	39345274	39347378	39347483	2682	895,895	4,4	284,202	8,8	1562	99	3.49526015786e-06	0.000326819915622	0.934,0.934	0.692,0.615	0.281
8822	ENSG00000185495.10	SEPTIN7P13	chr1	+	224002521	224002622	223992742	223993047	224003519	224003654	8822	6,3	0,0	1,2	2,2	200	99	3.49419768042e-06	0.000326819915622	1.0,1.0	0.198,0.331	0.736
28746	ENSG00000077782.22	FGFR1	chr8	-	38429246	38429390	38428345	38428435	38457355	38457446	28746	13,3	3,0	5,1	19,16	243	99	3.48329463418e-06	0.000326819915622	0.638,1.0	0.097,0.025	0.758
81010	ENSG00000256525.8	POLG2	chr17	-	64483389	64483506	64482918	64482999	64485727	64485868	81010	21,23	38,39	7,2	51,30	216	99	3.5083178771e-06	0.000327427700788	0.202,0.213	0.059,0.03	0.163
36208	ENSG00000155093.19	PTPRN2	chr7	-	157682724	157682937	157656356	157656551	157898672	157898737	36208	822,750	12,15	577,441	0,0	312	99	3.58013658397e-06	0.000332886033099	0.956,0.941	1.0,1.0	-0.052
69251	ENSG00000124155.19	PIGT	chr20	+	45416516	45416654	45416106	45416343	45419294	45419395	69251	508,488	6,2	300,250	12,13	237	99	3.57444789312e-06	0.000332886033099	0.973,0.99	0.913,0.889	0.081
35909	ENSG00000170266.16	GLB1	chr3	-	33030698	33030811	33030141	33030196	33046119	33046232	35909	2,1	1,3	1,3	0,0	212	99	3.71346656369e-06	0.00034464144794	0.483,0.135	1.0,1.0	-0.691
81365	ENSG00000239779.7	WBP1	chr2	+	74458831	74458919	74458438	74458671	74459642	74459745	81365	45,12	92,53	15,5	120,85	187	99	3.74188727104e-06	0.000346634829926	0.206,0.107	0.062,0.03	0.111
79307	ENSG00000167842.16	MIS12	chr17	+	5488195	5488589	5486565	5486684	5488822	5488935	79307	316,369	7,9	154,144	19,12	493	99	3.77062436085e-06	0.000348650083262	0.901,0.892	0.619,0.707	0.234
58192	ENSG00000136856.18	SLC2A8	chr9	+	127397904	127398111	127397375	127397538	127399906	127400006	58192	40,39	0,0	21,16	2,5	306	99	3.78833055314e-06	0.000349639801939	1.0,1.0	0.773,0.509	0.359
54243	ENSG00000156170.14	NDUFAF6	chr8	+	94950770	94950809	94949765	94950359	94957994	94958179	54243	2,3	5,1	4,1	0,0	138	99	3.89805340251e-06	0.000359102775721	0.223,0.683	1.0,1.0	-0.547
25965	ENSG00000142599.19	RERE	chr1	-	8423166	8423247	8422726	8422807	8423560	8423666	25965	4,6	1,5	2,3	0,0	180	99	3.94401149384e-06	0.00036266747311	0.688,0.398	1.0,1.0	-0.457
3608	ENSG00000196756.15	SNHG17	chr20	-	38422086	38422241	38420591	38421098	38426418	38426503	3608	80,62	3,4	61,43	17,13	254	99	4.01345773671e-06	0.000368374923257	0.912,0.858	0.583,0.563	0.312
40674	ENSG00000259153.4	MAP3K9-DT	chr14	+	70810746	70811062	70810009	70810291	70815110	70815391	40674	23,17	12,5	2,2	9,9	415	99	4.05505232071e-06	0.000371509756744	0.314,0.448	0.05,0.05	0.331
41519	ENSG00000138434.17	ITPRID2	chr2	+	181918322	181918470	181915215	181916427	181918597	181918675	41519	31,29	123,108	6,9	129,87	247	99	4.07568386651e-06	0.000372716064357	0.092,0.097	0.018,0.04	0.066
66913	ENSG00000229425.5	ENSG00000229425	chr21	-	15441777	15441847	15441225	15441348	15444023	15444081	66913	7,7	2,5	0,0	1,2	169	99	4.09567778537e-06	0.000373859757772	0.672,0.451	0.0,0.0	0.561
49700	ENSG00000153560.12	UBP1	chr3	-	33408689	33408797	33402800	33402904	33409235	33409346	49700	197,196	117,120	91,78	125,92	207	99	4.14078398248e-06	0.00037728738144	0.446,0.439	0.258,0.289	0.169
34026	ENSG00000075151.24	EIF4G3	chr1	-	21001198	21001312	20997600	20997633	21002712	21002808	34026	5,12	5,2	6,2	0,0	213	99	4.20664424639e-06	0.000382590079903	0.317,0.736	1.0,1.0	-0.474
81966	ENSG00000188219.16	POTEE	chr2	+	131252525	131252570	131250777	131250848	131252917	131253099	81966	6,7	2,5	6,2	0,0	144	99	4.25106162794e-06	0.00038592683299	0.673,0.49	1.0,1.0	-0.418
754	ENSG00000102053.13	ZC3H12B	chrX	+	65075473	65075670	65051461	65052103	65075843	65075912	754	0,0	1,1	3,2	1,0	296	99	4.37218000426e-06	0.000396202032292	0.0,0.0	0.501,1.0	-0.75
13179	ENSG00000176731.12	RBIS	chr8	-	85219322	85219363	85217385	85217502	85220305	85220339	13179	73,42	220,262	57,41	531,464	140	99	4.39265521923e-06	0.000397336354622	0.19,0.102	0.071,0.059	0.081
26092	ENSG00000132677.13	RHBG	chr1	+	156378251	156378399	156374606	156374729	156382747	156382869	26092	182,142	0,1	105,68	6,6	247	99	4.40987969286e-06	0.000398143481636	1.0,0.983	0.875,0.82	0.144
65600	ENSG00000109861.17	CTSC	chr11	-	88328111	88328196	88312387	88312554	88334936	88335082	65600	31,32	107,122	23,12	236,149	184	99	4.41752596236e-06	0.000398143481636	0.135,0.124	0.05,0.042	0.084
15104	ENSG00000133835.18	HSD17B4	chr5	+	119471635	119471700	119456314	119456368	119473907	119474015	15104	23,28	371,376	4,6	336,276	164	99	4.43574546682e-06	0.000399065237664	0.036,0.043	0.007,0.013	0.029
13716	ENSG00000172869.15	DMXL1	chr5	+	119206833	119206896	119203318	119203436	119216900	119216987	13716	7,18	27,29	1,0	18,16	162	99	4.46756414807e-06	0.000401204937909	0.137,0.275	0.033,0.0	0.19
15048	ENSG00000117335.21	CD46	chr1	+	207767606	207767651	207767012	207767195	207767778	207767823	15048	50,44	675,659	29,20	1040,707	144	99	4.53600297212e-06	0.000406619684741	0.048,0.044	0.019,0.019	0.027
55849	ENSG00000033867.17	SLC4A7	chr3	-	27379248	27379356	27372722	27376845	27383152	27383250	55849	397,405	1,4	177,126	10,6	207	99	4.59284670018e-06	0.000410977470585	0.995,0.98	0.894,0.909	0.086
62470	ENSG00000132330.18	SCLY	chr2	+	238068068	238068165	238064356	238064469	238081708	238081741	62470	3,2	3,2	2,1	0,0	196	99	4.74611057033e-06	0.000423533292388	0.336,0.336	1.0,1.0	-0.664
69501	ENSG00000111785.21	RIC8B	chr12	+	106874480	106874567	106870822	106870942	106878986	106879125	69501	5,4	2,3	0,0	1,2	186	99	4.75012805146e-06	0.000423533292388	0.571,0.415	0.0,0.0	0.493
43004	ENSG00000213213.14	CCDC183	chr9	+	136799712	136799790	136799101	136799223	136800001	136800169	43004	49,48	0,1	26,18	3,8	177	99	4.81722073409e-06	0.000428749819026	1.0,0.964	0.829,0.557	0.289
65637	ENSG00000077616.11	NAALAD2	chr11	+	90159238	90159337	90158144	90158238	90162948	90163034	65637	48,38	0,4	35,21	12,13	198	99	4.8431452303e-06	0.000430290185933	1.0,0.826	0.593,0.447	0.393
35611	ENSG00000179630.11	LACC1	chr13	+	43890113	43890274	43888756	43888982	43891448	43893931	35611	13,12	0,0	6,5	4,1	260	99	4.8731990373e-06	0.000432191298635	1.0,1.0	0.364,0.656	0.49
36156	ENSG00000078618.23	NRDC	chr1	-	51836368	51836438	51836130	51836212	51840225	51840454	36156	17,27	203,211	8,3	239,193	169	99	4.88465720194e-06	0.000432439394947	0.047,0.07	0.019,0.009	0.045
14516	ENSG00000273841.6	TAF9	chr5	-	69368824	69368987	69366502	69366595	69369462	69369490	14516	42,59	429,394	34,23	607,523	262	99	5.03307080102e-06	0.000444789837461	0.036,0.054	0.021,0.016	0.026
78030	ENSG00000162769.13	FLVCR1	chr1	+	212887890	212888001	212885292	212885396	212888488	212888594	78030	88,85	5,5	114,66	33,14	210	99	5.06602141326e-06	0.000446910804215	0.892,0.889	0.62,0.69	0.236
53876	ENSG00000087460.29	GNAS	chr20	+	58898940	58898985	58893094	58895684	58899948	58900030	53876	443,480	18,20	450,301	4,2	144	99	5.10421517552e-06	0.000449486010457	0.944,0.943	0.987,0.99	-0.045
22816	ENSG00000171105.14	INSR	chr19	-	7150496	7150532	7142815	7143090	7152725	7152927	22816	8,11	70,64	28,20	53,33	135	99	5.18150408968e-06	0.000455488874475	0.077,0.112	0.279,0.308	-0.199
64359	ENSG00000089597.18	GANAB	chr11	-	62634309	62634375	62633441	62633514	62634820	62635000	64359	141,137	505,469	74,63	542,409	165	99	5.19939155474e-06	0.000456258031142	0.143,0.149	0.076,0.085	0.065
51861	ENSG00000113924.12	HGD	chr3	-	120644597	120644619	120644318	120644443	120646266	120646366	51861	61,43	300,299	35,25	499,340	121	99	5.39715635917e-06	0.000472781428368	0.143,0.105	0.054,0.057	0.069
47819	ENSG00000204152.14	TIMM23B	chr10	+	49945031	49945090	49942052	49942300	49952125	49952219	47819	52,66	1,0	34,18	7,3	158	99	5.52866813286e-06	0.000483453465047	0.97,1.0	0.753,0.79	0.213
62369	ENSG00000148814.18	LRRC27	chr10	+	132366298	132366677	132365423	132365550	132375065	132375457	62369	11,6	13,6	0,0	10,7	478	99	5.55631974897e-06	0.000485022030395	0.149,0.172	0.0,0.0	0.16
13748	ENSG00000167283.9	ATP5MG	chr11	+	118401883	118401964	118401583	118401717	118403923	118403985	13748	2,2	0,1	0,0	1,1	180	99	5.59551306989e-06	0.000487590860546	1.0,0.524	0.0,0.0	0.762
53069	ENSG00000177565.18	TBL1XR1	chr3	-	177079826	177079945	177064919	177065022	177098465	177098541	53069	12,10	19,36	1,0	30,9	218	99	5.6792198353e-06	0.000493751804649	0.223,0.112	0.015,0.0	0.16
58354	ENSG00000286112.1	ENSG00000286112	chr9	-	128847432	128847643	128846679	128846856	128881896	128881931	58354	16,14	1,0	10,6	5,4	310	99	5.68599242301e-06	0.000493751804649	0.836,1.0	0.39,0.324	0.561
5875	ENSG00000168813.17	ZNF507	chr19	+	32347244	32347338	32345609	32345783	32352828	32354957	5875	23,25	7,8	27,15	1,0	193	99	5.80828710062e-06	0.000502690256869	0.628,0.616	0.933,1.0	-0.345
20068	ENSG00000074964.17	ARHGEF10L	chr1	+	17634547	17634562	17632320	17632466	17634834	17635016	20068	84,62	148,103	110,99	80,81	114	99	5.81912976849e-06	0.000502690256869	0.33,0.343	0.544,0.515	-0.193
73495	ENSG00000119638.14	NEK9	chr14	-	75086780	75086921	75082171	75084686	75087017	75087230	73495	13,16	92,72	2,1	84,51	240	99	5.81138923095e-06	0.000502690256869	0.055,0.084	0.01,0.008	0.061
41903	ENSG00000104957.14	YJU2B	chr19	+	13761490	13761568	13759075	13759272	13762298	13762437	41903	22,13	24,27	4,0	24,22	177	99	5.86553033943e-06	0.000505823480791	0.339,0.212	0.085,0.0	0.233
29226	ENSG00000111196.10	MAGOHB	chr12	-	10612639	10612978	10610621	10610680	10613438	10613600	29226	61,59	33,36	34,23	55,42	438	99	5.94313928803e-06	0.000511632565156	0.295,0.27	0.123,0.11	0.166
12022	ENSG00000124570.21	SERPINB6	chr6	-	2960969	2961096	2959167	2959342	2961893	2962139	12022	4,6	1,4	3,1	0,0	226	99	5.98185664424e-06	0.000514079318595	0.637,0.397	1.0,1.0	-0.483
75168	ENSG00000166262.16	FAM227B	chr15	-	49577628	49577664	49577171	49577305	49588015	49588083	75168	3,4	3,3	2,3	0,0	135	99	6.09753767522e-06	0.000523120538937	0.423,0.494	1.0,1.0	-0.541
73372	ENSG00000148660.22	CAMK2G	chr10	-	73828088	73828121	73821681	73821730	73837467	73837511	73372	1,1	0,0	0,1	1,2	132	99	6.11982507182e-06	0.000524132050877	1.0,1.0	0.0,0.273	0.863
70639	ENSG00000162669.16	HFM1	chr1	-	91266016	91266107	91262480	91262592	91267744	91267855	70639	5,7	3,3	2,3	0,0	190	99	6.15878238763e-06	0.000526565348282	0.465,0.549	1.0,1.0	-0.493
17503	ENSG00000109270.13	LAMTOR3	chr4	-	99893954	99894000	99891999	99892034	99894334	99894376	17503	246,297	18,15	223,159	34,33	145	99	6.22779613724e-06	0.00053155570757	0.903,0.931	0.817,0.767	0.125
25797	ENSG00000164548.12	TRA2A	chr7	-	23522120	23522432	23521706	23521840	23531788	23531980	25797	276,298	33,32	128,111	45,28	411	99	6.31411603769e-06	0.000538003631191	0.668,0.692	0.407,0.488	0.232
22310	ENSG00000148842.18	CNNM2	chr10	+	103071773	103071839	103068628	103068722	103076085	103076270	22310	37,42	44,46	17,8	56,41	165	99	6.34826980683e-06	0.000539992265289	0.335,0.354	0.154,0.105	0.215
18491	ENSG00000177239.16	MAN1B1	chr9	+	137105607	137105916	137101483	137101672	137106124	137106315	18491	71,50	136,116	32,22	141,142	408	99	6.44723787591e-06	0.000546548550175	0.112,0.095	0.052,0.036	0.06
38653	ENSG00000069424.16	KCNAB2	chr1	+	6018634	6018835	5992665	5992788	6040516	6040645	38653	2,1	6,18	13,3	6,2	300	99	6.44723911103e-06	0.000546548550175	0.099,0.018	0.417,0.331	-0.316
46643	ENSG00000154556.20	SORBS2	chr4	-	185606584	185607349	185589678	185589785	185611779	185611980	46643	49,29	2,4	44,32	0,0	864	99	6.4679177223e-06	0.000547372203038	0.737,0.454	1.0,1.0	-0.404
77657	ENSG00000185947.15	ZNF267	chr16	+	31890206	31890250	31885160	31885256	31914475	31914558	77657	0,1	26,24	9,4	12,18	143	99	6.62064372836e-06	0.000559349174282	0.0,0.028	0.342,0.133	-0.224
59571	ENSG00000107890.17	ANKRD26	chr10	-	27061143	27061242	27060511	27060540	27063987	27064081	59571	10,14	4,3	15,15	0,0	198	99	6.66981803943e-06	0.000562551831971	0.556,0.7	1.0,1.0	-0.372
16857	ENSG00000245958.8	SEPTIN7P14	chr4	+	119543752	119543845	119528739	119528789	119550378	119550443	16857	9,8	0,0	20,11	4,5	192	99	6.7227979148e-06	0.000564161382662	1.0,1.0	0.721,0.531	0.374
27057	ENSG00000125354.24	SEPTIN6	chrX	-	119625334	119625379	119616944	119620051	119629317	119629508	27057	64,67	0,0	39,34	6,4	144	99	6.70711337258e-06	0.000564161382662	1.0,1.0	0.817,0.854	0.165
37155	ENSG00000132881.12	CPLANE2	chr1	-	16232892	16233017	16232509	16232646	16233611	16233764	37155	1,3	2,2	2,6	0,0	224	99	6.71360512394e-06	0.000564161382662	0.181,0.399	1.0,1.0	-0.71
43850	ENSG00000259347.9	ENSG00000259347	chr15	-	66986367	66986497	66984102	66984234	66987157	66987262	43850	284,238	5,6	244,197	18,21	229	99	6.75723014842e-06	0.000566099427082	0.961,0.945	0.854,0.802	0.125
67028	ENSG00000151062.15	CACNA2D4	chr12	-	1810542	1810587	1810277	1810340	1811661	1811720	67028	494,429	90,88	205,231	122,82	144	99	6.78437066515e-06	0.000567421125095	0.791,0.77	0.536,0.659	0.183
77520	ENSG00000169592.15	INO80E	chr16	+	30001211	30001530	30000928	30001040	30005220	30005323	77520	128,116	10,5	74,65	25,14	418	99	6.81909934963e-06	0.000569371989342	0.752,0.846	0.412,0.524	0.331
62702	ENSG00000005801.18	ZNF195	chr11	-	3361742	3361889	3358993	3360565	3370974	3371070	62702	43,45	27,37	12,17	35,38	246	99	6.91590997282e-06	0.000576322059219	0.391,0.329	0.121,0.153	0.223
82601	ENSG00000160953.17	PWWP3A	chr19	+	1364508	1364579	1361895	1362351	1366304	1366351	82601	142,133	0,3	68,51	5,9	170	99	6.9254217927e-06	0.000576322059219	1.0,0.963	0.888,0.767	0.154
7403	ENSG00000091136.15	LAMB1	chr7	-	108002126	108002384	108001557	108001733	108002848	108002971	7403	22,9	79,90	0,1	60,50	357	99	6.94371245225e-06	0.000576882706245	0.072,0.027	0.0,0.006	0.046
3615	ENSG00000196756.15	SNHG17	chr20	-	38422095	38422241	38421005	38421098	38426418	38426503	3615	74,51	3,4	55,39	17,13	245	99	7.00161802014e-06	0.000577847585725	0.909,0.837	0.567,0.548	0.316
22117	ENSG00000145014.18	TMEM44	chr3	-	194617635	194617776	194617098	194617269	194623223	194623310	22117	10,5	3,4	0,1	6,5	240	99	6.97042825637e-06	0.000577847585725	0.579,0.34	0.0,0.076	0.422
23773	ENSG00000152234.16	ATP5F1A	chr18	-	46093179	46093362	46091681	46091851	46094979	46095131	23773	14,16	2,5	3,3	0,0	282	99	6.97910652647e-06	0.000577847585725	0.711,0.529	1.0,1.0	-0.38
56577	ENSG00000165304.8	MELK	chr9	+	36594627	36594771	36589535	36589652	36597221	36597290	56577	38,45	7,8	57,64	1,1	243	99	6.9985708071e-06	0.000577847585725	0.689,0.696	0.959,0.963	-0.269
6614	ENSG00000181392.17	SYNE4	chr19	-	36007124	36007268	36005332	36005437	36008216	36008367	6614	65,38	0,0	43,52	8,3	243	99	7.07977555003e-06	0.000583333783809	1.0,1.0	0.687,0.876	0.218
4631	ENSG00000063241.8	ISOC2	chr19	-	55455635	55455845	55455259	55455330	55456348	55456489	4631	257,252	12,22	287,245	58,41	309	99	7.12040318129e-06	0.000585714746697	0.873,0.786	0.613,0.657	0.195
83329	ENSG00000104067.17	TJP1	chr15	-	29719776	29720016	29718265	29719138	29720357	29720708	83329	49,49	55,61	68,43	22,20	339	99	7.25390427425e-06	0.000595714957759	0.206,0.19	0.474,0.386	-0.232
60243	ENSG00000148584.15	A1CF	chr10	-	50864032	50864080	50859841	50859985	50885580	50885627	60243	52,39	203,147	30,15	219,230	147	99	7.27504054587e-06	0.000596469703606	0.147,0.152	0.084,0.042	0.086
53870	ENSG00000164751.15	PEX2	chr8	-	76988306	76988338	76986186	76986296	76999989	77000078	53870	210,153	40,39	238,174	19,13	131	99	7.44346125869e-06	0.000609277810013	0.799,0.748	0.904,0.91	-0.133
35855	ENSG00000112739.17	PRPF4B	chr6	+	4056526	4056688	4056320	4056435	4057035	4057187	35855	41,35	166,157	13,5	149,98	261	99	7.65165590666e-06	0.000625294322546	0.086,0.078	0.032,0.019	0.056
23676	ENSG00000169660.17	HEXD	chr17	+	82440472	82440613	82439630	82439713	82440996	82441075	23676	98,77	24,14	50,27	30,32	240	99	7.73272494747e-06	0.000630886747307	0.627,0.694	0.407,0.258	0.328
26971	ENSG00000131374.15	TBC1D5	chr3	-	17586352	17586557	17508548	17508605	17622647	17622765	26971	11,9	3,3	15,6	0,0	304	99	8.02379993292e-06	0.000653566646738	0.544,0.494	1.0,1.0	-0.481
42217	ENSG00000080822.17	CLDND1	chr3	-	98521652	98521696	98521132	98521442	98522848	98522955	42217	9,16	124,144	0,5	232,120	143	99	8.0775768394e-06	0.00065580729946	0.048,0.071	0.0,0.028	0.045
76065	ENSG00000111237.19	VPS29	chr12	-	110496822	110497002	110496045	110496203	110499534	110499546	76065	43,52	81,104	11,14	78,70	279	99	8.07670918701e-06	0.00065580729946	0.159,0.151	0.048,0.066	0.098
28895	ENSG00000119801.13	YPEL5	chr2	+	30148244	30148305	30147006	30147062	30155849	30155910	28895	18,23	8,17	38,22	1,3	160	99	8.17493395255e-06	0.00066263413504	0.582,0.456	0.959,0.819	-0.37
2537	ENSG00000186866.17	POFUT2	chr21	-	45266021	45266227	45263927	45265635	45267589	45267713	2537	34,43	93,111	11,11	107,78	305	99	8.22198076966e-06	0.000662655792365	0.106,0.112	0.032,0.044	0.071
68298	ENSG00000050426.16	LETMD1	chr12	+	51056149	51056245	51052091	51052207	51056349	51056502	68298	96,110	10,13	140,99	42,55	195	99	8.21896435244e-06	0.000662655792365	0.83,0.811	0.629,0.477	0.268
81448	ENSG00000183077.16	AFMID	chr17	+	78205602	78205738	78205439	78205518	78205945	78206050	81448	479,502	1,3	250,237	13,4	235	99	8.21807786278e-06	0.000662655792365	0.995,0.986	0.89,0.961	0.065
81450	ENSG00000183077.16	AFMID	chr17	+	78205602	78205753	78205439	78205518	78205945	78206050	81450	338,353	1,3	196,162	13,4	250	99	8.2282868612e-06	0.000662655792365	0.993,0.979	0.857,0.941	0.087
77368	ENSG00000103353.16	UBFD1	chr16	+	23559778	23559868	23559027	23559676	23562205	23562271	77368	34,27	181,190	12,13	271,198	189	99	8.48558568001e-06	0.000682276616085	0.09,0.069	0.023,0.033	0.052
69155	ENSG00000186908.15	ZDHHC17	chr12	+	76821057	76821167	76815856	76816019	76822405	76822531	69155	36,35	48,50	10,9	50,44	209	99	8.5411761751e-06	0.000685642230866	0.262,0.249	0.087,0.088	0.168
55688	ENSG00000003436.16	TFPI	chr2	-	187529363	187529485	187520541	187520613	187554199	187554349	55688	228,215	19,16	338,257	6,5	221	99	8.55926041854e-06	0.000685991062533	0.843,0.858	0.962,0.958	-0.109
34675	ENSG00000072803.18	FBXW11	chr5	-	171957596	171957698	171910571	171910797	172006457	172006638	34675	7,12	16,26	1,0	14,18	201	99	8.69195889697e-06	0.000695509935392	0.177,0.185	0.034,0.0	0.164
1052	ENSG00000147044.23	CASK	chrX	-	41557031	41557100	41555599	41555635	41559778	41559847	1052	24,25	32,23	19,9	68,51	168	99	8.77615423212e-06	0.000701123451142	0.307,0.39	0.141,0.094	0.231
24434	ENSG00000134905.17	CARS2	chr13	-	110648317	110649297	110645966	110647239	110651033	110651100	24434	22,33	55,36	18,7	89,55	1079	99	8.90292210309e-06	0.000710114702124	0.035,0.078	0.018,0.012	0.042
16799	ENSG00000138688.17	KIAA1109	chr4	+	122275971	122276022	122274342	122274436	122279774	122279981	16799	11,15	37,36	2,1	44,22	150	99	8.96215590507e-06	0.000712562749198	0.164,0.216	0.029,0.029	0.161
68294	ENSG00000050426.16	LETMD1	chr12	+	51056143	51056245	51052091	51052207	51056349	51056428	68294	97,115	10,13	145,102	42,55	201	99	8.96105015291e-06	0.000712562749198	0.827,0.813	0.63,0.477	0.266
72995	ENSG00000257621.9	PSMA3-AS1	chr14	-	58293065	58293138	58291634	58291707	58297954	58298084	72995	9,12	38,39	3,0	52,39	172	99	9.14526515283e-06	0.000725965396416	0.12,0.15	0.032,0.0	0.119
19063	ENSG00000175087.10	PDIK1L	chr1	+	26112459	26112650	26111836	26111915	26114291	26114593	19063	3,7	2,1	1,0	5,9	290	99	9.15997554041e-06	0.00072597895033	0.339,0.705	0.064,0.0	0.49
46375	ENSG00000153406.14	NMRAL1	chr16	-	4471356	4471449	4469226	4469465	4474092	4474166	46375	12,9	39,58	2,2	81,56	192	99	9.36682923192e-06	0.000741196751789	0.137,0.074	0.013,0.018	0.09
62471	ENSG00000132330.18	SCLY	chr2	+	238073782	238073847	238064356	238064469	238081708	238081836	62471	3,2	3,2	3,1	0,0	164	99	9.60533661443e-06	0.000758867187492	0.376,0.376	1.0,1.0	-0.624
9652	ENSG00000145506.14	NKD2	chr5	+	1037519	1037698	1036256	1036384	1037804	1038682	9652	7,3	1,0	0,2	2,2	278	99	9.64219589916e-06	0.000760575803224	0.714,1.0	0.0,0.263	0.726
20866	ENSG00000147526.20	TACC1	chr8	+	38742350	38742451	38728587	38728671	38788703	38788819	20866	3,5	1,2	0,0	1,1	200	99	9.95772693824e-06	0.000784225968065	0.598,0.553	0.0,0.0	0.576
6393	ENSG00000078674.19	PCM1	chr8	+	17934705	17934858	17924712	17924780	17935588	17935706	6393	15,20	65,93	6,0	79,64	252	99	1.006301461e-05	0.000791269893688	0.083,0.078	0.029,0.0	0.066
51687	ENSG00000282508.2	LINC01002	chr19	-	208957	209014	208326	208391	209235	209370	51687	20,17	3,1	1,0	1,3	156	99	1.01516699479e-05	0.000796985899636	0.809,0.915	0.388,0.0	0.668
72043	ENSG00000095637.23	SORBS1	chr10	-	95415468	95416185	95414493	95414862	95421960	95422073	72043	8,13	7,3	5,0	23,9	816	99	1.05116041847e-05	0.000823948051093	0.122,0.345	0.026,0.0	0.22
81919	ENSG00000128789.22	PSMG2	chr18	+	12713787	12714029	12712701	12712760	12718516	12718635	81919	18,14	141,147	3,2	263,157	341	99	1.05474279746e-05	0.000825460229153	0.036,0.027	0.003,0.004	0.028
11607	ENSG00000126091.21	ST3GAL3	chr1	+	43879026	43879231	43838218	43838311	43879334	43879507	11607	11,1	1,0	2,0	1,2	304	99	1.06330994117e-05	0.00083086273353	0.782,1.0	0.394,0.0	0.694
801	ENSG00000235437.10	LINC01278	chrX	-	63509943	63510079	63432363	63432491	63560831	63560948	801	2,3	12,15	5,8	2,1	235	99	1.06917300202e-05	0.000833702660976	0.066,0.078	0.513,0.771	-0.57
79027	ENSG00000197912.16	SPG7	chr16	+	89548426	89549713	89548002	89548113	89550493	89550609	79027	257,267	216,169	97,87	135,128	1386	99	1.07028380302e-05	0.000833702660976	0.078,0.101	0.049,0.046	0.042
3506	ENSG00000101049.18	SGK2	chr20	+	43565041	43565286	43558967	43559159	43566472	43566531	3506	24,15	13,17	13,7	44,37	344	99	1.10420057489e-05	0.000858782537458	0.347,0.203	0.078,0.052	0.21
3611	ENSG00000196756.15	SNHG17	chr20	-	38422091	38422241	38420587	38421098	38426418	38426503	3611	79,55	3,4	60,46	17,13	249	99	1.11648774729e-05	0.000866988331414	0.913,0.845	0.584,0.585	0.294
1223	ENSG00000047634.15	SCML1	chrX	+	17744070	17744219	17737468	17737680	17746014	17746098	1223	142,108	95,72	46,33	64,61	248	99	1.12245115281e-05	0.000870265660108	0.374,0.375	0.223,0.178	0.174
23451	ENSG00000183844.17	FAM3B	chr21	+	41346208	41346407	41345685	41345736	41347012	41347100	23451	35,27	119,113	19,17	250,143	298	99	1.13245250887e-05	0.000876658701091	0.089,0.074	0.025,0.038	0.05
82499	ENSG00000166377.21	ATP9B	chr18	+	79375393	79375426	79373897	79374101	79377246	79378142	82499	9,8	17,16	1,0	15,10	132	99	1.14729795915e-05	0.000886776074277	0.284,0.273	0.048,0.0	0.254
62595	ENSG00000131368.9	MRPS25	chr3	-	15047468	15047663	15042428	15043022	15049707	15052633	62595	36,42	2,5	26,21	15,12	294	99	1.16527162622e-05	0.000899276314819	0.858,0.739	0.369,0.371	0.428
30220	ENSG00000113649.13	TCERG1	chr5	+	146468340	146468403	146463550	146463793	146469543	146469744	30220	27,31	51,89	11,4	75,57	162	99	1.18159205124e-05	0.000910464085038	0.244,0.176	0.082,0.041	0.148
68283	ENSG00000050426.16	LETMD1	chr12	+	51053777	51053860	51052087	51052207	51056349	51056428	68283	44,47	10,13	58,35	42,55	182	99	1.19117961983e-05	0.000916437436021	0.705,0.663	0.429,0.257	0.341
25799	ENSG00000164548.12	TRA2A	chr7	-	23522131	23522432	23521706	23521840	23531788	23532041	25799	265,278	33,32	127,108	45,28	400	99	1.19818544403e-05	0.000920409190859	0.665,0.683	0.411,0.488	0.225
26099	ENSG00000132677.13	RHBG	chr1	+	156381346	156381513	156374606	156374729	156382747	156382869	26099	249,234	0,1	153,111	6,6	266	99	1.23383461564e-05	0.000946337883157	1.0,0.989	0.905,0.873	0.105
35	ENSG00000012817.16	KDM5D	chrY	-	19723340	19723433	19721129	19721311	19731771	19731930	35	19,4	74,88	0,0	52,45	192	99	1.23807139379e-05	0.000948131023977	0.117,0.023	0.0,0.0	0.07
74155	ENSG00000240602.9	AADACP1	chr3	+	151776803	151776975	151775694	151775764	151783831	151784048	74155	9,2	1,2	0,0	1,2	271	99	1.26125625225e-05	0.000964407135239	0.767,0.268	0.0,0.0	0.518
25900	ENSG00000116918.15	TSNAX	chr1	+	231563464	231563629	231561127	231561255	231564527	231566524	25900	31,20	63,78	14,7	123,77	264	99	1.26502250616e-05	0.000965807932035	0.156,0.088	0.041,0.033	0.085
6241	ENSG00000182095.15	TNRC18	chr7	-	5329936	5329969	5325095	5325248	5332621	5332878	6241	12,11	27,16	1,1	22,14	132	99	1.30413816594e-05	0.000993495311447	0.25,0.34	0.033,0.051	0.253
58753	ENSG00000197165.11	SULT1A2	chr16	-	28595549	28595675	28592262	28592481	28596996	28597050	58753	42,35	2,6	47,31	26,22	225	99	1.30526711724e-05	0.000993495311447	0.902,0.72	0.443,0.383	0.398
38583	ENSG00000118495.21	PLAGL1	chr6	-	143966157	143966285	143964786	143964818	143968906	143968978	38583	2,6	0,0	5,6	4,1	227	99	1.34669519998e-05	0.00102346785434	1.0,1.0	0.353,0.724	0.462
55735	ENSG00000147852.17	VLDLR	chr9	+	2651414	2651498	2650369	2650516	2651873	2651954	55735	2,2	10,8	9,12	4,4	183	99	1.35556470521e-05	0.00102864287684	0.098,0.119	0.549,0.619	-0.476
27288	ENSG00000105879.13	CBLL1	chr7	+	107752544	107752617	107748879	107749047	107753410	107753511	27288	31,15	63,71	7,1	62,51	172	99	1.36317943876e-05	0.00103285148038	0.221,0.108	0.061,0.011	0.129
13806	ENSG00000164211.13	STARD4	chr5	-	111501961	111502088	111500146	111501116	111506329	111506379	13806	635,568	19,18	416,328	52,18	226	99	1.37002045945e-05	0.00103646199335	0.936,0.933	0.778,0.889	0.101
59809	ENSG00000148498.17	PARD3	chr10	-	34336198	34336243	34331116	34331344	34337274	34337426	59809	160,133	0,0	175,120	10,6	144	99	1.37312899501e-05	0.00103724211573	1.0,1.0	0.923,0.932	0.073
58864	ENSG00000067064.13	IDI1	chr10	-	1043998	1044171	1043300	1043393	1048863	1048886	58864	1458,1433	150,127	2408,1786	122,99	272	99	1.39368983787e-05	0.00105118319176	0.78,0.804	0.878,0.868	-0.081
3297	ENSG00000000419.14	DPM1	chr20	-	50941128	50941209	50940864	50940933	50942030	50942126	3297	80,71	364,424	61,30	573,413	180	99	1.39740764924e-05	0.00105239760685	0.108,0.084	0.055,0.038	0.05
23730	ENSG00000142949.17	PTPRF	chr1	+	43603610	43604189	43603415	43603533	43604902	43605000	23730	2320,2290	15,12	2754,2087	1,2	678	99	1.41368145884e-05	0.00106305013436	0.958,0.965	0.998,0.993	-0.034
5461	ENSG00000105223.21	PLD3	chr19	+	40365661	40365930	40348699	40348768	40366418	40366510	5461	201,191	85,82	139,96	110,94	368	99	1.43286386918e-05	0.00107423912691	0.389,0.385	0.254,0.216	0.152
24931	ENSG00000003756.17	RBM5	chr3	+	50104247	50104308	50100531	50103166	50105076	50105142	24931	123,128	45,51	140,111	20,16	160	99	1.43178737271e-05	0.00107423912691	0.628,0.608	0.812,0.811	-0.194
37779	ENSG00000116044.17	NFE2L2	chr2	-	177231888	177232008	177221387	177222632	177232391	177232583	37779	365,362	19,20	414,287	5,4	219	99	1.43606340214e-05	0.00107502371413	0.897,0.891	0.974,0.97	-0.078
79214	ENSG00000170802.17	FOXN2	chr2	+	48359046	48359147	48314636	48314814	48373291	48373328	79214	7,6	3,3	4,2	0,0	200	99	1.46145087776e-05	0.00109239077511	0.536,0.497	1.0,1.0	-0.484
52255	ENSG00000133460.20	SLC2A11	chr22	+	23877384	23877869	23877041	23877171	23882458	23882646	52255	26,11	16,18	7,4	35,23	584	99	1.46606059241e-05	0.00109419837727	0.216,0.094	0.033,0.029	0.124
2226	ENSG00000099998.19	GGT5	chr22	-	24220491	24220584	24219659	24220116	24224995	24225106	2226	5,5	2,5	0,0	1,1	192	99	1.48410845366e-05	0.0011027235	0.563,0.34	0.0,0.0	0.452
24310	ENSG00000092978.11	GPATCH2	chr1	-	217495014	217495075	217491505	217491750	217498355	217498395	24310	2,6	4,2	0,0	5,3	160	99	1.48364371508e-05	0.0011027235	0.236,0.65	0.0,0.0	0.443
74496	ENSG00000035403.18	VCL	chr10	+	74111908	74112112	74108970	74109156	74114183	74114387	74496	20,16	54,66	3,2	50,42	303	99	1.48009233696e-05	0.0011027235	0.108,0.073	0.019,0.015	0.073
42164	ENSG00000164690.8	SHH	chr7	-	155806710	155806839	155806295	155806557	155811822	155812463	42164	22,16	73,52	16,16	1,8	228	99	1.49626930295e-05	0.00111010731895	0.116,0.118	0.874,0.465	-0.552
5027	ENSG00000161558.11	TMEM143	chr19	-	48360071	48360183	48345159	48345354	48363290	48363674	5027	32,28	2,3	17,12	12,7	211	99	1.50417809788e-05	0.00111347028974	0.882,0.814	0.399,0.446	0.425
28153	ENSG00000049192.15	ADAMTS6	chr5	-	65297107	65297244	65291328	65291470	65299984	65300131	28153	32,30	31,41	1,0	9,3	236	99	1.50749217093e-05	0.00111347028974	0.302,0.235	0.045,0.0	0.246
38621	ENSG00000145425.10	RPS3A	chr4	+	151100974	151101085	151099628	151099714	151102870	151103079	38621	348,328	43,34	986,755	44,41	210	99	1.50706432013e-05	0.00111347028974	0.792,0.82	0.914,0.897	-0.099
43014	ENSG00000168096.15	ANKS3	chr16	-	4717442	4717547	4714155	4714186	4724749	4724831	43014	10,6	11,20	1,0	20,11	204	99	1.51670824147e-05	0.00111697284963	0.306,0.127	0.024,0.0	0.204
58036	ENSG00000074054.21	CLASP1	chr2	-	121409023	121409047	121407470	121407715	121410865	121410969	58036	74,61	62,74	17,22	60,53	123	99	1.51518781776e-05	0.00111697284963	0.49,0.399	0.186,0.25	0.227
26279	ENSG00000119688.21	ABCD4	chr14	-	74288206	74288259	74287809	74287886	74288715	74288765	26279	149,130	0,0	165,105	10,5	152	99	1.53321052792e-05	0.00112746295831	1.0,1.0	0.915,0.932	0.077
30844	ENSG00000079819.19	EPB41L2	chr6	-	130872370	130872538	130870327	130870381	130876673	130876775	30844	26,23	0,3	10,4	8,4	267	99	1.54105718784e-05	0.00113156656538	1.0,0.74	0.317,0.27	0.577
69585	ENSG00000151612.18	ZNF827	chr4	-	145763089	145763122	145757626	145761598	145763401	145763468	69585	2,0	5,1	1,5	0,1	132	99	1.54358918308e-05	0.00113176140235	0.231,0.0	1.0,0.789	-0.779
35078	ENSG00000223745.8	CCDC18-AS1	chr1	-	93315148	93315269	93264646	93264772	93324634	93324691	35078	4,5	2,3	7,3	0,0	220	99	1.54675556279e-05	0.00113242011739	0.474,0.429	1.0,1.0	-0.548
33313	ENSG00000143624.14	INTS3	chr1	+	153753700	153753818	153752278	153752408	153754641	153754739	33313	22,14	78,79	2,1	49,35	217	99	1.56124851801e-05	0.00113841160652	0.114,0.075	0.018,0.013	0.079
56757	ENSG00000196296.14	ATP2A1	chr16	+	28903699	28903741	28903322	28903440	28904179	28904464	56757	38,29	5,11	9,6	16,9	141	99	1.55735149432e-05	0.00113841160652	0.842,0.649	0.283,0.319	0.445
76906	ENSG00000171307.19	ZDHHC16	chr10	+	97448189	97448350	97446203	97446353	97451670	97451918	76906	5,5	8,4	0,0	8,8	260	99	1.56177915617e-05	0.00113841160652	0.192,0.322	0.0,0.0	0.257
49530	ENSG00000092529.25	CAPN3	chr15	+	42408210	42408324	42403740	42403777	42409302	42409380	49530	12,15	1,1	5,3	6,4	213	99	1.57100641033e-05	0.00114346823723	0.848,0.875	0.279,0.258	0.593
26411	ENSG00000174990.8	CA5A	chr16	-	87904785	87904904	87902424	87902520	87926747	87926945	26411	42,50	93,80	127,54	90,52	218	99	1.57480583916e-05	0.00114456521623	0.17,0.221	0.391,0.32	-0.16
44538	ENSG00000164828.18	SUN1	chr7	+	849519	849603	843340	843520	851383	851482	44538	0,0	11,4	5,2	4,2	183	99	1.58361317741e-05	0.00114692214642	0.0,0.0	0.403,0.351	-0.377
66979	ENSG00000060237.19	WNK1	chr12	+	879572	880031	877093	878361	880720	880814	66979	435,295	105,107	65,45	42,37	558	99	1.58218013865e-05	0.00114692214642	0.424,0.328	0.215,0.177	0.18
69040	ENSG00000126777.18	KTN1	chr14	+	55651286	55651375	55650568	55650637	55651889	55651927	69040	16,29	341,323	12,5	481,379	188	99	1.58493977896e-05	0.00114692214642	0.024,0.045	0.013,0.007	0.025
75461	ENSG00000100867.15	DHRS2	chr14	+	23638826	23639004	23636363	23636772	23639178	23639356	75461	10728,8347	124,83	14369,11296	88,59	277	99	1.59321583785e-05	0.00115124254703	0.969,0.973	0.983,0.986	-0.013
33841	ENSG00000178950.18	GAK	chr4	-	859361	859493	851749	851974	859605	859722	33841	14,10	64,65	1,0	46,35	231	99	1.61936312898e-05	0.0011684453814	0.086,0.062	0.009,0.0	0.069
31459	ENSG00000196776.17	CD47	chr3	-	108050577	108050602	108047078	108047292	108051938	108051970	31459	5,3	3,5	0,1	7,17	124	99	1.65694439473e-05	0.00119383680481	0.571,0.324	0.0,0.045	0.425
46612	ENSG00000128641.19	MYO1B	chr2	+	191402631	191402718	191400381	191400468	191408114	191408189	46612	112,105	56,39	74,36	74,43	186	99	1.68442086452e-05	0.00121188498828	0.516,0.589	0.347,0.308	0.225
67250	ENSG00000140416.23	TPM1	chr15	+	63043705	63043831	63042746	63042943	63044026	63044152	67250	22,19	49,44	6,7	64,57	225	99	1.69169971703e-05	0.00121537062692	0.165,0.16	0.04,0.051	0.117
33212	ENSG00000187741.16	FANCA	chr16	-	89762313	89762426	89761948	89762022	89764889	89765066	33212	0,0	53,57	15,3	60,60	212	99	1.70417291796e-05	0.00122257267193	0.0,0.0	0.105,0.023	-0.064
11652	ENSG00000086300.17	SNX10	chr7	+	26345784	26346176	26293034	26293158	26346419	26346466	11652	3,10	4,8	0,0	7,6	491	99	1.73855866258e-05	0.00124213746767	0.131,0.201	0.0,0.0	0.166
47524	ENSG00000197713.15	RPE	chr2	+	210016203	210016257	210015972	210016112	210016506	210016597	47524	44,40	167,168	13,18	196,140	153	99	1.73890787266e-05	0.00124213746767	0.146,0.133	0.041,0.077	0.081
66433	ENSG00000137700.19	SLC37A4	chr11	-	119026570	119026688	119025966	119026080	119026936	119027095	66433	129,103	79,48	125,80	135,103	217	99	1.73707960855e-05	0.00124213746767	0.427,0.495	0.297,0.262	0.181
56069	ENSG00000111731.13	C2CD5	chr12	-	22519039	22519239	22518095	22518137	22523425	22523624	56069	11,5	36,40	1,0	74,43	299	99	1.74657908941e-05	0.00124583486448	0.092,0.04	0.004,0.0	0.064
38686	ENSG00000090905.19	TNRC6A	chr16	+	24793472	24793649	24789231	24791817	24794543	24794719	38686	54,59	63,50	25,20	70,52	276	99	1.75850088494e-05	0.00125254932505	0.235,0.297	0.114,0.121	0.149
24913	ENSG00000006715.16	VPS41	chr7	-	38796414	38796526	38795541	38795611	38796744	38796864	24913	16,4	34,56	0,1	48,27	211	99	1.77404331368e-05	0.00126181989595	0.181,0.032	0.0,0.017	0.098
64889	ENSG00000175634.15	RPS6KB2	chr11	+	67432355	67432492	67431367	67431515	67432599	67432657	64889	24,23	94,108	14,7	180,120	236	99	1.80088907975e-05	0.0012790923562	0.097,0.082	0.032,0.024	0.061
8629	ENSG00000182648.15	RNF32-DT	chr7	-	156603784	156603911	156584159	156584520	156605187	156605380	8629	4,1	0,0	6,0	2,2	226	99	1.80474280499e-05	0.00128000870733	1.0,1.0	0.568,0.0	0.716
2680	ENSG00000205581.11	HMGN1	chr21	-	39345829	39345958	39345145	39345274	39347378	39347478	2680	78,94	4,4	27,24	8,8	228	99	1.84812925801e-05	0.00130892116286	0.894,0.911	0.594,0.566	0.323
45451	ENSG00000080345.18	RIF1	chr2	+	151503033	151503185	151483198	151483335	151506209	151506375	45451	16,12	0,1	10,11	9,3	251	99	1.87813581933e-05	0.0013282889461	1.0,0.826	0.305,0.591	0.465
31095	ENSG00000160055.20	TMEM234	chr1	-	32217436	32217577	32217258	32217351	32221130	32221197	31095	18,17	10,10	8,2	22,12	240	99	1.96203473041e-05	0.00138566274574	0.426,0.412	0.13,0.064	0.322
48124	ENSG00000168958.20	MFF	chr2	+	227342744	227342819	227340291	227340380	227355676	227355761	48124	57,62	125,125	58,54	325,195	174	99	2.03261628123e-05	0.00143348253585	0.206,0.22	0.092,0.136	0.099
5743	ENSG00000267120.3	ENSG00000267120	chr19	-	35740379	35740564	35739709	35740088	35741023	35741228	5743	11,7	4,1	7,9	0,0	284	99	2.06640419632e-05	0.00145525568302	0.489,0.709	1.0,1.0	-0.401
40584	ENSG00000022277.13	RTF2	chr20	+	56471613	56471669	56468678	56468766	56472325	56472415	40584	11,5	2,2	1,0	2,3	155	99	2.07864721758e-05	0.00146181597494	0.778,0.615	0.242,0.0	0.576
66188	ENSG00000149300.10	C11orf52	chr11	+	111918694	111919004	111918031	111918172	111924325	111924363	66188	131,169	9,16	100,80	2,0	409	99	2.08439925301e-05	0.00146379942478	0.779,0.719	0.924,1.0	-0.213
3057	ENSG00000101193.8	GID8	chr20	+	62938599	62938824	62938152	62938253	62941490	62941620	3057	37,42	121,106	21,21	164,152	324	99	2.10657205467e-05	0.00147729282671	0.085,0.108	0.038,0.041	0.057
78504	ENSG00000118557.16	PMFBP1	chr16	-	72150607	72150829	72140411	72140582	72154210	72154459	78504	19,30	4,5	9,9	0,0	321	99	2.11975553782e-05	0.0014844532084	0.594,0.649	1.0,1.0	-0.379
49061	ENSG00000183495.15	EP400	chr12	+	131963531	131963642	131960584	131961954	131979693	131979793	49061	10,11	1,2	2,1	6,2	210	99	2.1358799521e-05	0.0014936501665	0.825,0.722	0.136,0.191	0.61
901	ENSG00000268350.8	FAM156A	chrX	-	52956272	52956346	52947253	52948705	52995305	52995464	901	3,7	4,5	12,6	0,1	173	99	2.15281787852e-05	0.00150338950339	0.3,0.445	1.0,0.774	-0.514
30603	ENSG00000221978.13	CCNL2	chr1	-	1391296	1391575	1390765	1390865	1392678	1392716	30603	878,765	2,0	561,423	9,7	378	99	2.15719895166e-05	0.00150434498401	0.991,1.0	0.942,0.941	0.054
45391	ENSG00000198870.8	STKLD1	chr9	+	133397163	133397294	133395599	133395763	133400412	133400529	45391	8,9	15,2	0,0	5,2	230	99	2.18492480236e-05	0.00152155481599	0.187,0.66	0.0,0.0	0.423
21389	ENSG00000175792.12	RUVBL1	chr3	-	128068635	128068913	128064777	128065220	128087705	128087808	21389	16,19	1,0	5,3	1,3	377	99	2.21987715384e-05	0.00154374214719	0.808,1.0	0.568,0.208	0.516
36873	ENSG00000166171.13	DPCD	chr10	+	101608866	101609044	101601202	101601336	101609366	101609661	36873	3,2	0,0	9,8	4,1	277	99	2.22322352292e-05	0.00154391896694	1.0,1.0	0.446,0.741	0.406
8437	ENSG00000121067.19	SPOP	chr17	-	49622205	49622283	49621945	49622067	49622732	49622876	8437	11,12	127,130	0,0	100,82	177	99	2.22895652195e-05	0.00154575039024	0.046,0.049	0.0,0.0	0.048
2159	ENSG00000203280.4	KIAA1671-AS1	chr22	-	25110000	25110118	25102432	25102918	25112186	25112423	2159	6,6	3,2	2,4	0,0	217	99	2.31016182171e-05	0.00159984313342	0.477,0.578	1.0,1.0	-0.473
82497	ENSG00000166377.21	ATP9B	chr18	+	79372558	79372685	79359353	79359462	79372824	79372882	82497	4,5	8,6	0,0	15,5	226	99	2.32353617001e-05	0.00160687651669	0.18,0.267	0.0,0.0	0.224
82690	ENSG00000186111.11	PIP5K1C	chr19	-	3661372	3661526	3660965	3661083	3661870	3662001	82690	6,22	35,43	1,3	43,32	253	99	2.33518459544e-05	0.00161269850671	0.063,0.167	0.009,0.035	0.093
40237	ENSG00000188895.12	MSL1	chr17	+	40131219	40131345	40129244	40129627	40131536	40131584	40237	22,21	113,98	6,8	141,110	225	99	2.35027074013e-05	0.00162087525311	0.079,0.086	0.018,0.031	0.058
41722	ENSG00000179818.17	PCBP1-AS1	chr2	-	70018014	70018131	69996559	69996888	70051202	70051304	41722	8,6	2,3	8,1	0,0	216	99	2.36946883201e-05	0.00163186135519	0.647,0.478	1.0,1.0	-0.438
6665	ENSG00000114346.14	ECT2	chr3	+	172818547	172818814	172816690	172816837	172820147	172820311	6665	19,18	49,47	3,4	43,45	366	99	2.38014246835e-05	0.00163695445712	0.095,0.094	0.019,0.023	0.074
54358	ENSG00000168952.16	STXBP6	chr14	-	24987885	24987972	24974664	24974850	25049877	25049894	54358	8,14	15,11	2,0	13,12	186	99	2.39662586258e-05	0.00164602374064	0.221,0.404	0.076,0.0	0.275
68729	ENSG00000171295.13	ZNF440	chr19	+	11830273	11830409	11814343	11814450	11830616	11830677	68729	12,8	0,0	4,12	3,2	235	99	2.4174847396e-05	0.00165806910073	1.0,1.0	0.36,0.717	0.462
12045	ENSG00000021355.13	SERPINB1	chr6	-	2841215	2841475	2840418	2840594	2841811	2841848	12045	52,42	246,231	39,20	383,311	359	99	2.43854897873e-05	0.00167022207211	0.055,0.048	0.027,0.017	0.03
23295	ENSG00000124523.17	SIRT5	chr6	+	13594429	13594845	13591668	13591894	13596962	13597016	23295	3,3	0,1	0,0	2,1	515	99	2.44390576775e-05	0.00167159806698	1.0,0.366	0.0,0.0	0.683
52438	ENSG00000156968.9	MPV17L	chr16	+	15399430	15399548	15396083	15396207	15400786	15400857	52438	29,44	10,4	22,5	24,14	217	99	2.45095274586e-05	0.00167412478185	0.57,0.834	0.295,0.14	0.484
28436	ENSG00000135486.19	HNRNPA1	chr12	+	54285984	54286112	54284257	54284317	54286661	54286732	28436	41,41	71,78	21,10	100,59	227	99	2.47882101591e-05	0.00169084716046	0.201,0.186	0.084,0.069	0.117
24235	ENSG00000198860.14	TSEN15	chr1	+	184070615	184070732	184054727	184054863	184072156	184072298	24235	9,8	25,35	0,1	25,25	216	99	2.48348307846e-05	0.00169171614721	0.142,0.095	0.0,0.018	0.11
54458	ENSG00000120963.12	ZNF706	chr8	-	101202332	101202452	101201715	101201743	101205434	101205732	54458	25,49	201,172	9,10	141,145	219	99	2.50157688598e-05	0.00170171982962	0.053,0.114	0.028,0.03	0.055
13370	ENSG00000158806.14	NPM2	chr8	+	22024723	22025306	22024124	22024257	22025435	22025521	13370	171,137	1,0	90,95	2,8	682	99	2.52422860503e-05	0.00171479263235	0.961,1.0	0.867,0.633	0.23
55398	ENSG00000122483.18	CCDC18	chr1	+	93237261	93237380	93236247	93236390	93239309	93239473	55398	2,12	10,14	0,0	12,6	218	99	2.5422766292e-05	0.00172470671702	0.083,0.28	0.0,0.0	0.182
41006	ENSG00000138095.20	LRPPRC	chr2	-	43890222	43890362	43889733	43889876	43894544	43894629	41006	26,33	541,547	10,11	860,696	239	99	2.549784044e-05	0.00172745274221	0.02,0.024	0.005,0.007	0.016
38580	ENSG00000118495.21	PLAGL1	chr6	-	143966157	143966198	143964786	143964818	143968906	143968978	38580	1,6	0,0	1,4	4,1	140	99	2.55502013031e-05	0.00172865460876	1.0,1.0	0.15,0.739	0.555
4924	ENSG00000126457.22	PRMT1	chr19	+	49679871	49679925	49677270	49677316	49680486	49680588	4924	47,54	514,454	127,107	633,520	153	99	2.58805068861e-05	0.00174863273252	0.056,0.071	0.115,0.118	-0.053
17495	ENSG00000204261.9	PSMB8-AS1	chr6	+	32844569	32844870	32844107	32844274	32845329	32846484	17495	5,4	0,0	2,3	1,2	400	99	2.64036265454e-05	0.00178156686086	1.0,1.0	0.331,0.271	0.699
39218	ENSG00000119185.13	ITGB1BP1	chr2	-	9419989	9420100	9418625	9418732	9422478	9422566	39218	37,52	17,14	39,31	69,29	210	99	2.64884830381e-05	0.00178247499538	0.506,0.636	0.21,0.335	0.298
66368	ENSG00000110274.16	CEP164	chr11	+	117408525	117408755	117407924	117408032	117408889	117409028	66368	20,17	14,11	4,6	19,18	329	99	2.64584859684e-05	0.00178247499538	0.301,0.317	0.06,0.091	0.233
79163	ENSG00000175063.17	UBE2C	chr20	+	45815389	45815540	45814383	45814470	45815853	45815913	79163	4,1	0,0	3,3	3,1	250	99	2.67490914171e-05	0.00179758934529	1.0,1.0	0.284,0.543	0.587
65218	ENSG00000081307.15	UBA5	chr3	+	132660898	132661048	132660600	132660698	132665822	132665868	65218	22,15	45,38	5,5	58,41	249	99	2.67996620493e-05	0.00179856710455	0.163,0.136	0.033,0.046	0.11
70355	ENSG00000196498.14	NCOR2	chr12	-	124327408	124327633	124326190	124326370	124330844	124330898	70355	225,208	1,0	221,206	3,12	324	99	2.71502847263e-05	0.00181965217003	0.986,1.0	0.957,0.84	0.095
5837	ENSG00000126261.13	UBA2	chr19	+	34430092	34430186	34428351	34428570	34430575	34430659	5837	65,50	168,163	36,26	265,146	193	99	2.76306980573e-05	0.00184731737138	0.166,0.136	0.065,0.084	0.077
66388	ENSG00000118058.24	KMT2A	chr11	+	118471661	118471985	118468774	118468844	118474178	118474315	66388	31,39	2,5	27,20	0,0	423	99	2.76370606721e-05	0.00184731737138	0.784,0.646	1.0,1.0	-0.285
82416	ENSG00000115257.15	PCSK4	chr19	-	1482895	1483020	1482352	1482475	1483283	1483463	82416	32,18	6,3	17,10	0,0	224	99	2.83890481552e-05	0.00189504487091	0.702,0.726	1.0,1.0	-0.286
13178	ENSG00000176731.12	RBIS	chr8	-	85219235	85219363	85217385	85217502	85220305	85220384	13178	208,188	220,262	258,211	531,464	227	99	2.84906834482e-05	0.00189929014052	0.292,0.238	0.175,0.166	0.095
36800	ENSG00000234741.10	GAS5	chr1	-	173864483	173864502	173864143	173864304	173864674	173864704	36800	52,65	20,19	168,117	22,7	118	99	2.87816583959e-05	0.00191612931382	0.686,0.742	0.865,0.933	-0.185
37462	ENSG00000272645.5	GTF2IP20	chr1	-	223952384	223952442	223951478	223952291	223954476	223954667	37462	5,5	0,0	2,2	2,2	157	99	2.88532370828e-05	0.00191833685856	1.0,1.0	0.387,0.387	0.613
48516	ENSG00000091073.20	DTX2	chr7	+	76476942	76477178	76463544	76463709	76480420	76480447	48516	0,0	2,4	5,4	3,2	335	99	2.89167495441e-05	0.0019200029541	0.0,0.0	0.33,0.371	-0.351
79291	ENSG00000188176.12	SMTNL2	chr17	+	4592928	4593171	4592360	4592448	4593821	4593897	79291	4,5	0,0	14,10	4,1	342	99	2.93005090539e-05	0.00194290002333	1.0,1.0	0.503,0.743	0.377
33448	ENSG00000049246.15	PER3	chr1	+	7787197	7787246	7785522	7785586	7788044	7788338	33448	2,2	1,0	1,0	1,1	148	99	2.94962873356e-05	0.00195328796148	0.572,1.0	0.401,0.0	0.586
71401	ENSG00000185504.17	FAAP100	chr17	-	81551927	81552052	81550247	81551203	81553073	81553127	71401	12,11	0,0	8,4	1,4	224	99	2.97286909459e-05	0.00196607055314	1.0,1.0	0.78,0.307	0.457
67277	ENSG00000182326.17	C1S	chr12	+	7063537	7063895	7062474	7063067	7064266	7064392	67277	12,18	102,63	3,0	94,50	457	99	2.99024848975e-05	0.00197494837754	0.025,0.058	0.007,0.0	0.038
52420	ENSG00000197555.10	SIPA1L1	chr14	+	71413947	71414014	71321121	71321181	71512742	71512845	52420	12,12	5,2	3,4	0,0	166	99	2.99618831079e-05	0.00197625731237	0.589,0.782	1.0,1.0	-0.315
20285	ENSG00000156110.15	ADK	chr10	+	74525255	74525426	74398470	74398579	74589281	74589317	20285	323,309	13,14	659,514	6,6	270	99	3.01759654124e-05	0.00198775214909	0.901,0.89	0.976,0.969	-0.077
15091	ENSG00000250722.6	SELENOP	chr5	-	42810690	42810778	42808150	42808366	42825440	42825896	15091	164,140	35,35	148,113	92,50	187	99	3.06563032832e-05	0.00201194527759	0.713,0.679	0.46,0.545	0.193
29989	ENSG00000237187.9	NR2F1-AS1	chr5	-	93543981	93544024	93438702	93438741	93544794	93544915	29989	4,1	2,1	0,0	1,1	142	99	3.05867029379e-05	0.00201194527759	0.582,0.411	0.0,0.0	0.496
65851	ENSG00000149231.16	CCDC82	chr11	-	96386253	96386293	96383961	96384761	96389843	96389865	65851	77,82	8,6	62,45	0,0	139	99	3.06641236155e-05	0.00201194527759	0.873,0.907	1.0,1.0	-0.11
48191	ENSG00000135541.22	AHI1	chr6	-	135495538	135495709	135492227	135492291	135497187	135497249	48191	4,6	3,7	0,0	5,4	270	99	3.08339779451e-05	0.00202043484616	0.328,0.239	0.0,0.0	0.283
62305	ENSG00000137497.19	NUMA1	chr11	-	72068104	72068231	72050661	72050833	72069841	72070063	62305	7,8	3,2	9,1	0,0	226	99	3.0888545697e-05	0.00202135776566	0.505,0.637	1.0,1.0	-0.429
81060	ENSG00000085721.13	RRN3	chr16	-	15086364	15086454	15086128	15086258	15091314	15091371	81060	234,243	28,18	118,66	27,31	189	99	3.10642639413e-05	0.00203019602468	0.814,0.876	0.696,0.527	0.234
35605	ENSG00000117448.14	AKR1A1	chr1	+	45552435	45552563	45550542	45551155	45566568	45566688	35605	83,87	0,1	183,114	11,8	227	99	3.11399720431e-05	0.00203248358704	1.0,0.974	0.879,0.861	0.117
36801	ENSG00000234741.10	GAS5	chr1	-	173864483	173864506	173863900	173864304	173864674	173864704	36801	435,399	20,19	1132,761	22,7	122	99	3.13857529428e-05	0.00204585121434	0.946,0.945	0.977,0.989	-0.037
32504	ENSG00000138018.19	SELENOI	chr2	+	26383298	26383347	26373366	26373629	26389004	26395885	32504	5,1	0,0	0,3	3,1	148	99	3.15904842301e-05	0.0020553030518	1.0,1.0	0.0,0.667	0.666
78134	ENSG00000166548.17	TK2	chr16	-	66547970	66548065	66536963	66537017	66548977	66549009	78134	9,4	1,4	0,1	7,3	194	99	3.16130809274e-05	0.0020553030518	0.821,0.338	0.0,0.145	0.507
66127	ENSG00000186204.15	CYP4F12	chr19	+	15696160	15696225	15685067	15685197	15696429	15696512	66127	24,22	0,1	68,44	14,8	164	99	3.17067072537e-05	0.0020587094927	1.0,0.93	0.746,0.769	0.208
21625	ENSG00000100503.26	NIN	chr14	-	50756491	50758630	50754741	50754867	50759856	50760359	21625	14,12	21,1	182,120	6,11	2238	99	3.1770641286e-05	0.00206018167539	0.029,0.347	0.573,0.325	-0.261
58123	ENSG00000165219.23	GAPVD1	chr9	+	125268935	125268984	125261809	125261959	125287761	125287883	58123	4,12	3,3	4,3	0,0	148	99	3.22178205818e-05	0.00208646951942	0.471,0.728	1.0,1.0	-0.401
18421	ENSG00000090989.18	EXOC1	chr4	+	55888887	55888932	55882726	55883928	55890222	55890386	18421	44,59	0,3	31,28	10,5	144	99	3.2333796017e-05	0.00208907774516	1.0,0.931	0.681,0.794	0.228
82610	ENSG00000185761.11	ADAMTSL5	chr19	-	1511624	1511727	1510844	1510917	1512962	1513019	82610	2,2	0,0	0,1	7,0	202	99	3.23417735877e-05	0.00208907774516	1.0,1.0	0.0,1.0	0.5
34661	ENSG00000162520.15	SYNC	chr1	-	32684009	32684089	32679905	32681860	32684257	32684382	34661	1,1	3,3	36,23	3,5	179	99	3.26246412043e-05	0.00210462656327	0.156,0.156	0.869,0.718	-0.637
57441	ENSG00000165533.19	TTC8	chr14	+	88875025	88875109	88872329	88872452	88877293	88877951	57441	66,89	1,5	75,44	12,14	183	99	3.27002871898e-05	0.00210678456732	0.973,0.906	0.772,0.63	0.238
81601	ENSG00000136936.11	XPA	chr9	-	97682199	97682430	97674908	97675587	97684922	97685040	81601	32,26	35,31	15,8	52,37	330	99	3.27989611028e-05	0.00211041872013	0.215,0.201	0.08,0.061	0.138
32712	ENSG00000128655.19	PDE11A	chr2	-	177669492	177669567	177663865	177663949	177675454	177675518	32712	1,2	0,0	2,2	3,1	174	99	3.29408877358e-05	0.00211410214079	1.0,1.0	0.275,0.532	0.597
60734	ENSG00000079393.21	DUSP13	chr10	-	75107991	75108209	75101866	75101961	75109008	75109191	60734	6,14	2,1	2,0	6,1	317	99	3.29293846054e-05	0.00211410214079	0.484,0.814	0.094,0.0	0.602
45937	ENSG00000213160.10	KLHL23	chr2	+	169697892	169697982	169697360	169697531	169741384	169741537	45937	3,1	1,0	0,1	1,2	189	99	3.29833367032e-05	0.0021141090949	0.611,1.0	0.0,0.208	0.702
1157	ENSG00000123130.17	ACOT9	chrX	-	23734340	23734367	23733171	23733217	23735918	23736016	1157	8,4	63,59	16,11	31,28	126	99	3.40945010702e-05	0.00216967922696	0.091,0.051	0.289,0.236	-0.191
63937	ENSG00000134574.12	DDB2	chr11	+	47237618	47237712	47235269	47235412	47237836	47237900	63937	15,16	93,78	9,3	159,110	193	99	3.40108423946e-05	0.00216967922696	0.076,0.095	0.028,0.014	0.064
64002	ENSG00000096093.16	EFHC1	chr6	+	52481545	52481662	52479639	52479787	52488556	52488675	64002	2,0	1,2	2,3	0,0	216	99	3.39219802259e-05	0.00216967922696	0.478,0.0	1.0,1.0	-0.761
69384	ENSG00000139405.16	RITA1	chr12	+	113186192	113186316	113185525	113186021	113186682	113187048	69384	69,57	0,0	71,55	5,5	223	99	3.41110370944e-05	0.00216967922696	1.0,1.0	0.863,0.83	0.153
69468	ENSG00000120802.14	TMPO	chr12	+	98544950	98545061	98537474	98537572	98546358	98546447	69468	105,92	16,11	140,82	4,2	210	99	3.40787194374e-05	0.00216967922696	0.756,0.798	0.943,0.951	-0.17
79765	ENSG00000005339.15	CREBBP	chr16	-	3777612	3777657	3774568	3774693	3778010	3778172	79765	49,66	12,20	50,47	1,4	144	99	3.40810940833e-05	0.00216967922696	0.737,0.694	0.972,0.89	-0.216
12953	ENSG00000198182.13	ZNF607	chr19	-	37706381	37706583	37699324	37699895	37707913	37708009	12953	8,5	13,23	0,0	19,18	301	99	3.41695999768e-05	0.00217026729119	0.168,0.067	0.0,0.0	0.118
63279	ENSG00000182054.10	IDH2	chr15	-	90091552	90091644	90088586	90088747	90102275	90102468	63279	62,82	5,6	71,66	0,0	191	99	3.42072131175e-05	0.00217026729119	0.865,0.876	1.0,1.0	-0.129
50169	ENSG00000086848.15	ALG9	chr11	-	111788440	111788569	111786280	111786520	111805093	111805315	50169	7,4	3,6	0,0	3,1	228	99	3.4300315267e-05	0.00217341248934	0.503,0.224	0.0,0.0	0.363
61386	ENSG00000136238.19	RAC1	chr7	+	6398661	6398718	6391923	6392041	6400125	6400188	61386	5,3	651,601	31,24	843,656	156	99	3.44395915954e-05	0.00217947179715	0.005,0.003	0.023,0.023	-0.019
75094	ENSG00000137860.12	SLC28A2	chr15	+	45272294	45272393	45270194	45270276	45272672	45272784	75094	2,1	0,0	6,0	2,2	198	99	3.46587524613e-05	0.00219056477107	1.0,1.0	0.6,0.0	0.7
69013	ENSG00000019144.20	PHLDB1	chr11	+	118634922	118635051	118632158	118632296	118635392	118635548	69013	8,4	34,4	0,0	29,17	228	99	3.4759001698e-05	0.00219412353196	0.093,0.303	0.0,0.0	0.198
37709	ENSG00000221988.13	PPT2	chr6	+	32154195	32154404	32153440	32153636	32154586	32154777	37709	242,248	2,1	134,109	5,8	308	99	3.48236528607e-05	0.00219542905428	0.975,0.988	0.896,0.814	0.127
66107	ENSG00000177917.12	ARL6IP6	chr2	+	152732530	152732580	152720532	152720586	152734993	152735126	66107	9,12	135,149	4,0	231,172	149	99	3.4963250666e-05	0.00220145027617	0.042,0.051	0.011,0.0	0.041
17687	ENSG00000163644.15	PPM1K	chr4	-	88270999	88271189	88268761	88268906	88277142	88277243	17687	6,14	12,13	1,2	22,12	289	99	3.52501872866e-05	0.00221672179019	0.146,0.269	0.015,0.054	0.173
29524	ENSG00000177119.17	ANO6	chr12	+	45270461	45270524	45216084	45216391	45302013	45302093	29524	22,17	92,88	2,2	73,25	162	99	3.55731528091e-05	0.00223421772693	0.128,0.106	0.016,0.047	0.085
83274	ENSG00000105700.11	KXD1	chr19	+	18560099	18560550	18557897	18557914	18562035	18562157	83274	124,91	81,95	57,57	104,97	550	99	3.57034585965e-05	0.00223958466229	0.216,0.147	0.09,0.096	0.088
14906	ENSG00000103275.21	UBE2I	chr16	+	1312346	1312667	1309802	1310253	1314019	1314096	14906	25,22	0,0	27,14	1,5	420	99	3.60817034611e-05	0.00226047118634	1.0,1.0	0.864,0.398	0.369
29950	ENSG00000056998.20	GYG2	chrX	+	2875809	2875914	2861521	2861722	2881051	2881091	29950	70,67	3,7	94,64	0,0	204	99	3.65121549941e-05	0.00228457194362	0.919,0.823	1.0,1.0	-0.129
755	ENSG00000102053.13	ZC3H12B	chrX	+	65445905	65446000	65398592	65398704	65488645	65489409	755	0,0	7,2	5,3	3,6	194	99	3.70394631192e-05	0.00231466512266	0.0,0.0	0.46,0.203	-0.332
8076	ENSG00000111832.13	RWDD1	chr6	+	116574057	116574171	116571488	116571655	116580294	116580360	8076	89,114	86,74	94,64	145,128	213	99	3.71001713276e-05	0.0023155608182	0.325,0.417	0.232,0.189	0.16
5026	ENSG00000161558.11	TMEM143	chr19	-	48360071	48360176	48345159	48345354	48363290	48363531	5026	51,38	2,3	30,21	12,7	204	99	3.72681988651e-05	0.00232314411677	0.925,0.86	0.548,0.593	0.322
2291	ENSG00000100038.20	TOP3B	chr22	-	21975980	21976187	21975639	21975807	21982413	21982449	2291	35,21	0,0	27,22	2,4	306	99	3.73155270332e-05	0.00232319399039	1.0,1.0	0.814,0.64	0.273
66386	ENSG00000118058.24	KMT2A	chr11	+	118439023	118439122	118436463	118436944	118447624	118449995	66386	5,7	10,6	1,0	7,13	198	99	3.74985241101e-05	0.00233167971026	0.2,0.368	0.067,0.0	0.251
6563	ENSG00000161249.21	DMKN	chr19	-	35505938	35506049	35505717	35505765	35509910	35509961	6563	89,93	0,0	88,81	9,2	210	99	3.7629423112e-05	0.00233690886244	1.0,1.0	0.822,0.95	0.114
71941	ENSG00000277363.5	SRCIN1	chr17	-	38574875	38574974	38564117	38564313	38578489	38578791	71941	25,12	6,6	2,1	0,0	198	99	3.83281953147e-05	0.00237734797548	0.676,0.5	1.0,1.0	-0.412
78782	ENSG00000166167.18	BTRC	chr10	+	101430344	101430452	101354032	101354228	101479367	101479457	78782	23,18	0,0	22,14	4,3	207	99	3.84912356859e-05	0.00238449862163	1.0,1.0	0.725,0.691	0.292
23755	ENSG00000186001.14	LRCH3	chr3	+	197858833	197858905	197854391	197854445	197865422	197865471	23755	57,33	7,12	36,17	37,18	171	99	3.85497364715e-05	0.00238516343464	0.825,0.614	0.36,0.353	0.363
37708	ENSG00000221988.13	PPT2	chr6	+	32153998	32154404	32153576	32153636	32154586	32154777	37708	338,326	2,1	177,162	5,8	505	99	3.86231244603e-05	0.0023867465686	0.971,0.985	0.874,0.799	0.141
8689	ENSG00000172965.17	MIR4435-2HG	chr2	-	111208755	111208977	111207775	111208661	111233627	111233739	8689	1,9	2,2	7,12	0,0	321	99	3.88851560493e-05	0.00239996875982	0.134,0.581	1.0,1.0	-0.643
74089	ENSG00000198911.12	SREBF2	chr22	+	41899236	41899553	41898648	41898781	41900329	41900498	74089	75,43	557,487	23,17	463,359	416	99	3.90226459169e-05	0.00240548115219	0.031,0.021	0.012,0.011	0.015
39239	ENSG00000135018.14	UBQLN1	chr9	-	83666349	83666394	83665029	83665145	83669184	83669291	39239	193,184	18,14	134,92	31,23	144	99	3.91754640902e-05	0.00241040569983	0.881,0.9	0.748,0.733	0.15
60265	ENSG00000242086.8	MUC20-OT1	chr3	+	195699029	195699207	195689338	195689438	195708133	195708268	60265	104,92	3,10	66,47	0,0	277	99	3.91990833002e-05	0.00241040569983	0.925,0.767	1.0,1.0	-0.154
53126	ENSG00000162241.13	SLC25A45	chr11	-	65379375	65379561	65376817	65377076	65379866	65379938	53126	36,23	0,0	28,18	2,4	285	99	3.9483190686e-05	0.00242191055791	1.0,1.0	0.829,0.61	0.28
73044	ENSG00000100997.20	ABHD12	chr20	-	25301718	25302034	25300212	25300884	25302218	25302346	73044	34,32	215,205	15,10	235,206	415	99	3.94646985401e-05	0.00242191055791	0.036,0.036	0.015,0.011	0.023
6821	ENSG00000197150.13	ABCB8	chr7	+	151032843	151033061	151028449	151028610	151034272	151034428	6821	6,2	2,1	0,0	1,1	317	99	3.9725348529e-05	0.0024337746962	0.484,0.384	0.0,0.0	0.434
69502	ENSG00000111785.21	RIC8B	chr12	+	106874480	106874567	106870822	106870942	106885903	106887284	69502	5,3	2,6	0,0	4,2	186	99	3.97903167012e-05	0.00243476752844	0.571,0.21	0.0,0.0	0.39
51782	ENSG00000182957.16	SPATA13	chr13	+	24222818	24224582	24160719	24160932	24249476	24249842	51782	208,203	0,0	162,103	1,5	1863	99	3.99321701919e-05	0.00244045678072	1.0,1.0	0.896,0.523	0.29
64349	ENSG00000128891.17	CCDC32	chr15	-	40539238	40539355	40531340	40532302	40557215	40557372	64349	5,1	2,1	0,0	1,1	216	99	4.00067196089e-05	0.00244202385916	0.534,0.314	0.0,0.0	0.424
9992	ENSG00000112592.15	TBP	chr6	+	170567225	170567505	170566917	170567009	170569611	170569779	9992	43,39	92,75	24,6	92,74	379	99	4.01583914855e-05	0.00244828894415	0.109,0.12	0.064,0.021	0.072
81882	ENSG00000154864.14	PIEZO2	chr18	-	10735231	10735330	10731406	10731521	10736603	10736710	81882	15,16	78,89	0,3	44,52	198	99	4.07571070282e-05	0.00248175989149	0.088,0.082	0.0,0.028	0.071
8436	ENSG00000121067.19	SPOP	chr17	-	49620620	49620670	49619233	49619385	49621945	49622067	8436	13,10	166,157	1,0	142,111	149	99	4.10165482125e-05	0.00249451555274	0.049,0.041	0.005,0.0	0.042
80820	ENSG00000115694.15	STK25	chr2	-	241497181	241497378	241496397	241496534	241497615	241497687	80820	38,14	302,210	7,6	237,199	296	99	4.11916630605e-05	0.00250211791761	0.04,0.022	0.01,0.01	0.021
81107	ENSG00000234899.11	SOX9-AS1	chr17	-	72074548	72076733	72071041	72071231	72081920	72082041	81107	95,94	4,1	110,52	0,0	2284	99	4.14558375046e-05	0.00251510500904	0.507,0.803	1.0,1.0	-0.345
31722	ENSG00000077232.19	DNAJC10	chr2	+	182739544	182739709	182731029	182731107	182740298	182740384	31722	10,21	1,5	3,11	0,0	264	99	4.22496205155e-05	0.00255704945692	0.789,0.612	1.0,1.0	-0.299
59456	ENSG00000120549.19	KIAA1217	chr10	+	24536773	24536893	24533069	24533237	24544980	24545103	59456	74,94	4,8	59,49	0,0	219	99	4.22223874571e-05	0.00255704945692	0.893,0.842	1.0,1.0	-0.133
33211	ENSG00000187741.16	FANCA	chr16	-	89762313	89762426	89761948	89762022	89762637	89762793	33211	0,0	2,4	16,1	2,3	212	99	4.24284550845e-05	0.00256476415354	0.0,0.0	0.789,0.135	-0.462
74981	ENSG00000065457.11	ADAT1	chr16	-	75618585	75618698	75617141	75617272	75620265	75620334	74981	13,30	0,2	7,2	4,3	212	99	4.26117233647e-05	0.0025727278831	1.0,0.875	0.45,0.237	0.594
62121	ENSG00000107902.14	LHPP	chr10	+	124517179	124517271	124498035	124498128	124613263	124614141	62121	87,72	5,7	53,58	0,0	191	99	4.2791302395e-05	0.00258044990324	0.9,0.842	1.0,1.0	-0.129
62091	ENSG00000179988.15	PSTK	chr10	+	122982732	122983024	122954380	122954568	122983271	122983470	62091	50,71	22,27	53,44	6,2	391	99	4.28806773324e-05	0.00258272026524	0.365,0.4	0.691,0.848	-0.387
42225	ENSG00000080822.17	CLDND1	chr3	-	98521652	98521718	98521132	98521442	98522848	98522922	42225	8,15	124,144	0,5	232,120	165	99	4.31352457945e-05	0.00259492284068	0.037,0.059	0.0,0.024	0.036
46657	ENSG00000154556.20	SORBS2	chr4	-	185651783	185651828	185649466	185649656	185652661	185652688	46657	64,71	18,6	61,35	45,20	144	99	4.41197388859e-05	0.00265095388967	0.71,0.891	0.482,0.546	0.286
75008	ENSG00000125648.15	SLC25A23	chr19	-	6453980	6454088	6444150	6444301	6454322	6454405	75008	118,104	0,0	106,87	7,4	207	99	4.47421495617e-05	0.00268512051654	1.0,1.0	0.879,0.912	0.105
18825	ENSG00000049167.16	ERCC8	chr5	-	60892036	60893643	60890623	60891086	60898275	60898400	18825	53,49	57,49	13,23	50,52	1706	99	4.50807541292e-05	0.00270132767915	0.051,0.055	0.015,0.025	0.033
71213	ENSG00000188002.12	PDCD6P1	chr5	-	1626785	1626926	1611472	1612072	1632643	1632906	71213	9,6	0,0	11,5	3,2	240	99	4.51204118566e-05	0.00270132767915	1.0,1.0	0.602,0.508	0.445
32079	ENSG00000143127.13	ITGA10	chr1	-	145895982	145896096	145895630	145895711	145896267	145896352	32079	42,46	0,2	4,6	1,5	213	99	4.57068732639e-05	0.00273316154364	1.0,0.914	0.65,0.358	0.453
18555	ENSG00000197565.17	COL4A6	chrX	-	108165369	108165486	108164876	108165038	108169494	108169620	18555	50,24	0,0	42,9	4,3	216	99	4.61977494228e-05	0.0027592103187	1.0,1.0	0.828,0.579	0.296
7712	ENSG00000131051.24	RBM39	chr20	-	35739392	35739547	35738967	35739017	35740823	35740887	7712	558,596	166,144	270,252	141,109	254	99	4.65367002429e-05	0.00277613378713	0.567,0.617	0.427,0.474	0.141
62415	ENSG00000148803.12	FUOM	chr10	-	133357186	133357462	133356942	133357013	133357922	133358001	62415	61,52	0,0	54,31	2,5	375	99	4.69637829364e-05	0.00279826807374	1.0,1.0	0.877,0.621	0.251
44811	ENSG00000197111.16	PCBP2	chr12	+	53465931	53465973	53464759	53464852	53467220	53467293	44811	2465,2388	66,75	3059,2379	138,143	141	99	4.72460029787e-05	0.00281172845617	0.963,0.957	0.94,0.921	0.029
44917	ENSG00000161267.12	BDH1	chr3	-	197538305	197538952	197533488	197533561	197546360	197546486	44917	265,293	137,135	165,170	166,132	746	99	4.73346976798e-05	0.00281301277546	0.204,0.224	0.117,0.146	0.082
58180	ENSG00000153140.9	CETN3	chr5	-	90396492	90396564	90393709	90394107	90399357	90399549	58180	29,8	133,152	10,5	257,161	171	99	4.73802596416e-05	0.00281301277546	0.112,0.03	0.022,0.018	0.051
81292	ENSG00000123136.15	DDX39A	chr19	-	14410420	14410605	14409741	14410334	14410988	14411172	81292	16,13	25,24	4,5	48,27	284	99	4.76522258797e-05	0.0028257996323	0.182,0.159	0.028,0.061	0.126
39000	ENSG00000134352.21	IL6ST	chr5	-	55948101	55948982	55947492	55947589	55951463	55951604	39000	86,79	322,375	29,19	260,181	980	99	4.78951573286e-05	0.00283683641824	0.026,0.021	0.011,0.01	0.013
68622	ENSG00000139531.13	SUOX	chr12	+	56001308	56001472	55997297	55997339	56002211	56002271	68622	15,7	7,6	2,1	6,12	263	99	4.81071951277e-05	0.00284601938379	0.446,0.305	0.111,0.03	0.305
904	ENSG00000268350.8	FAM156A	chrX	-	52956272	52956755	52947253	52948705	52995305	52995472	904	3,10	4,5	11,10	0,1	582	99	4.83271109001e-05	0.00285227065526	0.113,0.254	1.0,0.63	-0.631
70356	ENSG00000196498.14	NCOR2	chr12	-	124327546	124327633	124326179	124326370	124330844	124330898	70356	66,71	1,0	84,81	3,12	186	99	4.83093911933e-05	0.00285227065526	0.972,1.0	0.937,0.782	0.126
28897	ENSG00000119801.13	YPEL5	chr2	+	30148244	30148541	30146940	30147062	30155849	30155910	28897	108,109	8,17	135,90	1,3	396	99	4.89718262975e-05	0.00288690939653	0.771,0.616	0.971,0.882	-0.233
1802	ENSG00000100320.24	RBFOX2	chr22	-	35756104	35756144	35746472	35746561	35759887	35760020	1802	74,82	1,1	59,66	8,6	139	99	4.91605521094e-05	0.00289120792388	0.981,0.983	0.84,0.887	0.119
41665	ENSG00000185485.14	SDHAP1	chr3	-	195960299	195960423	195959747	195960086	195963299	195963421	41665	30,25	3,1	8,15	12,6	223	99	4.91595577157e-05	0.00289120792388	0.816,0.917	0.228,0.526	0.49
9080	ENSG00000026297.17	RNASET2	chr6	-	166948565	166948625	166946681	166946739	166952487	166952548	9080	367,324	5,17	705,533	3,5	159	99	4.94312719772e-05	0.00290118820743	0.979,0.922	0.993,0.985	-0.038
24621	ENSG00000158796.17	DEDD	chr1	-	161130814	161130843	161124137	161124526	161132550	161132667	24621	14,15	8,4	16,11	1,0	128	99	4.94464594045e-05	0.00290118820743	0.575,0.744	0.925,1.0	-0.303
18638	ENSG00000139292.13	LGR5	chr12	+	71567215	71567315	71566840	71566912	71571513	71571579	18638	55,64	127,114	24,18	110,94	199	99	5.0022447907e-05	0.00293153855216	0.177,0.218	0.098,0.087	0.105
10428	ENSG00000139540.12	SLC39A5	chr12	+	56230239	56230295	56230050	56230122	56231203	56231561	10428	28,34	146,115	11,6	113,105	155	99	5.02237619667e-05	0.00293988588366	0.109,0.159	0.059,0.035	0.087
19604	ENSG00000104852.15	SNRNP70	chr19	+	49102113	49102185	49101389	49101471	49104633	49104735	19604	121,131	420,347	92,61	424,426	171	99	5.02899903251e-05	0.00294031558188	0.143,0.179	0.112,0.077	0.066
60918	ENSG00000178498.16	DTX3	chr12	+	57605570	57605731	57604823	57604858	57606189	57606252	60918	63,70	7,16	77,48	1,2	260	99	5.07598574228e-05	0.00296431630524	0.774,0.625	0.967,0.901	-0.234
9083	ENSG00000026297.17	RNASET2	chr6	-	166955483	166955627	166952487	166952548	166956096	166956182	9083	25,25	324,277	19,12	565,464	243	99	5.1122072365e-05	0.00297097099277	0.03,0.035	0.014,0.01	0.021
18957	ENSG00000183137.15	CEP57L1	chr6	+	109100191	109100286	109095152	109095575	109106034	109106090	18957	8,2	4,1	1,2	0,0	194	99	5.11713174938e-05	0.00297097099277	0.505,0.505	1.0,1.0	-0.495
19362	ENSG00000132466.20	ANKRD17	chr4	-	73139530	73140283	73135116	73135265	73141740	73141792	19362	540,553	18,16	384,289	31,24	852	99	5.09859747602e-05	0.00297097099277	0.777,0.801	0.59,0.583	0.203
39240	ENSG00000135018.14	UBQLN1	chr9	-	83666349	83666433	83665029	83665145	83669184	83669327	39240	682,666	18,14	504,348	31,23	183	99	5.11179397644e-05	0.00297097099277	0.953,0.963	0.898,0.891	0.063
43842	ENSG00000106868.17	SUSD1	chr9	-	112052398	112052438	112041866	112041960	112058427	112058686	43842	77,83	9,8	91,54	2,0	139	99	5.11589761631e-05	0.00297097099277	0.859,0.881	0.97,1.0	-0.115
62751	ENSG00000139974.17	SLC38A6	chr14	+	61048150	61048297	61046106	61046167	61050511	61050636	62751	5,9	8,9	0,1	8,7	246	99	5.1708750889e-05	0.00299868715521	0.201,0.287	0.0,0.054	0.217
75700	ENSG00000135049.16	AGTPBP1	chr9	-	85678334	85678398	85677435	85677582	85681267	85681335	75700	58,44	4,1	42,18	11,8	163	99	5.25172319641e-05	0.00304203933782	0.898,0.964	0.699,0.577	0.293
36683	ENSG00000155906.20	RMND1	chr6	-	151408642	151408900	151405719	151405836	151417278	151417399	36683	39,45	126,146	37,25	250,216	357	99	5.25975832943e-05	0.00304316330413	0.079,0.079	0.039,0.031	0.044
48463	ENSG00000100445.18	SDR39U1	chr14	-	24441673	24441795	24440203	24440926	24442345	24442452	48463	324,337	0,0	376,262	11,5	221	99	5.29126595518e-05	0.00305784954176	1.0,1.0	0.939,0.959	0.051
20870	ENSG00000147526.20	TACC1	chr8	+	38788703	38788819	38757280	38757409	38819521	38819631	20870	115,95	0,0	56,51	2,6	215	99	5.33741566762e-05	0.0030772830125	1.0,1.0	0.928,0.796	0.138
50256	ENSG00000158864.13	NDUFS2	chr1	+	161213156	161213182	161212591	161212654	161213379	161213475	50256	2,5	7,3	0,0	2,3	125	99	5.34017653862e-05	0.0030772830125	0.185,0.569	0.0,0.0	0.377
62241	ENSG00000148396.19	SEC16A	chr9	-	136445051	136445111	136443822	136443900	136446854	136446949	62241	6,3	8,9	12,9	3,0	159	99	5.34338261168e-05	0.0030772830125	0.318,0.172	0.714,1.0	-0.612
386	ENSG00000101966.14	XIAP	chrX	+	123860166	123860293	123859826	123859905	123888618	123888718	386	7,9	4,1	1,6	0,0	226	99	5.43188221779e-05	0.00312295829849	0.434,0.798	1.0,1.0	-0.384
7552	ENSG00000166833.23	NAV2	chr11	+	20056529	20056628	20055768	20055957	20062306	20062359	7552	7,13	87,80	2,0	80,81	198	99	5.43520210167e-05	0.00312295829849	0.039,0.075	0.012,0.0	0.051
54246	ENSG00000156170.14	NDUFAF6	chr8	+	94975317	94975415	94957994	94958179	94980854	94980973	54246	3,3	2,2	4,4	0,0	197	99	5.44344144414e-05	0.00312409741089	0.43,0.43	1.0,1.0	-0.57
50929	ENSG00000151276.24	MAGI1	chr3	-	65375744	65375945	65364852	65364946	65379260	65379554	50929	176,186	5,9	74,52	20,6	300	99	5.48714996402e-05	0.00314556699028	0.921,0.872	0.55,0.741	0.251
63980	ENSG00000109919.10	MTCH2	chr11	-	47635544	47635571	47634671	47634734	47638698	47638791	63980	395,414	39,31	502,385	83,73	126	99	5.53690079074e-05	0.00317044717182	0.888,0.913	0.826,0.806	0.085
13273	ENSG00000184584.14	STING1	chr5	-	139477328	139477515	139475532	139476454	139478269	139478508	13273	13,15	0,1	14,10	9,2	286	99	5.54721129796e-05	0.00317271256951	1.0,0.839	0.35,0.634	0.427
28745	ENSG00000077782.22	FGFR1	chr8	-	38429246	38429390	38428345	38428435	38429681	38429948	28745	24,11	22,25	9,4	52,34	243	99	5.56733089513e-05	0.00318057664674	0.308,0.152	0.066,0.046	0.174
65683	ENSG00000075413.19	MARK3	chr14	+	103490951	103491107	103480386	103480490	103491776	103492034	65683	14,13	94,87	3,1	96,56	255	99	5.60547088154e-05	0.00319870590384	0.055,0.055	0.012,0.007	0.045
66912	ENSG00000229425.5	ENSG00000229425	chr21	-	15441777	15441847	15404623	15405764	15444023	15444081	66912	7,3	7,7	0,0	2,3	169	99	5.67060792888e-05	0.00322849628845	0.369,0.201	0.0,0.0	0.285
68754	ENSG00000179912.21	R3HDM2	chr12	-	57289008	57289040	57283823	57284056	57292571	57292649	68754	103,122	7,8	77,71	0,0	131	99	5.66458896828e-05	0.00322849628845	0.917,0.92	1.0,1.0	-0.081
38382	ENSG00000042088.14	TDP1	chr14	+	89983113	89983276	89980539	89980632	89984515	89984683	38382	8,12	56,33	1,2	52,41	262	99	5.69280061405e-05	0.00323743994829	0.051,0.121	0.007,0.018	0.073
45202	ENSG00000267586.7	LINC00907	chr18	+	42335083	42335303	42289503	42289594	42453931	42454098	45202	6,4	3,1	1,3	0,0	319	99	5.70344947056e-05	0.00323980586478	0.383,0.554	1.0,1.0	-0.531
72245	ENSG00000165819.12	METTL3	chr14	-	21508135	21508235	21503663	21503881	21509483	21509554	72245	2,0	2,1	2,2	0,0	199	99	5.7167040216e-05	0.00324364486935	0.332,0.0	1.0,1.0	-0.834
2581	ENSG00000160209.19	PDXK	chr21	+	43732138	43732647	43719222	43719381	43734068	43734123	2581	115,118	115,92	92,50	135,114	608	99	5.82525200237e-05	0.00330148306164	0.14,0.173	0.1,0.067	0.073
3069	ENSG00000232803.1	SLCO4A1-AS1	chr20	-	62664923	62665497	62663030	62663487	62666384	62666622	3069	67,41	0,1	142,130	9,11	673	99	5.89577686937e-05	0.0033370350153	1.0,0.858	0.699,0.635	0.262
23477	ENSG00000107164.17	FUBP3	chr9	+	130631160	130631293	130630627	130630788	130631556	130631630	23477	29,30	88,96	16,7	132,77	232	99	5.90803098982e-05	0.0033370350153	0.123,0.118	0.049,0.037	0.077
33657	ENSG00000186301.8	MST1P2	chr1	+	16647783	16647952	16647462	16647581	16648067	16648198	33657	866,253	5,0	435,498	15,7	268	99	5.90626070929e-05	0.0033370350153	0.985,1.0	0.915,0.963	0.053
43840	ENSG00000106868.17	SUSD1	chr9	-	112042100	112042165	112041866	112041960	112052398	112052438	43840	17,12	49,59	5,1	65,43	164	99	5.93083860895e-05	0.00334613223258	0.173,0.109	0.044,0.014	0.112
80151	ENSG00000278259.5	MYO19	chr17	-	36533159	36533423	36532526	36532681	36533952	36534104	80151	13,9	49,46	1,3	63,48	363	99	5.96640663488e-05	0.00336240010932	0.067,0.051	0.004,0.017	0.048
32957	ENSG00000068366.21	ACSL4	chrX	-	109691002	109691131	109683135	109683666	109696143	109696196	32957	38,29	129,111	7,4	2,1	228	99	6.00510084208e-05	0.00337658434849	0.113,0.102	0.603,0.635	-0.511
39712	ENSG00000103064.15	SLC7A6	chr16	+	68287322	68287435	68274690	68275249	68287745	68287871	39712	13,18	42,56	4,0	35,34	212	99	6.0000652412e-05	0.00337658434849	0.126,0.131	0.051,0.0	0.103
15274	ENSG00000171045.16	TSNARE1	chr8	-	142279859	142280324	142274780	142274863	142284412	142284485	15274	11,17	0,0	10,9	3,1	564	99	6.03767621035e-05	0.00339108223688	1.0,1.0	0.369,0.612	0.51
15024	ENSG00000112992.18	NNT	chr5	+	43647923	43648440	43645356	43645510	43649146	43649308	15024	23,17	69,75	4,5	76,53	616	99	6.12631043285e-05	0.00343699782273	0.051,0.035	0.008,0.015	0.032
60240	ENSG00000148584.15	A1CF	chr10	-	50862888	50862981	50859841	50859985	50864032	50864080	60240	48,35	35,33	2,5	18,11	192	99	6.21202349589e-05	0.0034772706858	0.414,0.354	0.054,0.19	0.262
76892	ENSG00000067365.15	METTL22	chr16	+	8645907	8646027	8644556	8644725	8646107	8649654	76892	66,47	55,34	13,9	31,23	219	99	6.20899484863e-05	0.0034772706858	0.352,0.385	0.159,0.15	0.214
9706	ENSG00000263001.8	GTF2I	chr7	+	74718878	74718941	74716611	74716950	74728785	74728896	9706	247,265	174,148	205,123	202,176	162	99	6.30612293747e-05	0.00352599131457	0.465,0.522	0.383,0.299	0.153
19603	ENSG00000104852.15	SNRNP70	chr19	+	49102113	49102173	49101389	49101471	49104633	49104735	19603	123,125	420,347	96,56	424,426	159	99	6.32684986637e-05	0.00352967531483	0.154,0.183	0.124,0.076	0.068
66592	ENSG00000166261.11	ZNF202	chr11	-	123740116	123740192	123730486	123730985	123740416	123740536	66592	12,2	3,2	8,3	0,0	175	99	6.32192697162e-05	0.00352967531483	0.694,0.361	1.0,1.0	-0.473
48132	ENSG00000168958.20	MFF	chr2	+	227352513	227352573	227346724	227347384	227355676	227355761	48132	438,411	48,27	322,256	56,51	159	99	6.34301462368e-05	0.00353474400865	0.85,0.905	0.782,0.758	0.107
40508	ENSG00000203721.8	LINC00862	chr1	-	200343282	200343410	200342543	200342757	200373092	200373169	40508	2,4	1,3	0,0	6,4	227	99	6.36115726017e-05	0.00354090237634	0.466,0.368	0.0,0.0	0.417
62857	ENSG00000134444.15	RELCH	chr18	+	62279773	62279856	62275373	62275473	62280359	62280442	62857	30,24	1,15	20,17	0,0	182	99	6.39611534147e-05	0.00355639682756	0.942,0.465	1.0,1.0	-0.296
47425	ENSG00000185480.12	PARPBP	chr12	+	102151569	102151800	102148229	102148463	102153868	102153976	47425	9,4	11,11	1,1	22,15	330	99	6.41380601444e-05	0.00356226638606	0.197,0.098	0.013,0.02	0.131
74093	ENSG00000198911.12	SREBF2	chr22	+	41904534	41904732	41902969	41903155	41904862	41904973	74093	30,37	201,123	12,4	107,121	297	99	6.4903883736e-05	0.00360079535425	0.047,0.091	0.036,0.011	0.046
79031	ENSG00000197912.16	SPG7	chr16	+	89555877	89556085	89554485	89554563	89556886	89557701	79031	77,47	228,184	22,14	151,131	307	99	6.51022145882e-05	0.00360778987414	0.098,0.076	0.045,0.033	0.048
68730	ENSG00000171295.13	ZNF440	chr19	+	11830282	11830409	11814272	11814450	11830616	11830677	68730	12,9	0,0	6,14	3,2	226	99	6.56606678413e-05	0.00363470377604	1.0,1.0	0.467,0.754	0.389
82584	ENSG00000099622.14	CIRBP	chr19	+	1270866	1271036	1269265	1269410	1271328	1271467	82584	259,170	0,0	138,130	4,6	269	99	6.61472115497e-05	0.00365758186034	1.0,1.0	0.927,0.889	0.092
2684	ENSG00000205581.11	HMGN1	chr21	-	39347246	39347292	39345145	39345274	39347378	39347483	2684	7,2	4,4	1,0	8,8	145	99	6.66301513653e-05	0.0036760371146	0.544,0.254	0.079,0.0	0.36
6610	ENSG00000181392.17	SYNE4	chr19	-	36006749	36006944	36005332	36005437	36008553	36008793	6610	27,20	3,1	14,17	7,13	294	99	6.66196885019e-05	0.0036760371146	0.752,0.871	0.402,0.306	0.458
47415	ENSG00000128739.23	SNRPN	chr15	+	24974641	24974957	24967931	24968082	24975357	24975509	47415	31,50	4,3	23,5	0,0	415	99	6.67018410572e-05	0.0036760371146	0.649,0.799	1.0,1.0	-0.276
53070	ENSG00000177565.18	TBL1XR1	chr3	-	177079826	177079945	177064919	177065022	177197120	177197184	53070	6,8	7,5	1,1	12,8	218	99	6.7357042455e-05	0.00370805345846	0.28,0.421	0.036,0.054	0.306
76077	ENSG00000111237.19	VPS29	chr12	-	110499534	110499546	110496822	110497002	110502048	110502099	76077	6,9	0,3	2,0	3,5	111	99	6.76317155388e-05	0.00371907399622	1.0,0.728	0.373,0.0	0.677
32977	ENSG00000062370.17	ZNF112	chr19	-	44343253	44343302	44340415	44340542	44356625	44356674	32977	7,2	8,7	0,0	3,3	148	99	6.77832133992e-05	0.00372330432149	0.369,0.16	0.0,0.0	0.265
66591	ENSG00000166261.11	ZNF202	chr11	-	123740116	123740189	123730751	123730985	123740416	123740536	66591	12,2	3,2	10,3	0,0	172	99	6.81399570598e-05	0.00373878702852	0.697,0.365	1.0,1.0	-0.469
69838	ENSG00000139436.22	GIT2	chr12	-	109945259	109945349	109939164	109939247	109947255	109947504	69838	14,8	11,16	36,25	8,5	189	99	6.93151775563e-05	0.00379909564277	0.4,0.208	0.702,0.724	-0.409
51904	ENSG00000117139.18	KDM5B	chr1	-	202766396	202766504	202764048	202764145	202766925	202767060	51904	14,14	123,119	2,1	99,62	207	99	6.99643656439e-05	0.00383047230369	0.052,0.053	0.01,0.008	0.043
222	ENSG00000102287.19	GABRE	chrX	-	151961282	151961365	151959838	151959976	151962422	151962643	222	8,6	14,17	0,0	7,4	182	99	7.01910767739e-05	0.00383447555186	0.237,0.161	0.0,0.0	0.199
30089	ENSG00000112159.13	MDN1	chr6	-	89656375	89656574	89655763	89655968	89656699	89656801	30089	15,14	38,38	4,1	37,31	298	99	7.01490480197e-05	0.00383447555186	0.116,0.109	0.035,0.011	0.089
13920	ENSG00000151247.13	EIF4E	chr4	-	98886453	98886546	98884921	98885061	98887078	98887192	13920	15,23	335,327	4,1	296,214	192	99	7.05178862895e-05	0.00384391766411	0.023,0.035	0.007,0.002	0.025
71855	ENSG00000102606.20	ARHGEF7	chr13	+	111280271	111280350	111277586	111277673	111280537	111280677	71855	77,57	8,13	92,67	2,2	178	99	7.05082863446e-05	0.00384391766411	0.843,0.709	0.962,0.949	-0.179
45442	ENSG00000080345.18	RIF1	chr2	+	151468473	151468551	151467999	151468146	151468640	151468756	45442	76,99	47,50	52,34	66,45	177	99	7.08806423597e-05	0.00385947803017	0.475,0.525	0.306,0.297	0.199
35650	ENSG00000248049.8	UBA6-DT	chr4	+	67720421	67721051	67701260	67701484	67728539	67728686	35650	190,187	46,46	249,199	23,24	729	99	7.2810239091e-05	0.00395765951062	0.359,0.356	0.595,0.53	-0.205
53879	ENSG00000087460.29	GNAS	chr20	+	58898940	58899162	58895611	58895684	58903530	58903585	53879	452,492	894,928	454,310	1307,1012	321	99	7.28423041849e-05	0.00395765951062	0.135,0.141	0.097,0.086	0.047
2492	ENSG00000215424.10	MCM3AP-AS1	chr21	+	46236223	46236326	46229220	46229266	46240836	46242999	2492	0,3	2,4	4,3	1,0	202	99	7.34878432822e-05	0.00398839293796	0.0,0.269	0.662,1.0	-0.696
48192	ENSG00000135541.22	AHI1	chr6	-	135495538	135495709	135492227	135492291	135497582	135497719	48192	4,6	6,3	0,0	2,2	270	99	7.42978946489e-05	0.00402797847743	0.196,0.423	0.0,0.0	0.309
27430	ENSG00000223546.9	LINC00630	chrX	+	102825992	102826169	102816991	102817082	102826968	102827144	27430	19,8	0,0	11,24	6,1	276	99	7.48214448988e-05	0.00405196265211	1.0,1.0	0.397,0.896	0.353
53125	ENSG00000162241.13	SLC25A45	chr11	-	65377332	65377423	65376817	65377076	65379375	65379561	53125	4,5	10,3	0,0	3,4	190	99	7.5261293685e-05	0.00407136690681	0.172,0.465	0.0,0.0	0.319
82986	ENSG00000079805.19	DNM2	chr19	+	10808568	10808580	10805915	10805967	10812263	10812377	82986	139,82	77,74	89,71	134,121	111	99	7.56094778117e-05	0.0040857757972	0.617,0.497	0.372,0.344	0.199
4051	ENSG00000197586.13	ENTPD6	chr20	+	25206521	25206590	25195700	25195867	25207075	25207397	4051	137,150	58,56	71,58	59,52	168	99	7.65355807608e-05	0.00412845423419	0.582,0.612	0.415,0.397	0.191
79156	ENSG00000230461.10	PROX1-AS1	chr1	-	213979310	213979419	213966070	213966284	213987579	213987630	79156	6,2	8,4	0,0	6,5	208	99	7.65646316088e-05	0.00412845423419	0.263,0.192	0.0,0.0	0.228
3218	ENSG00000132819.17	RBM38	chr20	+	57392396	57392492	57391636	57391818	57392653	57392777	3218	11,4	27,27	0,1	25,19	195	99	7.70935580692e-05	0.00414801556892	0.171,0.07	0.0,0.026	0.108
45324	ENSG00000188185.13	LINC00265	chr7	+	39788481	39788604	39782734	39782799	39789353	39789425	45324	8,12	3,2	6,5	0,0	222	99	7.70436910136e-05	0.00414801556892	0.543,0.728	1.0,1.0	-0.365
73546	ENSG00000126456.16	IRF3	chr19	-	49664552	49664673	49663187	49663258	49665630	49665788	73546	1,0	1,1	3,5	0,1	220	99	7.72005419025e-05	0.00414930060036	0.31,0.0	1.0,0.692	-0.691
57197	ENSG00000204792.2	LINC01291	chr2	+	74932198	74932289	74931427	74931536	74932660	74932790	57197	12,7	20,41	0,0	11,7	190	99	7.74315522377e-05	0.00415724175783	0.238,0.082	0.0,0.0	0.16
16215	ENSG00000269001.4	ZNF818P	chr19	+	53204951	53205080	53204015	53204142	53210980	53213415	16215	0,1	2,1	1,3	0,1	228	99	7.76369035246e-05	0.00415932213507	0.0,0.303	1.0,0.566	-0.631
28522	ENSG00000118518.17	RNF146	chr6	+	127285207	127285348	127282286	127282395	127286049	127286097	28522	14,6	5,10	9,6	1,0	240	99	7.75965304812e-05	0.00415932213507	0.536,0.198	0.788,1.0	-0.527
5740	ENSG00000161265.15	U2AF1L4	chr19	-	35744625	35744738	35744069	35744421	35745124	35745176	5740	23,20	2,5	9,11	0,0	212	99	7.83573876192e-05	0.00417564625807	0.843,0.651	1.0,1.0	-0.253
63213	ENSG00000143633.13	C1orf131	chr1	-	231226390	231226492	231225502	231225523	231226738	231226825	63213	5,8	42,32	2,1	86,73	201	99	7.81881553161e-05	0.00417564625807	0.055,0.11	0.011,0.007	0.074
64459	ENSG00000197603.16	CPLANE1	chr5	-	37230661	37230718	37227567	37227817	37230866	37231049	64459	6,2	3,8	0,0	5,5	156	99	7.83560410751e-05	0.00417564625807	0.559,0.137	0.0,0.0	0.348
67455	ENSG00000275778.2	ENSG00000275778	chr12	-	10884153	10884275	10883060	10883096	10973654	10973721	67455	86,61	0,1	71,39	6,4	221	99	7.83597473275e-05	0.00417564625807	1.0,0.965	0.841,0.814	0.155
69684	ENSG00000235162.9	C12orf75	chr12	+	105365806	105365842	105348601	105348626	105366616	105366696	69684	65,58	6,8	53,40	0,1	135	99	7.80791042816e-05	0.00417564625807	0.888,0.842	1.0,0.967	-0.119
13177	ENSG00000176731.12	RBIS	chr8	-	85219235	85219360	85217385	85217502	85220305	85220353	13177	141,142	220,262	190,147	531,464	224	99	7.86941075459e-05	0.00418899305317	0.221,0.193	0.137,0.123	0.077
82478	ENSG00000197971.16	MBP	chr18	-	76988299	76988527	76984774	76984894	76988876	76988912	82478	5,6	1,3	0,1	2,4	327	99	7.90219012781e-05	0.00420196224996	0.602,0.377	0.0,0.07	0.455
17971	ENSG00000138757.15	G3BP2	chr4	-	75653982	75654081	75648638	75648741	75655065	75655246	17971	99,72	473,415	28,17	294,204	198	99	7.91442676644e-05	0.00420399194548	0.095,0.08	0.045,0.04	0.045
43171	ENSG00000173166.18	RAPH1	chr2	-	203477075	203477156	203470238	203470313	203489583	203490089	43171	3,3	2,2	4,3	0,0	180	99	7.94126057487e-05	0.00421030767792	0.452,0.452	1.0,1.0	-0.548
69905	ENSG00000066933.16	MYO9A	chr15	-	71892964	71893177	71888003	71888116	71893678	71893778	69905	33,25	4,10	18,23	0,1	312	99	7.94318125534e-05	0.00421030767792	0.724,0.442	1.0,0.879	-0.357
4595	ENSG00000198300.14	PEG3	chr19	-	56829782	56829921	56824261	56824427	56833289	56833420	4595	26,24	20,19	8,6	24,20	238	99	7.99881926903e-05	0.00422999897103	0.351,0.344	0.122,0.111	0.231
60710	ENSG00000176986.16	SEC24C	chr10	+	73746629	73746716	73744390	73744437	73746804	73747004	60710	77,98	178,152	41,17	136,98	186	99	8.00574598471e-05	0.00422999897103	0.187,0.255	0.138,0.085	0.109
62778	ENSG00000148985.20	PGAP2	chr11	+	3823616	3823740	3822908	3822993	3823882	3823915	62778	5,7	4,4	0,1	7,2	223	99	7.99059863829e-05	0.00422999897103	0.357,0.437	0.0,0.182	0.306
13436	ENSG00000169696.16	ASPSCR1	chr17	+	82009931	82010052	82009485	82009567	82010801	82010868	13436	31,26	300,332	23,9	542,372	220	99	8.05880691869e-05	0.00425353370251	0.044,0.034	0.019,0.011	0.024
79888	ENSG00000185842.16	DNAH14	chr1	+	225147103	225147249	225145325	225145379	225152004	225152073	79888	6,11	2,1	1,0	1,2	245	99	8.06859711792e-05	0.00425420404113	0.548,0.816	0.288,0.0	0.538
63266	ENSG00000135829.17	DHX9	chr1	+	182855576	182855713	182854040	182854178	182856531	182856572	63266	52,52	112,133	37,28	202,138	236	99	8.09758289604e-05	0.00426498324454	0.163,0.141	0.071,0.078	0.077
55267	ENSG00000119682.18	AREL1	chr14	-	74701668	74701774	74698763	74698856	74712932	74713087	55267	3,4	2,2	7,1	0,0	205	99	8.12722665977e-05	0.0042760859257	0.42,0.491	1.0,1.0	-0.544
44549	ENSG00000167792.13	NDUFV1	chr11	+	67607298	67607616	67606953	67607076	67608395	67608478	44549	61,52	327,281	27,20	300,257	417	99	8.22001416277e-05	0.00432035291749	0.042,0.042	0.021,0.018	0.023
6921	ENSG00000145216.16	FIP1L1	chr4	+	53379072	53379117	53377640	53377923	53379224	53379264	6921	85,67	37,40	30,30	42,37	144	99	8.31697416315e-05	0.00436671752829	0.612,0.535	0.329,0.358	0.23
26324	ENSG00000170633.17	RNF34	chr12	+	121402741	121402807	121400118	121400218	121416158	121416377	26324	34,17	60,73	7,4	64,49	165	99	8.33841399902e-05	0.00437337551875	0.254,0.123	0.062,0.047	0.134
8137	ENSG00000179406.10	LINC00174	chr7	-	66467681	66467719	66450070	66450236	66476258	66476327	8137	2,4	5,3	0,0	2,1	137	99	8.47241227367e-05	0.00443433980332	0.224,0.491	0.0,0.0	0.357
24623	ENSG00000158796.17	DEDD	chr1	-	161130814	161130847	161124137	161124526	161132550	161132572	24623	39,36	8,4	35,32	1,0	132	99	8.46711207076e-05	0.00443433980332	0.785,0.871	0.963,1.0	-0.153
83090	ENSG00000104907.13	TRMT1	chr19	-	13109914	13110001	13109768	13109838	13110157	13110306	83090	94,77	0,0	74,76	4,6	186	99	8.50793115867e-05	0.00444826712758	1.0,1.0	0.908,0.871	0.111
38088	ENSG00000259080.1	ENSG00000259080	chr2	+	27601355	27601442	27599582	27599678	27603139	27603307	38088	1,5	0,0	2,1	2,1	186	99	8.6054086252e-05	0.00449452571198	1.0,1.0	0.347,0.347	0.653
76606	ENSG00000242612.7	DECR2	chr16	+	405145	405224	404955	405024	407424	407560	76606	2,1	0,0	0,2	2,1	178	99	8.61669380472e-05	0.00449571722428	1.0,1.0	0.0,0.527	0.736
258	ENSG00000010404.18	IDS	chrX	-	149502074	149502177	149500948	149501037	149503311	149503489	258	12,17	35,33	3,1	31,21	202	99	8.63233235565e-05	0.00449917522808	0.144,0.202	0.045,0.023	0.139
74154	ENSG00000240602.9	AADACP1	chr3	+	151776803	151776975	151770417	151770611	151783831	151784048	74154	10,3	6,12	0,0	4,7	271	99	8.65000513351e-05	0.00450368515455	0.378,0.084	0.0,0.0	0.231
59601	ENSG00000167508.12	MVD	chr16	-	88657145	88657247	88656260	88656561	88657435	88657582	59601	34,13	16,11	3,1	11,6	201	99	8.66764699643e-05	0.00450816960603	0.511,0.368	0.118,0.076	0.343
38582	ENSG00000118495.21	PLAGL1	chr6	-	143966157	143966230	143964786	143964818	143968906	143968978	38582	2,6	0,0	2,8	4,1	172	99	8.72164371299e-05	0.00453153373812	1.0,1.0	0.223,0.822	0.478
6878	ENSG00000106462.12	EZH2	chr7	-	148836821	148837000	148832633	148832750	148846469	148846551	6878	19,19	11,17	7,4	27,12	278	99	8.78496320138e-05	0.00455968812482	0.381,0.285	0.085,0.106	0.237
21847	ENSG00000166169.17	POLL	chr10	-	101585315	101585478	101584601	101584919	101585861	101586156	21847	146,125	0,2	118,92	4,9	262	99	8.80541232338e-05	0.00456555599916	1.0,0.959	0.918,0.794	0.123
65775	ENSG00000182919.15	C11orf54	chr11	+	93741962	93742141	93741682	93741728	93747301	93747448	65775	46,45	25,29	19,7	27,24	278	99	8.81530198602e-05	0.00456594235958	0.396,0.356	0.2,0.094	0.229
63094	ENSG00000110321.19	EIF4G2	chr11	-	10801660	10801774	10800961	10801087	10802048	10802209	63094	1674,1688	116,111	2001,1403	229,157	213	99	8.83914141429e-05	0.00457354580266	0.87,0.876	0.802,0.806	0.069
48363	ENSG00000285756.2	ENSG00000285756	chrX	-	3818656	3818703	3818441	3818500	3822072	3822285	48363	3,2	0,0	5,0	2,2	146	99	8.88581969869e-05	0.00458818886634	1.0,1.0	0.629,0.0	0.685
78016	ENSG00000140859.16	KIFC3	chr16	-	57790929	57791066	57785463	57785666	57794998	57795141	78016	21,17	1,6	8,9	0,0	236	99	8.87697467763e-05	0.00458818886634	0.898,0.543	1.0,1.0	-0.279
16228	ENSG00000164124.11	TMEM144	chr4	+	158212060	158212220	158211452	158211574	158212607	158212698	16228	11,18	92,72	11,18	21,22	259	99	8.91374921279e-05	0.00459311054638	0.044,0.087	0.167,0.238	-0.137
48761	ENSG00000115677.18	HDLBP	chr2	-	241268828	241268953	241268476	241268541	241315101	241315203	48761	16,18	203,212	30,16	114,86	224	99	8.90664152264e-05	0.00459311054638	0.034,0.036	0.104,0.076	-0.055
5714	ENSG00000196357.12	ZNF565	chr19	-	36201976	36202050	36194826	36195156	36214621	36214663	5714	11,13	0,1	8,17	4,6	173	99	9.0117333239e-05	0.00463881295459	1.0,0.882	0.534,0.619	0.365
73773	ENSG00000066427.25	ATXN3	chr14	-	92096092	92096137	92093251	92093318	92106528	92106574	73773	1,0	1,2	4,5	0,2	144	99	9.03153399474e-05	0.0046442175478	0.407,0.0	1.0,0.632	-0.613
48772	ENSG00000115677.18	HDLBP	chr2	-	241269360	241269561	241268476	241268541	241272760	241272886	48772	25,25	232,204	15,15	356,352	300	99	9.05756394853e-05	0.00465281096208	0.034,0.039	0.014,0.014	0.023
59065	ENSG00000159110.22	IFNAR2	chr21	+	33246256	33246482	33244950	33245074	33246717	33246890	59065	35,49	84,97	11,5	66,37	325	99	9.07831408081e-05	0.00465867729053	0.113,0.133	0.048,0.04	0.079
53089	ENSG00000164182.12	NDUFAF2	chr5	+	61098991	61099032	60945182	60945382	61152703	61152995	53089	50,37	10,0	72,52	0,0	140	99	9.08883761997e-05	0.00465928902672	0.78,1.0	1.0,1.0	-0.11
48815	ENSG00000168385.18	SEPTIN2	chr2	+	241324408	241324662	241315945	241315982	241325992	241326113	48815	79,82	3,9	57,27	16,14	353	99	9.20752253843e-05	0.00471529033709	0.881,0.719	0.5,0.351	0.375
73472	ENSG00000267002.4	ENSG00000267002	chr17	-	43159422	43159727	43148367	43148783	43166979	43167849	73472	25,13	0,1	17,13	5,3	404	99	9.23553317829e-05	0.00472478900743	1.0,0.761	0.454,0.515	0.396
13020	ENSG00000121022.14	COPS5	chr8	-	67060320	67060545	67059415	67059445	67061853	67062024	13020	18,17	135,122	8,9	230,187	324	99	9.34226624896e-05	0.00477450047162	0.039,0.041	0.011,0.014	0.028
3532	ENSG00000124193.16	SRSF6	chr20	+	43459152	43459420	43458360	43458509	43459770	43459895	3532	588,551	24,19	445,356	56,24	367	99	9.43045880871e-05	0.00481464456828	0.869,0.887	0.682,0.8	0.137
73363	ENSG00000148660.22	CAMK2G	chr10	-	73818208	73818267	73817478	73817554	73819531	73819645	73363	5,6	23,33	0,0	28,25	158	99	9.4999874905e-05	0.00484518769549	0.12,0.102	0.0,0.0	0.111
60135	ENSG00000108950.12	FAM20A	chr17	-	68540546	68540723	68539884	68539966	68540848	68541991	60135	113,132	54,32	67,44	59,50	276	99	9.53010770103e-05	0.00485558987367	0.429,0.597	0.289,0.24	0.249
66363	ENSG00000110274.16	CEP164	chr11	+	117354931	117356617	117351789	117351988	117361834	117361993	66363	30,17	13,13	2,2	7,7	1785	99	9.62262417691e-05	0.00489681568998	0.113,0.068	0.016,0.016	0.074
78036	ENSG00000144395.18	CCDC150	chr2	+	196677114	196677192	196676553	196676731	196677292	196677361	78036	17,27	4,5	9,4	0,0	177	99	9.63063629321e-05	0.00489681568998	0.704,0.751	1.0,1.0	-0.272
73557	ENSG00000132153.15	DHX30	chr3	+	47822096	47822231	47819235	47819264	47824766	47824863	73557	1,3	0,1	0,1	1,1	234	99	9.64574141066e-05	0.00489950675865	1.0,0.559	0.0,0.297	0.631
7549	ENSG00000166833.23	NAV2	chr11	+	20049835	20049901	20048727	20049195	20054079	20054240	7549	21,10	35,30	2,3	35,21	165	99	9.67469116223e-05	0.00490713897239	0.265,0.167	0.033,0.079	0.16
61152	ENSG00000123349.15	PFDN5	chr12	+	53296243	53296275	53295508	53295639	53297849	53297924	61152	412,428	173,157	870,649	172,180	131	99	9.68042275901e-05	0.00490713897239	0.643,0.673	0.793,0.732	-0.104
78918	ENSG00000140299.14	BNIP2	chr15	-	59668102	59668138	59662855	59664120	59668891	59668949	78918	0,0	118,128	10,5	113,94	135	99	9.76897835758e-05	0.0049470066772	0.0,0.0	0.061,0.038	-0.05
9408	ENSG00000106477.20	CEP41	chr7	-	130426628	130426759	130421852	130422007	130427954	130428018	9408	2,3	1,1	0,0	6,2	230	99	9.79456005521e-05	0.0049549359485	0.463,0.564	0.0,0.0	0.513
13699	ENSG00000229180.9	RABGEF1P1	chr7	-	66588511	66588580	66576754	66576932	66592256	66592386	13699	12,5	7,5	0,2	6,8	168	99	9.81051226902e-05	0.00495798267312	0.503,0.371	0.0,0.128	0.373
56818	ENSG00000156172.6	CFAP418	chr8	-	95252187	95252283	95244912	95247770	95259839	95259905	56818	57,69	4,6	40,46	0,0	195	99	0.000101236627994	0.00511106781837	0.879,0.854	1.0,1.0	-0.133
39412	ENSG00000161526.15	SAP30BP	chr17	+	75705610	75705693	75704755	75704814	75706007	75706092	39412	18,11	178,182	4,2	181,157	182	99	0.000101696558211	0.0051291018667	0.052,0.032	0.012,0.007	0.032
49062	ENSG00000183495.15	EP400	chr12	+	131963531	131963642	131960584	131961954	131979696	131979793	49062	18,15	15,11	2,1	13,4	210	99	0.000102057383934	0.00514210619295	0.361,0.391	0.068,0.105	0.289
29405	ENSG00000172992.13	DCAKD	chr17	-	45044390	45044664	45034773	45034999	45061074	45061080	29405	8,1	0,1	1,0	2,1	373	99	0.000102217794852	0.00514499668826	1.0,0.21	0.117,0.0	0.546
6222	ENSG00000166278.16	C2	chr6	+	31927954	31928164	31927524	31927798	31933609	31933783	6222	3097,2767	40,40	3753,3049	98,78	309	99	0.000103376504531	0.00519807879933	0.961,0.957	0.925,0.926	0.033
55919	ENSG00000250337.9	PURPL	chr5	+	27484925	27485029	27477638	27477801	27495948	27496144	55919	23,28	0,0	29,28	7,1	203	99	0.000103653867838	0.00520678196682	1.0,1.0	0.669,0.932	0.2
11740	ENSG00000198912.12	C1orf174	chr1	-	3895294	3896183	3892882	3892996	3900171	3900247	11740	23,32	36,16	19,5	41,36	988	99	0.000103820279789	0.00520989988959	0.06,0.167	0.044,0.014	0.085
55674	ENSG00000003436.16	TFPI	chr2	-	187513615	187513646	187503647	187503770	187529363	187529485	55674	1704,1555	34,47	1873,1578	90,74	130	99	0.000104115180603	0.00521945289427	0.974,0.962	0.941,0.942	0.026
6223	ENSG00000244255.5	ENSG00000244255	chr6	+	31928731	31928917	31927723	31927798	31933609	31933783	6223	1739,1463	40,40	2109,1600	98,78	285	99	0.000104813290695	0.00524917995756	0.938,0.927	0.882,0.877	0.053
48095	ENSG00000144468.17	RHBDD1	chr2	+	226837547	226837770	226836055	226836087	226838072	226838154	48095	32,27	1,6	19,6	0,0	322	99	0.000106423340958	0.00531914298035	0.908,0.58	1.0,1.0	-0.256
57577	ENSG00000172775.17	PSME3IP1	chr16	-	57175538	57175700	57174619	57174688	57178501	57178852	57577	33,30	1,1	23,13	7,4	261	99	0.000106349954548	0.00531914298035	0.926,0.919	0.555,0.552	0.369
17432	ENSG00000145348.17	TBCK	chr4	-	106254946	106255047	106251865	106252007	106260436	106260510	17432	50,44	47,46	29,20	69,53	200	99	0.000107057793111	0.00534499198737	0.345,0.321	0.172,0.157	0.168
61518	ENSG00000107829.15	FBXW4	chr10	-	101667885	101667980	101624744	101624810	101672914	101673047	61518	262,260	2,2	225,246	15,5	194	99	0.000107154612953	0.00534499198737	0.985,0.985	0.884,0.962	0.062
37501	ENSG00000092201.10	SUPT16H	chr14	-	21372468	21372717	21371873	21372044	21373337	21373430	37501	40,35	207,262	14,9	234,139	348	99	0.000108244173603	0.00539395192831	0.052,0.037	0.017,0.018	0.027
59636	ENSG00000148737.17	TCF7L2	chr10	+	113160618	113160691	113159919	113159992	113165554	113165972	59636	15,10	1,2	5,2	6,4	172	99	0.000109012893691	0.00542684226808	0.896,0.742	0.324,0.223	0.545
7966	ENSG00000269699.7	ZIM2	chr19	-	56782399	56782471	56781952	56782121	56789871	56789951	7966	2,3	4,8	2,5	1,0	171	99	0.000109165260144	0.00542901454607	0.224,0.178	0.537,1.0	-0.567
8709	ENSG00000172965.17	MIR4435-2HG	chr2	-	111248147	111248241	111236981	111239996	111344060	111344237	8709	3,4	2,2	3,3	0,0	193	99	0.000109523076524	0.00544138978499	0.435,0.506	1.0,1.0	-0.529
25911	ENSG00000068120.15	COASY	chr17	+	42562295	42562487	42562150	42562219	42562611	42562919	25911	429,414	31,17	448,352	8,7	291	99	0.000110424433422	0.00547569632123	0.825,0.892	0.95,0.945	-0.089
31168	ENSG00000214078.13	CPNE1	chr20	-	35632162	35632234	35631944	35632025	35632310	35632385	31168	1745,1623	23,20	2154,1703	57,49	171	99	0.000110432921341	0.00547569632123	0.978,0.979	0.956,0.953	0.024
27890	ENSG00000249096.7	LINC02362	chr4	-	184378964	184379129	184376440	184376544	184382133	184382136	27890	4,1	0,0	0,1	1,1	264	99	0.000110960522437	0.00549639865655	1.0,1.0	0.0,0.273	0.863
8800	ENSG00000082898.19	XPO1	chr2	-	61534557	61534678	61533771	61533903	61537561	61537587	8800	17,33	112,150	11,6	150,119	220	99	0.00011196427657	0.00553641854423	0.064,0.09	0.032,0.022	0.05
35702	ENSG00000231925.14	TAPBP	chr6	-	33303954	33303989	33299693	33301771	33304296	33304638	35702	121,138	2,3	102,94	13,7	134	99	0.000111990201071	0.00553641854423	0.978,0.971	0.853,0.908	0.094
14926	ENSG00000168876.9	ANKRD49	chr11	+	94497901	94497964	94496603	94496951	94498070	94498214	14926	7,1	16,8	0,0	18,14	162	99	0.000113282396774	0.00559476098251	0.211,0.071	0.0,0.0	0.141
22647	ENSG00000160767.22	FAM189B	chr1	-	155253858	155253978	155252748	155253732	155254652	155254968	22647	97,101	16,13	126,95	49,34	219	99	0.000113885537842	0.0056189908992	0.733,0.778	0.538,0.558	0.208
14548	ENSG00000169682.18	SPNS1	chr16	+	28981900	28982056	28981454	28981615	28982355	28982545	14548	395,317	4,3	441,312	17,13	255	99	0.000114361961861	0.00563384859964	0.975,0.976	0.91,0.903	0.069
29947	ENSG00000056998.20	GYG2	chrX	+	2842997	2843090	2830060	2830195	2843212	2843354	29947	7,8	13,24	1,1	30,10	192	99	0.000114412338628	0.00563384859964	0.217,0.147	0.017,0.049	0.149
644	ENSG00000147099.21	HDAC8	chrX	-	72330657	72330768	72329537	72330076	72351732	72351838	644	11,6	25,23	2,2	44,31	210	99	0.00011556988489	0.0056852413029	0.172,0.11	0.021,0.03	0.115
33463	ENSG00000196262.15	PPIA	chr7	+	44798747	44798814	44796680	44796793	44799246	44799277	33463	244,218	6570,6808	258,199	11261,9853	166	99	0.000116309525656	0.00570476515278	0.022,0.019	0.013,0.012	0.008
72774	ENSG00000182400.15	TRAPPC6B	chr14	-	39154210	39154294	39151745	39151839	39158284	39158402	72774	307,287	25,22	240,180	36,42	183	99	0.000116289049094	0.00570476515278	0.869,0.876	0.783,0.699	0.132
76391	ENSG00000140563.16	MCTP2	chr15	+	94278153	94278263	94231571	94231664	94298200	94298730	76391	3,4	2,5	0,0	1,1	209	99	0.000116211952213	0.00570476515278	0.415,0.275	0.0,0.0	0.345
25439	ENSG00000143224.18	PPOX	chr1	+	161170906	161170949	161170619	161170769	161176848	161178013	25439	37,26	1,0	37,25	9,2	142	99	0.000117778959565	0.00577116901869	0.963,1.0	0.741,0.897	0.163
73507	ENSG00000119686.10	FLVCR2	chr14	+	75639351	75639462	75634909	75635013	75640954	75641060	73507	31,49	0,0	39,25	6,1	210	99	0.000118136171136	0.00578299721666	1.0,1.0	0.754,0.922	0.162
3632	ENSG00000196756.15	SNHG17	chr20	-	38430698	38430898	38426418	38426503	38431040	38431112	3632	11,5	35,24	1,1	30,33	299	99	0.000119041108723	0.00582158824647	0.094,0.065	0.011,0.01	0.069
22738	ENSG00000163491.17	NEK10	chr3	-	27290616	27290754	27287697	27287743	27291261	27291390	22738	30,41	4,7	5,6	0,0	237	99	0.000120329855726	0.00587310853006	0.758,0.71	1.0,1.0	-0.266
35899	ENSG00000109065.12	NAT9	chr17	-	74773865	74774055	74773575	74773688	74775621	74775707	35899	9,7	35,34	1,1	51,27	289	99	0.000120308748031	0.00587310853006	0.081,0.066	0.007,0.013	0.064
55853	ENSG00000033867.17	SLC4A7	chr3	-	27431297	27431669	27424036	27424152	27433915	27434104	55853	19,32	106,92	3,3	52,40	471	99	0.000120454654973	0.00587345837642	0.036,0.068	0.012,0.016	0.038
23541	ENSG00000142634.13	EFHD2	chr1	+	15427149	15427284	15425870	15426018	15428592	15430339	23541	173,150	0,0	156,133	4,7	234	99	0.000121223437358	0.0059051780007	1.0,1.0	0.943,0.889	0.084
19778	ENSG00000075711.21	DLG1	chr3	-	197161639	197161738	197149742	197149796	197194424	197194589	19778	98,129	34,41	67,48	46,41	198	99	0.000121653500847	0.00591622246679	0.59,0.611	0.421,0.369	0.206
35961	ENSG00000129187.15	DCTD	chr4	-	182916418	182916539	182915460	182915575	182916672	182916857	35961	61,55	19,14	63,36	45,31	220	99	0.000121687137718	0.00591622246679	0.591,0.639	0.387,0.343	0.25
17643	ENSG00000143248.13	RGS5	chr1	-	163248529	163248598	163168257	163168368	163306232	163306329	17643	4,2	0,0	1,2	1,2	168	99	0.000122044721014	0.00592207479587	1.0,1.0	0.371,0.371	0.629
24646	ENSG00000213057.5	C1orf220	chr1	+	178544874	178545028	178542751	178542885	178545212	178545500	24646	1,0	0,3	1,1	0,0	253	99	0.000121954702261	0.00592207479587	1.0,0.0	1.0,1.0	-0.5
61309	ENSG00000276291.7	FRG1HP	chr9	+	41007439	41007609	40994632	40994699	41008880	41009006	61309	40,42	3,10	33,26	0,1	269	99	0.000122861095567	0.00595137348341	0.831,0.607	1.0,0.905	-0.234
62777	ENSG00000148985.20	PGAP2	chr11	+	3823612	3823740	3822908	3822993	3823882	3824135	62777	5,6	4,4	0,1	7,2	227	99	0.000122886905157	0.00595137348341	0.353,0.395	0.0,0.179	0.284
75416	ENSG00000259345.7	ENSG00000259345	chr15	-	38974154	38974235	38886633	38886929	39071502	39071608	75416	28,16	6,3	4,6	0,0	180	99	0.000123049527421	0.0059534747613	0.72,0.746	1.0,1.0	-0.267
63540	ENSG00000110436.13	SLC1A2	chr11	-	35261669	35261862	35256952	35260965	35265526	35265758	63540	11,15	38,53	4,5	80,57	292	99	0.000123324484766	0.00596100178979	0.089,0.088	0.017,0.029	0.066
26645	ENSG00000203875.13	SNHG5	chr6	-	85677790	85677875	85677423	85677492	85678135	85678188	26645	5,1	1,0	3,4	7,10	184	99	0.000124605892158	0.00601711489491	0.729,1.0	0.187,0.177	0.683
8002	ENSG00000056736.10	IL17RB	chr3	+	53855293	53855341	53852870	53852997	53856843	53856986	8002	154,125	22,15	235,135	62,52	147	99	0.000125049825271	0.00602689461931	0.825,0.849	0.719,0.636	0.159
36057	ENSG00000169242.12	EFNA1	chr1	+	155133502	155133568	155131203	155131634	155133729	155133780	36057	1123,972	56,51	2508,1776	66,47	165	99	0.000124992619808	0.00602689461931	0.923,0.92	0.958,0.958	-0.036
60401	ENSG00000225873.4	C3orf86	chr3	-	44428930	44429097	44422852	44422937	44439796	44439946	60401	3,0	2,1	2,3	0,0	266	99	0.000127000631323	0.0061150130401	0.358,0.0	1.0,1.0	-0.821
35030	ENSG00000126214.22	KLC1	chr14	+	103687080	103687211	103679308	103679545	103700654	103700727	35030	38,32	3,6	40,28	25,15	230	99	0.000128224167347	0.00616797774548	0.845,0.697	0.408,0.446	0.344
9316	ENSG00000103051.21	COG4	chr16	-	70515867	70516040	70514334	70514509	70517625	70517740	9316	64,66	167,157	30,31	172,149	272	99	0.000128582441929	0.00617625670983	0.122,0.133	0.06,0.07	0.063
29869	ENSG00000164039.15	BDH2	chr4	-	103085348	103085462	103082870	103082929	103086479	103086540	29869	311,302	0,2	424,286	10,9	213	99	0.000128643667826	0.00617625670983	1.0,0.986	0.952,0.937	0.048
73196	ENSG00000072210.19	ALDH3A2	chr17	+	19673150	19673275	19671720	19671956	19675557	19675741	73196	31,42	99,76	38,23	203,142	224	99	0.000129402116121	0.00620670226709	0.122,0.196	0.076,0.067	0.087
62543	ENSG00000132600.18	PRMT7	chr16	+	68348341	68348431	68346144	68346280	68352247	68352315	62543	51,52	11,6	28,20	17,14	189	99	0.00012966151562	0.00621317575472	0.708,0.819	0.463,0.428	0.318
56510	ENSG00000107140.16	TESK1	chr9	+	35607326	35607409	35606836	35606983	35607581	35607672	56510	60,62	0,1	56,23	8,1	182	99	0.000130082467068	0.00622737072212	1.0,0.971	0.792,0.926	0.127
30361	ENSG00000084734.9	GCKR	chr2	+	27497561	27497630	27497243	27497399	27498254	27498323	30361	267,257	1,0	210,143	7,6	168	99	0.000130432589974	0.00623815100574	0.994,1.0	0.946,0.934	0.057
26833	ENSG00000122512.17	PMS2	chr7	-	5994072	5995389	5991972	5992057	5995533	5995633	26833	14,15	25,17	5,2	27,25	1416	99	0.000130829628901	0.00624732309644	0.038,0.058	0.013,0.006	0.038
58745	ENSG00000148362.11	PAXX	chr9	+	136992639	136992700	136992421	136992562	136992924	136992974	58745	8,24	0,0	8,7	4,1	160	99	0.000130874606134	0.00624732309644	1.0,1.0	0.553,0.812	0.317
56074	ENSG00000160588.10	MPZL3	chr11	-	118237049	118237260	118235423	118235589	118240210	118240341	56074	79,72	0,0	53,47	4,3	310	99	0.000131333348694	0.00626323346097	1.0,1.0	0.809,0.833	0.179
4553	ENSG00000105136.22	ZNF419	chr19	+	57490146	57490185	57487717	57487983	57491470	57491597	4553	7,1	6,6	0,0	2,2	138	99	0.000131532287129	0.00626673533267	0.456,0.107	0.0,0.0	0.282
72811	ENSG00000237441.10	RGL2	chr6	-	33297213	33297343	33297031	33297115	33298454	33298810	72811	24,7	100,70	28,35	75,51	229	99	0.000132341740442	0.00629929022117	0.094,0.041	0.139,0.229	-0.116
9829	ENSG00000092531.10	SNAP23	chr15	+	42521613	42521708	42515236	42515354	42528261	42528343	9829	9,11	132,120	0,1	138,112	194	99	0.000132814131773	0.00631575467958	0.034,0.045	0.0,0.005	0.037
66300	ENSG00000182985.18	CADM1	chr11	-	115190887	115190941	115178643	115178775	115198405	115198438	66300	1,6	9,6	0,0	19,12	153	99	0.000133233360608	0.00632966215844	0.067,0.393	0.0,0.0	0.23
77501	ENSG00000103495.15	MAZ	chr16	+	29809539	29809764	29808569	29808741	29810076	29811164	77501	405,367	222,168	377,318	310,265	324	99	0.000134424988288	0.0063802035078	0.358,0.4	0.271,0.268	0.109
69507	ENSG00000238105.7	GOLGA2P5	chr12	-	100157348	100157445	100157164	100157256	100157527	100157739	69507	25,13	3,3	8,7	0,0	196	99	0.000135232571534	0.0064124382994	0.808,0.686	1.0,1.0	-0.253
46035	ENSG00000162910.19	MRPL55	chr1	-	228108954	228109021	228108234	228108318	228109148	228109299	46035	69,92	3,3	96,66	14,13	166	99	0.000136599573249	0.0064649794236	0.932,0.948	0.804,0.752	0.162
71158	ENSG00000178761.15	FAM219B	chr15	-	74904981	74905039	74904663	74904712	74905153	74905231	71158	12,19	51,59	4,3	66,40	157	99	0.000136473497914	0.0064649794236	0.129,0.169	0.037,0.045	0.108
70520	ENSG00000196387.10	ZNF140	chr12	+	133100986	133101053	133083465	133083561	133105509	133107428	70520	9,13	19,16	28,15	10,5	166	99	0.000137111627117	0.00648306880074	0.22,0.326	0.625,0.641	-0.36
54591	ENSG00000091262.17	ABCC6	chr16	-	16162992	16163192	16161437	16161564	16165622	16165933	54591	256,277	21,26	129,91	24,32	299	99	0.000137533054035	0.00649684287703	0.801,0.779	0.64,0.485	0.228
72022	ENSG00000095637.23	SORBS1	chr10	-	95336520	95337294	95321962	95322021	95339132	95339327	72022	53,37	197,146	11,6	106,70	873	99	0.000138346198838	0.00652907755594	0.03,0.028	0.012,0.01	0.018
30370	ENSG00000162813.18	BPNT1	chr1	-	220066072	220066117	220062756	220062954	220067301	220067393	30370	8,14	171,150	4,1	215,170	144	99	0.000140843126204	0.00662812265268	0.031,0.06	0.013,0.004	0.037
47312	ENSG00000114942.14	EEF1B2	chr2	+	206160886	206161132	206160587	206160710	206161345	206161472	47312	185,133	2882,2806	155,124	7356,5156	345	99	0.000140674707031	0.00662812265268	0.018,0.013	0.006,0.007	0.009
77422	ENSG00000103522.17	IL21R	chr16	+	27442966	27443116	27437487	27437687	27444541	27444719	77422	33,25	5,3	58,25	0,1	249	99	0.000140822819843	0.00662812265268	0.724,0.768	1.0,0.909	-0.209
3613	ENSG00000196756.15	SNHG17	chr20	-	38422091	38422368	38421005	38421098	38426418	38426503	3613	56,38	3,4	46,39	17,13	376	99	0.000141710240584	0.00665638195917	0.831,0.714	0.416,0.441	0.344
43537	ENSG00000168575.10	SLC20A2	chr8	-	42463004	42463090	42444645	42444762	42472101	42472654	43537	0,1	4,0	1,1	0,0	185	99	0.000141624860967	0.00665638195917	0.0,1.0	1.0,1.0	-0.5
81923	ENSG00000101654.18	RNMT	chr18	+	13730626	13730755	13726672	13726729	13731475	13731821	81923	151,158	8,12	119,119	23,22	228	99	0.000142483620348	0.00668641884173	0.891,0.851	0.692,0.701	0.175
35368	ENSG00000135821.19	GLUL	chr1	-	182390496	182390852	182388571	182388750	182391174	182391346	35368	57,70	1,1	27,15	3,5	455	99	0.000144861940092	0.00678527348099	0.925,0.938	0.662,0.395	0.403
63597	ENSG00000140743.8	CDR2	chr16	-	22364901	22365014	22349700	22349849	22374230	22374619	63597	726,697	41,28	510,389	8,8	212	99	0.000144757291047	0.00678527348099	0.892,0.921	0.968,0.958	-0.056
53034	ENSG00000116793.16	PHTF1	chr1	-	113713278	113713438	113711939	113712113	113724758	113724893	53034	65,63	6,2	86,46	0,0	259	99	0.000145057227926	0.00678669349049	0.805,0.923	1.0,1.0	-0.136
57558	ENSG00000172775.17	PSME3IP1	chr16	-	57174168	57174286	57173727	57173869	57185544	57185822	57558	29,26	0,0	9,15	3,2	217	99	0.000145164099414	0.00678669349049	1.0,1.0	0.578,0.774	0.324
21654	ENSG00000248429.5	GASK1B-AS1	chr4	+	158176911	158177046	158171372	158171480	158179660	158179735	21654	4,20	5,6	0,1	4,2	234	99	0.000145469194994	0.00679459529957	0.253,0.585	0.0,0.175	0.332
26106	ENSG00000132677.13	RHBG	chr1	+	156382067	156382201	156369210	156369436	156382747	156382869	26106	339,279	14,10	242,216	33,17	233	99	0.000145826327042	0.00680491059396	0.911,0.922	0.757,0.844	0.116
13931	ENSG00000205269.6	TMEM170B	chr6	+	11565665	11565836	11537748	11538374	11575430	11583524	13931	128,140	0,0	101,61	5,3	270	99	0.000146823381192	0.0068386550805	1.0,1.0	0.881,0.882	0.119
79856	ENSG00000145725.21	PPIP5K2	chr5	+	103186319	103186439	103184671	103184744	103190841	103190982	79856	16,26	55,44	5,5	59,31	219	99	0.00014669834731	0.0068386550805	0.116,0.211	0.037,0.068	0.111
5464	ENSG00000105223.21	PLD3	chr19	+	40365717	40365930	40348684	40348768	40366418	40366464	5464	173,173	85,82	137,89	110,94	312	99	0.000147552354644	0.00686620374625	0.392,0.401	0.283,0.231	0.14
11992	ENSG00000137266.15	SLC22A23	chr6	-	3276680	3276976	3273355	3273412	3283851	3284120	11992	19,12	91,84	3,0	73,29	395	99	0.000147944087668	0.00687802257109	0.05,0.035	0.01,0.0	0.038
13371	ENSG00000158806.14	NPM2	chr8	+	22025215	22025306	22024136	22024257	22025435	22025521	13371	71,63	1,0	54,53	2,8	190	99	0.000148843646822	0.00691340663206	0.974,1.0	0.934,0.775	0.132
76512	ENSG00000186575.19	NF2	chr22	+	29683019	29683064	29681438	29681601	29694751	29694811	76512	1,9	27,25	20,12	13,16	144	99	0.000150329942174	0.00697595199135	0.025,0.198	0.514,0.34	-0.316
744	ENSG00000001497.18	LAS1L	chrX	-	65520701	65520817	65517986	65518465	65523559	65523707	744	11,11	80,75	1,1	60,41	215	99	0.000150481930988	0.00697652116635	0.06,0.063	0.008,0.011	0.052
15629	ENSG00000151292.19	CSNK1G3	chr5	+	123595038	123595134	123591318	123591414	123604723	123604830	15629	5,2	69,98	10,13	82,37	195	99	0.000151112131159	0.00699923916596	0.035,0.01	0.058,0.151	-0.082
76073	ENSG00000111237.19	VPS29	chr12	-	110499456	110499546	110496822	110497002	110502048	110502111	76073	15,18	0,3	3,4	3,5	189	99	0.000152020140587	0.00703477075037	1.0,0.759	0.344,0.295	0.56
71966	ENSG00000151338.21	MIPOL1	chr14	+	37227725	37227838	37197949	37198104	37240432	37240569	71966	10,5	1,0	3,1	1,3	212	99	0.000152502843322	0.00705057358325	0.824,1.0	0.583,0.135	0.553
38018	ENSG00000117155.17	SSX2IP	chr1	-	84671176	84671308	84670645	84670815	84690370	84690461	38018	19,31	4,2	13,16	0,0	231	99	0.000154322507721	0.00712810095561	0.671,0.869	1.0,1.0	-0.23
58925	ENSG00000266173.7	STRADA	chr17	-	63726637	63726695	63714005	63714108	63728333	63728384	58925	23,23	23,34	6,3	29,17	157	99	0.000154831759661	0.00713841605876	0.387,0.299	0.115,0.1	0.235
69383	ENSG00000139405.16	RITA1	chr12	+	113186184	113186316	113185720	113186021	113186682	113187048	69383	117,111	0,0	119,97	5,5	231	99	0.00015469876681	0.00713841605876	1.0,1.0	0.911,0.893	0.098
32143	ENSG00000198554.12	WDHD1	chr14	-	55026710	55026803	55013484	55013596	55027027	55027099	32143	51,63	3,6	54,46	0,0	192	99	0.00015529348342	0.00715309863528	0.898,0.844	1.0,1.0	-0.129
5249	ENSG00000142273.13	CBLC	chr19	+	44782369	44782491	44781206	44781363	44784263	44784401	5249	26,19	1,5	20,18	0,0	221	99	0.000155873391881	0.00717319293088	0.921,0.63	1.0,1.0	-0.224
50930	ENSG00000151276.24	MAGI1	chr3	-	65375744	65375948	65364852	65364946	65379260	65379554	50930	179,193	5,9	75,60	20,6	303	99	0.000156771283746	0.00720787013694	0.921,0.875	0.551,0.766	0.239
38252	ENSG00000130731.16	METTL26	chr16	-	635517	635774	635280	635340	636093	636260	38252	66,41	5,6	30,34	16,13	356	99	0.000157758264557	0.00724657581196	0.786,0.655	0.343,0.421	0.339
39251	ENSG00000138078.16	PREPL	chr2	-	44359496	44360038	44346267	44346390	44361379	44361494	39251	201,195	54,63	158,107	12,15	641	99	0.000158918122965	0.00729314411559	0.365,0.323	0.67,0.524	-0.253
61135	ENSG00000026103.25	FAS	chr10	+	89010752	89010815	89008888	89010600	89011998	89012081	61135	8,23	0,0	21,23	5,2	162	99	0.000159486083894	0.00731248820469	1.0,1.0	0.72,0.875	0.203
8905	ENSG00000151502.11	VPS26B	chr11	+	134236341	134236746	134234961	134235053	134239990	134240155	8905	11,14	70,78	0,0	71,49	504	99	0.000159975666733	0.00732820643637	0.03,0.034	0.0,0.0	0.032
8224	ENSG00000135083.17	CCNJL	chr5	-	160276268	160276412	160259468	160259771	160280524	160280738	8224	0,1	8,4	1,6	1,3	243	99	0.00016145162386	0.00738903852516	0.0,0.092	0.289,0.449	-0.323
33063	ENSG00000130669.17	PAK4	chr19	+	39168624	39168840	39168229	39168312	39169531	39169757	33063	6,5	11,6	2,0	17,15	315	99	0.000161730766347	0.00739503561765	0.146,0.208	0.036,0.0	0.159
33179	ENSG00000049089.15	COL9A2	chr1	-	40315237	40315465	40314351	40314387	40315589	40315664	33179	175,193	6,11	164,166	23,22	327	99	0.000161971684607	0.00739927555728	0.898,0.842	0.683,0.696	0.18
9627	ENSG00000101266.19	CSNK2A1	chr20	-	527932	528049	508450	508660	543671	543712	9627	69,68	441,501	156,80	506,388	216	99	0.000163185438228	0.0074411069554	0.067,0.059	0.124,0.086	-0.042
30106	ENSG00000155366.17	RHOC	chr1	-	112704281	112704440	112703643	112703806	112705052	112705168	30106	7,10	16,3	0,2	7,18	258	99	0.000163157174283	0.0074411069554	0.144,0.561	0.0,0.041	0.332
7583	ENSG00000221838.10	AP4M1	chr7	+	100102245	100102393	100101879	100101968	100102674	100102781	7583	1,8	7,9	0,0	12,5	247	99	0.000163524308051	0.00744296465387	0.054,0.263	0.0,0.0	0.159
9075	ENSG00000026297.17	RNASET2	chr6	-	166934090	166934136	166931043	166931118	166938894	166939008	9075	1373,1192	36,34	2406,1878	27,26	145	99	0.000163477610376	0.00744296465387	0.963,0.96	0.984,0.98	-0.02
46234	ENSG00000160783.19	PMF1	chr1	+	156225556	156225668	156213005	156213176	156232319	156232425	46234	11,19	144,130	6,6	220,172	211	99	0.00016402761153	0.00745907347113	0.035,0.064	0.013,0.016	0.035
43278	ENSG00000168172.9	HOOK3	chr8	+	43000270	43000276	42997589	42997637	43002106	43002141	43278	14,13	8,14	8,2	27,18	105	99	0.000164745783401	0.00748384455341	0.623,0.467	0.218,0.095	0.389
49342	ENSG00000169814.17	BTD	chr3	+	15632590	15632866	15601763	15602310	15635423	15635429	49342	12,8	0,0	9,7	3,1	375	99	0.000164872103678	0.00748384455341	1.0,1.0	0.442,0.649	0.455
83333	ENSG00000064490.14	RFXANK	chr19	+	19197185	19197251	19196962	19197046	19197520	19197621	83333	150,169	1,4	174,109	7,15	165	99	0.000165389855188	0.00750052757438	0.989,0.962	0.937,0.813	0.101
32930	ENSG00000160124.9	MIX23	chr3	-	122371674	122371800	122362967	122363027	122383173	122383231	32930	263,299	13,16	493,436	9,5	225	99	0.00016592991444	0.00751819106888	0.899,0.892	0.96,0.975	-0.072
39687	ENSG00000168890.14	TMEM150A	chr2	-	85601305	85601482	85601020	85601107	85601883	85602064	39687	246,182	2,0	188,158	5,8	276	99	0.000166225014973	0.00752473365604	0.978,1.0	0.931,0.876	0.086
79015	ENSG00000197912.16	SPG7	chr16	+	89540943	89542279	89532462	89532636	89544647	89544772	79015	419,362	124,117	192,136	97,83	1435	99	0.000167949623793	0.00759591726957	0.189,0.176	0.12,0.102	0.072
7186	ENSG00000125124.14	BBS2	chr16	-	56501944	56502079	56501352	56501497	56502316	56502456	7186	14,9	109,108	1,1	87,72	234	99	0.000168441441363	0.00760438481799	0.052,0.034	0.005,0.006	0.037
31360	ENSG00000115392.13	FANCL	chr2	-	58229813	58229874	58221941	58222042	58241217	58241325	31360	1,2	0,1	0,0	3,2	160	99	0.000168292927606	0.00760438481799	1.0,0.553	0.0,0.0	0.776
78001	ENSG00000140859.16	KIFC3	chr16	-	57760281	57760416	57759727	57759836	57760725	57760955	78001	215,139	1,0	150,125	3,8	234	99	0.000168665013169	0.00760759961386	0.989,1.0	0.955,0.869	0.083
26075	ENSG00000132677.13	RHBG	chr1	+	156377300	156377487	156374606	156374729	156378251	156378399	26075	301,265	2,0	136,79	5,4	286	99	0.000169007692951	0.00761617609814	0.981,1.0	0.904,0.872	0.102
8552	ENSG00000167107.13	ACSF2	chr17	+	50464525	50464599	50464217	50464294	50471027	50471135	8552	35,19	198,234	61,43	240,150	173	99	0.000169984827575	0.00764640759067	0.092,0.044	0.127,0.141	-0.066
34838	ENSG00000015532.10	XYLT2	chr17	+	50357117	50357252	50356510	50356773	50358206	50358317	34838	84,46	5,4	42,52	0,0	234	99	0.000169982366027	0.00764640759067	0.877,0.83	1.0,1.0	-0.147
48204	ENSG00000150540.14	HNMT	chr2	+	137967096	137967386	137964478	137964628	138000917	138001025	48204	1418,1315	52,88	2624,2257	72,59	389	99	0.000170748289194	0.00767383692866	0.874,0.792	0.903,0.907	-0.072
19583	ENSG00000163945.19	UVSSA	chr4	+	1380640	1380747	1380046	1380230	1380879	1380988	19583	2,8	6,7	1,0	12,5	206	99	0.000171695764788	0.00770947952485	0.138,0.355	0.039,0.0	0.227
68328	ENSG00000123358.20	NR4A1	chr12	+	52052495	52052645	52043838	52043911	52054326	52054673	68328	10,7	2,0	2,3	4,4	249	99	0.000172032679204	0.00771766730039	0.665,1.0	0.166,0.23	0.635
61150	ENSG00000288663.1	ENSG00000288663	chr12	+	53296218	53296275	53295491	53295639	53297849	53297924	61150	429,436	173,157	894,659	172,180	156	99	0.000172642983905	0.00773809410176	0.611,0.638	0.767,0.699	-0.108
3369	ENSG00000235621.10	LINC00494	chr20	+	48360605	48360883	48359891	48360150	48364888	48365197	3369	5,3	2,1	1,4	0,0	377	99	0.00017352514064	0.00777065811417	0.396,0.441	1.0,1.0	-0.582
50574	ENSG00000127314.18	RAP1B	chr12	+	68641037	68641153	68610907	68611052	68648698	68648781	50574	4,3	8,8	0,0	16,21	215	99	0.00017373394968	0.00777303749236	0.187,0.147	0.0,0.0	0.167
40239	ENSG00000123595.8	RAB9A	chrX	+	13703734	13703902	13689160	13689288	13708720	13708817	40239	24,20	17,14	38,35	6,7	267	99	0.000174373150806	0.00779465156034	0.344,0.346	0.701,0.65	-0.331
60674	ENSG00000107758.16	PPP3CB	chr10	-	73439871	73439901	73436432	73438420	73444724	73444822	60674	61,73	22,17	30,35	62,24	129	99	0.000175774115678	0.00785024809474	0.68,0.767	0.271,0.528	0.324
55064	ENSG00000254166.4	CASC19	chr8	-	127202041	127202152	127197474	127197564	127218809	127218931	55064	4,5	0,1	2,3	4,2	210	99	0.000176365358491	0.00786961457982	1.0,0.702	0.191,0.414	0.548
40129	ENSG00000172594.13	SMPDL3A	chr6	+	122801309	122801406	122796823	122796968	122803663	122803833	40129	195,210	25,29	267,209	11,13	196	99	0.000176660753061	0.0078757571974	0.798,0.785	0.925,0.89	-0.116
60025	ENSG00000215126.11	CBWD6	chr9	-	41170283	41170423	41166783	41166830	41172711	41172749	60025	1,3	1,0	0,1	2,3	239	99	0.000178179497393	0.00793637866577	0.293,1.0	0.0,0.121	0.586
12266	ENSG00000169045.17	HNRNPH1	chr5	-	179615545	179615595	179614177	179614959	179616125	179616218	12266	1495,1453	32,35	1222,966	52,48	149	99	0.000178408996589	0.00793951836781	0.969,0.965	0.94,0.93	0.032
56995	ENSG00000111229.16	ARPC3	chr12	-	110436556	110436683	110436109	110436204	110437083	110437152	56995	2077,2005	5,2	927,782	14,9	226	99	0.00017875183518	0.00794769179196	0.995,0.998	0.967,0.974	0.026
12629	ENSG00000100294.13	MCAT	chr22	-	43137080	43137298	43132208	43133486	43141161	43141249	12629	54,62	0,1	75,79	6,5	317	99	0.000179609614569	0.00797872568064	1.0,0.951	0.796,0.831	0.162
74535	ENSG00000224078.15	SNHG14	chr15	+	24998365	24998486	24981774	24982437	24998969	24999078	74535	108,123	3,7	85,61	14,11	220	99	0.000179878881944	0.00798358440386	0.942,0.888	0.732,0.714	0.192
3915	ENSG00000171456.21	ASXL1	chr20	+	32371777	32371874	32369014	32369123	32372163	32372223	3915	29,49	12,12	26,14	25,20	196	99	0.000180227816011	0.00799196721247	0.55,0.673	0.344,0.261	0.309
58008	ENSG00000134278.16	SPIRE1	chr18	-	12459754	12459928	12454345	12454483	12463350	12463493	58008	5,4	17,16	22,9	10,0	273	99	0.00018084220279	0.00801209585404	0.096,0.083	0.444,1.0	-0.632
75305	ENSG00000197535.16	MYO5A	chr15	-	52343116	52343197	52336462	52340394	52346360	52346461	75305	2,3	6,2	8,2	0,1	180	99	0.000181163608423	0.00801921997533	0.155,0.452	1.0,0.524	-0.459
56831	ENSG00000213096.11	ZNF254	chr19	+	24103746	24103867	24091900	24092015	24105939	24106066	56831	2,2	4,3	6,1	1,0	220	99	0.000181792037721	0.00803990986311	0.184,0.231	0.73,1.0	-0.657
47345	ENSG00000157214.14	STEAP2	chr7	+	90216494	90216603	90211872	90212045	90225049	90225346	47345	21,15	5,1	5,5	0,0	208	99	0.000182029005463	0.00804326572723	0.667,0.877	1.0,1.0	-0.228
23307	ENSG00000197756.10	RPL37A	chr2	+	216519331	216519390	216499948	216500031	216520713	216520774	23307	1,0	8,7	10,9	25,15	158	99	0.000185743309671	0.0082001319144	0.073,0.0	0.2,0.273	-0.2
338	ENSG00000076770.16	MBNL3	chrX	-	132381358	132381432	132379194	132379677	132382177	132382272	338	99,84	132,122	70,60	203,142	173	99	0.000186233875466	0.00821452618012	0.3,0.283	0.165,0.195	0.111
5260	ENSG00000186567.14	CEACAM19	chr19	+	44671303	44671436	44666957	44667321	44671745	44671986	5260	0,5	4,1	6,7	1,0	232	99	0.000187126687369	0.00824662191264	0.0,0.681	0.719,1.0	-0.519
3370	ENSG00000235621.10	LINC00494	chr20	+	48360605	48360975	48359891	48360150	48364888	48365313	3370	6,4	2,1	2,7	0,0	469	99	0.000187517173571	0.00825654320421	0.388,0.458	1.0,1.0	-0.577
20706	ENSG00000204219.11	TCEA3	chr1	-	23419076	23419139	23417903	23418009	23424564	23424618	20706	188,216	15,11	365,309	53,49	162	99	0.000188284056818	0.00828300549866	0.885,0.923	0.808,0.794	0.103
65264	ENSG00000166435.16	XRRA1	chr11	-	74851087	74851203	74848114	74848462	74862980	74863021	65264	12,14	1,0	6,10	5,2	215	99	0.00018938978458	0.00832431455446	0.847,1.0	0.356,0.697	0.397
5300	ENSG00000167637.18	ZNF283	chr19	+	43833504	43833626	43831317	43831381	43835504	43835592	5300	11,11	5,15	1,0	5,2	221	99	0.000193066808915	0.00844134749206	0.496,0.247	0.082,0.0	0.331
6615	ENSG00000181392.17	SYNE4	chr19	-	36007124	36007268	36005332	36005437	36008553	36008793	6615	33,34	3,1	23,34	7,13	243	99	0.000192887384572	0.00844134749206	0.818,0.933	0.572,0.516	0.331
14441	ENSG00000131844.17	MCCC2	chr5	+	71592925	71592992	71586786	71586850	71596279	71596364	14441	103,121	0,2	153,107	13,3	166	99	0.000192402922852	0.00844134749206	1.0,0.973	0.875,0.955	0.071
33178	ENSG00000049089.15	COL9A2	chr1	-	40315237	40315409	40314351	40314387	40315589	40315664	33178	160,183	6,11	159,152	23,22	271	99	0.000192967970838	0.00844134749206	0.907,0.859	0.716,0.716	0.167
60249	ENSG00000242086.8	MUC20-OT1	chr3	+	195686603	195686718	195683749	195683865	195688532	195688797	60249	3,5	6,7	0,1	14,11	214	99	0.000192604785723	0.00844134749206	0.188,0.248	0.0,0.04	0.198
74016	ENSG00000157426.14	AASDH	chr4	-	56384069	56384341	56381758	56382597	56387361	56387459	74016	103,112	0,0	88,54	4,3	371	99	0.00019282093424	0.00844134749206	1.0,1.0	0.854,0.828	0.159
31169	ENSG00000214078.13	CPNE1	chr20	-	35632162	35632248	35631944	35632025	35632310	35632385	31169	578,624	23,20	778,625	57,49	185	99	0.000193380786138	0.00844635477853	0.931,0.943	0.88,0.872	0.061
57712	ENSG00000136870.11	ZNF189	chr9	+	101407411	101407532	101399925	101400010	101407928	101409937	57712	10,13	127,118	2,1	127,89	220	99	0.000193519654456	0.00844635477853	0.034,0.047	0.007,0.005	0.035
22981	ENSG00000055917.16	PUM2	chr2	-	20278582	20278819	20263192	20263460	20282946	20283231	22981	528,484	46,28	368,273	56,39	336	99	0.000194023620977	0.00845357191885	0.772,0.836	0.659,0.673	0.138
76626	ENSG00000172366.20	MCRIP2	chr16	+	646471	646608	642119	642249	647416	647544	76626	27,28	6,10	6,15	12,16	236	99	0.000193920607719	0.00845357191885	0.654,0.54	0.173,0.282	0.369
8118	ENSG00000133612.19	AGAP3	chr7	+	151120519	151120745	151119986	151120145	151122724	151122878	8118	81,55	23,14	17,8	13,12	325	99	0.000194496309031	0.00846677873254	0.518,0.545	0.285,0.169	0.305
61469	ENSG00000023839.12	ABCC2	chr10	+	99849723	99849905	99846960	99847127	99850601	99850796	61469	59,46	699,710	9,14	415,315	281	99	0.000195261558238	0.0084926871641	0.029,0.022	0.008,0.015	0.014
43906	ENSG00000186522.15	SEPTIN10	chr2	-	109545384	109545542	109544236	109544324	109546049	109546237	43906	122,150	102,113	118,104	193,129	257	99	0.000195916555289	0.00851375937523	0.315,0.338	0.191,0.237	0.113
36731	ENSG00000134716.11	CYP2J2	chr1	-	59904365	59904516	59900964	59901103	59904870	59905058	36731	27,36	36,48	9,5	43,18	250	99	0.000196458637667	0.00852989238031	0.229,0.229	0.077,0.099	0.141
82112	ENSG00000078142.14	PIK3C3	chr18	+	42057882	42058051	42049530	42049605	42064739	42064830	82112	171,171	4,6	279,243	0,0	268	99	0.000196997992151	0.00854587901485	0.94,0.913	1.0,1.0	-0.074
4367	ENSG00000089063.15	TMEM230	chr20	-	5111499	5111605	5109331	5109445	5112742	5113042	4367	14,11	21,13	3,5	40,15	205	99	0.000197329322329	0.00855282152188	0.244,0.29	0.035,0.139	0.18
81634	ENSG00000141568.21	FOXK2	chr17	+	82595781	82596191	82587062	82587272	82601302	82602392	81634	45,27	265,227	17,7	222,188	509	99	0.00019885165911	0.00861132887339	0.032,0.023	0.015,0.007	0.017
72230	ENSG00000092199.19	HNRNPC	chr14	-	21262600	21262768	21233952	21234229	21263310	21263336	72230	181,172	795,820	154,119	1114,928	267	99	0.00020119190984	0.00870512413364	0.078,0.072	0.049,0.045	0.028
55885	ENSG00000101464.11	PIGU	chr20	-	34585436	34585480	34575103	34575246	34588452	34588607	55885	5,1	5,7	0,0	7,9	143	99	0.000201383711108	0.00870587885657	0.409,0.09	0.0,0.0	0.249
25000	ENSG00000188313.13	PLSCR1	chr3	-	146536539	146536565	146533469	146533550	146544466	146544530	25000	168,174	6,9	190,107	25,15	125	99	0.000202639627499	0.00875259449883	0.957,0.939	0.858,0.85	0.094
37032	ENSG00000176261.16	ZBTB8OS	chr1	-	32634701	32634792	32633950	32634110	32650432	32650525	37032	134,155	3,10	143,110	24,13	190	99	0.000202868862448	0.00875492236032	0.959,0.89	0.756,0.815	0.139
47344	ENSG00000157214.14	STEAP2	chr7	+	90216490	90216603	90211739	90212045	90225049	90225574	47344	25,18	5,1	5,11	0,0	212	99	0.000203989128595	0.00879566595844	0.7,0.894	1.0,1.0	-0.203
6297	ENSG00000120899.18	PTK2B	chr8	+	27313204	27313287	27311481	27311709	27322401	27322499	6297	13,8	2,3	3,4	0,0	182	99	0.000204242231556	0.00879898090062	0.78,0.592	1.0,1.0	-0.314
53457	ENSG00000174718.12	RESF1	chr12	+	31980877	31985957	31970188	31970356	31987238	31987322	53457	1062,1165	0,1	883,585	7,1	5179	99	0.000204533524543	0.00880393397755	1.0,0.957	0.707,0.918	0.166
37337	ENSG00000168522.13	FNTA	chr8	+	43059091	43059177	43056322	43056546	43064100	43064215	37337	130,90	12,3	189,168	3,1	185	99	0.000206117832941	0.00886448709438	0.853,0.941	0.971,0.989	-0.083
6603	ENSG00000181392.17	SYNE4	chr19	-	36006422	36006671	36005332	36005437	36008216	36008367	6603	164,103	0,0	214,173	8,3	348	99	0.000206464112146	0.00887173802372	1.0,1.0	0.884,0.943	0.087
29237	ENSG00000116977.19	LGALS8	chr1	+	236525423	236525545	236523969	236524061	236525967	236526115	29237	44,26	423,371	15,11	412,309	221	99	0.00020692497134	0.00888389573859	0.045,0.03	0.016,0.016	0.021
21854	ENSG00000166169.17	POLL	chr10	-	101587121	101587200	101585861	101586156	101588203	101588248	21854	3,0	3,1	6,1	1,0	178	99	0.00020900402402	0.00896544666954	0.357,0.0	0.769,1.0	-0.706
32296	ENSG00000244055.2	ENSG00000244055	chr7	+	92462957	92463026	92461318	92461410	92491242	92491610	32296	5,8	9,7	5,3	0,1	168	99	0.000210093687271	0.0090044531323	0.247,0.402	1.0,0.639	-0.495
35639	ENSG00000068745.15	IP6K2	chr3	-	48715314	48715527	48693520	48695421	48717156	48717188	35639	75,61	195,182	84,69	123,98	312	99	0.000211589611687	0.00906078979515	0.109,0.096	0.178,0.183	-0.078
40639	ENSG00000231551.8	PDE4DIPP6	chr1	+	148420819	148420937	148420371	148420607	148424062	148424189	40639	6,1	1,0	2,2	4,2	217	99	0.000215597315945	0.00921717900136	0.732,1.0	0.186,0.313	0.617
77219	ENSG00000140694.18	PARN	chr16	-	14591912	14592033	14584748	14584791	14593300	14593378	77219	11,12	3,2	2,2	0,0	220	99	0.000215610844437	0.00921717900136	0.623,0.73	1.0,1.0	-0.324
27720	ENSG00000164008.17	C1orf50	chr1	+	42773545	42773649	42767508	42767624	42774736	42774868	27720	37,35	0,0	47,27	6,1	203	99	0.000216642063611	0.00925334035771	1.0,1.0	0.793,0.929	0.139
3961	ENSG00000214491.9	SEC14L6	chr22	-	30525349	30525519	30522798	30525109	30525610	30525750	3961	6,4	10,13	1,0	18,13	269	99	0.000217595133957	0.00927908123546	0.181,0.102	0.02,0.0	0.131
15676	ENSG00000198369.10	SPRED2	chr2	-	65334114	65334265	65331986	65332051	65334604	65334773	15676	54,44	276,232	16,12	173,164	250	99	0.000217616393157	0.00927908123546	0.072,0.07	0.035,0.028	0.04
58300	ENSG00000167110.19	GOLGA2	chr9	-	128272784	128272865	128268419	128268524	128273849	128273972	58300	76,92	146,140	37,32	121,116	180	99	0.000217915410003	0.0092839030178	0.223,0.265	0.144,0.132	0.106
23788	ENSG00000133422.14	MORC2	chr22	-	30963224	30963334	30958640	30958694	30967821	30968774	23788	19,10	93,95	1,4	76,65	209	99	0.000218751911974	0.00931159566647	0.088,0.047	0.006,0.028	0.051
27718	ENSG00000164008.17	C1orf50	chr1	+	42773540	42773649	42767508	42767624	42774736	42774868	27718	36,34	0,0	48,27	6,1	208	99	0.000219188200686	0.00932221980277	1.0,1.0	0.792,0.928	0.14
15069	ENSG00000164294.14	GPX8	chr5	+	55161119	55161255	55160181	55160243	55164054	55164433	15069	3,9	1,3	10,4	0,0	235	99	0.000220731762851	0.00937987885184	0.558,0.558	1.0,1.0	-0.442
37490	ENSG00000168067.12	MAP4K2	chr11	-	64801578	64801621	64801110	64801183	64801709	64801757	37490	52,54	2,0	19,28	6,3	142	99	0.000221575340931	0.0094077196837	0.948,1.0	0.688,0.867	0.197
15278	ENSG00000171045.16	TSNARE1	chr8	-	142343965	142344472	142331753	142331831	142354636	142354724	15278	45,32	4,1	41,34	0,0	606	99	0.000222236672135	0.00942778188307	0.648,0.839	1.0,1.0	-0.256
7343	ENSG00000156795.8	NTAQ1	chr8	+	123435441	123435542	123429982	123430033	123436452	123436601	7343	16,20	68,66	1,6	52,48	200	99	0.000223007650092	0.00945245753544	0.104,0.13	0.009,0.058	0.083
6380	ENSG00000123352.18	SPATS2	chr12	+	49371227	49371290	49366904	49367587	49460769	49461037	6380	21,35	16,9	7,8	22,15	162	99	0.000224531093114	0.00950090000871	0.445,0.704	0.163,0.246	0.37
53239	ENSG00000100522.10	GNPNAT1	chr14	-	52787832	52787871	52784496	52784664	52791427	52791668	53239	3,4	169,164	18,15	229,190	138	99	0.000224457025004	0.00950090000871	0.013,0.017	0.053,0.054	-0.038
11231	ENSG00000135315.12	CEP162	chr6	-	84219102	84219214	84215775	84215922	84221056	84221171	11231	0,3	2,1	3,3	0,0	211	99	0.000225680310749	0.00954144250297	0.0,0.585	1.0,1.0	-0.708
23842	ENSG00000249846.7	LINC02021	chr3	+	130116836	130117092	130112527	130112744	130119056	130119174	23842	5,12	2,2	12,4	0,0	355	99	0.000226711908745	0.00957694781349	0.411,0.626	1.0,1.0	-0.482
14350	ENSG00000258644.6	SYNJ2BP-COX16	chr14	-	70375675	70375771	70342657	70342729	70416899	70416984	14350	8,8	0,0	6,3	3,1	195	99	0.000227400035125	0.00958169717622	1.0,1.0	0.504,0.604	0.446
44256	ENSG00000163702.21	IL17RC	chr3	+	9917518	9917633	9917124	9917420	9917712	9917734	44256	0,1	88,64	6,7	54,48	214	99	0.000227353549011	0.00958169717622	0.0,0.007	0.049,0.063	-0.052
61594	ENSG00000269609.6	C10orf95-AS1	chr10	+	102451398	102452187	102450186	102450330	102455336	102456265	61594	77,80	11,26	76,36	48,33	888	99	0.000227129136628	0.00958169717622	0.438,0.255	0.15,0.108	0.218
69151	ENSG00000186908.15	ZDHHC17	chr12	+	76797433	76797537	76764114	76764329	76805316	76805439	69151	133,166	11,12	122,79	2,1	203	99	0.00022828794529	0.00959481935713	0.855,0.871	0.967,0.975	-0.108
77310	ENSG00000005187.12	ACSM3	chr16	+	20779796	20779907	20777372	20777580	20780713	20780857	77310	92,79	186,201	59,20	189,155	210	99	0.000228156313646	0.00959481935713	0.189,0.156	0.128,0.057	0.08
83019	ENSG00000130158.14	DOCK6	chr19	-	11229297	11229390	11228939	11229035	11233202	11233366	83019	50,27	6,4	8,8	5,8	192	99	0.000228272758411	0.00959481935713	0.811,0.777	0.452,0.34	0.398
40288	ENSG00000188833.10	ENTPD8	chr9	-	137435718	137435829	137435203	137435338	137436012	137436276	40288	7,2	1,0	2,2	2,2	210	99	0.00022889467532	0.00961149126885	0.767,1.0	0.32,0.32	0.563
48071	ENSG00000187391.22	MAGI2	chr7	-	78065573	78065662	78017080	78019976	78078946	78079085	48071	4,10	22,11	0,0	4,4	188	99	0.000229069608258	0.00961149126885	0.087,0.324	0.0,0.0	0.206
2221	ENSG00000128271.22	ADORA2A	chr22	+	24432620	24432726	24423770	24423957	24433130	24433192	2221	0,1	9,10	3,3	2,3	205	99	0.000230099353586	0.00964659179169	0.0,0.046	0.42,0.326	-0.35
726	ENSG00000131080.15	EDA2R	chrX	-	66605047	66605226	66602632	66602797	66615933	66616020	726	25,40	0,1	39,17	3,5	278	99	0.000230756990841	0.00965794409864	1.0,0.934	0.822,0.548	0.282
37128	ENSG00000171729.14	TMEM51	chr1	+	15210489	15210562	15153746	15153954	15214894	15215431	37128	5,3	0,0	18,12	1,5	172	99	0.000230749969115	0.00965794409864	1.0,1.0	0.912,0.58	0.254
46024	ENSG00000162910.19	MRPL55	chr1	-	228107976	228108137	228107667	228107869	228108234	228108318	46024	61,46	35,35	29,28	55,37	260	99	0.000231918461621	0.00967411922072	0.399,0.334	0.167,0.224	0.171
49894	ENSG00000204842.18	ATXN2	chr12	-	111479069	111479102	111470557	111470742	111485264	111485331	49894	9,6	52,30	0,1	26,20	132	99	0.00023181876184	0.00967411922072	0.115,0.13	0.0,0.036	0.104
61507	ENSG00000186862.20	PDZD7	chr10	-	101015635	101015811	101012166	101012258	101018098	101018296	61507	10,3	1,0	3,2	3,1	275	99	0.00023158281845	0.00967411922072	0.783,1.0	0.265,0.419	0.549
78013	ENSG00000140859.16	KIFC3	chr16	-	57788574	57788713	57785463	57785666	57794998	57795141	78013	37,36	1,6	28,33	0,0	238	99	0.000231482973623	0.00967411922072	0.939,0.714	1.0,1.0	-0.173
21583	ENSG00000126217.21	MCF2L	chr13	+	113091120	113091195	113089609	113089728	113094513	113094635	21583	21,24	116,85	4,5	72,64	174	99	0.000233946736612	0.00975057972101	0.093,0.138	0.031,0.043	0.079
34542	ENSG00000165102.15	HGSNAT	chr8	+	43196429	43196540	43193756	43193843	43196947	43197025	34542	10,7	42,62	1,1	54,33	210	99	0.00023495055012	0.00977609659837	0.101,0.051	0.009,0.014	0.065
71220	ENSG00000188002.12	PDCD6P1	chr5	-	1632643	1632744	1602690	1602735	1632844	1632906	71220	8,15	1,4	5,2	0,0	200	99	0.000234947162842	0.00977609659837	0.798,0.65	1.0,1.0	-0.276
14984	ENSG00000173905.9	GOLIM4	chr3	-	168040785	168040869	168036835	168036994	168041391	168041474	14984	292,310	31,40	237,144	10,7	183	99	0.000235431501334	0.00978795195096	0.836,0.807	0.928,0.918	-0.102
66739	ENSG00000149554.14	CHEK1	chr11	+	125627606	125627830	125626315	125626833	125629231	125629296	66739	145,174	1,1	208,170	6,9	323	99	0.00023595693831	0.00980163551311	0.978,0.982	0.914,0.853	0.097
3425	ENSG00000064601.21	CTSA	chr20	+	45892978	45893145	45892724	45892880	45893219	45893311	3425	38,50	685,712	17,7	541,364	266	99	0.000237398681339	0.00982881721222	0.02,0.025	0.012,0.007	0.013
13347	ENSG00000147140.17	NONO	chrX	+	71284983	71285097	71283589	71283721	71290628	71290791	13347	70,75	123,129	63,53	219,170	213	99	0.000237315411493	0.00982881721222	0.209,0.213	0.118,0.127	0.088
19640	ENSG00000215375.7	MYL5	chr4	+	677921	678029	676072	676209	678657	678765	19640	15,17	10,12	5,2	18,7	207	99	0.00023728496417	0.00982881721222	0.418,0.404	0.117,0.12	0.293
25128	ENSG00000143157.12	POGK	chr1	+	166847493	166847592	166840954	166841088	166848937	166849208	25128	23,29	7,4	44,33	2,0	198	99	0.000236867651825	0.00982881721222	0.622,0.784	0.917,1.0	-0.255
80981	ENSG00000198231.14	DDX42	chr17	+	63799588	63799625	63798037	63798099	63800467	63800617	80981	280,240	12,10	236,142	27,17	136	99	0.000238085371789	0.00984908094349	0.944,0.946	0.864,0.859	0.084
48499	ENSG00000155621.15	C9orf85	chr9	+	71941804	71941934	71918424	71918555	71947005	71947112	48499	5,6	0,1	6,3	4,3	229	99	0.00023908135738	0.00988209541005	1.0,0.722	0.393,0.302	0.513
37044	ENSG00000176261.16	ZBTB8OS	chr1	-	32634767	32634792	32633950	32634110	32650432	32650535	37044	135,134	3,10	132,107	24,13	124	99	0.000239561728162	0.00989376066903	0.973,0.915	0.815,0.868	0.103
30327	ENSG00000133895.18	MEN1	chr11	-	64805887	64806013	64805634	64805770	64806231	64806368	30327	27,28	72,60	8,8	66,48	225	99	0.00024446877274	0.0100880746212	0.142,0.17	0.051,0.068	0.097
33925	ENSG00000206530.11	CFAP44	chr3	-	113293951	113294038	113290852	113291748	113294686	113294821	33925	4,5	7,2	7,4	0,1	186	99	0.000245439724521	0.0101197777746	0.233,0.571	1.0,0.68	-0.438
42020	ENSG00000187605.16	TET3	chr2	+	74046277	74048411	74003109	74003166	74073548	74073639	42020	491,458	3,5	225,203	0,0	2233	99	0.000246007788413	0.0101348307618	0.879,0.802	1.0,1.0	-0.159
74865	ENSG00000059145.19	UNKL	chr16	-	1413845	1414009	1403167	1403344	1414614	1414697	74865	20,10	1,4	15,16	0,0	263	99	0.000249040001942	0.0102512912918	0.883,0.485	1.0,1.0	-0.316
30281	ENSG00000076864.21	RAP1GAP	chr1	-	21603834	21603912	21602803	21602913	21606065	21606197	30281	5,17	71,54	2,3	70,71	177	99	0.000249250105548	0.0102514884844	0.038,0.15	0.016,0.023	0.074
2592	ENSG00000160194.18	NDUFV3	chr21	+	42896926	42897047	42893267	42893381	42908863	42913304	2592	529,489	34,27	593,499	17,10	220	99	0.000250222826832	0.0102745690514	0.875,0.891	0.94,0.957	-0.065
46373	ENSG00000153406.14	NMRAL1	chr16	-	4471313	4471449	4469226	4469465	4474092	4474166	46373	21,8	39,58	7,3	81,56	235	99	0.000250145079451	0.0102745690514	0.185,0.055	0.035,0.022	0.091
23896	ENSG00000160323.19	ADAMTS13	chr9	+	133457909	133458094	133456542	133456719	133458973	133459386	23896	49,37	0,0	36,25	7,0	284	99	0.000251644521139	0.0103244556984	1.0,1.0	0.642,1.0	0.179
6403	ENSG00000078674.19	PCM1	chr8	+	17983232	17983289	17980590	17980755	17985446	17985619	6403	36,21	112,111	17,4	129,91	156	99	0.000253212537772	0.0103802588042	0.169,0.107	0.077,0.027	0.086
62948	ENSG00000161813.23	LARP4	chr12	+	50420787	50420887	50416345	50416434	50427761	50427909	62948	3,0	2,2	7,2	0,1	199	99	0.000253913219646	0.0104004437819	0.427,0.0	1.0,0.499	-0.536
50478	ENSG00000196562.16	SULF2	chr20	-	47659398	47659452	47656911	47658392	47659696	47659721	50478	41,45	1,0	92,59	9,5	153	99	0.000256494120961	0.010497547503	0.964,1.0	0.869,0.884	0.105
50968	ENSG00000114107.9	CEP70	chr3	-	138572858	138572914	138571265	138571356	138591853	138591956	50968	32,28	4,4	22,9	0,0	155	99	0.000258620257226	0.0105756324846	0.836,0.817	1.0,1.0	-0.173
80168	ENSG00000275066.5	SYNRG	chr17	-	37577379	37577613	37576340	37576418	37584647	37584759	80168	62,71	5,2	62,50	0,0	333	99	0.000258825637303	0.0105756324846	0.787,0.913	1.0,1.0	-0.15
43666	ENSG00000147996.17	CBWD5	chr9	+	65704330	65704547	65702969	65703014	65708901	65708958	43666	3,5	1,0	3,0	1,4	316	99	0.00025925529887	0.0105845268421	0.485,1.0	0.485,0.0	0.5
83206	ENSG00000130313.7	PGLS	chr19	+	17516370	17516474	17516172	17516280	17517287	17517389	83206	18,5	129,142	4,4	225,175	203	99	0.00026020278489	0.0106145304349	0.064,0.017	0.009,0.011	0.031
17832	ENSG00000138668.19	HNRNPD	chr4	-	82371527	82371584	82359470	82359639	82373445	82373486	17832	932,351	363,92	655,550	355,317	156	99	0.000261971154085	0.0106692346612	0.62,0.708	0.539,0.524	0.132
58750	ENSG00000197165.11	SULT1A2	chr16	-	28593441	28593568	28593251	28593346	28596996	28597050	58750	105,104	1,0	90,55	6,3	226	99	0.000261776968798	0.0106692346612	0.979,1.0	0.868,0.889	0.111
20867	ENSG00000147526.20	TACC1	chr8	+	38744894	38745493	38742350	38742451	38788703	38788819	20867	37,57	3,2	10,15	0,0	698	99	0.000262306583909	0.0106741891126	0.636,0.802	1.0,1.0	-0.281
36988	ENSG00000142856.17	ITGB3BP	chr1	-	63447564	63447614	63446805	63446856	63453917	63453974	36988	11,9	30,31	3,3	57,34	149	99	0.000266587912647	0.0108395774156	0.196,0.162	0.034,0.055	0.135
79340	ENSG00000167840.14	ZNF232	chr17	-	5108925	5109052	5105268	5106533	5109393	5109768	79340	33,42	0,0	55,55	6,2	226	99	0.000268613843646	0.0109130657665	1.0,1.0	0.801,0.923	0.138
59733	ENSG00000166473.18	PKD1L2	chr16	-	81139507	81139712	81137436	81137533	81141296	81141525	59733	12,12	0,1	7,2	3,1	304	99	0.000269793067131	0.0109520631178	1.0,0.796	0.432,0.394	0.485
74980	ENSG00000065457.11	ADAT1	chr16	-	75618585	75618640	75617141	75617272	75620265	75620334	74980	31,59	0,2	16,10	4,3	154	99	0.000270434800082	0.0109691957781	1.0,0.95	0.72,0.682	0.274
23335	ENSG00000268362.6	ENSG00000268362	chr19	+	24034522	24034712	24033506	24033621	24036252	24036382	23335	7,8	8,5	1,0	4,3	289	99	0.000270857027575	0.0109723256158	0.231,0.354	0.079,0.0	0.253
56082	ENSG00000121057.13	AKAP1	chr17	+	57086372	57086537	57085245	57085398	57105440	57105485	56082	3,3	0,0	6,6	3,1	264	99	0.000270951462705	0.0109723256158	1.0,1.0	0.429,0.692	0.44
26403	ENSG00000174990.8	CA5A	chr16	-	87893618	87893726	87891798	87891954	87901911	87901974	26403	53,53	19,24	45,45	58,37	207	99	0.000272541192223	0.0110277587268	0.572,0.514	0.271,0.368	0.223
15290	ENSG00000160746.13	ANO10	chr3	-	43551471	43551588	43549719	43549848	43555277	43555411	15290	6,10	39,22	0,3	35,37	216	99	0.000273854472566	0.0110719252386	0.066,0.172	0.0,0.036	0.101
4808	ENSG00000197619.15	ZNF615	chr19	-	52000345	52000378	51991331	51994837	52001812	52001908	4808	22,22	15,14	16,7	0,2	132	99	0.000275474098971	0.0111228023952	0.524,0.541	1.0,0.724	-0.33
10558	ENSG00000106070.20	GRB10	chr7	-	50727792	50727890	50705139	50705323	50755886	50756056	10558	0,1	1,1	2,2	0,0	197	99	0.000275558401851	0.0111228023952	0.0,0.334	1.0,1.0	-0.833
6557	ENSG00000161249.21	DMKN	chr19	-	35502829	35502886	35502135	35502183	35505717	35505765	6557	149,186	4,0	108,134	11,5	156	99	0.000276013870803	0.01113218787	0.959,1.0	0.862,0.944	0.077
1722	ENSG00000184381.20	PLA2G6	chr22	-	38127406	38127458	38126370	38126449	38128268	38128430	1722	4,6	6,16	0,1	13,7	151	99	0.00027856968738	0.0112262010174	0.304,0.197	0.0,0.086	0.208
50633	ENSG00000114841.18	DNAH1	chr3	+	52398031	52398162	52397706	52397877	52398849	52399201	50633	18,18	1,0	10,12	3,3	230	99	0.000279087783743	0.0112380097823	0.886,1.0	0.589,0.633	0.332
4720	ENSG00000130844.19	ZNF331	chr19	+	53563762	53563792	53555844	53555908	53569303	53569385	4720	8,5	42,75	0,1	61,40	129	99	0.000281620950834	0.0113308748558	0.128,0.049	0.0,0.019	0.079
14133	ENSG00000247828.10	TMEM161B-DT	chr5	+	88283009	88283086	88282714	88282866	88285743	88285851	14133	9,8	5,5	10,2	1,0	176	99	0.000281923802905	0.0113339270554	0.503,0.474	0.849,1.0	-0.436
15213	ENSG00000113494.17	PRLR	chr5	-	35072574	35072744	35070123	35070265	35084469	35084639	15213	72,81	6,2	84,46	0,0	269	99	0.000282608820015	0.0113432001545	0.815,0.937	1.0,1.0	-0.124
57273	ENSG00000090054.16	SPTLC1	chr9	-	92076797	92077035	92067965	92068098	92080015	92080076	57273	20,22	148,158	10,6	184,157	337	99	0.000282519594425	0.0113432001545	0.038,0.039	0.016,0.011	0.025
31926	ENSG00000182473.22	EXOC7	chr17	-	76091142	76091235	76089174	76089320	76094413	76094581	31926	31,45	247,250	15,8	231,136	192	99	0.000285645903658	0.0114558920607	0.061,0.085	0.032,0.029	0.043
7615	ENSG00000160917.15	CPSF4	chr7	+	99447772	99448040	99444788	99444839	99448120	99448273	7615	14,9	36,24	5,2	38,45	367	99	0.000286922881715	0.0114886498853	0.095,0.092	0.034,0.012	0.071
26487	ENSG00000197037.11	ZSCAN25	chr7	+	99619047	99619132	99618524	99618651	99619560	99619816	26487	22,46	0,0	20,18	0,9	184	99	0.000286733581564	0.0114886498853	1.0,1.0	1.0,0.518	0.241
25864	ENSG00000139793.20	MBNL2	chr13	+	97366458	97366553	97357481	97357635	97391321	97391599	25864	281,279	7,13	155,106	14,15	194	99	0.000288598278502	0.0115464748749	0.953,0.916	0.85,0.783	0.118
15066	ENSG00000164294.14	GPX8	chr5	+	55160993	55161255	55160169	55160243	55164054	55164754	15066	7,12	1,3	23,10	0,0	361	99	0.00028916811167	0.0115592894662	0.657,0.523	1.0,1.0	-0.41
21106	ENSG00000101152.11	DNAJC5	chr20	+	63931108	63931182	63930850	63931022	63931464	63936031	21106	256,171	132,122	126,89	135,102	173	99	0.000289613088507	0.0115592894662	0.526,0.445	0.348,0.333	0.145
82824	ENSG00000142459.9	EVI5L	chr19	+	7857091	7857124	7856014	7856068	7858190	7858331	82824	22,12	23,29	0,2	13,7	132	99	0.000289444047878	0.0115592894662	0.418,0.237	0.0,0.176	0.24
49130	ENSG00000172840.7	PDP2	chr16	+	66883014	66883102	66880518	66880640	66884277	66884749	49130	1,0	0,3	3,2	0,0	187	99	0.000290600767888	0.0115894464388	1.0,0.0	1.0,1.0	-0.5
55739	ENSG00000015475.19	BID	chr22	-	17743802	17744013	17739348	17739488	17774380	17774495	55739	133,142	8,4	198,124	0,2	310	99	0.000291513712739	0.0116165771674	0.842,0.919	1.0,0.952	-0.095
20930	ENSG00000280987.4	MATR3	chr5	+	139278564	139278740	139278326	139278408	139279050	139279129	20930	4,13	51,54	5,0	90,79	275	99	0.000292952142877	0.011664588075	0.027,0.08	0.02,0.0	0.043
61634	ENSG00000076685.19	NT5C2	chr10	-	103111744	103111805	103106588	103106706	103139405	103139479	61634	54,48	93,93	27,13	91,74	160	99	0.00029422007228	0.0117057389873	0.264,0.242	0.155,0.098	0.127
3975	ENSG00000282826.4	FRG1CP	chr20	-	28601656	28601756	28600391	28600461	28602608	28602732	3975	341,324	122,102	205,173	117,103	199	99	0.000295431822752	0.0117445910365	0.582,0.612	0.466,0.455	0.136
38096	ENSG00000023697.13	DERA	chr12	+	15958187	15958335	15956935	15957033	15959828	15959924	38096	163,154	6,6	254,166	2,0	247	99	0.000296472050254	0.011774686388	0.916,0.911	0.981,1.0	-0.077
55069	ENSG00000254166.4	CASC19	chr8	-	127203162	127203220	127197474	127197564	127218809	127218842	55069	10,13	0,1	10,4	4,2	157	99	0.000296660501014	0.011774686388	1.0,0.891	0.612,0.558	0.361
79402	ENSG00000035664.11	DAPK2	chr15	-	63929673	63929778	63929550	63929577	63930406	63930455	79402	0,0	1,4	2,3	1,3	204	99	0.000298605589668	0.01184247474	0.0,0.0	0.493,0.327	-0.41
35836	ENSG00000031823.14	RANBP3	chr19	-	5957917	5957968	5933413	5933479	5978060	5978093	35836	3,5	11,12	0,0	7,4	150	99	0.000299034591558	0.0118500763421	0.153,0.216	0.0,0.0	0.184
10789	ENSG00000115363.14	EVA1A	chr2	-	75522364	75522487	75518055	75518208	75560679	75560923	10789	138,178	32,32	163,114	13,9	222	99	0.000299276083094	0.0118502411617	0.658,0.713	0.848,0.85	-0.163
65072	ENSG00000164808.17	SPIDR	chr8	+	47407860	47407961	47293866	47294030	47440322	47440397	65072	39,33	3,4	45,36	0,0	200	99	0.000299593612519	0.0118534141574	0.866,0.803	1.0,1.0	-0.165
82750	ENSG00000167733.14	HSD11B1L	chr19	+	5686899	5686991	5684818	5685119	5687281	5687304	82750	5,8	0,0	1,0	1,1	191	99	0.000303511218785	0.0119989063065	1.0,1.0	0.341,0.0	0.83
39583	ENSG00000132694.19	ARHGEF11	chr1	-	156938417	156938513	156937248	156937496	156939547	156939910	39583	55,55	4,6	19,24	15,7	195	99	0.000306557018684	0.0121097298259	0.875,0.823	0.391,0.635	0.336
29275	ENSG00000240498.9	CDKN2B-AS1	chr9	+	22118643	22118767	22113665	22113799	22120199	22120410	29275	53,64	14,3	5,4	0,0	223	99	0.000307612349642	0.0121322213507	0.627,0.904	1.0,1.0	-0.234
64132	ENSG00000161533.12	ACOX1	chr17	-	75960214	75960375	75957420	75957566	75973624	75973785	64132	185,186	136,159	130,92	181,126	260	99	0.000307443131791	0.0121322213507	0.341,0.308	0.215,0.218	0.108
55195	ENSG00000166750.10	SLFN5	chr17	+	35264182	35264903	35260970	35261096	35265071	35273655	55195	6,6	0,0	2,3	0,4	820	99	0.000309199555187	0.0121851957301	1.0,1.0	1.0,0.083	0.459
42003	ENSG00000114956.20	DGUOK	chr2	+	73938909	73939022	73926825	73927052	73958145	73958245	42003	122,87	54,39	145,83	24,20	212	99	0.000309818539749	0.0121941355847	0.513,0.51	0.738,0.66	-0.188
55869	ENSG00000184999.13	SLC22A10	chr11	+	63297558	63297727	63291539	63291643	63298919	63299043	55869	14,22	3,2	8,1	0,0	268	99	0.000309914843624	0.0121941355847	0.633,0.803	1.0,1.0	-0.282
24382	ENSG00000010270.14	STARD3NL	chr7	+	38201713	38201966	38178389	38178420	38207446	38207729	24382	14,12	82,85	1,6	106,79	352	99	0.000310399753616	0.0122035985022	0.046,0.038	0.003,0.021	0.03
54579	ENSG00000171055.15	FEZ2	chr2	-	36560784	36560865	36558437	36558513	36578596	36578865	54579	55,57	143,137	27,20	148,103	180	99	0.000311045092047	0.0122193489308	0.175,0.186	0.091,0.096	0.087
58253	ENSG00000257524.6	ENSG00000257524	chr9	-	127879513	127879624	127874610	127874649	127885185	127885542	58253	4,5	13,13	0,0	11,8	210	99	0.00031183056266	0.0122405753335	0.127,0.153	0.0,0.0	0.14
5286	ENSG00000167380.17	ZNF226	chr19	+	44166704	44166882	44165587	44165807	44170034	44170095	5286	14,12	42,30	1,2	18,25	277	99	0.00031261072233	0.0122615600759	0.106,0.125	0.019,0.028	0.092
11095	ENSG00000244687.13	UBE2V1	chr20	-	50096671	50096820	50083877	50084254	50113106	50113125	11095	1549,1701	18,33	2011,1829	16,8	248	99	0.000313333870613	0.0122802774675	0.972,0.954	0.98,0.989	-0.021
46829	ENSG00000196141.14	SPATS2L	chr2	+	200378140	200378371	200329430	200329480	200383866	200384017	46829	15,7	8,1	1,2	8,4	330	99	0.000314678117347	0.012323288688	0.36,0.677	0.036,0.13	0.435
38097	ENSG00000023697.13	DERA	chr12	+	15958239	15958335	15956935	15957033	15959828	15959924	38097	100,83	6,6	137,80	2,0	195	99	0.000317609033819	0.0124283202724	0.894,0.875	0.972,1.0	-0.101
65689	ENSG00000075413.19	MARK3	chr14	+	103498501	103498528	103491538	103492034	103502881	103503172	65689	0,0	100,124	4,7	80,60	126	99	0.000318247716548	0.0124435604816	0.0,0.0	0.038,0.084	-0.061
2041	ENSG00000100280.17	AP1B1	chr22	-	29329711	29329720	29327679	29328895	29330377	29330532	2041	59,55	39,35	27,28	51,37	108	99	0.00031901730833	0.0124557833706	0.581,0.59	0.327,0.41	0.217
48853	ENSG00000220804.10	LINC01881	chr2	+	242130654	242130812	242122286	242122455	242138783	242138888	48853	4,8	6,6	1,1	12,7	257	99	0.000319059240371	0.0124557833706	0.204,0.339	0.031,0.052	0.23
40252	ENSG00000115310.19	RTN4	chr2	-	55028163	55028220	54987490	54987698	55049744	55050451	40252	23,26	137,142	11,5	149,107	156	99	0.000319791384658	0.0124746122089	0.096,0.104	0.045,0.029	0.063
203	ENSG00000185825.17	BCAP31	chrX	-	153723507	153723612	153723152	153723288	153724333	153724435	203	7,11	681,671	37,20	711,619	204	99	0.000321332202038	0.0125249322248	0.005,0.008	0.025,0.015	-0.013
73494	ENSG00000119638.14	NEK9	chr14	-	75086647	75086921	75082128	75084686	75087017	75087230	73494	10,14	92,72	1,2	84,51	373	99	0.000323835079166	0.0126126437893	0.028,0.049	0.003,0.01	0.032
25452	ENSG00000131381.12	RBSN	chr3	-	15098118	15098274	15096534	15096710	15099034	15099133	25452	46,57	4,8	22,33	0,1	255	99	0.000324770004405	0.0126391980436	0.817,0.734	1.0,0.928	-0.189
26303	ENSG00000168393.13	DTYMK	chr2	-	241681918	241682333	241678451	241678649	241685768	241685877	26303	90,58	16,32	29,13	32,22	514	99	0.000325110486671	0.0126425947897	0.52,0.259	0.149,0.102	0.264
12997	ENSG00000175322.12	ZNF519	chr18	-	14124349	14124476	14084876	14085076	14132274	14132428	12997	9,7	0,0	7,3	1,3	226	99	0.000327252301036	0.0127159802669	1.0,1.0	0.754,0.305	0.471
24865	ENSG00000151327.14	FAM177A1	chr14	+	35106366	35106484	35099675	35102729	35109894	35109960	24865	1,2	0,0	3,0	2,1	217	99	0.000328104543612	0.0127373692247	1.0,1.0	0.406,0.0	0.797
45969	ENSG00000166295.9	ANAPC16	chr10	+	72223887	72224056	72216011	72216138	72230365	72230440	45969	674,733	19,17	856,655	50,34	268	99	0.000328312955723	0.0127373692247	0.929,0.941	0.863,0.877	0.065
12410	ENSG00000283235.2	ENSG00000283235	chr5	-	176174973	176175060	176173352	176173563	176175147	176175393	12410	11,14	0,0	0,1	1,1	186	99	0.000329763636977	0.0127837175139	1.0,1.0	0.0,0.347	0.827
81451	ENSG00000183077.16	AFMID	chr17	+	78205945	78206050	78190969	78191060	78206910	78207052	81451	895,823	39,28	1111,727	77,58	204	99	0.000330793839697	0.0128137061365	0.918,0.934	0.875,0.859	0.059
39677	ENSG00000196476.12	C20orf96	chr20	-	289558	289676	283962	284081	290258	290307	39677	206,233	13,11	175,171	26,23	217	99	0.000332142194376	0.0128559627189	0.878,0.906	0.754,0.772	0.129
26107	ENSG00000132677.13	RHBG	chr1	+	156382067	156382201	156374606	156374729	156382747	156382869	26107	338,278	0,1	241,216	6,6	233	99	0.000335868928049	0.0129901405472	1.0,0.992	0.945,0.939	0.054
52551	ENSG00000152952.12	PLOD2	chr3	-	146077861	146077924	146076781	146076895	146079115	146079257	52551	753,696	876,814	590,523	1144,819	162	99	0.000339284923745	0.0131101283669	0.344,0.343	0.24,0.281	0.083
64105	ENSG00000198561.16	CTNND1	chr11	+	57791384	57791673	57761796	57762068	57794009	57794081	64105	274,238	2,0	209,157	7,4	388	99	0.000339496424633	0.0131101283669	0.972,1.0	0.884,0.909	0.089
25774	ENSG00000144559.11	TAMM41	chr3	-	11808334	11808583	11807832	11807895	11809516	11810059	25774	14,14	15,12	2,6	20,16	348	99	0.000341559790765	0.0131796150794	0.21,0.249	0.028,0.096	0.167
23499	ENSG00000162650.17	ATXN7L2	chr1	+	109489282	109489706	109488846	109489100	109489929	109490128	23499	33,15	4,1	6,3	6,2	523	99	0.000343600986398	0.0132481396539	0.61,0.74	0.159,0.221	0.485
50255	ENSG00000158864.13	NDUFS2	chr1	+	161213089	161213182	161212591	161212654	161213379	161213475	50255	7,8	7,3	0,1	2,3	192	99	0.000344775333643	0.0132821188145	0.34,0.579	0.0,0.147	0.386
79088	ENSG00000123219.13	CENPK	chr5	-	65551105	65551242	65542801	65542848	65551563	65551636	79088	8,7	38,32	2,1	56,31	236	99	0.000345014281756	0.0132821188145	0.081,0.084	0.015,0.013	0.069
62886	ENSG00000101040.20	ZMYND8	chr20	-	47212641	47212725	47209213	47210897	47221313	47221474	62886	80,105	6,8	137,105	1,2	183	99	0.000345878864701	0.013305144525	0.878,0.877	0.987,0.966	-0.099
8838	ENSG00000135951.16	TSGA10	chr2	-	99118550	99118686	99117543	99117759	99127047	99127176	8838	6,9	16,20	0,1	11,7	235	99	0.000347462947982	0.0133352593818	0.136,0.159	0.0,0.057	0.119
8915	ENSG00000106460.19	TMEM106B	chr7	+	12214200	12214394	12211299	12211425	12214808	12214885	8915	2,2	61,74	7,6	36,27	293	99	0.000347056382017	0.0133352593818	0.011,0.009	0.062,0.07	-0.056
36693	ENSG00000155906.20	RMND1	chr6	-	151445307	151445825	151436234	151436554	151452015	151452018	36693	709,712	13,7	1374,965	4,4	617	99	0.000347265635619	0.0133352593818	0.897,0.942	0.982,0.975	-0.059
50649	ENSG00000163939.18	PBRM1	chr3	-	52681703	52681820	52679581	52679726	52682091	52682233	50649	2,3	2,3	0,0	5,8	216	99	0.000348091128399	0.0133491076283	0.314,0.314	0.0,0.0	0.314
61148	ENSG00000123349.15	PFDN5	chr12	+	53295838	53295941	53295290	53295639	53297849	53297924	61148	1599,1523	173,157	2925,2373	172,180	202	99	0.000349455905499	0.0133808917312	0.819,0.826	0.893,0.866	-0.057
62268	ENSG00000132589.16	FLOT2	chr17	-	28884224	28884315	28882978	28883231	28885856	28885947	62268	96,69	19,10	137,113	6,7	190	99	0.000349227909094	0.0133808917312	0.725,0.782	0.922,0.894	-0.154
25544	ENSG00000074319.13	TSG101	chr11	-	18516098	18516164	18509541	18509665	18526774	18526821	25544	3,2	2,3	8,3	0,1	165	99	0.000351917087753	0.0134442020724	0.474,0.286	1.0,0.643	-0.442
69533	ENSG00000139354.11	GAS2L3	chr12	+	100591735	100591856	100573683	100573785	100594874	100594922	69533	13,13	3,7	2,2	10,3	220	99	0.000351872298758	0.0134442020724	0.661,0.455	0.083,0.231	0.401
69762	ENSG00000189046.11	ALKBH2	chr12	-	109090008	109090207	109088188	109088512	109092506	109092787	69762	81,106	1,1	134,75	9,5	298	99	0.000351779064836	0.0134442020724	0.964,0.972	0.832,0.833	0.135
29573	ENSG00000100226.16	GTPBP1	chr22	+	38735173	38735310	38734323	38734397	38736028	38736175	29573	63,30	8,4	54,56	1,1	236	99	0.00035318376528	0.013482277205	0.768,0.759	0.958,0.959	-0.195
34252	ENSG00000152683.14	SLC30A6	chr2	+	32177476	32177596	32171286	32171373	32192335	32192416	34252	4,6	3,1	3,6	0,0	219	99	0.000353786284797	0.0134915954763	0.376,0.731	1.0,1.0	-0.447
39436	ENSG00000231131.10	LNCAROD	chr10	-	52723895	52724014	52561005	52561115	52755305	52755431	39436	8,6	10,4	0,2	13,4	218	99	0.000353968277702	0.0134915954763	0.266,0.405	0.0,0.185	0.243
3707	ENSG00000118707.11	TGIF2	chr20	+	36576214	36576403	36573722	36573745	36578740	36578966	3707	23,15	49,40	2,4	37,19	288	99	0.00035617507201	0.0135653527998	0.139,0.114	0.018,0.067	0.084
66618	ENSG00000067369.14	TP53BP1	chr15	-	43446765	43446914	43446386	43446590	43447365	43447485	66618	24,21	13,16	7,6	19,14	248	99	0.000358049738439	0.013626357843	0.424,0.344	0.128,0.146	0.247
80999	ENSG00000103226.19	NOMO3	chr16	+	16287742	16287862	16285404	16285506	16293651	16293744	80999	8,8	4,4	1,0	1,3	219	99	0.000359391342174	0.0136669985576	0.475,0.475	0.311,0.0	0.32
49293	ENSG00000177463.16	NR2C2	chr3	+	14962408	14962492	14959535	14959641	15003875	15003986	49293	5,2	4,3	6,3	0,1	183	99	0.000361486727558	0.0137362205431	0.403,0.265	1.0,0.619	-0.475
60224	ENSG00000204147.11	ASAH2B	chr10	+	50745201	50745274	50742914	50743010	50749342	50749402	60224	7,7	0,0	6,3	3,1	172	99	0.000361998899935	0.0137452221085	1.0,1.0	0.535,0.633	0.416
25745	ENSG00000178904.19	DPY19L3	chr19	+	32467473	32467626	32464727	32464784	32468730	32468813	25745	28,36	47,32	8,6	25,32	252	99	0.000362576731532	0.0137567012022	0.19,0.307	0.112,0.069	0.158
60862	ENSG00000138674.17	SEC31A	chr4	-	82842139	82842481	82828999	82829058	82844385	82844460	60862	1501,1487	15,12	1987,1556	41,32	441	99	0.000363780426397	0.0137918910178	0.957,0.965	0.916,0.916	0.045
16445	ENSG00000187838.17	PLSCR3	chr17	-	7393600	7393836	7393466	7393509	7394103	7394159	16445	32,37	1,0	18,37	4,3	335	99	0.000366324426653	0.0138778034501	0.904,1.0	0.571,0.785	0.274
83388	ENSG00000116786.13	PLEKHM2	chr1	+	15721328	15721388	15719733	15719920	15725316	15725545	83388	38,28	55,46	48,34	33,18	159	99	0.000367040407438	0.0138943855829	0.301,0.275	0.475,0.54	-0.22
44670	ENSG00000115718.18	PROC	chr2	+	127419805	127420012	127418427	127418492	127421282	127421449	44670	1162,1061	5,5	824,732	14,11	306	99	0.000370201183901	0.0140034206919	0.987,0.986	0.95,0.956	0.033
21848	ENSG00000166169.17	POLL	chr10	-	101585315	101585478	101584601	101584919	101587245	101587382	21848	104,81	0,1	87,73	7,2	262	99	0.000378640720393	0.0143118166616	1.0,0.968	0.824,0.932	0.106
43646	ENSG00000116209.12	TMEM59	chr1	-	54047266	54047372	54043372	54043525	54052999	54053192	43646	595,594	3,5	599,462	11,15	205	99	0.000380072520629	0.0143550688559	0.99,0.983	0.963,0.937	0.036
37939	ENSG00000163374.20	YY1AP1	chr1	-	155688070	155688201	155680381	155680456	155688929	155689000	37939	91,86	2,0	55,74	8,3	230	99	0.000380436276401	0.014357946876	0.951,1.0	0.747,0.914	0.145
36510	ENSG00000164733.22	CTSB	chr8	-	11861360	11861479	11853328	11853479	11862344	11862478	36510	1,1	1,1	7,3	1,0	218	99	0.000381334359792	0.0143809712377	0.312,0.312	0.761,1.0	-0.569
70915	ENSG00000172915.20	NBEA	chr13	+	35168986	35168995	35164355	35164509	35171271	35171452	70915	3,6	11,12	1,0	8,13	108	99	0.000382337390396	0.0144079156527	0.2,0.314	0.103,0.0	0.206
29093	ENSG00000058799.15	YIPF1	chr1	-	53882942	53883031	53878641	53878722	53883112	53883276	29093	10,10	91,96	2,1	90,63	188	99	0.000382952675536	0.0144202187347	0.055,0.052	0.012,0.008	0.043
58126	ENSG00000165219.23	GAPVD1	chr9	+	125287761	125287883	125261830	125261959	125295457	125295522	58126	3,4	1,4	1,0	5,4	221	99	0.000384540294822	0.0144581938711	0.573,0.309	0.082,0.0	0.4
59712	ENSG00000224597.12	SVIL-AS1	chr10	+	29420490	29420661	29415356	29415412	29482832	29483916	59712	78,72	11,15	113,83	6,3	270	99	0.000384499622379	0.0144581938711	0.722,0.638	0.874,0.91	-0.212
49608	ENSG00000123562.18	MORF4L2	chrX	-	103678498	103678651	103675497	103677051	103685170	103685260	49608	1161,1189	48,47	1351,1055	26,22	252	99	0.000387335458241	0.0145523301471	0.905,0.909	0.953,0.95	-0.044
65849	ENSG00000149231.16	CCDC82	chr11	-	96385936	96386020	96383961	96384761	96387529	96387613	65849	10,6	0,0	6,4	2,2	183	99	0.000388998970146	0.0145928682031	1.0,1.0	0.619,0.52	0.43
80149	ENSG00000278259.5	MYO19	chr17	-	36512657	36512779	36511364	36511455	36513428	36513457	80149	13,14	46,38	3,2	42,26	221	99	0.000388938678034	0.0145928682031	0.112,0.142	0.031,0.033	0.095
6409	ENSG00000254233.1	LINC02365	chr4	-	184623421	184623458	184618888	184619317	184624738	184624879	6409	6,4	2,0	2,0	2,3	136	99	0.000390861567017	0.0146517334105	0.686,1.0	0.421,0.0	0.632
26900	ENSG00000148057.16	IDNK	chr9	+	83628180	83628211	83623142	83623221	83628872	83628959	26900	10,4	0,1	2,6	3,3	130	99	0.000393353496129	0.0147340835823	1.0,0.753	0.337,0.604	0.406
31034	ENSG00000116539.14	ASH1L	chr1	-	155562152	155562295	155521099	155521618	155562778	155562807	31034	20,15	7,5	12,5	1,0	242	99	0.000394766780666	0.0147759371255	0.539,0.551	0.831,1.0	-0.37
54788	ENSG00000180185.13	FAHD1	chr16	+	1838015	1838134	1826966	1827865	1839261	1840207	54788	11,9	0,0	11,18	4,1	218	99	0.00039581381283	0.0148040295793	1.0,1.0	0.555,0.891	0.277
50461	ENSG00000163848.21	ZNF148	chr3	-	125314936	125315053	125313307	125313656	125323308	125323444	50461	14,13	26,35	4,0	27,15	216	99	0.000396652412351	0.0148242901206	0.198,0.145	0.064,0.0	0.139
25882	ENSG00000161040.18	FBXL13	chr7	-	102832839	102832974	102822039	102822203	102854776	102854860	25882	4,1	1,0	2,0	1,1	234	99	0.000397204709899	0.0148338282498	0.629,1.0	0.458,0.0	0.586
31868	ENSG00000127054.22	INTS11	chr1	-	1321907	1321980	1320995	1321093	1324580	1324660	31868	11,4	91,66	3,0	113,105	172	99	0.000398145179401	0.0148578377823	0.065,0.034	0.015,0.0	0.042
73296	ENSG00000029364.12	SLC39A9	chr14	+	69441831	69441972	69424093	69424202	69442068	69442266	73296	2,1	86,74	14,4	89,61	240	99	0.000400602078208	0.0149383587506	0.01,0.006	0.061,0.026	-0.035
39572	ENSG00000007341.19	ST7L	chr1	-	112616812	112616895	112610458	112611003	112618908	112618941	39572	61,46	9,7	49,29	2,0	182	99	0.000402667044543	0.0150041553739	0.787,0.781	0.93,1.0	-0.181
80463	ENSG00000175832.13	ETV4	chr17	-	43544974	43545022	43536315	43536479	43545273	43545367	80463	844,713	2,4	1054,773	19,14	147	99	0.000403318718308	0.015017231114	0.996,0.992	0.974,0.974	0.02
49209	ENSG00000108588.15	CCDC47	chr17	-	63772776	63772863	63765911	63766194	63773411	63773570	49209	0,1	86,81	6,7	77,50	186	99	0.000404162656917	0.0150291654615	0.0,0.007	0.04,0.069	-0.051
50703	ENSG00000288596.2	C8orf44	chr8	+	66676744	66676902	66667651	66667701	66677641	66677954	50703	45,55	3,6	46,27	22,7	257	99	0.000404542235891	0.0150291654615	0.852,0.779	0.446,0.598	0.293
68204	ENSG00000116791.14	CRYZ	chr1	-	74730381	74730420	74724710	74724834	74732955	74733061	68204	97,126	409,463	102,57	640,416	138	99	0.000404354831375	0.0150291654615	0.145,0.163	0.103,0.089	0.058
3792	ENSG00000061656.11	SPAG4	chr20	+	35618086	35618130	35617519	35617586	35618449	35618475	3792	86,73	0,0	73,66	1,8	143	99	0.000409486257285	0.0152015303439	1.0,1.0	0.981,0.851	0.084
4023	ENSG00000101003.12	GINS1	chr20	+	25417103	25417202	25407682	25407895	25441701	25441776	4023	2,4	0,1	1,3	1,5	198	99	0.000410129639491	0.0152028084851	1.0,0.667	0.333,0.231	0.551
11701	ENSG00000137177.20	KIF13A	chr6	-	17771113	17771218	17763692	17764946	17771907	17772059	11701	142,129	24,9	75,69	23,25	204	99	0.000409832320038	0.0152028084851	0.742,0.874	0.613,0.573	0.215
10810	ENSG00000161912.18	ADCY10P1	chr6	+	41124484	41124820	41122976	41123249	41132293	41132513	10810	7,5	0,0	3,0	0,3	435	99	0.000411960261224	0.0152480265405	1.0,1.0	1.0,0.0	0.5
56828	ENSG00000236816.4	ANKRD20A7P	chr9	+	42901237	42901355	42896300	42896450	42903342	42903472	56828	0,1	1,5	2,1	1,0	217	99	0.000411763682001	0.0152480265405	0.0,0.084	0.477,1.0	-0.696
21398	ENSG00000204520.14	MICA	chr6	+	31403444	31403702	31400748	31400763	31410542	31410715	21398	258,203	10,11	193,144	20,22	357	99	0.000415439935253	0.0153627468344	0.877,0.837	0.728,0.645	0.17
52828	ENSG00000122490.19	SLC66A2	chr18	-	79949518	79949655	79943328	79943462	79950723	79951025	52828	32,48	141,121	20,21	167,131	236	99	0.000415985105722	0.0153627468344	0.087,0.143	0.048,0.063	0.059
71533	ENSG00000109458.9	GAB1	chr4	+	143457679	143457769	143440078	143440382	143459384	143459429	71533	5,3	41,35	18,9	34,29	189	99	0.000416139400532	0.0153627468344	0.06,0.043	0.217,0.14	-0.127
79331	ENSG00000108515.18	ENO3	chr17	+	4952024	4952147	4951827	4951914	4952794	4952890	79331	20,12	51,64	8,5	83,72	222	99	0.000416290410105	0.0153627468344	0.149,0.077	0.041,0.03	0.077
6330	ENSG00000100342.22	APOL1	chr22	+	36259668	36259918	36257318	36257407	36261595	36261633	6330	46,39	464,433	35,24	678,585	349	99	0.000418012449785	0.0154149037151	0.027,0.025	0.014,0.012	0.013
51856	ENSG00000113924.12	HGD	chr3	-	120638454	120638581	120633333	120633590	120641588	120641693	51856	978,1060	15,8	891,656	32,13	226	99	0.000420393025878	0.0154798260878	0.966,0.983	0.924,0.957	0.034
82496	ENSG00000166377.21	ATP9B	chr18	+	79361738	79361992	79359395	79359462	79372824	79372882	82496	3,6	8,6	1,0	15,5	353	99	0.00042021546999	0.0154798260878	0.095,0.219	0.018,0.0	0.148
7831	ENSG00000001629.10	ANKIB1	chr7	+	92392240	92392292	92391165	92391344	92396364	92396476	7831	72,93	9,2	56,31	0,0	151	99	0.000421601898015	0.0155014759719	0.84,0.968	1.0,1.0	-0.096
51183	ENSG00000146426.19	TIAM2	chr6	+	154860737	154860998	154832696	154833409	154944115	154944206	51183	36,39	8,0	32,15	0,0	360	99	0.000421547056233	0.0155014759719	0.553,1.0	1.0,1.0	-0.224
28905	ENSG00000119801.13	YPEL5	chr2	+	30155849	30155910	30148244	30148541	30156627	30156792	28905	11,14	28,18	1,4	33,15	160	99	0.000422280530188	0.0155150030558	0.196,0.325	0.018,0.142	0.181
37022	ENSG00000176261.16	ZBTB8OS	chr1	-	32633950	32634072	32627507	32627544	32650432	32650525	37022	66,56	4,7	40,44	17,12	221	99	0.000424625794617	0.0155782443431	0.881,0.782	0.513,0.622	0.264
52330	ENSG00000125885.13	MCM8	chr20	+	5972006	5972037	5967829	5968025	5972575	5972726	52330	15,17	5,3	23,12	0,1	130	99	0.00042443617344	0.0155782443431	0.696,0.812	1.0,0.901	-0.197
19128	ENSG00000137221.14	TJAP1	chr6	+	43478658	43478718	43478086	43478232	43497880	43497977	19128	12,16	89,63	3,4	68,76	159	99	0.000425567751895	0.0156013387811	0.077,0.137	0.027,0.032	0.078
19794	ENSG00000115525.18	ST3GAL5	chr2	-	85851263	85851703	85847860	85848204	85861180	85861292	19794	5,7	18,19	14,2	2,1	539	99	0.000426197738112	0.015612970845	0.049,0.063	0.563,0.269	-0.36
50722	ENSG00000196922.12	ZNF252P	chr8	-	145000351	145000538	144999602	144999769	145002792	145002894	50722	11,8	1,0	4,5	2,2	286	99	0.000426852452616	0.015614043818	0.792,1.0	0.409,0.464	0.46
55512	ENSG00000104529.19	EEF1D	chr8	-	143592646	143592893	143590607	143590738	143597347	143597413	55512	52,42	9,9	38,33	22,20	346	99	0.000426710125264	0.015614043818	0.623,0.572	0.331,0.321	0.271
35640	ENSG00000068745.15	IP6K2	chr3	-	48715314	48715527	48695089	48695418	48717156	48717188	35640	75,65	124,129	96,74	100,63	312	99	0.00042839932665	0.0156591557679	0.161,0.138	0.233,0.272	-0.103
18542	ENSG00000075539.15	FRYL	chr4	-	48549472	48549623	48548689	48548793	48550591	48550704	18542	28,27	3,3	28,17	0,0	250	99	0.00042909972048	0.0156652080852	0.787,0.781	1.0,1.0	-0.216
46078	ENSG00000149187.19	CELF1	chr11	-	47500860	47500932	47488836	47489024	47506857	47506897	46078	4,4	0,1	1,0	1,1	171	99	0.000429192378694	0.0156652080852	1.0,0.698	0.367,0.0	0.665
55052	ENSG00000254166.4	CASC19	chr8	-	127197474	127197564	127188044	127188115	127218809	127219237	55052	4,9	16,14	6,13	3,2	189	99	0.000429586558855	0.0156681420527	0.116,0.252	0.512,0.773	-0.459
16904	ENSG00000188732.11	FAM221A	chr7	+	23692182	23694913	23691389	23691596	23698191	23698299	16904	2,4	0,0	0,1	1,0	2830	99	0.000429939470699	0.0156695676726	1.0,1.0	0.0,1.0	0.5
5466	ENSG00000105223.21	PLD3	chr19	+	40365717	40365930	40365552	40365585	40366418	40366464	5466	166,150	10,12	127,77	23,16	312	99	0.000435814193424	0.0158720922625	0.84,0.799	0.637,0.604	0.199
36035	ENSG00000196182.11	STK40	chr1	-	36367851	36368084	36358736	36358822	36385722	36385879	36035	38,65	4,2	51,46	0,0	332	99	0.000437706013163	0.015917770534	0.739,0.906	1.0,1.0	-0.177
77848	ENSG00000145495.16	MARCHF6	chr5	+	10381799	10381943	10378758	10378832	10386993	10387066	77848	591,586	7,3	337,270	13,7	243	99	0.00043744286986	0.015917770534	0.972,0.988	0.914,0.94	0.053
1209	ENSG00000044446.12	PHKA2	chrX	-	18902791	18902910	18901484	18901603	18905757	18905815	1209	69,45	272,265	40,20	327,229	218	99	0.000438039801187	0.0159183153661	0.103,0.072	0.053,0.038	0.042
12912	ENSG00000019582.17	CD74	chr5	-	150403120	150403312	150402562	150402625	150404679	150404767	12912	214,188	261,270	108,106	296,181	291	99	0.000438939308895	0.0159278187736	0.218,0.192	0.11,0.166	0.067
43258	ENSG00000162616.9	DNAJB4	chr1	+	78005079	78005321	77979231	77979293	78013050	78013355	43258	106,115	7,8	49,38	16,7	341	99	0.000438888896498	0.0159278187736	0.815,0.807	0.471,0.612	0.269
60865	ENSG00000138674.17	SEC31A	chr4	-	82842184	82842481	82830936	82830975	82844385	82844509	60865	1331,1316	0,0	1757,1379	14,9	396	99	0.000439519321503	0.0159372834001	1.0,1.0	0.969,0.975	0.028
55024	ENSG00000254166.4	CASC19	chr8	-	127187784	127187884	127161583	127162084	127197474	127197564	55024	2,1	1,0	1,0	1,1	199	99	0.000440269804437	0.0159529111795	0.499,1.0	0.332,0.0	0.584
53651	ENSG00000173914.12	RBM4B	chr11	-	66666271	66666493	66665547	66665578	66668614	66668685	53651	81,67	12,15	43,32	25,15	321	99	0.000440753270915	0.0159588481291	0.676,0.579	0.347,0.397	0.255
9499	ENSG00000127990.19	SGCE	chr7	-	94640896	94640964	94639340	94639448	94655989	94656166	9499	6,1	3,2	0,1	5,5	167	99	0.00044112481066	0.0159607267544	0.542,0.229	0.0,0.106	0.333
49574	ENSG00000146039.11	SLC17A4	chr6	+	25768335	25768435	25761922	25762053	25768984	25769190	49574	0,0	1,1	2,1	1,0	199	99	0.000443458451348	0.0160335437612	0.0,0.0	0.499,1.0	-0.75
46563	ENSG00000070882.13	OSBPL3	chr7	-	24863199	24863292	24861612	24861769	24863495	24863599	46563	34,30	0,0	38,43	2,5	192	99	0.00044597097528	0.0161054786871	1.0,1.0	0.907,0.816	0.139
78989	ENSG00000275023.5	MLLT6	chr17	+	38721877	38722227	38720658	38720747	38722677	38722768	78989	138,114	3,5	70,69	0,0	449	99	0.00044609314903	0.0161054786871	0.91,0.834	1.0,1.0	-0.128
38255	ENSG00000130731.16	METTL26	chr16	-	635611	635774	635280	635340	636093	636235	38255	89,58	5,6	59,50	16,13	262	99	0.000446427603913	0.0161059080137	0.871,0.785	0.582,0.592	0.241
9445	ENSG00000112110.10	MRPL18	chr6	+	159790667	159790787	159789811	159789888	159790939	159791126	9445	22,18	5,4	12,8	9,15	219	99	0.000449268280416	0.0161966891765	0.665,0.67	0.376,0.194	0.382
56041	ENSG00000124243.19	BCAS4	chr20	+	50840536	50840930	50830278	50830380	50841765	50841900	56041	8,9	22,42	0,1	30,21	493	99	0.000449684142816	0.0161999848015	0.068,0.041	0.0,0.009	0.05
28901	ENSG00000119801.13	YPEL5	chr2	+	30155814	30155910	30148244	30148541	30156627	30156787	28901	7,10	28,18	0,3	33,15	195	99	0.000450432705222	0.0162152526348	0.113,0.22	0.0,0.092	0.121
30430	ENSG00000213793.6	ZNF888	chr19	-	52918818	52918937	52917858	52917931	52923368	52923428	30430	8,4	2,2	5,2	0,0	218	99	0.000451130317902	0.0162286656363	0.645,0.476	1.0,1.0	-0.44
33319	ENSG00000143624.14	INTS3	chr1	+	153761019	153761109	153760826	153760918	153761569	153761676	33319	59,77	34,45	16,16	29,20	189	99	0.000454492258097	0.0163378350893	0.476,0.473	0.224,0.295	0.215
60864	ENSG00000138674.17	SEC31A	chr4	-	82842184	82842481	82828999	82829058	82844385	82844509	60864	1327,1310	15,12	1777,1392	41,32	396	99	0.00045520388331	0.0163398886395	0.957,0.965	0.916,0.916	0.045
73767	ENSG00000066427.25	ATXN3	chr14	-	92096092	92096134	92093251	92093318	92106528	92106574	73767	1,0	1,2	2,3	0,2	141	99	0.000455098367728	0.0163398886395	0.413,0.0	1.0,0.513	-0.55
64218	ENSG00000263766.6	KPNB1-DT	chr17	-	47626546	47626627	47621526	47622087	47636511	47636601	64218	11,12	3,2	7,4	0,0	180	99	0.000458983621748	0.0164637293229	0.669,0.767	1.0,1.0	-0.282
25912	ENSG00000068120.15	COASY	chr17	+	42562355	42562487	42562150	42562219	42562611	42563322	25912	137,136	31,17	154,106	8,7	231	99	0.000460201952188	0.0164952005178	0.654,0.774	0.892,0.866	-0.165
35936	ENSG00000117308.15	GALE	chr1	-	23799859	23800119	23799365	23799436	23800711	23800773	35936	23,7	92,72	9,5	145,105	359	99	0.000460521710398	0.0164952005178	0.064,0.026	0.017,0.013	0.03
53877	ENSG00000087460.29	GNAS	chr20	+	58898940	58898985	58893094	58895684	58903527	58903585	53877	547,590	1613,1496	549,357	2025,1602	144	99	0.000462363074966	0.0165492836531	0.189,0.213	0.157,0.133	0.056
24674	ENSG00000157181.16	ODR4	chr1	+	186411810	186411893	186406082	186406268	186417543	186417654	24674	22,15	43,39	10,2	51,37	182	99	0.000463154765679	0.0165657454191	0.218,0.173	0.096,0.029	0.133
37239	ENSG00000170271.11	FAXDC2	chr5	-	154838562	154838939	154838130	154838178	154850482	154850613	37239	17,12	120,86	48,42	153,127	476	99	0.000464056646435	0.0165861219851	0.029,0.028	0.061,0.064	-0.034
297	ENSG00000102125.17	TAFAZZIN	chrX	+	154419704	154419746	154419542	154419623	154420031	154420094	297	44,54	2,1	41,26	8,5	141	99	0.000465249050384	0.016616845733	0.939,0.974	0.783,0.785	0.172
14256	ENSG00000039319.17	ZFYVE16	chr5	+	80427491	80427545	80408063	80408153	80434108	80434217	14256	15,5	32,34	2,0	26,14	153	99	0.000466534918864	0.0166293298797	0.233,0.087	0.047,0.0	0.137
44671	ENSG00000115718.18	PROC	chr2	+	127419921	127420012	127418426	127418492	127421282	127421449	44671	920,952	5,5	704,613	14,11	190	99	0.000466597728093	0.0166293298797	0.99,0.99	0.963,0.967	0.025
54160	ENSG00000205133.12	TRIQK	chr8	-	92921502	92921660	92916928	92917007	92966006	92966111	54160	46,42	3,4	31,24	0,0	257	99	0.000466204834262	0.0166293298797	0.855,0.802	1.0,1.0	-0.171
17884	ENSG00000197694.18	SPTAN1	chr9	+	128609650	128609665	128609121	128609284	128611713	128611845	17884	6,9	342,339	14,14	228,175	114	99	0.000469647741954	0.0167260922992	0.015,0.023	0.051,0.065	-0.039
67746	ENSG00000064115.11	TM7SF3	chr12	-	26976259	26976357	26975495	26975658	26980565	26980608	67746	143,180	15,16	243,157	5,7	197	99	0.00047182180357	0.016791542747	0.827,0.85	0.961,0.919	-0.101
64936	ENSG00000110066.16	KMT5B	chr11	-	68179469	68180200	68175017	68175183	68185780	68185928	64936	103,92	3,7	58,64	1,0	830	99	0.000473394649847	0.0168355187048	0.804,0.611	0.874,1.0	-0.23
54357	ENSG00000168952.16	STXBP6	chr14	-	24987885	24987972	24974664	24974850	25010524	25010640	54357	10,13	5,20	3,0	14,7	186	99	0.000474913393286	0.0168775093524	0.516,0.257	0.102,0.0	0.336
60789	ENSG00000151208.17	DLG5	chr10	-	77845210	77845437	77843446	77843706	77853353	77853537	60789	1,1	63,56	11,1	35,24	326	99	0.000475392476198	0.0168825190107	0.005,0.005	0.087,0.012	-0.044
23494	ENSG00000185164.15	NOMO2	chr16	-	18528012	18528071	18527536	18527624	18529500	18529637	23494	11,8	28,26	3,1	36,22	158	99	0.000478314167906	0.0169727348037	0.198,0.162	0.05,0.028	0.141
79033	ENSG00000197912.16	SPG7	chr16	+	89555958	89556085	89554485	89554563	89556886	89557488	79033	49,28	228,184	14,8	151,131	226	99	0.000478612697595	0.0169727348037	0.086,0.062	0.039,0.026	0.041
36983	ENSG00000169507.10	SLC38A11	chr2	-	164944568	164944634	164939449	164939556	164945592	164945727	36983	4,8	0,0	0,1	1,1	165	99	0.000480158291869	0.0170013754303	1.0,1.0	0.0,0.375	0.813
50111	ENSG00000138111.14	MFSD13A	chr10	+	102468286	102468332	102465980	102466087	102468752	102468842	50111	1,2	0,0	1,1	1,2	145	99	0.000480441824361	0.0170013754303	1.0,1.0	0.406,0.254	0.67
80281	ENSG00000198081.11	ZBTB14	chr18	-	5293971	5294001	5293243	5293327	5295812	5296040	80281	3,4	1,7	1,0	6,5	129	99	0.000480088986718	0.0170013754303	0.697,0.305	0.113,0.0	0.445
42185	ENSG00000133731.10	IMPA1	chr8	-	81670938	81671047	81660513	81660667	81673840	81673949	42185	171,154	5,6	98,90	14,9	208	99	0.000482505060441	0.01706229474	0.942,0.924	0.769,0.826	0.136
40496	ENSG00000144674.18	GOLGA4	chr3	+	37266841	37266940	37251394	37251484	37273535	37273601	40496	0,0	83,72	7,3	39,38	198	99	0.000483603746973	0.017089043659	0.0,0.0	0.082,0.038	-0.06
14322	ENSG00000250802.7	ZBED3-AS1	chr5	+	77134304	77134585	77118319	77118521	77139260	77139511	14322	1,0	0,2	2,2	1,0	380	99	0.000485356782136	0.0171388610246	1.0,0.0	0.343,1.0	-0.171
27917	ENSG00000104763.20	ASAH1	chr8	-	18064456	18064468	18063184	18063230	18067219	18067298	27917	62,47	1,3	62,61	9,12	111	99	0.000488151051245	0.0172131851269	0.982,0.933	0.86,0.819	0.118
55820	ENSG00000099783.12	HNRNPM	chr19	+	8462528	8462581	8455404	8455574	8463496	8463504	55820	534,554	14,24	778,773	11,9	152	99	0.000488125502663	0.0172131851269	0.961,0.938	0.979,0.982	-0.031
82711	ENSG00000178078.12	STAP2	chr19	-	4324454	4324529	4324042	4324197	4325215	4325308	82711	150,134	1,4	158,85	12,7	174	99	0.000492877479274	0.0173675832164	0.988,0.95	0.882,0.874	0.091
27918	ENSG00000104763.20	ASAH1	chr8	-	18064456	18064471	18063184	18063230	18067219	18067298	27918	82,56	1,3	82,76	9,12	114	99	0.000495771422456	0.0174572375844	0.986,0.942	0.888,0.846	0.097
81535	ENSG00000262580.5	ENSG00000262580	chr17	-	80205011	80205177	80204498	80204617	80205332	80205434	81535	1,1	0,0	0,1	2,0	265	99	0.000500291352167	0.017603979919	1.0,1.0	0.0,1.0	0.5
37547	ENSG00000117360.13	PRPF3	chr1	+	150327556	150327652	150325750	150325881	150328319	150328466	37547	29,39	52,45	26,15	84,60	195	99	0.000501384525172	0.0176300216383	0.221,0.306	0.136,0.113	0.139
8855	ENSG00000164649.20	CDCA7L	chr7	-	21911616	21911751	21908366	21908507	21916753	21916894	8855	13,19	4,4	14,12	1,0	234	99	0.000503235026085	0.0176826376407	0.579,0.668	0.856,1.0	-0.304
13660	ENSG00000168916.16	ZNF608	chr5	-	124744083	124745172	124701013	124701269	124748532	124748807	13660	27,26	2,5	21,35	1,0	1188	99	0.000505591972851	0.0177457919104	0.529,0.302	0.636,1.0	-0.403
57271	ENSG00000090054.16	SPTLC1	chr9	-	92070123	92070296	92067965	92068098	92080015	92080088	57271	12,12	148,158	2,0	184,157	272	99	0.000505743163336	0.0177457919104	0.029,0.027	0.004,0.0	0.026
44753	ENSG00000162601.12	MYSM1	chr1	-	58663449	58663522	58661405	58661511	58665498	58665631	44753	18,17	65,66	4,0	34,27	172	99	0.000508182470093	0.0178188615971	0.137,0.129	0.063,0.0	0.102
15023	ENSG00000112992.18	NNT	chr5	+	43647923	43648182	43645356	43645510	43649146	43649308	15023	14,15	69,75	4,3	76,53	358	99	0.000509381659362	0.0178483758832	0.053,0.052	0.014,0.015	0.038
76647	ENSG00000103227.19	LMF1	chr16	-	855106	856055	854499	854706	868943	868968	76647	46,28	31,18	6,6	13,14	1048	99	0.000510181225141	0.0178638560677	0.123,0.128	0.042,0.039	0.085
8733	ENSG00000172965.17	MIR4435-2HG	chr2	-	111479906	111480061	111469786	111469987	111494884	111495029	8733	1,1	2,2	10,6	0,2	254	99	0.000511082389122	0.0178828694963	0.163,0.163	1.0,0.539	-0.607
77220	ENSG00000140694.18	PARN	chr16	-	14591912	14592033	14586317	14586361	14593300	14593378	77220	28,27	127,134	3,14	117,97	220	99	0.000512997254241	0.0179373010515	0.09,0.083	0.011,0.061	0.05
81375	ENSG00000239779.7	WBP1	chr2	+	74459477	74459562	74458449	74458671	74459642	74459745	81375	41,30	92,53	21,23	120,85	184	99	0.000514416211236	0.0179743287916	0.193,0.233	0.086,0.127	0.107
65765	ENSG00000176894.10	PXMP2	chr12	+	132695883	132696046	132690262	132690376	132704618	132704898	65765	47,73	0,1	104,71	9,2	262	99	0.000515986451273	0.0180165870619	1.0,0.965	0.814,0.931	0.11
14772	ENSG00000173262.12	SLC2A14	chr12	-	7863368	7863455	7832721	7832814	7869862	7869937	14772	2,3	34,41	9,5	22,14	186	99	0.00051697425287	0.0180258669134	0.03,0.037	0.179,0.16	-0.136
22321	ENSG00000108651.10	UTP6	chr17	-	31884423	31884505	31880180	31880754	31885979	31886061	22321	158,125	6,5	206,146	1,0	181	99	0.000516671101693	0.0180258669134	0.935,0.932	0.991,1.0	-0.062
53878	ENSG00000087460.29	GNAS	chr20	+	58898940	58898985	58893094	58895684	58903530	58903585	53878	1361,1381	894,928	1435,980	1307,1012	144	99	0.000518547076953	0.0180680907881	0.511,0.506	0.43,0.4	0.093
42197	ENSG00000162572.21	SCNN1D	chr1	+	1281225	1281297	1280435	1280666	1282241	1282315	42197	2,7	1,2	0,1	2,1	171	99	0.000519401253804	0.0180852329175	0.537,0.67	0.0,0.367	0.42
33716	ENSG00000173727.14	ENSG00000173727	chr11	+	65455436	65455581	65455256	65455331	65455693	65455819	33716	37,31	0,0	18,20	1,4	244	99	0.000520214855293	0.0181009393308	1.0,1.0	0.88,0.67	0.225
77723	ENSG00000102893.18	PHKB	chr16	+	47633898	47633981	47610825	47610920	47641034	47641090	77723	24,29	270,288	3,5	140,117	182	99	0.000522212916568	0.0181578085913	0.046,0.052	0.012,0.023	0.032
73183	ENSG00000198945.8	L3MBTL3	chr6	+	130049650	130049830	130049281	130049393	130051248	130051343	73183	4,4	2,2	1,0	4,1	279	99	0.00052425822379	0.0182162403424	0.415,0.415	0.081,0.0	0.374
68611	ENSG00000111540.16	RAB5B	chr12	+	55980888	55980922	55979371	55979474	55986868	55987123	68611	0,0	1,2	2,2	2,1	133	99	0.000525581453223	0.0182495184568	0.0,0.0	0.427,0.598	-0.512
18112	ENSG00000079691.19	CARMIL1	chr6	+	25612739	25612886	25610121	25610181	25619446	25620530	18112	0,7	1,5	0,0	4,1	246	99	0.00052930941723	0.0183661907656	0.0,0.36	0.0,0.0	0.18
79310	ENSG00000141480.18	ARRB2	chr17	+	4715150	4715336	4715012	4715043	4715972	4716033	79310	19,11	61,52	2,3	42,34	285	99	0.000530315311716	0.0183883151592	0.098,0.068	0.016,0.03	0.06
23693	ENSG00000005844.19	ITGAL	chr16	+	30489253	30492069	30489081	30489155	30494211	30494363	23693	86,98	0,0	27,25	1,2	2915	99	0.000531987819721	0.0184195182998	1.0,1.0	0.478,0.298	0.612
32983	ENSG00000171574.18	ZNF584	chr19	+	58409964	58410091	58401570	58401662	58415523	58415646	32983	2,0	5,1	5,6	1,2	226	99	0.000532285034692	0.0184195182998	0.149,0.0	0.687,0.568	-0.553
35075	ENSG00000223745.8	CCDC18-AS1	chr1	-	93311489	93311608	93264704	93264772	93324634	93324729	35075	14,14	2,3	2,10	0,0	218	99	0.000533016087823	0.0184195182998	0.761,0.679	1.0,1.0	-0.28
35281	ENSG00000136682.16	CBWD2	chr2	+	113439019	113439117	113437790	113438022	113441350	113441437	35281	28,39	38,52	26,14	72,58	197	99	0.000533059701252	0.0184195182998	0.27,0.274	0.154,0.108	0.141
65825	ENSG00000087053.20	MTMR2	chr11	-	95882373	95882496	95862271	95865676	95887611	95887684	65825	47,21	7,3	20,16	12,10	222	99	0.000532793363882	0.0184195182998	0.75,0.757	0.426,0.416	0.333
9312	ENSG00000103051.21	COG4	chr16	-	70508665	70508824	70508405	70508464	70509230	70509388	9312	19,27	131,112	9,11	165,116	258	99	0.000535313353288	0.0184845996148	0.053,0.085	0.021,0.035	0.041
27083	ENSG00000112425.16	EPM2A	chr6	-	145682408	145682659	145671238	145671399	145686121	145686146	27083	5,4	5,9	0,0	4,2	350	99	0.000539435640974	0.0186140711745	0.22,0.112	0.0,0.0	0.166
33546	ENSG00000159592.11	GPBP1L1	chr1	-	45685575	45685620	45660183	45661225	45686411	45686533	33546	168,182	83,74	156,84	120,72	144	99	0.000540151313264	0.0186258944907	0.582,0.628	0.472,0.445	0.146
40240	ENSG00000123595.8	RAB9A	chrX	+	13703813	13703902	13689127	13689288	13708720	13710504	40240	33,39	17,14	59,45	6,7	188	99	0.000540743256982	0.0186334379326	0.505,0.595	0.838,0.772	-0.255
62348	ENSG00000175470.20	PPP2R2D	chr10	+	131934893	131935006	131934457	131934555	131940030	131940196	62348	10,14	47,42	4,1	41,38	212	99	0.000541135136795	0.0186340817347	0.09,0.135	0.044,0.012	0.085
55870	ENSG00000184999.13	SLC22A10	chr11	+	63302328	63302404	63299513	63299629	63304107	63304216	55870	2,8	1,3	1,1	0,0	175	99	0.000543972423931	0.0187188746377	0.531,0.601	1.0,1.0	-0.434
49884	ENSG00000147155.11	EBP	chrX	+	48522192	48522252	48521868	48521907	48523753	48524072	49884	3,9	18,18	2,2	49,35	159	99	0.000549175283588	0.0188798780524	0.094,0.237	0.025,0.034	0.136
68027	ENSG00000061273.18	HDAC7	chr12	-	47795905	47796016	47795586	47795767	47796206	47796298	68027	9,19	1,2	8,3	7,3	210	99	0.000549407438467	0.0188798780524	0.809,0.817	0.35,0.32	0.478
49873	ENSG00000157036.13	EXOG	chr3	+	38500089	38500164	38497628	38497778	38501354	38501494	49873	2,6	3,5	1,0	5,3	174	99	0.000550966564891	0.0189204343546	0.275,0.406	0.102,0.0	0.29
65571	ENSG00000137944.18	KYAT3	chr1	-	88988251	88988351	88969408	88969467	88992584	88992629	65571	59,74	31,48	42,38	54,49	199	99	0.000552801137974	0.0189573582556	0.486,0.434	0.279,0.278	0.181
82117	ENSG00000187118.14	CMC1	chr3	+	28253730	28253765	28241623	28241812	28263290	28263380	82117	19,5	65,95	3,2	75,74	134	99	0.000552751698141	0.0189573582556	0.178,0.037	0.029,0.02	0.083
49476	ENSG00000151092.18	NGLY1	chr3	-	25720013	25720191	25718943	25719635	25729132	25729318	49476	336,271	1,6	357,300	15,12	277	99	0.000554479104799	0.0190018505022	0.992,0.942	0.895,0.899	0.07
14721	ENSG00000164181.14	ELOVL7	chr5	-	60799179	60799230	60787333	60787431	60844159	60844215	14721	9,11	3,4	8,12	0,1	150	99	0.000555077199777	0.019002284474	0.664,0.645	1.0,0.888	-0.289
76068	ENSG00000111237.19	VPS29	chr12	-	110498819	110498859	110496011	110496203	110502048	110502078	76068	5,7	82,85	1,1	200,150	139	99	0.000555252909967	0.019002284474	0.042,0.055	0.004,0.005	0.044
31258	ENSG00000143367.17	TUFT1	chr1	+	151562584	151562686	151540304	151540426	151563903	151563990	31258	36,44	0,0	64,65	6,2	201	99	0.000556316772819	0.0190256525915	1.0,1.0	0.84,0.941	0.11
38488	ENSG00000121940.17	CLCC1	chr1	-	108962308	108962469	108950308	108950448	108963400	108963450	38488	19,27	0,0	22,17	6,0	260	99	0.000557627341409	0.0190574201122	1.0,1.0	0.583,1.0	0.209
649	ENSG00000147099.21	HDAC8	chrX	-	72349691	72349926	72329537	72330076	72351732	72351838	649	5,6	25,23	1,0	44,31	334	99	0.000560108267542	0.0191247338878	0.056,0.072	0.007,0.0	0.06
75733	ENSG00000128973.13	CLN6	chr15	-	68209636	68209759	68206991	68208410	68218535	68218644	75733	39,61	0,1	69,64	5,5	222	99	0.000560363014516	0.0191247338878	1.0,0.965	0.86,0.851	0.127
26522	ENSG00000074800.16	ENO1	chr1	-	8870824	8870883	8867987	8868057	8871890	8871986	26522	8,3	14,20	11,9	3,6	158	99	0.000560866036541	0.0191288265509	0.264,0.086	0.697,0.485	-0.416
22653	ENSG00000261390.8	MAFTRR	chr16	-	79721474	79721621	79715223	79716840	79751213	79751276	22653	0,4	1,2	1,1	0,0	246	99	0.000561256570508	0.019129079742	0.0,0.446	1.0,1.0	-0.777
11246	ENSG00000103852.13	TTC23	chr15	-	99245388	99245510	99228532	99228732	99249170	99249581	11246	6,8	2,4	6,10	0,1	221	99	0.000561813714006	0.0191350071992	0.573,0.473	1.0,0.818	-0.386
36715	ENSG00000144306.15	SCRN3	chr2	+	174397335	174397404	174395794	174396293	174398274	174398442	36715	3,5	4,3	4,4	1,0	168	99	0.000562234185582	0.0191362747923	0.307,0.495	0.702,1.0	-0.45
76929	ENSG00000258867.8	LINC01146	chr14	+	88037350	88037439	88024549	88024669	88044614	88044848	76929	29,25	25,25	13,1	24,23	188	99	0.0005657744737	0.0192436547999	0.379,0.345	0.222,0.022	0.24
58445	ENSG00000187239.18	FNBP1	chr9	-	129923843	129924026	129908889	129908999	129924959	129925157	58445	71,73	10,8	108,86	0,5	282	99	0.000567672572127	0.0192950709318	0.714,0.762	1.0,0.858	-0.191
46232	ENSG00000160783.19	PMF1	chr1	+	156220676	156220887	156213004	156213176	156225556	156225668	46232	4,8	2,6	1,0	2,3	310	99	0.000573103579369	0.0194664182459	0.39,0.299	0.138,0.0	0.276
3973	ENSG00000282826.4	FRG1CP	chr20	-	28601602	28601756	28600391	28600461	28602608	28602769	3973	198,184	122,102	116,100	117,103	253	99	0.000573854343477	0.0194786684053	0.388,0.414	0.28,0.275	0.123
59401	ENSG00000148444.16	COMMD3	chr10	+	22318271	22318306	22318104	22318168	22318652	22318713	59401	129,119	7,5	207,143	1,1	134	99	0.000575246217878	0.0195126487125	0.932,0.946	0.994,0.991	-0.053
58924	ENSG00000266173.7	STRADA	chr17	-	63723297	63723326	63714005	63714108	63726637	63726695	58924	4,4	17,12	0,0	3,1	128	99	0.000576945212259	0.0195569934781	0.154,0.205	0.0,0.0	0.179
83150	ENSG00000116679.16	IVNS1ABP	chr1	-	185306484	185306625	185305535	185305643	185307013	185307139	83150	104,97	289,296	90,57	129,109	240	99	0.000578212522732	0.0195866550017	0.129,0.119	0.223,0.177	-0.076
22969	ENSG00000102312.24	PORCN	chrX	+	48509423	48509577	48509029	48509103	48509783	48509956	22969	5,4	3,2	4,7	0,1	253	99	0.000579766490947	0.0196259801081	0.395,0.439	1.0,0.733	-0.45
59160	ENSG00000227403.3	LINC01806	chr2	+	161245423	161245467	161244719	161244895	161246874	161249095	59160	8,16	0,6	3,5	0,0	143	99	0.000580663872704	0.0196430405339	1.0,0.649	1.0,1.0	-0.175
44714	ENSG00000144233.12	AMMECR1L	chr2	-	127871248	127871359	127870761	127870928	127873827	127874272	44714	88,87	4,7	80,47	0,1	210	99	0.000582651333412	0.0196969287262	0.912,0.854	1.0,0.957	-0.095
6961	ENSG00000003989.18	SLC7A2	chr8	+	17554559	17554699	17551763	17551986	17558294	17558397	6961	805,781	1,5	685,430	12,7	239	99	0.000583842729365	0.0197238506901	0.997,0.985	0.959,0.962	0.031
65114	ENSG00000148481.14	MINDY3	chr10	-	15838227	15838279	15837203	15837318	15841425	15841599	65114	61,88	9,7	31,21	17,6	151	99	0.000585717164051	0.0197737956175	0.816,0.892	0.545,0.696	0.233
23510	ENSG00000196233.14	LCOR	chr10	+	96858291	96858416	96833405	96833479	96907264	96907330	23510	5,6	17,28	0,0	11,8	224	99	0.000587728789099	0.0198207919498	0.115,0.087	0.0,0.0	0.101
59266	ENSG00000152457.19	DCLRE1C	chr10	-	14947524	14947609	14945434	14945565	14949035	14949087	59266	1,0	2,1	6,2	2,1	184	99	0.000587903163919	0.0198207919498	0.212,0.0	0.617,0.518	-0.462
33028	ENSG00000087299.12	L2HGDH	chr14	-	50311290	50311433	50302901	50303017	50312010	50312147	33028	3,6	2,5	1,0	3,3	242	99	0.000590157904726	0.0198699759547	0.38,0.329	0.12,0.0	0.295
34681	ENSG00000072803.18	FBXW11	chr5	-	171996889	171997051	171957596	171957698	172006457	172006649	34681	23,29	3,9	14,10	1,0	261	99	0.000589892812385	0.0198699759547	0.744,0.55	0.842,1.0	-0.274
72087	ENSG00000113360.17	DROSHA	chr5	-	31521122	31521215	31514987	31515219	31526078	31526912	72087	53,71	3,8	45,33	16,9	192	99	0.000596701033492	0.020076738075	0.901,0.821	0.592,0.654	0.238
8706	ENSG00000172965.17	MIR4435-2HG	chr2	-	111248147	111248241	111208755	111208936	111344060	111344237	8706	2,4	1,2	3,3	0,0	193	99	0.000597147236119	0.0200782213109	0.506,0.506	1.0,1.0	-0.494
73055	ENSG00000100997.20	ABHD12	chr20	-	25317047	25317078	25309445	25309575	25323324	25323430	73055	2,4	0,4	0,1	4,2	130	99	0.000599168359997	0.0201326213883	1.0,0.432	0.0,0.276	0.578
36545	ENSG00000185219.18	ZNF445	chr3	-	44458243	44458364	44455120	44455696	44477590	44477670	36545	26,35	10,4	17,9	0,1	220	99	0.000599860801569	0.0201423333444	0.539,0.797	1.0,0.802	-0.233
41724	ENSG00000179818.17	PCBP1-AS1	chr2	-	70032132	70032255	69996685	69996888	70051202	70051305	41724	10,23	2,3	24,15	0,0	222	99	0.00060106562358	0.0201692255719	0.69,0.774	1.0,1.0	-0.268
77523	ENSG00000169592.15	INO80E	chr16	+	30001413	30001530	30000928	30001040	30005220	30005791	77523	92,59	10,5	74,57	25,14	216	99	0.000601722967693	0.0201777229684	0.808,0.844	0.576,0.651	0.213
56605	ENSG00000281649.3	EBLN3P	chr9	+	37084198	37084292	37079870	37080038	37086667	37087837	56605	10,10	5,4	5,8	1,0	193	99	0.000603097968554	0.0202102581664	0.506,0.562	0.719,1.0	-0.325
71668	ENSG00000152767.17	FARP1	chr13	+	98329790	98329939	98328777	98329159	98343761	98343866	71668	0,1	2,0	1,1	0,0	248	99	0.000609546225091	0.0204126442421	0.0,1.0	1.0,1.0	-0.5
16089	ENSG00000137960.6	GIPC2	chr1	+	78094951	78095132	78080674	78080860	78119392	78119499	16089	573,554	15,7	590,447	2,3	280	99	0.000611397769285	0.0204609262856	0.931,0.965	0.991,0.981	-0.038
26899	ENSG00000148057.16	IDNK	chr9	+	83628006	83628211	83623048	83623221	83628872	83628959	26899	10,10	0,1	12,6	3,3	304	99	0.000616033314513	0.0205884601251	1.0,0.765	0.566,0.394	0.403
49606	ENSG00000123562.18	MORF4L2	chrX	-	103678498	103678600	103675495	103677051	103685170	103685260	49606	1107,1172	48,47	1271,1005	26,22	201	99	0.000615907843337	0.0205884601251	0.919,0.925	0.96,0.957	-0.036
53142	ENSG00000136522.14	MRPL47	chr3	-	179602651	179602797	179601729	179601790	179604526	179604638	53142	518,508	13,30	659,578	10,10	245	99	0.000617427527693	0.0206212534349	0.942,0.872	0.964,0.959	-0.054
10432	ENSG00000139540.12	SLC39A5	chr12	+	56230830	56230873	56230239	56230295	56231203	56231289	10432	106,125	14,18	96,59	5,1	142	99	0.000618606664204	0.0206468244321	0.841,0.829	0.93,0.976	-0.118
80542	ENSG00000108433.17	GOSR2	chr17	+	46948942	46949347	46938598	46938704	46963834	46965039	80542	38,41	6,0	46,26	0,0	504	99	0.000619857862359	0.0206747648133	0.554,1.0	1.0,1.0	-0.223
74706	ENSG00000114062.22	UBE3A	chr15	-	25407066	25407262	25405460	25405502	25409087	25409207	74706	90,92	57,62	24,38	62,37	295	99	0.000620644346364	0.0206871781431	0.346,0.332	0.115,0.256	0.153
8856	ENSG00000164649.20	CDCA7L	chr7	-	21911616	21911754	21908129	21908507	21916753	21916894	8856	9,29	4,4	15,15	1,0	237	99	0.000622119409691	0.020710903365	0.485,0.752	0.862,1.0	-0.313
20833	ENSG00000182923.20	CEP63	chr3	+	134547334	134547472	134546148	134546288	134549061	134549176	20833	65,53	42,52	26,25	52,43	237	99	0.00062218571724	0.020710903365	0.393,0.299	0.173,0.195	0.162
56435	ENSG00000261832.6	ENSG00000261832	chr16	-	28479643	28479765	28477736	28477877	28482104	28482198	56435	5,14	57,83	2,5	131,89	221	99	0.0006226129191	0.0207113162316	0.038,0.07	0.007,0.025	0.038
81008	ENSG00000256525.8	POLG2	chr17	-	64483389	64483506	64482918	64482974	64485727	64485868	81008	14,17	0,0	3,2	2,1	216	99	0.000624388806159	0.020756562903	1.0,1.0	0.407,0.478	0.557
73360	ENSG00000119707.14	RBM25	chr14	+	73100300	73100362	73099666	73099750	73103191	73103478	73360	40,26	57,64	19,13	83,66	161	99	0.000625033886588	0.0207641829616	0.301,0.2	0.123,0.108	0.135
1482	ENSG00000054611.14	TBC1D22A	chr22	+	47037070	47037198	46997633	46997709	47111507	47111603	1482	233,192	7,4	269,181	0,0	227	99	0.000626878752793	0.0208116243389	0.936,0.954	1.0,1.0	-0.055
47236	ENSG00000131697.18	NPHP4	chr1	-	5879345	5879632	5877092	5877298	5880113	5880239	47236	15,10	14,9	6,0	16,11	386	99	0.000629556333219	0.0208866294179	0.216,0.222	0.088,0.0	0.175
80921	ENSG00000141376.23	BCAS3	chr17	+	61388617	61388708	61380505	61380571	61391976	61392273	80921	6,5	0,1	8,5	4,3	190	99	0.000632246847992	0.0209619637232	1.0,0.723	0.51,0.465	0.374
8731	ENSG00000172965.17	MIR4435-2HG	chr2	-	111479906	111480061	111429322	111429620	111494884	111495029	8731	3,2	150,146	20,8	189,165	254	99	0.000634247962953	0.0209916219475	0.008,0.005	0.04,0.019	-0.023
23382	ENSG00000114120.14	SLC25A36	chr3	+	140966933	140967036	140963126	140963227	140970926	140970993	23382	47,34	61,64	23,17	84,58	202	99	0.000633583329555	0.0209916219475	0.274,0.207	0.118,0.126	0.118
50303	ENSG00000064607.17	SUGP2	chr19	-	18993637	18993740	18990887	18991149	18994365	18994486	50303	59,52	26,23	65,59	13,5	202	99	0.000634402626	0.0209916219475	0.527,0.526	0.71,0.853	-0.255
78519	ENSG00000261008.9	LINC01572	chr16	-	72570450	72570515	72555264	72555326	72627534	72627686	78519	8,12	2,3	1,7	0,0	164	99	0.000634934866427	0.0209953197454	0.707,0.707	1.0,1.0	-0.293
69422	ENSG00000089639.11	GMIP	chr19	-	19635643	19635721	19635414	19635569	19636706	19636787	69422	17,7	0,0	4,7	2,2	177	99	0.000637183702424	0.0210557375551	1.0,1.0	0.528,0.662	0.405
54127	ENSG00000073417.15	PDE8A	chr15	+	85076732	85076787	85067013	85067204	85083555	85083644	54127	73,58	1,2	34,39	6,5	154	99	0.000639793603754	0.021127998961	0.979,0.949	0.785,0.834	0.154
2746	ENSG00000157538.14	VPS26C	chr21	-	37240495	37240639	37232376	37232451	37267237	37267318	2746	123,137	6,7	140,96	1,1	243	99	0.0006419081074	0.0211838160678	0.893,0.889	0.983,0.975	-0.088
48515	ENSG00000091073.20	DTX2	chr7	+	76476942	76477178	76461696	76461836	76480420	76480447	48515	0,0	4,3	3,3	4,2	335	99	0.000645319533473	0.0212823313249	0.0,0.0	0.181,0.307	-0.244
60026	ENSG00000215126.11	CBWD6	chr9	-	41171846	41171934	41166783	41166830	41172711	41172749	60026	16,15	1,0	6,10	2,3	187	99	0.000647431566738	0.021337891458	0.894,1.0	0.614,0.638	0.321
28904	ENSG00000119801.13	YPEL5	chr2	+	30155849	30155910	30148244	30148305	30156627	30156792	28904	7,11	3,0	0,3	4,3	160	99	0.000649900590415	0.0213927706939	0.591,1.0	0.0,0.382	0.605
67111	ENSG00000111247.15	RAD51AP1	chr12	+	4546308	4546418	4543762	4543904	4548091	4548175	67111	98,102	1,0	106,59	4,5	209	99	0.000649953598819	0.0213927706939	0.979,1.0	0.926,0.848	0.103
62376	ENSG00000137776.17	SLTM	chr15	-	58899468	58899937	58898802	58898852	58901259	58901287	62376	423,480	16,12	495,371	6,2	568	99	0.000651757239925	0.0214380044445	0.822,0.875	0.935,0.97	-0.104
66594	ENSG00000166261.11	ZNF202	chr11	-	123740116	123740232	123730509	123730985	123740416	123740536	66594	18,11	3,2	12,6	0,0	215	99	0.000653655904553	0.0214863021529	0.734,0.717	1.0,1.0	-0.274
78618	ENSG00000050820.17	BCAR1	chr16	-	75237182	75237344	75235667	75235986	75242469	75242702	78618	190,120	9,3	104,100	0,1	261	99	0.000654545490042	0.0215013887258	0.889,0.938	1.0,0.974	-0.074
77749	ENSG00000157827.20	FMNL2	chr2	+	152643418	152643544	152640790	152640914	152647795	152649823	77749	21,15	23,28	2,0	7,7	225	99	0.000655913610331	0.0215321646794	0.287,0.191	0.112,0.0	0.183
39304	ENSG00000141252.21	VPS53	chr17	-	525871	525993	521600	521738	532841	532911	39304	9,7	32,41	2,0	34,17	221	99	0.000658837231886	0.02161393024	0.112,0.071	0.026,0.0	0.079
78785	ENSG00000166167.18	BTRC	chr10	+	101461980	101462058	101354106	101354228	101479367	101479457	78785	39,60	0,0	58,30	4,3	177	99	0.000659451253591	0.0216198690368	1.0,1.0	0.89,0.848	0.131
40702	ENSG00000075651.17	PLD1	chr3	-	171686684	171686798	171677565	171677694	171687370	171687584	40702	14,17	138,117	6,2	125,95	213	99	0.000661274143573	0.0216654063404	0.045,0.063	0.022,0.01	0.038
56332	ENSG00000137073.24	UBAP2	chr9	-	34017049	34017189	33994480	33998864	34048824	34048868	56332	102,74	0,2	53,53	3,6	239	99	0.000663067126335	0.0217099047115	1.0,0.939	0.88,0.785	0.137
42987	ENSG00000247809.11	NR2F2-AS1	chr15	-	96162521	96162691	96131821	96132062	96191351	96191394	42987	5,3	1,0	1,0	0,2	269	99	0.000664223135357	0.0217335028647	0.648,1.0	1.0,0.0	0.324
82686	ENSG00000251095.8	ENSG00000251095	chr4	+	89691284	89691405	89681504	89681684	89719825	89720172	82686	63,62	1,0	94,91	5,6	220	99	0.000667369602609	0.0218221556175	0.966,1.0	0.894,0.872	0.1
11093	ENSG00000244687.13	UBE2V1	chr20	-	50096482	50096820	50084128	50084254	50113106	50113133	11093	1033,1106	18,33	1231,1165	16,8	437	99	0.000669226151149	0.0218685411996	0.929,0.884	0.946,0.971	-0.052
32274	ENSG00000073350.14	LLGL2	chr17	+	75538530	75538636	75525788	75525825	75543396	75543501	32274	6,1	10,9	0,0	7,6	205	99	0.000672225540184	0.0219378388542	0.225,0.051	0.0,0.0	0.138
78565	ENSG00000138380.18	CARF	chr2	+	202941859	202941980	202917876	202918043	202952558	202952679	78565	15,19	3,2	1,8	0,0	220	99	0.000672070352595	0.0219378388542	0.692,0.81	1.0,1.0	-0.249
21289	ENSG00000121310.17	ECHDC2	chr1	-	52905033	52905090	52904645	52904833	52907867	52907954	21289	123,52	4,1	104,83	14,8	156	99	0.000674871502876	0.0220098034031	0.951,0.971	0.825,0.868	0.114
79032	ENSG00000197912.16	SPG7	chr16	+	89555920	89556085	89554485	89554563	89556886	89557343	79032	56,32	228,184	17,10	151,131	264	99	0.000675904327644	0.0220290985533	0.084,0.061	0.041,0.028	0.038
36644	ENSG00000154639.19	CXADR	chr21	+	17561337	17561476	17558975	17559131	17565427	17565611	36644	836,883	20,36	629,424	46,24	238	99	0.000680140434814	0.0221527019248	0.946,0.911	0.85,0.88	0.064
37455	ENSG00000147576.17	ADHFE1	chr8	+	66442797	66442844	66440161	66440199	66444366	66444420	37455	6,4	4,3	1,0	2,2	146	99	0.000683373791577	0.0222390928491	0.504,0.475	0.253,0.0	0.363
52987	ENSG00000184787.19	UBE2G2	chr21	-	44774566	44774741	44773547	44773687	44777298	44777417	52987	96,103	76,68	32,27	49,40	274	99	0.000683683633882	0.0222390928491	0.313,0.354	0.191,0.196	0.14
26246	ENSG00000111843.14	TMEM14C	chr6	+	10724960	10725037	10723124	10723241	10728639	10728727	26246	0,3	3,7	8,4	3,1	176	99	0.000684589411535	0.0222540585334	0.0,0.194	0.6,0.692	-0.549
14838	ENSG00000245888.7	NSMCE1-DT	chr16	+	27288799	27288953	27286661	27286744	27290244	27290468	14838	3,6	2,5	1,0	4,2	253	99	0.000686087867086	0.022288258485	0.37,0.32	0.089,0.0	0.3
34910	ENSG00000158062.21	UBXN11	chr1	-	26297961	26298062	26294204	26294331	26306591	26306633	34910	11,9	3,4	10,8	1,0	200	99	0.000686740761267	0.0222949629069	0.645,0.527	0.832,1.0	-0.33
379	ENSG00000101972.20	STAG2	chrX	+	124021366	124021431	123961705	123961856	124022530	124022671	379	35,32	38,32	18,11	53,26	164	99	0.000688250204454	0.0223294483162	0.357,0.376	0.17,0.203	0.18
56464	ENSG00000287426.1	ENSG00000287426	chr11	-	129783005	129783180	129767312	129767439	129813967	129814690	56464	5,9	13,15	0,0	1,2	274	99	0.000690929311849	0.0224018126428	0.122,0.178	0.0,0.0	0.15
64547	ENSG00000168060.16	NAALADL1	chr11	-	65046444	65046526	65046188	65046362	65047646	65047738	64547	46,44	0,1	150,93	8,8	181	99	0.000691467922328	0.0224047273392	1.0,0.96	0.911,0.864	0.093
44261	ENSG00000163702.21	IL17RC	chr3	+	9920924	9920969	9920490	9920602	9923880	9923981	44261	11,21	68,70	7,3	81,61	144	99	0.000693770671057	0.0224647622416	0.1,0.171	0.056,0.033	0.091
73441	ENSG00000260573.4	ENSG00000260573	chr16	+	50536718	50536768	50532007	50532780	50542157	50542433	73441	7,5	40,19	0,0	4,8	149	99	0.000694580691715	0.0224764151121	0.104,0.149	0.0,0.0	0.127
18759	ENSG00000283050.4	GTF2IP12	chr4	-	119410516	119410712	119410231	119410289	119412351	119412542	18759	21,12	2,7	12,14	1,0	295	99	0.000696415671953	0.0225136225579	0.779,0.365	0.801,1.0	-0.329
31867	ENSG00000127054.22	INTS11	chr1	-	1321907	1321980	1320995	1321093	1323180	1323287	31867	10,7	4,0	1,0	1,1	172	99	0.000696632289599	0.0225136225579	0.59,1.0	0.365,0.0	0.612
8729	ENSG00000172965.17	MIR4435-2HG	chr2	-	111479906	111480061	111367486	111367575	111494884	111495029	8729	1,1	9,9	10,6	17,5	254	99	0.000697206905863	0.0225176183808	0.042,0.042	0.187,0.319	-0.211
40296	ENSG00000106351.13	AGFG2	chr7	+	100562258	100562379	100555609	100555735	100562593	100562682	40296	358,305	5,11	374,319	1,2	220	99	0.000698328304549	0.022539256997	0.97,0.926	0.994,0.986	-0.042
41044	ENSG00000198690.10	FAN1	chr15	+	30910613	30910815	30908117	30908258	30913857	30914091	41044	107,96	2,8	91,66	0,1	301	99	0.000702825404909	0.022669751481	0.946,0.798	1.0,0.956	-0.106
62375	ENSG00000137776.17	SLTM	chr15	-	58899468	58899883	58898802	58898852	58901259	58901287	62375	351,416	16,12	427,303	6,2	514	99	0.000706201147428	0.0227639312409	0.809,0.87	0.932,0.967	-0.11
71316	ENSG00000165416.15	SUGT1	chr13	+	52661474	52661570	52659178	52659249	52662648	52662702	71316	76,83	96,99	80,42	158,116	195	99	0.000706727264349	0.0227661929266	0.287,0.299	0.204,0.155	0.113
4637	ENSG00000133247.14	KMT5C	chr19	+	55342214	55342380	55341615	55342046	55342741	55342851	4637	57,39	6,2	19,8	9,3	265	99	0.000708576115011	0.0228110341706	0.78,0.879	0.441,0.499	0.36
43613	ENSG00000162383.13	SLC1A7	chr1	-	53090611	53090778	53087183	53088227	53092553	53092787	43613	41,28	6,0	16,13	0,0	266	99	0.000709609349799	0.0228295776062	0.718,1.0	1.0,1.0	-0.141
2744	ENSG00000157538.14	VPS26C	chr21	-	37238459	37238609	37232376	37232451	37267237	37267532	2744	71,81	6,7	68,69	1,1	249	99	0.000711534698962	0.0228620585932	0.825,0.821	0.964,0.965	-0.141
48514	ENSG00000091073.20	DTX2	chr7	+	76470299	76470419	76463544	76463709	76480420	76480551	48514	0,0	2,4	4,1	3,2	219	99	0.00071123806873	0.0228620585932	0.0,0.0	0.376,0.184	-0.28
32929	ENSG00000160124.9	MIX23	chr3	-	122368175	122368322	122362967	122363027	122383173	122383231	32929	384,412	13,16	659,494	9,5	246	99	0.000713344574642	0.0229054713546	0.922,0.912	0.967,0.975	-0.054
75167	ENSG00000166262.16	FAM227B	chr15	-	49577171	49577305	49576493	49576845	49577628	49577664	75167	3,4	2,0	0,2	4,6	233	99	0.000717690144881	0.0230301970592	0.389,1.0	0.0,0.124	0.633
34674	ENSG00000072803.18	FBXW11	chr5	-	171957596	171957698	171910571	171910797	171996889	171997051	34674	4,3	7,8	0,0	7,2	201	99	0.000719161404258	0.0230330006902	0.22,0.156	0.0,0.0	0.188
54177	ENSG00000183808.12	RBM12B	chr8	-	93740628	93740696	93728154	93736438	93740880	93741009	54177	14,7	3,2	4,4	0,0	167	99	0.000718395704545	0.0230330006902	0.734,0.675	1.0,1.0	-0.295
80583	ENSG00000176170.14	SPHK1	chr17	+	76377303	76377404	76376583	76376812	76379386	76379727	80583	1,0	1,3	12,15	7,12	200	99	0.000718867250332	0.0230330006902	0.331,0.0	0.459,0.382	-0.255
3751	ENSG00000088367.23	EPB41L1	chr20	+	36218875	36218962	36212271	36212376	36221863	36221934	3751	140,135	8,8	144,105	24,16	186	99	0.00072196937416	0.0230785229329	0.903,0.9	0.762,0.777	0.132
4594	ENSG00000198300.14	PEG3	chr19	-	56827133	56827246	56826387	56826463	56836017	56836104	4594	36,28	77,73	9,6	53,42	212	99	0.000721848197045	0.0230785229329	0.179,0.152	0.073,0.063	0.097
28474	ENSG00000234546.5	LNCTAM34A	chr1	+	9187535	9187789	9183632	9183807	9191392	9192089	28474	4,2	1,4	0,0	3,3	353	99	0.000721490014135	0.0230785229329	0.529,0.123	0.0,0.0	0.326
52000	ENSG00000170502.13	NUDT9	chr4	+	87445321	87445507	87441870	87441915	87449141	87449253	52000	13,19	40,38	8,5	51,52	285	99	0.000723504032362	0.0231078947692	0.101,0.148	0.052,0.032	0.083
64874	ENSG00000172932.16	ANKRD13D	chr11	+	67299057	67299124	67291990	67292180	67299529	67299611	64874	55,66	2,0	42,29	6,3	166	99	0.000723813811441	0.0231078947692	0.943,1.0	0.807,0.852	0.142
34608	ENSG00000244306.11	DUXAP10	chr14	-	19331834	19331948	19307020	19307111	19333701	19333813	34608	20,18	4,2	34,23	1,0	213	99	0.000725221166991	0.0231232554847	0.699,0.807	0.94,1.0	-0.217
75810	ENSG00000198496.12	NBR2	chr17	+	43131207	43131270	43125609	43125770	43138656	43138922	75810	61,49	6,6	70,44	1,1	162	99	0.000724998328811	0.0231232554847	0.861,0.833	0.977,0.964	-0.123
17725	ENSG00000132604.11	TERF2	chr16	-	69368586	69368595	69368375	69368482	69370482	69370629	17725	9,7	46,54	2,1	58,39	108	99	0.000727902005232	0.0231496019256	0.152,0.106	0.031,0.023	0.102
33858	ENSG00000163608.15	NEPRO	chr3	-	113013948	113014032	113008170	113008430	113019541	113019654	33858	7,5	0,1	4,9	4,3	183	99	0.000727371840988	0.0231496019256	1.0,0.73	0.351,0.619	0.38
38672	ENSG00000117569.19	PTBP2	chr1	+	96806418	96806452	96804784	96804939	96806865	96806958	38672	5,5	14,15	1,0	5,15	133	99	0.000727021496371	0.0231496019256	0.21,0.199	0.13,0.0	0.14
49976	ENSG00000157077.16	ZFYVE9	chr1	+	52266654	52266831	52263772	52263872	52268462	52268632	49976	234,182	12,11	127,110	0,3	276	99	0.000727879685937	0.0231496019256	0.875,0.856	1.0,0.929	-0.099
60223	ENSG00000204147.11	ASAH2B	chr10	+	50745127	50745274	50742914	50743010	50749342	50749402	60223	15,23	0,0	9,7	3,1	246	99	0.000728855997265	0.0231651870143	1.0,1.0	0.547,0.738	0.357
40332	ENSG00000196295.13	GARS1-DT	chr7	-	30551317	30551479	30548358	30550781	30552099	30552179	40332	11,3	5,7	4,4	1,0	261	99	0.000733345163825	0.0232930390426	0.455,0.14	0.603,1.0	-0.504
800	ENSG00000235437.10	LINC01278	chrX	-	63509943	63510079	63432363	63432491	63516909	63517082	800	0,1	1,3	4,4	3,1	235	99	0.000734729408479	0.0233073533004	0.0,0.123	0.36,0.628	-0.432
66830	ENSG00000140479.18	PCSK6	chr15	-	101431319	101431463	101429152	101430063	101431989	101432100	66830	404,367	33,32	606,406	92,64	243	99	0.000734551436192	0.0233073533004	0.833,0.824	0.729,0.721	0.104
565	ENSG00000102158.22	MAGT1	chrX	-	77879568	77879613	77875427	77875597	77883932	77884028	565	1,2	0,0	0,1	1,1	144	99	0.000737482707381	0.0233353923081	1.0,1.0	0.0,0.407	0.796
7558	ENSG00000121716.21	PILRB	chr7	+	100353372	100354012	100353209	100353270	100355142	100355240	7558	555,490	13,17	174,171	15,12	739	99	0.000737129721334	0.0233353923081	0.851,0.794	0.608,0.656	0.191
55038	ENSG00000254166.4	CASC19	chr8	-	127191661	127191847	127188044	127188115	127197474	127197564	55038	18,9	4,8	2,1	2,11	285	99	0.000736633120828	0.0233353923081	0.61,0.281	0.258,0.031	0.301
66387	ENSG00000118058.24	KMT2A	chr11	+	118439023	118439122	118436463	118436944	118468774	118468844	66387	2,3	1,5	0,0	1,1	198	99	0.000737164905678	0.0233353923081	0.5,0.231	0.0,0.0	0.365
57657	ENSG00000074582.15	BCS1L	chr2	+	218660306	218660421	218659759	218659800	218660938	218661217	57657	38,22	0,1	19,33	8,1	214	99	0.00073999378044	0.0234000186518	1.0,0.911	0.524,0.939	0.224
10513	ENSG00000257949.7	TEN1	chr17	+	75984580	75984718	75979267	75979511	75984891	75985012	10513	2,2	1,1	0,0	2,1	237	99	0.000742007270009	0.0234401649697	0.455,0.455	0.0,0.0	0.455
78041	ENSG00000144395.18	CCDC150	chr2	+	196720173	196720234	196719496	196719666	196720574	196720668	78041	6,4	25,28	0,0	11,8	160	99	0.000742202255453	0.0234401649697	0.129,0.081	0.0,0.0	0.105
13433	ENSG00000169696.16	ASPSCR1	chr17	+	81982613	81982676	81979183	81979239	81983553	81983668	13433	6,9	114,103	0,0	120,61	162	99	0.000745645710568	0.0235043156404	0.031,0.051	0.0,0.0	0.041
18758	ENSG00000283050.4	GTF2IP12	chr4	-	119410516	119410658	119410231	119410289	119412351	119412542	18758	16,7	2,7	8,11	1,0	241	99	0.000745262296202	0.0235043156404	0.767,0.291	0.767,1.0	-0.354
20457	ENSG00000115073.8	ACTR1B	chr2	-	97660570	97660646	97659351	97659477	97661881	97661946	20457	470,392	4,1	345,282	13,4	175	99	0.000744742028883	0.0235043156404	0.985,0.996	0.938,0.976	0.033
27976	ENSG00000177830.18	CHID1	chr11	-	908541	908645	904705	904859	914746	914820	27976	60,82	11,13	51,52	24,22	203	99	0.000747668701367	0.0235532150965	0.727,0.755	0.509,0.535	0.219
31871	ENSG00000127054.22	INTS11	chr1	-	1321907	1321984	1320995	1321093	1323180	1323287	31871	9,5	4,0	1,0	1,1	176	99	0.000749893016033	0.0235638188694	0.559,1.0	0.36,0.0	0.6
59630	ENSG00000148737.17	TCF7L2	chr10	+	113159919	113159992	113158020	113158069	113165554	113165632	59630	3,3	32,29	10,6	18,14	172	99	0.000748758053742	0.0235638188694	0.051,0.056	0.242,0.198	-0.167
64003	ENSG00000096093.16	EFHC1	chr6	+	52488556	52488675	52479639	52479787	52490139	52490350	64003	4,8	41,45	0,0	33,33	218	99	0.000749636831838	0.0235638188694	0.042,0.075	0.0,0.0	0.058
80771	ENSG00000108848.16	LUC7L3	chr17	+	50749218	50749344	50746541	50746702	50750500	50750550	80771	188,187	787,773	59,82	508,444	225	99	0.000749646522783	0.0235638188694	0.095,0.096	0.049,0.075	0.034
19066	ENSG00000137449.17	CPEB2	chr4	+	15040463	15040487	15033160	15033211	15052413	15052584	19066	4,7	31,39	0,0	6,11	123	99	0.000751790051996	0.0235844578775	0.094,0.126	0.0,0.0	0.11
31872	ENSG00000127054.22	INTS11	chr1	-	1321907	1321984	1320995	1321093	1324580	1324671	31872	9,4	91,66	1,0	113,105	176	99	0.000751966853078	0.0235844578775	0.053,0.033	0.005,0.0	0.04
40829	ENSG00000143429.12	LSP1P4	chr2	-	91654919	91654997	91642998	91643353	91655367	91655378	40829	30,43	2,5	28,18	0,0	177	99	0.000751411802085	0.0235844578775	0.894,0.828	1.0,1.0	-0.139
7296	ENSG00000172765.19	TMCC1	chr3	-	129838897	129839060	129832773	129832826	129857249	129857405	7296	4,4	3,2	8,2	1,0	262	99	0.000753332792518	0.023590942271	0.335,0.43	0.751,1.0	-0.493
55040	ENSG00000254166.4	CASC19	chr8	-	127191665	127191847	127188044	127188115	127197474	127197564	55040	18,9	4,8	2,1	2,11	281	99	0.000753036287424	0.023590942271	0.613,0.284	0.261,0.031	0.302
66371	ENSG00000079385.23	CEACAM1	chr19	-	42511257	42511410	42510888	42510920	42511575	42511628	66371	9,34	148,111	8,7	139,115	252	99	0.000753591014045	0.023590942271	0.023,0.107	0.022,0.023	0.043
31616	ENSG00000087087.20	SRRT	chr7	+	100880695	100880769	100875572	100875712	100881284	100881413	31616	9,16	40,34	9,2	69,49	173	99	0.000755552233369	0.0236375178975	0.114,0.212	0.069,0.023	0.117
82645	ENSG00000130332.15	LSM7	chr19	-	2325979	2326139	2324124	2324192	2328386	2328477	82645	12,12	86,81	1,5	78,83	259	99	0.000756456448982	0.0236509874478	0.051,0.054	0.005,0.023	0.038
18751	ENSG00000180776.17	ZDHHC20	chr13	-	21381900	21381945	21381433	21381546	21382919	21383009	18751	9,3	17,6	3,0	24,14	144	99	0.000760071321049	0.023734284635	0.267,0.256	0.079,0.0	0.222
60863	ENSG00000138674.17	SEC31A	chr4	-	82842139	82842481	82830936	82830975	82844385	82844460	60863	1616,1655	0,0	2042,1675	14,9	441	99	0.000759718881193	0.023734284635	1.0,1.0	0.97,0.977	0.026
45332	ENSG00000166888.12	STAT6	chr12	-	57109940	57110110	57108162	57108299	57111128	57111413	45332	39,26	65,66	31,12	108,88	269	99	0.000763405459108	0.0238086183502	0.181,0.127	0.096,0.048	0.082
81550	ENSG00000185359.14	HGS	chr17	+	81684812	81685069	81684046	81684103	81685604	81685689	81550	79,42	99,96	25,36	103,99	356	99	0.000763371003536	0.0238086183502	0.182,0.108	0.063,0.092	0.067
21851	ENSG00000166169.17	POLL	chr10	-	101585861	101586156	101584610	101584919	101587245	101587382	21851	109,107	0,1	147,104	7,2	394	99	0.000767655126649	0.0239262098182	1.0,0.964	0.841,0.929	0.097
49927	ENSG00000010803.17	SCMH1	chr1	-	41152598	41152741	41142877	41143112	41159724	41159868	49927	42,46	13,11	44,29	34,20	242	99	0.000768575450019	0.0239399505895	0.569,0.631	0.346,0.372	0.241
22893	ENSG00000242282.6	ENSG00000242282	chr2	-	3533107	3533190	3531983	3532310	3533710	3533782	22893	16,10	1,2	6,6	4,7	182	99	0.000774779841006	0.0240624369939	0.897,0.731	0.449,0.318	0.431
35071	ENSG00000223745.8	CCDC18-AS1	chr1	-	93305387	93305470	93264639	93264772	93324634	93324729	35071	17,13	2,3	12,13	0,0	182	99	0.000774670925529	0.0240624369939	0.822,0.702	1.0,1.0	-0.238
43375	ENSG00000079277.22	MKNK1	chr1	-	46560233	46560277	46557406	46558800	46561477	46561642	43375	43,33	19,28	12,14	26,25	143	99	0.000773585495504	0.0240624369939	0.61,0.449	0.242,0.279	0.269
50970	ENSG00000114107.9	CEP70	chr3	-	138572858	138572984	138571265	138571356	138591853	138591956	50970	72,57	4,4	49,18	0,0	225	99	0.000774917359679	0.0240624369939	0.888,0.862	1.0,1.0	-0.125
81619	ENSG00000178927.19	CYBC1	chr17	-	82449169	82449292	82446622	82446696	82450699	82450717	81619	59,67	8,3	79,70	1,1	222	99	0.000774343314387	0.0240624369939	0.767,0.909	0.972,0.969	-0.132
15090	ENSG00000250722.6	SELENOP	chr5	-	42810690	42810778	42808150	42808366	42811835	42811893	15090	528,493	9922,10750	525,400	15589,11680	187	99	0.000776558595528	0.0240984134452	0.027,0.024	0.018,0.018	0.008
1572	ENSG00000100197.23	CYP2D6	chr22	-	42129032	42129185	42128783	42128944	42129737	42129909	1572	9,9	2,2	3,2	0,0	252	99	0.000779270911256	0.0241675626521	0.639,0.639	1.0,1.0	-0.361
69634	ENSG00000163482.12	STK36	chr2	+	218688390	218688493	218685084	218685228	218688696	218688876	69634	42,51	47,61	6,4	14,23	202	99	0.000783374980681	0.0242797617383	0.305,0.291	0.174,0.079	0.171
600	ENSG00000225470.9	JPX	chrX	+	73984443	73984541	73944583	73944662	73994839	73994961	600	3,6	20,17	0,1	22,24	197	99	0.000783869072356	0.0242800041264	0.07,0.151	0.0,0.021	0.1
23276	ENSG00000176915.15	ANKLE2	chr12	-	132741808	132741891	132741418	132741485	132743153	132743276	23276	1,1	68,58	6,7	59,50	182	99	0.000786595925906	0.0243493621676	0.008,0.009	0.052,0.071	-0.053
13913	ENSG00000196247.13	ZNF107	chr7	+	64690398	64690525	64666132	64666285	64691247	64691374	13913	1,4	2,3	0,0	2,5	226	99	0.000788321604568	0.0243629998701	0.18,0.369	0.0,0.0	0.274
41434	ENSG00000169764.16	UGP2	chr2	+	63857549	63857718	63856305	63856433	63857828	63857936	41434	54,57	388,393	46,29	563,415	268	99	0.000788988219543	0.0243629998701	0.049,0.051	0.029,0.025	0.023
45100	ENSG00000115839.19	RAB3GAP1	chr2	+	135060280	135060537	135058010	135058086	135090997	135091130	45100	64,71	159,159	21,39	160,114	356	99	0.000788967257737	0.0243629998701	0.101,0.11	0.035,0.087	0.045
66336	ENSG00000110245.12	APOC3	chr11	+	116830569	116830637	116829906	116829940	116830772	116830882	66336	9179,8884	69,67	20652,16348	258,187	167	99	0.000787856672229	0.0243629998701	0.987,0.987	0.979,0.981	0.007
22669	ENSG00000143643.13	TTC13	chr1	-	230943805	230943898	230940439	230940556	230945388	230945454	22669	55,24	1,0	31,10	5,1	192	99	0.000794028641768	0.0244883533738	0.966,1.0	0.762,0.838	0.183
36350	ENSG00000175066.16	GK5	chr3	-	142186193	142186267	142185928	142185989	142186451	142186513	36350	46,65	7,2	20,14	0,0	173	99	0.000793630206597	0.0244883533738	0.79,0.949	1.0,1.0	-0.131
22641	ENSG00000160767.22	FAM189B	chr1	-	155250275	155250929	155248404	155248473	155251094	155251164	22641	145,110	0,0	178,165	4,3	753	99	0.00079615016505	0.0245386258587	1.0,1.0	0.854,0.879	0.133
11736	ENSG00000198912.12	C1orf174	chr1	-	3891534	3891779	3890568	3891057	3892882	3892996	11736	17,12	50,59	6,1	48,46	344	99	0.000796642222804	0.024538644557	0.089,0.055	0.035,0.006	0.051
16893	ENSG00000118260.15	CREB1	chr2	+	207577109	207577224	207576630	207576693	207577504	207577655	16893	1,2	1,0	1,0	2,1	214	99	0.000797529837962	0.0245508399132	0.316,1.0	0.188,0.0	0.564
16917	ENSG00000076826.10	CAMSAP3	chr19	+	7606776	7606809	7606475	7606571	7608125	7608264	16917	3,2	9,2	0,0	4,2	132	99	0.000798113303846	0.0245536632005	0.2,0.429	0.0,0.0	0.315
80980	ENSG00000198231.14	DDX42	chr17	+	63799479	63799523	63798037	63798099	63800467	63800617	80980	5,1	12,10	0,0	27,17	143	99	0.000799198566442	0.0245567899206	0.224,0.065	0.0,0.0	0.145
81825	ENSG00000263753.10	LINC00667	chr18	+	5241698	5241812	5238061	5239049	5243593	5243643	81825	16,24	0,1	13,7	4,1	213	99	0.00079894715151	0.0245567899206	1.0,0.918	0.602,0.765	0.276
76955	ENSG00000258867.8	LINC01146	chr14	+	88044685	88044848	88024518	88024669	88096498	88097630	76955	45,31	72,57	48,29	32,25	262	99	0.00079987030066	0.0245623148722	0.191,0.17	0.362,0.305	-0.153
66219	ENSG00000103274.11	NUBP1	chr16	+	10767948	10768032	10761756	10761859	10769046	10769313	66219	266,250	8,10	284,227	2,2	183	99	0.000800621086669	0.0245702590525	0.947,0.931	0.987,0.984	-0.046
66509	ENSG00000196914.9	ARHGEF12	chr11	+	120429711	120429831	120429439	120429517	120431770	120431911	66509	277,261	2,2	178,150	9,4	219	99	0.000802161856779	0.0246024224022	0.984,0.983	0.899,0.944	0.062
22970	ENSG00000102312.24	PORCN	chrX	+	48509423	48509707	48508965	48509103	48509783	48509956	22970	13,8	3,2	10,14	0,1	383	99	0.000810642685268	0.0248320244896	0.528,0.508	1.0,0.783	-0.373
65146	ENSG00000254469.11	XNDC1N	chr11	-	71925932	71926104	71923308	71923475	71928364	71928403	65146	5,2	6,6	0,0	1,2	271	99	0.000810401452553	0.0248320244896	0.233,0.109	0.0,0.0	0.171
80214	ENSG00000161395.14	PGAP3	chr17	-	39673992	39674054	39671121	39672866	39684596	39684749	80214	1,1	1,0	0,1	5,0	161	99	0.000813240033375	0.0248963139831	0.381,1.0	0.0,1.0	0.191
485	ENSG00000133138.20	TBC1D8B	chrX	+	106839325	106839457	106827169	106827337	106840047	106840198	485	32,24	2,0	28,23	5,6	231	99	0.00081385225349	0.0248997897482	0.873,1.0	0.706,0.622	0.273
33902	ENSG00000107745.20	MICU1	chr10	-	72477492	72477603	72477173	72477256	72508154	72508269	33902	4,3	167,195	11,11	163,122	210	99	0.000816232570483	0.0249573230109	0.011,0.007	0.031,0.041	-0.027
712	ENSG00000181704.12	YIPF6	chrX	+	68511848	68511977	68499050	68499123	68513326	68513405	712	453,403	8,5	397,322	23,9	228	99	0.000817591944754	0.0249835883681	0.961,0.972	0.882,0.94	0.055
35404	ENSG00000122299.12	ZC3H7A	chr16	-	11769030	11769095	11768314	11768501	11770782	11770841	35404	91,80	16,10	66,61	4,1	164	99	0.000821525095312	0.0250884217333	0.774,0.828	0.909,0.974	-0.141
45342	ENSG00000141127.15	PRPSAP2	chr17	+	18857783	18857853	18856341	18856476	18865801	18865952	45342	3,3	1,1	1,1	4,6	169	99	0.000825427047715	0.0251921747674	0.637,0.637	0.128,0.089	0.528
40136	ENSG00000131389.18	SLC6A6	chr3	+	14444737	14444866	14443623	14443863	14445716	14445851	40136	3,9	40,33	0,1	42,26	228	99	0.000828455695588	0.0252691639196	0.032,0.106	0.0,0.016	0.061
82110	ENSG00000078142.14	PIK3C3	chr18	+	41984879	41985107	41970326	41970456	41987811	41987875	82110	13,10	98,102	5,1	135,88	327	99	0.000831859949193	0.0253575086222	0.039,0.029	0.011,0.003	0.027
57703	ENSG00000066697.15	MSANTD3	chr9	+	100444127	100445237	100442148	100442356	100450556	100451229	57703	34,44	33,35	23,15	45,36	1209	99	0.000833489001864	0.0253916652545	0.078,0.093	0.04,0.033	0.049
16511	ENSG00000153113.24	CAST	chr5	+	96726753	96726859	96722638	96722698	96727488	96727530	16511	0,1	116,111	14,4	135,111	205	99	0.000835630690338	0.0254413878044	0.0,0.004	0.048,0.017	-0.03
55353	ENSG00000169398.20	PTK2	chr8	-	140702569	140702707	140700769	140701022	140706118	140706168	55353	419,388	2,0	330,208	7,5	237	99	0.000841501006612	0.0255905504244	0.989,1.0	0.952,0.946	0.045
72096	ENSG00000100814.18	CCNB1IP1	chr14	-	20317794	20317974	20316226	20316560	20325538	20325653	72096	26,27	396,333	15,7	430,291	279	99	0.000841555021869	0.0255905504244	0.023,0.028	0.012,0.008	0.016
79753	ENSG00000142494.13	SLC47A1	chr17	+	19571477	19571572	19567095	19567228	19572779	19572861	79753	183,172	7,9	346,248	40,26	194	99	0.000842373617412	0.0255998521552	0.93,0.907	0.815,0.83	0.096
76262	ENSG00000140525.20	FANCI	chr15	+	89245755	89245839	89245194	89245311	89247628	89247731	76262	2,2	1,0	2,0	1,1	183	99	0.000843351429202	0.0256139782308	0.52,1.0	0.52,0.0	0.5
19298	ENSG00000124279.12	FASTKD3	chr5	-	7866645	7868196	7865897	7865983	7868978	7869031	19298	280,259	3,1	251,190	11,5	1650	99	0.00084519705036	0.0256388419936	0.848,0.94	0.578,0.695	0.257
53815	ENSG00000147601.15	TERF1	chr8	+	73030335	73030395	73026939	73027052	73032041	73032133	53815	45,46	11,19	47,26	44,21	159	99	0.000845009492005	0.0256388419936	0.718,0.601	0.399,0.435	0.242
20305	ENSG00000165949.13	IFI27	chr14	+	94111624	94111773	94110735	94110797	94114850	94114880	20305	4,1	1,0	1,0	0,2	248	99	0.000847552581305	0.0256946860578	0.615,1.0	1.0,0.0	0.307
43614	ENSG00000162383.13	SLC1A7	chr1	-	53090611	53090806	53087182	53088227	53092553	53092787	43614	56,34	6,0	22,25	0,0	294	99	0.000848525497457	0.0257085719742	0.759,1.0	1.0,1.0	-0.121
41009	ENSG00000138095.20	LRPPRC	chr2	-	43895367	43895566	43894544	43894629	43896633	43896708	41009	25,28	444,458	8,5	676,523	298	99	0.000855149950585	0.0258935671211	0.018,0.02	0.004,0.003	0.015
69193	ENSG00000099330.9	OCEL1	chr19	+	17228802	17228915	17228253	17228309	17229008	17229215	69193	114,84	4,5	112,64	16,11	212	99	0.000856752851115	0.025926379763	0.93,0.887	0.766,0.731	0.16
35299	ENSG00000076242.16	MLH1	chr3	+	37014431	37014544	37012010	37012099	37020309	37020463	35299	48,59	0,0	77,48	1,6	212	99	0.00085767859247	0.0259386734104	1.0,1.0	0.973,0.789	0.119
13474	ENSG00000006837.12	CDKL3	chr5	-	134308573	134308727	134308000	134308466	134319357	134319389	13474	20,21	0,1	22,13	4,2	253	99	0.000858252691332	0.0259403239291	1.0,0.892	0.683,0.718	0.245
16139	ENSG00000109466.14	KLHL2	chr4	+	165223937	165224057	165219933	165220059	165228806	165228913	16139	3,5	17,19	0,0	30,16	219	99	0.000859780454505	0.0259707791131	0.074,0.106	0.0,0.0	0.09
17645	ENSG00000143248.13	RGS5	chr1	-	163308543	163308631	163306232	163306329	163321621	163321787	17645	1,9	0,5	1,2	0,0	187	99	0.000864500217757	0.0260817887449	1.0,0.488	1.0,1.0	-0.256
32094	ENSG00000160867.15	FGFR4	chr5	+	177088238	177088514	177086915	177087033	177089549	177089693	32094	45,54	93,65	33,31	106,102	375	99	0.000864213418206	0.0260817887449	0.113,0.18	0.076,0.074	0.071
22769	ENSG00000250682.6	LINC00491	chr5	-	102636142	102636291	102608496	102609766	102671226	102671283	22769	2,2	1,0	3,0	7,2	248	99	0.000865340182778	0.0260913651366	0.444,1.0	0.146,0.0	0.649
31908	ENSG00000123472.13	ATPAF1	chr1	-	46653816	46653867	46652420	46652628	46658126	46658189	31908	255,273	12,8	261,159	27,14	150	99	0.000867606637457	0.0261439149154	0.933,0.957	0.864,0.882	0.072
50956	ENSG00000151576.10	QTRT2	chr3	+	114056998	114057106	114056736	114056864	114070625	114070838	50956	11,11	0,0	25,7	4,1	207	99	0.000873710575754	0.0263119678878	1.0,1.0	0.749,0.77	0.24
60916	ENSG00000178498.16	DTX3	chr12	+	57605343	57605731	57604638	57604858	57606189	57606252	60916	144,122	7,16	101,78	1,2	487	99	0.000874958202351	0.026333657626	0.807,0.608	0.954,0.888	-0.214
45493	ENSG00000161010.16	MRNIP	chr5	-	179851242	179851424	179847977	179848066	179853377	179853437	45493	6,8	21,20	0,3	33,18	281	99	0.000876881760986	0.0263756525348	0.091,0.124	0.0,0.055	0.08
65312	ENSG00000111450.14	STX2	chr12	-	130795994	130796120	130789599	130791977	130798524	130798635	65312	72,47	4,7	36,32	12,12	225	99	0.000878041543541	0.0263787559029	0.888,0.747	0.569,0.54	0.263
67064	ENSG00000111206.13	FOXM1	chr12	-	2865354	2865399	2864682	2864752	2866392	2866521	67064	56,48	19,12	46,46	28,42	144	99	0.000877618364021	0.0263787559029	0.67,0.733	0.53,0.43	0.222
29280	ENSG00000137996.13	RTCA	chr1	+	100274823	100274965	100273393	100273452	100275598	100275723	29280	269,235	1,1	246,178	5,7	241	99	0.000881391111216	0.0264634633639	0.991,0.99	0.953,0.913	0.057
15925	ENSG00000182621.18	PLCB1	chr20	+	8802055	8802173	8790174	8790261	8962195	8963010	15925	167,145	4,10	145,92	1,1	217	99	0.000882076181262	0.0264681164703	0.95,0.869	0.985,0.977	-0.072
48779	ENSG00000168385.18	SEPTIN2	chr2	+	241316421	241316540	241315354	241315610	241324215	241324241	48779	16,15	134,133	9,5	193,163	218	99	0.000883664474902	0.0264998503882	0.051,0.049	0.021,0.014	0.033
43785	ENSG00000196696.13	PDXDC2P-NPIPB14P	chr16	-	69976810	69978003	69976296	69976732	69978076	69978112	43785	905,865	33,20	364,346	24,23	1292	99	0.000890402304329	0.0266858808268	0.678,0.768	0.537,0.535	0.187
45061	ENSG00000117481.11	NSUN4	chr1	+	46346920	46347075	46344781	46345144	46352867	46352958	45061	157,127	2,7	142,94	0,0	254	99	0.000891283321382	0.0266962612597	0.968,0.876	1.0,1.0	-0.078
33859	ENSG00000163608.15	NEPRO	chr3	-	113013952	113014032	113008170	113008430	113019541	113019603	33859	7,5	0,1	4,10	4,3	179	99	0.000892002754485	0.0267017922867	1.0,0.734	0.356,0.648	0.365
7708	ENSG00000131051.24	RBM39	chr20	-	35734185	35735081	35731940	35732135	35738967	35739017	7708	684,726	1383,1295	358,302	1029,811	995	99	0.000893535145313	0.0267316377116	0.047,0.053	0.033,0.036	0.015
16048	ENSG00000214922.9	HLA-F-AS1	chr6	-	29747147	29747425	29745472	29745727	29748899	29749049	16048	33,40	0,0	35,36	1,4	377	99	0.000895760175623	0.0267821564845	1.0,1.0	0.902,0.703	0.198
484	ENSG00000133138.20	TBC1D8B	chrX	+	106839307	106839457	106827169	106827337	106840047	106840198	484	54,37	2,0	49,37	5,6	249	99	0.000902316899192	0.0269620497268	0.915,1.0	0.796,0.71	0.205
77559	ENSG00000169221.14	TBC1D10B	chr16	-	30359171	30359361	30358662	30358817	30359537	30359603	77559	195,179	0,0	200,151	5,4	289	99	0.000903277315044	0.0269746050344	1.0,1.0	0.932,0.928	0.07
6561	ENSG00000161249.21	DMKN	chr19	-	35505938	35505986	35505717	35505765	35509910	35509961	6561	120,154	0,0	150,134	9,2	147	99	0.000906089245038	0.0270038598208	1.0,1.0	0.918,0.978	0.052
27919	ENSG00000104763.20	ASAH1	chr8	-	18064456	18064474	18063184	18063230	18067219	18067298	27919	92,66	1,3	97,101	9,12	117	99	0.000906346273088	0.0270038598208	0.987,0.949	0.901,0.877	0.079
35028	ENSG00000126214.22	KLC1	chr14	+	103684985	103685036	103679383	103679545	103687080	103687211	35028	22,20	3,8	12,6	13,10	150	99	0.000906961064658	0.0270038598208	0.829,0.623	0.379,0.284	0.394
51426	ENSG00000251600.8	ENSG00000251600	chr4	+	143973109	143973251	143937866	143937923	143978919	143979068	51426	3,4	1,0	1,1	1,1	241	99	0.000905003569688	0.0270038598208	0.552,1.0	0.291,0.291	0.485
59365	ENSG00000078403.17	MLLT10	chr10	+	21668916	21669052	21651672	21651768	21670448	21670704	59365	9,16	86,60	6,0	84,45	235	99	0.000906839547745	0.0270038598208	0.042,0.101	0.029,0.0	0.057
29227	ENSG00000111196.10	MAGOHB	chr12	-	10612814	10612978	10610621	10610680	10613438	10613573	29227	21,24	33,36	13,10	55,42	263	99	0.000907901992268	0.0270157654207	0.193,0.201	0.082,0.082	0.115
30077	ENSG00000144504.16	ANKMY1	chr2	-	240511860	240512001	240509347	240509455	240512801	240512942	30077	10,13	4,4	0,1	1,1	240	99	0.000909161752187	0.0270371384446	0.508,0.573	0.0,0.292	0.394
13912	ENSG00000196247.13	ZNF107	chr7	+	64684086	64684205	64679176	64679336	64684334	64684390	13912	2,6	1,0	1,2	1,2	218	99	0.000911551712056	0.0270920765087	0.476,1.0	0.312,0.312	0.426
22282	ENSG00000234949.2	RAB17-DT	chr2	+	237591565	237591771	237591019	237591267	237591871	237592006	22282	96,101	0,9	36,45	0,0	305	99	0.000913015806355	0.0271194480828	1.0,0.785	1.0,1.0	-0.107
45919	ENSG00000187609.16	EXD3	chr9	-	137354699	137354773	137354338	137354377	137356267	137356368	45919	7,6	4,8	0,1	3,2	173	99	0.000914993750136	0.0271620409858	0.5,0.3	0.0,0.222	0.289
45959	ENSG00000206562.12	METTL6	chr3	-	15414729	15414914	15414020	15414162	15415771	15415860	45959	9,14	15,11	7,4	28,26	284	99	0.000917819924573	0.0272297484574	0.173,0.307	0.08,0.051	0.174
48054	ENSG00000061938.21	TNK2	chr3	-	195885412	195885543	195884829	195885033	195886976	195887047	48054	10,7	25,10	2,3	30,21	230	99	0.00091892275179	0.0272301079642	0.147,0.232	0.028,0.058	0.146
49607	ENSG00000123562.18	MORF4L2	chrX	-	103678498	103678620	103676825	103677051	103685170	103685260	49607	918,934	48,47	994,817	26,22	221	99	0.00091851110252	0.0272301079642	0.895,0.899	0.945,0.943	-0.047
8446	ENSG00000121067.19	SPOP	chr17	-	49668026	49668078	49622732	49622876	49677932	49678003	8446	43,33	96,99	16,14	79,95	151	99	0.000920113987666	0.0272492357759	0.227,0.179	0.117,0.088	0.101
48762	ENSG00000115677.18	HDLBP	chr2	-	241268828	241269295	241268498	241268541	241272760	241272831	48762	118,118	232,204	130,104	356,352	566	99	0.000930450253569	0.0275303209943	0.082,0.092	0.06,0.049	0.032
55517	ENSG00000104529.19	EEF1D	chr8	-	143592714	143592893	143590607	143590738	143597347	143597415	55517	24,29	9,9	23,16	22,20	278	99	0.000930708013825	0.0275303209943	0.487,0.534	0.271,0.222	0.264
50563	ENSG00000114395.11	CYB561D2	chr3	+	50352008	50352046	50350857	50351560	50353240	50354032	50563	14,20	0,1	25,18	3,5	137	99	0.00093266705625	0.0275393251246	1.0,0.935	0.858,0.722	0.177
55151	ENSG00000249859.14	PVT1	chr8	+	128070159	128070361	128010317	128010444	128096517	128096654	55151	31,17	1,0	35,20	4,3	301	99	0.000931814063707	0.0275393251246	0.911,1.0	0.742,0.687	0.241
60730	ENSG00000079393.21	DUSP13	chr10	-	75103893	75104097	75101866	75101961	75109008	75109190	60730	7,19	2,1	5,0	6,1	303	99	0.000932263618812	0.0275393251246	0.533,0.861	0.214,0.0	0.59
65267	ENSG00000166435.16	XRRA1	chr11	-	74859157	74859283	74848114	74848462	74862980	74863021	65267	3,2	1,0	5,0	5,2	225	99	0.000934867475043	0.0275879833903	0.569,1.0	0.306,0.0	0.631
51079	ENSG00000170417.16	TMEM182	chr2	+	102757412	102757539	102736907	102737013	102758388	102758473	51079	3,4	5,1	1,0	5,3	226	99	0.000938173835352	0.0276528676346	0.208,0.637	0.081,0.0	0.382
67037	ENSG00000137513.11	NARS2	chr11	-	78453969	78454045	78443660	78443758	78465875	78466013	67037	16,18	233,227	2,10	273,201	175	99	0.000937817654023	0.0276528676346	0.037,0.043	0.004,0.027	0.024
16095	ENSG00000273328.5	ENSG00000273328	chr3	+	42839093	42839279	42819630	42819711	42887537	42887701	16095	6,4	2,1	4,6	0,0	285	99	0.00095298069268	0.0280561786357	0.51,0.581	1.0,1.0	-0.455
79987	ENSG00000108262.16	GIT1	chr17	-	29578961	29578988	29578730	29578779	29581337	29581380	79987	4,9	47,67	3,0	75,71	126	99	0.000952815044356	0.0280561786357	0.063,0.095	0.03,0.0	0.064
55060	ENSG00000254166.4	CASC19	chr8	-	127202041	127202152	127188044	127188115	127203162	127203198	55060	15,7	16,8	10,8	2,1	210	99	0.000954390140742	0.0280645783966	0.307,0.292	0.702,0.79	-0.447
82404	ENSG00000204611.7	ZNF616	chr19	-	52122407	52122457	52116912	52117024	52123922	52124049	82404	6,0	18,17	7,5	5,5	149	99	0.000953985866559	0.0280645783966	0.181,0.0	0.482,0.399	-0.35
28886	ENSG00000119777.20	TMEM214	chr2	+	27037789	27037892	27037560	27037702	27038145	27038237	28886	40,36	234,219	22,24	320,243	202	99	0.000957019994147	0.028125347456	0.077,0.075	0.033,0.046	0.036
44734	ENSG00000233392.5	UICLM	chr2	-	240956369	240956460	240955023	240955315	240957361	240957617	44734	2,3	0,0	14,18	3,2	190	99	0.000957719616236	0.0281293518578	1.0,1.0	0.709,0.824	0.234
3952	ENSG00000101294.18	HM13	chr20	+	31566209	31566295	31561633	31561736	31569119	31569174	3952	789,783	13,7	1181,982	24,39	185	99	0.000960757462243	0.0281854176541	0.97,0.984	0.963,0.931	0.03
4566	ENSG00000268163.1	ENSG00000268163	chr19	-	57475659	57475786	57456125	57456182	57476633	57476672	4566	9,9	2,2	2,7	0,0	226	99	0.000960562639194	0.0281854176541	0.663,0.663	1.0,1.0	-0.337
21681	ENSG00000121716.21	PILRB	chr7	+	100353894	100354012	100353209	100353270	100355142	100355240	21681	121,124	13,17	39,39	15,12	217	99	0.000961507547485	0.0281908592798	0.809,0.769	0.543,0.597	0.219
18679	ENSG00000221817.12	PPP3CB-AS1	chr10	+	73498732	73498867	73496141	73496906	73499594	73499687	18679	7,12	0,1	6,7	1,4	234	99	0.000966921418058	0.0283329538293	1.0,0.835	0.717,0.425	0.347
81445	ENSG00000183077.16	AFMID	chr17	+	78205439	78205518	78202702	78202751	78206910	78207052	81445	9,8	33,37	6,2	85,54	178	99	0.000967528072177	0.0283341021536	0.132,0.107	0.038,0.02	0.09
37012	ENSG00000176261.16	ZBTB8OS	chr1	-	32631826	32631879	32627507	32627544	32650432	32650525	37012	61,62	4,7	53,47	17,12	152	99	0.000969403069595	0.0283723708487	0.909,0.852	0.67,0.718	0.187
14216	ENSG00000171759.10	PAH	chr12	-	102843645	102843779	102840399	102840515	102844335	102844431	14216	1127,1458	25,33	1566,1027	16,10	233	99	0.000971190986647	0.028408047542	0.95,0.949	0.977,0.978	-0.028
43159	ENSG00000245281.9	ASAH1-AS1	chr8	+	18087024	18087137	18086882	18086936	18095825	18096394	43159	1,2	0,0	0,1	2,0	212	99	0.000974125301959	0.0284771958151	1.0,1.0	0.0,1.0	0.5
32390	ENSG00000163138.19	PACRGL	chr4	+	20701725	20701884	20700459	20700787	20702140	20702196	32390	2,3	1,0	0,1	2,0	258	99	0.000975592694145	0.0285034048048	0.434,1.0	0.0,1.0	0.217
79191	ENSG00000186594.16	MIR22HG	chr17	-	1714370	1714453	1711502	1714014	1716129	1716211	79191	17,12	0,7	7,2	0,0	182	99	0.000976419412227	0.0285108758315	1.0,0.483	1.0,1.0	-0.258
74350	ENSG00000167522.17	ANKRD11	chr16	-	89286038	89286186	89275092	89275191	89288527	89288670	74350	121,105	6,6	74,40	0,1	247	99	0.000978295451343	0.0285489597785	0.89,0.875	1.0,0.941	-0.088
31186	ENSG00000157349.17	DDX19B	chr16	+	70317495	70317588	70315968	70316104	70324584	70324687	31186	297,296	4,3	304,242	16,7	192	99	0.000979526692387	0.0285681935033	0.975,0.981	0.907,0.947	0.051
15398	ENSG00000181450.18	ZNF678	chr1	+	227582513	227582606	227563542	227563724	227646543	227646670	15398	1,0	1,4	4,3	4,0	192	99	0.000982469880097	0.028637305069	0.34,0.0	0.34,1.0	-0.5
37996	ENSG00000060971.19	ACAA1	chr3	-	38126161	38126341	38125825	38125881	38126509	38126700	37996	1955,1879	11,11	2307,1682	27,26	279	99	0.000984500119339	0.028679740641	0.984,0.984	0.968,0.958	0.021
58417	ENSG00000204054.14	LINC00963	chr9	+	129502909	129503139	129493418	129493595	129503322	129503672	58417	82,91	56,64	42,41	58,56	329	99	0.000985358176931	0.0286879994941	0.306,0.3	0.179,0.181	0.123
11957	ENSG00000167232.14	ZNF91	chr19	-	23342169	23342265	23338852	23339054	23358429	23358848	11957	6,0	6,2	0,0	6,3	195	99	0.000987776396838	0.0287339485918	0.337,0.0	0.0,0.0	0.169
44537	ENSG00000164828.18	SUN1	chr7	+	849519	849603	843340	843520	849922	850033	44537	34,38	4,4	41,26	1,0	183	99	0.000988087355193	0.0287339485918	0.821,0.837	0.957,1.0	-0.149
16887	ENSG00000145782.13	ATG12	chr5	-	115840817	115840934	115837627	115837764	115841389	115841544	16887	17,22	98,89	9,4	101,75	216	99	0.000989821546085	0.0287676249229	0.074,0.102	0.039,0.024	0.056
5482	ENSG00000105221.18	AKT2	chr19	-	40269422	40269540	40265221	40265351	40270497	40270769	5482	10,8	2,2	11,1	0,0	217	99	0.000992343783288	0.0288112345431	0.695,0.646	1.0,1.0	-0.33
39341	ENSG00000115977.21	AAK1	chr2	-	69495984	69496080	69457996	69466551	69505568	69505673	39341	11,4	30,30	1,0	16,8	195	99	0.000992476085282	0.0288112345431	0.157,0.063	0.031,0.0	0.095
57648	ENSG00000106785.15	TRIM14	chr9	-	98110068	98110234	98109888	98109984	98118981	98119136	57648	22,17	17,9	6,2	15,7	265	99	0.000998072418073	0.0289568587489	0.326,0.414	0.13,0.096	0.257
29330	ENSG00000185414.20	MRPL30	chr2	+	99186918	99187018	99186176	99186254	99188176	99188257	29330	22,20	188,189	17,2	222,210	199	99	0.00100249651124	0.0290472682971	0.055,0.05	0.037,0.005	0.032
33007	ENSG00000147394.20	ZNF185	chrX	+	152920327	152920411	152918982	152919081	152920706	152920748	33007	11,8	0,1	5,6	4,1	183	99	0.00100340799883	0.0290472682971	1.0,0.812	0.403,0.764	0.323
36948	ENSG00000230074.5	ENSG00000230074	chr9	+	34678095	34678268	34665606	34665767	34680905	34681981	36948	9,9	2,3	15,8	1,0	272	99	0.00100275693099	0.0290472682971	0.621,0.522	0.845,1.0	-0.351
81430	ENSG00000108639.8	SYNGR2	chr17	+	78171509	78171649	78170816	78171054	78171738	78171942	81430	529,488	8,12	802,581	40,23	239	99	0.00100351560779	0.0290472682971	0.965,0.944	0.893,0.913	0.051
80009	ENSG00000163625.16	WDFY3	chr4	-	84726860	84726911	84724425	84724594	84733381	84733609	80009	16,10	38,30	13,12	8,10	150	99	0.00100597000399	0.0291014416392	0.217,0.18	0.517,0.442	-0.281
78850	ENSG00000103194.16	USP10	chr16	+	84704739	84704860	84699994	84700111	84733434	84733503	78850	19,8	194,207	6,0	231,129	220	99	0.00100856774559	0.0291596966445	0.042,0.017	0.012,0.0	0.024
59608	ENSG00000167508.12	MVD	chr16	-	88660747	88660841	88660519	88660637	88663010	88663148	59608	199,149	43,32	79,62	34,29	193	99	0.00101288626585	0.0292676065626	0.704,0.705	0.544,0.523	0.171
56835	ENSG00000021574.13	SPAST	chr2	+	32098795	32098891	32089521	32089605	32114637	32114752	56835	157,162	1,7	105,77	13,5	195	99	0.00101570591138	0.0293321063396	0.988,0.922	0.804,0.887	0.11
66906	ENSG00000229425.5	ENSG00000229425	chr21	-	15405574	15405764	15400497	15400549	15444023	15444081	66906	30,25	5,5	7,5	9,3	289	99	0.00101959630643	0.0294274353621	0.673,0.631	0.21,0.363	0.366
82521	ENSG00000141759.15	TXNL4A	chr18	-	79977597	79977701	79970812	79973856	79988239	79988536	82521	880,783	14,13	1193,912	5,6	203	99	0.00102275554468	0.0295015638945	0.968,0.967	0.991,0.987	-0.021
31328	ENSG00000115392.13	FANCL	chr2	-	58163028	58163074	58161521	58161638	58163433	58163493	31328	44,51	25,33	38,28	8,6	145	99	0.00102506138899	0.0295510047423	0.546,0.513	0.764,0.761	-0.233
39521	ENSG00000160752.15	FDPS	chr1	+	155309788	155309965	155308915	155309076	155310063	155310205	39521	250,204	296,265	209,170	375,352	276	99	0.00103026038441	0.0296837456745	0.233,0.216	0.167,0.148	0.067
498	ENSG00000133142.19	TCEAL4	chrX	+	103585858	103586107	103585522	103585624	103586218	103586291	498	46,27	217,212	19,16	231,207	348	99	0.00103160102323	0.029703884637	0.057,0.035	0.023,0.022	0.024
66889	ENSG00000105053.11	VRK3	chr19	-	50009235	50009289	50007568	50007826	50016023	50016163	66889	89,51	4,4	45,46	9,11	153	99	0.00103222950966	0.029703884637	0.935,0.892	0.764,0.73	0.166
71486	ENSG00000136153.20	LMO7	chr13	+	75807479	75808199	75804319	75804541	75809153	75809183	71486	20,23	111,117	3,4	90,70	819	99	0.0010327440614	0.029703884637	0.021,0.023	0.004,0.007	0.017
78487	ENSG00000166747.13	AP1G1	chr16	-	71807800	71807838	71789319	71789482	71808014	71808150	78487	3,4	10,3	2,2	0,1	137	99	0.00103614456968	0.02976739615	0.178,0.491	1.0,0.591	-0.461
81614	ENSG00000178927.19	CYBC1	chr17	-	82447579	82447621	82446622	82446696	82450699	82450737	81614	36,41	8,3	46,42	1,1	141	99	0.00103569978557	0.02976739615	0.76,0.906	0.97,0.967	-0.135
76242	ENSG00000008130.15	NADK	chr1	-	1756778	1756882	1756502	1756608	1757180	1757268	76242	19,11	104,87	2,14	177,122	203	99	0.00103715450057	0.0297792762323	0.082,0.058	0.005,0.053	0.041
9291	ENSG00000078269.15	SYNJ2	chr6	+	158043315	158043399	158033454	158033680	158054966	158055028	9291	124,94	5,4	116,93	0,0	183	99	0.00103921182719	0.0298211987031	0.931,0.927	1.0,1.0	-0.071
33464	ENSG00000196262.15	PPIA	chr7	+	44798747	44798904	44796680	44796793	44799246	44799277	33464	381,326	6570,6808	435,332	11261,9853	256	99	0.00103993073288	0.0298246877791	0.022,0.018	0.015,0.013	0.006
56476	ENSG00000108219.16	TSPAN14	chr10	+	80468546	80468687	80454309	80454371	80504727	80504778	56476	48,54	4,3	28,20	0,0	240	99	0.00104517591409	0.0299579096248	0.832,0.881	1.0,1.0	-0.143
20154	ENSG00000175309.15	PHYKPL	chr5	-	178231404	178231523	178229939	178230099	178231668	178231866	20154	46,28	0,0	47,26	6,0	218	99	0.00104578799776	0.0299582561768	1.0,1.0	0.781,1.0	0.109
411	ENSG00000005893.16	LAMP2	chrX	-	120439075	120439293	120431247	120431462	120441729	120441894	411	335,325	156,123	578,423	403,255	317	99	0.00105302548307	0.030148288644	0.401,0.452	0.309,0.341	0.101
7308	ENSG00000172765.19	TMCC1	chr3	-	129867009	129867098	129848342	129848412	129880308	129880559	7308	3,6	25,20	0,0	13,8	188	99	0.00106184651871	0.0303064864798	0.059,0.136	0.0,0.0	0.098
7453	ENSG00000170632.14	ARMC10	chr7	+	103086868	103086937	103086629	103086764	103097276	103097348	7453	25,8	7,6	2,6	12,9	168	99	0.0010621443393	0.0303064864798	0.678,0.44	0.089,0.282	0.374
8443	ENSG00000121067.19	SPOP	chr17	-	49646925	49647122	49636758	49636809	49668026	49668078	8443	2,6	8,5	0,0	1,1	296	99	0.00106070603873	0.0303064864798	0.077,0.286	0.0,0.0	0.181
14979	ENSG00000152684.11	PELO	chr5	+	52799884	52801120	52787915	52788414	52801408	52804044	14979	1089,960	14,10	1165,879	5,2	1335	99	0.00106179133325	0.0303064864798	0.852,0.877	0.945,0.97	-0.093
28966	ENSG00000225292.2	LINC02935	chr10	+	112890965	112891072	112888734	112888807	112905976	112906111	28966	4,2	0,0	1,0	0,2	206	99	0.0010616664535	0.0303064864798	1.0,1.0	1.0,0.0	0.5
30936	ENSG00000008311.16	AASS	chr7	-	122082787	122082891	122081499	122081595	122086011	122086153	30936	39,29	59,47	10,4	39,21	203	99	0.00106247328064	0.0303064864798	0.244,0.231	0.111,0.085	0.139
39134	ENSG00000168137.20	SETD5	chr3	+	9433369	9433562	9428822	9429009	9433844	9433878	39134	123,124	12,20	46,38	17,13	292	99	0.00106282503295	0.0303064864798	0.777,0.678	0.478,0.498	0.24
67846	ENSG00000145901.16	TNIP1	chr5	-	151080323	151080359	151064959	151065131	151080879	151081034	67846	2,5	24,14	1,0	45,31	135	99	0.00106340678762	0.0303064864798	0.058,0.208	0.016,0.0	0.125
3748	ENSG00000088367.23	EPB41L1	chr20	+	36214359	36214440	36212271	36212376	36218875	36218962	3748	218,188	142,139	115,82	131,98	180	99	0.00106530572589	0.0303432859095	0.458,0.427	0.326,0.315	0.122
40398	ENSG00000131778.20	CHD1L	chr1	+	147270931	147271005	147268781	147268878	147272170	147272281	40398	492,504	31,44	391,278	17,6	173	99	0.00106626015562	0.0303531561176	0.901,0.868	0.929,0.964	-0.062
25835	ENSG00000135409.11	AMHR2	chr12	+	53430145	53430282	53429452	53429625	53431176	53431672	25835	2,0	1,1	2,2	1,0	236	99	0.00106795095455	0.0303666623643	0.456,0.0	0.456,1.0	-0.5
76911	ENSG00000171307.19	ZDHHC16	chr10	+	97453798	97453846	97453529	97453663	97454713	97454799	76911	89,104	31,30	93,68	78,36	147	99	0.00106777463059	0.0303666623643	0.659,0.7	0.445,0.56	0.177
12210	ENSG00000141552.18	ANAPC11	chr17	+	81899241	81899542	81894466	81894586	81899919	81900254	12210	51,23	268,310	17,23	342,305	400	99	0.00106937253671	0.0303724915418	0.045,0.018	0.012,0.018	0.017
70546	ENSG00000133030.22	MPRIP	chr17	+	17164108	17167915	17161239	17161356	17171717	17171865	70546	239,204	39,39	74,82	26,30	3906	99	0.00106929519006	0.0303724915418	0.134,0.117	0.067,0.065	0.059
16226	ENSG00000164124.11	TMEM144	chr4	+	158211458	158211574	158210193	158210586	158212607	158212776	16226	108,98	2,0	31,25	4,2	215	99	0.00107100308576	0.030401509423	0.961,1.0	0.781,0.852	0.164
16227	ENSG00000164124.11	TMEM144	chr4	+	158211532	158211574	158210485	158210586	158212607	158212776	16227	35,36	2,0	10,9	4,2	141	99	0.00107199220324	0.0304122969886	0.925,1.0	0.637,0.76	0.264
50969	ENSG00000114107.9	CEP70	chr3	-	138572858	138572932	138571265	138571356	138591853	138591956	50969	56,57	4,4	41,23	0,0	173	99	0.0010824505508	0.0306741421407	0.889,0.891	1.0,1.0	-0.11
75148	ENSG00000232931.6	LINC00342	chr2	-	95813315	95813957	95807051	95807302	95814049	95815156	75148	132,135	17,34	28,30	16,15	741	99	0.00108226819564	0.0306741421407	0.509,0.347	0.189,0.211	0.228
70046	ENSG00000111445.14	RFC5	chr12	+	118017689	118017852	118016728	118016892	118019071	118019136	70046	12,16	19,27	11,6	55,36	262	99	0.00108338609091	0.030683239311	0.193,0.183	0.07,0.059	0.123
65766	ENSG00000176894.10	PXMP2	chr12	+	132701249	132701369	132690262	132690376	132704618	132704900	65766	51,66	0,1	129,73	9,2	219	99	0.00108421853536	0.030689407987	1.0,0.968	0.866,0.943	0.08
19521	ENSG00000138759.20	FRAS1	chr4	+	78466207	78466435	78464442	78464583	78469977	78470091	19521	245,227	8,7	166,141	0,2	327	99	0.00108614205499	0.0307205602241	0.903,0.908	1.0,0.955	-0.072
43615	ENSG00000162383.13	SLC1A7	chr1	-	53090611	53090983	53087519	53088227	53092553	53092787	43615	101,64	6,0	36,34	0,0	471	99	0.0010865496256	0.0307205602241	0.78,1.0	1.0,1.0	-0.11
15712	ENSG00000029639.11	TFB1M	chr6	-	155313137	155313244	155311187	155311339	155314295	155314493	15712	10,11	138,155	2,2	174,110	206	99	0.00108985306162	0.0307874399726	0.034,0.033	0.005,0.009	0.027
49103	ENSG00000157014.11	TATDN2	chr3	+	10278663	10278760	10278278	10278462	10278884	10279034	49103	75,103	72,64	60,46	94,70	196	99	0.00109014828206	0.0307874399726	0.345,0.448	0.244,0.249	0.15
34570	ENSG00000151687.15	ANKAR	chr2	+	189728659	189728821	189728266	189728420	189737682	189737841	34570	6,3	6,0	6,3	0,0	261	99	0.00109548285047	0.0308856884285	0.275,1.0	1.0,1.0	-0.363
55871	ENSG00000184999.13	SLC22A10	chr11	+	63302328	63302543	63299513	63299629	63304107	63304216	55871	10,14	1,3	7,6	0,0	314	99	0.00109519905604	0.0308856884285	0.759,0.595	1.0,1.0	-0.323
78285	ENSG00000159753.15	CARMIL2	chr16	+	67656833	67656881	67656423	67656645	67657238	67657316	78285	3,3	0,1	0,5	2,2	147	99	0.00109428803882	0.0308856884285	1.0,0.669	0.0,0.627	0.521
18500	ENSG00000131375.10	CAPN7	chr3	+	15232110	15232158	15230441	15230535	15232518	15232665	18500	9,8	110,124	0,1	71,58	147	99	0.00109655442293	0.0308984530989	0.052,0.042	0.0,0.011	0.042
62962	ENSG00000102882.12	MAPK3	chr16	-	30115594	30115645	30114545	30114708	30116635	30116790	62962	97,69	263,283	38,38	245,203	150	99	0.00109953557011	0.0309649805703	0.196,0.139	0.093,0.11	0.066
22046	ENSG00000070061.16	ELP1	chr9	-	108884795	108884912	108882124	108882187	108889331	108889393	22046	33,52	185,198	74,62	161,177	216	99	0.00110279816365	0.0310393546275	0.076,0.107	0.174,0.138	-0.065
47671	ENSG00000188092.15	GPR89B	chr1	+	147968894	147968963	147966770	147968428	147969866	147969959	47671	1,2	0,1	0,1	3,0	168	99	0.00110856587578	0.0311665555989	1.0,0.541	0.0,1.0	0.27
67142	ENSG00000067182.9	TNFRSF1A	chr12	-	6330852	6331993	6330597	6330711	6333068	6333147	67142	236,219	2,2	288,190	10,8	1240	99	0.00110800916761	0.0311665555989	0.904,0.897	0.697,0.655	0.225
46836	ENSG00000196141.14	SPATS2L	chr2	+	200439121	200439328	200419249	200419496	200440648	200440784	46836	817,765	311,323	556,389	315,247	306	99	0.00111258468979	0.0312619393055	0.459,0.434	0.363,0.338	0.096
41924	ENSG00000122033.15	MTIF3	chr13	-	27441016	27441077	27439988	27440449	27445087	27445137	41924	26,17	68,64	15,5	83,77	160	99	0.00111413310366	0.0312785631644	0.191,0.141	0.101,0.039	0.096
53037	ENSG00000198885.10	ITPRIPL1	chr2	+	96325746	96325849	96325316	96325565	96326641	96328353	53037	10,10	1,6	44,26	2,0	202	99	0.00111442918967	0.0312785631644	0.831,0.45	0.915,1.0	-0.317
62776	ENSG00000148985.20	PGAP2	chr11	+	3823612	3823740	3811249	3811424	3823882	3824135	62776	5,6	30,16	0,1	17,17	227	99	0.00111561645564	0.0312942950823	0.068,0.141	0.0,0.025	0.092
3901	ENSG00000167104.11	BPIFB6	chr20	+	33037561	33037738	33036444	33036536	33039346	33039520	3901	14,2	0,1	3,4	2,2	276	99	0.00112109179152	0.0314302269749	1.0,0.418	0.35,0.418	0.325
66617	ENSG00000067369.14	TP53BP1	chr15	-	43446765	43446910	43446532	43446590	43447365	43447485	66617	14,19	13,16	6,4	19,14	244	99	0.0011224416383	0.0314504115836	0.304,0.325	0.114,0.104	0.206
62879	ENSG00000100429.18	HDAC10	chr22	-	50250426	50250523	50250062	50250160	50250770	50250905	62879	37,41	5,2	21,18	8,8	196	99	0.00112315334539	0.0314527031344	0.789,0.912	0.57,0.532	0.3
2504	ENSG00000160282.15	FTCD	chr21	-	46145416	46145578	46138879	46138923	46150118	46150250	2504	570,525	3,2	288,217	9,3	261	99	0.00112441891855	0.0314588433413	0.986,0.99	0.924,0.965	0.043
36949	ENSG00000230074.5	ENSG00000230074	chr9	+	34678099	34678268	34665664	34665767	34680905	34681298	36949	7,4	2,3	7,5	1,0	268	99	0.00112463270041	0.0314588433413	0.564,0.33	0.721,1.0	-0.414
82510	ENSG00000131148.9	EMC8	chr16	-	85780378	85780473	85778623	85779867	85781210	85781258	82510	445,385	3,5	490,383	12,15	194	99	0.00112886053901	0.0315594264128	0.987,0.975	0.954,0.929	0.039
13476	ENSG00000006837.12	CDKL3	chr5	-	134312291	134312380	134308137	134308466	134319357	134319497	13476	3,3	0,1	2,4	4,2	188	99	0.00113374992453	0.0316606641397	1.0,0.612	0.208,0.513	0.446
22860	ENSG00000106443.17	PHF14	chr7	+	11061790	11061841	11051611	11051780	11061963	11062085	22860	189,218	8,8	186,201	25,15	150	99	0.00113344577235	0.0316606641397	0.94,0.947	0.831,0.898	0.079
64814	ENSG00000173715.18	C11orf80	chr11	+	66822563	66822674	66816052	66816199	66828265	66828364	64814	40,31	1,6	51,36	1,0	210	99	0.0011350693941	0.031679793134	0.95,0.709	0.96,1.0	-0.151
13697	ENSG00000229180.9	RABGEF1P1	chr7	-	66578528	66578727	66576754	66576932	66588511	66588580	13697	4,8	1,2	5,1	0,0	298	99	0.00114637111804	0.0319773498854	0.571,0.571	1.0,1.0	-0.429
50160	ENSG00000154582.18	ELOC	chr8	-	73964486	73964625	73959764	73959818	73970578	73970634	50160	46,34	11,16	50,44	3,5	238	99	0.00115278754102	0.0321383778396	0.635,0.469	0.874,0.785	-0.277
74866	ENSG00000059145.19	UNKL	chr16	-	1413845	1414055	1403167	1403344	1414614	1414691	74866	46,17	1,4	25,14	0,0	309	99	0.00115383775755	0.0321497059555	0.936,0.577	1.0,1.0	-0.244
18637	ENSG00000139292.13	LGR5	chr12	+	71561780	71561852	71559585	71559654	71566403	71566475	18637	235,258	9,11	158,88	18,10	171	99	0.00115722273525	0.0322260392603	0.938,0.931	0.836,0.836	0.099
13417	ENSG00000164615.6	CAMLG	chr5	+	134743986	134744052	134738496	134741523	134750758	134751377	13417	168,115	4,1	236,177	15,11	165	99	0.00115969257639	0.0322588356723	0.962,0.986	0.904,0.906	0.069
44905	ENSG00000115762.17	PLEKHB2	chr2	+	131144407	131144449	131140166	131140275	131146636	131149851	44905	16,16	284,242	2,6	244,166	141	99	0.00115950637631	0.0322588356723	0.038,0.044	0.006,0.025	0.025
43173	ENSG00000285219.4	HULC	chr6	+	8547116	8547214	8437939	8438031	8558584	8558643	43173	1,4	3,1	0,0	1,1	197	99	0.00116302248835	0.0323334498139	0.143,0.668	0.0,0.0	0.406
5156	ENSG00000125755.19	SYMPK	chr19	-	45861899	45862027	45854390	45854507	45863057	45863194	5156	12,12	42,28	8,2	47,55	227	99	0.00116589782604	0.0323953502237	0.111,0.157	0.069,0.016	0.091
58148	ENSG00000077157.22	PPP1R12B	chr1	+	202443086	202443127	202442525	202442572	202445045	202445228	58148	2,2	1,0	4,3	4,7	140	99	0.00116839216714	0.0324285654794	0.586,1.0	0.414,0.233	0.469
77029	ENSG00000258867.8	LINC01146	chr14	+	88091335	88091652	88084036	88084155	88096498	88097622	77029	141,139	49,65	52,33	35,36	416	99	0.00116776483711	0.0324285654794	0.406,0.337	0.261,0.179	0.152
66899	ENSG00000229425.5	ENSG00000229425	chr21	-	15393970	15394049	15390577	15390618	15394999	15395129	66899	2,8	32,21	0,0	11,8	178	99	0.00117457774054	0.0325821339794	0.034,0.175	0.0,0.0	0.104
38438	ENSG00000117500.13	TMED5	chr1	-	93158814	93158885	93156299	93156483	93160128	93160226	38438	53,42	246,267	20,25	305,179	170	99	0.00118049033401	0.0326735381749	0.111,0.084	0.037,0.075	0.042
40295	ENSG00000106351.13	AGFG2	chr7	+	100556593	100556626	100555666	100555735	100562593	100562682	40295	7,10	5,11	10,10	1,2	132	99	0.00118035225486	0.0326735381749	0.512,0.405	0.882,0.789	-0.377
49537	ENSG00000092529.25	CAPN3	chr15	+	42408470	42408774	42408210	42408324	42409302	42409380	49537	6,4	5,13	0,0	4,1	403	99	0.00117923346847	0.0326735381749	0.228,0.07	0.0,0.0	0.149
55137	ENSG00000249859.14	PVT1	chr8	+	128070159	128070272	128010317	128010444	128096517	128096654	55137	14,25	1,0	29,16	4,3	212	99	0.00117893203024	0.0326735381749	0.867,1.0	0.772,0.714	0.191
54468	ENSG00000284770.2	TBCE	chr1	+	235413875	235413997	235380018	235380149	235414432	235414618	54468	0,0	11,4	6,0	5,2	221	99	0.00118207139273	0.0326991726927	0.0,0.0	0.35,0.0	-0.175
15337	ENSG00000130340.17	SNX9	chr6	+	157876168	157876478	157875050	157875176	157896826	157896998	15337	15,16	153,133	1,4	133,86	409	99	0.00118452513907	0.0327175907505	0.023,0.028	0.002,0.011	0.019
23088	ENSG00000183569.18	SERHL2	chr22	+	42566303	42566338	42560185	42560265	42571120	42571203	23088	11,16	0,3	1,1	2,2	134	99	0.00118470297164	0.0327175907505	1.0,0.798	0.27,0.27	0.629
50112	ENSG00000138111.14	MFSD13A	chr10	+	102468752	102468842	102465980	102466087	102468954	102469197	50112	0,0	2,1	1,4	4,2	189	99	0.00118364509407	0.0327175907505	0.0,0.0	0.116,0.512	-0.314
61149	ENSG00000123349.15	PFDN5	chr12	+	53295838	53296275	53295478	53295639	53297849	53297924	61149	2235,2141	173,157	3968,3139	172,180	536	99	0.00118575448025	0.0327285278902	0.705,0.716	0.81,0.763	-0.076
6392	ENSG00000078674.19	PCM1	chr8	+	17924712	17924780	17922987	17923188	17935588	17935706	6392	106,138	0,2	103,80	5,5	167	99	0.00119639679995	0.0330040268609	1.0,0.976	0.924,0.905	0.073
14117	ENSG00000103245.14	CIAO3	chr16	-	740021	740103	739642	739738	740919	740997	14117	10,5	45,43	1,1	30,29	181	99	0.00120028140321	0.0330793331614	0.108,0.06	0.018,0.019	0.065
29693	ENSG00000108439.11	PNPO	chr17	+	47945597	47945612	47944615	47944715	47945860	47945989	29693	58,46	6,3	25,23	10,7	114	99	0.00120111415797	0.0330793331614	0.894,0.93	0.685,0.74	0.2
79924	ENSG00000076604.16	TRAF4	chr17	+	28744700	28744957	28744017	28744255	28747212	28747713	79924	36,38	91,59	26,14	107,68	356	99	0.00120091899886	0.0330793331614	0.099,0.152	0.063,0.054	0.067
49211	ENSG00000197892.13	KIF13B	chr8	-	29075280	29075343	29071619	29072316	29099132	29099241	49211	5,6	3,1	10,12	0,0	162	99	0.00120238014547	0.0330959443459	0.505,0.786	1.0,1.0	-0.355
40666	ENSG00000071054.17	MAP4K4	chr2	+	101863820	101864051	101860824	101860986	101864929	101865003	40666	149,141	468,467	49,34	92,52	330	99	0.00120435874524	0.033132141327	0.087,0.083	0.138,0.164	-0.066
55905	ENSG00000250337.9	PURPL	chr5	+	27477638	27477801	27475534	27475695	27484925	27485029	55905	84,97	4,4	79,52	11,10	262	99	0.00120997321146	0.0332682667519	0.888,0.902	0.731,0.663	0.198
33302	ENSG00000174842.17	GLMN	chr1	-	92266699	92266741	92266418	92266492	92267912	92268002	33302	43,31	7,6	40,52	1,2	141	99	0.00121458982939	0.0333768215582	0.812,0.784	0.966,0.948	-0.159
27722	ENSG00000164008.17	C1orf50	chr1	+	42773562	42773649	42767508	42767624	42774736	42774868	27722	48,50	0,0	71,38	6,1	186	99	0.00121586465918	0.0333934754112	1.0,1.0	0.863,0.953	0.092
39141	ENSG00000168137.20	SETD5	chr3	+	9436067	9436140	9435727	9435906	9436849	9436888	39141	6,5	3,14	0,1	4,4	172	99	0.00122453498067	0.0336131149642	0.535,0.171	0.0,0.126	0.29
5459	ENSG00000105223.21	PLD3	chr19	+	40365552	40365930	40348689	40348768	40366418	40366464	5459	546,490	85,82	415,360	110,94	477	99	0.00122527070683	0.0336148305839	0.571,0.554	0.439,0.443	0.121
70585	ENSG00000132950.19	ZMYM5	chr13	-	19837655	19837821	19835476	19835689	19851354	19852190	70585	28,26	1,4	25,25	0,0	265	99	0.00122680171517	0.0336198882767	0.913,0.708	1.0,1.0	-0.19
83140	ENSG00000105127.10	AKAP8	chr19	-	15369066	15369224	15368234	15368322	15370145	15370179	83140	23,44	59,59	18,10	70,51	257	99	0.00122625722235	0.0336198882767	0.131,0.223	0.09,0.07	0.097
48164	ENSG00000135541.22	AHI1	chr6	-	135301407	135301504	135300499	135300558	135302711	135302817	48164	1,0	0,2	2,1	0,0	196	99	0.00123264453447	0.0337429683392	1.0,0.0	1.0,1.0	-0.5
81083	ENSG00000154265.16	ABCA5	chr17	-	69317704	69317823	69314313	69314430	69325698	69325817	81083	9,13	17,19	5,0	19,17	218	99	0.00123236018915	0.0337429683392	0.194,0.237	0.107,0.0	0.162
14866	ENSG00000134769.23	DTNA	chr18	+	34829399	34829489	34827592	34827676	34848295	34848383	14866	8,5	53,30	0,0	9,13	189	99	0.0012367772634	0.0338190172721	0.073,0.08	0.0,0.0	0.076
23143	ENSG00000162604.12	TM2D1	chr1	-	61686791	61686921	61683451	61683546	61700933	61701025	23143	52,48	5,4	40,19	1,0	229	99	0.0012361008368	0.0338190172721	0.818,0.838	0.945,1.0	-0.144
641	ENSG00000067177.15	PHKA1	chrX	-	72620724	72620901	72619213	72619305	72623108	72623275	641	50,63	0,2	71,37	4,7	276	99	0.00124013243948	0.0338551409708	1.0,0.919	0.864,0.655	0.2
20453	ENSG00000018699.13	TTC27	chr2	+	32777881	32777980	32758291	32758519	32782625	32782678	20453	108,135	1,0	143,105	7,3	198	99	0.00123941889637	0.0338551409708	0.982,1.0	0.911,0.946	0.063
53258	ENSG00000143952.20	VPS54	chr2	-	63913824	63913925	63913222	63913310	63914181	63914287	53258	52,41	332,321	21,14	277,218	200	99	0.00124005397876	0.0338551409708	0.072,0.059	0.036,0.031	0.032
63955	ENSG00000165915.14	SLC39A13	chr11	+	47414776	47414905	47414424	47414475	47415059	47415159	63955	145,109	7,2	99,92	0,0	228	99	0.00124153140728	0.0338748113098	0.9,0.959	1.0,1.0	-0.071
20780	ENSG00000167202.12	TBC1D2B	chr15	-	77998502	77998900	77998243	77998355	78001618	78001666	20780	38,16	35,30	16,5	50,20	497	99	0.00124362405162	0.0339133765819	0.178,0.096	0.06,0.047	0.084
35768	ENSG00000106290.16	TAF6	chr7	-	100118517	100118649	100114053	100114231	100119203	100119238	35768	7,13	1,0	6,4	2,2	231	99	0.00125134467775	0.0341052899043	0.75,1.0	0.563,0.462	0.363
76241	ENSG00000008130.15	NADK	chr1	-	1756738	1756882	1756502	1756608	1757180	1757228	76241	25,13	104,87	5,18	177,122	243	99	0.00125214839739	0.034108576994	0.089,0.057	0.011,0.057	0.039
10246	ENSG00000149311.20	ATM	chr11	+	108224783	108224871	108224077	108224136	108227594	108227696	10246	4,9	0,5	1,1	0,0	187	99	0.00125393975656	0.0341387491738	1.0,0.488	1.0,1.0	-0.256
20081	ENSG00000143164.16	DCAF6	chr1	+	168022987	168023047	168004532	168004793	168038370	168038488	20081	86,70	56,58	35,34	57,45	159	99	0.00126051043699	0.0342820947214	0.489,0.429	0.277,0.32	0.16
77246	ENSG00000089685.15	BIRC5	chr17	+	78216663	78216781	78214679	78214789	78223464	78225635	77246	292,247	3,2	471,250	14,10	217	99	0.00126057811597	0.0342820947214	0.978,0.983	0.939,0.919	0.051
72572	ENSG00000196792.12	STRN3	chr14	-	30929200	30929311	30913523	30913657	30935162	30935304	72572	265,206	161,139	105,77	100,94	210	99	0.00126475906581	0.0343583704652	0.437,0.411	0.331,0.279	0.119
81433	ENSG00000183077.16	AFMID	chr17	+	78192636	78192785	78190969	78191060	78202498	78202603	81433	36,47	940,981	10,13	1212,981	248	99	0.00126444839438	0.0343583704652	0.015,0.019	0.003,0.005	0.013
28834	ENSG00000079150.19	FKBP7	chr2	-	178477061	178477213	178473028	178473142	178478278	178478317	28834	71,76	4,4	151,116	1,1	251	99	0.00126818030607	0.0344325779567	0.875,0.882	0.983,0.979	-0.102
13857	ENSG00000135913.11	USP37	chr2	-	218479649	218479715	218476839	218476981	218482069	218482234	13857	54,62	4,5	47,53	1,0	165	99	0.00126890348721	0.0344334891412	0.89,0.882	0.966,1.0	-0.097
33215	ENSG00000187741.16	FANCA	chr16	-	89762637	89762793	89762313	89762426	89764889	89765066	33215	6,11	0,0	11,8	1,3	255	99	0.00127110087547	0.0344743822993	1.0,1.0	0.81,0.509	0.341
29035	ENSG00000266258.1	LINC01909	chr18	+	70348971	70349114	70339799	70339881	70351978	70352119	29035	6,4	3,2	4,5	0,1	242	99	0.00127257041228	0.0344955012245	0.45,0.45	1.0,0.672	-0.386
39593	ENSG00000127328.22	RAB3IP	chr12	+	69812777	69812877	69801608	69801721	69812963	69813033	39593	87,70	0,0	58,32	3,3	199	99	0.00127412077759	0.0345187870569	1.0,1.0	0.906,0.841	0.127
15461	ENSG00000064933.19	PMS1	chr2	+	189785345	189785471	189784488	189784770	189791789	189791941	15461	3,3	0,1	1,1	1,1	225	99	0.00127962901757	0.034649217178	1.0,0.569	0.306,0.306	0.478
32397	ENSG00000163138.19	PACRGL	chr4	+	20701757	20701884	20700670	20700787	20702140	20702221	32397	2,5	1,0	0,1	2,0	226	99	0.0012805169757	0.0346544678123	0.467,1.0	0.0,1.0	0.234
34837	ENSG00000015532.10	XYLT2	chr17	+	50357056	50357252	50356510	50356773	50358206	50358540	34837	160,160	5,4	123,104	0,0	295	99	0.00128286930557	0.0346993213957	0.915,0.931	1.0,1.0	-0.077
34671	ENSG00000072803.18	FBXW11	chr5	-	171914342	171914405	171910571	171910797	171957596	171957698	34671	41,30	4,3	20,11	0,0	162	99	0.00128532315737	0.0347468709099	0.862,0.859	1.0,1.0	-0.139
10847	ENSG00000124615.20	MOCS1	chr6	-	39909039	39909102	39904164	39907117	39909834	39909955	10847	16,19	1,2	27,15	14,5	162	99	0.00128689855393	0.0347706340348	0.907,0.853	0.541,0.647	0.286
52773	ENSG00000164050.13	PLXNB1	chr3	-	48420223	48420257	48419576	48419674	48420664	48420773	52773	62,34	11,14	29,30	20,28	133	99	0.00129054269945	0.0348502366286	0.808,0.644	0.519,0.444	0.244
43577	ENSG00000111271.15	ACAD10	chr12	+	111747587	111747725	111747291	111747385	111748316	111748475	43577	16,13	80,52	1,5	53,41	237	99	0.00129821301814	0.0350384184912	0.077,0.095	0.008,0.048	0.058
70516	ENSG00000196387.10	ZNF140	chr12	+	133081272	133081329	133080821	133081072	133083102	133083229	70516	19,15	1,0	22,6	5,1	156	99	0.00130259966483	0.0351378194839	0.923,1.0	0.736,0.792	0.198
46654	ENSG00000154556.20	SORBS2	chr4	-	185638876	185639035	185630548	185630598	185646667	185646782	46654	33,29	42,57	11,14	70,32	258	99	0.0013041134876	0.0351596601238	0.232,0.163	0.057,0.144	0.097
46224	ENSG00000120942.14	UBIAD1	chr1	+	11285643	11285732	11273888	11274060	11294872	11296049	46224	51,73	4,4	95,42	0,1	188	99	0.00130725202382	0.0352062571744	0.87,0.906	1.0,0.957	-0.09
63117	ENSG00000151743.11	AMN1	chr12	-	31719217	31719356	31709292	31709425	31728990	31729121	63117	5,4	8,7	1,0	6,5	238	99	0.00130710319617	0.0352062571744	0.206,0.192	0.065,0.0	0.167
65437	ENSG00000159063.14	ALG8	chr11	-	78134027	78135347	78127357	78127436	78139493	78139611	65437	28,27	100,95	2,10	156,116	1419	99	0.00130852844342	0.0352216354223	0.019,0.019	0.001,0.006	0.015
38299	ENSG00000160200.18	CBS	chr21	-	43067777	43067960	43066242	43066377	43068508	43068615	38299	56,26	1,1	24,10	3,4	282	99	0.0013100432331	0.0352434098448	0.952,0.901	0.737,0.467	0.325
4747	ENSG00000170949.18	ZNF160	chr19	-	53091412	53091497	53086261	53086321	53091636	53091720	4747	25,19	5,6	7,6	11,5	184	99	0.00131607786799	0.0353866903751	0.729,0.63	0.255,0.392	0.356
59344	ENSG00000120868.14	APAF1	chr12	+	98703370	98703499	98699407	98699569	98706484	98706610	59344	46,59	9,8	38,21	18,11	228	99	0.00131756399238	0.035407582187	0.689,0.762	0.478,0.453	0.26
82123	ENSG00000187118.14	CMC1	chr3	+	28316752	28316859	28316352	28316423	28319508	28319776	82123	18,10	179,240	5,3	222,168	206	99	0.00132164429798	0.0354981288017	0.046,0.02	0.011,0.009	0.023
51859	ENSG00000113924.12	HGD	chr3	-	120644318	120644443	120641588	120641693	120646266	120646335	51859	682,713	14,8	1126,807	4,5	224	99	0.00132464686742	0.0355405388163	0.956,0.975	0.992,0.986	-0.023
63994	ENSG00000096093.16	EFHC1	chr6	+	52423686	52423828	52420344	52420473	52423945	52424167	63994	7,6	26,36	1,0	28,5	241	99	0.0013239478648	0.0355405388163	0.1,0.064	0.014,0.0	0.075
43676	ENSG00000106384.12	MOGAT3	chr7	-	101198625	101198830	101195896	101196389	101200233	101200304	43676	220,207	2,0	232,158	5,6	304	99	0.0013270911689	0.0355869973976	0.973,1.0	0.938,0.896	0.069
53087	ENSG00000164182.12	NDUFAF2	chr5	+	61073124	61073214	60945204	60945382	61152703	61153026	53087	175,149	10,0	238,163	0,0	189	99	0.00133327189671	0.0357335475441	0.902,1.0	1.0,1.0	-0.049
560	ENSG00000131174.7	COX7B	chrX	+	77902649	77902767	77899484	77899593	77905183	77905461	560	637,623	16,14	1029,820	4,12	217	99	0.001334152576	0.0357379679572	0.948,0.953	0.992,0.969	-0.03
65275	ENSG00000166435.16	XRRA1	chr11	-	74927390	74927488	74921213	74921347	74930299	74930372	65275	14,32	1,1	16,14	5,4	197	99	0.00133588444553	0.0357651722519	0.876,0.941	0.617,0.638	0.281
66710	ENSG00000150433.10	TMEM218	chr11	-	125102131	125102302	125101200	125101303	125102733	125102809	66710	15,21	0,0	15,8	2,2	270	99	0.00133880813985	0.0358242386017	1.0,1.0	0.733,0.595	0.336
1896	ENSG00000198089.16	SFI1	chr22	+	31528689	31528863	31508254	31508376	31546860	31546971	1896	38,73	4,2	24,38	0,0	273	99	0.00134368356686	0.0359354387664	0.775,0.93	1.0,1.0	-0.147
46237	ENSG00000224189.8	HAGLR	chr2	-	176176898	176176939	176175772	176176692	176177331	176177494	46237	6,8	136,93	1,2	188,135	140	99	0.00134543164697	0.0359629269619	0.03,0.057	0.004,0.01	0.036
39571	ENSG00000007341.19	ST7L	chr1	-	112616812	112616844	112610840	112611003	112618908	112619189	39571	15,10	9,7	11,6	2,0	131	99	0.00134719889311	0.0359908977699	0.557,0.519	0.806,1.0	-0.365
26963	ENSG00000131374.15	TBC1D5	chr3	-	17576413	17576549	17508473	17508605	17586352	17586466	26963	1,4	3,2	0,0	5,2	235	99	0.00134925074989	0.036026438071	0.123,0.457	0.0,0.0	0.29
34559	ENSG00000078369.18	GNB1	chr1	-	1839628	1839682	1839189	1839238	1890363	1890401	34559	5,4	0,9	3,8	0,0	153	99	0.00135366397284	0.0361112618087	1.0,0.223	1.0,1.0	-0.388
76935	ENSG00000258867.8	LINC01146	chr14	+	88037350	88037439	88025406	88025481	88044685	88044848	76935	12,13	3,9	4,6	1,0	188	99	0.00135387398822	0.0361112618087	0.678,0.432	0.678,1.0	-0.284
66333	ENSG00000110245.12	APOC3	chr11	+	116830492	116830637	116829914	116829940	116830772	116830896	66333	4985,4824	69,67	11510,9071	258,187	244	99	0.00135649099407	0.0361617468366	0.967,0.967	0.948,0.952	0.017
50304	ENSG00000064607.17	SUGP2	chr19	-	18993647	18993740	18990889	18991149	18994365	18995280	50304	41,47	26,23	49,50	13,5	192	99	0.00135756262976	0.0361677968997	0.448,0.513	0.66,0.838	-0.268
60791	ENSG00000088448.14	ANKRD10	chr13	-	110894108	110894202	110892691	110893263	110906032	110906124	60791	17,21	46,37	11,21	122,67	193	99	0.00135816665372	0.0361677968997	0.159,0.225	0.044,0.139	0.101
57042	ENSG00000255036.6	SUGT1P4-STRA6LP-CCDC180	chr9	+	97291370	97291487	97290853	97290902	97307735	97307806	57042	6,7	6,0	2,6	0,0	216	99	0.00136033577908	0.0362062504186	0.314,1.0	1.0,1.0	-0.343
37685	ENSG00000225210.10	DUXAP9	chr14	+	19065967	19066115	19062359	19062466	19066235	19066347	37685	57,63	6,3	35,22	10,7	247	99	0.00136877348129	0.0364114164594	0.792,0.894	0.584,0.557	0.272
32809	ENSG00000101391.21	CDK5RAP1	chr20	-	33396760	33396936	33395012	33395116	33401427	33401517	32809	197,140	5,4	169,116	0,0	275	99	0.00137059527279	0.036440464625	0.934,0.926	1.0,1.0	-0.07
44594	ENSG00000136717.15	BIN1	chr2	-	127051153	127051243	127050801	127050912	127057472	127057601	44594	6,4	0,0	1,0	0,2	189	99	0.00137496212671	0.0365371122665	1.0,1.0	1.0,0.0	0.5
14358	ENSG00000268043.9	NBPF12	chr1	+	146949323	146949422	146943290	146943562	146951347	146951489	14358	6,7	2,0	2,0	1,2	198	99	0.00137589186235	0.0365423705207	0.6,1.0	0.5,0.0	0.55
40646	ENSG00000103254.10	ANTKMT	chr16	+	722083	722134	721800	721941	722308	722590	40646	14,8	5,2	15,4	0,1	150	99	0.00138486794178	0.036722167393	0.649,0.725	1.0,0.725	-0.175
67461	ENSG00000032742.18	IFT88	chr13	+	20589810	20589867	20582956	20583019	20590966	20591020	67461	60,47	5,0	46,18	7,8	156	99	0.00138429486358	0.036722167393	0.884,1.0	0.807,0.588	0.244
78445	ENSG00000157353.17	FCSK	chr16	+	70469151	70469323	70468848	70468968	70470313	70470426	78445	73,71	6,3	36,50	0,1	271	99	0.00138376108536	0.036722167393	0.816,0.896	1.0,0.948	-0.118
36548	ENSG00000146776.15	ATXN7L1	chr7	-	105639486	105639569	105638352	105638609	105642837	105643121	36548	22,15	5,3	13,9	0,1	182	99	0.00138600345908	0.0367327700187	0.705,0.731	1.0,0.83	-0.197
60884	ENSG00000151224.13	MAT1A	chr10	-	80283915	80284038	80280679	80280792	80285511	80285589	60884	337,372	14,14	432,297	34,28	222	99	0.00139298699178	0.0368939889524	0.915,0.922	0.85,0.825	0.081
78767	ENSG00000231312.8	MAP4K3-DT	chr2	+	39646261	39646390	39518638	39518710	39665086	39665343	78767	42,48	3,4	8,2	0,0	228	99	0.00139356438213	0.0368939889524	0.859,0.839	1.0,1.0	-0.151
1273	ENSG00000046651.16	OFD1	chrX	+	13744911	13745139	13744414	13744519	13746318	13746455	1273	7,7	37,44	0,0	27,17	327	99	0.00139621437481	0.0369249893796	0.054,0.046	0.0,0.0	0.05
22607	ENSG00000198814.14	GK	chrX	+	30674301	30674466	30665510	30665584	30677374	30677452	22607	16,10	4,5	4,5	12,6	264	99	0.00139602115566	0.0369249893796	0.6,0.429	0.111,0.238	0.34
35026	ENSG00000126214.22	KLC1	chr14	+	103684985	103685036	103679308	103679518	103687080	103687211	35026	15,13	22,16	5,3	17,24	150	99	0.0014033598597	0.037071382481	0.31,0.349	0.163,0.076	0.21
44009	ENSG00000114861.24	FOXP1	chr3	-	71335159	71335277	71299819	71299880	71359149	71359244	44009	8,6	10,17	0,1	13,1	217	99	0.00140330059047	0.037071382481	0.267,0.139	0.0,0.313	0.047
72940	ENSG00000100523.16	DDHD1	chr14	-	53096116	53096218	53093315	53093444	53103682	53103856	72940	3,7	24,22	0,0	8,4	201	99	0.00140397717393	0.037071382481	0.058,0.135	0.0,0.0	0.097
83199	ENSG00000130304.17	SLC27A1	chr19	+	17483881	17484121	17470488	17470707	17486562	17486957	83199	7,2	0,0	5,2	1,2	339	99	0.00140496188438	0.0370777758187	1.0,1.0	0.594,0.226	0.59
42867	ENSG00000150455.15	TIRAP	chr11	+	126288442	126288573	126283105	126283153	126289664	126289833	42867	2,2	4,1	4,1	1,0	230	99	0.00140810777939	0.0371215573034	0.177,0.463	0.633,1.0	-0.496
50216	ENSG00000160799.12	CCDC12	chr3	-	46976937	46977040	46976636	46976843	46979473	46979561	50216	5,1	1,0	1,4	1,3	202	99	0.00140760475129	0.0371215573034	0.71,1.0	0.329,0.395	0.493
16277	ENSG00000157259.8	GATAD1	chr7	+	92449091	92449213	92448751	92448877	92450700	92450760	16277	21,35	67,83	7,10	79,38	221	99	0.00140974398864	0.0371450802622	0.123,0.159	0.038,0.105	0.07
8320	ENSG00000106078.19	COBL	chr7	-	51172455	51172530	51136157	51136331	51184101	51184199	8320	7,14	22,21	2,5	39,22	174	99	0.00141280288268	0.0371864315947	0.153,0.275	0.028,0.115	0.143
54148	ENSG00000133026.14	MYH10	chr17	-	8576642	8576672	8569719	8569812	8577235	8577338	54148	13,19	124,122	6,2	113,76	129	99	0.00141246548747	0.0371864315947	0.074,0.107	0.039,0.02	0.061
40673	ENSG00000259153.4	MAP3K9-DT	chr14	+	70810746	70811062	70809941	70810665	70815110	70815391	40673	22,16	11,8	2,2	7,3	415	99	0.00141392921053	0.037196469658	0.323,0.323	0.064,0.137	0.223
53407	ENSG00000073792.16	IGF2BP2	chr3	-	185693176	185693228	185692698	185692762	185696611	185696663	53407	16,37	438,325	14,9	405,342	151	99	0.00142072167485	0.037355478645	0.023,0.069	0.022,0.017	0.026
35087	ENSG00000223745.8	CCDC18-AS1	chr1	-	93324634	93324729	93305110	93305470	93337376	93337392	35087	8,7	3,1	4,7	0,0	194	99	0.00142377052213	0.0374159399687	0.576,0.781	1.0,1.0	-0.322
24414	ENSG00000100889.12	PCK2	chr14	+	24094765	24094845	24094280	24094434	24098202	24098387	24414	5,3	1,0	5,2	3,1	179	99	0.00142742653784	0.0374725733233	0.734,1.0	0.48,0.525	0.365
29128	ENSG00000108960.9	MMD	chr17	-	55407745	55407820	55403766	55403868	55411256	55411417	29128	829,895	26,11	971,641	41,29	174	99	0.00142676933765	0.0374725733233	0.948,0.979	0.931,0.926	0.035
23500	ENSG00000162650.17	ATXN7L2	chr1	+	109492026	109492104	109490921	109491717	109492585	109492734	23500	2,4	6,9	0,0	7,3	177	99	0.00142974218916	0.0375136401718	0.157,0.199	0.0,0.0	0.178
76563	ENSG00000103148.17	NPRL3	chr16	-	130521	130591	119125	119255	138149	138334	76563	75,85	4,1	68,41	11,4	169	99	0.00143435527411	0.0376149123905	0.917,0.98	0.784,0.857	0.128
6898	ENSG00000178826.11	TMEM139	chr7	+	143285344	143285445	143284950	143284974	143286423	143286862	6898	9,3	7,4	22,21	4,3	200	99	0.00143553003699	0.0376259581506	0.389,0.271	0.731,0.776	-0.424
16886	ENSG00000145782.13	ATG12	chr5	-	115840496	115840612	115837627	115837764	115841389	115841837	16886	28,35	98,89	15,11	101,75	215	99	0.00143869290079	0.0376693105555	0.116,0.153	0.064,0.063	0.071
68114	ENSG00000181038.14	METTL23	chr17	+	76729689	76729794	76726829	76726879	76732977	76733215	68114	125,133	0,5	138,90	6,12	204	99	0.00143827885486	0.0376693105555	1.0,0.928	0.918,0.784	0.113
67986	ENSG00000137492.9	THAP12	chr11	-	76355559	76355654	76350060	76352794	76360955	76361063	67986	68,53	0,1	29,31	5,1	194	99	0.00144273655316	0.0377553872305	1.0,0.964	0.747,0.941	0.138
25219	ENSG00000163719.20	MTMR14	chr3	+	9650327	9650529	9649518	9649742	9662266	9662375	25219	2,2	0,1	2,0	1,2	301	99	0.00144675350299	0.0378406753053	1.0,0.397	0.397,0.0	0.5
72002	ENSG00000156222.12	SLC28A1	chr15	+	84886671	84886787	84884653	84884751	84887744	84887856	72002	99,87	21,25	126,109	67,50	215	99	0.0014515814611	0.0379332825088	0.685,0.616	0.464,0.501	0.168
74118	ENSG00000198752.11	CDC42BPB	chr14	-	102954197	102954275	102952497	102952603	102954601	102954688	74118	118,96	36,40	45,41	41,26	177	99	0.0014518135602	0.0379332825088	0.647,0.573	0.38,0.469	0.185
62499	ENSG00000174915.12	PTDSS2	chr11	+	451351	451493	450450	450637	460186	460288	62499	7,4	42,26	1,1	60,34	241	99	0.00145377049112	0.0379645472762	0.064,0.059	0.007,0.012	0.052
15668	ENSG00000115875.19	SRSF7	chr2	-	38748897	38749346	38748578	38748653	38749528	38749705	15668	520,521	226,241	384,316	267,207	548	99	0.00145507500353	0.0379787506541	0.294,0.281	0.206,0.216	0.076
55557	ENSG00000180900.20	SCRIB	chr8	-	143791665	143791740	143791388	143791440	143791875	143791913	55557	25,43	13,8	11,14	16,15	174	99	0.00145823177905	0.038021394757	0.522,0.754	0.281,0.347	0.324
79028	ENSG00000197912.16	SPG7	chr16	+	89548979	89549336	89548002	89548113	89550493	89550609	79028	87,58	216,169	34,19	135,128	456	99	0.001458205554	0.038021394757	0.08,0.069	0.052,0.031	0.033
13483	ENSG00000006837.12	CDKL3	chr5	-	134321790	134321903	134308000	134308466	134370997	134371004	13483	17,28	3,2	23,13	0,0	212	99	0.0014594161214	0.0380242185887	0.726,0.867	1.0,1.0	-0.204
16292	ENSG00000104660.19	LEPROTL1	chr8	+	30132374	30132489	30104299	30104486	30137271	30137697	16292	1,8	1,0	5,4	8,5	214	99	0.00145986315184	0.0380242185887	0.316,1.0	0.224,0.27	0.411
71003	ENSG00000129353.15	SLC44A2	chr19	+	10642896	10643021	10642366	10642451	10643278	10644130	71003	7,4	17,18	3,1	48,27	224	99	0.00146086212553	0.0380303997862	0.154,0.089	0.027,0.016	0.1
37028	ENSG00000176261.16	ZBTB8OS	chr1	-	32633950	32634110	32627507	32627544	32650432	32650903	37028	80,83	4,7	76,65	17,12	259	99	0.00146265930807	0.0380395671021	0.884,0.819	0.631,0.674	0.199
51526	ENSG00000163864.17	NMNAT3	chr3	-	139575582	139575994	139573597	139573680	139578871	139579055	51526	4,8	4,8	2,0	7,7	511	99	0.0014627379551	0.0380395671021	0.162,0.162	0.052,0.0	0.136
10374	ENSG00000230490.4	ENSG00000230490	chr13	-	33663885	33664137	33661276	33661343	33676677	33676796	10374	15,28	6,1	31,16	0,1	351	99	0.00146458777422	0.0380678459941	0.414,0.888	1.0,0.819	-0.258
32167	ENSG00000113161.17	HMGCR	chr5	+	75355055	75355214	75354502	75354697	75355364	75355522	32167	2368,2096	12,10	1825,1264	16,21	258	99	0.00146567089808	0.0380761777378	0.987,0.988	0.978,0.958	0.02
46698	ENSG00000259471.1	LINC01169	chr15	+	66664361	66664452	66582189	66582248	66668340	66668454	46698	47,53	0,3	17,29	5,4	190	99	0.00146839902511	0.0381272135844	1.0,0.902	0.639,0.791	0.236
26407	ENSG00000174990.8	CA5A	chr16	-	87901911	87901974	87891798	87891954	87926747	87926945	26407	14,13	10,9	40,30	6,7	162	99	0.00147558912001	0.0382740988838	0.461,0.469	0.803,0.724	-0.299
54260	ENSG00000156170.14	NDUFAF6	chr8	+	95036370	95036494	95035453	95035576	95041569	95041626	54260	23,14	30,39	8,5	37,39	223	99	0.00147536942697	0.0382740988838	0.254,0.137	0.088,0.054	0.125
81138	ENSG00000227036.10	LINC00511	chr17	-	72420699	72420964	72403321	72404816	72422784	72423108	81138	84,131	11,6	117,64	2,1	364	99	0.00147655957144	0.0382793852345	0.675,0.856	0.941,0.946	-0.178
24889	ENSG00000101974.15	ATP11C	chrX	-	139731650	139731755	139726347	139728962	139737915	139738069	24889	49,53	7,9	28,34	1,1	204	99	0.00147957088097	0.0383181971498	0.773,0.741	0.931,0.943	-0.18
43858	ENSG00000143891.17	GALM	chr2	+	38698365	38698436	38689812	38689894	38729555	38729697	43858	10,18	227,248	13,4	454,349	170	99	0.00147959151839	0.0383181971498	0.025,0.041	0.016,0.007	0.022
20174	ENSG00000116001.17	TIA1	chr2	-	70228343	70228462	70227734	70227822	70229058	70229091	20174	111,92	102,85	97,38	131,91	218	99	0.00148056439346	0.0383235151529	0.331,0.33	0.252,0.159	0.125
30505	ENSG00000136100.14	VPS36	chr13	-	52417436	52417679	52417056	52417141	52417991	52418056	30505	7,9	54,57	1,0	41,43	342	99	0.00148193288289	0.038339062578	0.036,0.044	0.007,0.0	0.036
20202	ENSG00000138075.14	ABCG5	chr2	-	43826381	43826521	43824218	43824432	43827982	43828115	20202	129,149	4,10	72,41	8,15	239	99	0.00148345603894	0.0383585932058	0.93,0.861	0.788,0.531	0.236
77755	ENSG00000166743.10	ACSM1	chr16	-	20669826	20669990	20661793	20661873	20671530	20671671	77755	12,23	1,0	7,6	1,3	263	99	0.00149031971127	0.0385161250018	0.819,1.0	0.725,0.43	0.332
70812	ENSG00000088305.19	DNMT3B	chr20	+	32805337	32805407	32802384	32802470	32806208	32806327	70812	1,3	1,3	0,0	1,1	169	99	0.00149175950636	0.0385333905391	0.369,0.369	0.0,0.0	0.369
65773	ENSG00000182919.15	C11orf54	chr11	+	93741962	93742094	93741658	93741728	93747301	93747448	65773	30,33	25,29	15,7	27,24	231	99	0.00149580382747	0.0386178805116	0.34,0.328	0.192,0.111	0.183
78598	ENSG00000103091.15	WDR59	chr16	-	74903946	74904100	74893678	74893812	74908907	74908977	78598	719,683	22,14	485,420	4,4	253	99	0.00149730722361	0.0386367167866	0.927,0.95	0.979,0.976	-0.039
26451	ENSG00000143537.14	ADAM15	chr1	+	155061414	155061489	155060762	155060832	155061903	155061975	26451	3,0	2,2	14,5	0,2	174	99	0.00150737526502	0.0388764227054	0.46,0.0	1.0,0.587	-0.564
3977	ENSG00000282826.4	FRG1CP	chr20	-	28601656	28601839	28600391	28600461	28602608	28602732	3977	180,181	122,102	117,96	117,103	282	99	0.00151454314143	0.0390314112207	0.341,0.384	0.26,0.247	0.109
53293	ENSG00000111711.10	GOLT1B	chr12	+	21507943	21508109	21506884	21506976	21508382	21508561	53293	26,18	59,50	17,6	82,61	265	99	0.00151494812733	0.0390314112207	0.141,0.119	0.072,0.035	0.077
75105	ENSG00000171766.17	GATM	chr15	-	45380483	45380559	45376608	45376819	45396921	45397082	75105	0,3	49,45	4,8	36,33	175	99	0.00151667105861	0.0390556485959	0.0,0.036	0.059,0.121	-0.072
42510	ENSG00000198001.16	IRAK4	chr12	+	43761571	43761810	43760241	43760972	43768102	43768272	42510	1,5	3,5	0,0	1,1	338	99	0.0015231882002	0.0392032525898	0.089,0.227	0.0,0.0	0.158
43660	ENSG00000147996.17	CBWD5	chr9	+	65693385	65693473	65692570	65692608	65698514	65698561	43660	21,30	7,12	25,11	21,25	187	99	0.00153046278408	0.0393701892179	0.614,0.57	0.387,0.189	0.304
70056	ENSG00000176834.14	VSIG10	chr12	-	118102988	118103170	118095532	118095814	118103592	118103862	70056	36,27	0,2	37,11	6,3	281	99	0.00153155750188	0.0393780626294	1.0,0.826	0.685,0.564	0.288
3746	ENSG00000088367.23	EPB41L1	chr20	+	36214356	36214440	36212271	36212376	36218875	36218962	3746	183,164	142,139	94,75	131,98	183	99	0.00153483286529	0.0394419659273	0.411,0.39	0.28,0.293	0.114
5042	ENSG00000105483.18	CARD8	chr19	-	48223718	48223868	48221729	48221855	48230437	48230498	5042	7,6	36,28	10,10	16,7	249	99	0.00153776950588	0.0394790264876	0.072,0.079	0.199,0.362	-0.205
22015	ENSG00000153827.14	TRIP12	chr2	-	229860405	229860531	229858771	229859574	229879981	229880128	22015	268,277	36,44	179,94	47,29	225	99	0.00153857822793	0.0394790264876	0.766,0.735	0.626,0.588	0.143
44970	ENSG00000153237.18	CCDC148	chr2	-	158340597	158340680	158338989	158339085	158358448	158358570	44970	1,1	0,0	1,0	0,2	182	99	0.00154022838713	0.0394790264876	1.0,1.0	1.0,0.0	0.5
54312	ENSG00000196636.8	SDHAF3	chr7	+	97136387	97136467	97117722	97117897	97142672	97142835	54312	9,2	0,0	5,1	5,0	179	99	0.00154020304945	0.0394790264876	1.0,1.0	0.356,1.0	0.322
62414	ENSG00000148803.12	FUOM	chr10	-	133357186	133357255	133356942	133357013	133357922	133358019	62414	124,92	0,0	78,46	2,5	168	99	0.00153975474144	0.0394790264876	1.0,1.0	0.958,0.844	0.099
62963	ENSG00000102882.12	MAPK3	chr16	-	30117136	30117285	30116893	30117003	30117669	30117784	62963	803,763	2,4	761,497	14,5	248	99	0.0015411974149	0.0394835957534	0.994,0.987	0.956,0.975	0.025
14014	ENSG00000197343.11	ZNF655	chr7	+	99561887	99561973	99560506	99560695	99562367	99562494	14014	48,54	5,7	37,17	13,9	185	99	0.0015439211595	0.039533090982	0.837,0.805	0.604,0.503	0.267
14815	ENSG00000177058.12	SLC38A9	chr5	-	55627890	55627980	55625844	55626659	55633753	55633902	14815	84,86	3,0	85,85	8,6	189	99	0.00154628808241	0.0395531302473	0.936,1.0	0.848,0.881	0.103
44672	ENSG00000115718.18	PROC	chr2	+	127419925	127420012	127418426	127418492	127421282	127421449	44672	1198,1202	5,5	918,813	14,11	186	99	0.00154553016038	0.0395531302473	0.992,0.992	0.972,0.975	0.018
14470	ENSG00000012048.24	BRCA1	chr17	-	43110464	43110580	43106455	43106533	43115725	43115779	14470	0,0	16,13	0,7	9,17	215	99	0.0015474790151	0.0395633255007	0.0,0.0	0.0,0.159	-0.08
368	ENSG00000122121.12	XPNPEP2	chrX	+	129742107	129742181	129738948	129739262	129743960	129744071	368	51,28	0,0	33,32	0,6	173	99	0.00155336019607	0.039690359774	1.0,1.0	1.0,0.753	0.123
23675	ENSG00000169660.17	HEXD	chr17	+	82440262	82440334	82439630	82439713	82440996	82441075	23675	8,3	24,14	0,3	30,32	171	99	0.00155641930933	0.039690359774	0.162,0.11	0.0,0.051	0.111
34529	ENSG00000061936.10	SFSWAP	chr12	+	131785072	131785228	131778064	131778330	131786462	131786588	34529	13,7	71,55	1,2	36,43	255	99	0.00155643895827	0.039690359774	0.066,0.047	0.011,0.018	0.042
41931	ENSG00000114744.9	COMMD2	chr3	-	149750256	149750382	149741389	149741718	149750677	149750851	41931	16,13	111,101	8,3	138,100	225	99	0.00155635826127	0.039690359774	0.06,0.054	0.025,0.013	0.038
50626	ENSG00000197857.16	ZNF44	chr19	-	12291219	12291250	12275955	12276082	12293231	12293375	50626	2,3	1,0	5,1	4,1	130	99	0.00155444645306	0.039690359774	0.604,1.0	0.488,0.432	0.342
70456	ENSG00000088833.18	NSFL1C	chr20	-	1463334	1463441	1458199	1458274	1464328	1464426	70456	23,17	254,214	9,7	240,236	206	99	0.00155721725576	0.039690359774	0.042,0.037	0.018,0.014	0.024
43172	ENSG00000285219.4	HULC	chr6	+	8469990	8470132	8437939	8438031	8558584	8558643	43172	6,2	3,1	0,1	1,1	241	99	0.00155804324304	0.0396911516164	0.451,0.451	0.0,0.291	0.305
14018	ENSG00000197343.11	ZNF655	chr7	+	99562367	99562494	99560532	99560695	99563862	99564705	14018	54,69	28,31	63,53	14,9	226	99	0.00156207680102	0.0397736138459	0.458,0.494	0.663,0.721	-0.216
47022	ENSG00000003393.16	ALS2	chr2	-	201719985	201720128	201718076	201718210	201723042	201723120	47022	13,7	80,80	1,2	57,47	242	99	0.00156368933701	0.0397943793508	0.062,0.035	0.007,0.017	0.037
65389	ENSG00000158423.17	RIBC1	chrX	+	53428282	53428627	53428002	53428084	53429853	53429972	65389	6,4	1,0	5,2	3,1	444	99	0.00157004814247	0.0399268271993	0.572,1.0	0.271,0.308	0.497
81699	ENSG00000011243.19	AKAP8L	chr19	-	15399831	15399984	15399301	15399410	15400294	15400358	81699	31,24	279,149	14,14	262,217	252	99	0.0015704930528	0.0399268271993	0.042,0.06	0.021,0.025	0.028
46464	ENSG00000248161.5	ENSG00000248161	chr4	-	102419696	102419794	102419263	102419359	102431061	102431249	46464	1,2	0,0	1,1	1,1	197	99	0.00157273267653	0.0399430901688	1.0,1.0	0.334,0.334	0.666
82712	ENSG00000178078.12	STAP2	chr19	-	4324454	4324664	4324043	4324197	4325215	4325308	82712	186,164	1,4	222,130	12,7	309	99	0.00157254737771	0.0399430901688	0.983,0.929	0.856,0.856	0.1
18677	ENSG00000221817.12	PPP3CB-AS1	chr10	+	73498649	73498867	73496141	73496906	73499594	73499687	18677	35,26	0,1	20,16	1,4	317	99	0.00157371534074	0.0399477278487	1.0,0.89	0.862,0.555	0.237
15650	ENSG00000037474.15	NSUN2	chr5	-	6621602	6621744	6620115	6620298	6623213	6623285	15650	5,3	3,4	1,0	3,2	241	99	0.00157906184059	0.0400427307072	0.406,0.236	0.12,0.0	0.261
54249	ENSG00000156170.14	NDUFAF6	chr8	+	94975856	94975979	94957994	94958179	94980854	94980973	54249	10,12	2,2	5,8	0,0	222	99	0.00157833141153	0.0400427307072	0.69,0.728	1.0,1.0	-0.291
80429	ENSG00000141699.11	RETREG3	chr17	-	42596532	42596627	42592055	42592162	42609085	42609324	80429	9,11	74,67	4,2	94,65	194	99	0.00158059919101	0.0400613696479	0.058,0.077	0.021,0.015	0.05
24304	ENSG00000079689.14	SCGN	chr6	+	25681950	25682006	25669998	25670076	25689171	25689217	24304	79,89	6,4	83,49	0,1	155	99	0.00158231523428	0.0400845164702	0.894,0.934	1.0,0.969	-0.07
79021	ENSG00000197912.16	SPG7	chr16	+	89545871	89546181	89542983	89544772	89546657	89546760	79021	48,55	187,218	18,18	160,122	409	99	0.00158447187699	0.040118795786	0.058,0.058	0.027,0.034	0.028
45350	ENSG00000141127.15	PRPSAP2	chr17	+	18865468	18865564	18856341	18856476	18865801	18865900	45350	114,83	1,1	104,65	4,6	195	99	0.00159718861829	0.0404202863152	0.983,0.977	0.93,0.846	0.092
8092	ENSG00000067601.10	PMS2P4	chr7	-	67264048	67264250	67232649	67232722	67292462	67292549	8092	4,3	1,6	0,1	3,5	301	99	0.00159958894261	0.0404523570168	0.568,0.141	0.0,0.062	0.324
60861	ENSG00000138674.17	SEC31A	chr4	-	82830936	82830975	82828999	82829058	82844385	82844460	60861	113,130	15,12	184,120	41,32	138	99	0.00160007620733	0.0404523570168	0.844,0.886	0.763,0.729	0.119
62551	ENSG00000132600.18	PRMT7	chr16	+	68356029	68356215	68355722	68355883	68356700	68356797	62551	12,15	48,32	4,1	36,18	285	99	0.0016033880439	0.0405155710627	0.08,0.14	0.037,0.019	0.082
18234	ENSG00000203546.7	ENSG00000203546	chr14	-	31428143	31428188	31402849	31403049	31453274	31453344	18234	6,12	0,5	1,4	0,0	144	99	0.00161173180071	0.0406236146094	1.0,0.623	1.0,1.0	-0.189
35213	ENSG00000173653.8	RCE1	chr11	+	66845499	66845562	66845165	66845237	66845859	66846528	35213	94,88	3,7	95,83	12,18	162	99	0.00161107720556	0.0406236146094	0.95,0.885	0.829,0.738	0.134
49579	ENSG00000163512.14	AZI2	chr3	-	28341511	28341596	28340401	28340622	28348600	28348790	49579	9,5	80,72	1,1	75,74	184	99	0.00161033189747	0.0406236146094	0.057,0.036	0.007,0.007	0.04
55740	ENSG00000015475.19	BID	chr22	-	17750104	17750174	17739348	17739488	17774380	17774412	55740	14,6	8,4	11,9	0,2	169	99	0.00160970920426	0.0406236146094	0.506,0.468	1.0,0.725	-0.376
81026	ENSG00000196646.12	ZNF136	chr19	+	12169281	12169391	12163063	12163206	12185784	12185911	81026	1,0	19,17	3,4	9,14	209	99	0.00160960632462	0.0406236146094	0.024,0.0	0.136,0.119	-0.116
69309	ENSG00000186470.14	BTN3A2	chr6	+	26368182	26368267	26367974	26368050	26368564	26368912	69309	68,47	2,4	40,13	9,4	184	99	0.00161792942351	0.0407592502751	0.948,0.863	0.705,0.636	0.235
63687	ENSG00000111203.13	ITFG2	chr12	+	2840841	2840995	2836744	2836956	2858011	2858331	63687	9,9	0,0	10,9	0,5	253	99	0.00162059696492	0.0408058633663	1.0,1.0	1.0,0.413	0.293
17708	ENSG00000145833.16	DDX46	chr5	+	134790105	134790222	134788512	134788591	134790469	134790552	17708	29,38	92,97	18,16	120,88	216	99	0.00162216097736	0.0408246571374	0.126,0.152	0.064,0.077	0.069
66715	ENSG00000150433.10	TMEM218	chr11	-	125102131	125102351	125101200	125101303	125102733	125102809	66715	20,33	0,0	20,13	2,2	319	99	0.00162447699389	0.040862348001	1.0,1.0	0.756,0.669	0.287
38458	ENSG00000121940.17	CLCC1	chr1	-	108947337	108947508	108943835	108944057	108947610	108947718	38458	10,12	31,44	7,0	44,42	270	99	0.00162796919847	0.0409295720286	0.106,0.091	0.055,0.0	0.071
55768	ENSG00000234231.4	ANAPC1P4	chr2	+	87705904	87705970	87704332	87704600	87707761	87707910	55768	2,7	11,8	1,0	5,8	165	99	0.00162935399309	0.0409437716301	0.098,0.344	0.107,0.0	0.167
72867	ENSG00000165525.18	NEMF	chr14	-	49833422	49833496	49832206	49832277	49834362	49834449	72867	60,76	7,3	40,38	1,0	173	99	0.00163902087029	0.0411659713654	0.831,0.935	0.958,1.0	-0.096
39221	ENSG00000119185.13	ITGB1BP1	chr2	-	9419989	9420100	9418625	9418732	9423372	9423480	39221	34,44	130,120	27,26	190,148	210	99	0.00164604149358	0.0413007526713	0.11,0.147	0.063,0.076	0.059
61519	ENSG00000226009.3	KCNIP2-AS1	chr10	+	101827859	101827939	101818772	101819248	101828180	101828885	61519	3,8	1,0	7,2	2,3	179	99	0.00164528075929	0.0413007526713	0.624,1.0	0.659,0.269	0.348
67741	ENSG00000064102.15	INTS13	chr12	-	26937657	26937809	26936578	26936814	26938267	26938304	67741	1,2	1,0	1,0	2,4	251	99	0.00164862070208	0.0413446912484	0.283,1.0	0.165,0.0	0.559
40900	ENSG00000143437.21	ARNT	chr1	-	150842423	150842468	150839398	150839654	150846262	150846307	40900	69,66	28,40	78,65	10,18	144	99	0.00165085507356	0.041379479929	0.629,0.531	0.843,0.713	-0.198
78740	ENSG00000231312.8	MAP4K3-DT	chr2	+	39474526	39474627	39454296	39454365	39516413	39516541	78740	104,94	52,44	93,72	25,12	200	99	0.00165166536818	0.041379479929	0.497,0.514	0.648,0.748	-0.192
60434	ENSG00000197122.13	SRC	chr20	+	37383756	37383874	37382618	37382786	37384149	37384403	60434	26,7	126,117	3,4	94,67	217	99	0.00165598233679	0.0414668275117	0.086,0.027	0.014,0.027	0.036
61819	ENSG00000099204.21	ABLIM1	chr10	-	114473878	114473956	114472976	114473132	114487957	114487993	61819	243,202	8,8	169,123	18,11	177	99	0.00165986070626	0.0415431102377	0.944,0.934	0.84,0.862	0.088
63827	ENSG00000149091.15	DGKZ	chr11	+	46369940	46370009	46369363	46369550	46371312	46371384	63827	84,66	0,1	67,63	3,5	168	99	0.00166484445812	0.0416469682557	1.0,0.975	0.929,0.881	0.083
78946	ENSG00000172530.22	BANP	chr16	+	87975047	87975203	87951431	87951515	87981035	87981127	78946	10,19	0,0	17,13	0,5	255	99	0.00166914362508	0.0417336055803	1.0,1.0	1.0,0.502	0.249
26074	ENSG00000132677.13	RHBG	chr1	+	156377300	156377487	156371181	156371254	156381346	156381513	26074	173,155	7,3	77,48	7,8	286	99	0.00167141900875	0.0417695808438	0.895,0.947	0.792,0.675	0.188
7893	ENSG00000006634.8	DBF4	chr7	+	87904291	87904416	87900763	87900878	87907187	87907219	7893	66,64	0,0	79,66	3,4	224	99	0.00167462902887	0.0418150174442	1.0,1.0	0.921,0.879	0.1
22606	ENSG00000198814.14	GK	chrX	+	30668011	30668118	30665510	30665584	30677374	30677452	22606	898,843	4,5	567,402	12,6	206	99	0.00167574953247	0.0418150174442	0.991,0.988	0.958,0.97	0.026
34315	ENSG00000087157.19	PGS1	chr17	+	78396307	78396385	78378648	78378808	78399347	78399537	34315	1,0	0,2	2,1	0,0	177	99	0.00167495991836	0.0418150174442	1.0,0.0	1.0,1.0	-0.5
65950	ENSG00000138303.18	ASCC1	chr10	-	72215781	72215854	72213186	72213331	72216206	72216311	65950	33,27	62,71	16,12	89,54	172	99	0.00168153828308	0.0419385055007	0.235,0.18	0.094,0.113	0.104
10204	ENSG00000146282.19	RARS2	chr6	-	87534734	87534858	87530783	87530942	87545615	87545699	10204	7,11	1,1	4,6	5,4	223	99	0.00168644280215	0.0419769569064	0.757,0.83	0.262,0.4	0.462
27049	ENSG00000173517.11	PEAK1	chr15	-	77365162	77365225	77286422	77286504	77420005	77420094	27049	12,32	5,3	14,13	1,0	162	99	0.00168440339749	0.0419769569064	0.595,0.867	0.895,1.0	-0.217
48421	ENSG00000204120.16	GIGYF2	chr2	+	232731121	232731258	232722553	232722658	232734416	232734486	48421	4,7	1,2	4,3	0,0	236	99	0.00168606524877	0.0419769569064	0.627,0.595	1.0,1.0	-0.389
76932	ENSG00000258867.8	LINC01146	chr14	+	88037350	88037439	88024549	88024669	88084036	88084155	76932	35,34	39,44	15,4	35,25	188	99	0.00168490421634	0.0419769569064	0.321,0.289	0.184,0.078	0.174
23488	ENSG00000135127.12	BICDL1	chr12	+	120074442	120074586	120072510	120072729	120080886	120081017	23488	12,18	5,3	0,4	4,4	243	99	0.00169134281552	0.042077946249	0.494,0.71	0.0,0.289	0.458
73577	ENSG00000063761.16	ADCK1	chr14	+	77900558	77900674	77899099	77899258	77907802	77907919	73577	4,2	7,9	0,0	11,5	215	99	0.00169571170717	0.0421656281129	0.208,0.093	0.0,0.0	0.15
27448	ENSG00000047579.20	DTNBP1	chr6	-	15651312	15651363	15637743	15637804	15652086	15652140	27448	73,98	2,0	41,32	5,2	150	99	0.00170382278438	0.0423462296898	0.96,1.0	0.844,0.913	0.101
13633	ENSG00000110717.13	NDUFS8	chr11	+	68032151	68032209	68030616	68030733	68032922	68033012	13633	31,16	0,1	12,12	2,3	157	99	0.00170680423703	0.0423992250543	1.0,0.91	0.791,0.716	0.202
37752	ENSG00000197302.11	KRBOX5	chr16	+	31722625	31722752	31713228	31713448	31753765	31753856	37752	14,25	5,1	25,21	1,0	226	99	0.00170878936721	0.0424274300816	0.551,0.916	0.916,1.0	-0.224
18943	ENSG00000173482.17	PTPRM	chr18	+	8371759	8371810	8370932	8371006	8376045	8376200	18943	9,8	112,99	1,1	76,51	150	99	0.0017106197469	0.0424517666911	0.05,0.051	0.009,0.013	0.04
38568	ENSG00000118495.21	PLAGL1	chr6	-	143947984	143948460	143940299	143942663	143960468	143960542	38568	45,42	2,0	61,32	4,9	575	99	0.00171633599738	0.0425566316961	0.795,1.0	0.724,0.38	0.345
78948	ENSG00000172530.22	BANP	chr16	+	87975047	87975207	87951434	87951515	87981035	87981127	78948	11,23	0,0	20,17	0,5	259	99	0.00171654996367	0.0425566316961	1.0,1.0	1.0,0.565	0.218
43489	ENSG00000100479.14	POLE2	chr14	-	49646993	49647092	49643563	49643670	49647292	49647360	43489	0,1	2,4	2,2	1,1	198	99	0.00172810774553	0.042821909599	0.0,0.111	0.5,0.5	-0.445
14499	ENSG00000183474.16	GTF2H2C	chr5	+	69562672	69562770	69560208	69560242	69565099	69565133	14499	15,19	0,0	18,26	4,1	197	99	0.00173042038794	0.0428376406161	1.0,1.0	0.693,0.929	0.189
70043	ENSG00000111445.14	RFC5	chr12	+	118017689	118017815	118016700	118016892	118017994	118018053	70043	9,13	2,2	10,7	0,0	225	99	0.00173045845512	0.0428376406161	0.664,0.741	1.0,1.0	-0.297
21588	ENSG00000134046.12	MBD2	chr18	-	54187713	54187837	54166075	54166166	54188873	54189011	21588	10,4	66,64	4,2	132,122	223	99	0.00173281568686	0.0428535017635	0.063,0.027	0.013,0.007	0.035
60919	ENSG00000178498.16	DTX3	chr12	+	57605988	57606029	57604622	57604858	57606189	57606252	60919	8,13	7,16	6,10	1,2	140	99	0.00173245143036	0.0428535017635	0.447,0.365	0.809,0.78	-0.388
57265	ENSG00000090054.16	SPTLC1	chr9	-	92033795	92034066	92031157	92032558	92034809	92034883	57265	17,14	188,168	5,3	236,150	370	99	0.0017393734587	0.0429731104237	0.024,0.022	0.006,0.005	0.018
76269	ENSG00000140525.20	FANCI	chr15	+	89294914	89295094	89293832	89293997	89299799	89299966	76269	75,105	0,2	122,82	10,2	279	99	0.00173895563589	0.0429731104237	1.0,0.949	0.812,0.936	0.1
44998	ENSG00000179832.18	MROH1	chr8	+	144242601	144242628	144242368	144242515	144243493	144243616	44998	12,6	12,11	1,3	16,11	126	99	0.0017416437817	0.0430079207043	0.44,0.3	0.047,0.176	0.259
36863	ENSG00000160932.11	LY6E	chr8	+	143020261	143020377	143018516	143018586	143020887	143020991	36863	9,9	42,31	5,0	44,38	215	99	0.00174788204796	0.0431193174588	0.09,0.118	0.05,0.0	0.079
82982	ENSG00000079805.19	DNM2	chr19	+	10796060	10796199	10795371	10795439	10797379	10797518	82982	98,101	73,71	170,148	79,47	238	99	0.00174743798606	0.0431193174588	0.358,0.372	0.472,0.567	-0.154
55434	ENSG00000124783.14	SSR1	chr6	-	7295384	7295485	7289675	7289931	7298746	7298823	55434	3,1	1,2	5,6	0,1	200	99	0.00174929689907	0.0431329103543	0.598,0.198	1.0,0.748	-0.476
75586	ENSG00000157734.14	SNX22	chr15	+	64152242	64152326	64151730	64151850	64152637	64152742	75586	2,4	0,1	0,1	2,0	183	99	0.00175456501115	0.0432414538854	1.0,0.684	0.0,1.0	0.342
38079	ENSG00000105640.13	RPL18A	chr19	+	17861292	17861307	17859931	17859974	17862093	17862223	38079	1,0	6,4	7,4	10,17	114	99	0.00176116714168	0.0433613592462	0.126,0.0	0.378,0.17	-0.211
80268	ENSG00000172057.10	ORMDL3	chr17	-	39924754	39924805	39924029	39924225	39925168	39925371	80268	8,5	3,3	7,3	1,0	150	99	0.00176062191597	0.0433613592462	0.638,0.524	0.822,1.0	-0.33
25861	ENSG00000139793.20	MBNL2	chr13	+	97356795	97356849	97346803	97347067	97357481	97357635	25861	169,106	12,21	60,40	26,10	153	99	0.00176404136857	0.0434107193564	0.901,0.766	0.599,0.721	0.174
65727	ENSG00000166004.15	CEP295	chr11	+	93702775	93702919	93702459	93702637	93706744	93706897	65727	29,43	0,0	29,13	5,0	243	99	0.00177279493024	0.0436046421979	1.0,1.0	0.703,1.0	0.149
27464	ENSG00000081051.8	AFP	chr4	+	73434469	73434610	73431158	73431283	73437159	73437210	27464	3,6	1,0	4,2	2,1	240	99	0.00177562481306	0.0436366711352	0.553,1.0	0.452,0.452	0.324
50170	ENSG00000086848.15	ALG9	chr11	-	111788440	111788569	111786280	111786520	111809642	111809773	50170	7,6	62,58	0,1	61,49	228	99	0.00177584498101	0.0436366711352	0.047,0.043	0.0,0.009	0.041
62767	ENSG00000148985.20	PGAP2	chr11	+	3817352	3817535	3808559	3808651	3823882	3824135	62767	17,13	0,1	6,8	3,1	282	99	0.00178130279285	0.0437492522134	1.0,0.82	0.412,0.737	0.335
52632	ENSG00000109654.16	TRIM2	chr4	+	153222242	153223039	153204442	153204560	153270337	153270519	52632	23,24	1,0	34,34	1,7	896	99	0.0017870725975	0.0438693814483	0.718,1.0	0.79,0.349	0.289
29663	ENSG00000029363.17	BCLAF1	chr6	-	136276467	136276508	136275842	136275989	136277864	136278103	29663	56,32	3,5	26,29	12,8	140	99	0.00179139876487	0.0439511569604	0.93,0.819	0.605,0.719	0.213
59406	ENSG00000165795.25	NDRG2	chr14	-	21018456	21018471	21018203	21018239	21018762	21018814	59406	9,8	3,4	29,13	1,1	114	99	0.00179216429816	0.0439511569604	0.723,0.635	0.962,0.919	-0.261
74702	ENSG00000114062.22	UBE3A	chr15	-	25407066	25407137	25405460	25405502	25409087	25409207	74702	37,41	57,62	6,18	62,37	170	99	0.00179425096708	0.0439807290316	0.274,0.278	0.053,0.221	0.139
27889	ENSG00000249096.7	LINC02362	chr4	-	184378498	184379129	184376440	184376544	184382133	184382303	27889	4,9	0,0	0,4	1,1	730	99	0.00179613093508	0.0440052079095	1.0,1.0	0.0,0.352	0.824
26810	ENSG00000084676.16	NCOA1	chr2	+	24768078	24768135	24762686	24762776	24768223	24768543	26810	12,30	5,3	13,12	1,0	156	99	0.00180123778136	0.0441086825214	0.604,0.864	0.892,1.0	-0.212
27513	ENSG00000213625.9	LEPROT	chr1	+	65429861	65430048	65425302	65425378	65431802	65436007	27513	554,511	8,17	861,624	10,2	286	99	0.00180237809529	0.0441149709196	0.96,0.912	0.968,0.991	-0.044
70045	ENSG00000111445.14	RFC5	chr12	+	118017689	118017852	118016728	118016892	118017994	118018053	70045	12,16	2,2	11,6	0,0	262	99	0.00180901515952	0.0442202743004	0.694,0.751	1.0,1.0	-0.278
74354	ENSG00000167522.17	ANKRD11	chr16	-	89291680	89291799	89291012	89291183	89305205	89305344	74354	40,35	89,75	17,8	65,57	218	99	0.00180933729338	0.0442202743004	0.17,0.175	0.106,0.06	0.089
76944	ENSG00000258867.8	LINC01146	chr14	+	88044614	88044848	88024518	88024669	88096498	88097628	76944	69,69	72,57	74,49	32,25	333	99	0.00180854166795	0.0442202743004	0.222,0.265	0.407,0.368	-0.144
38451	ENSG00000121940.17	CLCC1	chr1	-	108938165	108938308	108937076	108937418	108939635	108939782	38451	10,8	54,42	4,0	45,44	242	99	0.00181640163898	0.0443712085303	0.07,0.072	0.035,0.0	0.054
58414	ENSG00000204054.14	LINC00963	chr9	+	129502396	129503139	129493418	129493595	129503322	129503672	58414	239,218	56,64	125,122	58,56	842	99	0.00181894833769	0.0444116916622	0.334,0.286	0.202,0.204	0.107
378	ENSG00000101972.20	STAG2	chrX	+	124021366	124021431	123960518	123960866	124022530	124022671	378	21,20	7,12	13,8	25,10	164	99	0.00182207104541	0.0444458388553	0.644,0.502	0.239,0.326	0.29
61661	ENSG00000134955.12	SLC37A2	chr11	+	125086203	125086260	125085953	125086018	125088118	125089235	61661	3,4	4,7	0,1	3,5	156	99	0.00182212717824	0.0444458388553	0.322,0.266	0.0,0.113	0.238
42001	ENSG00000114956.20	DGUOK	chr2	+	73938909	73939022	73926825	73927052	73946718	73946906	42001	249,179	304,268	288,191	213,195	212	99	0.00182608675728	0.0444989447915	0.277,0.238	0.387,0.314	-0.093
80994	ENSG00000103226.19	NOMO3	chr16	+	16247394	16247467	16243160	16243261	16250927	16251080	80994	2,1	0,0	0,1	2,0	172	99	0.00182598519205	0.0444989447915	1.0,1.0	0.0,1.0	0.5
40128	ENSG00000172594.13	SMPDL3A	chr6	+	122795676	122795890	122789257	122789458	122796823	122796968	40128	234,171	6,16	261,208	5,2	313	99	0.0018280887129	0.0445071642168	0.925,0.772	0.943,0.97	-0.108
58572	ENSG00000181409.14	AATK	chr17	-	81123193	81123343	81120200	81122823	81124726	81124848	58572	41,19	0,2	15,16	3,4	249	99	0.00182820680156	0.0445071642168	1.0,0.791	0.665,0.614	0.256
6245	ENSG00000182095.15	TNRC18	chr7	-	5421059	5421489	5394439	5394595	5423440	5423546	6245	5,12	1,3	10,8	0,1	529	99	0.00183444747836	0.0445288269528	0.483,0.428	1.0,0.6	-0.345
6256	ENSG00000147421.18	HMBOX1	chr8	+	28924639	28924755	28890394	28890678	28963810	28963890	6256	5,2	12,14	0,0	12,7	215	99	0.00183384739387	0.0445288269528	0.161,0.062	0.0,0.0	0.112
23266	ENSG00000130822.16	PNCK	chrX	-	153686845	153686970	153686463	153686683	153687334	153687547	23266	26,20	0,0	51,28	4,2	224	99	0.00183414912791	0.0445288269528	1.0,1.0	0.849,0.861	0.145
44086	ENSG00000198373.13	WWP2	chr16	+	69783031	69783152	69776188	69776241	69786995	69787080	44086	22,12	40,31	19,16	13,12	220	99	0.00183335054642	0.0445288269528	0.198,0.148	0.397,0.375	-0.213
49477	ENSG00000151092.18	NGLY1	chr3	-	25720129	25720191	25719274	25719635	25729132	25729318	49477	82,82	1,6	106,88	15,12	161	99	0.00183149823917	0.0445288269528	0.981,0.894	0.813,0.818	0.122
72726	ENSG00000221926.13	TRIM16	chr17	-	15677175	15677280	15658801	15658876	15680864	15680953	72726	2,4	0,1	5,3	2,4	204	99	0.00183167809637	0.0445288269528	1.0,0.66	0.548,0.267	0.423
79632	ENSG00000205309.14	NT5M	chr17	+	17304363	17304477	17303677	17303817	17306542	17306643	79632	2,3	0,1	4,0	2,1	213	99	0.00183973511961	0.0446354782591	1.0,0.582	0.482,0.0	0.55
45116	ENSG00000048991.17	R3HDM1	chr2	+	135641535	135641790	135638895	135639122	135645378	135645527	45116	68,73	36,37	34,15	39,17	354	99	0.00184858638263	0.0448284442307	0.346,0.356	0.196,0.198	0.154
8481	ENSG00000141562.19	NARF	chr17	+	82480406	82480544	82478799	82478918	82481081	82481211	8481	13,14	123,153	6,4	177,131	237	99	0.00185171916097	0.0448826162264	0.042,0.037	0.014,0.013	0.026
2466	ENSG00000160310.19	PRMT2	chr21	+	46663382	46663554	46649574	46649739	46664294	46664951	2466	103,102	3,7	216,137	2,1	271	99	0.0018556041388	0.0449549588813	0.926,0.842	0.975,0.98	-0.094
25828	ENSG00000143409.17	MINDY1	chr1	-	151002164	151002170	151001724	151001782	151006311	151006871	25828	0,2	1,2	1,3	1,0	105	99	0.00185884631252	0.0449898474214	0.0,0.485	0.485,1.0	-0.5
44543	ENSG00000164828.18	SUN1	chr7	+	849922	850033	849519	849603	851383	851481	44543	101,109	0,0	93,70	5,2	210	99	0.00185819148636	0.0449898474214	1.0,1.0	0.898,0.943	0.08
55929	ENSG00000250337.9	PURPL	chr5	+	27494118	27494335	27484570	27485029	27495948	27496395	55929	100,81	4,2	74,73	14,6	316	99	0.00186042635716	0.0450062734687	0.887,0.927	0.623,0.792	0.2
68820	ENSG00000138050.15	THUMPD2	chr2	-	39757247	39757368	39755888	39755960	39761330	39761418	68820	37,48	20,19	25,30	39,26	220	99	0.00186277796377	0.0450413397138	0.454,0.532	0.224,0.342	0.21
36449	ENSG00000176623.12	RMDN1	chr8	-	86484871	86484961	86480276	86480332	86486483	86486515	36449	132,154	3,6	210,154	19,14	189	99	0.00186500497309	0.0450733607509	0.958,0.931	0.853,0.852	0.092
3629	ENSG00000196756.15	SNHG17	chr20	-	38427679	38427855	38426418	38426503	38431040	38431112	3629	7,15	35,24	3,3	30,33	275	99	0.00186935801343	0.0451130570172	0.067,0.184	0.035,0.032	0.092
24053	ENSG00000182796.16	TMEM198B	chr12	+	55834568	55834726	55832958	55833541	55834850	55834988	24053	14,10	20,29	4,1	19,21	257	99	0.00186877321897	0.0451130570172	0.212,0.117	0.075,0.018	0.118
43060	ENSG00000197355.11	UAP1L1	chr9	+	137078049	137078254	137077516	137077821	137078501	137078677	43060	21,10	0,0	12,15	3,1	304	99	0.00186897736192	0.0451130570172	1.0,1.0	0.566,0.83	0.302
38271	ENSG00000164002.12	EXO5	chr1	+	40509457	40509625	40508760	40508908	40509732	40509790	38271	27,19	0,0	50,15	1,4	267	99	0.00187904144127	0.0453248397121	1.0,1.0	0.949,0.582	0.235
35286	ENSG00000136682.16	CBWD2	chr2	+	113471032	113471089	113465128	113465173	113482176	113482228	35286	45,48	5,2	83,73	18,19	156	99	0.00188133764056	0.0453583146938	0.851,0.938	0.745,0.709	0.167
10126	ENSG00000132423.12	COQ3	chr6	-	99383697	99383824	99380188	99380341	99394073	99394191	10126	38,45	0,0	62,32	4,2	226	99	0.00188342161647	0.0453866432104	1.0,1.0	0.872,0.875	0.127
22810	ENSG00000143353.12	LYPLAL1	chr1	+	219179399	219179426	219179146	219179246	219193129	219193251	22810	2,6	23,11	1,0	19,7	126	99	0.00188846636266	0.04546763301	0.064,0.3	0.04,0.0	0.162
30450	ENSG00000289720.1	ENSG00000289720	chr20	+	34365459	34365576	34363305	34363349	34369393	34369470	30450	16,17	160,161	3,5	125,104	216	99	0.00188951429965	0.04546763301	0.044,0.046	0.011,0.022	0.028
51689	ENSG00000282508.2	LINC01002	chr19	-	223966	224048	221140	221205	229635	230164	51689	8,7	1,3	3,2	0,0	181	99	0.00188893874132	0.04546763301	0.814,0.561	1.0,1.0	-0.313
10851	ENSG00000124615.20	MOCS1	chr6	-	39927183	39927455	39925716	39925845	39934294	39934459	10851	5,3	0,0	1,8	0,4	371	99	0.00189054223967	0.0454704549947	1.0,1.0	1.0,0.348	0.326
62774	ENSG00000148985.20	PGAP2	chr11	+	3823612	3823740	3808293	3808315	3823882	3824135	62774	5,6	9,1	0,2	13,3	227	99	0.00189314448405	0.0455111204781	0.195,0.724	0.0,0.225	0.347
12894	ENSG00000197043.15	ANXA6	chr5	-	151110626	151110644	151109752	151109846	151117126	151117180	12894	398,414	58,82	680,541	186,145	117	99	0.00189530782018	0.0455412005628	0.853,0.81	0.756,0.759	0.074
71962	ENSG00000151338.21	MIPOL1	chr14	+	37212229	37212356	37197988	37198104	37227725	37227838	71962	8,7	3,3	5,4	1,0	226	99	0.00190287566452	0.0457010508923	0.539,0.505	0.687,1.0	-0.322
25035	ENSG00000174227.16	PIGG	chr4	+	501100	501170	500395	500601	505717	505927	25035	4,9	54,64	1,1	66,38	169	99	0.00190509284966	0.0457103272832	0.042,0.076	0.009,0.015	0.047
29506	ENSG00000231721.8	LINC-PINT	chr7	-	130967388	130967517	130959868	130959970	130984052	130984109	29506	7,4	2,1	5,1	0,0	228	99	0.00190431930946	0.0457103272832	0.603,0.635	1.0,1.0	-0.381
17873	ENSG00000115756.13	HPCAL1	chr2	+	10406264	10406361	10396834	10396920	10408561	10408734	17873	5,3	19,12	1,0	13,19	196	99	0.00191533516956	0.0459340059324	0.117,0.112	0.037,0.0	0.096
71549	ENSG00000101639.19	CEP192	chr18	+	13038369	13038579	13037236	13037301	13040829	13040956	71549	67,58	0,2	49,24	2,6	309	99	0.00192840509232	0.0462252494789	1.0,0.903	0.887,0.562	0.227
29010	ENSG00000163597.17	SNHG16	chr17	+	76558373	76558600	76557765	76557857	76561287	76561398	29010	34,42	358,432	23,33	615,498	326	99	0.00193658963695	0.0463991637056	0.028,0.029	0.011,0.02	0.013
47076	ENSG00000124549.16	BTN2A3P	chr6	+	26427870	26428107	26426241	26426523	26428642	26428785	47076	22,23	5,2	18,8	1,0	336	99	0.00193920317197	0.0464394981197	0.565,0.772	0.841,1.0	-0.252
27920	ENSG00000104763.20	ASAH1	chr8	-	18064456	18064531	18063184	18063230	18067219	18067298	27920	387,316	1,3	522,411	9,12	174	99	0.0019403775049	0.0464453447733	0.995,0.984	0.971,0.951	0.029
55225	ENSG00000132294.15	EFR3A	chr8	+	132000768	132000998	131996389	131996497	132001758	132001807	55225	20,13	95,110	4,2	72,45	329	99	0.00195494574201	0.0467716319331	0.06,0.034	0.016,0.013	0.033
71899	ENSG00000057593.14	F7	chr13	+	113114563	113114784	113113846	113113960	113115659	113115800	71899	50,75	123,133	34,18	121,81	320	99	0.00196024063511	0.0468758501684	0.112,0.149	0.08,0.064	0.058
72946	ENSG00000287151.1	C2orf27A	chr2	+	131733832	131733952	131722416	131722648	131750632	131750830	72946	12,12	2,2	6,9	0,0	219	99	0.00196277271641	0.0469139322657	0.731,0.731	1.0,1.0	-0.269
30280	ENSG00000076864.21	RAP1GAP	chr1	-	21603657	21603912	21602803	21602913	21606065	21606197	30280	20,16	71,54	8,7	70,71	354	99	0.00196731801418	0.0470000745292	0.073,0.077	0.031,0.027	0.046
69442	ENSG00000139350.12	NEDD1	chr12	+	96907603	96907856	96907237	96907300	96909751	96909895	69442	47,39	1,4	57,49	0,0	352	99	0.00197173956883	0.0470831795367	0.93,0.733	1.0,1.0	-0.168
40687	ENSG00000144824.21	PHLDB2	chr3	+	111949701	111949890	111948931	111949075	111952571	111952613	40687	4,12	52,31	2,0	25,26	288	99	0.00197702403575	0.0471868007309	0.026,0.117	0.027,0.0	0.058
62058	ENSG00000138162.19	TACC2	chr10	+	122215402	122215451	122210396	122211708	122216626	122216828	62058	33,41	1,0	24,21	1,5	148	99	0.0019782133823	0.0471926289497	0.957,1.0	0.941,0.737	0.139
62082	ENSG00000111371.16	SLC38A1	chr12	-	46243199	46243314	46229563	46229639	46268525	46269043	62082	30,29	7,0	43,31	1,0	214	99	0.00199043513981	0.0474615171757	0.665,1.0	0.952,1.0	-0.143
72315	ENSG00000167930.17	FAM234A	chr16	+	248243	248397	234843	234857	249548	249654	72315	2,6	127,141	11,12	127,109	253	99	0.00199281783505	0.047495650273	0.006,0.016	0.033,0.041	-0.026
18090	ENSG00000146409.12	SLC18B1	chr6	-	132790784	132790865	132790176	132790272	132796981	132797121	18090	6,8	49,47	2,1	52,45	180	99	0.00199694687091	0.0475713522001	0.063,0.086	0.021,0.012	0.058
22121	ENSG00000115486.13	GGCX	chr2	-	85552415	85552567	85551811	85551981	85552938	85553070	22121	142,125	15,12	462,280	14,15	251	99	0.00199976978331	0.0476158822367	0.789,0.804	0.929,0.88	-0.108
24383	ENSG00000010270.14	STARD3NL	chr7	+	38201713	38201966	38179089	38179145	38207446	38207729	24383	13,13	23,23	1,3	15,13	352	99	0.00200210954623	0.0476488711882	0.137,0.137	0.018,0.061	0.098
3295	ENSG00000000419.14	DPM1	chr20	-	50941104	50941209	50940864	50940933	50942030	50942126	3295	46,39	364,424	43,15	573,413	204	99	0.00200430917281	0.0476784951442	0.058,0.043	0.035,0.017	0.025
6265	ENSG00000104299.15	INTS9	chr8	-	28846746	28846809	28837636	28837776	28850212	28850273	6265	35,52	4,4	36,21	9,12	162	99	0.00200629275171	0.0477029539932	0.842,0.888	0.71,0.517	0.252
35122	ENSG00000197965.12	MPZL1	chr1	+	167776063	167776166	167773235	167773368	167787819	167788012	35122	193,177	50,39	253,208	33,26	202	99	0.00201307717735	0.0478414833614	0.654,0.69	0.79,0.797	-0.122
57479	ENSG00000122729.19	ACO1	chr9	+	32386370	32386438	32384619	32384735	32405484	32405603	57479	5,6	29,26	2,1	47,35	167	99	0.00201912352398	0.0479623485613	0.093,0.12	0.025,0.017	0.085
53643	ENSG00000198408.14	OGA	chr10	-	101793912	101793998	101792838	101792943	101797979	101798154	53643	219,202	10,9	136,126	1,2	185	99	0.00202347315252	0.0480428140649	0.921,0.923	0.986,0.971	-0.056
4786	ENSG00000167562.14	ZNF701	chr19	+	52572236	52572368	52570300	52570330	52574076	52574162	4786	5,4	5,7	1,0	2,5	231	99	0.00202908519613	0.048153162038	0.3,0.197	0.176,0.0	0.161
72734	ENSG00000151332.20	MBIP	chr14	-	36305088	36305304	36300784	36300823	36311572	36311590	72734	29,22	3,7	15,9	15,7	315	99	0.00203282878605	0.0482190850909	0.752,0.497	0.239,0.288	0.361
62579	ENSG00000255284.4	GATD1-DT	chr11	+	778112	778218	777607	777695	783529	783671	62579	23,7	0,0	13,8	2,2	205	99	0.00203452344826	0.0482363676615	1.0,1.0	0.758,0.659	0.291
24000	ENSG00000135341.19	MAP3K7	chr6	-	90544551	90544632	90536336	90536401	90547257	90547357	24000	83,88	39,36	58,62	65,44	180	99	0.00203671263094	0.0482653528123	0.539,0.573	0.329,0.437	0.173
16685	ENSG00000163319.11	MRPS18C	chr4	+	83458345	83458429	83456908	83456958	83459739	83459797	16685	238,225	71,67	269,244	136,113	183	99	0.00204264203827	0.0483829030422	0.645,0.645	0.517,0.539	0.117
18047	ENSG00000101255.12	TRIB3	chr20	+	382432	382626	381296	381500	388010	388301	18047	7,11	1,3	5,6	7,9	293	99	0.00204570694582	0.048403917441	0.703,0.553	0.194,0.184	0.439
35146	ENSG00000164118.13	CEP44	chr4	+	174297965	174298062	174283968	174284140	174299071	174299210	35146	29,34	4,3	34,18	0,1	196	99	0.0020452787931	0.048403917441	0.785,0.851	1.0,0.901	-0.132
43297	ENSG00000106692.15	FKTN	chr9	+	105573654	105573746	105558129	105558165	105574944	105575137	43297	14,22	0,3	20,4	6,7	191	99	0.00204643747808	0.048403917441	1.0,0.792	0.633,0.229	0.465
72733	ENSG00000151332.20	MBIP	chr14	-	36305088	36305304	36300784	36300823	36308091	36308189	72733	37,25	186,177	18,14	248,149	315	99	0.00205079771719	0.0484840818262	0.059,0.043	0.022,0.029	0.025
21045	ENSG00000163029.16	SMC6	chr2	-	17713384	17713580	17708638	17708753	17714860	17714877	21045	49,41	87,93	11,12	59,43	295	99	0.00205531247336	0.0485678216315	0.159,0.129	0.059,0.086	0.072
55621	ENSG00000173137.12	ADCK5	chr8	+	144375465	144375637	144374054	144374107	144379386	144379421	55621	13,8	24,30	2,2	17,25	271	99	0.00205752364256	0.0485970733191	0.165,0.089	0.041,0.028	0.092
35804	ENSG00000166526.18	ZNF3	chr7	-	100077228	100077433	100075541	100075630	100079535	100079656	35804	99,109	2,6	135,69	0,1	304	99	0.00206266693843	0.0486725060977	0.942,0.855	1.0,0.957	-0.08
48368	ENSG00000285756.2	ENSG00000285756	chrX	-	3822072	3822285	3818656	3818703	3822373	3822580	48368	20,18	2,2	16,16	0,0	312	99	0.00206261512019	0.0486725060977	0.76,0.741	1.0,1.0	-0.25
8714	ENSG00000172965.17	MIR4435-2HG	chr2	-	111365560	111365662	111343581	111344237	111367486	111367575	8714	6,5	3,0	3,0	6,2	201	99	0.0020678540575	0.048771856847	0.496,1.0	0.198,0.0	0.649
9446	ENSG00000112110.10	MRPL18	chr6	+	159790667	159790787	159789885	159790060	159790939	159791126	9446	29,23	39,26	16,10	51,30	219	99	0.00208055545629	0.0490482599094	0.252,0.286	0.124,0.131	0.142
77612	ENSG00000213468.7	FIRRE	chrX	-	131743095	131743248	131711650	131711744	131749305	131749458	77612	2,3	0,0	0,3	3,0	252	99	0.00208398240705	0.0491058638822	1.0,1.0	0.0,1.0	0.5
32196	ENSG00000182979.18	MTA1	chr14	+	105449358	105449409	105445417	105445511	105450057	105450184	32196	129,69	39,50	80,68	94,77	150	99	0.00208976796779	0.0492189643395	0.686,0.477	0.36,0.368	0.218
61142	ENSG00000026103.25	FAS	chr10	+	89012198	89012335	89011998	89012081	89013342	89013367	61142	2,4	7,11	0,0	11,15	236	99	0.00209457060116	0.0493088188055	0.107,0.132	0.0,0.0	0.119
40632	ENSG00000163125.16	RPRD2	chr1	+	150441880	150441958	150440922	150441023	150443230	150443283	40632	21,23	53,42	34,19	19,21	177	99	0.00209666511135	0.0493348660108	0.181,0.234	0.5,0.336	-0.211
43505	ENSG00000132535.22	DLG4	chr17	-	7191892	7192002	7191266	7191358	7192944	7193117	43505	14,32	5,7	4,7	8,6	209	99	0.00209787285568	0.0493400327635	0.57,0.684	0.191,0.356	0.354
83357	ENSG00000167491.18	GATAD2A	chr19	+	19436130	19436219	19385825	19386138	19465339	19465577	83357	8,6	10,1	2,5	0,1	188	99	0.00209919252796	0.0493478258538	0.296,0.76	1.0,0.725	-0.335
78284	ENSG00000159753.15	CARMIL2	chr16	+	67656800	67656881	67656423	67656645	67657238	67657316	78284	4,3	0,1	3,4	2,2	180	99	0.00210126232216	0.0493732371801	1.0,0.623	0.452,0.524	0.324
13887	ENSG00000145730.21	PAM	chr5	+	103028184	103028238	103025130	103025334	103028886	103029267	13887	200,176	9,12	190,164	25,21	153	99	0.00210386440486	0.0493878954391	0.935,0.905	0.831,0.835	0.087
50130	ENSG00000124228.15	DDX27	chr20	+	49231022	49231115	49230198	49230349	49233305	49233405	50130	45,39	129,140	19,13	110,100	192	99	0.00210289037272	0.0493878954391	0.152,0.126	0.082,0.063	0.067
55323	ENSG00000239556.4	UPK3BL3P	chr7	-	43986191	43986312	43984994	43985103	43986600	43986677	55323	3,6	0,1	9,0	3,1	220	99	0.00210743858427	0.0494429725563	1.0,0.73	0.574,0.0	0.578
59460	ENSG00000120549.19	KIAA1217	chr10	+	24542882	24544481	24542692	24542770	24544980	24545103	59460	401,405	3,3	405,362	0,0	1698	99	0.00210819107513	0.0494429725563	0.886,0.887	1.0,1.0	-0.113
4805	ENSG00000197608.12	ZNF841	chr19	-	52076957	52077084	52064464	52067610	52084786	52084878	4805	54,39	0,6	12,15	0,0	226	99	0.00211030561852	0.0494693285626	1.0,0.74	1.0,1.0	-0.13
25014	ENSG00000237094.12	ENSG00000237094	chr1	-	498046	498305	497239	497299	498398	498456	25014	6,11	8,6	0,1	1,2	358	99	0.00211197458866	0.0494852197027	0.172,0.336	0.0,0.121	0.194
64813	ENSG00000173715.18	C11orf80	chr11	+	66821642	66821764	66815833	66816199	66828265	66828364	64813	40,54	1,6	56,31	1,0	221	99	0.00211381317103	0.0495050682189	0.947,0.801	0.962,1.0	-0.107
11013	ENSG00000111319.13	SCNN1A	chr12	-	6349163	6349221	6348949	6349005	6349326	6349405	11013	357,342	5,7	131,131	10,6	157	99	0.00211682998678	0.0495524791701	0.978,0.969	0.892,0.932	0.061
68733	ENSG00000166881.10	NEMP1	chr12	-	57069233	57069306	57064645	57064739	57070819	57070893	68733	4,4	5,6	8,7	2,1	172	99	0.00213098416282	0.0498604359109	0.315,0.277	0.697,0.801	-0.453
32877	ENSG00000138709.19	LARP1B	chr4	+	128178430	128178642	128162193	128162317	128199438	128199599	32877	52,45	0,0	48,30	1,4	311	99	0.00213804826286	0.0500022893737	1.0,1.0	0.939,0.705	0.178
15667	ENSG00000115875.19	SRSF7	chr2	-	38748897	38749173	38748578	38748653	38749528	38749705	15667	208,218	226,241	142,137	267,207	375	99	0.00213922757345	0.0500064475515	0.195,0.193	0.123,0.149	0.058
48646	ENSG00000093000.19	NUP50	chr22	+	45171808	45172037	45171599	45171683	45175893	45176080	48646	12,8	79,77	1,3	87,46	328	99	0.00214353270406	0.0500718088561	0.044,0.03	0.003,0.019	0.026
59307	ENSG00000241058.4	NSUN6	chr10	-	18609844	18609926	18596207	18596327	18614459	18614613	59307	182,167	1,0	93,53	3,4	181	99	0.00214402930713	0.0500718088561	0.99,1.0	0.944,0.879	0.084
43270	ENSG00000104635.15	SLC39A14	chr8	+	22412036	22412206	22408309	22408496	22414779	22414902	43270	1547,1442	1,4	1783,1148	14,12	269	99	0.00214793711034	0.0501396203162	0.998,0.993	0.979,0.972	0.02
10744	ENSG00000002822.16	MAD1L1	chr7	-	2225409	2225550	2222574	2222754	2229983	2230143	10744	88,108	7,8	94,70	3,0	240	99	0.00216328477409	0.050409583212	0.838,0.848	0.928,1.0	-0.121
67469	ENSG00000032742.18	IFT88	chr13	+	20690704	20690815	20670972	20671039	20691053	20691217	67469	73,83	0,1	78,70	0,8	210	99	0.00216555959203	0.050409583212	1.0,0.975	1.0,0.805	0.085
69690	ENSG00000120832.10	MTERF2	chr12	-	106980620	106980713	106978455	106978771	106985114	106985286	69690	2,10	48,39	1,0	26,26	192	99	0.00216121304456	0.050409583212	0.021,0.117	0.019,0.0	0.06
75306	ENSG00000197535.16	MYO5A	chr15	-	52348817	52348826	52346360	52346461	52351253	52351481	75306	0,1	1,3	4,0	0,1	108	99	0.00216425725078	0.050409583212	0.0,0.234	1.0,0.0	-0.383
76310	ENSG00000259736.1	CRTC3-AS1	chr15	-	90714920	90715042	90712992	90713299	90716980	90717141	76310	4,2	1,2	0,1	1,2	221	99	0.00216361762353	0.050409583212	0.642,0.309	0.0,0.183	0.384
81627	ENSG00000178927.19	CYBC1	chr17	-	82449430	82450254	82449169	82449292	82450699	82450768	81627	221,169	41,47	134,83	46,48	923	99	0.00216491716644	0.050409583212	0.366,0.278	0.238,0.156	0.125
76925	ENSG00000258867.8	LINC01146	chr14	+	88025406	88025481	88024518	88024669	88044685	88044848	76925	58,72	12,8	29,22	15,9	174	99	0.00216817354367	0.0504469120266	0.733,0.837	0.524,0.582	0.232
49883	ENSG00000147155.11	EBP	chrX	+	48522192	48522252	48521868	48521907	48523698	48524072	49883	5,14	184,183	7,7	494,401	159	99	0.00217101064491	0.0504893956735	0.017,0.045	0.009,0.011	0.021
47440	ENSG00000239523.8	MYLK-AS1	chr3	+	123611234	123611355	123585543	123585801	123629490	123629681	47440	5,6	2,2	8,3	1,0	220	99	0.002172935992	0.0505106457247	0.529,0.574	0.783,1.0	-0.34
16803	ENSG00000138688.17	KIAA1109	chr4	+	122316347	122316548	122315461	122315688	122316731	122316794	16803	92,90	58,58	24,33	42,33	300	99	0.0021751468878	0.0505385105885	0.344,0.339	0.159,0.248	0.138
71714	ENSG00000144455.14	SUMF1	chr3	-	3795295	3795428	3788913	3789074	3822733	3822897	71714	1,8	5,4	1,0	2,7	232	99	0.00218129294441	0.0506398811502	0.079,0.46	0.176,0.0	0.182
72069	ENSG00000227681.5	ENSG00000227681	chr6	+	147733728	147733811	147660736	147660819	147737316	147737556	72069	210,204	2,6	375,315	16,21	182	99	0.00218153820981	0.0506398811502	0.983,0.949	0.927,0.891	0.057
21102	ENSG00000272886.6	DCP1A	chr3	-	53338090	53338145	53319406	53319473	53342143	53342271	21102	5,5	44,58	0,0	44,26	154	99	0.00218582448066	0.0506692006017	0.068,0.053	0.0,0.0	0.06
49097	ENSG00000134086.9	VHL	chr3	+	10142762	10143021	10141785	10142187	10146513	10146636	49097	87,64	65,59	42,37	76,48	358	99	0.0021847012765	0.0506692006017	0.27,0.231	0.133,0.176	0.096
60745	ENSG00000102796.12	DHRS12	chr13	-	51797825	51797908	51791164	51791257	51799533	51799667	60745	29,37	6,8	32,14	17,15	182	99	0.00218584562889	0.0506692006017	0.724,0.716	0.506,0.337	0.298
48481	ENSG00000171084.17	FAM86JP	chr3	+	125918863	125918926	125916608	125916719	125920824	125920905	48481	3,1	0,0	1,0	0,2	162	99	0.00218759861444	0.0506863046021	1.0,1.0	1.0,0.0	0.5
3716	ENSG00000080845.19	DLGAP4	chr20	+	36465264	36465367	36461467	36461510	36496704	36497066	3716	21,6	124,105	18,19	66,63	202	99	0.00219314534843	0.0507912525011	0.077,0.027	0.118,0.129	-0.072
55922	ENSG00000250337.9	PURPL	chr5	+	27489281	27489386	27475534	27475695	27495948	27496404	55922	7,9	2,5	4,1	11,3	204	99	0.00219471085551	0.0508039442404	0.629,0.466	0.15,0.139	0.403
23384	ENSG00000114120.14	SLC25A36	chr3	+	140966999	140967036	140963126	140963227	140970926	140970993	23384	14,11	61,64	6,3	84,58	136	99	0.00219831388873	0.0508637677378	0.143,0.111	0.049,0.036	0.085
16400	ENSG00000015676.18	NUDCD3	chr7	-	44425899	44426279	44413190	44413283	44427570	44427703	16400	3,6	0,4	8,1	0,0	479	99	0.00220618827339	0.050975097954	1.0,0.237	1.0,1.0	-0.381
48302	ENSG00000153071.15	DAB2	chr5	-	39418180	39418345	39394353	39394421	39424803	39424870	48302	4,6	20,19	0,0	5,4	264	99	0.00220525942109	0.050975097954	0.07,0.106	0.0,0.0	0.088
56467	ENSG00000165282.15	PIGO	chr9	-	35093029	35093209	35091239	35092767	35093420	35093580	56467	196,139	2,0	155,100	5,4	279	99	0.00220581779336	0.050975097954	0.972,1.0	0.917,0.899	0.078
46479	ENSG00000164659.15	ELAPOR2	chr7	-	86947726	86947922	86944898	86945046	86964903	86965024	46479	57,45	1,0	31,20	1,4	295	99	0.00221797717772	0.0512237828218	0.95,1.0	0.912,0.627	0.205
37684	ENSG00000225210.10	DUXAP9	chr14	+	19064582	19064693	19062315	19062466	19066000	19066115	37684	13,15	25,23	2,2	20,7	210	99	0.002219706677	0.0512400250066	0.197,0.235	0.045,0.119	0.134
11343	ENSG00000204623.11	ZNRD1ASP	chr6	-	30003166	30003368	30001010	30002732	30007222	30007396	11343	8,4	1,0	9,4	1,4	301	99	0.00223262310678	0.051493235512	0.725,1.0	0.747,0.247	0.366
55971	ENSG00000164946.20	FREM1	chr9	-	14746352	14746468	14740148	14740234	14746922	14747051	55971	778,712	11,10	440,365	1,0	215	99	0.00223273827649	0.051493235512	0.97,0.97	0.995,1.0	-0.028
30297	ENSG00000230790.2	ENSG00000230790	chr2	-	11742036	11742156	11740996	11741302	11745166	11745301	30297	1,1	3,0	3,2	0,0	219	99	0.00224145451188	0.0516465460234	0.131,1.0	1.0,1.0	-0.434
66346	ENSG00000160584.17	SIK3	chr11	-	116875865	116876009	116875373	116875451	116876252	116876363	66346	74,81	15,17	82,58	7,3	243	99	0.00224099938793	0.0516465460234	0.668,0.66	0.827,0.887	-0.193
75520	ENSG00000129003.19	VPS13C	chr15	-	61864640	61864820	61863439	61863528	61868658	61868773	75520	22,15	40,50	5,5	39,32	279	99	0.00224887169395	0.0517935482245	0.163,0.096	0.044,0.053	0.081
15088	ENSG00000250722.6	SELENOP	chr5	-	42810690	42810778	42801237	42801331	42811835	42811893	15088	320,314	78,57	328,252	141,74	187	99	0.00225394471353	0.0518386519997	0.685,0.745	0.552,0.643	0.118
32381	ENSG00000214796.9	TUBA5P	chr1	-	202855551	202856156	202852990	202853280	202857646	202857795	32381	24,11	1,0	22,11	3,1	704	99	0.00225325577179	0.0518386519997	0.771,1.0	0.508,0.607	0.328
60396	ENSG00000072422.17	RHOBTB1	chr10	-	60910886	60910990	60892809	60892995	60911350	60911552	60396	109,92	3,8	60,32	0,1	203	99	0.00225222490782	0.0518386519997	0.947,0.849	1.0,0.94	-0.072
44055	ENSG00000130165.11	ELOF1	chr19	-	11554819	11554946	11554231	11554365	11555521	11555715	44055	3,1	3,1	0,0	4,1	226	99	0.00225937836024	0.0519396965493	0.305,0.305	0.0,0.0	0.305
58330	ENSG00000119392.16	GLE1	chr9	+	128507215	128507340	128504736	128504904	128508875	128509097	58330	5,4	29,20	19,16	34,27	224	99	0.00226355255913	0.0520117086194	0.071,0.081	0.198,0.208	-0.127
27673	ENSG00000162341.18	TPCN2	chr11	+	69063894	69063967	69062883	69062990	69078481	69078601	27673	10,11	0,0	11,7	2,2	172	99	0.00226727188672	0.0520732072566	1.0,1.0	0.76,0.668	0.286
55380	ENSG00000169398.20	PTK2	chr8	-	140948665	140948723	140890542	140890769	141001124	141001164	55380	5,15	14,27	2,2	16,19	157	99	0.00227251855547	0.0521697121808	0.184,0.259	0.073,0.062	0.154
7550	ENSG00000166833.23	NAV2	chr11	+	20051288	20051333	20048727	20049195	20054079	20054240	7550	20,27	35,30	53,42	35,21	144	99	0.00227508821438	0.0522047011177	0.282,0.382	0.51,0.579	-0.213
64336	ENSG00000197879.17	MYO1C	chr17	-	1486951	1487098	1484147	1484303	1491599	1491610	64336	3,5	3,2	0,2	3,8	246	99	0.00227813470957	0.0522505944803	0.287,0.502	0.0,0.091	0.349
14683	ENSG00000205937.12	RNPS1	chr16	-	2264572	2264760	2264175	2264331	2268054	2268091	14683	851,919	105,75	803,577	113,107	287	99	0.00228229852213	0.0523220603804	0.737,0.809	0.71,0.65	0.093
80747	ENSG00000006282.21	SPATA20	chr17	+	50547719	50547954	50547128	50547285	50548282	50548453	80747	18,7	11,2	4,3	11,7	334	99	0.00228768514526	0.052421480949	0.327,0.509	0.097,0.113	0.313
4053	ENSG00000197586.13	ENTPD6	chr20	+	25206521	25206590	25195700	25195867	25209848	25209925	4053	60,75	14,9	36,29	16,15	168	99	0.00229598449756	0.0525875238292	0.716,0.831	0.57,0.533	0.222
28705	ENSG00000007541.17	PIGQ	chr16	+	582247	582309	580182	580972	582882	582893	28705	23,25	4,4	26,18	17,9	161	99	0.00230350667197	0.0527356220257	0.78,0.794	0.485,0.552	0.269
31729	ENSG00000162482.5	AKR7A3	chr1	-	19285017	19285114	19284685	19284785	19285887	19285992	31729	12,7	2,2	2,2	0,0	196	99	0.00230732834684	0.05277471905	0.752,0.639	1.0,1.0	-0.304
78915	ENSG00000033100.17	CHPF2	chr7	+	151236955	151237172	151236407	151236590	151237373	151237593	78915	35,22	62,58	20,10	72,70	316	99	0.00230704148427	0.05277471905	0.15,0.106	0.08,0.043	0.067
67550	ENSG00000144285.23	SCN1A	chr2	-	166077709	166077847	166073357	166073670	166127770	166128015	67550	72,46	13,7	30,17	2,0	237	99	0.00231811043637	0.0529970568674	0.698,0.733	0.862,1.0	-0.216
43539	ENSG00000168575.10	SLC20A2	chr8	-	42471066	42471201	42465776	42465917	42472101	42472654	43539	9,14	40,38	1,3	29,22	234	99	0.00232349457493	0.0530958387281	0.087,0.135	0.014,0.055	0.076
56836	ENSG00000021574.13	SPAST	chr2	+	32098800	32098891	32089521	32089605	32114637	32114825	56836	88,90	1,7	61,44	13,5	190	99	0.002324772089	0.0531007297236	0.979,0.87	0.71,0.821	0.159
40251	ENSG00000115310.19	RTN4	chr2	-	55025085	55027485	54987490	54987698	55028163	55028220	40251	326,327	19,24	31,34	9,4	2499	99	0.00233284154724	0.0532120197785	0.405,0.351	0.12,0.252	0.192
44552	ENSG00000167792.13	NDUFV1	chr11	+	67607365	67607616	67606943	67607076	67608395	67608478	44552	40,39	327,281	21,16	300,257	350	99	0.00233265734378	0.0532120197785	0.033,0.038	0.019,0.017	0.018
47818	ENSG00000178440.8	TIMM23B-AGAP6	chr10	+	49943234	49943358	49942056	49942300	49945031	49945090	47818	14,20	17,20	3,2	14,7	223	99	0.0023308596395	0.0532120197785	0.268,0.307	0.087,0.113	0.187
38268	ENSG00000164002.12	EXO5	chr1	+	40509450	40509625	40508766	40508908	40509732	40509790	38268	31,22	0,0	57,16	1,4	274	99	0.00233530833145	0.053226756941	1.0,1.0	0.954,0.591	0.228
52106	ENSG00000172780.17	RAB43	chr3	-	129092499	129092593	129090493	129091346	129094985	129095169	52106	7,7	43,40	3,1	63,43	193	99	0.00233668565049	0.053226756941	0.077,0.082	0.024,0.012	0.061
57768	ENSG00000166199.13	ALKBH3	chr11	+	43892040	43892129	43889724	43889828	43901515	43901714	57768	106,80	0,2	89,83	6,4	188	99	0.00233587550562	0.053226756941	1.0,0.955	0.887,0.916	0.076
56963	ENSG00000108509.21	CAMTA2	chr17	-	4969499	4969520	4969149	4969337	4969629	4969701	56963	3,3	25,13	0,0	15,27	120	99	0.00235264339636	0.0535658173386	0.09,0.16	0.0,0.0	0.125
80434	ENSG00000131477.11	RAMP2	chr17	+	42762339	42762463	42761833	42761899	42762596	42762854	80434	13,9	0,0	33,19	4,1	223	99	0.0023581585297	0.0536669159282	1.0,1.0	0.786,0.894	0.16
65026	ENSG00000119912.18	IDE	chr10	-	92480792	92480916	92479276	92479421	92483254	92483337	65026	15,6	29,41	4,1	40,25	223	99	0.0023666526762	0.0538356878248	0.187,0.061	0.043,0.017	0.094
15945	ENSG00000159692.17	CTBP1	chr4	-	1241324	1241519	1238182	1238337	1248915	1248976	15945	401,371	10,4	432,332	2,1	294	99	0.00237498627313	0.0540006555572	0.931,0.969	0.986,0.991	-0.038
38750	ENSG00000156869.14	FRRS1	chr1	-	99748896	99749001	99747594	99748768	99766606	99766631	38750	214,241	7,5	179,159	0,1	204	99	0.00237875556057	0.0540617405074	0.937,0.959	1.0,0.987	-0.046
23254	ENSG00000163607.18	GTPBP8	chr3	+	112995134	112995265	112993025	112993124	112996891	112996991	23254	70,60	3,4	102,53	1,0	230	99	0.00238112580472	0.0540909884238	0.909,0.866	0.978,1.0	-0.102
60293	ENSG00000242086.8	MUC20-OT1	chr3	+	195722500	195722818	195708241	195708841	195724679	195724753	60293	4,5	2,3	3,8	1,0	417	99	0.00239903957933	0.0544731447183	0.322,0.284	0.416,1.0	-0.405
77362	ENSG00000103356.18	EARS2	chr16	-	23553043	23553123	23552148	23552304	23557204	23557364	77362	6,5	13,23	0,2	18,17	179	99	0.00240806048271	0.054653121801	0.203,0.107	0.0,0.061	0.124
58835	ENSG00000196586.17	MYO6	chr6	+	75898372	75898411	75893930	75895260	75907604	75907708	58835	75,77	17,23	43,46	5,3	138	99	0.00241294445632	0.054739086619	0.76,0.706	0.861,0.917	-0.156
27243	ENSG00000196911.12	KPNA5	chr6	+	116681492	116681552	116681210	116681338	116689319	116689453	27243	5,7	42,44	1,0	20,23	159	99	0.00241590692099	0.0547609599448	0.069,0.09	0.03,0.0	0.065
50123	ENSG00000005189.20	REXO5	chr16	+	20824438	20824527	20821761	20821902	20825832	20825871	50123	43,50	3,4	26,9	9,3	188	99	0.00241719884878	0.0547609599448	0.883,0.868	0.603,0.612	0.268
58021	ENSG00000148180.22	GSN	chr9	+	121300055	121300126	121281469	121281562	121301923	121302167	58021	1,2	0,1	2,1	2,4	170	99	0.00241667071441	0.0547609599448	1.0,0.538	0.368,0.127	0.522
82713	ENSG00000178078.12	STAP2	chr19	-	4324454	4324667	4324042	4324197	4325215	4325308	82713	202,184	1,4	261,153	12,7	312	99	0.00241879107671	0.0547721801593	0.985,0.936	0.873,0.874	0.087
42648	ENSG00000140368.14	PSTPIP1	chr15	+	77031179	77032952	77030501	77030581	77035507	77035563	42648	61,40	1,1	71,59	11,5	1872	99	0.00242008376413	0.0547766103476	0.763,0.679	0.254,0.384	0.402
29548	ENSG00000128654.14	MTX2	chr2	+	176270215	176270419	176269394	176269669	176296859	176296907	29548	77,91	103,88	47,40	109,69	303	99	0.00242202541565	0.0547957186356	0.196,0.253	0.123,0.159	0.083
70834	ENSG00000139597.18	N4BP2L1	chr13	-	32411527	32411592	32407644	32407772	32415958	32416029	70834	3,2	2,1	0,1	1,1	164	99	0.00242377910655	0.0548105591346	0.475,0.547	0.0,0.376	0.323
81888	ENSG00000154864.14	PIEZO2	chr18	-	10801389	10801428	10800336	10800475	10803874	10803994	81888	42,59	0,0	24,17	3,2	138	99	0.00243072415275	0.0549427286876	1.0,1.0	0.852,0.859	0.145
24358	ENSG00000141560.15	FN3KRP	chr17	+	82720760	82720965	82720271	82720363	82722803	82722886	24358	11,14	60,38	7,5	76,66	304	99	0.00243419384183	0.0549962591477	0.056,0.107	0.029,0.024	0.055
75910	ENSG00000167173.19	C15orf39	chr15	+	75201960	75202059	75198865	75199161	75205998	75206112	75910	37,36	1,0	18,23	2,3	198	99	0.00243532747049	0.0549969859471	0.949,1.0	0.818,0.793	0.169
1002	ENSG00000102225.17	CDK16	chrX	+	47222260	47222380	47218412	47218664	47223551	47223759	1002	17,10	15,12	8,3	19,20	219	99	0.00243936190106	0.0550622293765	0.339,0.274	0.16,0.064	0.195
15717	ENSG00000164362.21	TERT	chr5	-	1286164	1287086	1282428	1282624	1292963	1294666	15717	5,6	3,0	9,4	0,0	1021	99	0.00244042205464	0.0550622293765	0.139,1.0	1.0,1.0	-0.43
74179	ENSG00000100711.14	ZFYVE21	chr14	+	103729792	103729846	103729090	103729182	103732619	103732762	74179	14,15	28,44	7,2	32,39	153	99	0.00244285535961	0.0550922362063	0.244,0.181	0.124,0.032	0.135
13794	ENSG00000151012.13	SLC7A11	chr4	-	138182296	138182393	138180640	138180790	138183201	138183305	13794	88,108	5,4	35,24	0,0	196	99	0.00244951914784	0.0552175803931	0.899,0.932	1.0,1.0	-0.085
52827	ENSG00000122490.19	SLC66A2	chr18	-	79949518	79949636	79943328	79943462	79950723	79951025	52827	22,36	141,121	17,14	167,131	217	99	0.00246030526905	0.0554356960239	0.066,0.12	0.044,0.046	0.048
47416	ENSG00000128739.23	SNRPN	chr15	+	24974641	24974957	24974310	24974456	24975357	24975509	47416	35,50	609,575	24,5	569,411	415	99	0.0024701604385	0.0556326481077	0.014,0.02	0.01,0.003	0.011
37037	ENSG00000176261.16	ZBTB8OS	chr1	-	32634767	32634792	32627507	32627544	32650432	32650535	37037	115,130	4,7	127,102	17,12	124	99	0.00247438810944	0.0557027379136	0.958,0.937	0.856,0.872	0.084
78743	ENSG00000231312.8	MAP4K3-DT	chr2	+	39518582	39518710	39516413	39516541	39599365	39601410	78743	318,259	3,16	310,246	2,3	227	99	0.00248231187936	0.055855932604	0.979,0.876	0.985,0.973	-0.051
34997	ENSG00000135164.19	DMTF1	chr7	+	87154389	87154528	87152435	87152555	87163238	87163332	34997	9,12	2,4	9,5	0,1	238	99	0.00248488340627	0.0558795648001	0.652,0.555	1.0,0.675	-0.234
65356	ENSG00000123684.13	LPGAT1	chr1	-	211830182	211830330	211829058	211829323	211830572	211830722	65356	5,5	0,0	2,3	5,0	247	99	0.00248560039697	0.0558795648001	1.0,1.0	0.138,1.0	0.431
59632	ENSG00000148737.17	TCF7L2	chr10	+	113159919	113159992	113158666	113158717	113165554	113165632	59632	2,3	6,8	9,10	6,3	172	99	0.00249863603805	0.0561374102292	0.161,0.178	0.463,0.657	-0.391
66464	ENSG00000248712.8	CCDC153	chr11	-	119193150	119193885	119190709	119190840	119194922	119194994	66464	19,17	1,0	13,8	1,2	834	99	0.00249931831807	0.0561374102292	0.693,1.0	0.607,0.322	0.382
1200	ENSG00000180815.15	MAP3K15	chrX	-	19380119	19380277	19374476	19374660	19392001	19392107	1200	29,29	3,3	26,25	0,1	257	99	0.00250665646332	0.0562769172077	0.788,0.788	1.0,0.906	-0.165
79013	ENSG00000197912.16	SPG7	chr16	+	89540943	89541346	89532462	89532636	89544647	89544772	79013	166,156	124,117	70,74	97,83	502	99	0.00251891235422	0.0565266574196	0.209,0.208	0.125,0.15	0.071
71935	ENSG00000177853.15	ZNF518A	chr10	+	96203573	96203628	96133582	96133648	96203919	96204129	71935	1,0	0,2	2,1	0,0	154	99	0.00252049243282	0.0565367060481	1.0,0.0	1.0,1.0	-0.5
4020	ENSG00000101003.12	GINS1	chr20	+	25413789	25413854	25407672	25407895	25441701	25441776	4020	17,29	0,1	14,29	1,5	164	99	0.00252394677686	0.0565887680806	1.0,0.946	0.894,0.778	0.137
22640	ENSG00000160767.22	FAM189B	chr1	-	155250275	155250821	155248404	155248473	155251094	155251164	22640	182,143	0,0	246,207	4,3	645	99	0.002544632872	0.0570269586768	1.0,1.0	0.904,0.914	0.091
55921	ENSG00000250337.9	PURPL	chr5	+	27489281	27489386	27475534	27475695	27494234	27494335	55921	7,5	0,0	5,0	2,1	204	99	0.002546140312	0.0570351421797	1.0,1.0	0.548,0.0	0.726
28641	ENSG00000180098.9	TRNAU1AP	chr1	+	28574588	28574718	28571866	28571900	28577499	28577775	28641	25,19	54,57	9,18	89,72	229	99	0.00254757496739	0.0570416886533	0.167,0.126	0.042,0.098	0.077
78485	ENSG00000166747.13	AP1G1	chr16	-	71806685	71806728	71789278	71789482	71807800	71807838	78485	10,12	6,5	2,0	4,2	142	99	0.00255149459094	0.0571038442045	0.537,0.626	0.258,0.0	0.453
12055	ENSG00000257337.9	TNS2-AS1	chr12	-	53045586	53045653	53039873	53040263	53045960	53046031	12055	1,3	1,2	6,2	0,0	166	99	0.00255332691915	0.0571192501792	0.374,0.472	1.0,1.0	-0.577
79438	ENSG00000219200.12	RNASEK	chr17	+	7013318	7013535	7012647	7012761	7013665	7013742	79438	77,84	668,574	56,44	692,574	316	99	0.00255797635548	0.0571976343061	0.035,0.044	0.025,0.023	0.015
21312	ENSG00000099889.14	ARVCF	chr22	-	19971215	19971335	19969895	19970743	19971885	19971971	21312	71,41	15,7	34,30	16,17	219	99	0.00256054642438	0.0572294733732	0.682,0.726	0.49,0.444	0.237
67141	ENSG00000067182.9	TNFRSF1A	chr12	-	6330852	6330960	6330597	6330711	6333068	6333147	67141	166,169	2,2	239,161	10,8	207	99	0.00256969506651	0.0574082525127	0.975,0.976	0.92,0.906	0.063
54554	ENSG00000164830.19	OXR1	chr8	+	106737519	106737600	106713822	106713985	106739457	106739583	54554	51,56	55,41	37,23	58,53	180	99	0.00257289033533	0.0574539299344	0.338,0.429	0.26,0.193	0.157
8945	ENSG00000108039.18	XPNPEP1	chr10	-	109893011	109893075	109891578	109891826	109907690	109907815	8945	73,100	9,7	83,88	3,1	163	99	0.00257538609548	0.0574839531218	0.831,0.897	0.944,0.982	-0.099
55899	ENSG00000250337.9	PURPL	chr5	+	27476068	27476158	27475534	27475695	27494234	27494335	55899	1,6	0,0	2,2	2,1	189	99	0.002577492416	0.0575052608683	1.0,1.0	0.344,0.512	0.572
76290	ENSG00000185621.11	LMLN	chr3	+	198003014	198003125	197999265	197999342	198019252	198019385	76290	12,9	3,1	6,4	0,0	210	99	0.002589323089	0.057743408288	0.653,0.809	1.0,1.0	-0.269
19941	ENSG00000173950.16	XXYLT1	chr3	-	195175630	195175853	195156448	195156581	195180390	195180507	19941	15,22	2,2	10,9	0,0	322	99	0.00259238094251	0.0577802551513	0.698,0.772	1.0,1.0	-0.265
55051	ENSG00000254166.4	CASC19	chr8	-	127197474	127197564	127188044	127188115	127203162	127203220	55051	6,10	16,8	5,11	2,1	189	99	0.00259328977577	0.0577802551513	0.164,0.396	0.567,0.852	-0.429
67459	ENSG00000032742.18	IFT88	chr13	+	20567669	20567997	20567165	20567256	20574379	20574475	67459	51,56	25,22	22,23	20,26	427	99	0.00259489226167	0.0577901719525	0.321,0.371	0.203,0.17	0.159
29255	ENSG00000140992.19	PDPK1	chr16	+	2577424	2577500	2561479	2561522	2581294	2581363	29255	18,25	3,2	25,7	0,0	175	99	0.00259758946443	0.0578244491968	0.772,0.876	1.0,1.0	-0.176
18676	ENSG00000221817.12	PPP3CB-AS1	chr10	+	73498297	73498867	73496141	73496906	73499594	73499687	18676	82,80	0,1	60,49	1,4	669	99	0.0026023486711	0.0578783124002	1.0,0.922	0.899,0.644	0.19
32974	ENSG00000181458.10	TMEM45A	chr3	+	100570608	100574659	100568923	100568967	100576924	100577444	32974	24,32	32,33	39,41	149,173	4150	99	0.00260348660453	0.0578783124002	0.018,0.023	0.006,0.006	0.014
42260	ENSG00000119537.18	KDSR	chr18	-	63335256	63335358	63327725	63331901	63344409	63344493	42260	44,42	0,1	70,49	3,5	201	99	0.00260223802463	0.0578783124002	1.0,0.954	0.92,0.828	0.103
36242	ENSG00000162267.13	ITIH3	chr3	+	52805807	52805840	52803854	52804009	52806102	52806138	36242	1038,965	30,13	1567,1229	53,55	132	99	0.00260482891676	0.0578823821285	0.963,0.982	0.957,0.944	0.022
27748	ENSG00000183814.16	LIN9	chr1	-	226295841	226295946	226287663	226287797	226297718	226297813	27748	15,18	3,7	34,22	3,0	204	99	0.00261433543224	0.0580419664149	0.708,0.555	0.846,1.0	-0.292
82995	ENSG00000142453.12	CARM1	chr19	+	10921374	10921443	10921049	10921127	10921614	10921900	82995	167,139	57,62	117,88	71,67	168	99	0.00261398252415	0.0580419664149	0.633,0.569	0.493,0.436	0.136
58758	ENSG00000107331.18	ABCA2	chr9	-	137023837	137023840	137022940	137023052	137024142	137024236	58758	6,5	4,8	8,5	1,1	102	99	0.00261945432248	0.0581297661226	0.593,0.378	0.886,0.829	-0.372
43859	ENSG00000198075.10	SULT1C4	chr2	+	108382384	108382482	108381761	108381887	108383092	108383219	43859	23,20	6,6	10,3	0,1	197	99	0.00262112999449	0.0581411113971	0.658,0.626	1.0,0.601	-0.158
15271	ENSG00000141378.15	PTRH2	chr17	-	59698870	59700189	59697307	59697978	59707370	59707626	15271	163,219	105,133	266,173	223,200	1418	99	0.00262440840524	0.0581879822744	0.098,0.103	0.077,0.057	0.034
1207	ENSG00000044446.12	PHKA2	chrX	-	18900669	18900699	18897162	18897333	18901484	18901603	1207	75,73	20,6	66,57	34,21	129	99	0.00262940028918	0.0582727855477	0.742,0.903	0.598,0.676	0.185
39135	ENSG00000168137.20	SETD5	chr3	+	9433369	9433562	9429826	9430051	9433844	9433878	39135	133,121	17,18	47,38	18,11	292	99	0.00263448939456	0.0583596672404	0.726,0.695	0.47,0.539	0.206
1227	ENSG00000047634.15	SCML1	chrX	+	17745455	17745539	17744070	17744219	17746014	17746098	1227	16,18	7,7	8,2	12,5	183	99	0.00263892082374	0.0584319093792	0.553,0.582	0.265,0.178	0.346
33900	ENSG00000107745.20	MICU1	chr10	-	72379463	72379583	72375782	72375872	72407928	72408037	33900	20,28	267,244	12,8	295,187	219	99	0.00264581038459	0.05855849216	0.033,0.049	0.018,0.019	0.023
69131	ENSG00000091039.17	OSBPL8	chr12	-	76459858	76459895	76450850	76450988	76487509	76487618	69131	21,34	14,11	7,5	12,9	136	99	0.00266156901819	0.0588811708672	0.522,0.692	0.298,0.288	0.314
55042	ENSG00000254166.4	CASC19	chr8	-	127197474	127197564	127161829	127162084	127218809	127219237	55042	1,1	2,4	5,3	0,2	189	99	0.00266276984064	0.05888164788	0.208,0.116	1.0,0.44	-0.558
42035	ENSG00000214765.10	SEPTIN7P2	chr7	-	45728831	45729026	45727851	45728313	45736786	45736910	42035	31,27	62,51	9,12	49,47	294	99	0.00266480367139	0.058900536572	0.144,0.151	0.058,0.079	0.079
4181	ENSG00000125846.17	ZNF133	chr20	+	18305007	18305178	18297984	18298062	18305667	18305807	4181	42,37	1,0	10,12	3,1	270	99	0.00266764035676	0.0589371463068	0.939,1.0	0.55,0.815	0.287
76036	ENSG00000204334.8	ERICH2	chr2	+	170777146	170777177	170770377	170771187	170777376	170777425	76036	3,10	0,0	1,1	1,1	130	99	0.00267260599587	0.0590207386023	1.0,1.0	0.432,0.432	0.568
75329	ENSG00000241553.13	ARPC4	chr3	+	9799878	9800067	9797658	9797777	9800184	9800296	75329	18,39	249,242	15,9	253,192	288	99	0.00268409879013	0.0592483362909	0.024,0.052	0.02,0.016	0.02
60851	ENSG00000198646.14	NCOA6	chr20	-	34809452	34809522	34792449	34792563	34825471	34825651	60851	3,4	6,8	0,1	10,2	169	99	0.00268865065493	0.0593225876497	0.227,0.227	0.0,0.227	0.114
6650	ENSG00000089006.17	SNX5	chr20	-	17961139	17961326	17956932	17957037	17968374	17968794	6650	159,149	652,603	143,109	877,671	286	99	0.00269265989078	0.0593848060983	0.078,0.079	0.053,0.053	0.026
45501	ENSG00000124587.14	PEX6	chr6	-	42974874	42975038	42969884	42969987	42978268	42979150	45501	56,55	0,0	81,47	4,2	263	99	0.00269387847216	0.0593854507697	1.0,1.0	0.884,0.898	0.109
53075	ENSG00000177565.18	TBL1XR1	chr3	-	177098465	177098541	177053772	177053918	177197120	177197192	53075	19,13	0,5	15,4	0,0	175	99	0.00269877468193	0.0594671309106	1.0,0.595	1.0,1.0	-0.203
46028	ENSG00000162910.19	MRPL55	chr1	-	228108436	228108474	228108234	228108318	228109148	228109306	46028	14,4	3,3	9,3	14,13	137	99	0.00270088110312	0.059487293498	0.771,0.491	0.317,0.143	0.401
2742	ENSG00000157538.14	VPS26C	chr21	-	37233361	37233442	37232376	37232451	37267237	37267329	2742	70,68	6,7	68,30	1,1	180	99	0.00270788623753	0.0595890117788	0.865,0.842	0.974,0.943	-0.105
35643	ENSG00000068745.15	IP6K2	chr3	-	48715388	48715527	48694623	48695421	48717156	48717192	35643	71,67	195,182	72,66	123,98	238	99	0.00270782925518	0.0595890117788	0.132,0.133	0.196,0.219	-0.075
67710	ENSG00000130813.18	SHFL	chr19	+	10089110	10089378	10087250	10087300	10089656	10089695	67710	18,28	65,35	16,10	89,49	367	99	0.00271237328928	0.0596614584613	0.07,0.177	0.046,0.052	0.074
40512	ENSG00000203721.8	LINC00862	chr1	-	200368664	200368871	200342543	200342757	200373092	200373169	40512	22,22	1,3	14,5	6,4	306	99	0.00271963030952	0.0597947428378	0.877,0.703	0.43,0.288	0.431
557	ENSG00000248503.3	C4orf46P2	chrX	+	77922998	77923042	77910738	77910835	77962622	77964889	557	2,1	2,1	0,0	1,2	143	99	0.0027309926966	0.0600181321892	0.409,0.409	0.0,0.0	0.409
20935	ENSG00000280987.4	MATR3	chr5	+	139279934	139280058	139279050	139279129	139293452	139293575	20935	27,21	6,6	27,18	23,12	223	99	0.00273351316148	0.0600206885074	0.666,0.608	0.343,0.4	0.265
38623	ENSG00000145425.10	RPS3A	chr4	+	151100974	151101162	151099627	151099714	151102870	151102932	38623	6712,6586	43,34	18665,13420	44,41	287	99	0.00273251698392	0.0600206885074	0.982,0.985	0.993,0.991	-0.008
57711	ENSG00000136870.11	ZNF189	chr9	+	101399394	101399530	101399027	101399189	101399925	101400010	57711	78,82	26,17	62,34	34,24	235	99	0.00273474756074	0.0600213980023	0.558,0.67	0.434,0.374	0.21
28229	ENSG00000184014.9	DENND5A	chr11	-	9176771	9176902	9169922	9169949	9178131	9178366	28229	12,8	11,9	4,1	11,11	230	99	0.00274429454271	0.0602044687223	0.32,0.277	0.135,0.038	0.212
4776	ENSG00000167766.20	ZNF83	chr19	-	52616717	52616815	52614617	52614797	52618935	52619062	4776	63,50	10,13	13,14	6,15	197	99	0.00275413236325	0.0603581783768	0.76,0.659	0.521,0.319	0.289
54176	ENSG00000183808.12	RBM12B	chr8	-	93737306	93737355	93728154	93736438	93740880	93741017	54176	16,21	3,2	21,11	0,0	148	99	0.00275482727633	0.0603581783768	0.781,0.875	1.0,1.0	-0.172
82241	ENSG00000141627.14	DYM	chr18	-	49393644	49393742	49391592	49391645	49430254	49430447	82241	12,18	70,59	15,3	121,82	197	99	0.00275492757046	0.0603581783768	0.079,0.133	0.059,0.018	0.068
67532	ENSG00000247498.11	GPRC5D-AS1	chr12	+	12978940	12979021	12966758	12966857	12979523	12979622	67532	0,0	4,10	3,2	10,2	180	99	0.00276021572865	0.0604475138365	0.0,0.0	0.142,0.355	-0.248
5930	ENSG00000261824.8	LINC00662	chr19	-	27778710	27779043	27776325	27777638	27792999	27793232	5930	3,8	4,0	4,2	0,0	432	99	0.00276834155341	0.0605988873754	0.147,1.0	1.0,1.0	-0.426
15500	ENSG00000136518.17	ACTL6A	chr3	+	179575402	179575504	179574369	179574467	179576216	179576311	15500	16,9	91,97	3,7	129,95	201	99	0.00277210155339	0.0606546023937	0.08,0.044	0.011,0.035	0.039
60248	ENSG00000242086.8	MUC20-OT1	chr3	+	195686297	195686389	195685817	195685939	195688532	195688797	60248	4,3	1,0	6,1	3,1	191	99	0.00277747455495	0.0607455462125	0.675,1.0	0.509,0.341	0.412
24949	ENSG00000241468.8	ATP5MF	chr7	-	99459146	99459263	99458189	99458355	99460085	99460193	24949	1727,1739	18,22	3044,2304	74,39	216	99	0.00277920148267	0.0607567028158	0.978,0.973	0.95,0.964	0.019
76992	ENSG00000258867.8	LINC01146	chr14	+	88084036	88084483	88044614	88044848	88086827	88087164	76992	142,145	1,1	72,38	4,2	546	99	0.00278341715583	0.0608222328261	0.963,0.963	0.765,0.775	0.193
56858	ENSG00000204852.17	TCTN1	chr12	+	110635950	110636244	110634669	110634779	110636480	110636501	56858	5,8	27,25	1,1	22,23	393	99	0.00278775094421	0.0608902853873	0.045,0.075	0.011,0.011	0.049
64602	ENSG00000140545.16	MFGE8	chr15	-	88899655	88899811	88898682	88899532	88901550	88901735	64602	102,101	5,4	119,108	14,15	255	99	0.00280297048429	0.061195941955	0.888,0.907	0.767,0.737	0.145
1125	ENSG00000198947.18	DMD	chrX	-	31169442	31169601	31147274	31147518	31178668	31178805	1125	45,44	5,3	91,47	1,1	258	99	0.00280706732408	0.0612586007686	0.775,0.849	0.972,0.947	-0.147
63857	ENSG00000175224.17	ATG13	chr11	+	46625300	46625417	46618324	46618375	46629906	46630028	63857	6,2	2,1	2,1	0,0	216	99	0.00281367133756	0.0613758949566	0.579,0.478	1.0,1.0	-0.472
49993	ENSG00000244026.8	FAM86DP	chr3	-	75427774	75427908	75426449	75426599	75429135	75429237	49993	4,9	0,3	0,3	1,5	233	99	0.00281894668044	0.0614641164633	1.0,0.56	0.0,0.203	0.678
32878	ENSG00000138709.19	LARP1B	chr4	+	128179405	128179512	128162193	128162317	128199438	128199599	32878	43,37	0,0	38,18	1,4	206	99	0.0028230805517	0.0615273832505	1.0,1.0	0.948,0.684	0.184
58768	ENSG00000132005.9	RFX1	chr19	-	13993524	13993895	13983485	13983595	14006102	14006267	58768	8,6	0,4	3,4	0,0	470	99	0.00282804051881	0.0616085912499	1.0,0.24	1.0,1.0	-0.38
1610	ENSG00000100401.20	RANGAP1	chr22	-	41284900	41285153	41280932	41281082	41285543	41285965	1610	51,41	4,1	16,16	0,0	352	99	0.00283041052282	0.0616333309267	0.782,0.92	1.0,1.0	-0.149
56961	ENSG00000137337.16	MDC1	chr6	-	30707565	30708357	30707383	30707454	30711411	30711504	56961	476,441	5,1	283,216	9,4	891	99	0.00283601116561	0.0617283668309	0.914,0.98	0.777,0.857	0.13
45204	ENSG00000149761.9	NUDT22	chr11	+	64227400	64227493	64226608	64227132	64227567	64227666	45204	6,2	22,28	0,0	19,18	192	99	0.00283934389472	0.0617516215198	0.123,0.036	0.0,0.0	0.08
71212	ENSG00000188002.12	PDCD6P1	chr5	-	1626785	1626926	1602690	1602735	1632844	1632906	71212	26,36	1,4	22,14	0,0	240	99	0.00283955304339	0.0617516215198	0.915,0.788	1.0,1.0	-0.148
55396	ENSG00000122483.18	CCDC18	chr1	+	93218502	93218652	93217737	93217869	93221608	93221743	55396	3,3	6,10	0,0	8,6	249	99	0.0028408349963	0.0617526043536	0.166,0.107	0.0,0.0	0.137
1480	ENSG00000054611.14	TBC1D22A	chr22	+	46913333	46913446	46912073	46912188	46997633	46997709	1480	2,3	4,5	0,0	4,2	212	99	0.00284919643604	0.0619074095944	0.189,0.219	0.0,0.0	0.204
73452	ENSG00000187097.13	ENTPD5	chr14	-	74007695	74007812	73987885	73988172	74011090	74011150	73452	9,14	26,23	3,1	18,15	216	99	0.00285915896728	0.0620968535865	0.137,0.218	0.071,0.03	0.127
5571	ENSG00000104824.18	HNRNPL	chr19	-	38841612	38841682	38840487	38840559	38843841	38843914	5571	29,29	656,612	82,37	808,656	169	99	0.00286238189282	0.0621252541171	0.025,0.027	0.056,0.032	-0.018
16355	ENSG00000109670.16	FBXW7	chr4	-	152412479	152412529	152411159	152411872	152534940	152535033	16355	3,6	14,7	1,0	6,3	149	99	0.00286295507247	0.0621252541171	0.125,0.363	0.1,0.0	0.194
2085	ENSG00000183765.23	CHEK2	chr22	-	28730455	28730548	28725242	28725367	28734402	28734727	2085	6,13	47,53	6,2	76,69	192	99	0.00287910233423	0.0622935155505	0.062,0.112	0.039,0.015	0.06
20309	ENSG00000152133.17	GPATCH11	chr2	+	37089639	37089866	37088368	37088440	37091915	37092036	20309	74,72	7,7	76,60	2,1	326	99	0.00287465172285	0.0622935155505	0.762,0.757	0.92,0.948	-0.174
35591	ENSG00000158887.19	MPZ	chr1	-	161306707	161306921	161306328	161306464	161307257	161307424	35591	92,67	6,6	243,198	3,5	313	99	0.00288296046499	0.0622935155505	0.829,0.779	0.962,0.926	-0.14
41858	ENSG00000144043.12	TEX261	chr2	-	70991829	70991983	70989576	70989816	70993695	70993775	41858	362,363	6,15	448,306	25,23	253	99	0.00287243539351	0.0622935155505	0.959,0.904	0.875,0.839	0.075
46611	ENSG00000128641.19	MYO1B	chr2	+	191400748	191400835	191400381	191400468	191408114	191408189	46611	95,107	56,39	75,50	74,43	186	99	0.00287544091941	0.0622935155505	0.474,0.594	0.35,0.382	0.168
47442	ENSG00000144130.12	NT5DC4	chr2	+	112726677	112726738	112726237	112726289	112729626	112729704	47442	16,7	2,0	6,4	3,3	160	99	0.00288289753229	0.0622935155505	0.832,1.0	0.553,0.452	0.413
55049	ENSG00000254166.4	CASC19	chr8	-	127197474	127197564	127187784	127187884	127218809	127219237	55049	0,1	5,1	4,2	2,3	189	99	0.00287573292602	0.0622935155505	0.0,0.344	0.512,0.259	-0.214
57270	ENSG00000090054.16	SPTLC1	chr9	-	92070123	92070296	92067965	92068098	92076797	92077035	57270	12,12	0,4	4,0	2,4	272	99	0.00287768684617	0.0622935155505	1.0,0.522	0.421,0.0	0.55
59429	ENSG00000150867.14	PIP4K2A	chr10	-	22591628	22591781	22573310	22573457	22607926	22608023	59429	85,111	6,1	55,49	0,0	252	99	0.00288355215063	0.0622935155505	0.848,0.978	1.0,1.0	-0.087
79612	ENSG00000108510.10	MED13	chr17	-	61955679	61955838	61955381	61955567	61956338	61956481	79612	263,259	3,1	204,144	8,4	258	99	0.00288443267615	0.0622935155505	0.971,0.99	0.907,0.932	0.061
82522	ENSG00000141759.15	TXNL4A	chr18	-	79979332	79979640	79977601	79977701	79988239	79988537	82522	20,19	250,218	9,8	347,265	407	99	0.00288007171231	0.0622935155505	0.019,0.021	0.006,0.007	0.013
4184	ENSG00000125846.17	ZNF133	chr20	+	18305007	18305178	18298288	18298464	18305680	18305807	4184	46,39	2,0	15,22	3,3	270	99	0.00288638026725	0.0623086265128	0.894,1.0	0.647,0.729	0.259
57051	ENSG00000255036.6	SUGT1P4-STRA6LP-CCDC180	chr9	+	97350408	97350555	97343339	97343563	97354568	97354713	57051	9,16	1,6	8,5	1,0	246	99	0.00288989415098	0.0623305852495	0.784,0.518	0.763,1.0	-0.23
64954	ENSG00000162337.12	LRP5	chr11	+	68445572	68445686	68439872	68439916	68446435	68446533	64954	11,13	175,173	3,3	161,134	213	99	0.00288905562821	0.0623305852495	0.028,0.034	0.009,0.01	0.021
32987	ENSG00000171574.18	ZNF584	chr19	+	58415818	58415940	58415523	58415646	58416810	58417091	32987	7,1	6,9	0,2	21,10	221	99	0.00289785782429	0.0624753622732	0.343,0.047	0.0,0.082	0.154
37686	ENSG00000225210.10	DUXAP9	chr14	+	19066000	19066115	19062402	19062466	19066235	19066347	37686	48,53	6,3	36,14	10,7	214	99	0.00290046327246	0.0624775805251	0.787,0.891	0.625,0.481	0.286
83288	ENSG00000221983.8	UBA52	chr19	+	18572350	18572607	18571854	18571887	18573292	18573403	83288	90,119	1003,955	152,99	2032,1548	356	99	0.00290022366265	0.0624775805251	0.024,0.033	0.02,0.017	0.01
72291	ENSG00000117419.16	ERI3	chr1	-	44241914	44242080	44221503	44221640	44247938	44248002	72291	8,12	128,117	4,4	213,142	265	99	0.00290714428688	0.0625944896025	0.023,0.037	0.007,0.01	0.021
45899	ENSG00000205423.12	CNEP1R1	chr16	+	50025650	50025701	50024409	50025340	50026395	50026467	45899	38,32	32,39	50,34	25,11	150	99	0.00291308475597	0.0626953598924	0.439,0.351	0.569,0.671	-0.225
513	ENSG00000271147.8	ARMCX5-GPRASP2	chrX	+	102601879	102601977	102601463	102601509	102605481	102605653	513	31,32	0,2	25,22	5,3	197	99	0.00292337297059	0.062773397349	1.0,0.889	0.715,0.787	0.194
9582	ENSG00000106415.13	GLCCI1	chr7	+	8084896	8085017	8070920	8071131	8086192	8089080	9582	38,45	0,2	13,10	3,2	220	99	0.00292366616667	0.062773397349	1.0,0.91	0.661,0.692	0.279
25887	ENSG00000161040.18	FBXL13	chr7	-	103046808	103047020	103029350	103029418	103055643	103055747	25887	2,5	1,2	4,4	0,1	311	99	0.00292381019128	0.062773397349	0.389,0.443	1.0,0.56	-0.364
43644	ENSG00000116209.12	TMEM59	chr1	-	54045691	54045786	54043372	54043525	54052999	54053204	43644	822,814	3,5	1081,673	11,15	194	99	0.00291851741457	0.062773397349	0.993,0.988	0.98,0.958	0.021
49661	ENSG00000112972.15	HMGCS1	chr5	-	43307765	43307824	43298445	43298975	43313021	43313224	49661	689,653	16,13	854,632	7,5	158	99	0.00292425391508	0.062773397349	0.964,0.969	0.987,0.988	-0.021
52332	ENSG00000125885.13	MCM8	chr20	+	5972575	5972726	5972006	5972037	5973055	5973196	52332	22,7	61,65	4,2	54,30	250	99	0.00292087024027	0.062773397349	0.125,0.041	0.028,0.026	0.056
36945	ENSG00000187187.14	ZNF546	chr19	+	39998247	39998410	39997860	39997915	40006095	40006182	36945	9,6	2,1	3,4	0,0	262	99	0.00292567240347	0.062776858091	0.63,0.694	1.0,1.0	-0.338
73724	ENSG00000015133.20	CCDC88C	chr14	-	91285394	91285836	91283328	91283517	91289104	91289331	73724	9,10	21,10	0,2	11,3	541	99	0.00292727551492	0.0627842756596	0.073,0.155	0.0,0.109	0.059
74222	ENSG00000203485.14	INF2	chr14	+	104715832	104716017	104715283	104715340	104718794	104719603	74222	18,11	7,0	16,27	26,36	284	99	0.00292996729356	0.0628150265928	0.473,1.0	0.177,0.207	0.544
7306	ENSG00000172765.19	TMCC1	chr3	-	129867009	129867098	129832757	129832826	129880308	129880559	7306	4,3	13,14	0,0	6,4	188	99	0.00293535009425	0.0629034186936	0.139,0.101	0.0,0.0	0.12
12590	ENSG00000105341.19	DMAC2	chr19	-	41433271	41433434	41431317	41432408	41433536	41433673	12590	158,142	12,21	197,143	38,47	262	99	0.00294231324908	0.0629715571538	0.833,0.719	0.662,0.535	0.177
41597	ENSG00000067113.17	PLPP1	chr5	-	55490959	55491114	55475298	55475450	55534571	55534951	41597	0,0	11,25	2,6	22,17	254	99	0.00294149625519	0.0629715571538	0.0,0.0	0.034,0.121	-0.077
44987	ENSG00000105426.18	PTPRS	chr19	-	5216719	5216767	5215497	5215595	5218419	5218532	44987	29,35	204,208	6,10	138,94	147	99	0.00294034880817	0.0629715571538	0.087,0.102	0.028,0.067	0.047
56143	ENSG00000166908.18	PIP4K2C	chr12	+	57599399	57599438	57599064	57599211	57600323	57600436	56143	103,81	1,5	61,46	8,6	138	99	0.00295528029924	0.0632219797007	0.987,0.921	0.845,0.846	0.109
39644	ENSG00000158201.10	ABHD3	chr18	-	21683919	21683965	21663677	21664230	21702315	21702498	39644	104,90	3,9	133,89	2,1	145	99	0.00296517080511	0.0633792566224	0.959,0.872	0.978,0.984	-0.066
69195	ENSG00000075826.17	SEC31B	chr10	-	100507424	100507567	100506320	100506420	100507907	100508048	69195	24,23	0,0	19,8	2,2	242	99	0.00296474082091	0.0633792566224	1.0,1.0	0.795,0.621	0.292
15541	ENSG00000166278.16	C2	chr6	+	31935922	31936061	31933866	31933965	31937318	31937459	15541	2287,2236	14,16	3291,2689	42,35	238	99	0.00298539136512	0.0637841575746	0.985,0.983	0.97,0.97	0.014
28568	ENSG00000164306.11	PRIMPOL	chr4	+	184685411	184685498	184672172	184672460	184685575	184685684	28568	13,15	2,2	20,11	0,0	186	99	0.00299067781143	0.0638697749369	0.776,0.8	1.0,1.0	-0.212
11400	ENSG00000267374.3	MIR924HG	chr18	-	39327765	39327951	39208598	39208789	39388428	39388527	11400	1,4	4,0	4,2	0,0	285	99	0.00299481128441	0.0639230254204	0.08,1.0	1.0,1.0	-0.46
63425	ENSG00000169519.21	METTL15	chr11	+	28328094	28328165	28296752	28296931	28352089	28352158	63425	2,0	6,4	4,1	1,1	170	99	0.00299573169942	0.0639230254204	0.163,0.0	0.7,0.368	-0.453
8177	ENSG00000175592.9	FOSL1	chr11	-	65894013	65894116	65892644	65893296	65896808	65897006	8177	10,20	1,0	10,4	2,2	202	99	0.00299815574696	0.0639474218716	0.831,1.0	0.71,0.495	0.313
77621	ENSG00000213468.7	FIRRE	chrX	-	131804971	131805037	131795049	131796331	131825221	131825365	77621	11,18	2,4	11,9	1,0	165	99	0.00300106172663	0.0639820721914	0.767,0.73	0.868,1.0	-0.185
[truncated: 47,932 more rows]
