# Supplementary material for: Competition for the conserved branch point sequence influences physiological outcomes in pre-mRNA splicing
Source: bioRxiv preprint, doi:10.1101/2024.10.09.617384, version 2 (2025-10-08)
Supplement: Suppl Table S3 [file 617384_file05.xlsx]

## Sheet: SE.MATS.JCEC
ID	GeneID	geneSymbol	chr	strand	exonStart_0base	exonEnd	upstreamES	upstreamEE	downstreamES	downstreamEE	ID	IJC_SAMPLE_1	SJC_SAMPLE_1	IJC_SAMPLE_2	SJC_SAMPLE_2	IncFormLen	SkipFormLen	PValue	FDR	IncLevel1	IncLevel2	IncLevelDifference
6693	ENSG00000122786.20	CALD1	chr7	+	134935687	134935765	134932987	134933390	134941091	134941237	6693	62,29	570,397	119,77	251,222	178	100	0	0.0	0.058,0.039	0.21,0.163	-0.138
9731	ENSG00000135317.14	SNX14	chr6	-	85538837	85538864	85536791	85536924	85541984	85542043	9731	436,539	255,350	174,330	347,929	127	100	0	0.0	0.574,0.548	0.283,0.219	0.31
13819	ENSG00000112851.16	ERBIN	chr5	+	66072168	66072291	66053405	66054951	66075023	66075230	13819	36,55	233,231	2,8	186,395	223	100	0	0.0	0.065,0.096	0.005,0.009	0.074
14422	ENSG00000141378.15	PTRH2	chr17	-	59698870	59700189	59697307	59697978	59707370	59707626	14422	220,216	217,271	257,250	84,79	1419	100	0	0.0	0.067,0.053	0.177,0.182	-0.119
18941	ENSG00000074964.17	ARHGEF10L	chr1	+	17634547	17634562	17632320	17632466	17634834	17635016	18941	9,3	61,52	33,26	16,10	115	100	0	0.0	0.114,0.048	0.642,0.693	-0.587
31925	ENSG00000132780.17	NASP	chr1	+	45607320	45608337	45606481	45606591	45613168	45613248	31925	9248,8740	334,360	5493,6682	505,750	1117	100	0	0.0	0.713,0.685	0.493,0.444	0.231
34218	ENSG00000162267.13	ITIH3	chr3	+	52805807	52805840	52804725	52804734	52806102	52806138	34218	911,905	109,129	1323,1546	28,58	133	100	0	0.0	0.863,0.841	0.973,0.952	-0.11
34616	ENSG00000155906.20	RMND1	chr6	-	151408642	151408900	151405719	151405836	151417278	151417399	34616	67,42	180,145	9,16	240,424	358	100	0	0.0	0.094,0.075	0.01,0.01	0.074
37633	ENSG00000102038.16	SMARCA1	chrX	-	129493039	129493075	129491940	129492093	129496749	129496871	37633	484,553	34,47	293,404	118,170	136	100	0	0.0	0.913,0.896	0.646,0.636	0.264
46978	ENSG00000123562.18	MORF4L2	chrX	-	103684680	103684729	103678498	103678651	103685170	103685260	46978	178,205	161,149	195,270	32,56	149	100	0	0.0	0.426,0.48	0.804,0.764	-0.331
54836	ENSG00000106927.12	AMBP	chr9	-	114069698	114069906	114062676	114062758	114072924	114073026	54836	2180,1662	96,113	3044,1009	24,9	308	100	0	0.0	0.881,0.827	0.976,0.973	-0.12
59872	ENSG00000110321.19	EIF4G2	chr11	-	10801660	10801774	10800961	10801087	10802048	10802209	59872	3788,3468	595,585	2338,3164	142,140	214	100	0	0.0	0.748,0.735	0.885,0.914	-0.158
60800	ENSG00000198561.16	CTNND1	chr11	+	57791384	57791673	57761796	57762046	57794009	57794081	60800	777,600	309,295	226,158	328,406	389	100	0	0.0	0.393,0.343	0.15,0.091	0.247
60806	ENSG00000198561.16	CTNND1	chr11	+	57791491	57791673	57761800	57762046	57794009	57794081	60806	684,544	309,295	160,136	328,406	282	100	0	0.0	0.44,0.395	0.147,0.106	0.291
60807	ENSG00000198561.16	CTNND1	chr11	+	57791493	57791673	57761796	57762046	57794009	57794081	60807	684,543	309,295	160,136	328,406	280	100	0	0.0	0.442,0.397	0.148,0.107	0.292
61141	ENSG00000072518.22	MARK2	chr11	+	63906087	63907567	63904785	63905043	63908259	63908304	61141	77,66	27,32	23,10	59,55	1580	100	0	0.0	0.153,0.115	0.024,0.011	0.117
63587	ENSG00000060237.19	WNK1	chr12	+	867865	869104	862082	862270	871264	871348	63587	39,68	171,211	50,94	29,63	1339	100	0	0.0	0.017,0.024	0.114,0.1	-0.087
68944	ENSG00000196792.12	STRN3	chr14	-	30929200	30929311	30913523	30913657	30935162	30935304	68944	500,465	96,85	269,204	177,129	211	100	0	0.0	0.712,0.722	0.419,0.428	0.293
73711	ENSG00000169592.15	INO80E	chr16	+	29996807	29996860	29996243	29996617	30000757	30000812	73711	254,260	87,88	199,250	4,17	153	100	0	0.0	0.656,0.659	0.97,0.906	-0.28
30562	ENSG00000248508.10	SRP14-DT	chr15	+	40046861	40047221	40045960	40046069	40064295	40064601	30562	6,13	2,5	9,6	0,0	460	100	8.91293957306e-07	0.000101396797616	0.395,0.361	1.0,1.0	-0.622
555	ENSG00000248503.3	C4orf46P2	chrX	+	77922998	77923042	77910738	77910835	77962622	77964889	555	5,4	0,1	0,3	4,8	144	100	9.19969658564e-07	0.000104211631621	1.0,0.735	0.0,0.207	0.764
74619	ENSG00000118557.16	PMFBP1	chr16	-	72150607	72150829	72140411	72140582	72154210	72154459	74619	8,18	5,6	4,2	0,0	322	100	9.21015256172e-07	0.000104211631621	0.332,0.482	1.0,1.0	-0.593
47800	ENSG00000173402.13	DAG1	chr3	+	49492822	49492973	49488697	49488745	49510418	49510819	47800	4,3	1,0	1,0	2,4	251	100	9.29746201472e-07	0.000104915969608	0.614,1.0	0.166,0.0	0.724
45059	ENSG00000089682.17	RBM41	chrX	-	107116150	107116244	107115861	107116054	107116649	107116768	45059	0,0	15,11	2,9	4,7	194	100	9.44166419381e-07	0.000106256793407	0.0,0.0	0.205,0.399	-0.302
50743	ENSG00000181690.8	PLAG1	chr8	-	56179408	56179513	56171090	56171189	56211120	56211273	50743	4,5	3,3	0,0	9,9	205	100	9.80050441246e-07	0.000109999495235	0.394,0.448	0.0,0.0	0.421
19686	ENSG00000147526.20	TACC1	chr8	+	38819521	38820635	38757280	38757409	38825307	38825368	19686	579,501	9,7	504,439	0,0	1214	100	1.00919114898e-06	0.000112925576442	0.841,0.855	1.0,1.0	-0.152
61513	ENSG00000172932.16	ANKRD13D	chr11	+	67299057	67299124	67291990	67292180	67299529	67299611	61513	59,54	12,14	78,108	4,2	167	100	1.01151537479e-06	0.000112925576442	0.746,0.698	0.921,0.97	-0.224
18528	ENSG00000104852.15	SNRNP70	chr19	+	49102113	49102173	49101389	49101471	49104633	49104735	18528	96,148	808,896	47,37	494,829	160	100	1.01915527484e-06	0.000113174895441	0.069,0.094	0.056,0.027	0.04
75083	ENSG00000197912.16	SPG7	chr16	+	89545871	89546030	89543575	89544772	89546657	89546760	75083	0,1	105,93	6,12	70,25	259	100	1.01745052383e-06	0.000113174895441	0.0,0.004	0.032,0.156	-0.092
73779	ENSG00000080603.17	SRCAP	chr16	+	30721188	30721476	30720712	30720978	30722121	30722286	73779	676,694	2,6	128,41	10,2	388	100	1.0286729023e-06	0.000113929605965	0.989,0.968	0.767,0.841	0.174
5130	ENSG00000090006.18	LTBP4	chr19	+	40622949	40623021	40622400	40622667	40623603	40623732	5130	11,2	8,1	6,2	0,0	172	100	1.03281937003e-06	0.000114087026191	0.444,0.538	1.0,1.0	-0.509
1315	ENSG00000157399.17	ARSL	chrX	-	2959602	2959888	2958273	2958423	2960377	2960420	1315	19,19	7,3	4,10	0,0	386	100	1.04882141028e-06	0.000115455379629	0.413,0.621	1.0,1.0	-0.483
12286	ENSG00000121022.14	COPS5	chr8	-	67047684	67047859	67045811	67045960	67051229	67051341	12286	37,56	36,42	17,25	71,50	275	100	1.05348035395e-06	0.000115455379629	0.272,0.327	0.08,0.154	0.182
76359	ENSG00000073584.20	SMARCE1	chr17	-	40630207	40630286	40627780	40629568	40630713	40630924	76359	9,5	6,2	1,8	0,0	179	100	1.05205175926e-06	0.000115455379629	0.456,0.583	1.0,1.0	-0.481
22156	ENSG00000107164.17	FUBP3	chr9	+	130631160	130631293	130630627	130630788	130631556	130631630	22156	34,45	211,366	14,15	18,28	233	100	1.07014910222e-06	0.000116671333762	0.065,0.05	0.25,0.187	-0.161
45982	ENSG00000169371.14	SNUPN	chr15	-	75622341	75622490	75620893	75621056	75625335	75625638	45982	9,19	5,5	8,8	0,0	249	100	1.07014120221e-06	0.000116671333762	0.42,0.604	1.0,1.0	-0.488
37553	ENSG00000197323.12	TRIM33	chr1	-	114397939	114397990	114392789	114397860	114399456	114399609	37553	159,155	83,91	171,178	36,44	151	100	1.07529928028e-06	0.000116928323036	0.559,0.53	0.759,0.728	-0.199
56592	ENSG00000095787.25	WAC	chr10	+	28595694	28596041	28590719	28590832	28608185	28608593	56592	2774,3644	92,108	878,2077	6,31	447	100	1.10076051263e-06	0.000119386888242	0.871,0.883	0.97,0.937	-0.077
4775	ENSG00000105483.18	CARD8	chr19	-	48223718	48223868	48221729	48221855	48230437	48230498	4775	48,70	19,14	8,13	9,30	250	100	1.12950255637e-06	0.000122131112073	0.503,0.667	0.262,0.148	0.38
13572	ENSG00000233184.9	DPH5-DT	chr1	+	101077362	101077508	101025849	101026061	101086851	101087265	13572	2,1	2,2	11,1	0,0	246	100	1.1318970855e-06	0.000122131112073	0.289,0.169	1.0,1.0	-0.771
67974	ENSG00000005810.20	MYCBP2	chr13	-	77129155	77129230	77126317	77126542	77139195	77139336	67974	4,3	12,7	11,8	0,2	175	100	1.15957258728e-06	0.000124795646186	0.16,0.197	1.0,0.696	-0.669
78954	ENSG00000142453.12	CARM1	chr19	+	10908549	10908747	10908038	10908145	10909102	10909207	78954	36,36	91,66	2,6	50,37	298	100	1.17890152451e-06	0.00012655054442	0.117,0.155	0.013,0.052	0.104
11495	ENSG00000141552.18	ANAPC11	chr17	+	81893551	81893614	81891740	81891863	81894466	81894586	11495	90,64	16,11	121,56	4,0	163	100	1.20162097605e-06	0.000128659494021	0.775,0.781	0.949,1.0	-0.196
21868	ENSG00000114268.12	PFKFB4	chr3	-	48548531	48548659	48539696	48539771	48549863	48549895	21868	34,26	0,0	7,37	1,9	228	100	1.22531706237e-06	0.000130861986776	1.0,1.0	0.754,0.643	0.301
64151	ENSG00000144285.23	SCN1A	chr2	-	166007229	166007293	166002471	166002753	166009718	166009841	64151	29,21	19,13	4,0	22,3	164	100	1.29302595897e-06	0.000137741811125	0.482,0.496	0.1,0.0	0.439
27318	ENSG00000119801.13	YPEL5	chr2	+	30148244	30148305	30147006	30147062	30156627	30156792	27318	28,35	111,121	7,7	137,72	161	100	1.30938491627e-06	0.000138859512865	0.135,0.152	0.031,0.057	0.1
44176	ENSG00000154556.20	SORBS2	chr4	-	185684753	185684842	185678795	185678822	185690561	185690611	44176	39,61	30,38	11,23	22,62	189	100	1.31015185911e-06	0.000138859512865	0.408,0.459	0.209,0.164	0.247
44890	ENSG00000128739.23	SNRPN	chr15	+	24967028	24967240	24962113	24962209	24967931	24968082	44890	98,85	1195,688	59,113	549,208	312	100	1.32126460073e-06	0.000139683693206	0.026,0.038	0.033,0.148	-0.058
74697	ENSG00000103091.15	WDR59	chr16	-	74889702	74889815	74886269	74886396	74892483	74892565	74697	56,38	10,6	39,20	0,0	213	100	1.36043072041e-06	0.000143462045617	0.724,0.748	1.0,1.0	-0.264
12238	ENSG00000145868.17	FBXO38	chr5	+	148427212	148427947	148425521	148425701	148433423	148433524	12238	343,359	4,5	233,179	17,12	835	100	1.36870662759e-06	0.000143972118	0.911,0.896	0.621,0.641	0.272
24539	ENSG00000142599.19	RERE	chr1	-	8614560	8614686	8557417	8557523	8624309	8624380	24539	131,129	7,8	63,121	21,26	226	100	1.38810940287e-06	0.000145647118173	0.892,0.877	0.57,0.673	0.263
78934	ENSG00000129351.18	ILF3	chr19	+	10678612	10678704	10677162	10677310	10679096	10679170	78934	535,431	23,26	337,534	3,7	192	100	1.40036815233e-06	0.000146566031743	0.924,0.896	0.983,0.975	-0.069
76313	ENSG00000198081.11	ZBTB14	chr18	-	5293971	5294001	5293243	5293327	5295812	5296040	76313	4,3	2,1	0,0	2,2	130	100	1.42949961324e-06	0.000149241898524	0.606,0.698	0.0,0.0	0.652
18155	ENSG00000154040.21	CABYR	chr18	+	24143090	24143259	24139016	24139118	24155700	24156042	18155	10,10	5,2	1,2	0,0	269	100	1.43995761259e-06	0.000149959764804	0.426,0.65	1.0,1.0	-0.462
76542	ENSG00000073969.18	NSF	chr17	+	46755498	46755597	46755313	46755369	46755801	46755837	76542	15,5	82,66	1,2	190,99	199	100	1.45775833504e-06	0.000151436855326	0.084,0.037	0.003,0.01	0.054
29142	ENSG00000079819.19	EPB41L2	chr6	-	130878103	130878250	130869562	130870126	130885095	130885268	29142	104,72	96,110	103,116	352,273	247	100	1.48724670301e-06	0.000153892013113	0.305,0.209	0.106,0.147	0.131
29546	ENSG00000079974.19	RABL2B	chr22	-	50783038	50783286	50782187	50782351	50783500	50783636	29546	20,17	6,3	8,10	0,0	348	100	1.49241985725e-06	0.000153892013113	0.489,0.62	1.0,1.0	-0.446
59447	ENSG00000205531.13	NAP1L4	chr11	-	2949226	2949264	2944436	2945646	2951258	2951315	59447	256,299	255,265	189,247	315,459	138	100	1.49044197284e-06	0.000153892013113	0.421,0.45	0.303,0.281	0.143
2718	ENSG00000159110.22	IFNAR2	chr21	+	33260596	33260727	33252661	33252830	33262792	33262855	2718	60,70	10,6	67,80	0,1	231	100	1.53588750906e-06	0.000157985087388	0.722,0.835	1.0,0.972	-0.208
76177	ENSG00000278259.5	MYO19	chr17	-	36512657	36512779	36511364	36511455	36513428	36513457	76177	11,3	24,9	0,0	24,20	222	100	1.5493281551e-06	0.00015897701768	0.171,0.131	0.0,0.0	0.151
53975	ENSG00000137337.16	MDC1	chr6	-	30707565	30708357	30707383	30707454	30711411	30711504	53975	1124,1113	17,19	670,967	2,2	892	100	1.55758324083e-06	0.000159433306546	0.881,0.868	0.974,0.982	-0.103
35686	ENSG00000183530.14	PRR14L	chr22	-	31688155	31688227	31681346	31685803	31701655	31701762	35686	44,62	0,1	29,25	4,8	172	100	1.57029866832e-06	0.000160342814022	1.0,0.973	0.808,0.645	0.26
22311	ENSG00000230606.11	LINC02969	chr2	-	97423801	97423918	97423176	97423272	97425877	97426058	22311	16,13	8,2	0,0	1,3	217	100	1.57811445056e-06	0.000160748811369	0.48,0.75	0.0,0.0	0.615
37004	ENSG00000168137.20	SETD5	chr3	+	9474793	9474971	9474448	9474582	9475067	9475265	37004	29,31	103,139	35,50	43,74	278	100	1.62744717069e-06	0.000165371543206	0.092,0.074	0.226,0.196	-0.128
64355	ENSG00000050748.18	MAPK9	chr5	-	180279795	180280036	180269279	180269409	180280439	180280581	64355	35,28	49,42	8,9	71,32	341	100	1.63279330145e-06	0.000165513054637	0.173,0.164	0.032,0.076	0.114
27860	ENSG00000118961.15	LDAH	chr2	-	20801309	20801465	20790254	20790398	20823036	20823101	27860	16,8	10,1	21,8	0,0	256	100	1.67044464972e-06	0.000168920689035	0.385,0.758	1.0,1.0	-0.428
48137	ENSG00000140455.17	USP3	chr15	+	63533802	63533918	63532646	63532707	63537024	63537156	48137	16,25	89,54	2,0	28,40	216	100	1.6750065166e-06	0.000168973850163	0.077,0.177	0.032,0.0	0.111
19630	ENSG00000179532.13	DNHD1	chr11	+	6547862	6548040	6544791	6547666	6548209	6548402	19630	4,4	2,3	1,4	0,0	278	100	1.70085110018e-06	0.000170865324159	0.418,0.324	1.0,1.0	-0.629
63442	ENSG00000140479.18	PCSK6	chr15	-	101305105	101305355	101300749	101300869	101307212	101307325	63442	477,393	5,6	174,128	9,15	350	100	1.7019190296e-06	0.000170865324159	0.965,0.949	0.847,0.709	0.179
72437	ENSG00000148950.11	IMMP1L	chr11	-	31456259	31456386	31433459	31433570	31509518	31509563	72437	11,7	5,7	4,2	43,13	227	100	1.72091539163e-06	0.000172359145623	0.492,0.306	0.039,0.063	0.348
49185	ENSG00000139209.16	SLC38A4	chr12	-	46803602	46803794	46792952	46793183	46824305	46824385	49185	12,20	2,6	11,19	0,0	292	100	1.73315464647e-06	0.000173170690393	0.673,0.533	1.0,1.0	-0.397
34200	ENSG00000155542.12	SETD9	chr5	+	56911168	56911502	56909623	56909743	56913010	56913116	34200	21,7	4,2	12,24	0,0	434	100	1.74076805093e-06	0.000173517272505	0.547,0.446	1.0,1.0	-0.503
43617	ENSG00000128656.15	CHN1	chr2	-	174875787	174875865	174846879	174846957	174877839	174877941	43617	12,6	15,8	1,2	23,25	178	100	1.75461239205e-06	0.000174481823737	0.31,0.296	0.024,0.043	0.269
821	ENSG00000158571.11	PFKFB1	chrX	-	54960823	54960851	54959826	54959893	54963256	54963382	821	2,3	3,3	3,2	0,0	128	100	1.76950508446e-06	0.000174808088827	0.342,0.439	1.0,1.0	-0.609
18806	ENSG00000125944.21	HNRNPR	chr1	-	23340851	23341020	23338489	23338608	23344210	23344322	18806	404,386	107,89	321,303	39,28	269	100	1.77041991312e-06	0.000174808088827	0.584,0.617	0.754,0.801	-0.177
37706	ENSG00000111877.18	MCM9	chr6	-	118932606	118932740	118931419	118931738	118934890	118935024	37706	5,2	0,0	12,0	4,2	234	100	1.76847106348e-06	0.000174808088827	1.0,1.0	0.562,0.0	0.719
13843	ENSG00000113595.15	TRIM23	chr5	-	65613726	65613855	65611669	65611881	65614097	65614219	13843	0,0	1,1	4,4	0,2	229	100	1.79166618042e-06	0.000176489657984	0.0,0.0	1.0,0.466	-0.733
44177	ENSG00000154556.20	SORBS2	chr4	-	185684753	185684846	185678795	185678822	185690561	185690571	44177	63,90	30,38	20,28	22,62	193	100	1.8125809812e-06	0.000178130757695	0.521,0.551	0.32,0.19	0.281
74893	ENSG00000197568.15	HHLA3	chr1	+	70366145	70366328	70354854	70355107	70366443	70366537	74893	9,9	21,27	10,9	2,0	283	100	1.8430192078e-06	0.000180697890245	0.132,0.105	0.639,1.0	-0.701
57073	ENSG00000204149.15	AGAP6	chr10	+	50008499	50008588	50008024	50008076	50008710	50009348	57073	30,33	45,90	8,23	2,8	189	100	1.84802052738e-06	0.0001807641923	0.261,0.162	0.679,0.603	-0.429
76491	ENSG00000175832.13	ETV4	chr17	-	43545557	43545668	43545273	43545367	43546184	43546340	76491	98,115	10,16	173,36	2,1	211	100	1.85233102823e-06	0.0001807641923	0.823,0.773	0.976,0.945	-0.162
23548	ENSG00000029153.15	ARNTL2	chr12	+	27376345	27376387	27370128	27370230	27380246	27380404	23548	0,0	2,1	4,6	4,2	142	100	1.86967105065e-06	0.000182032043106	0.0,0.0	0.413,0.679	-0.546
66583	ENSG00000135111.16	TBX3	chr12	-	114679912	114679972	114679504	114679651	114680878	114681146	66583	192,172	90,77	164,268	18,59	160	100	1.8740974439e-06	0.000182039650786	0.571,0.583	0.851,0.74	-0.219
39222	ENSG00000112685.14	EXOC2	chr6	-	689138	689212	637700	637861	693018	693108	39222	14,6	39,16	0,2	44,22	174	100	1.89227153991e-06	0.000183379509302	0.171,0.177	0.0,0.05	0.149
252	ENSG00000241769.7	EOLA1-DT	chrX	-	149538723	149538906	149538114	149538172	149540694	149540813	252	5,4	1,4	2,6	0,0	283	100	1.91930074522e-06	0.000184292490134	0.639,0.261	1.0,1.0	-0.55
29557	ENSG00000165240.22	ATP7A	chrX	+	77922998	77923042	77910708	77910835	77971620	77971761	29557	7,3	1,0	0,3	4,5	144	100	1.9189139101e-06	0.000184292490134	0.829,1.0	0.0,0.294	0.767
54253	ENSG00000148090.12	AUH	chr9	-	91360278	91360440	91356087	91356155	91361627	91361887	54253	31,51	211,311	24,21	225,604	262	100	1.9107077267e-06	0.000184292490134	0.053,0.059	0.039,0.013	0.03
57048	ENSG00000107643.17	MAPK8	chr10	+	48325896	48325965	48308094	48308288	48401611	48401782	57048	21,10	10,5	2,2	7,15	169	100	1.91500709201e-06	0.000184292490134	0.554,0.542	0.145,0.073	0.439
76198	ENSG00000275066.5	SYNRG	chr17	-	37579131	37579434	37577379	37577613	37584647	37584759	76198	121,111	21,19	11,28	12,18	403	100	1.94136611997e-06	0.000185984651287	0.588,0.592	0.185,0.278	0.358
49425	ENSG00000165923.17	AGBL2	chr11	-	47699445	47699553	47692102	47692256	47704542	47704728	49425	6,6	4,2	6,8	0,0	208	100	1.97435046767e-06	0.000188712745043	0.419,0.591	1.0,1.0	-0.495
7479	ENSG00000146700.9	SSC4D	chr7	-	76400285	76400591	76398719	76398797	76404306	76404505	7479	105,61	75,39	48,14	4,0	406	100	2.00319825594e-06	0.000190599761329	0.256,0.278	0.747,1.0	-0.606
45660	ENSG00000137145.21	DENND4C	chr9	+	19336685	19336832	19336269	19336414	19340991	19341114	45660	146,150	19,10	60,48	20,24	247	100	2.00161802966e-06	0.000190599761329	0.757,0.859	0.548,0.447	0.31
45963	ENSG00000203667.10	COX20	chr1	+	244841943	244842058	244835657	244835756	244842194	244842258	45963	244,263	123,161	326,196	64,59	215	100	2.02341908739e-06	0.000192012239341	0.48,0.432	0.703,0.607	-0.199
49673	ENSG00000204580.14	DDR1	chr6	+	30884537	30884710	30882927	30882983	30888687	30888814	49673	13,31	6,5	23,8	0,0	273	100	2.02855478371e-06	0.000192012239341	0.442,0.694	1.0,1.0	-0.432
74954	ENSG00000115661.14	STK16	chr2	+	219247112	219247246	219245894	219246876	219247414	219247534	74954	239,183	30,21	279,209	13,2	234	100	2.0318027476e-06	0.000192012239341	0.773,0.788	0.902,0.978	-0.159
35705	ENSG00000116044.17	NFE2L2	chr2	-	177287610	177287834	177234004	177234271	177310963	177311032	35705	17,17	5,3	4,19	0,0	324	100	2.03985561731e-06	0.000192339088781	0.512,0.636	1.0,1.0	-0.426
18805	ENSG00000125944.21	HNRNPR	chr1	-	23340851	23341017	23338269	23338608	23344210	23344284	18805	439,405	107,89	347,314	39,28	266	100	2.08853686057e-06	0.000196486731838	0.607,0.631	0.77,0.808	-0.17
2756	ENSG00000005889.16	ZFX	chrX	+	24173606	24173723	24172714	24172800	24179182	24179770	2756	3,8	4,6	0,0	14,2	217	100	2.13785606573e-06	0.000200675659623	0.257,0.381	0.0,0.0	0.319
10691	ENSG00000204623.11	ZNRD1ASP	chr6	-	30034907	30035110	30021666	30021761	30058114	30058190	10691	42,31	5,5	54,30	0,0	303	100	2.15605854759e-06	0.000201669037557	0.735,0.672	1.0,1.0	-0.296
42675	ENSG00000048991.17	R3HDM1	chr2	+	135641535	135641790	135638895	135639122	135645378	135645527	42675	89,149	119,144	15,47	58,113	355	100	2.15807306403e-06	0.000201669037557	0.174,0.226	0.068,0.105	0.114
50175	ENSG00000168003.19	SLC3A2	chr11	+	62876786	62876879	62871576	62871669	62881018	62881447	50175	53,53	124,77	91,67	62,50	193	100	2.16392308494e-06	0.000201765345102	0.181,0.263	0.432,0.41	-0.199
7225	ENSG00000114374.13	USP9Y	chrY	+	12690325	12690441	12686512	12686606	12702009	12702055	7225	5,8	16,12	29,18	4,6	216	100	2.17113650525e-06	0.000201988066205	0.126,0.236	0.77,0.581	-0.494
16832	ENSG00000152795.18	HNRNPDL	chr4	-	82425562	82425667	82424628	82424883	82426036	82426129	16832	227,231	467,479	115,147	375,663	205	100	2.21924126786e-06	0.000205549857697	0.192,0.19	0.13,0.098	0.077
62945	ENSG00000075292.19	ZNF638	chr2	+	71422813	71424038	71418601	71418639	71424649	71424715	62945	1856,1806	30,29	1666,2068	13,4	1325	100	2.21646864684e-06	0.000205549857697	0.824,0.825	0.906,0.975	-0.116
41698	ENSG00000138101.20	DTNB	chr2	-	25383835	25383889	25379289	25379323	25387288	25387378	41698	45,26	11,8	64,48	2,1	154	100	2.24012735106e-06	0.000207026338967	0.727,0.678	0.954,0.969	-0.259
41924	ENSG00000275052.5	PPP4R3B	chr2	-	55573618	55573777	55568193	55568363	55577314	55577356	41924	387,447	11,23	324,351	31,48	259	100	2.2486922161e-06	0.000207360131337	0.931,0.882	0.801,0.738	0.137
68309	ENSG00000265681.8	RPL17	chr18	-	49491745	49491833	49491531	49491584	49492457	49492482	68309	27,29	1200,1045	39,15	359,377	188	100	2.26010187665e-06	0.000207954208936	0.012,0.015	0.055,0.021	-0.025
10692	ENSG00000204623.11	ZNRD1ASP	chr6	-	30035915	30035983	30021666	30021761	30058114	30058190	10692	18,14	5,5	22,12	0,0	168	100	2.27423533861e-06	0.000208623529002	0.682,0.625	1.0,1.0	-0.347
29458	ENSG00000157349.17	DDX19B	chr16	+	70314901	70314955	70299177	70299354	70315968	70316104	29458	34,31	9,8	19,14	0,0	154	100	2.28232595922e-06	0.000208623529002	0.71,0.716	1.0,1.0	-0.287
67791	ENSG00000250299.6	MRPS31P4	chr13	+	52629218	52629359	52627437	52627578	52632421	52632494	67791	26,12	42,38	22,42	13,17	241	100	2.28062549723e-06	0.000208623529002	0.204,0.116	0.413,0.506	-0.299
8277	ENSG00000104325.7	DECR1	chr8	+	90005447	90005845	90001476	90001561	90017123	90017326	8277	10,1	101,88	20,2	38,16	498	100	2.29739687474e-06	0.000209088087307	0.019,0.002	0.096,0.024	-0.05
36530	ENSG00000171617.15	ENC1	chr5	-	74637493	74640125	74634683	74636498	74640306	74640582	36530	1819,1727	73,58	1050,1268	15,17	2732	100	2.29606791868e-06	0.000209088087307	0.477,0.522	0.719,0.732	-0.226
12199	ENSG00000146856.14	AGBL3	chr7	+	134993492	134993678	134987874	134987996	135017051	135017159	12199	11,19	6,5	4,3	0,0	286	100	2.33979215147e-06	0.000212484595274	0.391,0.571	1.0,1.0	-0.519
51310	ENSG00000183808.12	RBM12B	chr8	-	93740628	93740696	93737306	93737355	93740880	93741009	51310	15,19	8,16	2,8	0,0	168	100	2.40092419179e-06	0.00021756426686	0.527,0.414	1.0,1.0	-0.529
29755	ENSG00000116497.18	S100PBP	chr1	+	32834033	32834061	32829963	32830067	32853078	32853166	29755	18,5	89,85	1,0	47,98	128	100	2.41257203792e-06	0.000218147577468	0.136,0.044	0.016,0.0	0.082
4999	ENSG00000178386.13	ZNF223	chr19	+	44063264	44063566	44060748	44060841	44066063	44066219	4999	0,0	4,11	8,4	0,2	402	100	2.43131038047e-06	0.000219368123014	0.0,0.0	1.0,0.332	-0.666
68417	ENSG00000169062.15	UPF3A	chr13	+	114298839	114299000	114291604	114291792	114301730	114301756	68417	1407,1400	41,31	1102,1022	2,14	261	100	2.43777317632e-06	0.000219478223713	0.929,0.945	0.995,0.965	-0.043
76244	ENSG00000167258.15	CDK12	chr17	+	39556863	39557058	39556285	39556413	39564759	39564907	76244	5,16	1,6	0,0	3,1	295	100	2.53077623558e-06	0.00022736254743	0.629,0.475	0.0,0.0	0.552
13821	ENSG00000112851.16	ERBIN	chr5	+	66072168	66072291	66068876	66069020	66075023	66075230	13821	34,40	5,3	2,4	4,6	223	100	2.61152746417e-06	0.000234114769352	0.753,0.857	0.183,0.23	0.598
63062	ENSG00000186174.13	BCL9L	chr11	-	118918825	118918879	118908269	118908655	118925237	118925926	63062	19,18	19,4	12,6	0,0	154	100	2.63119523669e-06	0.000235373907231	0.394,0.745	1.0,1.0	-0.43
7125	ENSG00000239521.11	CASTOR3	chr7	-	100211393	100211994	100200652	100202603	100213046	100213133	7125	93,61	6,5	62,55	0,0	701	100	2.67668907228e-06	0.000238933023478	0.689,0.635	1.0,1.0	-0.338
11963	ENSG00000167862.10	MRPL58	chr17	+	75018585	75018694	75017077	75017114	75019699	75019759	11963	6,18	16,11	0,0	14,2	209	100	2.6996366933e-06	0.000240468702479	0.152,0.439	0.0,0.0	0.295
7368	ENSG00000142765.18	SYTL1	chr1	+	27349971	27350132	27349475	27349765	27350388	27350485	7368	4,2	3,2	1,1	0,0	261	100	2.72024551229e-06	0.000241789975312	0.338,0.277	1.0,1.0	-0.693
45519	ENSG00000144468.17	RHBDD1	chr2	+	226838072	226838154	226836033	226836087	226864603	226865065	45519	0,0	2,2	4,6	4,0	182	100	2.73560459885e-06	0.000242640013837	0.0,0.0	0.355,1.0	-0.677
68404	ENSG00000169062.15	UPF3A	chr13	+	114282836	114282943	114281924	114282127	114286518	114286629	68404	192,196	8,4	99,151	43,17	207	100	2.74976914105e-06	0.000243380729577	0.921,0.959	0.527,0.811	0.271
26813	ENSG00000134248.14	LAMTOR5	chr1	-	110407032	110407128	110406317	110406379	110407585	110407668	26813	16,23	242,196	37,34	156,115	196	100	2.75942967276e-06	0.000243720513186	0.033,0.056	0.108,0.131	-0.075
56672	ENSG00000165322.18	ARHGAP12	chr10	-	31839636	31839711	31831738	31831800	31843460	31843586	56672	47,38	18,20	66,101	10,3	175	100	2.76691909984e-06	0.000243867511821	0.599,0.521	0.79,0.951	-0.31
2879	ENSG00000101150.18	TPD52L2	chr20	+	63875815	63875875	63873667	63873816	63882718	63882820	2879	278,163	117,109	331,78	58,20	160	100	2.80439047196e-06	0.00024665085527	0.598,0.483	0.781,0.709	-0.205
627	ENSG00000225470.9	JPX	chrX	+	73998767	73998844	73994557	73994961	74004269	74004529	627	2,10	6,2	14,2	0,0	177	100	2.82959128595e-06	0.000248345574814	0.158,0.739	1.0,1.0	-0.551
18855	ENSG00000133657.17	ATP13A3	chr3	-	194412198	194412288	194402676	194406116	194413758	194413839	18855	148,86	86,43	51,45	110,50	190	100	2.90589736396e-06	0.000254509190674	0.475,0.513	0.196,0.321	0.235
8288	ENSG00000273611.5	ZNHIT3	chr17	+	36486934	36486966	36486680	36486785	36492812	36492899	8288	135,89	60,42	148,131	19,27	132	100	2.9245524511e-06	0.000255315239292	0.63,0.616	0.855,0.786	-0.198
60782	ENSG00000139631.20	CSAD	chr12	-	53171325	53171441	53170422	53170502	53171881	53171988	60782	5,12	8,1	0,0	15,1	216	100	2.92729761997e-06	0.000255315239292	0.224,0.847	0.0,0.0	0.535
19032	ENSG00000116001.17	TIA1	chr2	-	70228343	70228462	70227734	70227822	70229058	70229091	19032	9,5	67,71	15,11	18,24	219	100	2.955167136e-06	0.000257210129207	0.058,0.031	0.276,0.173	-0.18
20138	ENSG00000024526.17	DEPDC1	chr1	-	68494429	68494695	68489451	68489608	68496951	68497082	20138	147,123	3,11	143,153	0,0	366	100	2.96863283955e-06	0.00025784608678	0.93,0.753	1.0,1.0	-0.158
10097	ENSG00000141485.17	SLC13A5	chr17	-	6707027	6707045	6706641	6706778	6713231	6713369	10097	3,3	2,4	2,1	0,0	118	100	2.9805915539e-06	0.000258348789656	0.56,0.389	1.0,1.0	-0.525
30338	ENSG00000160867.15	FGFR4	chr5	+	177090744	177090825	177089549	177089693	177090937	177091104	30338	335,330	17,10	147,203	0,0	181	100	3.03556207715e-06	0.000262569847851	0.916,0.948	1.0,1.0	-0.068
16544	ENSG00000239883.9	PARGP1	chr10	-	45939360	45939447	45916078	45916171	45946836	45946911	16544	80,70	4,6	58,129	16,40	187	100	3.04594164247e-06	0.000262674187762	0.914,0.862	0.66,0.633	0.241
31717	ENSG00000164011.18	ZNF691	chr1	+	42849290	42849413	42846572	42846657	42850949	42852477	31717	29,14	8,10	13,3	0,0	223	100	3.04931697725e-06	0.000262674187762	0.619,0.386	1.0,1.0	-0.498
78970	ENSG00000197256.11	KANK2	chr19	-	11196049	11196227	11195555	11195820	11197484	11197530	78970	10,8	33,45	22,31	20,32	278	100	3.06954498641e-06	0.00026387371839	0.098,0.06	0.284,0.258	-0.192
74046	ENSG00000117859.19	OSBPL9	chr1	+	51756319	51756358	51750144	51750195	51760689	51760764	74046	327,289	4,5	162,187	7,21	139	100	3.08437979113e-06	0.000264605655647	0.983,0.977	0.943,0.865	0.076
66052	ENSG00000238105.7	GOLGA2P5	chr12	-	100168451	100168633	100167549	100167639	100170564	100170667	66052	28,41	4,7	33,24	0,0	282	100	3.09285223665e-06	0.000264789895475	0.713,0.675	1.0,1.0	-0.306
23098	ENSG00000206559.8	ZCWPW2	chr3	+	28515553	28515621	28514063	28514122	28520991	28521116	23098	3,4	0,0	6,0	3,2	168	100	3.11911480055e-06	0.000266493349235	1.0,1.0	0.543,0.0	0.728
35101	ENSG00000116151.14	MORN1	chr1	-	2389924	2389996	2388003	2388337	2391457	2391554	35101	22,30	7,9	4,20	0,0	172	100	3.17447734599e-06	0.000270671067393	0.646,0.66	1.0,1.0	-0.347
67334	ENSG00000244754.9	N4BP2L2	chr13	-	32477886	32478048	32446358	32446480	32480589	32480637	67334	5,16	7,2	4,8	0,0	262	100	3.18265644728e-06	0.000270816894645	0.214,0.753	1.0,1.0	-0.516
26023	ENSG00000113810.16	SMC4	chr3	+	160412529	160412849	160412325	160412453	160413472	160413583	26023	68,76	180,175	47,37	226,256	420	100	3.22028126598e-06	0.000273462627181	0.083,0.094	0.047,0.033	0.048
19907	ENSG00000273066.5	ENSG00000273066	chr9	+	136809254	136809429	136807739	136808326	136809687	136810042	19907	306,218	12,7	670,684	3,4	275	100	3.23913292821e-06	0.000274506680242	0.903,0.919	0.988,0.984	-0.075
45929	ENSG00000091073.20	DTX2	chr7	+	76476942	76477178	76470299	76470419	76480420	76480447	45929	8,2	2,0	0,0	3,2	336	100	3.28633849556e-06	0.000277944567912	0.543,1.0	0.0,0.0	0.772
64502	ENSG00000134283.18	PPHLN1	chr12	+	42384939	42384996	42374862	42375074	42387455	42387535	64502	78,55	24,22	45,81	0,8	157	100	3.33077725823e-06	0.000281135060314	0.674,0.614	1.0,0.866	-0.289
46358	ENSG00000117697.15	NSL1	chr1	-	212766188	212766273	212738561	212738686	212782371	212782426	46358	7,9	1,0	3,3	3,6	185	100	3.39683627171e-06	0.000286133904457	0.791,1.0	0.351,0.213	0.613
21683	ENSG00000055917.16	PUM2	chr2	-	20278582	20278819	20263192	20263460	20282946	20283231	21683	988,1227	19,13	452,593	26,22	337	100	3.42653168717e-06	0.000288055721051	0.939,0.966	0.838,0.889	0.089
53952	ENSG00000134324.12	LPIN1	chr2	+	11763022	11763286	11746633	11746671	11765532	11765733	53952	0,0	15,34	6,5	2,10	364	100	3.45025831028e-06	0.000289469066453	0.0,0.0	0.452,0.121	-0.286
74778	ENSG00000186153.18	WWOX	chr16	+	78117213	78117414	78114975	78115154	78118954	78120464	74778	9,16	1,7	4,2	0,0	301	100	3.47021718849e-06	0.000290561285192	0.749,0.432	1.0,1.0	-0.409
5199	ENSG00000196235.14	SUPT5H	chr19	+	39458293	39458305	39457674	39457740	39458817	39458887	5199	188,223	50,26	212,75	9,4	112	100	3.54067847896e-06	0.000295869270502	0.77,0.884	0.955,0.944	-0.123
47271	ENSG00000070669.17	ASNS	chr7	-	97871718	97871996	97869777	97869813	97872350	97872408	47271	68,86	6,13	28,4	16,10	378	100	3.55522938444e-06	0.000296493382828	0.75,0.636	0.316,0.096	0.487
71830	ENSG00000175061.20	SNHG29	chr17	+	16439531	16439703	16439326	16439414	16440184	16440253	71830	988,684	887,741	931,731	586,316	272	100	3.57011142671e-06	0.000297142574313	0.291,0.253	0.369,0.46	-0.142
41168	ENSG00000174938.15	SEZ6L2	chr16	-	29895258	29895460	29888539	29888725	29896821	29897121	41168	355,194	13,18	123,28	0,0	302	100	3.62074975802e-06	0.000300759302816	0.9,0.781	1.0,1.0	-0.159
17940	ENSG00000183137.15	CEP57L1	chr6	+	109106034	109106090	109100191	109100286	109145218	109145381	17940	1,1	2,2	4,4	0,0	156	100	3.65700126759e-06	0.000302569877604	0.243,0.243	1.0,1.0	-0.757
56516	ENSG00000167508.12	MVD	chr16	-	88657145	88657247	88656104	88656304	88657435	88657582	56516	2,2	51,17	12,2	15,3	202	100	3.65085075926e-06	0.000302569877604	0.019,0.055	0.284,0.248	-0.229
25037	ENSG00000204463.14	BAG6	chr6	-	31644306	31644414	31644081	31644194	31644524	31644602	25037	413,303	95,79	261,78	26,5	208	100	3.68948620766e-06	0.000304655503124	0.676,0.648	0.828,0.882	-0.193
18415	ENSG00000087266.17	SH3BP2	chr4	+	2823394	2823569	2822934	2823037	2824612	2824730	18415	2,0	36,46	8,2	11,1	275	100	3.75870490477e-06	0.000307441755854	0.02,0.0	0.209,0.421	-0.305
18529	ENSG00000104852.15	SNRNP70	chr19	+	49102113	49102185	49101389	49101471	49104633	49104735	18529	96,138	808,896	47,37	494,829	172	100	3.73940910969e-06	0.000307441755854	0.065,0.082	0.052,0.025	0.035
29558	ENSG00000165240.22	ATP7A	chrX	+	77922998	77923052	77910739	77910835	77971620	77971761	29558	5,4	1,0	0,3	4,5	154	100	3.75994694846e-06	0.000307441755854	0.765,1.0	0.0,0.28	0.743
45981	ENSG00000169371.14	SNUPN	chr15	-	75622341	75622408	75621045	75621056	75625335	75625663	45981	8,15	5,5	7,4	0,0	167	100	3.75601643576e-06	0.000307441755854	0.489,0.642	1.0,1.0	-0.434
56449	ENSG00000237298.11	TTN-AS1	chr2	+	178599593	178599750	178597595	178597681	178600557	178600572	56449	6,26	11,20	11,26	2,0	257	100	3.74236996759e-06	0.000307441755854	0.175,0.336	0.682,1.0	-0.585
57742	ENSG00000182272.12	B4GALNT4	chr11	+	372851	372947	372661	372754	373025	373116	57742	144,156	9,13	99,42	0,0	196	100	3.78176912674e-06	0.000308623322594	0.891,0.86	1.0,1.0	-0.125
54294	ENSG00000198363.18	ASPH	chr8	-	61682438	61682483	61680967	61681036	61684038	61684188	54294	29,34	534,412	12,13	700,468	145	100	3.80285960833e-06	0.000309740695531	0.036,0.054	0.012,0.019	0.029
61877	ENSG00000166435.16	XRRA1	chr11	-	74851087	74851203	74848114	74848462	74862980	74863021	61877	19,6	7,1	17,2	0,0	216	100	3.85545530068e-06	0.000313414827501	0.557,0.735	1.0,1.0	-0.354
13339	ENSG00000219545.12	UMAD1	chr7	+	7676101	7676208	7673308	7673453	7801669	7801743	13339	11,16	78,46	4,0	39,96	207	100	3.86846664424e-06	0.00031384483604	0.064,0.144	0.047,0.0	0.08
55570	ENSG00000155970.12	MICU3	chr8	+	17069687	17069719	17064083	17064237	17077782	17077861	55570	2,1	6,9	2,9	0,2	132	100	3.8757382117e-06	0.00031384483604	0.202,0.078	1.0,0.773	-0.747
62578	ENSG00000137693.14	YAP1	chr11	+	102186017	102186131	102162455	102162571	102205892	102206074	62578	369,375	54,38	256,353	10,16	214	100	3.90944048612e-06	0.000315962791412	0.762,0.822	0.923,0.912	-0.125
39931	ENSG00000143303.12	METTL25B	chr1	+	156734008	156734052	156733376	156733520	156735724	156735800	39931	2,4	7,1	6,2	0,0	144	100	3.91773748298e-06	0.000316023275	0.166,0.735	1.0,1.0	-0.549
54955	ENSG00000119397.19	CNTRL	chr9	+	121080307	121080478	121075004	121075067	121088295	121088543	54955	9,6	1,7	15,3	0,0	271	100	3.92777416691e-06	0.000316223587496	0.769,0.24	1.0,1.0	-0.496
60805	ENSG00000198561.16	CTNND1	chr11	+	57791384	57791673	57761796	57762119	57795576	57795729	60805	285,124	6,5	56,16	9,9	389	100	3.98454891226e-06	0.000319957459394	0.924,0.864	0.615,0.314	0.429
61205	ENSG00000154144.13	TBRG1	chr11	+	124626472	124626609	124625670	124625903	124626903	124627050	61205	23,33	39,47	58,57	29,27	237	100	3.9894373296e-06	0.000319957459394	0.199,0.229	0.458,0.471	-0.251
5406	ENSG00000161265.15	U2AF1L4	chr19	-	35744625	35744692	35744322	35744421	35745124	35745157	5406	6,8	7,10	15,10	1,1	167	100	4.03124469617e-06	0.000320851823584	0.339,0.324	0.9,0.857	-0.547
5691	ENSG00000112031.16	MTRF1L	chr6	-	152991184	152991416	152987361	152990095	152992856	152992974	5691	255,405	83,116	246,773	38,33	332	100	4.02353931672e-06	0.000320851823584	0.481,0.513	0.661,0.876	-0.271
65204	ENSG00000092841.19	MYL6	chr12	+	56159622	56159730	56158683	56158711	56159974	56160148	65204	899,479	77,88	711,250	19,19	208	100	4.03074917654e-06	0.000320851823584	0.849,0.724	0.947,0.863	-0.119
73715	ENSG00000169592.15	INO80E	chr16	+	30001413	30001530	30000928	30001040	30005220	30005791	73715	149,68	24,21	25,3	0,0	217	100	4.02976777814e-06	0.000320851823584	0.741,0.599	1.0,1.0	-0.33
68708	ENSG00000169189.17	NSMCE1	chr16	-	27241352	27241889	27235177	27235299	27257434	27257581	68708	28,38	160,147	11,6	140,141	637	100	4.05569199169e-06	0.000322185095317	0.027,0.039	0.012,0.007	0.024
10199	ENSG00000096088.16	PGC	chr6	-	41744396	41744514	41742289	41742489	41744657	41744808	10199	2363,2342	141,127	703,431	17,8	218	100	4.08796020801e-06	0.000324133435811	0.885,0.894	0.95,0.961	-0.066
45877	ENSG00000100445.18	SDR39U1	chr14	-	24442097	24442260	24440782	24440926	24442345	24442694	45877	189,169	3,4	39,35	11,4	263	100	4.12452489995e-06	0.000326414432772	0.96,0.941	0.574,0.769	0.279
19749	ENSG00000280987.4	MATR3	chr5	+	139293452	139293575	139279050	139279129	139307238	139308327	19749	17,12	8,6	6,4	0,0	223	100	4.14151020178e-06	0.00032714023509	0.488,0.473	1.0,1.0	-0.52
46193	ENSG00000168385.18	SEPTIN2	chr2	+	241317498	241317599	241315943	241315982	241324215	241324241	46193	39,39	914,628	44,28	304,249	201	100	4.17914094719e-06	0.000329491027786	0.021,0.03	0.067,0.053	-0.034
76582	ENSG00000262879.7	ENSG00000262879	chr17	-	47035043	47035126	47033277	47033381	47056459	47056753	76582	2,0	13,22	2,9	2,1	183	100	4.21751554858e-06	0.000331891519627	0.078,0.0	0.353,0.831	-0.553
37975	ENSG00000067141.17	NEO1	chr15	+	73293389	73293548	73289073	73289238	73298347	73298611	37975	1024,1048	0,8	128,140	10,2	259	100	4.24689025369e-06	0.000332951424102	1.0,0.981	0.832,0.964	0.093
40695	ENSG00000115042.10	FAHD2A	chr2	+	95405276	95405402	95402790	95402992	95405552	95405803	40695	21,20	7,6	27,19	1,0	226	100	4.24495636986e-06	0.000332951424102	0.57,0.596	0.923,1.0	-0.379
12237	ENSG00000145868.17	FBXO38	chr5	+	148427212	148427722	148425521	148425701	148433423	148433524	12237	189,151	4,5	126,86	17,12	610	100	4.36207892074e-06	0.000341342867321	0.886,0.832	0.549,0.54	0.315
36597	ENSG00000188186.11	LAMTOR4	chr7	+	100152715	100152757	100149498	100149565	100153399	100153517	36597	5,2	3,1	0,0	6,1	142	100	4.37476281956e-06	0.000341696726569	0.54,0.585	0.0,0.0	0.563
2425	ENSG00000160226.16	CFAP410	chr21	-	44334060	44335804	44333032	44333262	44337648	44337667	2425	75,73	2,4	61,12	0,0	1844	100	4.50298108512e-06	0.000350954983236	0.67,0.497	1.0,1.0	-0.416
9252	ENSG00000025156.13	HSF2	chr6	+	122427902	122427956	122423580	122423686	122431429	122431514	9252	14,20	15,18	1,8	15,39	154	100	4.51006284441e-06	0.000350954983236	0.377,0.419	0.041,0.118	0.319
29559	ENSG00000165240.22	ATP7A	chrX	+	77922998	77923100	77910738	77910835	77971620	77971761	29559	5,4	1,0	0,3	4,5	202	100	4.53354057994e-06	0.000351475326628	0.712,1.0	0.0,0.229	0.741
49617	ENSG00000143847.16	PPFIA4	chr1	+	203056783	203056950	203056374	203056508	203059177	203059271	49617	6,5	4,1	7,3	0,0	267	100	4.53079448537e-06	0.000351475326628	0.36,0.652	1.0,1.0	-0.494
29573	ENSG00000164081.13	TEX264	chr3	+	51672209	51672301	51671174	51671288	51674270	51674562	29573	20,13	18,10	2,0	18,1	192	100	4.59376555928e-06	0.000355354726532	0.367,0.404	0.055,0.0	0.358
60665	ENSG00000109919.10	MTCH2	chr11	-	47625673	47625741	47622700	47622776	47627079	47627127	60665	402,283	16,22	543,411	11,2	168	100	4.60055563789e-06	0.000355354726532	0.937,0.884	0.967,0.992	-0.069
9223	ENSG00000137522.18	RNF121	chr11	+	71978085	71978235	71960749	71960891	71982806	71982915	9223	9,10	0,4	1,0	2,5	250	100	4.61138413099e-06	0.000355535168773	1.0,0.5	0.167,0.0	0.666
75929	ENSG00000185842.16	DNAH14	chr1	+	225043885	225043983	225043743	225043789	225051450	225051795	75929	3,0	3,1	2,1	0,0	198	100	4.62550238689e-06	0.00035596812027	0.336,0.0	1.0,1.0	-0.832
45417	ENSG00000124357.13	NAGK	chr2	+	71070740	71070839	71068587	71068712	71072640	71072751	45417	7,8	3,4	4,8	0,0	199	100	4.63669626305e-06	0.000356174842298	0.54,0.501	1.0,1.0	-0.48
75084	ENSG00000197912.16	SPG7	chr16	+	89545871	89546181	89542983	89544772	89546657	89546760	75084	10,5	105,93	18,15	70,25	410	100	4.65049219933e-06	0.000356580322207	0.023,0.013	0.059,0.128	-0.075
26263	ENSG00000072756.18	TRNT1	chr3	+	3149093	3149233	3147905	3148187	3150539	3150879	26263	12,8	0,0	9,8	4,2	240	100	4.68721067015e-06	0.000358738710614	1.0,1.0	0.484,0.625	0.446
6310	ENSG00000119979.18	DENND10	chr10	+	119105310	119105495	119104091	119104197	119107947	119108096	6310	8,18	7,6	2,0	12,5	285	100	4.74006010831e-06	0.000361754890421	0.286,0.513	0.055,0.0	0.372
13668	ENSG00000113048.19	MRPS27	chr5	-	72283504	72283658	72241646	72241688	72295530	72295589	13668	5,12	2,5	8,4	0,0	254	100	4.74390146521e-06	0.000361754890421	0.496,0.486	1.0,1.0	-0.509
59323	ENSG00000132600.18	PRMT7	chr16	+	68321425	68321462	68315194	68316074	68324682	68324832	59323	148,160	10,9	101,184	25,35	137	100	4.77126858067e-06	0.000363180289327	0.915,0.928	0.747,0.793	0.151
73725	ENSG00000128607.14	KLHDC10	chr7	+	130096920	130097007	130070533	130070809	130116444	130116666	73725	16,7	7,3	8,5	0,0	187	100	4.7923129658e-06	0.000364120113091	0.55,0.555	1.0,1.0	-0.448
54954	ENSG00000119397.19	CNTRL	chr9	+	121080305	121080478	121074659	121075067	121088295	121088543	54954	10,10	1,7	18,3	0,0	273	100	4.93427510107e-06	0.000374227223019	0.786,0.344	1.0,1.0	-0.435
74826	ENSG00000173818.17	ENDOV	chr17	+	80422205	80422245	80415486	80415610	80423519	80423587	74826	0,1	1,2	5,1	0,0	140	100	4.98032983598e-06	0.000377037086046	0.0,0.263	1.0,1.0	-0.869
35043	ENSG00000187109.15	NAP1L1	chr12	-	76074202	76074239	76067370	76067473	76084566	76084612	35043	35,27	0,2	11,5	4,7	137	100	5.04997293338e-06	0.000381103046478	1.0,0.908	0.667,0.343	0.449
73302	ENSG00000166669.14	ATF7IP2	chr16	+	10387377	10387494	10386054	10386122	10419580	10419623	73302	6,5	3,3	3,6	0,0	217	100	5.05224389813e-06	0.000381103046478	0.48,0.434	1.0,1.0	-0.543
64340	ENSG00000064115.11	TM7SF3	chr12	-	26979783	26979936	26975495	26975658	26980565	26980646	64340	166,100	10,4	175,92	0,0	253	100	5.0813661463e-06	0.00038261042035	0.868,0.908	1.0,1.0	-0.112
47884	ENSG00000188994.14	ZNF292	chr6	+	87214997	87215142	87155568	87155759	87215902	87216057	47884	0,0	9,9	4,10	9,4	245	100	5.16744904266e-06	0.00038769758812	0.0,0.0	0.154,0.505	-0.33
74853	ENSG00000166783.22	MARF1	chr16	-	15600640	15600701	15600427	15600553	15601990	15602203	74853	73,76	8,8	54,46	0,0	161	100	5.16234001724e-06	0.00038769758812	0.85,0.855	1.0,1.0	-0.147
12809	ENSG00000171130.19	ATP6V0E2	chr7	+	149878677	149878746	149875597	149875645	149879334	149880689	12809	217,217	28,46	116,59	2,4	169	100	5.23486754944e-06	0.000392053184181	0.821,0.736	0.972,0.897	-0.156
70042	ENSG00000066427.25	ATXN3	chr14	-	92047895	92047997	92044797	92044958	92049602	92049762	70042	0,0	1,2	6,2	0,2	202	100	5.34811084163e-06	0.000399819036401	0.0,0.0	1.0,0.331	-0.665
57659	ENSG00000138326.21	RPS24	chr10	+	78037438	78037441	78037193	78037304	78040203	78040225	57659	67,45	1169,774	99,65	663,697	103	100	5.36567928322e-06	0.000400417403194	0.053,0.053	0.127,0.083	-0.052
77231	ENSG00000109062.12	SLC9A3R1	chr17	+	74766935	74766976	74763029	74763520	74768146	74768236	77231	1826,1864	43,39	873,679	2,6	141	100	5.58789546334e-06	0.000416258440521	0.968,0.971	0.997,0.988	-0.023
50684	ENSG00000223812.8	PYDC2-AS1	chr3	+	191557261	191557384	191425492	191425604	191569599	191569824	50684	5,15	8,2	2,2	0,0	223	100	5.62318573716e-06	0.000418143287542	0.219,0.771	1.0,1.0	-0.505
52584	ENSG00000104529.19	EEF1D	chr8	-	143590607	143590738	143588990	143590081	143592646	143592797	52584	13,13	26,13	0,0	11,2	231	100	5.72824022249e-06	0.000424447392769	0.178,0.302	0.0,0.0	0.24
64831	ENSG00000050426.16	LETMD1	chr12	+	51053777	51053860	51049033	51049185	51056349	51056428	64831	24,20	50,58	1,2	15,38	183	100	5.71893036705e-06	0.000424447392769	0.208,0.159	0.035,0.028	0.152
20654	ENSG00000105058.12	FAM32A	chr19	+	16190519	16190573	16185379	16185765	16190886	16191378	20654	331,252	11,9	308,381	0,0	154	100	5.77844768901e-06	0.000427411152828	0.951,0.948	1.0,1.0	-0.05
6887	ENSG00000172765.19	TMCC1	chr3	-	129857249	129857405	129848342	129848412	129860939	129861012	6887	32,22	0,1	16,36	3,11	256	100	5.81298072422e-06	0.000429207121727	1.0,0.896	0.676,0.561	0.329
37719	ENSG00000059377.18	TBXAS1	chr7	+	139782665	139782729	139778247	139778471	139787337	139787426	37719	5,5	1,6	1,7	0,0	164	100	5.85413273946e-06	0.000431484625242	0.753,0.337	1.0,1.0	-0.455
78863	ENSG00000267106.9	ZNF561-AS1	chr19	+	9627715	9627806	9621502	9621645	9632227	9632417	78863	0,0	3,7	1,5	0,2	191	100	6.01805810807e-06	0.000442787350957	0.0,0.0	1.0,0.567	-0.783
28919	ENSG00000173409.14	ARV1	chr1	+	230999622	230999801	230997120	230997267	231000137	231000595	28919	7,6	25,8	0,0	18,32	279	100	6.08635062682e-06	0.000447026436828	0.091,0.212	0.0,0.0	0.151
18889	ENSG00000109689.20	STIM2	chr4	+	27019399	27021068	27017710	27017984	27022518	27023947	18889	24,31	3,4	56,72	0,1	1769	100	6.14944794974e-06	0.000450081535692	0.311,0.305	1.0,0.803	-0.593
78862	ENSG00000267106.9	ZNF561-AS1	chr19	+	9627715	9627806	9621248	9621350	9632227	9632417	78862	0,0	2,2	1,5	0,2	191	100	6.14210606653e-06	0.000450081535692	0.0,0.0	1.0,0.567	-0.783
20183	ENSG00000185090.15	MANEAL	chr1	+	37796743	37796820	37795736	37795846	37799566	37800448	20183	56,65	15,9	13,20	0,0	177	100	6.26288060679e-06	0.000457583763706	0.678,0.803	1.0,1.0	-0.259
29496	ENSG00000251136.11	RIPK2-DT	chr8	-	89725505	89725641	89723962	89724966	89757044	89757383	29496	25,24	4,5	12,36	0,0	236	100	6.37474792187e-06	0.000464137081303	0.726,0.67	1.0,1.0	-0.302
32891	ENSG00000184661.14	CDCA2	chr8	+	25472112	25472184	25469895	25469980	25479912	25480124	32891	10,20	35,41	0,0	13,7	172	100	6.36611457228e-06	0.000464137081303	0.142,0.221	0.0,0.0	0.181
49823	ENSG00000152952.12	PLOD2	chr3	-	146077861	146077924	146076781	146076895	146079115	146079257	49823	687,565	307,237	189,438	418,366	163	100	6.50288765813e-06	0.000472644777444	0.579,0.594	0.217,0.423	0.267
37514	ENSG00000077152.12	UBE2T	chr1	-	202334988	202335049	202333449	202333555	202335645	202335818	37514	51,42	7,10	22,20	0,0	161	100	6.5675622295e-06	0.000476406210791	0.819,0.723	1.0,1.0	-0.229
56103	ENSG00000185344.15	ATP6V0A2	chr12	+	123751109	123751229	123748574	123748785	123752282	123752402	56103	76,81	6,7	76,62	0,0	220	100	6.57739853904e-06	0.000476406210791	0.852,0.84	1.0,1.0	-0.154
78239	ENSG00000141644.18	MBD1	chr18	-	50274976	50275045	50273563	50273863	50275128	50275155	78239	95,56	0,0	49,10	12,0	169	100	6.81040968986e-06	0.000492431436383	1.0,1.0	0.707,1.0	0.147
27552	ENSG00000197548.13	ATG7	chr3	+	11282192	11282438	11272402	11272430	11298685	11298855	27552	7,7	10,5	6,15	1,0	346	100	6.88410890082e-06	0.000496902101953	0.168,0.288	0.634,1.0	-0.589
21179	ENSG00000151689.13	INPP1	chr2	+	190348887	190349031	190343588	190343961	190360038	190360131	21179	14,7	5,3	3,8	0,0	244	100	6.9380123533e-06	0.000499930958986	0.534,0.489	1.0,1.0	-0.488
32688	ENSG00000105865.11	DUS4L	chr7	+	107573703	107573821	107571144	107571266	107575187	107575282	32688	23,27	2,1	8,5	7,4	218	100	6.96735729211e-06	0.000501182840265	0.841,0.925	0.344,0.364	0.529
71607	ENSG00000128989.11	ARPP19	chr15	-	52564189	52564246	52557099	52557222	52569115	52569167	71607	15,3	0,0	10,1	2,5	157	100	6.98340874628e-06	0.000501475827038	1.0,1.0	0.761,0.113	0.563
16641	ENSG00000130988.13	RGN	chrX	+	47089775	47089991	47084417	47084600	47091677	47091809	16641	258,275	79,91	181,310	186,174	316	100	7.01684606286e-06	0.000502755811848	0.508,0.489	0.235,0.361	0.201
42358	ENSG00000187860.11	CCDC157	chr22	+	30372074	30372286	30370325	30371727	30373596	30373764	42358	0,2	2,1	14,4	1,0	312	100	7.03726037843e-06	0.000502755811848	0.0,0.391	0.818,1.0	-0.714
78861	ENSG00000267106.9	ZNF561-AS1	chr19	+	9627712	9627806	9621502	9621645	9632227	9632417	78861	0,0	3,7	1,5	0,2	194	100	7.03204133434e-06	0.000502755811848	0.0,0.0	1.0,0.563	-0.781
73883	ENSG00000080200.10	CRYBG3	chr3	+	97898882	97899025	97895958	97896085	97899136	97899263	73883	67,54	7,6	31,51	0,0	243	100	7.06487186974e-06	0.000503868587439	0.798,0.787	1.0,1.0	-0.208
76360	ENSG00000073584.20	SMARCE1	chr17	-	40639980	40640078	40637491	40637572	40642454	40642559	76360	4,3	349,311	2,20	140,111	198	100	7.12504789768e-06	0.000507296139858	0.006,0.005	0.007,0.083	-0.04
69423	ENSG00000100625.9	SIX4	chr14	-	60720979	60721144	60719759	60720445	60723211	60724351	69423	0,0	9,14	6,9	11,1	265	100	7.15519151007e-06	0.000508577406739	0.0,0.0	0.171,0.773	-0.472
33011	ENSG00000224081.10	SLC44A3-AS1	chr1	-	94732257	94732437	94705438	94705557	94819955	94820266	33011	19,15	4,4	17,9	0,0	280	100	7.29619872764e-06	0.00051597189144	0.629,0.573	1.0,1.0	-0.399
67232	ENSG00000011304.22	PTBP1	chr19	+	805512	805569	805012	805187	806407	806556	67232	12,6	8,1	8,5	0,0	157	100	7.2863238858e-06	0.00051597189144	0.489,0.793	1.0,1.0	-0.359
69683	ENSG00000148660.22	CAMK2G	chr10	-	73819531	73819617	73817478	73817554	73821681	73821730	69683	11,17	22,25	1,0	11,10	186	100	7.28014566065e-06	0.00051597189144	0.212,0.268	0.047,0.0	0.216
54557	ENSG00000172775.17	PSME3IP1	chr16	-	57174168	57174286	57173727	57173869	57185820	57186055	54557	37,48	116,120	51,58	65,48	218	100	7.36562941195e-06	0.000520003499715	0.128,0.155	0.265,0.357	-0.169
43082	ENSG00000189057.11	FAM111B	chr11	+	59109539	59109706	59108667	59108712	59124178	59127412	43082	31,13	1,0	11,18	2,11	267	100	7.40881652039e-06	0.000521573892763	0.921,1.0	0.673,0.38	0.434
49982	ENSG00000129197.15	RPAIN	chr17	+	5428070	5428211	5425970	5426299	5432541	5432876	49982	94,78	16,2	94,24	0,0	241	100	7.4127903068e-06	0.000521573892763	0.709,0.942	1.0,1.0	-0.175
1944	ENSG00000100280.17	AP1B1	chr22	-	29329711	29329720	29327679	29328895	29330377	29330532	1944	25,32	86,96	63,21	39,26	109	100	7.4670905561e-06	0.000524512996864	0.211,0.234	0.597,0.426	-0.289
20969	ENSG00000244257.5	PKD1P1	chr16	+	16318513	16318734	16317895	16318079	16318922	16319038	20969	14,3	3,2	5,4	0,0	321	100	7.51662368259e-06	0.000527107957239	0.592,0.318	1.0,1.0	-0.545
78713	ENSG00000118965.16	WDR35	chr2	-	19960553	19960614	19953833	19953978	19966723	19966909	78713	48,55	0,2	18,14	12,2	161	100	7.54432436967e-06	0.000528165785512	1.0,0.945	0.482,0.813	0.325
40729	ENSG00000100196.11	KDELR3	chr22	+	38479592	38479751	38474522	38474623	38481211	38481464	40729	100,59	8,4	44,105	0,0	259	100	7.58982418836e-06	0.000529584703393	0.828,0.851	1.0,1.0	-0.161
79073	ENSG00000188878.20	FBF1	chr17	-	75939817	75939882	75938172	75938232	75940847	75941042	79073	16,6	14,1	4,4	0,0	165	100	7.58989184368e-06	0.000529584703393	0.409,0.784	1.0,1.0	-0.403
68564	ENSG00000259171.1	ENSG00000259171	chr14	+	20693546	20693650	20684586	20684758	20699354	20700576	68564	513,349	233,142	794,176	596,256	204	100	7.65480210629e-06	0.000533225108452	0.519,0.546	0.395,0.252	0.209
73631	ENSG00000159166.15	LAD1	chr1	-	201391077	201391195	201389159	201389303	201399268	201399309	73631	0,4	122,86	14,2	69,14	218	100	7.75803184661e-06	0.000539518277838	0.0,0.021	0.085,0.062	-0.063
15384	ENSG00000168255.20	POLR2J3	chr7	-	102543524	102543702	102541500	102541662	102544705	102544776	15384	4,3	1,1	0,0	5,2	278	100	7.93635826668e-06	0.000551004376177	0.59,0.519	0.0,0.0	0.554
2438	ENSG00000160218.13	TRAPPC10	chr21	+	44084121	44084263	44082787	44083302	44086801	44086960	2438	104,121	11,4	107,63	0,0	242	100	7.98697818793e-06	0.000553600731519	0.796,0.926	1.0,1.0	-0.139
29560	ENSG00000165240.22	ATP7A	chrX	+	77922998	77923188	77910738	77910835	77971620	77971761	29560	5,4	1,0	0,3	4,5	290	100	8.12447990506e-06	0.000562200580538	0.633,1.0	0.0,0.171	0.731
27876	ENSG00000162994.16	CLHC1	chr2	-	55228031	55228204	55222234	55222493	55232222	55232293	27876	9,10	3,3	11,18	0,0	273	100	8.15085404204e-06	0.000563094891865	0.524,0.55	1.0,1.0	-0.463
74844	ENSG00000231312.8	MAP4K3-DT	chr2	+	39584604	39584810	39557981	39558046	39588448	39588567	74844	15,18	0,0	26,19	2,7	306	100	8.22420002666e-06	0.000567225921114	1.0,1.0	0.809,0.47	0.361
14664	ENSG00000166278.16	C2	chr6	+	31935922	31936061	31933866	31933965	31937318	31937459	14664	1494,1223	20,19	1587,1772	4,7	239	100	8.27190397701e-06	0.00056864246305	0.969,0.964	0.994,0.991	-0.026
19613	ENSG00000123933.17	MXD4	chr4	-	2255154	2255351	2252407	2252522	2257981	2258011	19613	140,187	206,194	19,65	76,144	297	100	8.26238672491e-06	0.00056864246305	0.186,0.245	0.078,0.132	0.11
11352	ENSG00000010244.19	ZNF207	chr17	+	32366664	32366757	32365329	32365487	32367771	32368014	11352	1161,1252	2007,1989	487,1115	1655,2413	193	100	8.37656931818e-06	0.000574092866267	0.231,0.246	0.132,0.193	0.076
42534	ENSG00000213906.10	LTB4R2	chr14	+	24310170	24310255	24305733	24305867	24310654	24311145	42534	8,4	0,0	9,8	10,1	185	100	8.37861558078e-06	0.000574092866267	1.0,1.0	0.327,0.812	0.43
73947	ENSG00000138942.17	RNF185	chr22	+	31196935	31197157	31192683	31192702	31201497	31201615	73947	14,21	3,4	15,16	0,0	322	100	8.4125484564e-06	0.000575476047593	0.592,0.62	1.0,1.0	-0.394
25425	ENSG00000124164.16	VAPB	chr20	+	58438944	58439025	58434601	58434705	58440906	58441083	25425	396,490	0,0	280,381	2,17	181	100	8.4435457961e-06	0.000576654232877	1.0,1.0	0.987,0.925	0.044
37516	ENSG00000077152.12	UBE2T	chr1	-	202334988	202335058	202333449	202333555	202335645	202335818	37516	142,128	7,10	97,98	0,0	170	100	8.50922145568e-06	0.000580049075019	0.923,0.883	1.0,1.0	-0.097
45295	ENSG00000170242.19	USP47	chr11	+	11880176	11880380	11841971	11842224	11884466	11884499	45295	48,62	6,5	45,42	0,0	304	100	8.53481978291e-06	0.000580049075019	0.725,0.803	1.0,1.0	-0.236
71281	ENSG00000214013.10	GANC	chr15	+	42280916	42281133	42278481	42278590	42283610	42284389	71281	24,18	8,1	29,27	0,0	317	100	8.52232506332e-06	0.000580049075019	0.486,0.85	1.0,1.0	-0.332
12198	ENSG00000146856.14	AGBL3	chr7	+	134989249	134989310	134987874	134987996	135017051	135017207	12198	24,20	6,5	20,10	0,0	161	100	8.63369734816e-06	0.00058487012861	0.713,0.713	1.0,1.0	-0.287
16322	ENSG00000137409.21	MTCH1	chr6	-	36981587	36981672	36978504	36978611	36985852	36986173	16322	663,319	2,2	535,115	13,8	185	100	8.62943858893e-06	0.00058487012861	0.994,0.989	0.957,0.886	0.07
31309	ENSG00000109107.14	ALDOC	chr17	-	28575964	28576017	28575420	28575544	28576800	28576895	31309	7,0	184,130	23,6	172,72	153	100	8.90954383459e-06	0.000602581668231	0.024,0.0	0.08,0.052	-0.054
8509	ENSG00000184988.8	TMEM106A	chr17	+	43212314	43212394	43211834	43211922	43213020	43213252	8509	6,26	4,5	7,13	0,0	180	100	9.08339173422e-06	0.000613348701537	0.455,0.743	1.0,1.0	-0.401
79072	ENSG00000188878.20	FBF1	chr17	-	75935631	75935673	75932994	75933088	75937565	75937593	79072	3,4	2,4	0,0	6,2	142	100	9.09876732003e-06	0.000613397574643	0.514,0.413	0.0,0.0	0.464
1905	ENSG00000248751.6	ENSG00000248751	chr22	-	30286262	30286376	30286015	30286098	30286824	30286948	1905	16,11	6,2	2,3	0,0	214	100	9.13262490754e-06	0.000613703598321	0.555,0.72	1.0,1.0	-0.363
33422	ENSG00000132763.15	MMACHC	chr1	+	45507355	45507550	45500299	45500413	45508211	45508364	33422	201,210	11,12	155,143	0,2	295	100	9.11842327977e-06	0.000613703598321	0.861,0.856	1.0,0.96	-0.121
26443	ENSG00000177830.18	CHID1	chr11	-	908541	908645	904705	904859	910774	910816	26443	172,118	94,62	104,48	19,10	204	100	9.20341398447e-06	0.000617469433429	0.473,0.483	0.728,0.702	-0.237
21073	ENSG00000132199.20	ENOSF1	chr18	-	691067	691106	690548	690631	693881	693908	21073	10,4	2,6	9,3	0,0	139	100	9.34082030302e-06	0.000625685507177	0.782,0.324	1.0,1.0	-0.447
37271	ENSG00000185716.12	MOSMO	chr16	+	22085207	22085275	22075486	22075699	22085643	22085750	37271	0,0	13,14	4,7	11,14	168	100	9.3914025715e-06	0.000627519472371	0.0,0.0	0.178,0.229	-0.204
69666	ENSG00000103335.22	PIEZO1	chr16	-	88717536	88717615	88717022	88717211	88719573	88719721	69666	27,27	215,208	36,60	152,139	179	100	9.39817769441e-06	0.000627519472371	0.066,0.068	0.117,0.194	-0.088
59344	ENSG00000132600.18	PRMT7	chr16	+	68356029	68356215	68355722	68355883	68356700	68356797	59344	0,0	36,17	10,2	27,3	286	100	9.74291601852e-06	0.000648844580674	0.0,0.0	0.115,0.189	-0.152
70443	ENSG00000103174.13	NAGPA	chr16	-	5032990	5033155	5031744	5031884	5033272	5033338	70443	12,22	64,33	2,5	90,26	265	100	9.74855466962e-06	0.000648844580674	0.066,0.201	0.008,0.068	0.096
66610	ENSG00000111445.14	RFC5	chr12	+	118017689	118017815	118016700	118016892	118019071	118019136	66610	20,28	153,157	0,4	61,83	226	100	9.78653000405e-06	0.000650338220031	0.055,0.073	0.0,0.021	0.053
30174	ENSG00000182473.22	EXOC7	chr17	-	76090328	76090397	76089174	76089320	76091142	76091235	30174	13,14	17,27	9,14	1,3	169	100	9.82198661037e-06	0.000651660014965	0.312,0.235	0.842,0.734	-0.515
45908	ENSG00000155621.15	C9orf85	chr9	+	71941804	71941934	71911640	71911836	71947005	71947112	45908	6,12	21,24	1,0	13,26	230	100	9.90274986135e-06	0.000655978833774	0.11,0.179	0.032,0.0	0.129
8274	ENSG00000104325.7	DECR1	chr8	+	90005447	90005731	90001476	90001561	90017123	90017326	8274	4,0	101,88	13,2	38,16	384	100	1.00711515252e-05	0.000666080187366	0.01,0.0	0.082,0.032	-0.052
21678	ENSG00000102312.24	PORCN	chrX	+	48512834	48514141	48512588	48512719	48514239	48514625	21678	19,24	1,2	4,0	4,2	1407	100	1.00908641181e-05	0.000666331271773	0.575,0.46	0.066,0.0	0.484
42949	ENSG00000164542.13	KIAA0895	chr7	-	36336153	36336297	36335045	36335178	36356901	36357590	42949	13,1	2,3	5,6	0,0	244	100	1.01097129366e-05	0.000666524617466	0.727,0.12	1.0,1.0	-0.577
52085	ENSG00000111653.20	ING4	chr12	-	6655637	6655913	6653229	6653396	6656726	6656798	52085	22,26	49,36	0,7	42,22	376	100	1.0137167321e-05	0.000667283820588	0.107,0.161	0.0,0.078	0.095
69660	ENSG00000173511.10	VEGFB	chr11	+	64235812	64236009	64235457	64235500	64237186	64237222	69660	34,29	3,8	30,4	0,0	297	100	1.02240537925e-05	0.000671946643678	0.792,0.55	1.0,1.0	-0.329
23018	ENSG00000115128.7	SF3B6	chr2	-	24074075	24074194	24068320	24068459	24076199	24076326	23018	865,778	29,21	813,895	10,5	219	100	1.02777146515e-05	0.000671974696872	0.932,0.944	0.974,0.988	-0.043
57077	ENSG00000124275.15	MTRR	chr5	+	7873372	7873512	7870769	7870923	7875257	7875375	57077	97,82	55,70	46,29	61,101	240	100	1.02842184801e-05	0.000671974696872	0.424,0.328	0.239,0.107	0.203
65397	ENSG00000135655.16	USP15	chr12	+	62349220	62349307	62325871	62325933	62355330	62355475	65397	37,43	19,8	8,32	23,50	187	100	1.0288684598e-05	0.000671974696872	0.51,0.742	0.157,0.255	0.42
65559	ENSG00000166225.9	FRS2	chr12	+	69537915	69537983	69532013	69532056	69562179	69562274	65559	4,6	9,6	0,0	7,10	168	100	1.0262752517e-05	0.000671974696872	0.209,0.373	0.0,0.0	0.291
20420	ENSG00000148334.16	PTGES2	chr9	-	128125895	128126260	128125243	128125441	128127438	128127726	20420	4,1	35,33	15,8	25,2	465	100	1.03605025098e-05	0.000675358352078	0.024,0.006	0.114,0.462	-0.273
77021	ENSG00000171634.19	BPTF	chr17	+	67886127	67886316	67875555	67875744	67891843	67891962	77021	101,116	20,20	82,119	4,4	289	100	1.03727557718e-05	0.000675358352078	0.636,0.667	0.876,0.911	-0.242
30175	ENSG00000182473.22	EXOC7	chr17	-	76090328	76090397	76089174	76089320	76094413	76094581	30175	6,11	145,124	11,10	24,37	169	100	1.04396938134e-05	0.000678661151394	0.024,0.05	0.213,0.138	-0.138
32001	ENSG00000163608.15	NEPRO	chr3	-	113017447	113017602	113013948	113014032	113019541	113019644	32001	61,20	1,2	30,10	12,4	255	100	1.05016490862e-05	0.000681630293014	0.96,0.797	0.495,0.495	0.384
31930	ENSG00000132780.17	NASP	chr1	+	45616700	45616703	45616336	45616393	45617462	45617591	31930	17,15	38,28	29,27	17,12	103	100	1.0571694578e-05	0.000684055631388	0.303,0.342	0.624,0.686	-0.333
33697	ENSG00000255526.6	NEDD8-MDP1	chr14	-	24231651	24231867	24218383	24218431	24232249	24232285	33697	205,181	3915,3309	124,119	4244,5586	316	100	1.0557464182e-05	0.000684055631388	0.016,0.017	0.009,0.007	0.009
13769	ENSG00000169682.18	SPNS1	chr16	+	28981900	28982056	28981454	28981615	28982355	28982545	13769	678,552	40,34	284,147	4,2	256	100	1.07113154276e-05	0.000692020401816	0.869,0.864	0.965,0.966	-0.099
56016	ENSG00000132970.14	WASF3	chr13	+	26676548	26676724	26671871	26671989	26680034	26680201	56016	175,146	5,3	81,92	8,17	276	100	1.08232070863e-05	0.000698171902416	0.927,0.946	0.786,0.662	0.213
29419	ENSG00000032219.19	ARID4A	chr14	+	58347019	58347117	58346410	58346505	58347646	58347878	29419	41,39	3,7	30,66	0,0	198	100	1.08597467822e-05	0.000699451229287	0.873,0.738	1.0,1.0	-0.195
26863	ENSG00000135486.19	HNRNPA1	chr12	+	54283062	54283234	54282799	54282874	54283811	54283967	26863	659,646	6642,7310	191,142	2832,3130	272	100	1.09565265546e-05	0.000704600590182	0.035,0.031	0.024,0.016	0.013
22691	ENSG00000113569.16	NUP155	chr5	-	37307296	37307432	37305056	37305210	37309128	37309267	22691	202,143	7,8	207,220	1,0	236	100	1.09985442452e-05	0.000706217875499	0.924,0.883	0.989,1.0	-0.091
43457	ENSG00000138399.18	FASTKD1	chr2	-	169560386	169560785	169557186	169557297	169563224	169563350	43457	111,114	8,2	135,184	0,0	499	100	1.10527584977e-05	0.000706448449628	0.735,0.92	1.0,1.0	-0.172
53806	ENSG00000164038.16	SLC9B2	chr4	-	103028746	103028883	103022252	103026591	103031699	103031808	53806	82,55	2,0	56,30	7,7	237	100	1.10471342353e-05	0.000706448449628	0.945,1.0	0.771,0.644	0.265
79325	ENSG00000167491.18	GATAD2A	chr19	+	19501968	19502043	19501117	19501416	19502330	19502526	79325	23,14	6,4	16,8	0,0	175	100	1.10273752904e-05	0.000706448449628	0.687,0.667	1.0,1.0	-0.323
64822	ENSG00000050426.16	LETMD1	chr12	+	51052087	51052207	51049033	51049185	51053777	51053860	64822	35,43	16,12	38,30	1,2	220	100	1.1205010191e-05	0.000715088036046	0.499,0.62	0.945,0.872	-0.349
66672	ENSG00000139714.12	MORN3	chr12	-	121653074	121653259	121652727	121652808	121654273	121654433	66672	12,8	4,2	2,1	0,0	285	100	1.12591434727e-05	0.000717449073797	0.513,0.584	1.0,1.0	-0.452
34947	ENSG00000176261.16	ZBTB8OS	chr1	-	32634701	32634792	32633950	32634110	32650432	32650525	34947	111,175	50,57	141,206	4,36	191	100	1.13477615029e-05	0.000720575402929	0.538,0.616	0.949,0.75	-0.272
38759	ENSG00000138095.20	LRPPRC	chr2	-	43895367	43895566	43894544	43894629	43896418	43896544	38759	3,4	0,0	12,14	4,4	299	100	1.13745954007e-05	0.000720575402929	1.0,1.0	0.501,0.539	0.48
39932	ENSG00000143303.12	METTL25B	chr1	+	156734008	156734493	156733376	156733520	156735724	156735909	39932	33,28	7,1	21,4	0,0	585	100	1.13770534178e-05	0.000720575402929	0.446,0.827	1.0,1.0	-0.364
52582	ENSG00000104529.19	EEF1D	chr8	-	143590607	143590735	143589694	143590081	143592646	143592893	52582	12,11	26,13	0,0	11,2	228	100	1.1357199614e-05	0.000720575402929	0.168,0.271	0.0,0.0	0.22
70758	ENSG00000276550.5	HERC2P2	chr15	+	22547880	22548072	22546937	22547089	22554384	22554572	70758	16,12	0,0	13,4	2,3	292	100	1.14031533497e-05	0.000721137484872	1.0,1.0	0.69,0.313	0.499
37179	ENSG00000070831.18	CDC42	chr1	+	22074093	22074219	22052626	22052742	22078428	22078583	37179	11,10	107,91	26,13	43,47	226	100	1.14211643687e-05	0.000721187098485	0.044,0.046	0.211,0.109	-0.115
1636	ENSG00000184381.20	PLA2G6	chr22	-	38128268	38128430	38126370	38126449	38129453	38129562	1636	34,33	4,7	28,8	0,0	262	100	1.14509262963e-05	0.000721977453908	0.764,0.643	1.0,1.0	-0.296
46602	ENSG00000144711.16	IQSEC1	chr3	-	12902772	12902822	12897042	12901522	12908348	12908525	46602	80,58	181,168	35,37	30,39	150	100	1.1494521483e-05	0.000723636303588	0.228,0.187	0.438,0.387	-0.205
53305	ENSG00000188647.13	PTAR1	chr9	-	69723325	69723630	69709521	69718684	69732138	69732352	53305	116,88	6,5	162,167	0,1	405	100	1.18173264639e-05	0.000742841400017	0.827,0.813	1.0,0.976	-0.168
24320	ENSG00000178904.19	DPY19L3	chr19	+	32467473	32468813	32464727	32464784	32477521	32477654	24320	157,174	0,0	89,94	1,6	1440	100	1.18458760556e-05	0.000743519641781	1.0,1.0	0.861,0.521	0.309
34222	ENSG00000122884.13	P4HA1	chr10	-	73043886	73043957	73030266	73030370	73044980	73045051	34222	422,331	323,260	415,443	154,219	171	100	1.20031224735e-05	0.000752261560409	0.433,0.427	0.612,0.542	-0.147
39909	ENSG00000188428.20	BLOC1S5	chr6	-	8027206	8027399	8026366	8026425	8041138	8041268	39909	39,57	49,62	13,17	64,42	293	100	1.20585440163e-05	0.000753845143947	0.214,0.239	0.065,0.121	0.133
63414	ENSG00000110074.12	FOXRED1	chr11	+	126274926	126275021	126271997	126273454	126275326	126275428	63414	52,38	9,9	56,37	0,2	195	100	1.20644033547e-05	0.000753845143947	0.748,0.684	1.0,0.905	-0.237
11653	ENSG00000146067.17	FAM193B	chr5	-	177547167	177547228	177538904	177539147	177554248	177554458	11653	7,3	4,2	8,2	0,0	161	100	1.21810421451e-05	0.000756616215734	0.521,0.482	1.0,1.0	-0.498
34699	ENSG00000119446.14	RBM18	chr9	-	122254273	122254367	122251846	122251973	122261379	122261508	34699	0,0	13,13	2,12	12,14	194	100	1.21453762121e-05	0.000756616215734	0.0,0.0	0.079,0.306	-0.193
59890	ENSG00000095139.15	ARCN1	chr11	+	118581245	118581509	118572408	118572550	118583178	118583358	59890	646,736	20,24	671,739	4,8	364	100	1.21675352227e-05	0.000756616215734	0.899,0.894	0.979,0.962	-0.074
67949	ENSG00000136153.20	LMO7	chr13	+	75805478	75805760	75804173	75804541	75817160	75817278	67949	27,5	24,29	2,2	10,50	382	100	1.21489312397e-05	0.000756616215734	0.228,0.043	0.05,0.01	0.106
49752	ENSG00000123240.17	OPTN	chr10	+	13108137	13108289	13100162	13100302	13109111	13109288	49752	29,53	104,81	76,74	67,30	252	100	1.2354602081e-05	0.000766259875735	0.1,0.206	0.31,0.495	-0.249
42998	ENSG00000080345.18	RIF1	chr2	+	151468473	151468551	151467999	151468146	151468640	151468756	42998	46,67	55,43	10,19	35,57	178	100	1.23835205111e-05	0.000766917287274	0.32,0.467	0.138,0.158	0.245
11909	ENSG00000100294.13	MCAT	chr22	-	43137080	43137298	43132208	43133486	43141161	43141249	11909	109,69	13,11	76,47	0,2	318	100	1.24064552968e-05	0.000767202734122	0.725,0.664	1.0,0.881	-0.246
66892	ENSG00000196498.14	NCOR2	chr12	-	124340601	124340694	124340293	124340443	124341822	124342055	66892	109,86	13,7	42,73	1,0	193	100	1.25205589434e-05	0.000773116814403	0.813,0.864	0.956,1.0	-0.139
41376	ENSG00000116584.22	ARHGEF2	chr1	-	155965630	155965760	155965302	155965412	155966415	155966479	41376	81,83	0,1	43,26	7,2	230	100	1.26500188008e-05	0.000779960290273	1.0,0.973	0.728,0.85	0.198
37256	ENSG00000161526.15	SAP30BP	chr17	+	75703310	75703371	75702479	75702571	75704755	75704768	37256	113,98	10,5	124,113	1,0	161	100	1.2773328786e-05	0.000786405014156	0.875,0.924	0.987,1.0	-0.094
53869	ENSG00000204852.17	TCTN1	chr12	+	110634395	110634463	110632471	110632559	110634669	110634779	53869	1,0	35,28	6,4	18,8	168	100	1.28418352751e-05	0.00078946172363	0.017,0.0	0.166,0.229	-0.189
44086	ENSG00000070882.13	OSBPL3	chr7	-	24863199	24863292	24861612	24861769	24863495	24863599	44086	25,17	1,0	27,20	6,8	193	100	1.28861881947e-05	0.000791026787054	0.928,1.0	0.7,0.564	0.332
23606	ENSG00000188313.13	PLSCR1	chr3	-	146536539	146536565	146533469	146533550	146544466	146544530	23606	173,224	13,9	100,78	20,16	126	100	1.29079929029e-05	0.00079120515795	0.914,0.952	0.799,0.795	0.136
67647	ENSG00000178761.15	FAM219B	chr15	-	74906277	74906365	74904663	74905231	74906586	74906730	67647	21,18	6,5	14,4	0,0	188	100	1.30205742588e-05	0.000796939095533	0.651,0.657	1.0,1.0	-0.346
3234	ENSG00000101017.15	CD40	chr20	+	46121723	46121898	46118343	46118394	46122232	46122358	3234	24,33	5,4	20,17	0,0	275	100	1.30879357895e-05	0.000799614695627	0.636,0.75	1.0,1.0	-0.307
4430	ENSG00000170889.14	RPS9	chr19	+	54206552	54206724	54206275	54206462	54207397	54207522	4430	43,46	709,561	16,5	565,309	272	100	1.31202264116e-05	0.000799614695627	0.022,0.029	0.01,0.006	0.018
65235	ENSG00000135423.13	GLS2	chr12	-	56479051	56479147	56478182	56478262	56479779	56479901	65235	16,12	5,4	8,7	0,0	196	100	1.3121588341e-05	0.000799614695627	0.62,0.605	1.0,1.0	-0.387
33628	ENSG00000068745.15	IP6K2	chr3	-	48711366	48711459	48695089	48695418	48715314	48715527	33628	16,13	57,38	2,0	39,14	193	100	1.31936282004e-05	0.000801670892032	0.127,0.151	0.026,0.0	0.126
60982	ENSG00000124920.14	MYRF	chr11	+	61769259	61769321	61765957	61766221	61771499	61771750	60982	63,68	25,16	10,4	0,0	162	100	1.31872432895e-05	0.000801670892032	0.609,0.724	1.0,1.0	-0.334
45762	ENSG00000147162.15	OGT	chrX	+	71546343	71546489	71544566	71545037	71547906	71548023	45762	32,22	6,2	50,21	0,0	246	100	1.331268924e-05	0.000807732949323	0.684,0.817	1.0,1.0	-0.25
4416	ENSG00000167618.10	LAIR2	chr19	+	54509034	54509085	54507890	54508184	54510525	54510687	4416	4,10	0,0	11,6	2,5	151	100	1.34185897807e-05	0.000811805290707	1.0,1.0	0.785,0.443	0.386
38739	ENSG00000135338.14	LCA5	chr6	-	79525163	79525269	79518704	79519085	79537164	79537430	38739	7,7	8,2	0,0	2,2	206	100	1.34027047959e-05	0.000811805290707	0.298,0.629	0.0,0.0	0.464
39633	ENSG00000114744.9	COMMD2	chr3	-	149750256	149750382	149741389	149741718	149750677	149750851	39633	30,37	151,137	14,20	147,266	226	100	1.37348000833e-05	0.000828540930097	0.081,0.107	0.04,0.032	0.058
52580	ENSG00000104529.19	EEF1D	chr8	-	143590607	143590729	143589510	143590081	143592646	143592942	52580	12,10	26,13	0,0	11,2	222	100	1.37211466603e-05	0.000828540930097	0.172,0.257	0.0,0.0	0.214
1973	ENSG00000183765.23	CHEK2	chr22	-	28703504	28703566	28699763	28699937	28710005	28710059	1973	414,529	73,88	520,1032	49,82	162	100	1.38460574474e-05	0.000832118074393	0.778,0.788	0.868,0.886	-0.094
5407	ENSG00000161265.15	U2AF1L4	chr19	-	35744625	35744738	35744069	35744421	35745124	35745176	5407	10,14	7,10	16,17	1,1	213	100	1.3853727406e-05	0.000832118074393	0.401,0.397	0.883,0.889	-0.487
7912	ENSG00000122515.16	ZMIZ2	chr7	+	44749814	44749980	44748861	44748991	44756187	44756299	7912	13,14	4,3	4,8	0,0	266	100	1.38328622085e-05	0.000832118074393	0.55,0.637	1.0,1.0	-0.406
3066	ENSG00000132819.17	RBM38	chr20	+	57393278	57393333	57392653	57392777	57407542	57407776	3066	525,561	26,36	110,134	13,32	155	100	1.38861031166e-05	0.000832867775038	0.929,0.91	0.845,0.73	0.132
2170	ENSG00000100038.20	TOP3B	chr22	-	21975980	21976187	21975639	21975807	21982729	21982787	2170	22,9	66,49	6,0	99,23	307	100	1.41220696983e-05	0.000845808938368	0.098,0.056	0.019,0.0	0.068
14262	ENSG00000250722.6	SELENOP	chr5	-	42810690	42810778	42808150	42808366	42811835	42811893	14262	167,88	558,379	192,54	378,53	188	100	1.42025844042e-05	0.000849415994403	0.137,0.11	0.213,0.351	-0.158
73140	ENSG00000258867.8	LINC01146	chr14	+	88025406	88025481	88024518	88024669	88044614	88044848	73140	14,22	5,10	1,8	0,0	175	100	1.43425669707e-05	0.000856564288486	0.615,0.557	1.0,1.0	-0.414
31319	ENSG00000214293.11	APTR	chr7	-	77661197	77661333	77657658	77659318	77685201	77685328	31319	6,22	0,2	0,2	2,2	236	100	1.43645594437e-05	0.000856655671098	1.0,0.823	0.0,0.298	0.762
62390	ENSG00000166012.17	TAF1D	chr11	-	93733349	93733419	93732243	93732291	93734624	93734660	62390	23,25	3,6	15,37	0,0	170	100	1.44030949889e-05	0.000857731965449	0.819,0.71	1.0,1.0	-0.236
61789	ENSG00000105655.19	ISYNA1	chr19	-	18436972	18437105	18436329	18436479	18437598	18437760	61789	8,10	6,1	5,4	0,0	233	100	1.46370352245e-05	0.000870425397264	0.364,0.811	1.0,1.0	-0.412
18431	ENSG00000125386.16	FAM193A	chr4	+	2655057	2655129	2646684	2646832	2657802	2657880	18431	10,18	35,41	0,2	14,31	172	100	1.47015001573e-05	0.000871782300404	0.142,0.203	0.0,0.036	0.154
59028	ENSG00000188690.15	UROS	chr10	-	125798064	125798145	125796102	125796188	125807412	125807465	59028	93,77	10,13	67,93	0,3	181	100	1.46855900861e-05	0.000871782300404	0.837,0.766	1.0,0.945	-0.171
14808	ENSG00000198369.10	SPRED2	chr2	-	65334604	65334773	65331986	65332051	65344718	65344799	14808	419,495	8,12	368,360	0,0	269	100	1.48612344926e-05	0.000878764946374	0.951,0.939	1.0,1.0	-0.055
42793	ENSG00000170088.14	TMEM192	chr4	-	165111648	165111679	165102949	165103096	165112746	165112854	42793	12,15	148,100	22,22	66,23	131	100	1.48584784031e-05	0.000878764946374	0.058,0.103	0.203,0.422	-0.232
17511	ENSG00000109184.15	DCUN1D4	chr4	+	51848204	51848367	51843578	51843742	51863436	51863507	17511	13,3	8,1	14,14	0,1	263	100	1.50443613648e-05	0.000888338770857	0.382,0.533	1.0,0.842	-0.464
9551	ENSG00000183010.17	PYCR1	chr17	-	81934652	81934745	81932383	81933376	81934925	81935147	9551	117,69	13,4	82,5	0,0	193	100	1.51310549242e-05	0.000892199456904	0.823,0.899	1.0,1.0	-0.139
7315	ENSG00000157625.16	TAB3	chrX	-	30845932	30846071	30842987	30843049	30846550	30846644	7315	12,22	188,163	8,2	180,287	239	100	1.51794393822e-05	0.000893793572062	0.026,0.053	0.018,0.003	0.029
57098	ENSG00000204147.11	ASAH2B	chr10	+	50745127	50745274	50742914	50743010	50749342	50749402	57098	8,12	2,4	15,4	0,0	247	100	1.52760385995e-05	0.000898218196584	0.618,0.548	1.0,1.0	-0.417
5510	ENSG00000126261.13	UBA2	chr19	+	34460469	34460566	34458713	34458924	34464025	34464119	5510	449,328	12,14	390,564	2,4	197	100	1.53165070659e-05	0.000899334597916	0.95,0.922	0.99,0.986	-0.052
1985	ENSG00000183765.23	CHEK2	chr22	-	28734402	28734727	28725242	28725367	28741768	28741783	1985	330,324	1,3	112,155	8,6	425	100	1.57451015264e-05	0.000918062222009	0.987,0.962	0.767,0.859	0.161
16325	ENSG00000074603.19	DPP8	chr15	-	65454262	65454415	65451959	65452102	65456224	65456371	16325	63,72	6,13	71,60	2,0	253	100	1.57243477217e-05	0.000918062222009	0.806,0.686	0.933,1.0	-0.221
40663	ENSG00000213213.14	CCDC183	chr9	+	136805356	136805457	136804761	136804816	136806077	136806238	40663	301,189	20,28	1053,560	33,20	201	100	1.5686564618e-05	0.000918062222009	0.882,0.771	0.941,0.933	-0.111
42446	ENSG00000131236.18	CAP1	chr1	+	40041428	40041493	40040731	40040801	40059333	40059458	42446	11,7	26,29	0,4	77,25	165	100	1.56872781508e-05	0.000918062222009	0.204,0.128	0.0,0.088	0.122
62392	ENSG00000166012.17	TAF1D	chr11	-	93733349	93733505	93732243	93732291	93734624	93734660	62392	58,65	3,6	100,133	0,0	256	100	1.57263662898e-05	0.000918062222009	0.883,0.809	1.0,1.0	-0.154
11142	ENSG00000160685.14	ZBTB7B	chr1	+	155010915	155011015	155010257	155010397	155014014	155014093	11142	5,6	3,2	3,2	0,0	200	100	1.58617680859e-05	0.000923578471372	0.455,0.6	1.0,1.0	-0.473
15306	ENSG00000128536.16	CDHR3	chr7	+	106017845	106018072	106015926	106016025	106020372	106020544	15306	39,94	13,4	30,33	0,0	327	100	1.58852739981e-05	0.000923662494348	0.478,0.878	1.0,1.0	-0.322
53885	ENSG00000204852.17	TCTN1	chr12	+	110644966	110645129	110640382	110640517	110647210	110647336	53885	39,54	5,5	12,2	10,3	263	100	1.59201700867e-05	0.000924407656976	0.748,0.804	0.313,0.202	0.518
44990	ENSG00000226453.4	LINC02542	chr6	-	81928856	81928901	81844603	81845909	81938320	81938452	44990	7,1	1,2	0,0	2,1	145	100	1.608097201e-05	0.000932451375621	0.828,0.256	0.0,0.0	0.542
51505	ENSG00000167323.13	STIM1	chr11	+	4084672	4084765	4083262	4083498	4086476	4086543	51505	1,1	37,25	4,6	11,7	193	100	1.61478555303e-05	0.000935034539109	0.014,0.02	0.159,0.308	-0.216
21075	ENSG00000132199.20	ENOSF1	chr18	-	691203	691276	690548	690631	693881	693908	21075	17,12	2,6	22,6	0,0	173	100	1.6253476904e-05	0.000939850567108	0.831,0.536	1.0,1.0	-0.317
29498	ENSG00000251136.11	RIPK2-DT	chr8	-	89725517	89725641	89723769	89724966	89757044	89757383	29498	35,38	4,5	18,62	0,0	224	100	1.62916378168e-05	0.000940757816828	0.796,0.772	1.0,1.0	-0.216
929	ENSG00000126768.13	TIMM17B	chrX	-	48895351	48895454	48895037	48895101	48896758	48896858	929	3,7	116,65	11,11	49,12	203	100	1.65118975328e-05	0.000946191986833	0.013,0.05	0.1,0.311	-0.174
2944	ENSG00000130706.13	ADRM1	chr20	+	62304460	62304577	62303567	62303781	62306196	62306320	2944	998,645	21,10	903,425	40,27	217	100	1.64710746765e-05	0.000946191986833	0.956,0.967	0.912,0.879	0.066
10150	ENSG00000112624.13	BICRAL	chr6	+	42810305	42810401	42782031	42782101	42822017	42822063	10150	13,16	6,5	0,2	2,8	196	100	1.65148376688e-05	0.000946191986833	0.525,0.62	0.0,0.113	0.516
43935	ENSG00000148459.16	PDSS1	chr10	+	26740644	26740817	26735465	26735579	26742496	26742577	43935	6,19	41,13	1,2	46,25	273	100	1.643724828e-05	0.000946191986833	0.051,0.349	0.008,0.028	0.182
50908	ENSG00000266074.11	BAHCC1	chr17	+	81446737	81446830	81445353	81445681	81447035	81447848	50908	21,13	26,40	0,0	6,6	193	100	1.65213505882e-05	0.000946191986833	0.295,0.144	0.0,0.0	0.219
63519	ENSG00000229425.5	ENSG00000229425	chr21	-	15400497	15400549	15395462	15395497	15444023	15444081	63519	1,4	4,1	5,6	0,0	152	100	1.64883772862e-05	0.000946191986833	0.141,0.725	1.0,1.0	-0.567
76607	ENSG00000115459.18	ELMOD3	chr2	+	85355075	85355170	85354393	85354829	85355554	85355598	76607	23,7	4,6	39,14	1,0	195	100	1.66635454107e-05	0.000953031869698	0.747,0.374	0.952,1.0	-0.415
49359	ENSG00000151690.15	MFSD6	chr2	+	190415291	190415413	190408354	190408503	190435976	190437561	49359	2,2	0,1	0,0	2,6	222	100	1.69495152476e-05	0.000967885528253	1.0,0.474	0.0,0.0	0.737
60779	ENSG00000139631.20	CSAD	chr12	-	53171176	53171441	53170422	53170502	53171881	53171988	60779	26,38	8,1	2,2	15,1	365	100	1.69694966616e-05	0.000967885528253	0.471,0.912	0.035,0.354	0.497
57275	ENSG00000161091.14	MFSD12	chr19	-	3546254	3546425	3546073	3546168	3547271	3547331	57275	23,24	2,9	15,2	0,0	271	100	1.70212826718e-05	0.000969518366061	0.809,0.496	1.0,1.0	-0.347
73448	ENSG00000157045.9	NTAN1	chr16	-	15047996	15048099	15047854	15047920	15055890	15056074	73448	300,273	47,52	412,211	36,8	203	100	1.70750942786e-05	0.000969944127508	0.759,0.721	0.849,0.929	-0.149
77416	ENSG00000183077.16	AFMID	chr17	+	78204827	78204900	78190969	78191060	78205945	78206050	77416	33,19	4,5	37,20	0,0	173	100	1.70539983327e-05	0.000969944127508	0.827,0.687	1.0,1.0	-0.243
79297	ENSG00000104067.17	TJP1	chr15	-	29719776	29720016	29718265	29719138	29720357	29720708	79297	172,132	109,122	87,240	31,85	340	100	1.7143032031e-05	0.000972483788588	0.317,0.241	0.452,0.454	-0.174
28426	ENSG00000144504.16	ANKMY1	chr2	-	240557189	240557352	240554865	240555055	240560730	240561064	28426	6,4	5,5	0,0	9,2	263	100	1.7282945535e-05	0.000979094066066	0.313,0.233	0.0,0.0	0.273
34201	ENSG00000155542.12	SETD9	chr5	+	56911168	56911536	56909351	56909743	56913010	56913134	34201	27,15	4,2	25,28	0,0	468	100	1.73833075705e-05	0.000983448880323	0.591,0.616	1.0,1.0	-0.397
6502	ENSG00000145216.16	FIP1L1	chr4	+	53391429	53391498	53391008	53391139	53399729	53399839	6502	142,191	77,104	49,63	49,99	169	100	1.74864986712e-05	0.000986620305754	0.522,0.521	0.372,0.274	0.199
33963	ENSG00000129187.15	DCTD	chr4	-	182916418	182916539	182915460	182915575	182917310	182917443	33963	31,31	24,14	32,79	6,5	221	100	1.74732252093e-05	0.000986620305754	0.369,0.5	0.707,0.877	-0.358
36127	ENSG00000130731.16	METTL26	chr16	-	634888	635063	634718	634797	635280	635340	36127	184,149	35,31	69,31	34,22	275	100	1.77408074202e-05	0.00099715822964	0.657,0.636	0.425,0.339	0.265
61525	ENSG00000175634.15	RPS6KB2	chr11	+	67428912	67429022	67428493	67428623	67429119	67429240	61525	16,12	7,1	18,8	0,0	210	100	1.77447242585e-05	0.00099715822964	0.521,0.851	1.0,1.0	-0.314
69419	ENSG00000090060.19	PAPOLA	chr14	+	96560648	96560711	96556174	96556413	96564954	96564988	69419	139,106	30,32	133,204	15,14	163	100	1.77372675028e-05	0.00099715822964	0.74,0.67	0.845,0.899	-0.167
19916	ENSG00000118985.16	ELL2	chr5	-	95913770	95913934	95906522	95906782	95943001	95943049	19916	1150,1228	4,7	453,934	10,18	264	100	1.78536485834e-05	0.0010019343136	0.991,0.985	0.945,0.952	0.04
74814	ENSG00000126562.17	WNK4	chr17	+	42793591	42793729	42788680	42788797	42794613	42794668	74814	103,144	14,20	139,102	5,2	238	100	1.78781224741e-05	0.00100196465512	0.756,0.752	0.921,0.955	-0.184
33293	ENSG00000143742.14	SRP9	chr1	+	225786861	225786985	225783299	225783368	225789258	225790468	33293	19,17	10,12	9,3	21,21	224	100	1.80124101373e-05	0.00100814111016	0.459,0.387	0.161,0.06	0.313
3048	ENSG00000124222.22	STX16	chr20	+	58669301	58669453	58667986	58668127	58670511	58670603	3048	175,157	53,48	81,106	47,83	252	100	1.80868732811e-05	0.0010109572095	0.567,0.565	0.406,0.336	0.195
51703	ENSG00000091262.17	ABCC6	chr16	-	16162992	16163192	16161437	16161564	16165622	16165933	51703	26,33	8,2	31,4	0,0	300	100	1.81254303837e-05	0.00101176152402	0.52,0.846	1.0,1.0	-0.317
35800	ENSG00000056586.16	RC3H2	chr9	-	122851322	122851436	122851080	122851229	122853951	122854086	35800	89,54	20,18	114,166	5,15	214	100	1.82465201268e-05	0.0010171645341	0.675,0.584	0.914,0.838	-0.247
67102	ENSG00000165475.15	CRYL1	chr13	-	20418397	20419084	20413281	20413387	20432101	20432296	67102	16,13	200,174	12,37	139,66	787	100	1.84711533497e-05	0.00102831759971	0.01,0.009	0.011,0.066	-0.029
1813	ENSG00000198089.16	SFI1	chr22	+	31602211	31602293	31589446	31589577	31606327	31606430	1813	18,14	5,4	7,11	0,0	182	100	1.86007558183e-05	0.00103326924662	0.664,0.658	1.0,1.0	-0.339
9446	ENSG00000071626.17	DAZAP1	chr19	+	1425877	1425960	1422347	1422396	1428841	1428995	9446	1456,1428	55,30	1458,2058	24,18	183	100	1.86094592607e-05	0.00103326924662	0.935,0.963	0.971,0.984	-0.028
73540	ENSG00000168434.13	COG7	chr16	-	23391961	23392234	23388775	23389086	23392379	23392523	73540	10,8	111,123	17,7	34,31	373	100	1.86720339477e-05	0.00103453100431	0.024,0.017	0.118,0.057	-0.067
75573	ENSG00000166579.16	NDEL1	chr17	+	8443926	8444176	8435921	8436045	8444259	8444357	75573	5,8	86,119	13,14	32,60	350	100	1.86816060972e-05	0.00103453100431	0.016,0.019	0.104,0.063	-0.066
55615	ENSG00000130559.19	CAMSAP1	chr9	-	135862466	135862608	135827406	135827584	135866455	135866536	55615	16,14	2,4	14,26	0,0	242	100	1.87587205694e-05	0.00103478640709	0.768,0.591	1.0,1.0	-0.321
65237	ENSG00000135423.13	GLS2	chr12	-	56479051	56479181	56478182	56478262	56479779	56479901	65237	27,28	5,4	26,13	0,0	230	100	1.87325776156e-05	0.00103478640709	0.701,0.753	1.0,1.0	-0.273
77948	ENSG00000101782.15	RIOK3	chr18	+	23467398	23467526	23466132	23466276	23473428	23473483	77948	135,73	10,6	232,240	4,1	228	100	1.87603698311e-05	0.00103478640709	0.856,0.842	0.962,0.991	-0.127
57697	ENSG00000225484.7	NUTM2B-AS1	chr10	-	79808762	79808832	79806038	79806122	79814612	79814716	57697	60,43	1,7	32,44	26,16	170	100	1.87988716723e-05	0.00103554574021	0.972,0.783	0.42,0.618	0.358
22225	ENSG00000176809.11	LRRC37A3	chr17	-	64889680	64889752	64869094	64869166	64892528	64892600	22225	2,0	12,6	3,7	2,2	172	100	1.90391588258e-05	0.00104740392147	0.088,0.0	0.466,0.67	-0.524
9118	ENSG00000101266.19	CSNK2A1	chr20	-	539674	539824	508450	508660	543053	543239	9118	0,2	1,2	6,1	0,0	250	100	1.91353723964e-05	0.00105131544013	0.0,0.286	1.0,1.0	-0.857
19361	ENSG00000055957.11	ITIH1	chr3	+	52788231	52788345	52787824	52788066	52789652	52789723	19361	112,129	7,13	93,103	0,2	214	100	1.92423825081e-05	0.00105580910053	0.882,0.823	1.0,0.96	-0.127
15574	ENSG00000285733.1	ENSG00000285733	chr6	-	169572418	169572540	169458220	169458464	169582835	169582934	15574	1,1	1,2	2,2	0,0	222	100	1.92997092273e-05	0.00105756849058	0.311,0.184	1.0,1.0	-0.752
40128	ENSG00000058866.15	DGKG	chr3	-	186188201	186188379	186164897	186165018	186211794	186211885	40128	18,33	8,2	17,16	0,0	278	100	1.93823242252e-05	0.00106070719436	0.447,0.856	1.0,1.0	-0.349
9779	ENSG00000078900.15	TP73	chr1	+	3729999	3730148	3729326	3729448	3730926	3731065	9779	11,11	0,0	0,2	1,2	249	100	1.9564816198e-05	0.00106929638398	1.0,1.0	0.0,0.287	0.857
75216	ENSG00000175063.17	UBE2C	chr20	+	45814383	45814470	45813436	45813464	45815540	45815745	75216	1021,967	40,39	793,798	17,6	187	100	1.96191986862e-05	0.00107087060365	0.932,0.93	0.961,0.986	-0.042
54806	ENSG00000119314.16	PTBP3	chr9	-	112275843	112276013	112268048	112268195	112297840	112297916	54806	75,67	12,5	65,94	0,2	270	100	1.96930976516e-05	0.0010735046005	0.698,0.832	1.0,0.946	-0.208
22124	ENSG00000183844.17	FAM3B	chr21	+	41322922	41323066	41316800	41316898	41338377	41338501	22124	118,104	9,12	44,14	0,0	244	100	1.97845621761e-05	0.00107708803056	0.843,0.78	1.0,1.0	-0.189
31715	ENSG00000188529.15	SRSF10	chr1	-	23971572	23971626	23964803	23967723	23971849	23972012	31715	296,251	9,9	284,409	20,50	154	100	1.99139835139e-05	0.00108272586988	0.955,0.948	0.902,0.842	0.08
30398	ENSG00000113161.17	HMGCR	chr5	+	75340447	75340688	75337269	75337300	75342582	75342770	30398	3,1	90,103	7,4	19,13	341	100	2.00451467254e-05	0.00108841289147	0.01,0.003	0.098,0.083	-0.084
55680	ENSG00000011105.14	TSPAN9	chr12	+	3083652	3083719	3077376	3077453	3201176	3201256	55680	24,14	5,3	23,24	0,0	167	100	2.00705781014e-05	0.00108841289147	0.742,0.736	1.0,1.0	-0.261
48366	ENSG00000141756.19	FKBP10	chr17	+	41819840	41820023	41819254	41819399	41820268	41820461	48366	175,169	12,3	154,91	0,0	283	100	2.01017314251e-05	0.0010886920907	0.837,0.952	1.0,1.0	-0.106
30943	ENSG00000068885.15	IFT80	chr3	-	160391545	160391643	160383436	160384646	160399145	160399209	30943	4,15	12,9	0,1	9,12	198	100	2.04048713177e-05	0.00110368209007	0.144,0.457	0.0,0.04	0.28
31310	ENSG00000109107.14	ALDOC	chr17	-	28575964	28576020	28575420	28575544	28576800	28576948	31310	13,9	184,130	38,16	172,72	156	100	2.045919727e-05	0.00110376841973	0.043,0.042	0.124,0.125	-0.082
45010	ENSG00000197713.15	RPE	chr2	+	210016203	210016257	210015972	210016112	210016506	210016597	45010	29,20	151,145	7,2	129,86	154	100	2.04329634684e-05	0.00110376841973	0.111,0.082	0.034,0.015	0.072
64823	ENSG00000050426.16	LETMD1	chr12	+	51052091	51052207	51048342	51049185	51053777	51053860	64823	76,97	16,12	69,58	1,2	216	100	2.10162739382e-05	0.0011323633313	0.687,0.789	0.97,0.931	-0.213
70526	ENSG00000203485.14	INF2	chr14	+	104715283	104715340	104714202	104714856	104718794	104719603	70526	32,27	13,12	47,46	6,0	157	100	2.11856016897e-05	0.00114001955622	0.611,0.589	0.833,1.0	-0.317
78591	ENSG00000176155.21	CCDC57	chr17	-	82134072	82134194	82128492	82128597	82151559	82151773	78591	34,24	6,8	11,5	0,0	222	100	2.15362585356e-05	0.00115740110859	0.719,0.575	1.0,1.0	-0.353
73916	ENSG00000166046.11	TCP11L2	chr12	+	106312292	106312434	106311040	106311232	106314357	106314468	73916	2,5	3,8	11,21	1,3	242	100	2.17487822606e-05	0.00116732406326	0.216,0.205	0.82,0.743	-0.571
42784	ENSG00000118482.12	PHF3	chr6	+	63678827	63679020	63646526	63646795	63679999	63680161	42784	25,9	67,60	4,5	76,77	293	100	2.21627017151e-05	0.00118801729488	0.113,0.049	0.018,0.022	0.061
27515	ENSG00000058799.15	YIPF1	chr1	-	53889243	53889463	53888906	53888986	53889712	53889780	27515	61,59	10,20	52,64	2,2	320	100	2.23275523181e-05	0.00119532350102	0.656,0.48	0.89,0.909	-0.331
79352	ENSG00000100599.16	RIN3	chr14	+	92615406	92615479	92577359	92577477	92641237	92641329	79352	35,21	6,3	39,12	0,0	173	100	2.2409439177e-05	0.00119817518665	0.771,0.802	1.0,1.0	-0.214
16827	ENSG00000092094.11	OSGEP	chr14	-	20451256	20451452	20449221	20449266	20451973	20452149	16827	84,75	111,71	34,45	129,82	296	100	2.27434714599e-05	0.0012138586265	0.204,0.263	0.082,0.156	0.114
53891	ENSG00000111412.6	SPRING1	chr12	-	116719762	116719876	116710170	116717893	116737789	116738069	53891	83,99	6,8	48,57	0,0	214	100	2.27607553279e-05	0.0012138586265	0.866,0.853	1.0,1.0	-0.141
76335	ENSG00000108352.13	RAPGEFL1	chr17	+	40181298	40181486	40177054	40177122	40181615	40181694	76335	2,0	4,5	5,2	0,1	288	100	2.27903066575e-05	0.00121388828017	0.148,0.0	1.0,0.41	-0.631
64981	ENSG00000182389.20	CACNB4	chr2	-	151869176	151869235	151856647	151860820	151870530	151870611	64981	4,6	2,7	8,10	0,1	159	100	2.29687868692e-05	0.00122184023161	0.557,0.35	1.0,0.863	-0.478
52748	ENSG00000003436.16	TFPI	chr2	-	187520541	187520613	187503647	187503770	187544503	187544637	52748	2,1	7,2	5,9	0,2	172	100	2.30868092542e-05	0.00122655998658	0.142,0.225	1.0,0.723	-0.678
17453	ENSG00000100241.22	SBF1	chr22	-	50457033	50457111	50456491	50456673	50459254	50459392	17453	67,37	10,10	48,4	1,0	178	100	2.3192434067e-05	0.00123060995211	0.79,0.675	0.964,1.0	-0.249
53114	ENSG00000167780.12	SOAT2	chr12	+	53105906	53106014	53105106	53105243	53115389	53115516	53114	19,7	30,16	18,21	6,0	208	100	2.32512785646e-05	0.00123061286613	0.233,0.174	0.591,1.0	-0.592
74651	ENSG00000136044.12	APPL2	chr12	-	105176875	105177016	105176034	105176082	105177225	105177262	74651	80,61	6,5	59,56	0,0	241	100	2.32510170521e-05	0.00123061286613	0.847,0.835	1.0,1.0	-0.159
77404	ENSG00000108639.8	SYNGR2	chr17	+	78171509	78171649	78170816	78171054	78171738	78171942	77404	402,379	133,138	221,91	37,12	240	100	2.32910651082e-05	0.00123116217267	0.557,0.534	0.713,0.76	-0.191
38364	ENSG00000022277.13	RTF2	chr20	+	56471613	56471669	56468678	56468766	56472325	56472415	38364	6,19	6,14	24,32	4,2	156	100	2.35738990212e-05	0.00124454133988	0.391,0.465	0.794,0.911	-0.424
2681	ENSG00000205726.15	ITSN1	chr21	+	33826817	33826863	33819240	33819323	33829623	33829686	2681	15,5	15,4	1,2	8,19	146	100	2.37671845816e-05	0.00125316521727	0.407,0.461	0.079,0.067	0.361
1116	ENSG00000130066.17	SAT1	chrX	+	23784293	23784403	23783799	23783883	23785327	23785429	1116	221,167	402,331	575,455	1765,1528	210	100	2.39463731395e-05	0.00125855793835	0.207,0.194	0.134,0.124	0.072
18647	ENSG00000214135.10	SDHAP4	chr3	-	197603528	197603717	197579202	197579299	197613224	197613318	18647	23,14	5,3	12,3	0,0	289	100	2.39321785329e-05	0.00125855793835	0.614,0.618	1.0,1.0	-0.384
32016	ENSG00000088298.13	EDEM2	chr20	-	35131641	35131783	35126250	35126375	35137879	35138005	32016	170,145	9,11	244,163	4,0	242	100	2.39596483188e-05	0.00125855793835	0.886,0.845	0.962,1.0	-0.116
6138	ENSG00000110713.18	NUP98	chr11	-	3686063	3686194	3683199	3683441	3691346	3691489	6138	75,68	6,0	37,15	17,3	231	100	2.40906499061e-05	0.00126385345654	0.844,1.0	0.485,0.684	0.337
22891	ENSG00000198860.14	TSEN15	chr1	+	184070615	184070732	184054727	184054863	184072156	184072298	22891	4,4	4,6	0,0	5,12	217	100	2.41289645921e-05	0.00126427922734	0.315,0.235	0.0,0.0	0.275
79279	ENSG00000105676.14	ARMC6	chr19	+	19034130	19034238	19033602	19033930	19042710	19042877	79279	14,9	20,8	8,3	1,0	208	100	2.41662827036e-05	0.00126465178173	0.252,0.351	0.794,1.0	-0.596
57866	ENSG00000148672.10	GLUD1	chr10	-	87092581	87092654	87091570	87091623	87094324	87094460	57866	4,3	3,2	2,2	0,0	173	100	2.42511011297e-05	0.00126750605343	0.435,0.464	1.0,1.0	-0.55
55086	ENSG00000167377.19	ZNF23	chr16	-	71461658	71462004	71456781	71456828	71462209	71462392	55086	31,17	3,3	21,6	0,0	446	100	2.42956095335e-05	0.00126824899392	0.699,0.56	1.0,1.0	-0.371
3514	ENSG00000118707.11	TGIF2	chr20	+	36576214	36576403	36573722	36573745	36578740	36578966	3514	8,7	16,12	1,0	16,12	289	100	2.48093354093e-05	0.00129345308457	0.147,0.168	0.021,0.0	0.147
1482	ENSG00000100243.22	CYB5R3	chr22	-	42646640	42646701	42636714	42636846	42646885	42646972	1482	8,2	13,5	0,0	10,4	161	100	2.53013963282e-05	0.0013158297606	0.277,0.199	0.0,0.0	0.238
26467	ENSG00000160094.15	ZNF362	chr1	+	33270486	33270612	33256491	33256654	33276099	33276163	26467	32,26	2,10	27,7	0,0	226	100	2.52974088628e-05	0.0013158297606	0.876,0.535	1.0,1.0	-0.294
45534	ENSG00000168958.20	MFF	chr2	+	227328677	227330846	227325264	227325427	227332418	227332588	45534	1404,1251	34,22	1270,1769	13,6	2269	100	2.53736307008e-05	0.00131794919267	0.645,0.715	0.812,0.929	-0.191
51363	ENSG00000164941.14	INTS8	chr8	+	94824892	94825067	94823286	94823561	94827262	94827353	51363	178,213	9,6	107,160	0,0	275	100	2.57690801384e-05	0.00133683090458	0.878,0.928	1.0,1.0	-0.097
61028	ENSG00000128891.17	CCDC32	chr15	-	40553594	40554127	40531330	40532302	40557215	40557372	61028	332,405	24,23	272,286	2,7	633	100	2.59014251459e-05	0.00134203361848	0.686,0.736	0.956,0.866	-0.2
60264	ENSG00000084110.11	HAL	chr12	-	95993771	95993838	95993450	95993488	95993925	95993998	60264	8,3	0,0	14,23	3,8	167	100	2.60342636789e-05	0.00134724900979	1.0,1.0	0.736,0.633	0.316
43157	ENSG00000196290.17	NIF3L1	chr2	+	200891735	200891789	200890522	200890585	200891917	200892379	43157	5,9	6,12	0,0	2,4	154	100	2.6072870814e-05	0.00134758115633	0.351,0.328	0.0,0.0	0.34
53803	ENSG00000156413.15	FUT6	chr19	-	5834949	5835077	5830407	5832579	5838676	5838760	53803	13,5	14,8	13,8	2,0	228	100	2.6331639766e-05	0.00135927755709	0.289,0.215	0.74,1.0	-0.618
28879	ENSG00000117625.14	RCOR3	chr1	+	211312354	211312487	211304010	211304140	211312719	211312819	28879	16,19	29,38	31,36	19,12	233	100	2.66537997242e-05	0.00137257587575	0.191,0.177	0.412,0.563	-0.303
43116	ENSG00000123612.16	ACVR1C	chr2	-	157556092	157556332	157550161	157550392	157587186	157587417	43116	7,4	0,0	1,0	0,4	340	100	2.66548235277e-05	0.00137257587575	1.0,1.0	1.0,0.0	0.5
14965	ENSG00000204344.16	STK19	chr6	+	31972620	31972919	31972351	31972511	31978902	31978998	14965	69,39	6,5	24,16	0,0	399	100	2.69447601225e-05	0.00138580145274	0.742,0.662	1.0,1.0	-0.298
77469	ENSG00000171302.17	CANT1	chr17	-	79000099	79000270	78997392	78997963	79009663	79009764	77469	24,17	16,18	23,14	3,1	271	100	2.7039651574e-05	0.00138897547625	0.356,0.258	0.739,0.838	-0.481
37827	ENSG00000273136.8	NBPF26	chr1	+	120807606	120807709	120805555	120805765	120808544	120808759	37827	9,14	6,11	12,31	2,1	203	100	2.70968689661e-05	0.00139020884714	0.425,0.385	0.747,0.939	-0.438
74774	ENSG00000188807.13	TMEM201	chr1	+	9611014	9611073	9610505	9610805	9611752	9611890	74774	1,0	23,7	2,3	0,2	159	100	2.728040261e-05	0.00139791194035	0.027,0.0	1.0,0.485	-0.729
15340	ENSG00000164124.11	TMEM144	chr4	+	158212060	158212220	158211452	158211574	158212607	158212698	15340	4,7	4,3	0,0	2,1	260	100	2.73477835614e-05	0.00139965153887	0.278,0.473	0.0,0.0	0.376
30991	ENSG00000101391.21	CDK5RAP1	chr20	-	33396760	33396936	33394031	33394066	33401427	33401517	30991	29,18	8,1	18,6	0,0	276	100	2.78211670631e-05	0.00142040629158	0.568,0.867	1.0,1.0	-0.282
41794	ENSG00000156931.16	VPS8	chr3	+	184922428	184922483	184920126	184920198	184924861	184924981	41794	12,13	28,24	4,0	31,24	155	100	2.78023319703e-05	0.00142040629158	0.217,0.259	0.077,0.0	0.199
62254	ENSG00000157326.19	DHRS4	chr14	+	23966282	23966417	23959901	23960003	23967210	23967266	62254	24,35	142,123	91,72	165,161	235	100	2.78588590754e-05	0.00142059821582	0.067,0.108	0.19,0.16	-0.087
19513	ENSG00000115204.15	MPV17	chr2	-	27312993	27313074	27312679	27312772	27322447	27322522	19513	112,52	9,8	93,70	2,0	181	100	2.79599930639e-05	0.00142402081462	0.873,0.782	0.963,1.0	-0.154
7267	ENSG00000131051.24	RBM39	chr20	-	35734185	35735081	35731940	35732135	35738967	35739017	7267	462,483	1961,1868	489,483	2811,3556	996	100	2.80849686889e-05	0.00142864789084	0.023,0.025	0.017,0.013	0.009
49762	ENSG00000158019.21	BABAM2	chr2	+	28310081	28310153	28298337	28298491	28338449	28338901	49762	10,11	35,22	3,0	31,31	172	100	2.84603025963e-05	0.00144598369926	0.142,0.225	0.053,0.0	0.157
32516	ENSG00000188559.16	RALGAPA2	chr20	-	20396694	20396734	20389529	20393253	20412026	20412148	32516	100,107	12,4	50,67	19,17	140	100	2.88117357928e-05	0.00146206462905	0.856,0.95	0.653,0.738	0.208
28378	ENSG00000196781.16	TLE1	chr9	-	81612291	81612393	81611842	81611956	81613376	81613521	28378	6,10	20,9	16,8	3,0	202	100	2.91296256081e-05	0.00147640650858	0.129,0.355	0.725,1.0	-0.621
54154	ENSG00000102858.13	MGRN1	chr16	+	4680031	4680097	4677462	4677572	4681549	4681580	54154	59,67	86,34	37,59	9,4	166	100	2.92069507634e-05	0.00147853566349	0.292,0.543	0.712,0.899	-0.388
56954	ENSG00000266412.6	NCOA4	chr10	-	46016539	46016694	46015125	46015266	46030525	46030623	56954	512,445	10,13	663,526	5,0	255	100	2.92971616992e-05	0.00148131120113	0.953,0.931	0.981,1.0	-0.048
1374	ENSG00000100239.16	PPP6R2	chr22	+	50436987	50437068	50436366	50436452	50437505	50437603	1374	96,92	64,61	124,125	41,29	181	100	2.94373284558e-05	0.00148660284174	0.453,0.455	0.626,0.704	-0.211
25034	ENSG00000204463.14	BAG6	chr6	-	31640384	31640528	31640198	31640306	31640644	31640704	25034	670,519	11,14	622,273	2,0	244	100	2.96124417677e-05	0.00149184702119	0.961,0.938	0.992,1.0	-0.046
57695	ENSG00000225484.7	NUTM2B-AS1	chr10	-	79808758	79808832	79806038	79806122	79814612	79814716	57695	129,171	1,7	67,205	26,16	174	100	2.96025931357e-05	0.00149184702119	0.987,0.934	0.597,0.88	0.222
75082	ENSG00000197912.16	SPG7	chr16	+	89545871	89545995	89543689	89544772	89546657	89546760	75082	0,1	105,93	4,10	70,25	224	100	2.96560677194e-05	0.00149224912869	0.0,0.005	0.025,0.152	-0.086
46459	ENSG00000183495.15	EP400	chr12	+	131963531	131963642	131960584	131961954	131979693	131979793	46459	15,7	8,13	0,1	6,7	211	100	2.97666304887e-05	0.00149601438825	0.471,0.203	0.0,0.063	0.305
18144	ENSG00000109667.12	SLC2A9	chr4	-	9996780	9996941	9985668	9985793	10018974	10019073	18144	147,135	6,7	212,129	1,0	261	100	2.98431224783e-05	0.00149806033879	0.904,0.881	0.988,1.0	-0.101
70712	ENSG00000081154.12	PCNP	chr3	+	101579789	101580004	101574179	101574279	101585436	101585511	70712	2249,1766	14,13	1734,956	37,15	315	100	3.00744211451e-05	0.0015078630434	0.981,0.977	0.937,0.953	0.034
48840	ENSG00000106077.19	ABHD11	chr7	-	73737875	73738142	73737645	73737735	73738327	73738383	48840	4,9	4,8	0,0	4,4	367	100	3.02647353017e-05	0.00151558988446	0.214,0.235	0.0,0.0	0.224
29180	ENSG00000111481.10	COPZ1	chr12	+	54342205	54342287	54340371	54340615	54345459	54345515	29180	215,144	33,18	267,218	6,16	182	100	3.03219261784e-05	0.00151663971261	0.782,0.815	0.961,0.882	-0.123
46641	ENSG00000163517.15	HDAC11	chr3	+	13501870	13501933	13483463	13483564	13502883	13502913	46641	27,39	0,0	38,54	9,3	163	100	3.04070711391e-05	0.00151908357188	1.0,1.0	0.721,0.917	0.181
78828	ENSG00000182287.15	AP1S2	chrX	-	15833443	15833524	15831289	15833007	15845378	15845516	78828	9,3	3,2	14,2	0,0	181	100	3.06340706623e-05	0.00152859996219	0.624,0.453	1.0,1.0	-0.462
72676	ENSG00000068305.18	MEF2A	chr15	+	99601940	99602109	99598429	99598511	99632977	99633173	72676	4,11	26,44	0,4	36,130	269	100	3.10084914603e-05	0.00154544106546	0.054,0.085	0.0,0.011	0.064
53913	ENSG00000123643.13	SLC36A1	chr5	+	151452342	151452491	151447626	151447813	151458787	151458935	53913	0,0	5,3	1,4	1,0	249	100	3.10492440299e-05	0.0015456321062	0.0,0.0	0.287,1.0	-0.643
38297	ENSG00000180385.10	EMC3-AS1	chr3	+	9988371	9988477	9987903	9988007	9988711	9988748	38297	0,1	7,0	2,1	0,0	206	100	3.14916290636e-05	0.00156579222179	0.0,1.0	1.0,1.0	-0.5
59461	ENSG00000205531.13	NAP1L4	chr11	-	2990908	2990992	2989128	2989197	2992228	2992259	59461	5,6	7,1	1,0	14,2	184	100	3.16811863985e-05	0.00157334859854	0.28,0.765	0.037,0.0	0.504
35833	ENSG00000163374.20	YY1AP1	chr1	-	155675009	155675096	155672271	155672731	155676547	155676746	35833	159,152	11,9	118,125	0,2	187	100	3.19345990328e-05	0.00158405448875	0.885,0.9	1.0,0.971	-0.093
49642	ENSG00000127948.16	POR	chr7	+	75946771	75947244	75915163	75915179	75953988	75954180	49642	11,16	139,295	14,8	22,57	573	100	3.20087087445e-05	0.00158585158768	0.014,0.009	0.1,0.024	-0.051
822	ENSG00000158571.11	PFKFB1	chrX	-	54960823	54960917	54959826	54959893	54963256	54963382	822	9,14	3,3	9,7	0,0	194	100	3.22568815961e-05	0.00159061760662	0.607,0.706	1.0,1.0	-0.344
5104	ENSG00000167578.18	RAB4B	chr19	+	40783777	40783840	40780018	40780499	40783920	40783973	5104	4,7	3,2	8,3	0,0	163	100	3.22160427529e-05	0.00159061760662	0.45,0.682	1.0,1.0	-0.434
46072	ENSG00000117523.18	PRRC2C	chr1	+	171591151	171591204	171589368	171589605	171591586	171593258	46072	53,52	10,6	44,70	0,2	153	100	3.21544673327e-05	0.00159061760662	0.776,0.85	1.0,0.958	-0.166
62114	ENSG00000137500.10	CCDC90B	chr11	-	83285126	83285211	83280140	83280260	83285552	83286351	62114	8,24	65,107	1,0	18,41	185	100	3.22332056264e-05	0.00159061760662	0.062,0.108	0.029,0.0	0.07
42603	ENSG00000213047.13	DENND1B	chr1	-	197647054	197647114	197645689	197645743	197652234	197652315	42603	5,5	10,3	0,0	2,3	160	100	3.26470047767e-05	0.00160796100585	0.238,0.51	0.0,0.0	0.374
33251	ENSG00000169919.17	GUSB	chr7	-	65974918	65975071	65974525	65974704	65976014	65976202	33251	99,66	55,46	116,87	27,4	253	100	3.29994534168e-05	0.00162150483251	0.416,0.362	0.629,0.896	-0.373
74179	ENSG00000162769.13	FLVCR1	chr1	+	212887890	212888001	212885292	212885396	212888488	212888594	74179	85,117	4,9	41,97	0,0	211	100	3.29848709996e-05	0.00162150483251	0.91,0.86	1.0,1.0	-0.115
16312	ENSG00000137409.21	MTCH1	chr6	-	36969300	36969515	36968157	36968974	36970038	36970114	16312	146,152	656,639	86,18	508,315	315	100	3.31308804347e-05	0.00162605429003	0.066,0.07	0.051,0.018	0.034
61546	ENSG00000172663.9	TMEM134	chr11	-	67465055	67465267	67464802	67464856	67467311	67467388	61546	29,20	5,2	23,6	0,0	312	100	3.32419169463e-05	0.00162959350463	0.65,0.762	1.0,1.0	-0.294
26661	ENSG00000118298.12	CA14	chr1	+	150263793	150263878	150263658	150263679	150264592	150265049	26661	10,30	10,2	12,16	0,0	185	100	3.34530645784e-05	0.0016380263726	0.351,0.89	1.0,1.0	-0.379
20618	ENSG00000142327.13	RNPEPL1	chr2	+	240573774	240573891	240573109	240573261	240574112	240574348	20618	59,18	6,1	15,5	11,3	217	100	3.35726117423e-05	0.00164195956845	0.819,0.892	0.386,0.434	0.445
8961	ENSG00000152818.19	UTRN	chr6	+	144827347	144827386	144820881	144821018	144827610	144827676	8961	285,280	14,6	217,462	17,53	139	100	3.36610509488e-05	0.00164436394162	0.936,0.971	0.902,0.862	0.072
73952	ENSG00000118690.13	ARMC2	chr6	+	108858198	108858271	108854224	108854485	108868823	108868995	73952	11,11	0,0	6,1	1,4	173	100	3.37615927982e-05	0.001647353243	1.0,1.0	0.776,0.126	0.549
18083	ENSG00000157869.16	RAB28	chr4	-	13460698	13460828	13381490	13381594	13474317	13474322	18083	91,84	3,13	73,70	1,0	230	100	3.38070384596e-05	0.00164765036683	0.93,0.737	0.969,1.0	-0.151
34393	ENSG00000176623.12	RMDN1	chr8	-	86494828	86494966	86488551	86488639	86506994	86507112	34393	5,8	174,162	12,23	116,121	238	100	3.38981550169e-05	0.00165017006951	0.012,0.02	0.042,0.074	-0.042
38839	ENSG00000204311.15	PJVK	chr2	+	178458509	178458627	178456009	178456151	178460981	178461215	38839	3,4	0,0	0,2	2,1	218	100	3.40596174065e-05	0.00165610439341	1.0,1.0	0.0,0.478	0.761
72068	ENSG00000115657.14	ABCB6	chr2	-	219217669	219217807	219216363	219216465	219218124	219218190	72068	112,76	8,4	106,29	0,0	238	100	3.42143067839e-05	0.00166169600175	0.855,0.889	1.0,1.0	-0.128
11600	ENSG00000113240.14	CLK4	chr5	-	178619837	178620673	178618555	178618778	178622392	178622459	11600	41,27	1,4	11,21	0,0	936	100	3.44364001573e-05	0.00167054448735	0.814,0.419	1.0,1.0	-0.384
11035	ENSG00000124789.12	NUP153	chr6	-	17668974	17669028	17665238	17665385	17669292	17669337	11035	423,348	39,28	290,372	10,10	154	100	3.44827901335e-05	0.00167085880664	0.876,0.89	0.95,0.96	-0.072
61924	ENSG00000111450.14	STX2	chr12	-	130795994	130796120	130789599	130791977	130798524	130798635	61924	55,49	19,22	26,47	23,68	226	100	3.46403707923e-05	0.00167655389968	0.562,0.496	0.333,0.234	0.245
39453	ENSG00000179818.17	PCBP1-AS1	chr2	-	70053730	70053792	70051044	70051305	70059642	70059680	39453	6,7	2,5	11,24	1,0	162	100	3.47207094873e-05	0.0016785017352	0.649,0.464	0.872,1.0	-0.379
12501	ENSG00000131503.21	ANKHD1	chr5	+	140496519	140497278	140486957	140487060	140504820	140504966	12501	784,663	20,10	446,591	4,0	859	100	3.47773568824e-05	0.00167930109098	0.82,0.885	0.928,1.0	-0.111
5950	ENSG00000100342.22	APOL1	chr22	+	36257082	36257136	36254897	36254999	36257318	36257407	5950	502,263	25,13	541,241	4,6	154	100	3.48718567582e-05	0.00168182661054	0.929,0.929	0.989,0.963	-0.047
27544	ENSG00000119787.14	ATL2	chr2	-	38343267	38343512	38318834	38319019	38377142	38377256	27544	321,292	0,0	327,433	8,8	345	100	3.49100041696e-05	0.00168182661054	1.0,1.0	0.922,0.94	0.069
19516	ENSG00000115204.15	MPV17	chr2	-	27312993	27313154	27312679	27312772	27322447	27322522	19516	114,58	9,8	97,70	2,0	261	100	3.49821278338e-05	0.00168336411697	0.829,0.735	0.949,1.0	-0.192
69892	ENSG00000063761.16	ADCK1	chr14	+	77900558	77900674	77899099	77899258	77907802	77907919	69892	0,2	23,20	8,10	27,16	216	100	3.50856231123e-05	0.00168640598346	0.0,0.044	0.121,0.224	-0.15
15931	ENSG00000245958.8	SEPTIN7P14	chr4	+	119543752	119543845	119528739	119528789	119550378	119550443	15931	36,32	5,8	5,17	0,0	193	100	3.52769136264e-05	0.00169245377684	0.789,0.675	1.0,1.0	-0.268
24831	ENSG00000119688.21	ABCD4	chr14	-	74299547	74299675	74297835	74298069	74302874	74302910	24831	23,28	6,3	6,11	0,0	228	100	3.52923001835e-05	0.00169245377684	0.627,0.804	1.0,1.0	-0.284
65583	ENSG00000126777.18	KTN1	chr14	+	55673171	55673255	55672928	55673012	55675834	55675918	65583	417,268	216,151	367,353	354,312	184	100	3.53414601219e-05	0.00169287211442	0.512,0.491	0.36,0.381	0.131
22189	ENSG00000196233.14	LCOR	chr10	+	96858291	96858416	96833405	96833479	96907264	96907330	22189	11,3	9,2	2,1	6,22	225	100	3.57229682447e-05	0.00170723980087	0.352,0.4	0.129,0.02	0.301
62905	ENSG00000048028.12	USP28	chr11	-	113807950	113808136	113804867	113805046	113808297	113808437	62905	11,13	93,48	2,0	68,41	286	100	3.57107465806e-05	0.00170723980087	0.04,0.087	0.01,0.0	0.059
9577	ENSG00000087884.16	AAMDC	chr11	+	77841018	77841060	77821128	77821241	77842478	77842628	9577	32,35	30,39	21,6	65,24	142	100	3.5894789758e-05	0.00171349529443	0.429,0.387	0.185,0.15	0.241
46533	ENSG00000151640.13	DPYSL4	chr10	+	132202645	132202825	132201945	132202116	132203761	132203927	46533	20,13	2,4	6,5	0,0	280	100	3.63391643972e-05	0.00173273248006	0.781,0.537	1.0,1.0	-0.341
12746	ENSG00000147121.16	KRBOX4	chrX	+	46462747	46462874	46450430	46450475	46463197	46463293	12746	107,115	0,0	63,37	6,2	227	100	3.64922600896e-05	0.00173607780529	1.0,1.0	0.822,0.891	0.143
55153	ENSG00000136828.19	RALGPS1	chr9	+	127050042	127050132	127034430	127034514	127052846	127052939	55153	10,21	5,2	13,15	0,0	190	100	3.64847253451e-05	0.00173607780529	0.513,0.847	1.0,1.0	-0.32
3210	ENSG00000235621.10	LINC00494	chr20	+	48364997	48365197	48359921	48360150	48366473	48367162	3210	22,26	5,2	7,6	0,0	300	100	3.66150454901e-05	0.0017399419744	0.595,0.813	1.0,1.0	-0.296
1548	ENSG00000100393.14	EP300	chr22	+	41146738	41146816	41141047	41141222	41147836	41147946	1548	326,352	9,18	148,154	0,1	178	100	3.68608121299e-05	0.00174963480705	0.953,0.917	1.0,0.989	-0.059
40299	ENSG00000174672.16	BRSK2	chr11	+	1456954	1457049	1456597	1456687	1459191	1459239	40299	32,15	3,6	20,3	0,0	195	100	3.69539413806e-05	0.00175206880623	0.845,0.562	1.0,1.0	-0.296
5000	ENSG00000124459.12	ZNF45	chr19	-	43931246	43931365	43925324	43925458	43932603	43932690	5000	2,1	0,0	2,0	2,1	219	100	3.71135125902e-05	0.00175581833715	1.0,1.0	0.313,0.0	0.844
19065	ENSG00000138075.14	ABCG5	chr2	-	43826381	43826521	43824218	43824432	43827982	43828115	19065	48,61	0,1	26,12	3,4	240	100	3.71169050133e-05	0.00175581833715	1.0,0.962	0.783,0.556	0.311
32772	ENSG00000185379.21	RAD51D	chr17	-	35107365	35107447	35106127	35106481	35119110	35119172	32772	10,10	2,4	8,1	0,0	182	100	3.77020934608e-05	0.00178148774575	0.733,0.579	1.0,1.0	-0.344
71829	ENSG00000175061.20	SNHG29	chr17	+	16439527	16439703	16439062	16439414	16440184	16440253	71829	2376,1724	887,741	2066,1419	586,316	276	100	3.77713045803e-05	0.0017827459597	0.493,0.457	0.561,0.619	-0.115
7709	ENSG00000228409.8	CCT6P1	chr7	+	65759174	65759271	65756468	65756574	65759859	65759998	7709	27,31	0,0	10,16	2,4	197	100	3.79289654667e-05	0.001788171328	1.0,1.0	0.717,0.67	0.306
77731	ENSG00000101605.14	MYOM1	chr18	-	3129231	3129519	3126700	3126897	3131374	3131496	77731	14,19	0,0	13,16	1,4	388	100	3.82350097943e-05	0.00180057219914	1.0,1.0	0.77,0.508	0.361
30534	ENSG00000116604.19	MEF2D	chr1	-	156467992	156468299	156463726	156467656	156468779	156469020	30534	84,85	4,8	48,22	0,0	407	100	3.83759084408e-05	0.00180517686166	0.838,0.723	1.0,1.0	-0.22
54407	ENSG00000104408.11	EIF3E	chr8	-	108242111	108242346	108241798	108241913	108248612	108248716	54407	6,31	401,545	20,26	185,236	335	100	3.86203489643e-05	0.00181463626194	0.004,0.017	0.031,0.032	-0.021
38442	ENSG00000071054.17	MAP4K4	chr2	+	101858995	101859082	101855976	101856138	101859642	101859864	38442	1530,1370	66,55	1163,1043	26,15	187	100	3.87767476823e-05	0.00181994231134	0.925,0.93	0.96,0.974	-0.039
24769	ENSG00000139178.12	C1RL	chr12	-	7099900	7100026	7099685	7099760	7101897	7102087	24769	139,151	5,16	48,35	0,0	226	100	3.88299574066e-05	0.00182039884303	0.925,0.807	1.0,1.0	-0.134
5921	ENSG00000120899.18	PTK2B	chr8	+	27323266	27323426	27322401	27322499	27325563	27325681	5921	16,15	14,8	5,14	1,0	260	100	3.89522525716e-05	0.00182408954576	0.305,0.419	0.658,1.0	-0.467
2658	ENSG00000159216.19	RUNX1	chr21	-	34834409	34834601	34799300	34799462	34859473	34859578	2658	242,316	21,24	89,114	2,1	292	100	3.90968381618e-05	0.00182881466999	0.798,0.818	0.938,0.975	-0.148
17281	ENSG00000129103.19	SUMF2	chr7	+	56074585	56074639	56074173	56074218	56076833	56076889	17281	38,18	4,7	48,24	1,0	154	100	3.92481987974e-05	0.00183384580653	0.861,0.625	0.969,1.0	-0.241
4963	ENSG00000142273.13	CBLC	chr19	+	44782369	44782491	44781206	44781363	44784263	44784401	4963	10,10	3,3	10,1	0,0	222	100	3.94296576879e-05	0.0018382211794	0.6,0.6	1.0,1.0	-0.4
78083	ENSG00000151445.16	VIPAS39	chr14	-	77457094	77457413	77454009	77454102	77457494	77457572	78083	19,10	45,26	1,1	35,4	419	100	3.94140872527e-05	0.0018382211794	0.092,0.084	0.007,0.056	0.056
30202	ENSG00000169231.13	THBS3	chr1	-	155200450	155200610	155199994	155200113	155200896	155201004	30202	20,19	4,2	16,17	0,0	260	100	3.97334600036e-05	0.00184947160362	0.658,0.785	1.0,1.0	-0.278
35621	ENSG00000225210.10	DUXAP9	chr14	+	19115191	19115270	19068076	19068214	19130635	19131167	35621	12,19	5,2	11,16	0,0	179	100	3.97593322169e-05	0.00184947160362	0.573,0.841	1.0,1.0	-0.293
51751	ENSG00000074621.14	SLC24A1	chr15	+	65651669	65651759	65650381	65650942	65652641	65652808	51751	10,4	2,3	8,7	0,0	190	100	3.98447359273e-05	0.00185138720266	0.725,0.412	1.0,1.0	-0.431
43178	ENSG00000123636.19	BAZ2B	chr2	-	159427940	159428042	159412334	159412545	159428310	159428419	43178	42,42	12,12	66,63	5,2	202	100	4.01309800689e-05	0.00186262026672	0.634,0.634	0.867,0.94	-0.269
77583	ENSG00000178927.19	CYBC1	chr17	-	82447579	82447646	82446622	82446696	82449169	82449292	77583	92,41	14,2	75,78	2,0	167	100	4.04321213407e-05	0.00187451911398	0.797,0.925	0.957,1.0	-0.117
74930	ENSG00000103194.16	USP10	chr16	+	84740308	84740369	84733137	84733503	84744632	84744780	74930	859,798	1,2	595,599	7,18	161	100	4.08230937877e-05	0.0018884627861	0.998,0.996	0.981,0.954	0.029
76881	ENSG00000124422.12	USP22	chr17	-	21028541	21028674	21021112	21021226	21042664	21043011	76881	359,349	19,26	157,195	4,1	233	100	4.08038017896e-05	0.0018884627861	0.89,0.852	0.944,0.988	-0.095
4301	ENSG00000197128.13	ZNF772	chr19	-	57475659	57475786	57469585	57474421	57476633	57476672	4301	8,7	1,4	14,5	0,0	227	100	4.10701879148e-05	0.0018973132186	0.779,0.435	1.0,1.0	-0.393
32187	ENSG00000183889.12	ENSG00000183889	chr16	+	16318550	16318734	16317895	16318079	16318922	16319038	32187	17,5	3,2	2,1	0,0	284	100	4.11050540851e-05	0.0018973132186	0.666,0.468	1.0,1.0	-0.433
3317	ENSG00000229005.2	HNF4A-AS1	chr20	-	44392008	44392110	44372745	44373009	44395452	44395706	3317	4,6	8,5	0,0	7,1	202	100	4.12503272055e-05	0.0018977417016	0.198,0.373	0.0,0.0	0.285
11262	ENSG00000105997.23	HOXA3	chr7	-	27126885	27127070	27122558	27122642	27140082	27140186	11262	2,0	2,2	5,3	0,1	285	100	4.11606549291e-05	0.0018977417016	0.26,0.0	1.0,0.513	-0.626
27320	ENSG00000119801.13	YPEL5	chr2	+	30148244	30148541	30146940	30147062	30156627	30156792	27320	168,175	111,121	98,57	137,72	397	100	4.12256485176e-05	0.0018977417016	0.276,0.267	0.153,0.166	0.112
73317	ENSG00000166669.14	ATF7IP2	chr16	+	10457371	10457529	10440363	10440462	10473478	10473534	73317	15,8	1,5	11,9	0,0	258	100	4.17986825234e-05	0.00192085822595	0.853,0.383	1.0,1.0	-0.382
65853	ENSG00000186470.14	BTN3A2	chr6	+	26372896	26373097	26370321	26370603	26373275	26373296	65853	187,196	7,7	122,127	0,0	301	100	4.22327955308e-05	0.001938679808	0.899,0.903	1.0,1.0	-0.099
28407	ENSG00000055070.17	SZRD1	chr1	+	16391374	16391424	16367087	16367308	16393227	16393385	28407	169,99	156,106	132,64	65,27	150	100	4.23292828592e-05	0.00194098075236	0.419,0.384	0.575,0.612	-0.192
31395	ENSG00000112715.26	VEGFA	chr6	+	43780731	43780803	43778888	43778918	43781955	43782087	31395	79,60	159,158	85,119	108,123	172	100	4.25752253805e-05	0.00194965936608	0.224,0.181	0.314,0.36	-0.134
38032	ENSG00000103121.9	CMC2	chr16	-	80997313	80997429	80981805	80981877	81006733	81006854	38032	295,275	1,1	355,509	21,4	216	100	4.2611688044e-05	0.00194965936608	0.993,0.992	0.887,0.983	0.057
69678	ENSG00000119707.14	RBM25	chr14	+	73100300	73100362	73099666	73099750	73103191	73103478	69678	47,59	616,702	41,125	459,506	162	100	4.27765224317e-05	0.00195506453232	0.045,0.049	0.052,0.132	-0.045
21330	ENSG00000223959.10	AFG3L1P	chr16	+	89978809	89978878	89977604	89977802	89980241	89980336	21330	83,150	9,10	75,53	1,0	169	100	4.33953988839e-05	0.00197902873015	0.845,0.899	0.978,1.0	-0.117
42773	ENSG00000189190.11	ZNF600	chr19	-	52781316	52781464	52778825	52778907	52786594	52786742	42773	18,12	3,3	9,1	0,0	248	100	4.33530326096e-05	0.00197902873015	0.708,0.617	1.0,1.0	-0.338
51676	ENSG00000141380.14	SS18	chr18	-	26080304	26080423	26078075	26078160	26082362	26082528	51676	1,0	2,16	4,11	1,13	219	100	4.35964719112e-05	0.00198603514316	0.186,0.0	0.646,0.279	-0.37
4739	ENSG00000286024.3	ENSG00000286024	chr19	+	48807968	48808099	48807320	48807399	48810343	48810837	4739	25,15	6,1	31,7	0,0	231	100	4.36508271847e-05	0.00198634986966	0.643,0.867	1.0,1.0	-0.245
21062	ENSG00000132199.20	ENOSF1	chr18	-	677344	677444	675320	675402	683245	683380	21062	21,13	11,13	29,15	2,2	200	100	4.38058605655e-05	0.00198721027775	0.488,0.333	0.879,0.789	-0.424
64215	ENSG00000119522.18	DENND1A	chr9	-	123450692	123450749	123440359	123440491	123452275	123452347	64215	212,157	4,14	122,95	0,0	157	100	4.37653934615e-05	0.00198721027775	0.971,0.877	1.0,1.0	-0.076
67003	ENSG00000159147.18	DONSON	chr21	-	33582164	33582246	33581950	33582055	33584589	33584768	67003	214,204	5,8	145,137	12,22	182	100	4.38121363039e-05	0.00198721027775	0.959,0.933	0.869,0.774	0.124
1134	ENSG00000184368.16	MAP7D2	chrX	-	20050823	20050946	20044363	20044524	20052877	20052988	1134	13,13	2,2	2,3	6,4	223	100	4.39050036718e-05	0.00198926729299	0.745,0.745	0.13,0.252	0.554
32472	ENSG00000176720.6	BOK	chr2	+	241570124	241570288	241562347	241562476	241572296	241574131	32472	79,31	6,3	81,28	0,0	264	100	4.41129145448e-05	0.00199652666748	0.833,0.797	1.0,1.0	-0.185
15765	ENSG00000163319.11	MRPS18C	chr4	+	83458345	83458429	83456908	83456958	83459739	83459797	15765	217,169	97,77	357,244	61,66	184	100	4.41723726872e-05	0.00199705872846	0.549,0.544	0.761,0.668	-0.168
22309	ENSG00000230606.11	LINC02969	chr2	-	97423788	97423918	97423176	97423272	97429216	97429862	22309	15,8	1,7	4,1	0,0	230	100	4.44120358831e-05	0.00200572802831	0.867,0.332	1.0,1.0	-0.4
66611	ENSG00000111445.14	RFC5	chr12	+	118017689	118017852	118016728	118016892	118017994	118018053	66611	15,12	4,3	2,3	0,0	263	100	4.44975934428e-05	0.00200742645418	0.588,0.603	1.0,1.0	-0.405
53095	ENSG00000111731.13	C2CD5	chr12	-	22458483	22458555	22456970	22457161	22459491	22459542	53095	12,13	2,4	14,8	0,0	172	100	4.46772041974e-05	0.00201335969185	0.777,0.654	1.0,1.0	-0.284
54926	ENSG00000136861.19	CDK5RAP2	chr9	-	120529977	120530140	120528743	120528797	120536371	120536437	54926	455,262	9,8	433,301	1,0	263	100	4.4827789735e-05	0.00201797356694	0.951,0.926	0.994,1.0	-0.058
2399	ENSG00000182871.16	COL18A1	chr21	+	45489485	45489521	45488417	45488444	45490274	45490346	2399	1101,513	25,16	476,76	0,0	136	100	4.49205618372e-05	0.00201997778874	0.97,0.959	1.0,1.0	-0.036
3208	ENSG00000235621.10	LINC00494	chr20	+	48364888	48365197	48359883	48360150	48366473	48366633	3208	32,38	5,2	9,8	0,0	409	100	4.5086941323e-05	0.00202094732172	0.61,0.823	1.0,1.0	-0.284
18077	ENSG00000163631.17	ALB	chr4	+	73420792	73420948	73420253	73420321	73421091	73421219	18077	153,202	5288,3907	196,561	4767,6163	256	100	4.50799884482e-05	0.00202094732172	0.011,0.02	0.016,0.034	-0.01
22910	ENSG00000106686.17	SPATA6L	chr9	-	4626425	4626555	4625216	4625566	4629090	4629168	22910	6,4	2,6	3,16	0,1	230	100	4.50654404524e-05	0.00202094732172	0.566,0.225	1.0,0.874	-0.542
5174	ENSG00000105221.18	AKT2	chr19	-	40269422	40269540	40265221	40265351	40270497	40270769	5174	4,13	3,2	6,8	0,0	218	100	4.53060514294e-05	0.00202859662363	0.38,0.749	1.0,1.0	-0.435
10962	ENSG00000164346.10	NSA2	chr5	+	74773867	74774060	74770630	74770810	74776603	74780113	10962	667,634	1,8	367,400	16,8	293	100	4.59550475029e-05	0.0020423652481	0.996,0.964	0.887,0.945	0.064
36444	ENSG00000118495.21	PLAGL1	chr6	-	143965107	143965313	143964786	143964818	143966157	143966198	36444	2,1	7,10	3,3	0,1	306	100	4.5950833475e-05	0.0020423652481	0.085,0.032	1.0,0.495	-0.689
41323	ENSG00000106384.12	MOGAT3	chr7	-	101198190	101198365	101195896	101196389	101198625	101198830	41323	39,58	3,17	14,4	0,0	275	100	4.58847024307e-05	0.0020423652481	0.825,0.554	1.0,1.0	-0.31
42951	ENSG00000164542.13	KIAA0895	chr7	-	36336153	36336297	36335045	36335178	36367110	36367171	42951	11,1	0,0	5,2	2,2	244	100	4.57408882606e-05	0.0020423652481	1.0,1.0	0.506,0.291	0.602
53899	ENSG00000231527.7	FAM27C	chr9	+	61920302	61920435	61917467	61917607	61972189	61974053	53899	0,1	5,0	4,4	0,0	233	100	4.57440138016e-05	0.0020423652481	0.0,1.0	1.0,1.0	-0.5
56533	ENSG00000148737.17	TCF7L2	chr10	+	113089396	113089540	113040024	113040126	113141183	113141316	56533	37,54	259,434	26,45	103,126	244	100	4.5934108736e-05	0.0020423652481	0.055,0.049	0.094,0.128	-0.059
75066	ENSG00000197912.16	SPG7	chr16	+	89529134	89529524	89526328	89526468	89530682	89530808	75066	18,20	3,0	4,4	5,7	490	100	4.58954771462e-05	0.0020423652481	0.55,1.0	0.14,0.104	0.653
43192	ENSG00000136536.15	MARCHF7	chr2	+	159714556	159714598	159712505	159712606	159729008	159729175	43192	5,3	6,9	0,0	8,4	142	100	4.6066416156e-05	0.00204514370347	0.37,0.19	0.0,0.0	0.28
12628	ENSG00000158806.14	NPM2	chr8	+	22036357	22036526	22034509	22034544	22036637	22036896	12628	11,20	6,1	20,16	0,0	269	100	4.6390899657e-05	0.00205301798535	0.405,0.881	1.0,1.0	-0.357
13982	ENSG00000173262.12	SLC2A14	chr12	-	7863368	7863457	7832721	7832814	7869862	7869937	13982	12,2	8,10	0,0	5,7	189	100	4.63681877335e-05	0.00205301798535	0.442,0.096	0.0,0.0	0.269
72502	ENSG00000140525.20	FANCI	chr15	+	89294914	89295094	89293832	89293997	89299799	89299966	72502	251,194	6,11	261,291	0,3	280	100	4.63768904494e-05	0.00205301798535	0.937,0.863	1.0,0.972	-0.086
11656	ENSG00000146067.17	FAM193B	chr5	-	177553167	177553350	177538910	177539147	177554248	177554347	11656	22,19	4,2	17,3	0,0	283	100	4.6708299289e-05	0.00206488167871	0.66,0.77	1.0,1.0	-0.285
22991	ENSG00000197712.12	FAM114A1	chr4	+	38878070	38878426	38867676	38867834	38891742	38891795	22991	194,139	2,9	173,138	0,0	456	100	4.67862313485e-05	0.00206614512174	0.955,0.772	1.0,1.0	-0.137
64449	ENSG00000119509.13	INVS	chr9	+	100214924	100215040	100126382	100126549	100215400	100215488	64449	8,11	5,1	3,1	0,0	216	100	4.69560152252e-05	0.00207145793193	0.426,0.836	1.0,1.0	-0.369
31249	ENSG00000140374.17	ETFA	chr15	-	76295590	76295737	76292618	76292700	76311349	76311402	31249	982,808	96,46	1047,928	49,26	247	100	4.71643849634e-05	0.00207845997526	0.805,0.877	0.896,0.935	-0.075
3209	ENSG00000235621.10	LINC00494	chr20	+	48364893	48365197	48359916	48360150	48366473	48366745	3209	32,38	5,2	9,8	0,0	404	100	4.74569108857e-05	0.00208702023646	0.613,0.825	1.0,1.0	-0.281
57903	ENSG00000197563.11	PIGN	chr18	-	62140419	62140479	62138982	62139075	62143305	62143346	57903	33,9	1,0	20,0	6,2	160	100	4.74583366801e-05	0.00208702023646	0.954,1.0	0.676,0.0	0.639
13505	ENSG00000039319.17	ZFYVE16	chr5	+	80443793	80443920	80443151	80443284	80445262	80445405	13505	3,10	26,20	0,0	18,23	227	100	4.75163334603e-05	0.00208737806959	0.048,0.181	0.0,0.0	0.114
20031	ENSG00000171466.10	ZNF562	chr19	-	9656546	9656653	9641806	9653881	9658008	9658135	20031	60,56	16,9	102,120	2,8	207	100	4.80584693463e-05	0.00210726082013	0.644,0.75	0.961,0.879	-0.223
52254	ENSG00000249859.14	PVT1	chr8	+	128095691	128095817	128010317	128010444	128096517	128096654	52254	3,4	1,5	0,0	8,2	226	100	4.80696066697e-05	0.00210726082013	0.57,0.261	0.0,0.0	0.415
6276	ENSG00000088727.14	KIF9	chr3	-	47282139	47282385	47277281	47277379	47282494	47282577	6276	8,10	14,8	8,1	51,26	346	100	4.82049345502e-05	0.00211098282944	0.142,0.265	0.043,0.011	0.177
70489	ENSG00000156411.10	ATP5MJ	chr14	-	103914478	103914633	103913256	103913984	103921469	103921520	70489	3,5	4,0	0,0	2,5	255	100	4.83860636313e-05	0.00211670068331	0.227,1.0	0.0,0.0	0.614
45177	ENSG00000241288.8	LINC02614	chr3	-	125908781	125908874	125908436	125908560	125910219	125910323	45177	4,6	2,3	1,4	0,0	193	100	4.86863489143e-05	0.00212761377588	0.509,0.509	1.0,1.0	-0.491
50433	ENSG00000023734.11	STRAP	chr12	+	15883540	15883676	15882386	15882819	15889927	15890009	50433	1102,1988	14,19	669,1918	15,56	236	100	4.90411836984e-05	0.00213831609388	0.971,0.978	0.95,0.936	0.031
54276	ENSG00000090054.16	SPTLC1	chr9	-	92079433	92079566	92067965	92068098	92080015	92080088	54276	43,31	412,384	71,66	343,370	233	100	4.90088052759e-05	0.00213831609388	0.043,0.033	0.082,0.071	-0.038
67908	ENSG00000140995.17	DEF8	chr16	+	89949416	89949513	89948730	89948814	89955168	89955266	67908	15,12	4,2	16,13	0,0	197	100	4.90844802632e-05	0.00213831609388	0.656,0.753	1.0,1.0	-0.295
59673	ENSG00000101040.20	ZMYND8	chr20	-	47212641	47212725	47209213	47210897	47221313	47221474	59673	252,334	11,14	113,212	23,21	184	100	4.92229218297e-05	0.0021421181106	0.926,0.928	0.728,0.846	0.14
7491	ENSG00000005486.17	RHBDD2	chr7	+	75881364	75881486	75878998	75879260	75881828	75882124	7491	95,72	28,32	50,31	1,4	222	100	4.93204115216e-05	0.00214413190898	0.604,0.503	0.957,0.777	-0.314
21725	ENSG00000078898.7	BPIFB2	chr20	+	33021280	33021344	33020541	33020587	33021722	33021799	21725	718,594	31,41	620,401	21,0	164	100	4.94343145137e-05	0.00214685433311	0.934,0.898	0.947,1.0	-0.057
16919	ENSG00000197694.18	SPTAN1	chr9	+	128627924	128627942	128627385	128627498	128630320	128630375	16919	515,401	8,28	306,92	2,0	118	100	4.95385616793e-05	0.00214915221213	0.982,0.924	0.992,1.0	-0.043
4818	ENSG00000063169.12	BICRA	chr19	+	47681975	47682152	47678961	47681276	47694114	47694726	4818	29,38	15,9	2,4	0,0	277	100	4.99292783244e-05	0.00216019905438	0.411,0.604	1.0,1.0	-0.493
60409	ENSG00000224043.9	CCNT2-AS1	chr2	-	134877519	134877643	134868943	134869041	134918562	134918710	60409	8,9	11,21	12,12	3,3	224	100	4.99995911547e-05	0.00216019905438	0.245,0.161	0.641,0.641	-0.438
66917	ENSG00000081760.17	AACS	chr12	+	125124901	125125024	125119857	125124769	125128160	125128274	66917	63,42	6,5	43,10	0,0	223	100	4.99812340768e-05	0.00216019905438	0.825,0.79	1.0,1.0	-0.193
69176	ENSG00000011258.16	MBTD1	chr17	-	51259142	51259206	51225007	51225209	51259834	51259941	69176	40,39	1,5	14,12	7,8	164	100	4.99742268233e-05	0.00216019905438	0.961,0.826	0.549,0.478	0.38
16814	ENSG00000145287.11	PLAC8	chr4	-	83107803	83107950	83104895	83105020	83114665	83114715	16814	55,55	5,3	94,116	0,0	247	100	5.00593168591e-05	0.00216054979413	0.817,0.881	1.0,1.0	-0.151
61888	ENSG00000166435.16	XRRA1	chr11	-	74927390	74927488	74921213	74921347	74930299	74930372	61888	9,9	3,3	5,1	0,0	198	100	5.03184152223e-05	0.00216949583242	0.602,0.602	1.0,1.0	-0.398
68169	ENSG00000213918.11	DNASE1	chr16	+	3655848	3655966	3655372	3655520	3656101	3656185	68169	7,2	29,14	14,8	0,5	218	100	5.06844313897e-05	0.00218302851865	0.1,0.062	1.0,0.423	-0.631
17504	ENSG00000163071.11	SPATA18	chr4	+	52069820	52069916	52060781	52060897	52071916	52072013	17504	30,33	4,10	17,16	24,14	196	100	5.08499869744e-05	0.00218790822681	0.793,0.627	0.265,0.368	0.393
59016	ENSG00000188690.15	UROS	chr10	-	125789282	125789363	125788585	125789005	125794879	125794978	59016	3,2	39,24	10,9	16,19	181	100	5.09228795542e-05	0.00218879502314	0.041,0.044	0.257,0.207	-0.19
26966	ENSG00000118518.17	RNF146	chr6	+	127285207	127285348	127282286	127282395	127286049	127286097	26966	18,13	3,3	22,26	0,0	241	100	5.1266383793e-05	0.00220129964871	0.713,0.643	1.0,1.0	-0.322
26044	ENSG00000115504.15	EHBP1	chr2	+	62987930	62988038	62979187	62979335	62990715	62990840	26044	615,546	90,80	518,692	134,182	208	100	5.13590708615e-05	0.00220301998116	0.767,0.766	0.65,0.646	0.118
29441	ENSG00000214078.13	CPNE1	chr20	-	35632162	35632234	35631944	35632025	35632310	35632385	29441	655,433	13,10	661,378	0,0	172	100	5.14738904537e-05	0.00220568518305	0.967,0.962	1.0,1.0	-0.036
33379	ENSG00000155329.12	ZCCHC10	chr5	-	133022840	133022906	133006758	133006920	133026496	133026549	33379	36,29	29,25	25,28	48,80	166	100	5.15379848327e-05	0.00220617355319	0.428,0.411	0.239,0.174	0.213
34889	ENSG00000169507.10	SLC38A11	chr2	-	164915111	164915273	164911635	164911748	164915902	164915973	34889	38,21	0,1	21,35	2,10	262	100	5.17467845803e-05	0.00221284896471	1.0,0.889	0.8,0.572	0.259
25912	ENSG00000157110.16	RBPMS	chr8	+	30566256	30566360	30558180	30558956	30570636	30570700	25912	17,11	2,4	16,6	0,0	204	100	5.23691484299e-05	0.00223717795818	0.806,0.574	1.0,1.0	-0.31
32961	ENSG00000089248.7	ERP29	chr12	+	112019755	112019894	112013425	112013609	112022149	112023168	32961	1212,939	18,18	1014,484	0,5	239	100	5.27471053752e-05	0.00224438717308	0.966,0.956	1.0,0.976	-0.027
38852	ENSG00000172667.11	ZMAT3	chr3	-	179071326	179071447	179067482	179067809	179071594	179072215	38852	46,57	6,13	2,5	2,9	221	100	5.270587527e-05	0.00224438717308	0.776,0.665	0.312,0.201	0.464
40658	ENSG00000168591.16	TMUB2	chr17	+	44189423	44189588	44188850	44189299	44190500	44190553	40658	332,355	18,20	185,105	2,1	265	100	5.2734844701e-05	0.00224438717308	0.874,0.87	0.972,0.975	-0.102
54584	ENSG00000172775.17	PSME3IP1	chr16	-	57178501	57178852	57175538	57175590	57185820	57186039	54584	64,63	1,0	38,39	4,4	451	100	5.27653992393e-05	0.00224438717308	0.934,1.0	0.678,0.684	0.286
66921	ENSG00000124786.12	SLC35B3	chr6	-	8422469	8422624	8420720	8420828	8427936	8428058	66921	77,76	0,0	87,46	7,2	255	100	5.2805956419e-05	0.00224438717308	1.0,1.0	0.83,0.9	0.135
47554	ENSG00000162004.19	CCDC78	chr16	-	725965	726085	724105	725880	726788	726893	47554	8,8	1,4	12,8	0,0	220	100	5.29879148382e-05	0.00224983676947	0.784,0.476	1.0,1.0	-0.37
72786	ENSG00000103148.17	NPRL3	chr16	-	124936	125073	119125	119255	138149	138334	72786	11,10	0,1	3,9	2,5	237	100	5.35545780731e-05	0.00226929393829	1.0,0.808	0.388,0.432	0.494
77023	ENSG00000171634.19	BPTF	chr17	+	67924546	67924589	67922839	67922990	67928354	67928601	77023	404,371	19,15	385,485	4,6	143	100	5.35113451411e-05	0.00226929393829	0.937,0.945	0.985,0.983	-0.043
74460	ENSG00000072736.19	NFATC3	chr16	+	68214328	68214432	68190767	68191775	68217710	68218090	74460	4,1	6,6	15,9	0,3	204	100	5.36686661752e-05	0.00227182882652	0.246,0.076	1.0,0.595	-0.636
32838	ENSG00000009830.13	POMT2	chr14	-	77292769	77293290	77291313	77291380	77296163	77296273	32838	5,6	61,48	1,20	12,15	621	100	5.40463915895e-05	0.00228550725646	0.013,0.02	0.013,0.177	-0.079
9585	ENSG00000132423.12	COQ3	chr6	-	99383007	99383130	99380188	99380341	99383697	99383824	9585	8,7	3,1	2,0	3,6	223	100	5.44523349953e-05	0.00229803125462	0.545,0.758	0.23,0.0	0.536
51396	ENSG00000156170.14	NDUFAF6	chr8	+	95034007	95034122	95031994	95032098	95035453	95035576	51396	16,11	3,3	10,14	0,0	215	100	5.4412150343e-05	0.00229803125462	0.713,0.63	1.0,1.0	-0.329
66277	ENSG00000003402.21	CFLAR	chr2	+	201145377	201145432	201140185	201140439	201149002	201149052	66277	53,38	0,0	40,54	2,8	155	100	5.46547528394e-05	0.00230425098451	1.0,1.0	0.928,0.813	0.129
34232	ENSG00000204387.14	SNHG32	chr6	+	31836294	31836517	31835410	31835451	31837235	31837435	34232	48,40	164,150	6,1	49,44	323	100	5.49547578116e-05	0.00231456834586	0.083,0.076	0.037,0.007	0.058
50639	ENSG00000163466.16	ARPC2	chr2	+	218234848	218235044	218234351	218234397	218238663	218238723	50639	30,28	396,301	20,14	478,594	296	100	5.52045979844e-05	0.00232275426595	0.025,0.03	0.014,0.008	0.017
75962	ENSG00000173065.14	FAM222B	chr17	-	28790377	28790425	28766585	28766707	28834292	28834326	75962	6,7	2,3	0,2	10,3	148	100	5.54229825119e-05	0.00232960156914	0.67,0.612	0.0,0.311	0.486
8507	ENSG00000184988.8	TMEM106A	chr17	+	43212204	43212394	43211874	43211922	43213020	43213252	8507	53,64	4,5	37,48	0,0	290	100	5.57697455461e-05	0.00234182587491	0.82,0.815	1.0,1.0	-0.183
31754	ENSG00000180530.11	NRIP1	chr21	-	15014343	15014466	14961234	14968526	15064744	15065000	31754	81,84	7,6	44,32	0,0	223	100	5.58985138345e-05	0.00234488104377	0.838,0.863	1.0,1.0	-0.149
77906	ENSG00000186481.16	ANKRD20A5P	chr18	+	14191861	14191917	14189175	14189313	14198458	14198489	77906	7,5	0,0	1,10	2,3	156	100	5.59785773553e-05	0.00234588903001	1.0,1.0	0.243,0.681	0.538
27154	ENSG00000080947.15	CROCCP3	chr1	-	16476398	16476504	16475824	16476062	16476929	16477074	27154	16,13	4,2	12,9	0,0	206	100	5.61203000907e-05	0.0023494763633	0.66,0.759	1.0,1.0	-0.29
52191	ENSG00000249859.14	PVT1	chr8	+	127939507	127939676	127890586	127890998	127989161	127989291	52191	17,18	2,4	9,4	0,0	269	100	5.6729408193e-05	0.00237260406993	0.76,0.626	1.0,1.0	-0.307
64080	ENSG00000032742.18	IFT88	chr13	+	20690704	20690815	20670972	20671039	20691053	20691217	64080	162,117	13,4	98,158	0,2	211	100	5.73796281832e-05	0.00239305316611	0.855,0.933	1.0,0.974	-0.093
73211	ENSG00000258867.8	LINC01146	chr14	+	88086827	88087037	88024549	88024669	88096498	88096594	73211	47,56	50,55	50,61	15,26	310	100	5.73898334832e-05	0.00239305316611	0.233,0.247	0.518,0.431	-0.235
77619	ENSG00000141580.16	WDR45B	chr17	-	82630920	82631022	82627203	82627291	82643948	82644023	77619	568,422	20,6	611,504	0,6	202	100	5.73835371687e-05	0.00239305316611	0.934,0.972	1.0,0.977	-0.035
6432	ENSG00000244560.7	ENSG00000244560	chr7	+	149289937	149290038	149287564	149287776	149292210	149292308	6432	21,20	3,5	9,4	0,0	201	100	5.76199624771e-05	0.00240025843692	0.777,0.666	1.0,1.0	-0.278
68081	ENSG00000185813.11	PCYT2	chr17	-	81905381	81905447	81905065	81905154	81905669	81905735	68081	837,728	26,23	478,371	3,4	166	100	5.81988725051e-05	0.00242196401335	0.951,0.95	0.99,0.982	-0.036
27429	ENSG00000163597.17	SNHG16	chr17	+	76558373	76558600	76557765	76557857	76558944	76559043	27429	24,17	153,109	25,30	65,62	327	100	5.85450018497e-05	0.00243394886041	0.046,0.046	0.105,0.129	-0.071
61739	ENSG00000148481.14	MINDY3	chr10	-	15821655	15821726	15816834	15816915	15833629	15833709	61739	21,5	6,3	55,21	2,0	171	100	5.88650304654e-05	0.00244482589329	0.672,0.494	0.941,1.0	-0.387
15554	ENSG00000120519.16	SLC10A7	chr4	-	146256825	146256936	146256490	146256520	146258691	146258837	15554	17,14	4,2	10,21	0,0	211	100	5.90083147669e-05	0.00244834796602	0.668,0.768	1.0,1.0	-0.282
66619	ENSG00000176834.14	VSIG10	chr12	-	118121500	118121618	118117666	118117882	118126480	118126670	66619	20,22	4,4	8,8	0,0	218	100	5.91072730594e-05	0.00245002572934	0.696,0.716	1.0,1.0	-0.294
26565	ENSG00000246090.9	ENSG00000246090	chr4	+	99102380	99102665	99088834	99089284	99102767	99103120	26565	7,4	0,1	5,1	9,2	385	100	5.98159936792e-05	0.0024757156947	1.0,0.51	0.126,0.115	0.635
52242	ENSG00000249859.14	PVT1	chr8	+	128070161	128070272	127989161	127989291	128096517	128096654	52242	5,11	13,5	0,0	4,1	211	100	5.98453190742e-05	0.0024757156947	0.154,0.51	0.0,0.0	0.332
77019	ENSG00000171634.19	BPTF	chr17	+	67875555	67875744	67874816	67875020	67891843	67892034	77019	148,138	81,57	52,56	43,84	289	100	5.99514011668e-05	0.00247765588336	0.387,0.456	0.295,0.187	0.18
68336	ENSG00000080298.16	RFX3	chr9	-	3301545	3301620	3293076	3293258	3330258	3330517	68336	6,6	2,3	4,6	0,0	175	100	6.00161916825e-05	0.00247788744062	0.632,0.533	1.0,1.0	-0.417
69485	ENSG00000125952.20	MAX	chr14	-	65077343	65077428	65075126	65076663	65077912	65078036	69485	10,4	332,328	12,16	131,213	185	100	6.02357371573e-05	0.00248450161191	0.016,0.007	0.047,0.039	-0.032
46575	ENSG00000154743.19	TSEN2	chr3	+	12487042	12488346	12484496	12484517	12489783	12489989	46575	11,18	2,5	30,20	1,0	1404	100	6.06207326855e-05	0.00249792024988	0.281,0.204	0.681,1.0	-0.598
3728	ENSG00000101294.18	HM13	chr20	+	31568077	31568224	31561633	31561736	31569119	31569326	3728	9,8	12,15	1,0	4,14	247	100	6.08158028719e-05	0.00250349418607	0.233,0.178	0.092,0.0	0.16
13512	ENSG00000177034.17	MTX3	chr5	-	79985570	79985659	79976715	79983794	79986949	79987107	13512	8,6	3,7	2,0	5,15	189	100	6.1013873362e-05	0.00250878593971	0.585,0.312	0.175,0.0	0.361
40657	ENSG00000168591.16	TMUB2	chr17	+	44189410	44189588	44188934	44189299	44190500	44191226	40657	344,361	18,20	185,108	2,1	278	100	6.10642033336e-05	0.00250878593971	0.873,0.867	0.971,0.975	-0.103
25073	ENSG00000090615.16	GOLGA3	chr12	-	132824918	132825106	132821995	132822311	132827606	132827713	25073	1,0	12,6	4,7	7,2	288	100	6.13243930738e-05	0.00251700560396	0.028,0.0	0.166,0.549	-0.344
11592	ENSG00000136098.17	NEK3	chr13	-	52154079	52154173	52153894	52153992	52156074	52156248	11592	190,160	36,44	217,251	12,30	194	100	6.14065319022e-05	0.00251790838206	0.731,0.652	0.903,0.812	-0.166
42460	ENSG00000092758.18	COL9A3	chr20	+	62832153	62832189	62830516	62830588	62833019	62833064	42460	433,283	16,15	354,59	0,3	136	100	6.17903842695e-05	0.00253116872548	0.952,0.933	1.0,0.935	-0.025
58317	ENSG00000023839.12	ABCC2	chr10	+	99796362	99796853	99794412	99794468	99797096	99797331	58317	582,578	264,289	836,1055	163,329	591	100	6.25239158615e-05	0.00255871333093	0.272,0.253	0.465,0.352	-0.146
73504	ENSG00000283399.1	ENSG00000283399	chr16	+	20727342	20727466	20718349	20718493	20729229	20729357	73504	13,12	5,1	3,2	0,0	224	100	6.29453612635e-05	0.00257344487236	0.537,0.843	1.0,1.0	-0.31
11914	ENSG00000237765.8	FAM200B	chr4	+	15684849	15684959	15681795	15681968	15686235	15686396	11914	7,12	12,14	0,5	14,33	210	100	6.3237456372e-05	0.00258286449855	0.217,0.29	0.0,0.067	0.22
34238	ENSG00000120071.15	KANSL1	chr17	-	46039026	46039215	46038537	46038686	46039701	46039884	34238	372,409	41,42	223,391	14,10	289	100	6.34310179535e-05	0.00258572499184	0.758,0.771	0.846,0.931	-0.124
50746	ENSG00000170791.18	CHCHD7	chr8	+	56216679	56216754	56216388	56216506	56217330	56217412	50746	4,3	0,0	11,6	4,2	175	100	6.33833672976e-05	0.00258572499184	1.0,1.0	0.611,0.632	0.379
77427	ENSG00000183077.16	AFMID	chr17	+	78205945	78206050	78190969	78191060	78206910	78207052	77427	304,226	19,27	246,165	7,3	205	100	6.37134348043e-05	0.00259471103899	0.886,0.803	0.945,0.964	-0.11
30589	ENSG00000153391.16	INO80C	chr18	-	35478281	35478349	35468332	35468742	35497718	35497960	30589	23,10	4,7	18,18	1,0	168	100	6.46408021607e-05	0.00262736619656	0.774,0.46	0.915,1.0	-0.341
31586	ENSG00000130511.16	SSBP4	chr19	+	18431352	18431418	18430840	18430930	18431646	18431706	31586	47,90	17,8	7,12	0,0	166	100	6.46005332284e-05	0.00262736619656	0.625,0.871	1.0,1.0	-0.252
71588	ENSG00000197535.16	MYO5A	chr15	-	52343116	52343197	52336462	52340394	52346360	52346461	71588	26,11	3,4	11,14	0,0	181	100	6.50113214617e-05	0.00263986321338	0.827,0.603	1.0,1.0	-0.285
31115	ENSG00000149292.17	TTC12	chr11	+	113340663	113340733	113339285	113339474	113341836	113341925	31115	11,3	3,2	20,6	0,0	170	100	6.52363082565e-05	0.0026464322143	0.683,0.469	1.0,1.0	-0.424
9769	ENSG00000229358.3	DPY19L1P1	chr7	-	32590878	32591004	32585976	32586136	32620403	32620484	9769	2,4	0,0	5,2	2,2	226	100	6.5840356221e-05	0.00266835093242	1.0,1.0	0.525,0.307	0.584
60954	ENSG00000149532.16	CPSF7	chr11	-	61421191	61421257	61420469	61420573	61421389	61421608	60954	5,5	82,52	13,16	38,6	166	100	6.59373610268e-05	0.00266969789109	0.035,0.055	0.171,0.616	-0.349
59273	ENSG00000178982.10	EIF3K	chr19	+	38632600	38632678	38632025	38632496	38634992	38635102	59273	555,292	30,20	574,239	16,0	178	100	6.60277702244e-05	0.00267077545937	0.912,0.891	0.953,1.0	-0.075
21881	ENSG00000149150.9	SLC43A1	chr11	-	57491223	57491362	57489250	57489392	57491715	57491862	21881	344,339	12,15	162,165	2,0	239	100	6.730951675e-05	0.00271999316481	0.923,0.904	0.971,1.0	-0.072
73740	ENSG00000102886.15	GDPD3	chr16	-	30108212	30108264	30104809	30105009	30108372	30108432	73740	12,17	0,0	7,18	4,2	152	100	6.75688500099e-05	0.00272783983188	1.0,1.0	0.535,0.856	0.304
1762	ENSG00000100225.18	FBXO7	chr22	+	32479132	32479275	32475236	32475398	32483896	32484124	1762	228,258	11,3	303,306	1,0	243	100	6.76649420159e-05	0.0027290874735	0.895,0.973	0.992,1.0	-0.062
77373	ENSG00000182534.14	MXRA7	chr17	-	76683846	76683927	76679568	76680879	76685071	76685165	77373	33,42	90,64	68,37	428,121	181	100	6.83323393278e-05	0.00275070517881	0.168,0.266	0.081,0.145	0.104
77581	ENSG00000178927.19	CYBC1	chr17	-	82447579	82447621	82446622	82446696	82449169	82449292	77581	131,60	14,2	115,84	2,0	142	100	6.83123263885e-05	0.00275070517881	0.868,0.955	0.976,1.0	-0.077
46692	ENSG00000203985.11	LDLRAD1	chr1	-	54012142	54012280	54010281	54010410	54017375	54017427	46692	28,23	4,4	14,6	0,0	238	100	6.86822131698e-05	0.00276213338555	0.746,0.707	1.0,1.0	-0.274
8082	ENSG00000168894.10	RNF181	chr2	+	85596856	85596931	85596518	85596649	85597103	85597178	8082	433,449	19,8	320,381	3,1	175	100	6.89149300592e-05	0.00276883257863	0.929,0.97	0.984,0.995	-0.04
13098	ENSG00000145730.21	PAM	chr5	+	103025130	103025334	103019789	103019843	103028181	103028238	13098	378,289	49,43	318,306	94,76	304	100	6.91100570631e-05	0.00277220257837	0.717,0.689	0.527,0.57	0.154
28974	ENSG00000187583.11	PLEKHN1	chr1	+	973499	973640	972860	973010	973832	974051	28974	9,9	0,0	0,1	4,0	241	100	6.91974607524e-05	0.00277220257837	1.0,1.0	0.0,1.0	0.5
38737	ENSG00000170634.13	ACYP2	chr2	+	54222996	54223083	54138638	54138748	54304687	54305251	38737	10,8	67,71	0,0	38,43	187	100	6.91666786514e-05	0.00277220257837	0.074,0.057	0.0,0.0	0.066
19515	ENSG00000115204.15	MPV17	chr2	-	27312993	27313109	27312679	27312772	27322447	27322522	19515	153,75	9,8	121,75	2,0	216	100	6.95354650607e-05	0.00278308053993	0.887,0.813	0.966,1.0	-0.133
51106	ENSG00000213614.11	HEXA	chr15	-	72346526	72346710	72343455	72346325	72348047	72348134	51106	748,625	11,9	860,394	0,0	284	100	7.00173086081e-05	0.00279968923102	0.96,0.961	1.0,1.0	-0.04
63654	ENSG00000137513.11	NARS2	chr11	-	78493062	78493195	78475771	78478683	78528841	78528936	63654	152,144	6,2	246,159	17,49	233	100	7.02760119504e-05	0.00280735232853	0.916,0.969	0.861,0.582	0.221
50543	ENSG00000186260.17	MRTFB	chr16	+	14092720	14092882	14079289	14079354	14140543	14140760	50543	8,13	26,36	0,2	17,27	262	100	7.11419848938e-05	0.00283923660398	0.105,0.121	0.0,0.027	0.099
27814	ENSG00000118004.18	COLEC11	chr2	+	3637532	3637604	3613310	3613382	3640277	3640331	27814	13,16	4,4	5,3	0,0	172	100	7.13529268492e-05	0.00284494312623	0.654,0.699	1.0,1.0	-0.324
77042	ENSG00000123737.13	EXOSC9	chr4	+	121816143	121816194	121813865	121814047	121816368	121816447	77042	35,37	135,148	71,168	136,326	151	100	7.18251282316e-05	0.00286104566453	0.147,0.142	0.257,0.254	-0.111
7898	ENSG00000054523.20	KIF1B	chr1	+	10326110	10326359	10324757	10324895	10334519	10334638	7898	100,111	246,326	43,73	195,408	349	100	7.213890546e-05	0.00287081300103	0.104,0.089	0.059,0.049	0.043
8933	ENSG00000112759.19	SLC29A1	chr6	+	44226060	44226167	44219552	44219782	44227259	44227342	8933	21,3	11,8	11,1	1,0	207	100	7.24599904059e-05	0.00288085232511	0.48,0.153	0.842,1.0	-0.605
42671	ENSG00000048991.17	R3HDM1	chr2	+	135616667	135616757	135604855	135605016	135621493	135621608	42671	96,124	72,93	43,41	56,91	190	100	7.27188717403e-05	0.00288840186471	0.412,0.412	0.288,0.192	0.172
68637	ENSG00000092199.19	HNRNPC	chr14	-	21268622	21268668	21263666	21263829	21269297	21269392	68637	33,20	723,879	2,1	393,613	146	100	7.29405415958e-05	0.0028944604492	0.03,0.015	0.003,0.001	0.02
51445	ENSG00000132541.11	RIDA	chr8	-	98108645	98108713	98106271	98106326	98117031	98117159	51445	65,62	5,10	26,14	0,0	168	100	7.31648128044e-05	0.00290061068945	0.886,0.787	1.0,1.0	-0.163
6455	ENSG00000106462.12	EZH2	chr7	-	148818977	148819059	148816683	148818117	148819595	148819687	6455	20,27	408,448	30,32	200,264	182	100	7.37436830364e-05	0.00292079403058	0.026,0.032	0.076,0.062	-0.04
52712	ENSG00000155666.12	KDM8	chr16	+	27220392	27220485	27218960	27219110	27220565	27220859	52712	18,10	4,3	3,3	0,0	193	100	7.40817790662e-05	0.00293141179641	0.7,0.633	1.0,1.0	-0.334
42027	ENSG00000026950.17	BTN3A1	chr6	+	26409893	26409914	26409532	26409733	26410005	26410032	42027	30,25	4,5	29,24	0,0	121	100	7.41918856303e-05	0.0029329964985	0.861,0.805	1.0,1.0	-0.167
23176	ENSG00000071243.16	ING3	chr7	+	120964741	120964838	120955558	120955624	120966625	120966697	23176	15,17	2,4	12,23	0,0	197	100	7.42916416653e-05	0.00293416941351	0.792,0.683	1.0,1.0	-0.262
53790	ENSG00000126581.13	BECN1	chr17	-	42815907	42816054	42813547	42814673	42818220	42818415	53790	144,109	9,1	275,170	0,0	247	100	7.47149260204e-05	0.00294810591691	0.866,0.978	1.0,1.0	-0.078
47843	ENSG00000132854.19	KANK4	chr1	-	62253066	62253209	62236164	62238381	62263091	62263311	47843	44,29	6,4	11,13	0,0	243	100	7.5685589313e-05	0.00297906809056	0.751,0.749	1.0,1.0	-0.25
47980	ENSG00000163939.18	PBRM1	chr3	-	52558248	52558413	52554723	52554879	52561766	52561968	47980	39,23	6,12	25,44	2,0	265	100	7.57261342436e-05	0.00297906809056	0.71,0.42	0.825,1.0	-0.348
63415	ENSG00000110074.12	FOXRED1	chr11	+	126274930	126275021	126273315	126273454	126275326	126275428	63415	27,21	9,9	30,15	0,2	191	100	7.57842473771e-05	0.00297906809056	0.611,0.55	1.0,0.797	-0.318
66924	ENSG00000124786.12	SLC35B3	chr6	-	8434384	8434430	8429863	8430157	8435342	8435545	66924	51,45	10,17	30,20	2,0	146	100	7.57600785221e-05	0.00297906809056	0.777,0.645	0.911,1.0	-0.244
35739	ENSG00000135597.19	REPS1	chr6	-	138917554	138917646	138915857	138915976	138920214	138920316	35739	490,641	0,1	135,313	6,7	192	100	7.65757228841e-05	0.00300453855534	1.0,0.997	0.921,0.959	0.058
49933	ENSG00000004455.18	AK2	chr1	-	33024441	33024567	33021592	33021703	33036735	33036844	49933	1121,644	22,13	1089,603	9,0	226	100	7.65531846704e-05	0.00300453855534	0.958,0.956	0.982,1.0	-0.034
47229	ENSG00000204842.18	ATXN2	chr12	-	111479069	111479102	111470557	111470742	111482786	111482831	47229	39,39	10,4	8,17	0,0	133	100	7.67702351558e-05	0.00300935008876	0.746,0.88	1.0,1.0	-0.187
15756	ENSG00000246876.7	LINC02466	chr4	-	129744307	129744379	129726921	129727033	129749627	129749720	15756	0,0	6,3	2,8	8,0	172	100	7.68427409669e-05	0.00300937450943	0.0,0.0	0.127,1.0	-0.564
56934	ENSG00000172661.20	WASHC2C	chr10	+	45751481	45751553	45750750	45750838	45752587	45752706	56934	87,63	7,6	76,53	1,0	172	100	7.73046653845e-05	0.00302463534236	0.878,0.859	0.978,1.0	-0.12
22331	ENSG00000069493.15	CLEC2D	chr12	+	9693824	9693948	9692827	9692931	9694759	9695106	22331	7,2	3,4	1,0	7,11	224	100	7.75424944953e-05	0.00303110787306	0.51,0.182	0.06,0.0	0.316
23879	ENSG00000169118.18	CSNK1G1	chr15	-	64188374	64188485	64180347	64180454	64203081	64203189	23879	6,6	10,10	0,0	2,6	211	100	7.76943552599e-05	0.00303421099156	0.221,0.221	0.0,0.0	0.221
48742	ENSG00000087274.19	ADD1	chr4	+	2926641	2926675	2926013	2926112	2928170	2928523	48742	35,24	463,399	37,28	226,178	134	100	7.7805408532e-05	0.00303571614929	0.053,0.043	0.109,0.105	-0.059
36813	ENSG00000058056.10	USP13	chr3	+	179701007	179701129	179653039	179653393	179706933	179707076	36813	60,72	0,0	67,87	0,13	222	100	7.83371868068e-05	0.00305023654642	1.0,1.0	1.0,0.751	0.125
45478	ENSG00000061938.21	TNK2	chr3	-	195885412	195885543	195884829	195885033	195886976	195887047	45478	0,4	45,29	8,2	13,2	231	100	7.83760069518e-05	0.00305023654642	0.0,0.056	0.21,0.302	-0.228
62455	ENSG00000077458.13	FAM76B	chr11	-	95788858	95788947	95788498	95788563	95789391	95789768	62455	0,0	8,2	4,4	0,9	189	100	7.83961429345e-05	0.00305023654642	0.0,0.0	1.0,0.19	-0.595
31058	ENSG00000171298.13	GAA	chr17	+	80101810	80101925	80101586	80101625	80104554	80105132	31058	36,27	11,3	8,2	0,0	215	100	7.88913589278e-05	0.00306665435609	0.604,0.807	1.0,1.0	-0.294
46555	ENSG00000111801.16	BTN3A3	chr6	+	26443569	26443659	26443366	26443442	26443956	26444284	46555	11,4	2,0	3,0	4,3	190	100	7.90446222749e-05	0.00306976169902	0.743,1.0	0.283,0.0	0.73
36131	ENSG00000130731.16	METTL26	chr16	-	635280	635340	634888	634956	635611	635774	36131	14,15	2,5	3,4	0,0	160	100	8.012981863e-05	0.00310614338606	0.814,0.652	1.0,1.0	-0.267
53551	ENSG00000107159.14	CA9	chr9	+	35675537	35675567	35673927	35674362	35675760	35675931	53551	156,84	13,7	121,48	0,2	130	100	8.01254864874e-05	0.00310614338606	0.902,0.902	1.0,0.949	-0.072
4977	ENSG00000073008.15	PVR	chr19	+	44658741	44658900	44657761	44657910	44661291	44661323	4977	65,62	30,19	39,48	5,1	259	100	8.03135076286e-05	0.0031103839009	0.456,0.558	0.751,0.949	-0.343
12085	ENSG00000055147.19	FAM114A2	chr5	-	154038292	154038434	154034743	154034967	154038826	154038910	12085	14,7	4,1	4,10	0,0	242	100	8.06470944855e-05	0.00312041646085	0.591,0.743	1.0,1.0	-0.333
56587	ENSG00000095787.25	WAC	chr10	+	28534233	28534346	28533997	28534034	28535561	28535757	56587	8,6	207,253	12,7	60,73	213	100	8.07454769889e-05	0.00312133831407	0.018,0.011	0.086,0.043	-0.05
46720	ENSG00000169814.17	BTD	chr3	+	15632590	15632866	15601735	15601894	15635423	15635429	46720	8,4	19,7	0,0	22,5	376	100	8.08918091606e-05	0.00312411032335	0.101,0.132	0.0,0.0	0.117
32251	ENSG00000171603.18	CLSTN1	chr1	-	9737497	9737554	9735884	9736042	9741093	9741256	32251	50,25	325,221	12,9	231,182	157	100	8.13954547478e-05	0.00314066425163	0.089,0.067	0.032,0.031	0.046
57703	ENSG00000198646.14	NCOA6	chr20	-	34740362	34743341	34736689	34736758	34746806	34746928	57703	4965,6060	21,16	1726,2760	3,0	3079	100	8.17707174938e-05	0.00315223857079	0.885,0.925	0.949,1.0	-0.069
12959	ENSG00000175582.20	RAB6A	chr11	-	73716250	73716362	73679653	73679720	73720845	73720899	12959	16,32	4,0	6,16	4,17	212	100	8.20323499064e-05	0.00315941520592	0.654,1.0	0.414,0.307	0.466
79075	ENSG00000132024.18	CC2D1A	chr19	+	13919817	13919951	13919129	13919202	13920556	13920668	79075	151,123	10,6	69,26	0,0	234	100	8.21669589797e-05	0.00316169093537	0.866,0.898	1.0,1.0	-0.118
57099	ENSG00000204147.11	ASAH2B	chr10	+	50745201	50745274	50742914	50743010	50749342	50749402	57099	7,13	2,4	11,5	0,0	173	100	8.23888205181e-05	0.00316731677777	0.669,0.653	1.0,1.0	-0.339
78528	ENSG00000064666.15	CNN2	chr19	+	1036129	1036246	1032558	1032696	1036415	1036472	78528	943,704	49,33	611,270	14,2	217	100	8.27257813599e-05	0.00317735306113	0.899,0.908	0.953,0.984	-0.065
41405	ENSG00000144908.14	ALDH1L1	chr3	-	126114556	126114656	126112781	126112880	126118004	126118098	41405	50,25	4,5	36,10	0,0	200	100	8.32742945004e-05	0.00319548885358	0.862,0.714	1.0,1.0	-0.212
1928	ENSG00000100325.15	ASCC2	chr22	-	29833540	29833614	29832244	29832342	29834488	29834550	1928	4,1	43,29	9,7	20,13	174	100	8.3605409092e-05	0.00320525682384	0.051,0.019	0.205,0.236	-0.185
61142	ENSG00000072518.22	MARK2	chr11	+	63908259	63908304	63904785	63905043	63908876	63909255	61142	53,48	7,8	72,73	3,0	145	100	8.38836197442e-05	0.00321298054949	0.839,0.805	0.943,1.0	-0.149
32755	ENSG00000072803.18	FBXW11	chr5	-	171914342	171914405	171910571	171910797	172006457	172006873	32755	41,74	23,34	72,62	14,8	163	100	8.410548503e-05	0.00321559463998	0.522,0.572	0.759,0.826	-0.246
64550	ENSG00000138107.13	ACTR1A	chr10	-	102490548	102490613	102489062	102489138	102502599	102502678	64550	300,298	24,14	246,318	9,1	165	100	8.40351068433e-05	0.00321559463998	0.883,0.928	0.943,0.995	-0.064
42783	ENSG00000118482.12	PHF3	chr6	+	63646618	63646795	63635835	63636150	63691736	63692043	42783	26,32	4,4	13,5	0,0	277	100	8.56717073651e-05	0.00326950412839	0.701,0.743	1.0,1.0	-0.278
58274	ENSG00000171311.13	EXOSC1	chr10	-	97445452	97445606	97443236	97443311	97445731	97445847	58274	10,7	18,15	1,0	5,15	254	100	8.56117849112e-05	0.00326950412839	0.179,0.155	0.073,0.0	0.13
19649	ENSG00000182923.20	CEP63	chr3	+	134547334	134547468	134546148	134546288	134549061	134549176	19649	11,20	42,25	8,4	50,69	234	100	8.58620557803e-05	0.00327378412135	0.101,0.255	0.064,0.024	0.134
59371	ENSG00000255284.4	GATD1-DT	chr11	+	778112	778218	777607	777695	783529	783671	59371	10,8	2,3	4,10	0,0	206	100	8.59428716238e-05	0.00327388382214	0.708,0.564	1.0,1.0	-0.364
70393	ENSG00000198911.12	SREBF2	chr22	+	41900019	41900122	41898648	41898781	41900329	41900498	70393	2,0	77,47	15,0	50,32	203	100	8.66766007406e-05	0.00329883262728	0.013,0.0	0.129,0.0	-0.058
19648	ENSG00000182923.20	CEP63	chr3	+	134547334	134547452	134546148	134546288	134549061	134549176	19648	10,17	42,25	6,4	50,69	218	100	8.73921306553e-05	0.00332304409617	0.098,0.238	0.052,0.026	0.129
34233	ENSG00000204387.14	SNHG32	chr6	+	31836298	31836517	31835410	31835451	31837235	31837435	34233	47,38	164,150	6,1	49,44	319	100	8.75186722018e-05	0.00332483594531	0.082,0.074	0.037,0.007	0.056
50867	ENSG00000242086.8	MUC20-OT1	chr3	+	195663623	195663767	195662570	195662733	195664085	195664250	50867	16,10	12,19	16,48	0,10	244	100	8.76381006181e-05	0.00332635456244	0.353,0.177	1.0,0.663	-0.567
78096	ENSG00000187118.14	CMC1	chr3	+	28253730	28253765	28241623	28241812	28263290	28263380	78096	7,5	34,28	0,0	15,22	135	100	8.82970405036e-05	0.00334832934844	0.132,0.117	0.0,0.0	0.124
46556	ENSG00000111801.16	BTN3A3	chr6	+	26443640	26443659	26443381	26443442	26443956	26444304	46556	3,1	2,0	0,0	4,3	119	100	8.88218675426e-05	0.00336518324405	0.558,1.0	0.0,0.0	0.779
48611	ENSG00000090266.13	NDUFB2	chr7	+	140700873	140700959	140696708	140696842	140702865	140703010	48611	2,0	68,78	4,7	48,12	186	100	8.93365307014e-05	0.00338162193292	0.016,0.0	0.043,0.239	-0.133
46146	ENSG00000067836.13	ROGDI	chr16	-	4801266	4801321	4800497	4800578	4801502	4801585	46146	51,36	11,23	108,32	5,4	155	100	8.94584978046e-05	0.0033831797747	0.749,0.502	0.933,0.838	-0.26
17167	ENSG00000090097.22	PCBP4	chr3	-	51962809	51962892	51961940	51962088	51967325	51967434	17167	2,1	0,0	1,0	0,5	183	100	8.99515769434e-05	0.00339875701149	1.0,1.0	1.0,0.0	0.5
22563	ENSG00000157131.12	C8A	chr1	+	56874948	56875093	56867608	56867702	56881444	56881634	22563	143,117	9,3	96,81	0,0	245	100	9.06179830171e-05	0.00341505567256	0.866,0.941	1.0,1.0	-0.097
30490	ENSG00000168803.16	ADAL	chr15	+	43347015	43347096	43345853	43345980	43348906	43349045	30490	56,59	6,4	43,41	0,0	181	100	9.0634770582e-05	0.00341505567256	0.838,0.891	1.0,1.0	-0.135
44991	ENSG00000226453.4	LINC02542	chr6	-	81928856	81928901	81844603	81845909	82057938	82058005	44991	3,4	11,6	0,0	17,4	145	100	9.07092298551e-05	0.00341505567256	0.158,0.315	0.0,0.0	0.236
49189	ENSG00000156675.16	RAB11FIP1	chr8	-	37871277	37873179	37870419	37870528	37874514	37875322	49189	258,217	28,26	120,138	55,24	2002	100	9.06232468918e-05	0.00341505567256	0.315,0.294	0.098,0.223	0.144
5947	ENSG00000100342.22	APOL1	chr22	+	36253837	36253991	36253077	36253219	36254897	36254999	5947	41,35	2,2	64,47	14,22	254	100	9.09772001572e-05	0.003418995049	0.89,0.873	0.643,0.457	0.331
40352	ENSG00000116641.18	DOCK7	chr1	-	62487397	62487452	62477699	62477825	62488933	62489065	40352	8,8	12,5	21,16	1,3	155	100	9.09367555749e-05	0.003418995049	0.301,0.508	0.931,0.775	-0.449
12197	ENSG00000146856.14	AGBL3	chr7	+	134989249	134989310	134987874	134987996	134993492	134993678	12197	69,65	4,7	51,42	0,0	161	100	9.15734996726e-05	0.00343216165067	0.915,0.852	1.0,1.0	-0.117
12599	ENSG00000147140.17	NONO	chrX	+	71284396	71284453	71283589	71283721	71290628	71290791	12599	2295,2245	642,810	1475,1937	182,465	157	100	9.14731882158e-05	0.00343216165067	0.695,0.638	0.838,0.726	-0.116
49508	ENSG00000243818.7	ENSG00000243818	chr3	+	142935840	142935898	142933204	142933268	142938474	142938653	49508	0,1	6,0	1,2	0,0	158	100	9.1541563513e-05	0.00343216165067	0.0,1.0	1.0,1.0	-0.5
36592	ENSG00000144451.20	SPAG16	chr2	+	213350527	213350645	213340162	213340270	213364075	213364145	36592	43,32	8,2	12,16	0,0	218	100	9.17339022956e-05	0.00343509822863	0.711,0.88	1.0,1.0	-0.205
35532	ENSG00000117054.15	ACADM	chr1	+	75728400	75728488	75724430	75724817	75732643	75732741	35532	240,208	2,6	135,153	12,11	188	100	9.22905492554e-05	0.00345285419533	0.985,0.949	0.857,0.881	0.098
12287	ENSG00000121022.14	COPS5	chr8	-	67047767	67047859	67045811	67045960	67051229	67051341	12287	22,34	36,42	14,15	71,50	192	100	9.24387571458e-05	0.00345531122135	0.241,0.297	0.093,0.135	0.155
52797	ENSG00000080503.24	SMARCA2	chr9	+	2170418	2170472	2161685	2161903	2181570	2181676	52797	10,7	21,24	2,1	15,43	154	100	9.25766393348e-05	0.00345737823885	0.236,0.159	0.08,0.015	0.15
33626	ENSG00000068745.15	IP6K2	chr3	-	48708119	48708237	48695089	48695421	48715314	48715527	33626	6,4	12,10	0,0	7,8	218	100	9.2745054592e-05	0.00346058084714	0.187,0.155	0.0,0.0	0.171
37717	ENSG00000059377.18	TBXAS1	chr7	+	139782487	139782564	139780739	139780824	139782665	139782729	37717	0,2	5,4	2,2	1,0	177	100	9.32153099613e-05	0.00347503023288	0.0,0.22	0.531,1.0	-0.656
64338	ENSG00000064115.11	TM7SF3	chr12	-	26976259	26976357	26975495	26975658	26980565	26980608	64338	90,98	10,4	28,49	0,0	198	100	9.37491386128e-05	0.0034918217865	0.82,0.925	1.0,1.0	-0.127
35611	ENSG00000225210.10	DUXAP9	chr14	+	19068432	19068568	19062400	19062466	19092915	19093006	35611	6,10	14,19	1,1	21,13	236	100	9.49531668362e-05	0.00353352384853	0.154,0.182	0.02,0.032	0.142
56765	ENSG00000095794.20	CREM	chr10	+	35148367	35148491	35126840	35127193	35178888	35178986	56765	45,44	3,10	3,19	0,0	224	100	9.56686301132e-05	0.00355698685585	0.87,0.663	1.0,1.0	-0.234
53096	ENSG00000111731.13	C2CD5	chr12	-	22458483	22458585	22456970	22457161	22459491	22459542	53096	20,18	2,4	14,8	0,0	202	100	9.6046963987e-05	0.00356788478023	0.832,0.69	1.0,1.0	-0.239
13498	ENSG00000142405.23	NLRP12	chr19	-	53798242	53798413	53795858	53796029	53801226	53801397	13498	5,6	2,2	14,3	0,0	271	100	9.69612338473e-05	0.00359228500444	0.48,0.525	1.0,1.0	-0.498
60629	ENSG00000110514.19	MADD	chr11	+	47273826	47273976	47270147	47270246	47274562	47274726	60629	166,119	8,6	180,150	0,2	250	100	9.6925473803e-05	0.00359228500444	0.892,0.888	1.0,0.968	-0.094
67620	ENSG00000185864.18	NPIPB4	chr16	-	21857579	21857658	21857042	21857416	21863782	21863837	67620	17,8	6,4	8,17	1,0	179	100	9.68087645187e-05	0.00359228500444	0.613,0.528	0.817,1.0	-0.338
60450	ENSG00000111752.11	PHC1	chr12	+	8933206	8933350	8932562	8932831	8933864	8934000	60450	20,22	4,4	4,4	0,0	244	100	9.77072156855e-05	0.00361672200236	0.672,0.693	1.0,1.0	-0.318
25877	ENSG00000156976.17	EIF4A2	chr3	+	186788309	186788416	186787802	186787882	186789124	186789881	25877	687,736	683,753	425,586	1125,766	207	100	9.80126945918e-05	0.0036248246105	0.327,0.321	0.154,0.27	0.112
66114	ENSG00000120860.11	WASHC3	chr12	-	102019276	102019371	102012942	102013192	102025973	102026038	66114	0,0	121,69	8,8	82,83	195	100	9.89470285206e-05	0.00365614946956	0.0,0.0	0.048,0.047	-0.048
73692	ENSG00000103495.15	MAZ	chr16	+	29809539	29809764	29808569	29808741	29810076	29811164	73692	192,135	31,17	74,36	1,2	325	100	0.000100095843404	0.00369533728757	0.656,0.71	0.958,0.847	-0.219
13681	ENSG00000131844.17	MCCC2	chr5	+	71626639	71626753	71604355	71604468	71632120	71632185	13681	182,125	12,6	101,130	32,18	214	100	0.000100559225925	0.00370917356242	0.876,0.907	0.596,0.771	0.208
55147	ENSG00000177125.6	ZBTB34	chr9	+	126863591	126863712	126860706	126860739	126879389	126885834	55147	9,10	6,3	8,15	1,0	221	100	0.000100775109452	0.00371386439895	0.404,0.601	0.784,1.0	-0.39
76738	ENSG00000049283.19	EPN3	chr17	+	50540203	50540334	50539186	50539315	50540792	50541062	76738	6,2	3,1	1,2	0,0	231	100	0.000101878125802	0.00375121172973	0.464,0.464	1.0,1.0	-0.536
62384	ENSG00000166012.17	TAF1D	chr11	-	93733086	93733121	93732243	93732291	93734624	93734660	62384	34,44	3,6	55,35	0,0	135	100	0.000102028672092	0.00375345374089	0.894,0.845	1.0,1.0	-0.131
7126	ENSG00000239521.11	CASTOR3	chr7	-	100213046	100213133	100200652	100202603	100222596	100222720	7126	24,10	6,2	2,5	0,0	187	100	0.000102490066075	0.00376711731012	0.681,0.728	1.0,1.0	-0.295
47953	ENSG00000162174.12	ASRGL1	chr11	+	62356324	62356467	62337889	62338167	62356986	62357132	47953	449,456	17,14	818,755	12,4	243	100	0.000102822929918	0.00377603680791	0.916,0.931	0.966,0.987	-0.053
72697	ENSG00000183060.16	LYSMD4	chr15	-	99731717	99732007	99720783	99720966	99733344	99733437	72697	19,19	3,4	26,33	1,0	390	100	0.000103029254449	0.00378029775417	0.619,0.549	0.87,1.0	-0.351
37202	ENSG00000175581.14	MRPL48	chr11	+	73817822	73817947	73808312	73808350	73825707	73825796	37202	34,24	135,138	15,5	119,149	225	100	0.000103650760851	0.00379977154381	0.101,0.072	0.053,0.015	0.052
12545	ENSG00000154370.16	TRIM11	chr1	-	228400963	228401194	228397142	228397165	228402065	228402161	12545	118,49	7,2	85,39	0,0	331	100	0.000103966388729	0.0038049479329	0.836,0.881	1.0,1.0	-0.141
69506	ENSG00000072210.19	ALDH3A2	chr17	+	19673199	19673275	19671767	19671956	19675495	19675499	69506	1,2	87,59	2,18	53,95	176	100	0.000103973735465	0.0038049479329	0.006,0.019	0.021,0.097	-0.046
10449	ENSG00000123473.17	STIL	chr1	-	47312947	47313156	47310275	47310362	47314035	47314147	10449	22,18	30,16	14,17	3,0	309	100	0.000104458114154	0.00381600257335	0.192,0.267	0.602,1.0	-0.571
25715	ENSG00000093183.14	SEC22C	chr3	-	42563764	42563880	42563522	42563686	42568864	42569073	25715	2,9	18,16	0,0	8,22	216	100	0.000104421400912	0.00381600257335	0.049,0.207	0.0,0.0	0.128
70330	ENSG00000157426.14	AASDH	chr4	-	56384069	56384341	56381758	56382597	56387361	56387459	70330	41,33	15,23	71,47	10,2	372	100	0.000104794827142	0.00382496550854	0.424,0.278	0.656,0.863	-0.409
52093	ENSG00000254166.4	CASC19	chr8	-	127161921	127162084	127149615	127149672	127168897	127169117	52093	10,22	0,0	17,7	3,2	263	100	0.000105166267448	0.00383517925672	1.0,1.0	0.683,0.571	0.373
40351	ENSG00000116641.18	DOCK7	chr1	-	62487397	62487412	62477699	62477825	62488933	62489065	40351	9,9	12,5	21,18	1,3	115	100	0.000105273142695	0.00383573552561	0.395,0.61	0.948,0.839	-0.391
10659	ENSG00000137404.15	NRM	chr6	-	30689275	30689452	30688046	30688942	30690046	30690243	10659	63,51	8,3	25,10	0,0	277	100	0.000105407031857	0.00383727425104	0.74,0.86	1.0,1.0	-0.2
34289	ENSG00000144134.19	RABL2A	chr2	+	113640893	113641005	113635050	113635130	113641352	113641450	34289	15,12	1,5	6,6	0,0	212	100	0.000105685128095	0.00384405550625	0.876,0.531	1.0,1.0	-0.296
13571	ENSG00000233184.9	DPH5-DT	chr1	+	101077362	101077508	101025849	101026061	101083460	101083574	13571	6,3	2,2	12,5	0,0	246	100	0.000106192590123	0.00385916040408	0.549,0.379	1.0,1.0	-0.536
47785	ENSG00000173402.13	DAG1	chr3	+	49476848	49476900	49470135	49470433	49510418	49510819	47785	12,2	22,12	0,0	8,3	152	100	0.000106615838743	0.00387008986445	0.264,0.099	0.0,0.0	0.181
66465	ENSG00000066933.16	MYO9A	chr15	-	71847414	71847468	71830108	71830311	71848844	71848968	66465	5,6	24,13	0,0	13,7	154	100	0.000106678220556	0.00387008986445	0.119,0.231	0.0,0.0	0.175
56555	ENSG00000099246.18	RAB18	chr10	+	27514054	27514420	27509874	27509930	27526827	27526889	56555	48,54	222,191	18,50	236,341	466	100	0.000107229301121	0.00388671401855	0.044,0.057	0.016,0.031	0.027
55946	ENSG00000134461.16	ANKRD16	chr10	-	5880297	5880376	5878086	5878287	5883005	5883167	55946	35,31	8,2	16,11	0,0	179	100	0.000107450088371	0.00389134770731	0.71,0.896	1.0,1.0	-0.197
38198	ENSG00000131778.20	CHD1L	chr1	+	147270931	147271113	147268781	147268878	147272170	147272281	38198	162,125	6,5	174,157	29,16	282	100	0.000108294046926	0.00391852227706	0.905,0.899	0.68,0.777	0.173
28820	ENSG00000136100.14	VPS36	chr13	-	52427186	52427219	52426988	52427066	52433661	52433748	28820	28,21	0,0	26,24	2,6	133	100	0.000108513671473	0.0039230784596	1.0,1.0	0.907,0.75	0.171
32599	ENSG00000215908.11	CROCCP2	chr1	-	16642766	16642850	16633094	16633346	16643027	16643145	32599	122,96	9,4	166,129	2,0	184	100	0.000109093561801	0.0039406401767	0.88,0.929	0.978,1.0	-0.084
65328	ENSG00000181090.21	EHMT1	chr9	+	137775108	137775252	137762674	137762820	137776617	137776840	65328	91,49	8,2	65,19	0,0	244	100	0.000109515740941	0.00395247973663	0.823,0.909	1.0,1.0	-0.134
6699	ENSG00000130396.22	AFDN	chr6	+	167872216	167872377	167870382	167870498	167875334	167875495	6699	763,714	1,4	724,907	17,10	261	100	0.000109712647823	0.00395617571155	0.997,0.986	0.942,0.972	0.035
36979	ENSG00000151726.15	ACSL1	chr4	-	184780331	184780433	184776883	184776983	184783926	184783991	36979	24,26	4,4	6,11	0,0	202	100	0.000110563499934	0.0039834259249	0.748,0.763	1.0,1.0	-0.244
13101	ENSG00000145730.21	PAM	chr5	+	103025133	103025334	103019789	103019843	103028181	103028238	13101	225,148	49,43	202,139	94,76	301	100	0.000110720907618	0.00398566706572	0.604,0.533	0.417,0.378	0.171
44889	ENSG00000128739.23	SNRPN	chr15	+	24967028	24967152	24962113	24962209	24967931	24968082	44889	117,101	1195,688	69,126	549,208	224	100	0.000111656931448	0.00401590844937	0.042,0.062	0.053,0.213	-0.081
5046	ENSG00000105429.13	MEGF8	chr19	+	42371349	42371482	42370700	42370831	42375506	42378765	5046	75,74	13,18	30,52	2,1	233	100	0.000112646045446	0.00404453404168	0.712,0.638	0.866,0.957	-0.236
65014	ENSG00000123349.15	PFDN5	chr12	+	53295838	53297924	53295555	53295639	53298044	53298150	65014	2002,2065	12,4	1403,1464	0,1	2186	100	0.000112583499431	0.00404453404168	0.884,0.959	1.0,0.985	-0.071
4365	ENSG00000063245.15	EPN1	chr19	+	55689296	55689371	55688869	55688994	55689866	55689915	4365	344,255	8,7	286,87	15,19	175	100	0.000113279063156	0.00406377718854	0.961,0.954	0.916,0.723	0.138
71705	ENSG00000140262.18	TCF12	chr15	+	57232290	57232430	57231151	57231257	57232711	57232856	71705	254,228	8,9	105,100	0,0	240	100	0.000113443050576	0.00406617578113	0.93,0.913	1.0,1.0	-0.079
45205	ENSG00000090661.12	CERS4	chr19	+	8210705	8210862	8209312	8209494	8251043	8251249	45205	120,131	12,17	49,7	1,0	257	100	0.000113905691691	0.00407926585342	0.796,0.75	0.95,1.0	-0.202
76601	ENSG00000006025.12	OSBPL7	chr17	-	47819728	47819782	47818985	47819099	47819970	47820096	76601	22,17	6,2	2,0	3,3	154	100	0.000114225044772	0.00408720640973	0.704,0.847	0.302,0.0	0.624
4633	ENSG00000126457.22	PRMT1	chr19	+	49679871	49679925	49677270	49677316	49680486	49680588	4633	18,25	137,89	20,15	34,23	154	100	0.000114482956039	0.00409293676736	0.079,0.154	0.276,0.298	-0.171
42674	ENSG00000048991.17	R3HDM1	chr2	+	135641535	135641604	135638895	135639122	135645378	135645527	42674	32,30	119,144	6,7	58,113	169	100	0.000115116250246	0.00411206639637	0.137,0.11	0.058,0.035	0.077
54788	ENSG00000157654.19	PALM2AKAP2	chr9	+	109942685	109943381	109931926	109932028	110015953	110016039	54788	56,26	4,1	40,42	0,0	796	100	0.00011546723616	0.0041210876742	0.638,0.766	1.0,1.0	-0.298
50314	ENSG00000177565.18	TBL1XR1	chr3	-	177131362	177131449	177064919	177065022	177197120	177197163	50314	2,6	6,3	0,0	1,1	187	100	0.000115794589619	0.00412444577196	0.151,0.517	0.0,0.0	0.334
52243	ENSG00000249859.14	PVT1	chr8	+	128074069	128074291	128070159	128070361	128096517	128096654	52243	5,4	13,5	16,11	4,3	322	100	0.000115799366743	0.00412444577196	0.107,0.199	0.554,0.532	-0.39
53550	ENSG00000146918.20	NCAPG2	chr7	-	158703649	158703702	158701821	158701938	158704723	158704804	53550	4,10	45,31	0,1	21,44	153	100	0.000115856878725	0.00412444577196	0.055,0.174	0.0,0.015	0.107
10596	ENSG00000103852.13	TTC23	chr15	-	99234987	99235080	99228532	99228732	99241364	99241559	10596	6,3	11,4	0,0	6,1	193	100	0.000116140036947	0.00413101329379	0.22,0.28	0.0,0.0	0.25
51381	ENSG00000156170.14	NDUFAF6	chr8	+	94950770	94950809	94949765	94950359	94957994	94958179	51381	20,9	4,3	6,8	0,0	139	100	0.000116271666287	0.00413218447292	0.782,0.683	1.0,1.0	-0.267
991	ENSG00000147050.17	KDM6A	chrX	+	45060021	45060156	45059246	45059466	45060608	45060764	991	22,19	4,2	11,14	0,0	235	100	0.000116967188653	0.0041533768897	0.701,0.802	1.0,1.0	-0.248
13975	ENSG00000155545.20	MIER3	chr5	-	56938295	56938338	56937577	56937698	56938882	56938971	13975	0,0	12,17	1,6	8,10	143	100	0.000117516374411	0.0041693415379	0.0,0.0	0.08,0.296	-0.188
73287	ENSG00000256340.10	ABCC6P1	chr16	+	18585805	18585937	18582405	18582467	18591103	18591307	73287	111,90	5,6	72,56	0,0	232	100	0.000117968714048	0.00418184607419	0.905,0.866	1.0,1.0	-0.115
68084	ENSG00000185813.11	PCYT2	chr17	-	81907203	81907257	81906759	81906898	81907553	81907598	68084	40,31	168,80	48,16	53,6	154	100	0.000118583478755	0.00420008235032	0.134,0.201	0.37,0.634	-0.335
49502	ENSG00000131791.8	PRKAB2	chr1	-	147160796	147160833	147159218	147159642	147161711	147161780	49502	14,16	77,72	2,0	31,28	137	100	0.000119439853837	0.00422683810726	0.117,0.14	0.045,0.0	0.106
5958	ENSG00000144741.19	SLC25A26	chr3	+	66236543	66236700	66220741	66221127	66243202	66243312	5958	60,12	5,2	39,20	0,0	257	100	0.000119596994663	0.00422882447767	0.824,0.7	1.0,1.0	-0.238
40381	ENSG00000143363.17	PRUNE1	chr1	+	151024610	151024795	151017811	151017904	151025514	151025673	40381	246,170	5,8	165,107	0,0	285	100	0.0001198008242	0.00423245696636	0.945,0.882	1.0,1.0	-0.087
45622	ENSG00000235823.5	OLMALINC	chr10	+	100380894	100381109	100373571	100374012	100381215	100381448	45622	171,224	36,44	173,238	9,24	315	100	0.000120716517607	0.00426121164386	0.601,0.618	0.859,0.759	-0.2
8700	ENSG00000060762.19	MPC1	chr6	-	166368732	166368961	166366794	166366891	166370217	166370221	8700	96,89	196,185	194,216	259,219	329	100	0.000121288125567	0.00427778212036	0.13,0.128	0.185,0.231	-0.079
65116	ENSG00000170473.17	PYM1	chr12	-	55927075	55927267	55913825	55914366	55927724	55927875	65116	4,9	6,6	0,0	1,2	292	100	0.000121474430852	0.00428074667308	0.186,0.339	0.0,0.0	0.263
51085	ENSG00000103145.11	HCFC1R1	chr16	-	3023473	3023530	3023232	3023361	3023846	3023942	51085	271,207	120,97	99,71	21,13	157	100	0.000121733416838	0.0042862653456	0.59,0.576	0.75,0.777	-0.181
23403	ENSG00000148187.18	MRRF	chr9	+	122285779	122285946	122285168	122285287	122286038	122286166	23403	46,32	8,2	43,38	1,0	267	100	0.000122727400827	0.00431763246691	0.683,0.857	0.942,1.0	-0.201
33630	ENSG00000068745.15	IP6K2	chr3	-	48711366	48711459	48695089	48695418	48717156	48717188	33630	16,12	178,124	2,0	72,91	193	100	0.000122869853366	0.00431901461895	0.045,0.048	0.014,0.0	0.04
45604	ENSG00000135541.22	AHI1	chr6	-	135495538	135495709	135492227	135492291	135497187	135497249	45604	6,3	9,2	0,0	3,4	271	100	0.000123212136259	0.00432741282255	0.197,0.356	0.0,0.0	0.276
57078	ENSG00000124275.15	MTRR	chr5	+	7873372	7873526	7870769	7870923	7875257	7875310	57078	279,260	55,70	147,121	61,101	254	100	0.000124454787207	0.00436739284696	0.666,0.594	0.487,0.32	0.227
5554	ENSG00000105173.14	CCNE1	chr19	+	29812531	29812578	29811990	29812152	29812688	29812776	5554	62,59	4,7	58,15	0,0	147	100	0.000126472513264	0.00442729770277	0.913,0.851	1.0,1.0	-0.118
45781	ENSG00000285756.2	ENSG00000285756	chrX	-	3818656	3818703	3818441	3818500	3825087	3825231	45781	2,3	2,2	2,2	0,0	147	100	0.000126479112684	0.00442729770277	0.405,0.505	1.0,1.0	-0.545
58319	ENSG00000023839.12	ABCC2	chr10	+	99796390	99796853	99794412	99794468	99797096	99797331	58319	599,591	264,289	837,1056	163,329	563	100	0.000126293670119	0.00442729770277	0.287,0.266	0.477,0.363	-0.144
15195	ENSG00000113552.16	GNPDA1	chr5	-	142012287	142012377	142011911	142012041	142012668	142012973	15195	10,8	2,3	2,3	0,0	190	100	0.00012687912463	0.00443758943411	0.725,0.584	1.0,1.0	-0.346
42109	ENSG00000164828.18	SUN1	chr7	+	832504	832601	816614	816673	838797	838986	42109	101,129	17,11	67,69	2,1	197	100	0.000127201710175	0.00444515826083	0.751,0.856	0.944,0.972	-0.154
28380	ENSG00000196781.16	TLE1	chr9	-	81634096	81634301	81620440	81620557	81652183	81652288	28380	54,42	10,1	24,7	0,0	305	100	0.000128267470195	0.00447866358608	0.639,0.932	1.0,1.0	-0.214
52736	ENSG00000104472.10	CHRAC1	chr8	+	140514368	140514495	140511321	140511646	140515125	140515765	52736	276,210	19,27	295,426	8,16	227	100	0.000128600493803	0.00448654972755	0.865,0.774	0.942,0.921	-0.112
20711	ENSG00000115137.12	DNAJC27	chr2	-	24953549	24953635	24951393	24951554	24957042	24957165	20711	6,5	0,2	0,7	8,14	186	100	0.000128709282599	0.00448660625812	1.0,0.573	0.0,0.212	0.68
2058	ENSG00000100068.14	LRP5L	chr22	-	25357254	25357426	25354595	25354812	25359826	25360189	2058	27,27	4,2	31,10	0,0	272	100	0.000129249931779	0.00450021333843	0.713,0.832	1.0,1.0	-0.228
56214	ENSG00000152465.18	NMT2	chr10	-	15140986	15141029	15135273	15135418	15141421	15141557	56214	17,22	20,24	8,6	23,41	143	100	0.000129314621907	0.00450021333843	0.373,0.391	0.196,0.093	0.237
54819	ENSG00000105662.16	CRTC1	chr19	+	18774899	18774986	18771441	18771546	18775640	18775821	54819	27,24	6,3	7,2	0,0	187	100	0.000129551524491	0.00450471310035	0.706,0.811	1.0,1.0	-0.242
75157	ENSG00000123219.13	CENPK	chr5	-	65562802	65563008	65561115	65561564	65563097	65563123	75157	0,2	25,48	13,0	14,16	306	100	0.00013011671902	0.004520611155	0.0,0.013	0.233,0.0	-0.11
23841	ENSG00000153208.18	MERTK	chr2	+	112019412	112019522	112009947	112010066	112021421	112021581	23841	103,122	0,2	94,94	6,7	210	100	0.000130589289097	0.00452951167195	1.0,0.967	0.882,0.865	0.11
36806	ENSG00000058056.10	USP13	chr3	+	179681877	179682003	179653031	179653393	179706933	179707076	36806	58,49	0,0	50,43	0,13	226	100	0.000130543204894	0.00452951167195	1.0,1.0	1.0,0.594	0.203
1568	ENSG00000100372.15	SLC25A17	chr22	-	40792524	40792676	40779008	40779125	40819194	40819350	1568	28,21	2,4	12,12	0,0	252	100	0.000130973730199	0.0045390854427	0.847,0.676	1.0,1.0	-0.238
20565	ENSG00000163660.12	CCNL1	chr3	-	157151728	157151930	157150281	157150381	157152176	157152241	20565	56,45	47,38	18,17	34,45	302	100	0.000131341401649	0.00454806267993	0.283,0.282	0.149,0.111	0.152
26793	ENSG00000171469.11	ZNF561	chr19	-	9620915	9620963	9619431	9619582	9621161	9621222	26793	7,4	11,7	0,0	2,1	148	100	0.000131473685873	0.00454888087527	0.301,0.279	0.0,0.0	0.29
46429	ENSG00000197081.16	IGF2R	chr6	+	160068844	160069014	160068248	160068385	160069867	160070058	46429	7,2	98,85	12,3	35,16	270	100	0.000133200039007	0.00460480564247	0.026,0.009	0.113,0.065	-0.071
54499	ENSG00000130958.13	SLC35D2	chr9	-	96321997	96322080	96320709	96321341	96324090	96324169	54499	886,1179	63,64	750,1201	33,26	183	100	0.000133343958879	0.0046059775895	0.885,0.91	0.925,0.962	-0.046
45624	ENSG00000235823.5	OLMALINC	chr10	+	100380982	100381109	100373512	100374012	100381215	100381448	45624	286,292	36,44	241,322	9,24	227	100	0.000133744164086	0.00461599293443	0.778,0.745	0.922,0.855	-0.127
486	ENSG00000133142.19	TCEAL4	chrX	+	103585858	103586107	103585522	103585624	103586218	103586291	486	17,37	226,284	19,17	77,43	349	100	0.000134220582329	0.00462861999934	0.021,0.036	0.066,0.102	-0.055
5489	ENSG00000089351.15	GRAMD1A	chr19	+	35013255	35013368	35011473	35011554	35013540	35013691	5489	117,53	17,20	201,50	7,5	213	100	0.000134815005002	0.00464306980535	0.764,0.554	0.931,0.824	-0.218
9084	ENSG00000112339.15	HBS1L	chr6	-	135037810	135038026	135002620	135002842	135039572	135039767	9084	25,19	90,48	15,15	154,115	316	100	0.000134895905892	0.00464306980535	0.081,0.111	0.03,0.04	0.061
29344	ENSG00000112337.11	SLC17A2	chr6	-	25915735	25915868	25914579	25914670	25916684	25916846	29344	28,22	2,4	14,18	0,0	233	100	0.000134972314657	0.00464306980535	0.857,0.702	1.0,1.0	-0.221
37533	ENSG00000196476.12	C20orf96	chr20	-	289558	289676	283962	284081	290258	290307	37533	278,305	20,31	57,105	1,2	218	100	0.000135169086576	0.00464602119007	0.864,0.819	0.963,0.96	-0.12
28973	ENSG00000187583.11	PLEKHN1	chr1	+	973185	973326	972860	973010	973499	973640	28973	26,24	4,3	8,11	0,0	241	100	0.000136131013827	0.00466966650409	0.73,0.768	1.0,1.0	-0.251
40241	ENSG00000129566.13	TEP1	chr14	-	20406232	20406400	20405450	20405585	20407872	20408463	40241	27,46	3,7	43,24	0,1	268	100	0.000136191635053	0.00466966650409	0.771,0.71	1.0,0.9	-0.21
50169	ENSG00000168003.19	SLC3A2	chr11	+	62870744	62870837	62856101	62856381	62871576	62871669	50169	79,53	27,26	83,17	7,3	193	100	0.000136129629618	0.00466966650409	0.603,0.514	0.86,0.746	-0.244
45565	ENSG00000148356.15	LRSAM1	chr9	+	127495319	127495414	127492801	127492897	127495963	127496095	45565	19,17	4,2	13,16	0,0	195	100	0.000136740643524	0.00468465387981	0.709,0.813	1.0,1.0	-0.239
63494	ENSG00000183401.12	CCDC159	chr19	+	11352056	11352133	11350117	11350199	11353450	11353572	63494	23,14	5,1	18,22	0,0	177	100	0.000137582578528	0.00470964403113	0.722,0.888	1.0,1.0	-0.195
45099	ENSG00000115414.21	FN1	chr2	-	215380810	215381080	215379129	215379317	215382211	215382325	45099	38599,51098	5024,6609	15853,15333	2938,4798	370	100	0.000137968421106	0.00471899342288	0.675,0.676	0.593,0.463	0.147
29045	ENSG00000047849.22	MAP4	chr3	-	47977864	47977933	47928227	47928350	47998637	47998879	29045	345,264	0,0	239,279	5,10	169	100	0.000138972093644	0.00474944220441	1.0,1.0	0.966,0.943	0.046
75636	ENSG00000125409.13	TEKT3	chr17	-	15319076	15319147	15314086	15314230	15327991	15328075	75636	2,3	1,3	0,0	2,2	171	100	0.00013913972148	0.00475129236522	0.539,0.369	0.0,0.0	0.454
65411	ENSG00000124209.4	RAB22A	chr20	+	58343717	58343799	58311042	58311122	58353272	58353344	65411	254,232	0,2	263,364	4,16	182	100	0.000139994552614	0.00477658675239	1.0,0.985	0.973,0.926	0.043
30990	ENSG00000101391.21	CDK5RAP1	chr20	-	33395012	33395116	33394031	33394066	33401427	33401505	30990	60,44	8,1	57,34	0,0	204	100	0.000142935327846	0.00487295399045	0.786,0.956	1.0,1.0	-0.129
12687	ENSG00000169696.16	ASPSCR1	chr17	+	82015074	82015356	82012230	82012283	82016475	82016527	12687	92,65	244,225	24,10	93,136	382	100	0.000144949382283	0.00492957423987	0.09,0.07	0.063,0.019	0.039
25879	ENSG00000156976.17	EIF4A2	chr3	+	186788309	186788420	186787802	186787882	186789124	186789291	25879	1163,1339	683,753	607,934	1125,766	211	100	0.000144723043337	0.00492957423987	0.447,0.457	0.204,0.366	0.167
47447	ENSG00000135250.17	SRPK2	chr7	-	105297420	105297533	105268805	105268869	105388647	105388702	47447	5,6	6,12	0,0	4,2	213	100	0.000144880084629	0.00492957423987	0.281,0.19	0.0,0.0	0.236
13514	ENSG00000112245.13	PTP4A1	chr6	+	63532336	63532530	63527818	63528084	63550299	63550493	13514	121,161	40,62	28,52	4,1	294	100	0.00014515572617	0.00493258480203	0.507,0.469	0.704,0.946	-0.337
3730	ENSG00000101294.18	HM13	chr20	+	31568077	31568280	31561633	31561736	31569119	31569541	3730	14,9	12,15	1,1	4,14	303	100	0.000145805292442	0.00493592651855	0.278,0.165	0.076,0.023	0.172
12755	ENSG00000072364.13	AFF4	chr5	-	132927120	132927207	132904367	132904404	132932177	132932222	12755	301,245	8,6	119,355	9,30	187	100	0.000145832321148	0.00493592651855	0.953,0.956	0.876,0.864	0.084
35649	ENSG00000204138.13	PHACTR4	chr1	+	28457831	28457855	28407409	28407463	28459084	28459258	35649	21,25	53,68	3,2	26,32	124	100	0.000145874527488	0.00493592651855	0.242,0.229	0.085,0.048	0.169
42518	ENSG00000163681.16	SLMAP	chr3	+	57925844	57925934	57922888	57923023	57927295	57927393	42518	242,148	2,1	146,219	8,9	190	100	0.000145559222426	0.00493592651855	0.985,0.987	0.906,0.928	0.069
42780	ENSG00000118482.12	PHF3	chr6	+	63646526	63646795	63635801	63636150	63691736	63692043	42780	53,48	4,4	22,8	0,0	369	100	0.000145817918637	0.00493592651855	0.782,0.765	1.0,1.0	-0.226
73188	ENSG00000258867.8	LINC01146	chr14	+	88084036	88084155	88024543	88024669	88096498	88096583	73188	52,36	50,55	43,52	15,26	219	100	0.000145961472112	0.00493592651855	0.322,0.23	0.567,0.477	-0.246
18683	ENSG00000075711.21	DLG1	chr3	-	197104902	197105005	197090911	197091026	197115926	197116083	18683	231,303	1,3	124,349	10,9	203	100	0.000146369485497	0.00494344478363	0.991,0.98	0.859,0.95	0.081
36552	ENSG00000090905.19	TNRC6A	chr16	+	24795906	24795939	24794543	24794719	24797489	24797503	36552	191,184	25,17	171,177	6,6	133	100	0.000146419957762	0.00494344478363	0.852,0.891	0.955,0.957	-0.085
18553	ENSG00000127419.17	TMEM175	chr4	+	947708	948154	932474	932540	950420	950491	18553	28,32	1,4	7,8	0,0	546	100	0.000146887650182	0.00495147855891	0.837,0.594	1.0,1.0	-0.284
30145	ENSG00000173209.23	AHSA2P	chr2	+	61183546	61183662	61181319	61181405	61184711	61184800	30145	161,155	256,198	146,108	312,314	216	100	0.000146894455277	0.00495147855891	0.226,0.266	0.178,0.137	0.088
47311	ENSG00000223797.8	ENTPD3-AS1	chr3	-	40451704	40451782	40446545	40446843	40453121	40453174	47311	5,12	0,0	8,9	3,2	178	100	0.000147167726686	0.00495669901666	1.0,1.0	0.6,0.717	0.342
69606	ENSG00000029364.12	SLC39A9	chr14	+	69441831	69441972	69424093	69424202	69442068	69442266	69606	7,5	194,222	7,17	60,149	241	100	0.00014903292508	0.00501548505504	0.015,0.009	0.046,0.045	-0.034
6698	ENSG00000130396.22	AFDN	chr6	+	167872213	167872377	167870382	167870498	167875334	167875495	6698	794,768	1,4	799,955	17,10	264	100	0.00015034301558	0.00505551031908	0.997,0.986	0.947,0.973	0.032
54922	ENSG00000136861.19	CDK5RAP2	chr9	-	120470110	120470220	120467859	120467997	120471747	120471878	54922	113,122	3,7	63,108	10,18	210	100	0.000150918693452	0.00507079542646	0.947,0.892	0.75,0.741	0.174
69444	ENSG00000173588.16	CEP83	chr12	-	94328204	94328308	94312913	94313017	94331699	94331829	69444	2,14	20,35	0,2	31,24	204	100	0.000151337842025	0.00508080092733	0.047,0.164	0.0,0.039	0.086
65017	ENSG00000123349.15	PFDN5	chr12	+	53296429	53296551	53295524	53295639	53297849	53297924	65017	21,25	96,82	5,5	70,63	222	100	0.000151500112247	0.00508217323656	0.09,0.121	0.031,0.035	0.072
32435	ENSG00000087157.19	PGS1	chr17	+	78400734	78400855	78399347	78399537	78403567	78404089	32435	50,44	4,5	29,13	0,0	221	100	0.000151813327593	0.00508860285002	0.85,0.799	1.0,1.0	-0.175
34614	ENSG00000159674.12	SPON2	chr4	-	1201268	1201462	1199027	1200047	1204981	1205088	34614	16,15	4,1	15,6	0,0	294	100	0.000152691466765	0.00511394260489	0.576,0.836	1.0,1.0	-0.294
3097	ENSG00000259723.1	ENSG00000259723	chr20	-	53461468	53461568	53455255	53455440	53504108	53504314	3097	3,3	1,8	8,2	1,0	200	100	0.000153136569561	0.00512475018759	0.6,0.158	0.8,1.0	-0.521
32700	ENSG00000154222.15	CC2D1B	chr1	-	52357000	52357174	52356383	52356442	52357525	52357698	32700	36,33	7,1	17,6	0,0	274	100	0.000153581187821	0.00513552430362	0.652,0.923	1.0,1.0	-0.212
61423	ENSG00000171703.17	TCEA2	chr20	+	64066914	64067020	64065549	64066538	64068046	64068134	61423	34,25	5,2	20,16	0,0	206	100	0.000154456071496	0.00516065716934	0.767,0.859	1.0,1.0	-0.187
32012	ENSG00000088298.13	EDEM2	chr20	-	35118597	35118719	35115363	35115933	35123889	35124034	32012	329,230	11,3	426,486	1,1	222	100	0.000155119891793	0.00517870356452	0.931,0.972	0.995,0.995	-0.043
682	ENSG00000169562.13	GJB1	chrX	+	71223186	71223335	71215233	71215290	71223691	71225202	682	2,8	114,95	13,9	58,47	249	100	0.000155946970197	0.00520216725681	0.007,0.033	0.083,0.071	-0.057
16932	ENSG00000169288.18	MRPL1	chr4	+	77906945	77907210	77894138	77894250	77909265	77909312	16932	25,18	68,65	18,11	152,106	365	100	0.000156755750226	0.00522498366498	0.092,0.071	0.031,0.028	0.052
50486	ENSG00000143952.20	VPS54	chr2	-	63913824	63913925	63913222	63913310	63914181	63914287	50486	3,8	13,14	1,0	13,16	201	100	0.000157335093287	0.00524012225971	0.103,0.221	0.037,0.0	0.144
33558	ENSG00000186205.14	MTARC1	chr1	+	220798151	220798275	220797873	220798065	220805051	220805113	33558	2,0	8,4	4,3	1,1	224	100	0.000160440248767	0.00533929333436	0.1,0.0	0.641,0.573	-0.557
64834	ENSG00000050426.16	LETMD1	chr12	+	51053777	51053860	51052087	51052207	51056349	51056428	64834	25,33	17,24	27,22	5,3	183	100	0.000162128433144	0.00539118892262	0.446,0.429	0.747,0.8	-0.336
17591	ENSG00000109390.13	NDUFC1	chr4	-	139297384	139297443	139295731	139295960	139302415	139302477	17591	6,2	10,0	0,0	8,2	159	100	0.000162651743341	0.00540429780553	0.274,1.0	0.0,0.0	0.637
41237	ENSG00000111271.15	ACAD10	chr12	+	111746143	111746284	111744570	111745043	111747048	111747186	41237	101,61	0,1	42,52	2,6	241	100	0.000163788474063	0.00543775136134	1.0,0.962	0.897,0.782	0.141
50228	ENSG00000173889.16	PHC3	chr3	-	170136418	170136665	170128683	170129552	170145422	170145521	50228	169,240	4,8	76,164	0,0	347	100	0.000164520698893	0.00545773301042	0.924,0.896	1.0,1.0	-0.09
13818	ENSG00000112851.16	ERBIN	chr5	+	66068876	66069020	66053405	66054951	66076315	66076408	13818	10,6	14,15	1,0	7,9	244	100	0.00016490375734	0.00546610910613	0.226,0.141	0.055,0.0	0.156
1993	ENSG00000235954.9	TTC28-AS1	chr22	+	27922017	27922178	27919403	27919545	27935150	27935230	1993	44,49	0,13	49,33	0,0	261	100	0.000165909177012	0.00549233460528	1.0,0.591	1.0,1.0	-0.205
19851	ENSG00000163029.16	SMC6	chr2	-	17726388	17726469	17725256	17725358	17731077	17731139	19851	411,487	10,9	381,919	0,3	181	100	0.000165995855075	0.00549233460528	0.958,0.968	1.0,0.994	-0.034
57776	ENSG00000107771.17	CCSER2	chr10	+	84499874	84499959	84477574	84477664	84513448	84518517	57776	25,10	163,198	2,2	57,130	185	100	0.000166219704882	0.00549233460528	0.077,0.027	0.019,0.008	0.038
74695	ENSG00000103091.15	WDR59	chr16	-	74887682	74887755	74886269	74886396	74892483	74892565	74695	200,173	10,6	124,56	0,0	173	100	0.000166180410824	0.00549233460528	0.92,0.943	1.0,1.0	-0.069
31057	ENSG00000171298.13	GAA	chr17	+	80101810	80101890	80101593	80101625	80104554	80105132	31057	60,34	11,3	12,5	0,0	180	100	0.000166616693683	0.00549244715042	0.752,0.863	1.0,1.0	-0.193
47545	ENSG00000160799.12	CCDC12	chr3	-	46965983	46966129	46940997	46941065	46976352	46976483	47545	12,4	18,26	0,0	11,4	246	100	0.000166439834896	0.00549244715042	0.213,0.059	0.0,0.0	0.136
50372	ENSG00000136522.14	MRPL47	chr3	-	179602651	179602797	179601729	179601790	179604526	179604638	50372	284,302	7,8	257,152	0,0	246	100	0.000166579891933	0.00549244715042	0.943,0.939	1.0,1.0	-0.059
53887	ENSG00000204852.17	TCTN1	chr12	+	110644966	110645129	110641023	110641149	110647210	110647336	53887	42,54	2,8	21,2	0,0	263	100	0.000166947487034	0.00549902167166	0.889,0.72	1.0,1.0	-0.196
5404	ENSG00000161265.15	U2AF1L4	chr19	-	35743154	35743345	35742530	35742803	35743808	35743904	5404	9,5	17,16	0,0	8,5	291	100	0.000167571142294	0.00551522474225	0.154,0.097	0.0,0.0	0.126
1519	ENSG00000100138.15	SNU13	chr22	-	41687721	41688327	41680243	41680364	41688793	41688799	1519	20,2	197,220	12,18	116,31	706	100	0.000168173810591	0.00553071216056	0.014,0.001	0.014,0.076	-0.037
1995	ENSG00000235954.9	TTC28-AS1	chr22	+	27922017	27922227	27919497	27919545	27935150	27935230	1995	49,50	0,13	65,37	0,0	310	100	0.000168911557294	0.00555061408643	1.0,0.554	1.0,1.0	-0.223
1440	ENSG00000100373.10	UPK3A	chr22	+	45287171	45287451	45285940	45286096	45293180	45293313	1440	58,54	1,0	32,18	2,4	380	100	0.000169512204662	0.00556243505965	0.939,1.0	0.808,0.542	0.294
58213	ENSG00000110888.19	CAPRIN2	chr12	-	30715453	30715503	30714958	30715141	30716507	30716676	58213	0,2	72,70	1,10	11,62	150	100	0.000169537015075	0.00556243505965	0.0,0.019	0.057,0.097	-0.068
29024	ENSG00000151665.13	PIGF	chr2	-	46588074	46588179	46581284	46581591	46592474	46592583	29024	34,30	108,87	68,58	93,84	205	100	0.00017043252737	0.00558306553861	0.133,0.144	0.263,0.252	-0.119
30221	ENSG00000204843.13	DCTN1	chr2	-	74390582	74390728	74377999	74378245	74391793	74391843	30221	8,7	162,124	10,7	54,9	246	100	0.000170303224627	0.00558306553861	0.02,0.022	0.07,0.24	-0.134
1975	ENSG00000183765.23	CHEK2	chr22	-	28719394	28719485	28711908	28712017	28724976	28725124	1975	113,164	0,1	94,150	10,2	191	100	0.000172181127996	0.00563095796135	1.0,0.988	0.831,0.975	0.091
30791	ENSG00000228649.11	SNHG26	chr7	+	22858570	22858795	22856972	22857016	22860546	22860638	30791	10,0	10,5	0,0	19,4	325	100	0.000172298032927	0.00563095796135	0.235,0.0	0.0,0.0	0.117
56534	ENSG00000148737.17	TCF7L2	chr10	+	113089399	113089540	113040024	113040126	113141183	113141316	56534	44,69	259,434	25,55	103,126	241	100	0.000172083442673	0.00563095796135	0.066,0.062	0.091,0.153	-0.058
50609	ENSG00000113916.18	BCL6	chr3	-	187726730	187726898	187725498	187725629	187728359	187728544	50609	929,1005	65,51	376,559	14,10	268	100	0.000172927977817	0.00564713712271	0.842,0.88	0.909,0.954	-0.071
49395	ENSG00000163870.16	TPRA1	chr3	-	127575748	127575809	127575402	127575505	127575939	127576050	49395	47,30	3,7	28,4	0,0	161	100	0.000173333436324	0.00565596594833	0.907,0.727	1.0,1.0	-0.183
49347	ENSG00000137210.14	TMEM14B	chr6	+	10755141	10755232	10747758	10747881	10770076	10770204	49347	6,2	3,1	4,2	0,0	191	100	0.00017379788008	0.0056667042442	0.512,0.512	1.0,1.0	-0.488
36464	ENSG00000116212.15	LRRC42	chr1	+	53947861	53947981	53946357	53946549	53951985	53952472	36464	28,26	30,13	27,12	4,1	220	100	0.000174220286136	0.00567164251873	0.298,0.476	0.754,0.845	-0.412
44344	ENSG00000196141.14	SPATS2L	chr2	+	200372108	200372251	200329430	200329480	200389222	200389283	44344	1,4	181,146	4,14	87,86	243	100	0.000174143567219	0.00567164251873	0.002,0.011	0.019,0.063	-0.035
12486	ENSG00000133226.18	SRRM1	chr1	+	24647078	24647208	24646666	24646789	24648858	24649029	12486	87,67	181,119	81,46	226,242	230	100	0.000174921390749	0.00568864360285	0.173,0.197	0.135,0.076	0.079
47618	ENSG00000184162.15	NR2C2AP	chr19	-	19202469	19202575	19202057	19202398	19202790	19202881	47618	37,33	0,0	20,1	6,0	206	100	0.000175014283064	0.00568864360285	1.0,1.0	0.618,1.0	0.191
3192	ENSG00000124214.21	STAU1	chr20	-	49174194	49174269	49153932	49154071	49188115	49188334	3192	299,314	28,20	302,316	12,5	175	100	0.000175540101204	0.00569261041727	0.859,0.9	0.935,0.973	-0.075
24140	ENSG00000204385.13	SLC44A4	chr6	-	31865009	31865080	31864815	31864910	31865314	31865388	24140	30,18	7,1	12,6	0,0	171	100	0.000175544250536	0.00569261041727	0.715,0.913	1.0,1.0	-0.186
54310	ENSG00000196305.19	IARS1	chr9	-	92290835	92290922	92289300	92289426	92293610	92293693	54310	1,1	32,46	4,3	5,10	187	100	0.000175336205793	0.00569261041727	0.016,0.011	0.3,0.138	-0.205
71492	ENSG00000106258.15	CYP3A5	chr7	-	99671770	99671878	99666951	99667065	99672579	99672679	71492	12,7	1,5	0,4	16,6	208	100	0.000175716943346	0.00569380018048	0.852,0.402	0.0,0.243	0.506
14448	ENSG00000176783.15	RUFY1	chr5	+	179580946	179581012	179577074	179577136	179585795	179585865	14448	129,75	2,9	85,107	0,0	166	100	0.000176587857322	0.00571403027698	0.975,0.834	1.0,1.0	-0.096
74712	ENSG00000186187.12	ZNRF1	chr16	+	75084428	75084637	74999344	75000095	75093571	75093667	74712	5,18	76,47	2,2	65,49	309	100	0.000176614240497	0.00571403027698	0.021,0.11	0.01,0.013	0.054
7416	ENSG00000105792.19	CFAP69	chr7	+	90303968	90304106	90299866	90300059	90304743	90304753	7416	25,18	3,2	10,7	7,7	238	100	0.000177004098949	0.00572222131467	0.778,0.791	0.375,0.296	0.449
68421	ENSG00000156222.12	SLC28A1	chr15	+	84886671	84886787	84884653	84884751	84887744	84887856	68421	8,13	2,6	7,6	14,20	216	100	0.000177395101032	0.00573043665486	0.649,0.501	0.188,0.122	0.42
255	ENSG00000010404.18	IDS	chrX	-	149502074	149502177	149500948	149501037	149503311	149503489	255	2,0	22,11	10,2	12,7	203	100	0.000179061722569	0.00577981419842	0.043,0.0	0.291,0.123	-0.185
26652	ENSG00000138640.15	FAM13A	chr4	-	88805010	88805052	88790585	88790627	88822975	88823201	26652	7,10	0,1	6,15	3,7	142	100	0.000179507544237	0.00578974063134	1.0,0.876	0.585,0.601	0.345
25972	ENSG00000081051.8	AFP	chr4	+	73455235	73455290	73453764	73453897	73455630	73455741	25972	45791,45370	476,417	37313,39363	158,120	155	100	0.000180683822686	0.00582319340781	0.984,0.986	0.993,0.995	-0.009
3307	ENSG00000101104.13	PABPC1L	chr20	+	44938673	44938748	44938044	44938191	44958336	44958952	3307	35,33	30,9	88,31	2,6	175	100	0.000181275245584	0.00583776012029	0.4,0.677	0.962,0.747	-0.316
39083	ENSG00000174483.20	BBS1	chr11	+	66511204	66511239	66510633	66511089	66514405	66514498	39083	12,15	7,1	1,2	0,0	135	100	0.000181572469413	0.00584283738046	0.559,0.917	1.0,1.0	-0.262
61746	ENSG00000085733.16	CTTN	chr11	+	70421469	70421580	70420399	70420510	70422939	70422995	61746	636,546	82,83	443,500	23,46	211	100	0.000182602262741	0.00587146215795	0.786,0.757	0.901,0.837	-0.097
68444	ENSG00000095637.23	SORBS1	chr10	-	95414493	95414655	95410632	95410777	95421960	95422073	68444	69,102	24,24	95,138	63,91	262	100	0.00018525660965	0.00595223941903	0.523,0.619	0.365,0.367	0.205
30264	ENSG00000113734.18	BNIP1	chr5	+	173151565	173151694	173146865	173146958	173154321	173154413	30264	4,8	15,25	0,0	14,7	229	100	0.000185758867018	0.00596379982186	0.104,0.123	0.0,0.0	0.113
24483	ENSG00000068120.15	COASY	chr17	+	42564708	42564898	42563306	42564577	42564982	42565047	24483	739,669	11,9	904,451	2,0	290	100	0.000186721495549	0.00599011142618	0.959,0.962	0.994,1.0	-0.037
16913	ENSG00000197694.18	SPTAN1	chr9	+	128592982	128593042	128591476	128591625	128594174	128594373	16913	62,72	75,59	126,93	24,46	160	100	0.000187121803125	0.00599835703509	0.341,0.433	0.766,0.558	-0.275
20652	ENSG00000121749.16	TBC1D15	chr12	+	71907862	71907989	71907021	71907138	71913825	71913926	20652	6,6	35,20	16,16	19,16	227	100	0.000187869193885	0.00601741957473	0.07,0.117	0.271,0.306	-0.195
48048	ENSG00000156521.14	TYSND1	chr10	-	70143841	70143972	70137980	70140141	70145420	70146700	48048	17,10	2,3	23,9	0,0	231	100	0.000188003936552	0.00601741957473	0.786,0.591	1.0,1.0	-0.311
38367	ENSG00000022277.13	RTF2	chr20	+	56472325	56472415	56471613	56471669	56473300	56473360	38367	10,28	1,0	39,45	7,9	190	100	0.000188204050777	0.00601922275461	0.84,1.0	0.746,0.725	0.184
11551	ENSG00000164056.11	SPRY1	chr4	+	123397610	123397856	123396794	123396932	123401536	123401793	11551	228,166	0,0	220,115	10,0	346	100	0.000188900820384	0.00603689530181	1.0,1.0	0.864,1.0	0.068
24321	ENSG00000178904.19	DPY19L3	chr19	+	32468730	32468813	32464727	32464784	32477521	32477654	24321	30,37	0,0	38,12	1,6	183	100	0.000189428028754	0.00604912618138	1.0,1.0	0.954,0.522	0.262
30709	ENSG00000054282.16	SDCCAG8	chr1	+	243293398	243293494	243293090	243293219	243304712	243304777	30709	7,6	8,7	0,2	10,10	196	100	0.000190498392984	0.00607740567628	0.309,0.304	0.0,0.093	0.26
54502	ENSG00000285269.2	ENSG00000285269	chr9	-	96343903	96343996	96324090	96324169	96351102	96351171	54502	10,9	9,6	4,7	1,0	193	100	0.00019060393295	0.00607740567628	0.365,0.437	0.675,1.0	-0.436
7792	ENSG00000146729.10	NIPSNAP2	chr7	+	55982209	55982280	55978906	55981567	55983727	55983812	7792	109,154	6,6	161,173	1,0	171	100	0.000192437460382	0.0061196207673	0.914,0.938	0.989,1.0	-0.069
40998	ENSG00000113163.19	CERT1	chr5	-	75399309	75399387	75389591	75389687	75400204	75400297	40998	6,16	54,69	0,2	43,26	178	100	0.000192453055208	0.0061196207673	0.059,0.115	0.0,0.041	0.066
68691	ENSG00000117419.16	ERI3	chr1	-	44247938	44248038	44221069	44221640	44284834	44284907	68691	136,99	2,11	66,52	0,0	200	100	0.000192342006498	0.0061196207673	0.971,0.818	1.0,1.0	-0.106
69079	ENSG00000151332.20	MBIP	chr14	-	36308091	36308189	36300784	36300823	36311572	36311590	69079	286,255	14,4	204,231	2,0	198	100	0.000192512613174	0.0061196207673	0.912,0.97	0.981,1.0	-0.049
27251	ENSG00000079150.19	FKBP7	chr2	-	178477061	178477213	178465762	178469785	178478278	178478317	27251	206,195	26,22	113,141	36,34	252	100	0.000193007249912	0.0061306893153	0.759,0.779	0.555,0.622	0.18
68217	ENSG00000134884.15	ARGLU1	chr13	-	106557558	106557616	106557047	106557131	106559431	106559657	68217	9,14	284,296	12,22	112,172	158	100	0.000193445712168	0.00613995810456	0.02,0.029	0.064,0.075	-0.045
4137	ENSG00000088836.14	SLC4A11	chr20	-	3230731	3230845	3230514	3230647	3230932	3231058	4137	21,15	4,2	15,15	0,0	214	100	0.000193871055234	0.00614879676316	0.71,0.778	1.0,1.0	-0.256
16887	ENSG00000122126.18	OCRL	chrX	+	129553235	129554446	129548562	129548601	129557324	129557435	16887	193,164	53,76	133,110	13,19	1311	100	0.000194153587218	0.00615309608545	0.217,0.141	0.438,0.306	-0.193
8508	ENSG00000184988.8	TMEM106A	chr17	+	43212226	43212394	43211874	43211922	43213020	43213045	8508	70,80	4,5	48,49	0,0	268	100	0.000195824207731	0.00620134679021	0.867,0.857	1.0,1.0	-0.138
961	ENSG00000102317.18	RBM3	chrX	+	48575921	48576083	48575560	48575667	48576313	48576419	961	94,120	173,148	54,57	38,41	262	100	0.000196330586965	0.00621268331314	0.172,0.236	0.352,0.347	-0.145
19164	ENSG00000003509.16	NDUFAF7	chr2	+	37242634	37242693	37241577	37241637	37243862	37243973	19164	7,4	8,9	12,8	3,0	159	100	0.000198295004324	0.0062653738536	0.355,0.218	0.716,1.0	-0.572
30993	ENSG00000101391.21	CDK5RAP1	chr20	-	33396760	33397084	33394031	33394066	33401427	33401519	30993	107,70	8,1	72,18	0,0	424	100	0.000198196737177	0.0062653738536	0.759,0.943	1.0,1.0	-0.149
44777	ENSG00000187889.13	FYB2	chr1	-	56737086	56737147	56726496	56726583	56740696	56740795	44777	1,3	2,3	7,3	0,1	161	100	0.000199239740415	0.00628573604557	0.237,0.383	1.0,0.651	-0.516
61994	ENSG00000133943.21	DGLUCY	chr14	+	91223678	91223795	91215404	91215793	91224683	91224822	61994	6,4	2,2	21,3	0,0	217	100	0.000199196571055	0.00628573604557	0.58,0.48	1.0,1.0	-0.47
47796	ENSG00000173402.13	DAG1	chr3	+	49488625	49488745	49470276	49470433	49510418	49510819	47796	6,0	22,12	11,4	8,3	220	100	0.000199969171579	0.00630399801819	0.11,0.0	0.385,0.377	-0.326
18653	ENSG00000214135.10	SDHAP4	chr3	-	197624471	197624720	197624111	197624197	197627779	197627842	18653	8,11	53,23	28,46	35,9	349	100	0.000200330779718	0.00631064566809	0.041,0.121	0.186,0.594	-0.309
11063	ENSG00000243406.6	MRPS31P5	chr13	-	52183975	52184114	52180581	52180654	52186682	52186823	11063	127,131	1,0	113,103	10,1	239	100	0.000200821481855	0.00632134687057	0.982,1.0	0.825,0.977	0.09
43021	ENSG00000182389.20	CACNB4	chr2	-	151869176	151869735	151860710	151860820	151870530	151870611	43021	10,6	2,7	7,13	0,1	659	100	0.000201032528099	0.00632323575422	0.431,0.115	1.0,0.664	-0.559
35567	ENSG00000288701.1	PRRC2B	chr9	+	131446400	131446642	131444184	131444328	131447084	131447206	35567	303,278	13,4	202,104	1,0	342	100	0.000202505123784	0.00636477252794	0.872,0.953	0.983,1.0	-0.079
47859	ENSG00000165097.16	KDM1B	chr6	+	18162834	18162924	18161326	18161454	18166266	18166378	47859	29,25	0,0	40,39	6,2	190	100	0.000202794249071	0.00636907819757	1.0,1.0	0.778,0.911	0.155
26836	ENSG00000169180.12	XPO6	chr16	-	28180940	28181031	28177219	28177332	28211365	28211965	26836	162,176	12,9	129,129	3,0	191	100	0.000203696918764	0.00638018042907	0.876,0.911	0.957,1.0	-0.085
27074	ENSG00000103485.19	QPRT	chr16	+	29694663	29694755	29679181	29679210	29696995	29697127	27074	55,16	7,2	17,4	0,0	192	100	0.000203854265449	0.00638018042907	0.804,0.806	1.0,1.0	-0.195
31083	ENSG00000142945.13	KIF2C	chr1	+	44753131	44753254	44750441	44750564	44753732	44753833	31083	285,288	26,14	211,267	6,4	223	100	0.000203817176872	0.00638018042907	0.831,0.902	0.94,0.968	-0.087
49338	ENSG00000137210.14	TMEM14B	chr6	+	10749621	10749698	10747772	10747881	10770076	10770204	49338	6,2	3,1	6,2	0,0	177	100	0.00020374297095	0.00638018042907	0.531,0.531	1.0,1.0	-0.469
68522	ENSG00000129484.14	PARP2	chr14	+	20357395	20357520	20357050	20357149	20357637	20357904	68522	132,87	3,7	139,52	0,0	225	100	0.000203909743559	0.00638018042907	0.951,0.847	1.0,1.0	-0.101
36764	ENSG00000078487.18	ZCWPW1	chr7	-	100405012	100405093	100404177	100404244	100406693	100406798	36764	39,39	3,6	13,20	0,0	181	100	0.000205021076314	0.00640654590224	0.878,0.782	1.0,1.0	-0.17
58471	ENSG00000156398.13	SFXN2	chr10	+	102729318	102729394	102728430	102728529	102729722	102729808	58471	28,23	2,6	1,9	0,0	176	100	0.000205059500901	0.00640654590224	0.888,0.685	1.0,1.0	-0.214
68307	ENSG00000265681.8	RPL17	chr18	-	49491735	49491833	49491531	49491584	49492457	49492508	68307	298,253	1200,1045	206,116	359,377	198	100	0.000205211466736	0.00640654590224	0.111,0.109	0.225,0.134	-0.069
36087	ENSG00000164877.19	MICALL2	chr7	-	1435100	1435147	1434358	1434672	1436741	1436856	36087	41,28	0,1	74,47	8,6	147	100	0.000206194230909	0.00641962166049	1.0,0.95	0.863,0.842	0.122
41235	ENSG00000111271.15	ACAD10	chr12	+	111729805	111729956	111727961	111728143	111733922	111734068	41235	78,52	0,5	13,17	4,6	251	100	0.000205988039895	0.00641962166049	1.0,0.806	0.564,0.53	0.356
49932	ENSG00000004455.18	AK2	chr1	-	33021366	33021461	33008896	33014594	33021592	33021703	49932	1887,2143	63,53	1237,1547	22,16	195	100	0.000206243667344	0.00641962166049	0.939,0.954	0.966,0.98	-0.027
61137	ENSG00000072518.22	MARK2	chr11	+	63903985	63904147	63903060	63903158	63904785	63905043	61137	86,85	78,102	18,13	26,70	262	100	0.000206047439796	0.00641962166049	0.296,0.241	0.209,0.066	0.131
25488	ENSG00000131374.15	TBC1D5	chr3	-	17562018	17562142	17508473	17508605	17623848	17623913	25488	13,6	23,16	3,1	34,15	224	100	0.000206683589915	0.00642853528365	0.201,0.143	0.038,0.029	0.138
63825	ENSG00000111364.16	DDX55	chr12	+	123617757	123617872	123616510	123616603	123618668	123618837	63825	54,45	0,0	28,29	8,0	215	100	0.00020747288755	0.00644829431127	1.0,1.0	0.619,1.0	0.191
56553	ENSG00000099246.18	RAB18	chr10	+	27513962	27514420	27509874	27509930	27526827	27526889	56553	45,52	222,191	18,48	236,341	558	100	0.000207976452532	0.00645436188677	0.035,0.047	0.013,0.025	0.022
56554	ENSG00000099246.18	RAB18	chr10	+	27513965	27514420	27509874	27509930	27526827	27526889	56554	45,52	222,191	18,48	236,341	555	100	0.000207887331729	0.00645436188677	0.035,0.047	0.014,0.025	0.022
3858	ENSG00000125814.17	NAPB	chr20	-	23397071	23397188	23394921	23394999	23402992	23403072	3858	15,12	14,16	18,33	6,4	217	100	0.00020827465599	0.00645882849853	0.331,0.257	0.58,0.792	-0.392
54256	ENSG00000143442.23	POGZ	chr1	-	151408408	151408581	151408099	151408240	151408693	151408828	54256	65,69	7,2	37,37	0,0	273	100	0.000209347906416	0.00648730577506	0.773,0.927	1.0,1.0	-0.15
31757	ENSG00000180530.11	NRIP1	chr21	-	15043494	15043574	14961234	14968526	15064744	15064934	31757	121,152	7,6	69,84	0,0	180	100	0.000210204075085	0.00650901893745	0.906,0.934	1.0,1.0	-0.08
62052	ENSG00000159063.14	ALG8	chr11	-	78134027	78135347	78127357	78127436	78139493	78139611	62052	30,24	60,66	18,21	8,19	1420	100	0.000210551345332	0.00651495349026	0.034,0.025	0.137,0.072	-0.075
7495	ENSG00000269699.7	ZIM2	chr19	-	56782399	56782471	56781952	56782121	56789871	56789951	7495	2,4	3,1	2,3	0,0	172	100	0.000211574035058	0.00653600194701	0.279,0.699	1.0,1.0	-0.511
14168	ENSG00000196313.13	POM121	chr7	+	72940816	72940993	72940413	72940516	72941836	72943522	14168	87,48	5,5	23,21	0,0	277	100	0.000211494096737	0.00653600194701	0.863,0.776	1.0,1.0	-0.18
61191	ENSG00000126432.14	PRDX5	chr11	+	64320660	64320792	64319733	64319868	64320864	64320903	61191	1409,791	25,14	1118,163	5,1	232	100	0.000211699955575	0.00653600194701	0.96,0.961	0.99,0.986	-0.028
42195	ENSG00000115355.18	CCDC88A	chr2	-	55303068	55303152	55301667	55302072	55308808	55309023	42195	60,59	91,95	65,65	42,54	184	100	0.000211967772556	0.00653944789835	0.264,0.252	0.457,0.395	-0.168
69065	ENSG00000221926.13	TRIM16	chr17	-	15658801	15658876	15642720	15642816	15677175	15677280	69065	3,0	3,1	6,1	1,0	175	100	0.000212187674132	0.00654141161822	0.364,0.0	0.774,1.0	-0.705
59533	ENSG00000139974.17	SLC38A6	chr14	+	61043449	61043503	61043146	61043212	61045345	61045425	59533	31,21	0,0	17,18	4,2	154	100	0.000212607003188	0.00654951595914	1.0,1.0	0.734,0.854	0.206
36493	ENSG00000135297.17	MTO1	chr6	+	73473364	73473654	73466208	73466606	73479731	73479844	36493	181,167	2,7	259,209	0,0	390	100	0.000212985073926	0.00655633832346	0.959,0.859	1.0,1.0	-0.091
28019	ENSG00000124120.11	TTPAL	chr20	+	44478623	44478647	44475887	44475991	44479984	44480444	28019	4,12	19,23	1,0	14,6	124	100	0.000213495014787	0.00656720704927	0.145,0.296	0.054,0.0	0.193
73107	ENSG00000067365.15	METTL22	chr16	+	8644528	8644725	8642462	8642565	8646107	8646218	73107	20,11	0,0	11,19	2,3	297	100	0.000214235285568	0.00658513966983	1.0,1.0	0.649,0.681	0.335
628	ENSG00000225470.9	JPX	chrX	+	73998767	74000496	73994839	73994961	74004269	74007534	628	500,471	6,2	320,487	0,0	1829	100	0.000215922423214	0.00662343860908	0.82,0.928	1.0,1.0	-0.126
10416	ENSG00000064995.19	TAF11	chr6	-	34879966	34880063	34877461	34878720	34880288	34880348	10416	235,206	3,12	249,227	2,0	197	100	0.000215847858927	0.00662343860908	0.975,0.897	0.984,1.0	-0.056
40222	ENSG00000177192.14	PUS1	chr12	+	131932721	131932833	131932174	131932312	131941291	131941422	40222	2,5	2,6	0,0	4,1	212	100	0.000216114108205	0.00662343860908	0.321,0.282	0.0,0.0	0.301
54038	ENSG00000119139.21	TJP2	chr9	+	69249374	69249485	69248011	69248224	69251034	69251364	54038	739,674	3,4	379,433	4,15	211	100	0.000216101027819	0.00662343860908	0.992,0.988	0.978,0.932	0.035
44908	ENSG00000185480.12	PARPBP	chr12	+	102164437	102164608	102153868	102153976	102165728	102165883	44908	113,127	4,0	85,142	5,15	271	100	0.000216996286951	0.00664561049978	0.912,1.0	0.863,0.777	0.136
13660	ENSG00000113048.19	MRPS27	chr5	-	72227049	72227275	72226056	72226199	72228265	72228368	13660	51,45	281,220	26,17	225,263	326	100	0.000217236709794	0.00664811027451	0.053,0.059	0.034,0.019	0.029
43483	ENSG00000206562.12	METTL6	chr3	-	15414020	15414162	15409759	15411437	15415771	15415907	43483	121,122	0,2	121,101	2,12	242	100	0.000220063474403	0.0067296985799	1.0,0.962	0.962,0.777	0.112
48230	ENSG00000196136.18	SERPINA3	chr14	+	94619194	94619468	94613346	94615084	94622340	94622491	48230	26575,24307	85,52	19095,15849	74,94	374	100	0.00022075700783	0.00674597965898	0.988,0.992	0.986,0.978	0.008
75135	ENSG00000185324.22	CDK10	chr16	+	89687588	89687815	89686683	89686797	89689251	89689324	75135	8,6	1,3	4,4	0,0	327	100	0.000221711865648	0.00677021681645	0.71,0.38	1.0,1.0	-0.455
58687	ENSG00000113648.17	MACROH2A1	chr5	-	135350822	135350913	135345967	135346057	135352945	135362901	58687	84,60	672,611	17,41	466,544	191	100	0.000221930800911	0.00677196281351	0.061,0.049	0.019,0.038	0.027
55668	ENSG00000168259.17	DNAJC7	chr17	-	42003358	42003557	42000481	42000570	42017039	42017146	55668	2,5	3,6	16,3	2,0	299	100	0.000224200632326	0.00683624142194	0.182,0.218	0.728,1.0	-0.664
64009	ENSG00000006740.18	ARHGAP44	chr17	+	12928928	12929046	12919754	12919831	12941055	12941124	64009	14,23	0,0	15,11	2,3	218	100	0.000224617862901	0.00684397877027	1.0,1.0	0.775,0.627	0.299
2644	ENSG00000142197.13	DOP1B	chr21	+	36280284	36280346	36278208	36278355	36281482	36281611	2644	11,9	0,0	12,7	2,3	162	100	0.000225881660454	0.00687427566013	1.0,1.0	0.787,0.59	0.311
24264	ENSG00000128513.16	POT1	chr7	-	124870910	124871041	124863349	124863640	124892265	124892380	24264	65,77	7,7	59,79	1,1	231	100	0.000225940602134	0.00687427566013	0.801,0.826	0.962,0.972	-0.153
15953	ENSG00000145388.15	METTL14	chr4	+	118705610	118705821	118703934	118704051	118709997	118715430	15953	183,222	4,8	113,120	0,0	311	100	0.000226285149143	0.0068797587283	0.936,0.899	1.0,1.0	-0.083
13573	ENSG00000233184.9	DPH5-DT	chr1	+	101077362	101077508	101075394	101075716	101083460	101083574	13573	8,3	2,2	12,5	0,0	246	100	0.000226451971244	0.00687983438036	0.619,0.379	1.0,1.0	-0.501
20765	ENSG00000081148.12	IMPG2	chr3	-	101243528	101244787	101242687	101242907	101245801	101246105	20765	3,8	0,0	0,8	2,0	1359	100	0.000228104477512	0.0069250137426	1.0,1.0	0.0,1.0	0.5
20464	ENSG00000154309.9	DISP1	chr1	+	222823855	222823945	222815058	222815078	222835118	222835215	20464	3,3	3,5	0,0	2,1	190	100	0.000229437954133	0.00696044923897	0.345,0.24	0.0,0.0	0.292
14233	ENSG00000117335.21	CD46	chr1	+	207767606	207767651	207767012	207767195	207767778	207767823	14233	44,25	1171,830	16,6	668,1004	145	100	0.000229966316029	0.0069714263726	0.025,0.02	0.016,0.004	0.012
44167	ENSG00000154556.20	SORBS2	chr4	-	185638876	185639035	185635354	185635411	185646667	185646782	44167	20,22	3,3	7,17	0,0	259	100	0.000230246693647	0.00697487541934	0.72,0.739	1.0,1.0	-0.27
27999	ENSG00000150756.14	ATPSCKMT	chr5	-	10235210	10235261	10225506	10227647	10236477	10236615	27999	13,6	5,4	21,22	1,1	151	100	0.000230599749225	0.00697905638018	0.633,0.498	0.933,0.936	-0.369
66686	ENSG00000125089.18	SH3TC1	chr4	+	8216956	8217167	8216110	8216257	8218270	8218347	66686	32,25	1,5	13,2	0,0	311	100	0.00023071811848	0.00697905638018	0.911,0.617	1.0,1.0	-0.236
37200	ENSG00000175581.14	MRPL48	chr11	+	73808312	73808350	73805026	73805079	73825707	73825796	37200	158,176	13,12	143,192	0,6	138	100	0.000231565589626	0.00699458398968	0.898,0.914	1.0,0.959	-0.074
68158	ENSG00000144455.14	SUMF1	chr3	-	3782502	3782701	3779240	3779322	3788913	3789074	68158	5,6	1,3	0,2	4,6	299	100	0.000231424506701	0.00699458398968	0.626,0.401	0.0,0.1	0.464
52374	ENSG00000122359.18	ANXA11	chr10	-	80180940	80181136	80172806	80172869	80205342	80205572	52374	0,1	7,5	2,10	5,3	296	100	0.000231761539119	0.00699545554089	0.0,0.063	0.119,0.53	-0.293
61782	ENSG00000184154.16	LRRC51	chr11	+	72085410	72085573	72080594	72080885	72088296	72088380	61782	6,4	14,8	0,0	5,7	263	100	0.000232056536663	0.00699931333386	0.14,0.16	0.0,0.0	0.15
72915	ENSG00000187535.14	IFT140	chr16	-	1568216	1568334	1566160	1566291	1580758	1580850	72915	28,41	7,3	35,25	1,0	218	100	0.000232404517444	0.00700476250741	0.647,0.862	0.941,1.0	-0.216
14423	ENSG00000171045.16	TSNARE1	chr8	-	142274780	142274863	142270474	142271691	142279859	142279997	14423	56,26	8,2	19,4	0,0	183	100	0.00023276135814	0.00701047068959	0.793,0.877	1.0,1.0	-0.165
32530	ENSG00000114026.22	OGG1	chr3	+	9754703	9754885	9751769	9751949	9756470	9756621	32530	35,16	1,0	10,1	2,2	282	100	0.000233569836332	0.00702976362188	0.925,1.0	0.639,0.151	0.568
9874	ENSG00000139540.12	SLC39A5	chr12	+	56237149	56237340	56236930	56237011	56237587	56237846	9874	68,46	7,3	17,6	0,0	291	100	0.000234222774095	0.007044350889	0.769,0.84	1.0,1.0	-0.196
19935	ENSG00000188681.13	TEKT4P2	chr21	-	9075114	9075341	9070213	9070444	9127488	9127535	19935	7,6	10,10	0,0	3,3	327	100	0.000234782610182	0.00705611914951	0.176,0.155	0.0,0.0	0.165
59123	ENSG00000153339.15	TRAPPC8	chr18	-	31890734	31890866	31873569	31874704	31897785	31897891	59123	69,97	0,0	37,82	0,8	232	100	0.000235687121438	0.00707822190746	1.0,1.0	1.0,0.815	0.093
33790	ENSG00000137955.16	RABGGTB	chr1	+	75786699	75786797	75786227	75786274	75787496	75787604	33790	21,28	146,140	34,53	110,117	198	100	0.000235900005087	0.0070795367118	0.068,0.092	0.135,0.186	-0.081
629	ENSG00000225470.9	JPX	chrX	+	73998953	74000496	73994839	73994961	74004269	74007534	629	473,439	6,2	289,470	0,0	1643	100	0.000237460494556	0.00712126332707	0.828,0.93	1.0,1.0	-0.121
31093	ENSG00000172175.16	MALT1	chr18	+	58733881	58733980	58733396	58733574	58734306	58734381	31093	0,0	81,39	16,1	84,85	199	100	0.000239503635644	0.00717739420633	0.0,0.0	0.087,0.006	-0.046
55539	ENSG00000156011.18	PSD3	chr8	-	18936033	18936142	18871625	18872733	19013562	19013686	55539	29,51	0,0	25,22	0,10	209	100	0.0002403640555	0.00719802659764	1.0,1.0	1.0,0.513	0.244
76566	ENSG00000108433.17	GOSR2	chr17	+	46964343	46965039	46938598	46938704	46966533	46966783	76566	124,110	29,24	88,92	6,7	796	100	0.000240786841774	0.00720553333157	0.349,0.365	0.648,0.623	-0.278
48433	ENSG00000272690.6	LINC02018	chr3	+	75451209	75451402	75443507	75443646	75537631	75538029	48433	6,3	0,6	0,0	3,4	293	100	0.000241444520314	0.00722005345925	1.0,0.146	0.0,0.0	0.573
37737	ENSG00000285280.2	ENSG00000285280	chr1	-	192627340	192627421	192593598	192593657	192739390	192739495	37737	8,6	8,1	0,1	4,2	181	100	0.000242878564028	0.00725775237904	0.356,0.768	0.0,0.216	0.454
22253	ENSG00000149577.16	SIDT2	chr11	+	117193852	117193963	117192616	117193258	117195801	117195915	22253	192,206	12,8	57,24	0,0	211	100	0.000243993754481	0.00728587627058	0.883,0.924	1.0,1.0	-0.097
38100	ENSG00000136933.17	RABEPK	chr9	+	125220538	125220700	125207563	125207721	125227909	125228059	38100	111,105	7,8	99,85	2,0	262	100	0.00024476781235	0.00729338396017	0.858,0.834	0.95,1.0	-0.129
59459	ENSG00000205531.13	NAP1L4	chr11	-	2989128	2989271	2979206	2979237	2992253	2992377	59459	12,11	34,32	26,14	8,13	243	100	0.000244657532115	0.00729338396017	0.127,0.124	0.572,0.307	-0.314
63633	ENSG00000151062.15	CACNA2D4	chr12	-	1810542	1810587	1810277	1810340	1811661	1811720	63633	41,25	30,24	70,31	22,6	145	100	0.000244593785144	0.00729338396017	0.485,0.418	0.687,0.781	-0.282
35530	ENSG00000117054.15	ACADM	chr1	+	75728388	75728488	75724779	75724817	75732643	75732741	35530	160,146	2,6	100,116	12,11	200	100	0.000245301533058	0.00730408867815	0.976,0.924	0.806,0.841	0.126
31360	ENSG00000187741.16	FANCA	chr16	-	89739705	89739800	89739477	89739553	89739993	89740099	31360	28,43	100,59	46,39	40,16	195	100	0.000245821466076	0.00730747896552	0.126,0.272	0.371,0.556	-0.265
44805	ENSG00000102710.21	SUPT20H	chr13	-	37021447	37021602	37019341	37019397	37022010	37022080	44805	288,305	5,9	177,282	0,0	255	100	0.000245939038873	0.00730747896552	0.958,0.93	1.0,1.0	-0.056
49754	ENSG00000123240.17	OPTN	chr10	+	13108961	13109015	13100172	13100302	13109111	13109288	49754	8,18	104,81	22,21	67,30	154	100	0.000245634998585	0.00730747896552	0.048,0.126	0.176,0.313	-0.158
56518	ENSG00000167508.12	MVD	chr16	-	88660747	88660841	88660519	88660637	88663010	88663148	56518	3,4	10,9	6,4	1,1	194	100	0.000246246620033	0.00731142889906	0.134,0.186	0.756,0.673	-0.554
49696	ENSG00000204371.12	EHMT2	chr6	-	31888968	31889070	31888598	31888747	31889227	31889342	49696	77,64	21,21	34,17	25,19	202	100	0.000246430814859	0.00731171230622	0.645,0.601	0.402,0.307	0.268
54296	ENSG00000196305.19	IARS1	chr9	-	92240642	92240691	92229000	92229126	92240855	92240961	54296	2,3	148,104	12,8	126,81	149	100	0.000246827441573	0.00731829379706	0.009,0.019	0.06,0.062	-0.047
33407	ENSG00000032444.17	PNPLA6	chr19	+	7534378	7534446	7534151	7534239	7534749	7534902	33407	28,69	10,6	21,21	1,0	168	100	0.000248486139309	0.00736225918059	0.625,0.873	0.926,1.0	-0.214
26155	ENSG00000183747.12	ACSM2A	chr16	+	20452380	20452466	20451536	20451681	20460106	20460291	26155	8,9	21,33	0,0	6,4	186	100	0.000250196771782	0.00740770003582	0.17,0.128	0.0,0.0	0.149
59557	ENSG00000148985.20	PGAP2	chr11	+	3823612	3823740	3808293	3808315	3823882	3824135	59557	2,3	0,1	0,1	6,0	228	100	0.000251316040762	0.00743558024488	1.0,0.568	0.0,1.0	0.284
28631	ENSG00000239213.7	NCK1-DT	chr3	-	136858517	136858603	136846527	136846586	136861746	136862033	28631	3,2	3,0	0,0	3,2	186	100	0.000251720491566	0.00744228699111	0.35,1.0	0.0,0.0	0.675
28273	ENSG00000054267.22	ARID4B	chr1	-	235181070	235181184	235177855	235177913	235181584	235181865	28273	13,11	97,83	4,7	136,180	214	100	0.000253461463976	0.00748200302622	0.059,0.058	0.014,0.018	0.042
32022	ENSG00000088298.13	EDEM2	chr20	-	35137879	35138005	35126250	35126375	35142372	35142478	32022	54,38	5,4	54,50	0,1	226	100	0.000253599959255	0.00748200302622	0.827,0.808	1.0,0.957	-0.161
56018	ENSG00000132970.14	WASF3	chr13	+	26680034	26680201	26671871	26671989	26681053	26681320	56018	14,10	5,2	39,35	2,0	267	100	0.000253387014026	0.00748200302622	0.512,0.652	0.88,1.0	-0.358
41873	ENSG00000141569.12	TRIM65	chr17	-	75892010	75892185	75889852	75891347	75892266	75892303	41873	106,93	9,11	84,31	2,0	275	100	0.000254060258797	0.00749030474263	0.811,0.755	0.939,1.0	-0.186
17502	ENSG00000163071.11	SPATA18	chr4	+	52062219	52062332	52060781	52060897	52071916	52072156	17502	65,74	4,10	26,48	24,14	213	100	0.000255057383695	0.00750912613811	0.884,0.776	0.337,0.617	0.353
47842	ENSG00000132854.19	KANK4	chr1	-	62247471	62247672	62236164	62238381	62263091	62263311	47842	89,40	6,4	20,8	0,0	301	100	0.000254933197569	0.00750912613811	0.831,0.769	1.0,1.0	-0.2
43030	ENSG00000196504.21	PRPF40A	chr2	-	152693157	152693476	152693037	152693068	152694541	152694622	43030	53,30	188,166	58,56	148,95	419	100	0.00025531189222	0.00751133687125	0.063,0.041	0.086,0.123	-0.052
41294	ENSG00000116209.12	TMEM59	chr1	-	54047266	54047372	54045485	54045786	54053355	54053504	41294	129,113	10,8	127,152	3,1	206	100	0.000256921223886	0.00755337572892	0.862,0.873	0.954,0.987	-0.103
30176	ENSG00000182473.22	EXOC7	chr17	-	76090328	76090481	76089174	76089320	76091142	76091235	30176	8,17	17,27	15,8	1,3	253	100	0.000257101923956	0.00755338389222	0.157,0.199	0.856,0.513	-0.506
70018	ENSG00000170234.13	PWWP2A	chr5	-	160080650	160080770	160075881	160078168	160093100	160094065	70018	23,14	8,5	5,4	12,6	220	100	0.000257455138356	0.00755845677929	0.567,0.56	0.159,0.233	0.367
56915	ENSG00000215126.11	CBWD6	chr9	-	41161600	41161723	41156382	41156439	41162332	41162377	56915	5,4	2,3	0,2	4,11	223	100	0.000258605165872	0.00758689927767	0.529,0.374	0.0,0.075	0.414
23306	ENSG00000023330.15	ALAS1	chr3	+	52198671	52198848	52198093	52198255	52199209	52199440	23306	6,5	193,202	15,0	46,51	277	100	0.000259152771539	0.00759764060258	0.011,0.009	0.105,0.0	-0.042
46357	ENSG00000117697.15	NSL1	chr1	-	212739533	212739601	212726152	212738686	212782371	212782426	46357	215,187	1,0	74,94	3,6	168	100	0.000260749887878	0.00763911410498	0.992,1.0	0.936,0.903	0.077
9388	ENSG00000056972.21	TRAF3IP2	chr6	-	111601195	111601306	111589099	111592094	111605775	111606254	9388	1,12	25,17	0,0	14,9	211	100	0.000262448960975	0.00767814517905	0.019,0.251	0.0,0.0	0.135
35792	ENSG00000119782.14	FKBP1B	chr2	+	24054472	24054540	24054103	24054192	24060813	24060926	35792	3,9	10,6	0,2	21,9	168	100	0.000262438972105	0.00767814517905	0.152,0.472	0.0,0.117	0.254
54363	ENSG00000165238.17	WNK2	chr9	+	93288787	93289620	93268626	93268746	93289977	93290047	54363	301,254	0,0	105,45	4,1	933	100	0.000263910359225	0.00771550781352	1.0,1.0	0.738,0.828	0.217
17283	ENSG00000129103.19	SUMF2	chr7	+	56074585	56074736	56074113	56074218	56076833	56076889	17283	159,90	4,7	160,87	1,0	251	100	0.000265191594249	0.00774755484524	0.941,0.837	0.985,1.0	-0.103
42312	ENSG00000213523.12	SRA1	chr5	-	140551981	140552184	140551060	140551169	140557146	140557272	42312	44,34	5,1	34,16	0,0	303	100	0.000265585429514	0.00775364993487	0.744,0.918	1.0,1.0	-0.169
57696	ENSG00000225484.7	NUTM2B-AS1	chr10	-	79808758	79808963	79806038	79806122	79814612	79814716	57696	103,165	1,7	50,179	26,16	305	100	0.000267744815672	0.00781124509276	0.971,0.885	0.387,0.786	0.341
68182	ENSG00000125247.16	TMTC4	chr13	-	100670282	100670569	100668578	100668794	100674743	100674879	68182	34,11	4,1	32,19	0,0	387	100	0.000268287124843	0.00782161593423	0.687,0.74	1.0,1.0	-0.286
7553	ENSG00000009950.16	MLXIPL	chr7	-	73605909	73605925	73605687	73605768	73616070	73616177	7553	389,462	44,47	155,169	10,3	116	100	0.000269935634525	0.00786419995782	0.884,0.894	0.93,0.98	-0.066
41872	ENSG00000141569.12	TRIM65	chr17	-	75891812	75891878	75888962	75891347	75892266	75892303	41872	48,52	9,11	23,35	2,0	166	100	0.000270292329131	0.00786911568781	0.763,0.74	0.874,1.0	-0.185
34178	ENSG00000089091.17	DZANK1	chr20	-	18451853	18451962	18448983	18449069	18452614	18452682	34178	3,8	21,8	0,0	4,9	209	100	0.000270568791792	0.00787169038803	0.064,0.324	0.0,0.0	0.194
37799	ENSG00000231584.10	FAHD2CP	chr2	+	96019627	96019700	96019200	96019260	96021124	96021233	37799	13,11	6,10	20,4	2,0	173	100	0.000271558015127	0.00789498354395	0.556,0.389	0.853,1.0	-0.454
25343	ENSG00000084676.16	NCOA1	chr2	+	24768078	24768135	24762686	24762776	24768223	24768543	25343	27,17	4,3	21,12	0,0	157	100	0.000272645209136	0.00789670042527	0.811,0.783	1.0,1.0	-0.203
34078	ENSG00000128609.16	NDUFA5	chr7	-	123546657	123546817	123545610	123545676	123550469	123550586	34078	15,19	287,247	4,5	317,513	260	100	0.000272642574632	0.00789670042527	0.02,0.029	0.005,0.004	0.02
39998	ENSG00000138785.16	INTS12	chr4	-	105703647	105703809	105699849	105700014	105707918	105708639	39998	4,1	5,11	19,3	0,2	262	100	0.000272682540734	0.00789670042527	0.234,0.034	1.0,0.364	-0.548
55755	ENSG00000148399.13	DPH7	chr9	-	137564892	137564958	137564433	137564606	137565084	137565154	55755	117,109	17,1	99,84	0,2	166	100	0.000272748807236	0.00789670042527	0.806,0.985	1.0,0.962	-0.086
70714	ENSG00000081154.12	PCNP	chr3	+	101579841	101580004	101574189	101574279	101585436	101585511	70714	536,492	14,13	304,368	37,15	263	100	0.00027213091741	0.00789670042527	0.936,0.935	0.758,0.903	0.105
72650	ENSG00000155324.10	GRAMD2B	chr5	+	126469676	126469788	126465151	126465545	126472237	126472304	72650	20,24	0,0	34,41	0,12	212	100	0.000272670412086	0.00789670042527	1.0,1.0	1.0,0.617	0.192
477	ENSG00000133138.20	TBC1D8B	chrX	+	106839325	106839457	106827169	106827337	106840047	106840198	477	25,38	2,4	60,56	0,0	232	100	0.000273334202319	0.00790817994477	0.843,0.804	1.0,1.0	-0.176
23591	ENSG00000188343.14	CIBAR1	chr8	+	93724509	93724595	93718674	93718788	93726393	93726513	23591	0,0	22,10	8,0	11,7	186	100	0.000274045152877	0.00792327370525	0.0,0.0	0.281,0.0	-0.141
7435	ENSG00000075303.13	SLC25A40	chr7	-	87841931	87842041	87841632	87841714	87843753	87843864	7435	0,0	13,12	3,7	16,20	210	100	0.000275374462436	0.00795621247059	0.0,0.0	0.082,0.143	-0.112
930	ENSG00000126768.13	TIMM17B	chrX	-	48895351	48895501	48895037	48895101	48896758	48896858	930	5,15	116,65	13,16	49,12	250	100	0.00027606701184	0.00797072100047	0.017,0.085	0.096,0.348	-0.171
38031	ENSG00000103121.9	CMC2	chr16	-	80997313	80997429	80980769	80980879	81006733	81006854	38031	61,57	0,0	53,63	7,1	216	100	0.000276974089256	0.00798880684841	1.0,1.0	0.778,0.967	0.127
53249	ENSG00000258311.5	ENSG00000258311	chr12	+	55716932	55717005	55716035	55716196	55719090	55719223	53249	173,122	7,5	125,139	0,0	173	100	0.00027707506375	0.00798880684841	0.935,0.934	1.0,1.0	-0.065
20290	ENSG00000116213.16	WRAP73	chr1	-	3635159	3635294	3634996	3635074	3635943	3636030	20290	101,88	7,2	85,77	0,0	235	100	0.000277542203928	0.00799676831896	0.86,0.949	1.0,1.0	-0.096
73128	ENSG00000171307.19	ZDHHC16	chr10	+	97453798	97453846	97453529	97453663	97454713	97454799	73128	101,145	80,75	194,365	47,130	148	100	0.000278735306331	0.00802562145774	0.46,0.566	0.736,0.655	-0.182
38200	ENSG00000131778.20	CHD1L	chr1	+	147270931	147271195	147268781	147268878	147272170	147272281	38200	175,115	6,5	169,172	29,16	364	100	0.000278995386377	0.00802758890081	0.889,0.863	0.616,0.747	0.195
57997	ENSG00000026103.25	FAS	chr10	+	89010752	89010815	89008888	89010600	89011998	89012081	57997	46,46	0,0	31,35	8,0	163	100	0.000279829008529	0.00804604494647	1.0,1.0	0.704,1.0	0.148
50249	ENSG00000100211.12	CBY1	chr22	+	38656955	38657143	38656639	38656750	38670883	38670989	50249	6,6	4,2	22,4	0,1	288	100	0.000280198191883	0.00805113061303	0.342,0.51	1.0,0.581	-0.364
62259	ENSG00000117834.13	SLC5A9	chr1	+	48231945	48232151	48231544	48231625	48232366	48232502	62259	156,102	7,4	84,20	0,0	306	100	0.000280573022116	0.0080563714478	0.879,0.893	1.0,1.0	-0.114
47104	ENSG00000093167.18	LRRFIP2	chr3	-	37066223	37066325	37065809	37065942	37072789	37072882	47104	1,1	0,0	3,0	1,2	202	100	0.000284709170886	0.00816953354294	1.0,1.0	0.598,0.0	0.701
73780	ENSG00000080603.17	SRCAP	chr16	+	30722562	30722748	30722121	30722286	30722962	30723229	73780	23,25	48,34	0,3	14,11	286	100	0.000286529931619	0.00821614766249	0.143,0.205	0.0,0.087	0.131
3959	ENSG00000125846.17	ZNF133	chr20	+	18305667	18305807	18288528	18288604	18306297	18306393	3959	48,56	0,0	10,33	0,6	240	100	0.000287346449488	0.00822404542882	1.0,1.0	1.0,0.696	0.152
31098	ENSG00000160124.9	MIX23	chr3	-	122365335	122365466	122362967	122363027	122366452	122366762	31098	14,21	2,3	43,37	0,0	231	100	0.000287394684399	0.00822404542882	0.752,0.752	1.0,1.0	-0.248
32941	ENSG00000040199.18	PHLPP2	chr16	-	71663898	71664099	71658652	71658815	71667177	71667333	32941	41,30	0,0	34,99	4,4	301	100	0.000287128444542	0.00822404542882	1.0,1.0	0.738,0.892	0.185
69724	ENSG00000119661.15	DNAL1	chr14	+	73651166	73651327	73645016	73645042	73653169	73653215	69724	2,2	0,1	0,1	5,0	261	100	0.000288594539174	0.00825273933232	1.0,0.434	0.0,1.0	0.217
40218	ENSG00000121064.13	SCPEP1	chr17	+	56998373	56998498	56996961	56997055	57000854	57000992	40218	105,73	4,9	48,62	1,0	225	100	0.000289198678672	0.00826437043181	0.921,0.783	0.955,1.0	-0.125
56753	ENSG00000119689.15	DLST	chr14	+	74882590	74882624	74881890	74882016	74885585	74885634	56753	12,14	1,5	2,3	0,0	134	100	0.000290146754508	0.00828580755626	0.9,0.676	1.0,1.0	-0.212
24637	ENSG00000132677.13	RHBG	chr1	+	156371181	156371254	156369211	156369436	156382747	156382869	24637	61,60	25,36	8,22	2,0	173	100	0.000291323666444	0.00831374594116	0.585,0.491	0.698,1.0	-0.311
40969	ENSG00000114982.19	KANSL3	chr2	-	96602115	96602338	96601642	96601776	96602752	96602862	40969	250,334	16,7	92,77	0,1	323	100	0.000293208299812	0.00836182934035	0.829,0.937	1.0,0.96	-0.097
12570	ENSG00000112983.18	BRD8	chr5	-	138164086	138164133	138163129	138163344	138164319	138164413	12570	363,410	10,8	378,352	37,11	147	100	0.000294509174349	0.00839166001799	0.961,0.972	0.874,0.956	0.051
24833	ENSG00000119688.21	ABCD4	chr14	-	74300149	74300268	74299177	74299675	74302874	74302918	24833	37,40	2,6	19,4	0,0	219	100	0.000294655206651	0.00839166001799	0.894,0.753	1.0,1.0	-0.176
15203	ENSG00000101901.13	ALG13	chrX	+	111716952	111717004	111713224	111713297	111717845	111717927	15203	3,3	5,3	0,1	6,15	152	100	0.00029575362163	0.00841721643069	0.283,0.397	0.0,0.042	0.319
44461	ENSG00000114209.15	PDCD10	chr3	-	167725400	167725473	167720061	167720273	167734458	167734510	44461	3,2	0,0	3,4	3,1	173	100	0.000297251460029	0.00845409808024	1.0,1.0	0.366,0.698	0.468
7567	ENSG00000009950.16	MLXIPL	chr7	-	73607330	73607420	73606973	73607018	73616070	73616177	7567	38,18	2,5	18,5	0,0	190	100	0.000297500885271	0.00845544776773	0.909,0.655	1.0,1.0	-0.218
9109	ENSG00000101266.19	CSNK2A1	chr20	-	508450	508621	505117	505229	543671	543727	9109	577,532	10,8	620,667	2,1	271	100	0.000298083210648	0.00846444757106	0.955,0.961	0.991,0.996	-0.036
21532	ENSG00000134744.14	TUT4	chr1	-	52458335	52458449	52446589	52446667	52461133	52461223	21532	78,79	3,1	68,53	15,4	214	100	0.000298246164882	0.00846444757106	0.924,0.974	0.679,0.861	0.179
31548	ENSG00000119977.22	TCTN3	chr10	-	95669046	95669157	95663416	95664300	95680471	95680607	31548	7,8	62,54	0,0	23,53	211	100	0.000298424092079	0.00846444757106	0.051,0.066	0.0,0.0	0.058
63687	ENSG00000078246.17	TULP3	chr12	+	2937630	2937729	2934446	2934561	2938113	2938285	63687	101,100	9,2	47,66	0,0	199	100	0.000298968577029	0.00847414995079	0.849,0.962	1.0,1.0	-0.095
15007	ENSG00000102897.10	LYRM1	chr16	+	20900297	20900535	20899901	20900004	20915555	20915714	15007	516,441	25,16	168,337	3,3	338	100	0.000303335660197	0.0085921159771	0.859,0.891	0.943,0.971	-0.082
3960	ENSG00000125846.17	ZNF133	chr20	+	18305680	18305807	18288282	18288604	18306297	18306393	3960	48,58	0,0	10,33	0,6	227	100	0.000304489729152	0.0086189739763	1.0,1.0	1.0,0.708	0.146
35903	ENSG00000060971.19	ACAA1	chr3	-	38129289	38129388	38127630	38127866	38131595	38131638	35903	1110,1023	21,15	1331,605	7,3	199	100	0.000305148237736	0.00862594934019	0.964,0.972	0.99,0.99	-0.022
36983	ENSG00000168137.20	SETD5	chr3	+	9422722	9423257	9397895	9397977	9424466	9424526	36983	24,43	40,33	16,27	4,8	635	100	0.000305012794346	0.00862594934019	0.086,0.17	0.386,0.347	-0.238
76807	ENSG00000108924.14	HLF	chr17	+	55288880	55288983	55267815	55268086	55315231	55315447	76807	19,28	4,2	5,4	0,0	203	100	0.000306063040969	0.00864597112697	0.701,0.873	1.0,1.0	-0.213
3036	ENSG00000124222.22	STX16	chr20	+	58669290	58669453	58667986	58668127	58670511	58670603	3036	207,182	53,48	109,127	47,83	263	100	0.000308211711066	0.0087007978987	0.598,0.59	0.469,0.368	0.175
17180	ENSG00000180376.17	CCDC66	chr3	+	56560861	56561012	56559568	56559594	56563683	56563825	17180	7,6	26,19	0,1	10,24	251	100	0.000308836507782	0.00871092579998	0.097,0.112	0.0,0.016	0.097
20950	ENSG00000183735.11	TBK1	chr12	+	64500104	64500313	64497967	64498039	64501329	64502056	20950	10,4	45,30	0,0	45,19	309	100	0.000308986619204	0.00871092579998	0.067,0.041	0.0,0.0	0.054
15671	ENSG00000128039.13	SRD5A3	chr4	+	55367587	55367722	55364073	55364271	55369831	55370109	15671	144,127	0,4	103,77	6,9	235	100	0.000310020743754	0.00873419814082	1.0,0.931	0.88,0.785	0.133
32031	ENSG00000214087.9	ARL16	chr17	-	81682490	81682675	81682033	81682149	81683012	81683126	32031	13,12	30,30	23,8	7,6	285	100	0.00031026935808	0.00873532392469	0.132,0.123	0.536,0.319	-0.3
37449	ENSG00000127328.22	RAB3IP	chr12	+	69800208	69800337	69795140	69795344	69812777	69812834	37449	22,16	7,0	26,19	0,0	229	100	0.000310640210109	0.00873988736305	0.578,1.0	1.0,1.0	-0.211
60017	ENSG00000135829.17	DHX9	chr1	+	182855576	182855713	182854040	182854178	182856531	182856572	60017	38,49	217,192	34,31	192,464	237	100	0.000311328202426	0.00874748670776	0.069,0.097	0.07,0.027	0.035
75493	ENSG00000215041.10	NEURL4	chr17	-	7327164	7327230	7326710	7327009	7327439	7327500	75493	43,45	4,6	18,6	0,0	166	100	0.000311230043817	0.00874748670776	0.866,0.819	1.0,1.0	-0.157
12563	ENSG00000120705.13	ETF1	chr5	-	138529554	138529678	138518691	138518867	138542832	138542936	12563	27,20	68,83	4,6	39,66	224	100	0.000313093578253	0.00879118890246	0.151,0.097	0.044,0.039	0.083
51708	ENSG00000091262.17	ABCC6	chr16	-	16184958	16185034	16178797	16178965	16187123	16187211	51708	35,29	6,6	26,7	1,0	176	100	0.000313421138312	0.00879448790579	0.768,0.733	0.937,1.0	-0.218
78470	ENSG00000118096.10	IFT46	chr11	-	118557737	118557890	118556905	118557045	118559784	118559864	78470	20,30	32,45	0,7	7,35	253	100	0.00031802679903	0.00891774410006	0.198,0.209	0.0,0.073	0.167
32699	ENSG00000154222.15	CC2D1B	chr1	-	52357000	52357126	52356383	52356442	52357525	52357698	32699	45,34	7,1	20,9	0,0	226	100	0.000318892778006	0.0089300643152	0.74,0.938	1.0,1.0	-0.161
74848	ENSG00000231312.8	MAP4K3-DT	chr2	+	39588448	39588567	39518582	39518710	39599365	39600135	74848	0,2	15,5	10,3	8,6	219	100	0.000318790925122	0.0089300643152	0.0,0.154	0.363,0.186	-0.197
39454	ENSG00000179818.17	PCBP1-AS1	chr2	-	70053730	70053792	70051044	70051305	70083506	70083687	39454	6,7	4,6	11,24	1,2	162	100	0.000319563118286	0.00893688039215	0.481,0.419	0.872,0.881	-0.427
40125	ENSG00000172771.12	EFCAB12	chr3	-	129404249	129404403	129402522	129402579	129408644	129408858	40125	9,11	4,3	15,6	1,0	254	100	0.000319366029573	0.00893688039215	0.47,0.591	0.855,1.0	-0.397
33800	ENSG00000166526.18	ZNF3	chr7	-	100077228	100077433	100075541	100075630	100079535	100079656	33800	39,43	4,2	61,67	0,0	305	100	0.00031988948181	0.00894003548463	0.762,0.876	1.0,1.0	-0.181
24036	ENSG00000054392.13	HHAT	chr1	+	210348932	210349066	210328901	210329104	210362851	210362919	24036	65,56	0,0	38,39	7,0	234	100	0.00032041939704	0.00894672628801	1.0,1.0	0.699,1.0	0.151
35549	ENSG00000117054.15	ACADM	chr1	+	75742167	75745914	75739979	75740110	75749418	75749559	35549	299,323	0,0	373,355	7,0	3847	100	0.000320556298388	0.00894672628801	1.0,1.0	0.581,1.0	0.21
53022	ENSG00000164946.20	FREM1	chr9	-	14740148	14740234	14737151	14737595	14746352	14746468	53022	381,268	34,12	392,156	7,6	186	100	0.000321496924532	0.00896700116291	0.858,0.923	0.968,0.933	-0.06
73798	ENSG00000213468.7	FIRRE	chrX	-	131711650	131711744	131691557	131692636	131749305	131749458	73798	9,1	5,10	0,0	8,1	194	100	0.000323164034242	0.0090074981981	0.481,0.049	0.0,0.0	0.265
61262	ENSG00000162298.19	SYVN1	chr11	-	65132247	65132308	65131469	65131596	65132731	65132780	61262	41,24	3,4	44,11	0,0	161	100	0.000323542994325	0.00901206084991	0.895,0.788	1.0,1.0	-0.158
9953	ENSG00000138777.20	PPA2	chr4	-	105437949	105438036	105424195	105424322	105446382	105446502	9953	53,64	0,0	79,67	2,7	187	100	0.000326027283587	0.00907522089586	1.0,1.0	0.955,0.837	0.104
27824	ENSG00000117602.13	RCAN3	chr1	+	24533112	24533254	24531217	24531391	24535092	24535357	27824	71,61	0,0	80,94	10,0	242	100	0.000326738301358	0.00908896942615	1.0,1.0	0.768,1.0	0.116
20437	ENSG00000121716.21	PILRB	chr7	+	100353894	100354012	100353372	100353483	100355142	100355240	20437	54,43	5,3	50,8	0,0	218	100	0.000327374499369	0.00909458089986	0.832,0.868	1.0,1.0	-0.15
63667	ENSG00000111206.13	FOXM1	chr12	-	2861298	2861412	2857682	2859663	2864319	2864495	63667	21,13	35,31	3,0	19,10	214	100	0.000327354850509	0.00909458089986	0.219,0.164	0.069,0.0	0.157
49071	ENSG00000175455.16	CCDC14	chr3	-	123955842	123955965	123948895	123949132	123956045	123956115	49071	95,105	8,3	22,64	0,0	223	100	0.000328467593173	0.00911889641127	0.842,0.94	1.0,1.0	-0.109
23762	ENSG00000166479.10	TMX3	chr18	-	68700404	68700485	68697930	68698031	68710020	68710144	23762	34,25	3,0	20,31	6,10	181	100	0.000329828620085	0.00915061310792	0.862,1.0	0.648,0.631	0.292
67633	ENSG00000123200.17	ZC3H13	chr13	-	46051931	46051989	46045390	46045516	46052403	46052685	67633	2,1	8,6	4,10	3,2	158	100	0.000331128690668	0.0091805977714	0.137,0.095	0.458,0.76	-0.493
26113	ENSG00000198625.14	MDM4	chr1	+	204537429	204537497	204532190	204532246	204538208	204538308	26113	13,5	31,34	17,34	16,39	168	100	0.000332212007864	0.00920453720002	0.2,0.08	0.387,0.342	-0.225
64106	ENSG00000168675.19	LDLRAD4	chr18	+	13643358	13643412	13620867	13621271	13645126	13645205	64106	7,7	12,20	0,0	2,1	154	100	0.000333886445594	0.00924481219894	0.275,0.185	0.0,0.0	0.23
58695	ENSG00000166886.13	NAB2	chr12	+	57093406	57093598	57093062	57093195	57094611	57095476	58695	40,20	8,0	25,8	0,0	292	100	0.000334786162894	0.00926359729647	0.631,1.0	1.0,1.0	-0.184
1540	ENSG00000100395.15	L3MBTL2	chr22	+	41213850	41214026	41209695	41209933	41216138	41216262	1540	70,33	3,5	17,8	0,0	276	100	0.000335374613963	0.00927375047131	0.894,0.705	1.0,1.0	-0.201
15668	ENSG00000288695.1	ENSG00000288695	chr4	+	55364073	55364271	55359345	55359488	55367587	55367722	15668	70,81	5,3	57,26	0,0	298	100	0.000335624929338	0.00927454631468	0.824,0.901	1.0,1.0	-0.137
68639	ENSG00000102805.16	CLN5	chr13	+	76998042	76998085	76995901	76996127	77000457	77002477	68639	10,9	50,40	0,2	31,24	143	100	0.00033643819985	0.00929088735931	0.123,0.136	0.0,0.055	0.102
9982	ENSG00000106070.20	GRB10	chr7	-	50710874	50710990	50703820	50703908	50732271	50732368	9982	2,3	1,0	4,0	4,8	216	100	0.00033670681064	0.00929217575969	0.481,1.0	0.316,0.0	0.582
2890	ENSG00000101246.20	ARFRP1	chr20	-	63706998	63707092	63706650	63706738	63707866	63707996	2890	219,208	6,10	142,213	0,2	194	100	0.000337239760368	0.00930075267971	0.95,0.915	1.0,0.982	-0.058
12537	ENSG00000127957.20	PMS2P3	chr7	-	75512308	75512421	75510930	75511114	75512588	75512675	12537	42,26	1,1	20,12	7,2	213	100	0.000338211842555	0.00931778750922	0.952,0.924	0.573,0.738	0.282
71741	ENSG00000163703.20	CRELD1	chr3	+	9943993	9944095	9943076	9943515	9944364	9944886	71741	12,12	65,42	2,0	24,24	202	100	0.000338302568112	0.00931778750922	0.084,0.124	0.04,0.0	0.084
66740	ENSG00000184445.12	KNTC1	chr12	+	122597730	122597938	122593415	122594385	122602568	122602740	66740	89,81	0,0	36,56	3,3	308	100	0.000338528674134	0.00931788490639	1.0,1.0	0.796,0.858	0.173
67659	ENSG00000130821.17	SLC6A8	chrX	+	153693040	153693175	153691974	153692107	153693262	153693366	67659	570,437	21,15	368,239	4,2	235	100	0.000339882605724	0.00934900478885	0.92,0.925	0.975,0.981	-0.055
73408	ENSG00000140694.18	PARN	chr16	-	14591912	14592033	14584748	14584791	14593300	14593378	73408	3,8	7,3	1,0	6,4	221	100	0.000342892409636	0.00942560126685	0.162,0.547	0.07,0.0	0.32
633	ENSG00000225470.9	JPX	chrX	+	73999354	74000496	73994839	73994961	74004269	74004543	633	406,397	6,2	267,437	0,0	1242	100	0.00034408369297	0.00944594347947	0.845,0.941	1.0,1.0	-0.107
49893	ENSG00000135124.16	P2RX4	chr12	+	121217133	121217281	121210116	121210298	121221912	121221984	49893	154,95	4,6	142,29	0,0	248	100	0.00034388188796	0.00944594347947	0.939,0.865	1.0,1.0	-0.098
53161	ENSG00000169220.18	RGS14	chr5	+	177371474	177371589	177371349	177371396	177371872	177372166	53161	81,64	1,3	43,21	6,6	215	100	0.000344825384311	0.00945626270512	0.974,0.908	0.769,0.619	0.247
73265	ENSG00000153048.11	CARHSP1	chr16	-	8868048	8868160	8859170	8859335	8868531	8868719	73265	3,3	0,2	1,0	2,2	212	100	0.00034491133765	0.00945626270512	1.0,0.414	0.191,0.0	0.611
2891	ENSG00000101246.20	ARFRP1	chr20	-	63706998	63707097	63706650	63706738	63707866	63707916	2891	217,209	6,10	126,219	0,2	199	100	0.000345335168018	0.00946168639337	0.948,0.913	1.0,0.982	-0.06
11556	ENSG00000169045.17	HNRNPH1	chr5	-	179615545	179615595	179614177	179614959	179616125	179616218	11556	3051,3155	409,346	1562,2075	136,147	150	100	0.00034616467676	0.0094782107211	0.833,0.859	0.884,0.904	-0.048
64979	ENSG00000182389.20	CACNB4	chr2	-	151869176	151869193	151860710	151860820	151870530	151870611	64979	3,3	2,7	2,4	0,1	117	100	0.00034772772313	0.0095085702997	0.562,0.268	1.0,0.774	-0.472
67455	ENSG00000120697.10	ALG5	chr13	-	36967671	36967807	36965574	36965726	36971976	36972036	67455	8,0	12,4	0,0	16,5	236	100	0.000347667705052	0.0095085702997	0.22,0.0	0.0,0.0	0.11
47942	ENSG00000248487.10	ABHD14A	chr3	+	51980392	51980628	51978258	51978374	51980835	51981196	47942	102,92	7,2	53,37	0,0	336	100	0.000348142594833	0.00951223242164	0.813,0.932	1.0,1.0	-0.127
71519	ENSG00000138592.14	USP8	chr15	+	50441348	50441493	50439008	50439177	50458999	50459134	71519	70,44	0,0	74,71	2,6	245	100	0.00034831607076	0.00951223242164	1.0,1.0	0.938,0.828	0.117
7981	ENSG00000121067.19	SPOP	chr17	-	49675894	49676016	49636758	49636809	49677932	49678000	7981	8,2	1,3	2,2	0,0	222	100	0.000348632698266	0.0095146726942	0.783,0.231	1.0,1.0	-0.493
71472	ENSG00000104047.15	DTWD1	chr15	+	49632170	49632302	49625112	49625431	49634535	49634595	71472	32,35	0,0	33,46	0,8	232	100	0.000349954310282	0.00954451934851	1.0,1.0	1.0,0.713	0.143
54921	ENSG00000136861.19	CDK5RAP2	chr9	-	120470110	120470217	120467859	120467997	120471747	120471878	54921	103,104	3,7	64,98	10,18	207	100	0.000350348209541	0.00954904153153	0.943,0.878	0.756,0.725	0.17
11652	ENSG00000146067.17	FAM193B	chr5	-	177547167	177547228	177538904	177539147	177553167	177553266	11652	40,16	10,5	41,27	3,0	161	100	0.000352722029509	0.00960748716031	0.713,0.665	0.895,1.0	-0.258
30127	ENSG00000127054.22	INTS11	chr1	-	1322891	1323287	1320995	1321093	1324580	1324613	30127	17,18	135,100	2,0	75,41	496	100	0.000353480477044	0.00962188567714	0.025,0.035	0.005,0.0	0.028
352	ENSG00000122121.12	XPNPEP2	chrX	+	129753158	129753248	129752149	129752345	129754471	129754581	352	22,19	0,0	18,6	6,0	190	100	0.000354175795522	0.00963454819982	1.0,1.0	0.612,1.0	0.194
72505	ENSG00000140525.20	FANCI	chr15	+	89306009	89306194	89305604	89305698	89307475	89307529	72505	149,97	2,0	79,40	8,1	285	100	0.000355515293642	0.00966470634307	0.963,1.0	0.776,0.933	0.127
21723	ENSG00000078898.7	BPIFB2	chr20	+	33019061	33019115	33018636	33018822	33019579	33019750	21723	3440,2701	377,309	2695,1148	200,78	154	100	0.000355992197288	0.00966650884609	0.856,0.85	0.897,0.905	-0.048
51447	ENSG00000132541.11	RIDA	chr8	-	98108645	98108768	98106271	98106326	98117031	98117110	51447	130,149	5,10	31,33	0,0	223	100	0.000356274289968	0.00966650884609	0.921,0.87	1.0,1.0	-0.105
60780	ENSG00000139631.20	CSAD	chr12	-	53171272	53171441	53170422	53170502	53171881	53171988	60780	21,33	8,1	4,2	15,1	269	100	0.000356151013828	0.00966650884609	0.494,0.925	0.09,0.426	0.452
66298	ENSG00000109180.15	OCIAD1	chr4	+	48831226	48831433	48831062	48831141	48832619	48832682	66298	15,18	2,3	10,5	0,0	307	100	0.000357827197351	0.00970235467429	0.71,0.662	1.0,1.0	-0.314
379	ENSG00000125676.20	THOC2	chrX	-	123613638	123613708	123611439	123611516	123614051	123614189	379	322,198	8,6	294,313	0,0	170	100	0.000358331831984	0.00970974896182	0.959,0.951	1.0,1.0	-0.045
35312	ENSG00000271601.4	LIX1L	chr1	-	145937603	145937699	145936907	145936985	145942712	145942853	35312	79,62	0,0	57,53	8,0	196	100	0.00035921027844	0.0097272563434	1.0,1.0	0.784,1.0	0.108
41347	ENSG00000106603.20	COA1	chr7	-	43665657	43665722	43648599	43648652	43729428	43729505	41347	5,8	39,42	0,0	22,12	165	100	0.00035966313312	0.00973322370269	0.072,0.103	0.0,0.0	0.087
9416	ENSG00000198917.13	SPOUT1	chr9	-	128823746	128823894	128819650	128822833	128824071	128824174	9416	57,41	4,4	21,7	0,0	248	100	0.000361795115696	0.00978459465027	0.852,0.805	1.0,1.0	-0.171
12536	ENSG00000127957.20	PMS2P3	chr7	-	75512308	75512411	75510930	75511114	75512588	75512675	12536	32,20	1,1	15,9	7,2	203	100	0.000362712076091	0.00980306072663	0.94,0.908	0.514,0.689	0.323
32019	ENSG00000088298.13	EDEM2	chr20	-	35134737	35134949	35126250	35126375	35142372	35142478	32019	45,31	5,4	47,17	0,1	312	100	0.000363353229555	0.0098119578985	0.743,0.713	1.0,0.845	-0.195
58571	ENSG00000150593.18	PDCD4	chr10	+	110876669	110876753	110875965	110876070	110881232	110881535	58571	1,1	75,51	8,10	90,74	184	100	0.000363744384533	0.0098119578985	0.007,0.011	0.046,0.068	-0.048
73199	ENSG00000258867.8	LINC01146	chr14	+	88084036	88084483	88024549	88024669	88096498	88097053	73199	66,71	50,55	38,155	15,26	547	100	0.000363618730568	0.0098119578985	0.194,0.191	0.317,0.521	-0.227
44453	ENSG00000064012.24	CASP8	chr2	+	201274888	201274953	201272637	201272776	201276826	201276968	44453	309,375	42,44	147,220	14,3	165	100	0.000364946427847	0.00983804391617	0.817,0.838	0.864,0.978	-0.094
21121	ENSG00000143774.17	GUK1	chr1	+	228141632	228141829	228140317	228140363	228145491	228145624	21121	2,2	1,2	9,10	0,0	297	100	0.000367011950977	0.00988097175246	0.402,0.252	1.0,1.0	-0.673
35041	ENSG00000187109.15	NAP1L1	chr12	-	76074202	76074239	76056032	76056161	76084566	76084612	35041	37,27	0,0	14,5	6,0	137	100	0.000367132013883	0.00988097175246	1.0,1.0	0.63,1.0	0.185
41264	ENSG00000150527.18	MIA2	chr14	+	39320927	39321056	39319208	39319291	39326863	39327022	41264	233,227	42,60	95,61	39,53	229	100	0.000367246913814	0.00988097175246	0.708,0.623	0.515,0.334	0.241
42726	ENSG00000126858.19	RHOT1	chr17	+	32171046	32171101	32142559	32142729	32173830	32173912	42726	68,38	7,2	28,39	0,0	155	100	0.000368768395489	0.00991553556657	0.862,0.925	1.0,1.0	-0.107
42763	ENSG00000149761.9	NUDT22	chr11	+	64227400	64227493	64226608	64227132	64227567	64227666	42763	0,2	7,7	6,2	3,0	193	100	0.000369495194613	0.00992870110557	0.0,0.129	0.509,1.0	-0.69
5948	ENSG00000100342.22	APOL1	chr22	+	36253837	36253991	36253077	36253219	36254936	36254999	5948	42,36	283,210	71,49	261,132	254	100	0.00037010896752	0.00993094723519	0.055,0.063	0.097,0.128	-0.054
58470	ENSG00000156398.13	SFXN2	chr10	+	102727674	102727791	102726986	102727157	102728430	102728511	58470	5,4	18,9	0,0	8,12	217	100	0.000370290424797	0.00993094723519	0.113,0.17	0.0,0.0	0.142
59778	ENSG00000130413.16	STK33	chr11	-	8473162	8473276	8464708	8464822	8474680	8474755	59778	130,91	17,13	89,125	4,4	214	100	0.000370017086331	0.00993094723519	0.781,0.766	0.912,0.936	-0.15
74142	ENSG00000182885.17	ADGRG3	chr16	+	57676199	57676338	57673320	57673468	57678169	57678282	74142	18,16	0,0	28,21	8,0	239	100	0.000371392692412	0.00995413256583	1.0,1.0	0.594,1.0	0.203
37795	ENSG00000231584.10	FAHD2CP	chr2	+	96019537	96019700	96019200	96019260	96021124	96021233	37795	17,12	6,10	25,4	2,0	263	100	0.000372692246773	0.00998257255992	0.519,0.313	0.826,1.0	-0.497
9108	ENSG00000101266.19	CSNK2A1	chr20	-	508450	508605	505117	505229	543671	543730	9108	575,530	10,8	620,667	2,1	255	100	0.000373396775063	0.00998990771137	0.958,0.963	0.992,0.996	-0.034
40219	ENSG00000121064.13	SCPEP1	chr17	+	56998384	56998498	56996961	56997055	57000854	57000992	40219	216,156	4,9	136,177	1,0	214	100	0.000373443343325	0.00998990771137	0.962,0.89	0.985,1.0	-0.067
60392	ENSG00000243156.9	MICAL3	chr22	-	17822946	17823060	17822029	17822170	17831853	17832000	60392	92,89	6,4	60,32	0,0	214	100	0.000373718989195	0.0099908974985	0.878,0.912	1.0,1.0	-0.105
42908	ENSG00000141127.15	PRPSAP2	chr17	+	18859339	18859475	18858103	18858261	18865801	18865900	42908	6,3	15,7	0,0	10,3	236	100	0.000374582956355	0.0100012215994	0.145,0.154	0.0,0.0	0.149
75384	ENSG00000167840.14	ZNF232	chr17	-	5111075	5111219	5108925	5109868	5111799	5111815	75384	122,112	22,35	70,80	6,5	244	100	0.000374505819445	0.0100012215994	0.694,0.567	0.827,0.868	-0.217
62357	ENSG00000166004.15	CEP295	chr11	+	93723040	93723289	93721953	93722050	93725650	93725831	62357	56,62	0,0	36,63	8,0	349	100	0.00037603094055	0.0100334833181	1.0,1.0	0.563,1.0	0.219
70871	ENSG00000224078.15	SNHG14	chr15	+	25105699	25105824	25103858	25103970	25106163	25106181	70871	36,28	177,172	44,23	59,82	225	100	0.000376729586791	0.0100457223892	0.083,0.067	0.249,0.111	-0.105
7668	ENSG00000133612.19	AGAP3	chr7	+	151120519	151120745	151119986	151120145	151123793	151123850	7668	17,7	17,14	5,3	1,0	326	100	0.000378698818485	0.0100918052424	0.235,0.133	0.605,1.0	-0.619
52897	ENSG00000099783.12	HNRNPM	chr19	+	8483157	8483211	8474166	8474244	8485602	8485648	52897	731,619	62,47	499,429	26,10	154	100	0.000380858713132	0.0101429071408	0.884,0.895	0.926,0.965	-0.056
67621	ENSG00000185864.18	NPIPB4	chr16	-	21857658	21857756	21857291	21857416	21863782	21864103	67621	15,8	6,4	9,5	1,0	198	100	0.000381331396365	0.0101490393572	0.558,0.503	0.82,1.0	-0.379
34048	ENSG00000143740.15	SNAP47	chr1	+	227731584	227731712	227728617	227728786	227747691	227748186	34048	4,2	0,0	3,0	0,7	228	100	0.000384459527032	0.0102257929474	1.0,1.0	1.0,0.0	0.5
3925	ENSG00000132669.14	RIN2	chr20	+	19815222	19815298	19799621	19799747	19871081	19872284	3925	14,18	8,5	5,3	15,5	176	100	0.000385079910126	0.0102357907539	0.499,0.672	0.159,0.254	0.379
8081	ENSG00000168894.10	RNF181	chr2	+	85596821	85596931	85596518	85596649	85597103	85597178	8081	1001,968	19,8	941,913	3,1	210	100	0.000386109838475	0.0102566550684	0.962,0.983	0.993,0.998	-0.023
52588	ENSG00000104529.19	EEF1D	chr8	-	143590607	143590738	143588990	143590081	143597347	143597415	52588	13,14	55,52	0,0	9,4	231	100	0.000387997865664	0.0103002730793	0.093,0.104	0.0,0.0	0.099
2162	ENSG00000275004.4	ZNF280B	chr22	-	22486860	22489466	22484857	22485978	22494062	22494180	2162	331,371	4,5	229,300	1,0	2706	100	0.000389798355325	0.0103235582694	0.754,0.733	0.894,1.0	-0.204
4950	ENSG00000214855.11	APOC1P1	chr19	+	44927794	44927930	44926798	44927033	44930999	44931058	4950	63,33	10,8	49,40	3,0	236	100	0.000389861354925	0.0103235582694	0.727,0.636	0.874,1.0	-0.256
25089	ENSG00000137075.18	RNF38	chr9	-	36342324	36342424	36336395	36339814	36344831	36344953	25089	50,42	0,0	49,23	0,9	200	100	0.000389174250637	0.0103235582694	1.0,1.0	1.0,0.561	0.22
57514	ENSG00000108861.9	DUSP3	chr17	-	43777528	43777813	43774711	43774938	43778799	43778935	57514	7,6	136,118	3,17	58,37	385	100	0.00038971216384	0.0103235582694	0.013,0.013	0.013,0.107	-0.047
3139	ENSG00000000419.14	DPM1	chr20	-	50941128	50941209	50940864	50940933	50942030	50942126	3139	25,62	471,489	21,5	375,277	181	100	0.000390837838065	0.010342873635	0.028,0.065	0.03,0.01	0.026
61188	ENSG00000126432.14	PRDX5	chr11	+	64319733	64319868	64318120	64318386	64320660	64320792	61188	1503,1016	12,23	1040,420	5,0	235	100	0.000391884812995	0.0103640288667	0.982,0.949	0.989,1.0	-0.029
8912	ENSG00000106477.20	CEP41	chr7	-	130400038	130400254	130393770	130399039	130400697	130400821	8912	31,14	6,0	17,2	0,0	316	100	0.000393077647658	0.010389012449	0.62,1.0	1.0,1.0	-0.19
7629	ENSG00000111832.13	RWDD1	chr6	+	116574057	116574171	116572421	116572478	116580294	116580360	7629	77,61	2,0	53,47	3,8	214	100	0.000393726662482	0.0103903512729	0.947,1.0	0.892,0.733	0.161
27323	ENSG00000119801.13	YPEL5	chr2	+	30155814	30155910	30148244	30148541	30156627	30156787	27323	6,0	25,16	6,7	6,1	196	100	0.000393493457058	0.0103903512729	0.109,0.0	0.338,0.781	-0.505
30740	ENSG00000164022.18	AIMP1	chr4	+	106320865	106321451	106315695	106316344	106324984	106325118	30740	288,312	20,21	97,45	16,12	686	100	0.000393872864448	0.0103903512729	0.677,0.684	0.469,0.353	0.27
52590	ENSG00000104529.19	EEF1D	chr8	-	143590644	143590738	143589643	143590081	143597347	143597415	52590	18,7	55,52	0,0	9,4	194	100	0.000394803694566	0.0104083480309	0.144,0.065	0.0,0.0	0.104
49143	ENSG00000196352.18	CD55	chr1	+	207340390	207340508	207339396	207339417	207359545	207360501	49143	7,7	34,16	0,2	31,16	218	100	0.000397410445609	0.0104704772218	0.086,0.167	0.0,0.054	0.1
42765	ENSG00000149761.9	NUDT22	chr11	+	64227567	64227666	64226634	64227132	64229477	64229539	42765	9,11	2,3	3,1	0,0	199	100	0.000400248326648	0.0105386139592	0.693,0.648	1.0,1.0	-0.33
73522	ENSG00000171853.16	TRAPPC12	chr2	+	3466253	3466393	3465596	3465695	3478845	3478871	73522	6,6	3,1	6,2	0,0	240	100	0.000400611883835	0.0105415565787	0.455,0.714	1.0,1.0	-0.415
61526	ENSG00000175634.15	RPS6KB2	chr11	+	67428981	67429022	67428482	67428623	67429119	67429240	61526	64,33	7,1	85,48	0,0	141	100	0.000400965085488	0.0105442231809	0.866,0.959	1.0,1.0	-0.088
75793	ENSG00000142494.13	SLC47A1	chr17	+	19567095	19567228	19566789	19566859	19577326	19577597	75793	69,36	6,1	78,26	0,0	233	100	0.000403040660783	0.0105921514524	0.832,0.939	1.0,1.0	-0.115
40007	ENSG00000110011.14	DNAJC4	chr11	+	64231031	64231147	64230651	64230940	64231870	64231964	40007	0,0	11,9	3,4	8,0	216	100	0.000406258099174	0.010663319951	0.0,0.0	0.148,1.0	-0.574
40141	ENSG00000100058.14	CRYBB2P1	chr22	+	25455711	25455840	25448079	25448284	25457258	25457401	40141	57,41	1,12	69,22	0,1	229	100	0.000406096563233	0.010663319951	0.961,0.599	1.0,0.906	-0.173
26664	ENSG00000141867.19	BRD4	chr19	-	15268153	15268240	15267513	15267551	15268904	15269042	26664	10,11	146,180	22,19	64,168	187	100	0.000407398719703	0.0106865585215	0.035,0.032	0.155,0.057	-0.072
60952	ENSG00000149532.16	CPSF7	chr11	-	61421053	61421127	61420469	61420573	61421389	61421608	60952	7,9	82,52	16,8	38,6	174	100	0.000407926245937	0.0106936958586	0.047,0.09	0.195,0.434	-0.246
26962	ENSG00000118518.17	RNF146	chr6	+	127282286	127282395	127280230	127280340	127285207	127285348	26962	9,1	5,0	1,0	2,10	209	100	0.000410019933819	0.0107418551498	0.463,1.0	0.193,0.0	0.635
2426	ENSG00000160226.16	CFAP410	chr21	-	44335757	44335804	44333032	44333262	44337648	44337667	2426	12,16	2,4	7,3	0,0	147	100	0.000410564565915	0.01074267847	0.803,0.731	1.0,1.0	-0.233
11847	ENSG00000122566.22	HNRNPA2B1	chr7	-	26191421	26191650	26190992	26191128	26192494	26192577	11847	140,152	15,8	100,213	5,0	329	100	0.000410363277239	0.01074267847	0.739,0.852	0.859,1.0	-0.134
75891	ENSG00000087111.21	PIGS	chr17	-	28561421	28561629	28560048	28560191	28563430	28563522	75891	246,196	5,6	210,155	0,0	308	100	0.000411201707459	0.0107526292834	0.941,0.914	1.0,1.0	-0.073
77504	ENSG00000141577.14	CEP131	chr17	-	81192735	81192843	81192475	81192593	81193925	81194127	77504	69,68	5,5	74,51	1,0	208	100	0.000412181562594	0.010771523794	0.869,0.867	0.973,1.0	-0.118
12888	ENSG00000205436.8	EXOC3L4	chr14	+	103098617	103098918	103094724	103094840	103100203	103100613	12888	23,35	1,4	19,2	0,0	401	100	0.000412719391319	0.0107721304972	0.852,0.686	1.0,1.0	-0.231
70782	ENSG00000107959.17	PITRM1	chr10	-	3143605	3143731	3143388	3143501	3144291	3144366	70782	1,1	127,89	9,7	84,80	226	100	0.000412547201801	0.0107721304972	0.003,0.005	0.045,0.037	-0.037
21629	ENSG00000117691.10	NENF	chr1	+	212442564	212442625	212432919	212433120	212444338	212444442	21629	121,82	15,11	106,28	4,0	161	100	0.000413023717085	0.0107733569569	0.834,0.822	0.943,1.0	-0.144
11604	ENSG00000131584.19	ACAP3	chr1	-	1294401	1294628	1294089	1294199	1294717	1294816	11604	317,199	0,0	193,80	6,2	327	100	0.000413932478145	0.0107903382301	1.0,1.0	0.908,0.924	0.084
33290	ENSG00000143742.14	SRP9	chr1	+	225786861	225786985	225783299	225783368	225787970	225788266	33290	20,19	37,25	10,5	29,52	224	100	0.000414929538274	0.0108095987056	0.194,0.253	0.133,0.041	0.137
40053	ENSG00000134758.14	RNF138	chr18	+	32092699	32092886	32091873	32092235	32111753	32111919	40053	93,42	10,0	36,20	0,0	287	100	0.000415742654333	0.010824046159	0.764,1.0	1.0,1.0	-0.118
64674	ENSG00000174243.11	DDX23	chr12	-	48835119	48835990	48834319	48834497	48836120	48836266	64674	11,8	104,75	12,10	25,29	971	100	0.000417298313805	0.0108577960892	0.011,0.011	0.047,0.034	-0.03
9969	ENSG00000151914.22	DST	chr6	-	56617985	56620715	56614596	56617418	56624529	56624628	9969	209,222	8,2	358,422	2,0	2830	100	0.000418551999319	0.0108836518332	0.48,0.797	0.863,1.0	-0.293
28859	ENSG00000269556.9	TMEM185A	chrX	-	149611286	149611463	149608626	149608834	149631542	149631698	28859	18,19	3,2	25,17	0,0	277	100	0.000420420007181	0.0109254398514	0.684,0.774	1.0,1.0	-0.271
56122	ENSG00000165630.15	PRPF18	chr10	+	13613740	13613881	13611614	13611683	13614014	13614060	56122	148,70	3,0	112,105	6,10	241	100	0.000421438662148	0.0109451176122	0.953,1.0	0.886,0.813	0.127
74315	ENSG00000159593.15	NAE1	chr16	-	66813786	66813846	66810696	66810772	66816580	66816672	74315	162,129	6,5	164,217	0,0	160	100	0.000421782109236	0.0109472461272	0.944,0.942	1.0,1.0	-0.057
6470	ENSG00000124562.10	SNRPC	chr6	+	34757911	34757954	34757504	34757551	34762594	34762703	6470	2149,3171	19,17	733,2551	9,45	143	100	0.000423760513519	0.0109917806062	0.988,0.992	0.983,0.975	0.011
28377	ENSG00000196781.16	TLE1	chr9	-	81612291	81612393	81611805	81611959	81613376	81613521	28377	5,16	32,13	23,15	9,4	202	100	0.000425048390055	0.0110183596592	0.072,0.379	0.559,0.65	-0.379
25946	ENSG00000127526.15	SLC35E1	chr19	-	16568031	16568169	16565227	16566657	16571511	16571536	25946	83,72	0,0	13,27	1,4	238	100	0.000426066298754	0.0110332544547	1.0,1.0	0.845,0.739	0.208
48839	ENSG00000106077.19	ABHD11	chr7	-	73737875	73738072	73737567	73737735	73738327	73738463	48839	2,6	4,8	0,0	4,4	297	100	0.00042615006457	0.0110332544547	0.144,0.202	0.0,0.0	0.173
6316	ENSG00000119979.18	DENND10	chr10	+	119110192	119110314	119107967	119108164	119111848	119111928	6316	7,6	59,60	0,0	79,82	222	100	0.00042713115936	0.0110518207581	0.051,0.043	0.0,0.0	0.047
63395	ENSG00000197798.9	FAM118B	chr11	+	126229224	126229293	126211723	126211830	126234994	126235087	63395	23,21	0,0	32,7	6,0	169	100	0.000428336345278	0.0110761587987	1.0,1.0	0.759,1.0	0.121
62100	ENSG00000247137.9	ANKRD42-DT	chr11	-	83192427	83192541	83191062	83191168	83192735	83192792	62100	3,5	0,0	3,12	0,8	214	100	0.000430123784724	0.011115513733	1.0,1.0	1.0,0.412	0.294
64844	ENSG00000050426.16	LETMD1	chr12	+	51056143	51056245	51052091	51052207	51056349	51056428	64844	55,49	17,24	27,68	5,3	202	100	0.000430884047483	0.011128291578	0.616,0.503	0.728,0.918	-0.263
59358	ENSG00000177030.19	DEAF1	chr11	-	659434	659796	653961	654051	674535	674783	59358	24,8	38,28	8,0	44,19	462	100	0.000431809932261	0.0111453284921	0.12,0.058	0.038,0.0	0.07
15939	ENSG00000140688.17	RUSF1	chr16	-	31499301	31499407	31496848	31496950	31500685	31500731	15939	71,41	6,5	13,4	0,0	206	100	0.000432547247781	0.0111571982785	0.852,0.799	1.0,1.0	-0.174
32032	ENSG00000214087.9	ARL16	chr17	-	81683012	81683126	81682033	81682149	81683535	81683594	32032	58,38	8,1	15,13	0,0	214	100	0.000432890038666	0.0111571982785	0.772,0.947	1.0,1.0	-0.141
34180	ENSG00000089091.17	DZANK1	chr20	-	18452614	18452697	18448983	18449069	18453730	18453827	34180	6,5	2,2	1,9	0,0	183	100	0.000433069322884	0.0111571982785	0.621,0.577	1.0,1.0	-0.401
52639	ENSG00000180900.20	SCRIB	chr8	-	143807551	143807614	143806923	143807013	143808608	143809025	52639	187,135	23,19	98,21	4,0	163	100	0.000435898946663	0.0112231915142	0.833,0.813	0.938,1.0	-0.146
20300	ENSG00000032389.13	EIPR1	chr2	-	3257298	3257455	3214148	3214248	3338016	3338149	20300	130,88	0,2	109,59	7,4	257	100	0.000436558456465	0.0112332635402	1.0,0.945	0.858,0.852	0.117
7074	ENSG00000128581.17	IFT22	chr7	-	101318123	101319032	101316339	101316542	101321670	101321790	7074	29,31	1,3	23,24	0,0	1009	100	0.000438205055287	0.0112622253248	0.742,0.506	1.0,1.0	-0.376
23410	ENSG00000117601.15	SERPINC1	chr1	-	173915017	173915186	173914552	173914919	173917218	173917316	23410	14,19	142,154	18,14	55,44	269	100	0.00043822202446	0.0112622253248	0.035,0.044	0.108,0.106	-0.068
79284	ENSG00000105676.14	ARMC6	chr19	+	19037551	19037707	19033584	19033930	19042710	19042877	79284	1,3	20,8	2,2	1,0	256	100	0.00043869920581	0.0112675719333	0.019,0.128	0.439,1.0	-0.646
21883	ENSG00000149150.9	SLC43A1	chr11	-	57491715	57491862	57489250	57489392	57493992	57494171	21883	94,111	12,34	62,30	2,2	247	100	0.00044036913409	0.0112966015923	0.76,0.569	0.926,0.859	-0.228
30884	ENSG00000067208.16	EVI5	chr1	-	92663419	92663452	92636201	92636336	92665938	92665955	30884	7,12	10,13	25,29	10,2	133	100	0.000440215519665	0.0112966015923	0.345,0.41	0.653,0.916	-0.407
27727	ENSG00000162927.14	PUS10	chr2	-	61010655	61010888	61008780	61009015	61011764	61011905	27727	38,34	116,106	45,83	91,100	333	100	0.000441377441729	0.0113086086891	0.09,0.088	0.129,0.2	-0.076
65023	ENSG00000012822.16	CALCOCO1	chr12	-	53712774	53712846	53711118	53712121	53713099	53713206	65023	1,2	33,35	2,5	5,1	172	100	0.000441202985302	0.0113086086891	0.017,0.032	0.189,0.744	-0.442
14964	ENSG00000204344.16	STK19	chr6	+	31972620	31972757	31971868	31972511	31978902	31978998	14964	135,111	6,5	60,42	0,0	237	100	0.000441959028393	0.0113165839289	0.905,0.904	1.0,1.0	-0.095
26665	ENSG00000141867.19	BRD4	chr19	-	15268153	15268281	15267415	15267551	15268904	15269042	26665	16,10	146,180	23,24	64,168	228	100	0.000443421004874	0.0113470784652	0.046,0.024	0.136,0.059	-0.063
59665	ENSG00000100429.18	HDAC10	chr22	-	50250426	50250523	50250062	50250160	50250770	50250905	59665	41,36	6,1	44,8	0,0	197	100	0.000443883424593	0.0113519728592	0.776,0.948	1.0,1.0	-0.138
16637	ENSG00000099219.15	ERMP1	chr9	-	5825091	5825219	5821917	5824001	5830726	5831028	16637	59,67	6,2	51,24	0,0	228	100	0.000444723721881	0.0113665193019	0.812,0.936	1.0,1.0	-0.126
78238	ENSG00000141644.18	MBD1	chr18	-	50274185	50274353	50273563	50273863	50275128	50275245	78238	54,31	0,0	13,9	12,0	268	100	0.00044611746593	0.0113951846926	1.0,1.0	0.288,1.0	0.356
72790	ENSG00000103148.17	NPRL3	chr16	-	130521	130591	119125	119255	138149	138334	72790	38,23	0,1	24,17	2,5	170	100	0.000449391674097	0.0114718185586	1.0,0.931	0.876,0.667	0.194
79385	ENSG00000105750.15	ZNF85	chr19	+	20946299	20946389	20934948	20935047	20948743	20948791	79385	0,1	8,10	2,5	6,4	190	100	0.000450176861924	0.0114848594299	0.0,0.05	0.149,0.397	-0.248
39530	ENSG00000119321.10	FKBP15	chr9	-	113211476	113211592	113206926	113207296	113221190	113221275	39530	97,109	7,2	73,108	0,0	216	100	0.000451046127074	0.0115000280816	0.865,0.962	1.0,1.0	-0.087
6479	ENSG00000178826.11	TMEM139	chr7	+	143285347	143285445	143284956	143284998	143285940	143286202	6479	8,13	2,3	3,3	0,0	198	100	0.000451988990967	0.0115170536256	0.669,0.686	1.0,1.0	-0.323
63669	ENSG00000111206.13	FOXM1	chr12	-	2864884	2864945	2864682	2864755	2865354	2865399	63669	11,12	36,55	3,4	48,67	161	100	0.000454879098808	0.011583645664	0.16,0.119	0.037,0.036	0.103
68799	ENSG00000108590.11	MED31	chr17	-	6649981	6650078	6643310	6644659	6650355	6650433	68799	34,25	0,1	22,33	3,5	197	100	0.000455390939853	0.0115896302109	1.0,0.927	0.788,0.77	0.184
50450	ENSG00000144381.18	HSPD1	chr2	-	197490937	197491042	197490526	197490664	197493323	197493492	50450	3,1	0,1	0,1	6,0	205	100	0.0004567146467	0.0116162567947	1.0,0.328	0.0,1.0	0.164
66297	ENSG00000109180.15	OCIAD1	chr4	+	48831226	48831398	48831043	48831141	48832619	48832682	66297	12,18	2,3	3,5	0,0	272	100	0.000457004236381	0.0116165648792	0.688,0.688	1.0,1.0	-0.312
20533	ENSG00000155111.15	CDK19	chr6	-	110746125	110746201	110670430	110670541	110815008	110815209	20533	46,35	8,0	27,43	0,0	176	100	0.000458373778718	0.0116372457526	0.766,1.0	1.0,1.0	-0.117
27746	ENSG00000008394.13	MGST1	chr12	+	16357604	16357699	16354230	16354378	16363794	16363806	27746	2208,2040	48,29	1486,2058	11,18	195	100	0.000458113431529	0.0116372457526	0.959,0.973	0.986,0.983	-0.018
44938	ENSG00000141258.13	SGSM2	chr17	+	2367270	2367405	2365214	2365341	2371261	2371415	44938	101,94	40,44	70,28	4,6	235	100	0.000459337243726	0.0116481032414	0.518,0.476	0.882,0.665	-0.277
46757	ENSG00000120685.20	PROSER1	chr13	-	39024472	39024556	39017499	39017544	39026276	39026387	46757	93,114	8,2	47,105	0,0	184	100	0.000459914359442	0.0116481032414	0.863,0.969	1.0,1.0	-0.084
53243	ENSG00000140463.14	BBS4	chr15	+	72727939	72727994	72724527	72724655	72731304	72731457	53243	35,39	8,0	32,41	0,0	155	100	0.000459400301297	0.0116481032414	0.738,1.0	1.0,1.0	-0.131
71471	ENSG00000104047.15	DTWD1	chr15	+	49632158	49632302	49625112	49625431	49634535	49634730	71471	53,48	0,0	49,70	0,8	244	100	0.000459779245276	0.0116481032414	1.0,1.0	1.0,0.782	0.109
17476	ENSG00000177239.16	MAN1B1	chr9	+	137088267	137088398	137088074	137088183	137088868	137089005	17476	1,5	131,154	15,0	66,57	231	100	0.000460914443692	0.0116663743562	0.003,0.014	0.09,0.0	-0.036
18863	ENSG00000133657.17	ATP13A3	chr3	-	194457093	194457174	194455892	194455962	194459470	194459541	18863	154,84	5,8	74,81	1,0	181	100	0.000461600385447	0.011673086006	0.944,0.853	0.976,1.0	-0.09
32434	ENSG00000087157.19	PGS1	chr17	+	78400676	78400855	78399288	78399537	78403567	78403679	32434	102,84	4,5	59,32	0,0	279	100	0.000461737260861	0.011673086006	0.901,0.858	1.0,1.0	-0.121
76721	ENSG00000136305.12	CIDEB	chr14	-	24305946	24306137	24305186	24305765	24306373	24306523	76721	851,765	14,9	664,486	3,0	291	100	0.000462702132355	0.0116904192945	0.954,0.967	0.987,1.0	-0.033
59427	ENSG00000114023.16	FAM162A	chr3	+	122401375	122401535	122384175	122384299	122402759	122402882	59427	65,48	636,757	44,47	724,1409	260	100	0.000463014407437	0.0116912534182	0.038,0.024	0.023,0.013	0.013
40693	ENSG00000243147.8	MRPL33	chr2	+	27774423	27774530	27772673	27772692	27779432	27779697	40693	840,760	231,194	856,1042	171,142	207	100	0.000465422019458	0.0117449625344	0.637,0.654	0.707,0.78	-0.098
51803	ENSG00000264538.7	SUZ12P1	chr17	+	30743300	30743369	30735032	30735097	30759490	30759539	51803	26,16	4,6	16,12	0,1	169	100	0.000468799176606	0.0118230587522	0.794,0.612	1.0,0.877	-0.235
14174	ENSG00000173905.9	GOLIM4	chr3	-	168040785	168040869	168036835	168036994	168041391	168041474	14174	196,221	4,3	110,172	13,7	184	100	0.000471025552578	0.0118673056212	0.964,0.976	0.821,0.93	0.095
76178	ENSG00000278259.5	MYO19	chr17	-	36515112	36515182	36514445	36514548	36515857	36515990	76178	57,50	10,6	119,51	2,3	170	100	0.000471120552787	0.0118673056212	0.77,0.831	0.972,0.909	-0.14
18552	ENSG00000127419.17	TMEM175	chr4	+	947708	947892	932386	932540	950420	950518	18552	20,22	1,4	2,8	0,0	284	100	0.000471561429792	0.0118688012288	0.876,0.659	1.0,1.0	-0.232
24367	ENSG00000164548.12	TRA2A	chr7	-	23522353	23522432	23521706	23521840	23531788	23532023	24367	107,173	22,20	115,317	6,18	179	100	0.000471746930485	0.0118688012288	0.731,0.829	0.915,0.908	-0.131
5970	ENSG00000144741.19	SLC25A26	chr3	+	66362859	66362929	66263331	66263379	66369477	66369542	5970	13,8	5,1	20,17	1,0	170	100	0.000474219269295	0.0119238376631	0.605,0.825	0.922,1.0	-0.246
65379	ENSG00000175215.11	CTDSP2	chr12	-	57826995	57827123	57826345	57826402	57827551	57827590	65379	205,157	0,0	204,230	4,8	228	100	0.000474728342819	0.0119294730325	1.0,1.0	0.957,0.927	0.058
14013	ENSG00000171862.13	PTEN	chr10	+	87925512	87925557	87894024	87894109	87931045	87931089	14013	646,591	5,5	451,865	8,26	145	100	0.00047666324212	0.0119381242702	0.989,0.988	0.975,0.958	0.022
19425	ENSG00000214021.17	TTLL3	chr3	+	9833103	9833273	9828959	9829395	9834680	9835096	19425	16,20	80,137	2,0	24,37	270	100	0.0004756494471	0.0119381242702	0.069,0.051	0.03,0.0	0.045
28480	ENSG00000078319.12	PMS2P1	chr7	-	100328835	100329194	100320912	100321084	100330181	100330284	28480	69,68	7,0	53,56	0,0	459	100	0.000476783560963	0.0119381242702	0.682,1.0	1.0,1.0	-0.159
42133	ENSG00000167792.13	NDUFV1	chr11	+	67607365	67607496	67606932	67607076	67608399	67608478	42133	3,2	3,1	0,0	3,1	231	100	0.0004764250705	0.0119381242702	0.302,0.464	0.0,0.0	0.383
69813	ENSG00000119686.10	FLVCR2	chr14	+	75624611	75624752	75622057	75622220	75633628	75633696	69813	91,130	0,14	31,34	0,0	241	100	0.000475743508484	0.0119381242702	1.0,0.794	1.0,1.0	-0.103
76053	ENSG00000163625.16	WDFY3	chr4	-	84844455	84844509	84841191	84841263	84849901	84850015	76053	1,6	83,92	4,12	35,48	154	100	0.000476556339396	0.0119381242702	0.008,0.041	0.069,0.14	-0.08
22129	ENSG00000183844.17	FAM3B	chr21	+	41346208	41346407	41345685	41345736	41347012	41347100	22129	67,57	376,333	73,63	220,207	299	100	0.000477749666002	0.011948022561	0.056,0.054	0.1,0.092	-0.041
76526	ENSG00000065268.11	WDR18	chr19	+	994019	994088	991954	992121	994212	994554	76526	171,105	0,0	158,78	8,2	169	100	0.000477733081091	0.011948022561	1.0,1.0	0.921,0.958	0.06
45803	ENSG00000144535.20	DIS3L2	chr2	+	232259840	232260685	232249238	232249346	232263206	232263440	45803	10,3	67,48	29,14	67,57	945	100	0.000479036064566	0.0119730416973	0.016,0.007	0.044,0.025	-0.023
15408	ENSG00000106397.12	PLOD3	chr7	-	101207577	101207724	101206778	101206904	101208852	101208957	15408	331,219	8,6	299,142	1,0	247	100	0.0004834215847	0.0120682436753	0.944,0.937	0.992,1.0	-0.055
26419	ENSG00000204084.13	INPP5B	chr1	-	37882806	37882918	37880084	37880194	37885637	37885825	26419	44,33	4,3	33,27	0,0	212	100	0.000483249320103	0.0120682436753	0.838,0.838	1.0,1.0	-0.162
20585	ENSG00000166169.17	POLL	chr10	-	101585861	101586156	101584610	101584919	101587245	101587382	20585	56,30	6,0	18,13	0,0	395	100	0.00048478733309	0.0120834657908	0.703,1.0	1.0,1.0	-0.149
42960	ENSG00000150722.11	PPP1R1C	chr2	+	181987817	181987899	181975218	181975264	182061441	182061479	42960	11,9	59,81	1,2	34,70	182	100	0.000485257888268	0.0120834657908	0.093,0.058	0.016,0.015	0.06
45273	ENSG00000178440.8	TIMM23B-AGAP6	chr10	+	49976083	49976185	49973011	49973142	49981188	49981370	45273	2,3	18,15	10,10	12,1	202	100	0.000485474488477	0.0120834657908	0.052,0.09	0.292,0.832	-0.491
61970	ENSG00000171103.11	TRMT61B	chr2	-	28865016	28865119	28852407	28852499	28869578	28870295	61970	31,54	0,0	24,39	4,2	203	100	0.000485384666292	0.0120834657908	1.0,1.0	0.747,0.906	0.173
67215	ENSG00000143393.17	PI4KB	chr1	-	151293399	151293462	151292601	151293033	151294017	151294138	67215	0,0	15,12	7,0	15,6	163	100	0.000485037135921	0.0120834657908	0.0,0.0	0.223,0.0	-0.112
1574	ENSG00000100372.15	SLC25A17	chr22	-	40799022	40799083	40779008	40779125	40819194	40819326	1574	34,15	2,4	12,3	0,0	161	100	0.000487141725431	0.0121177589633	0.913,0.7	1.0,1.0	-0.194
45546	ENSG00000168958.20	MFF	chr2	+	227352513	227352573	227340291	227340380	227355676	227355761	45546	119,126	180,107	86,157	282,290	160	100	0.000488075314149	0.0121337725813	0.292,0.424	0.16,0.253	0.151
29134	ENSG00000079819.19	EPB41L2	chr6	-	130872370	130872538	130869851	130870126	130878103	130878214	29134	28,26	60,37	10,19	64,71	268	100	0.000489403066007	0.0121595604501	0.148,0.208	0.055,0.091	0.105
24832	ENSG00000119688.21	ABCD4	chr14	-	74300149	74300268	74297638	74298069	74302874	74302918	24832	78,73	6,3	49,26	0,0	219	100	0.00049344140269	0.0122518841795	0.856,0.917	1.0,1.0	-0.113
37554	ENSG00000197323.12	TRIM33	chr1	-	114420379	114420451	114410183	114410316	114421435	114421636	37554	32,35	227,282	26,13	67,51	172	100	0.000493996906604	0.0122518841795	0.076,0.067	0.184,0.129	-0.085
63362	ENSG00000150433.10	TMEM218	chr11	-	125110490	125110549	125102733	125102809	125111538	125111589	63362	3,3	8,5	0,0	10,3	159	100	0.000493747878965	0.0122518841795	0.191,0.274	0.0,0.0	0.233
54658	ENSG00000074582.15	BCS1L	chr2	+	218660036	218660166	218659713	218659743	218660938	218661307	54658	27,35	3,3	24,53	0,0	230	100	0.000494662286856	0.0122611229362	0.796,0.835	1.0,1.0	-0.184
1638	ENSG00000184381.20	PLA2G6	chr22	-	38139981	38140169	38134987	38135084	38143104	38143288	1638	21,37	0,6	18,7	0,0	288	100	0.000495479537948	0.0122741129327	1.0,0.682	1.0,1.0	-0.159
24898	ENSG00000140386.13	SCAPER	chr15	-	76857808	76857879	76841733	76841931	76862415	76862533	24898	21,25	0,0	20,71	6,2	171	100	0.000498256403694	0.0123356028035	1.0,1.0	0.661,0.954	0.193
57640	ENSG00000245937.10	SLC12A2-DT	chr5	-	128081972	128082194	128061143	128061244	128082734	128082960	57640	7,13	0,6	0,4	2,13	322	100	0.000500207596436	0.0123701909933	1.0,0.402	0.0,0.087	0.658
60942	ENSG00000149476.16	TKFC	chr11	+	61335839	61335937	61333548	61334731	61337940	61338083	60942	3,2	70,39	16,6	87,21	198	100	0.000500244436921	0.0123701909933	0.021,0.025	0.085,0.126	-0.083
56120	ENSG00000165630.15	PRPF18	chr10	+	13591767	13591888	13586938	13587152	13597457	13597535	56120	72,99	97,220	42,37	98,198	221	100	0.000501062498611	0.0123831059648	0.251,0.169	0.162,0.078	0.09
78622	ENSG00000130332.15	LSM7	chr19	-	2325979	2326139	2324124	2324192	2328386	2328477	78622	10,5	46,26	3,0	50,36	260	100	0.000502054220922	0.012400294961	0.077,0.069	0.023,0.0	0.062
74807	ENSG00000181555.22	SETD2	chr3	-	47105996	47106120	47097954	47098081	47113875	47114004	74807	48,47	2,0	30,38	4,6	224	100	0.000505898576366	0.0124878796578	0.915,1.0	0.77,0.739	0.203
62386	ENSG00000166012.17	TAF1D	chr11	-	93733349	93733397	93732243	93732291	93734624	93734660	62386	84,66	3,6	68,108	0,0	148	100	0.000507443616578	0.0125186370112	0.95,0.881	1.0,1.0	-0.085
29110	ENSG00000155363.19	MOV10	chr1	+	112686965	112687106	112674736	112675049	112688934	112689138	29110	34,27	28,23	35,45	12,9	241	100	0.000511125181713	0.0126020351781	0.335,0.328	0.548,0.675	-0.28
55123	ENSG00000077157.22	PPP1R12B	chr1	+	202562777	202562922	202496780	202496822	202564442	202564479	55123	15,20	0,0	16,8	6,0	245	100	0.000512668509952	0.0126326469506	1.0,1.0	0.521,1.0	0.24
36149	ENSG00000164002.12	EXO5	chr1	+	40509457	40509625	40508760	40508908	40509732	40509790	36149	50,48	8,7	62,50	0,3	268	100	0.000515766258592	0.0127015025976	0.7,0.719	1.0,0.861	-0.221
75017	ENSG00000172530.22	BANP	chr16	+	88004294	88004411	87984059	87984259	88006089	88006265	75017	47,32	2,0	9,24	5,3	217	100	0.000517955093662	0.0127479071112	0.915,1.0	0.453,0.787	0.338
66893	ENSG00000196498.14	NCOR2	chr12	-	124340601	124340751	124340293	124340443	124341822	124342074	66893	378,387	13,7	118,185	1,0	250	100	0.000525079775923	0.0129156667562	0.921,0.957	0.979,1.0	-0.05
54665	ENSG00000074582.15	BCS1L	chr2	+	218660306	218660482	218659716	218659743	218660938	218661307	54665	41,37	3,3	63,35	0,0	276	100	0.000526463480319	0.0129420984166	0.832,0.817	1.0,1.0	-0.175
56928	ENSG00000172671.20	ZFAND4	chr10	-	45652983	45653059	45651965	45652033	45663541	45663842	56928	34,32	24,14	9,21	33,27	176	100	0.000526902774033	0.0129452961472	0.446,0.565	0.134,0.306	0.285
16280	ENSG00000174720.18	LARP7	chr4	+	112638617	112638673	112637146	112637239	112644667	112644699	16280	19,2	209,104	5,3	293,190	156	100	0.000529290240486	0.0129963260516	0.055,0.012	0.011,0.01	0.023
52583	ENSG00000104529.19	EEF1D	chr8	-	143590607	143590735	143589694	143590081	143597347	143597415	52583	13,12	55,52	0,0	9,4	228	100	0.000532292282833	0.0130623777379	0.094,0.092	0.0,0.0	0.093
1120	ENSG00000123130.17	ACOT9	chrX	-	23734340	23734367	23733171	23733217	23735918	23736016	1120	13,25	65,74	45,41	77,59	127	100	0.000532854138039	0.013068505266	0.136,0.21	0.315,0.354	-0.162
33571	ENSG00000214595.13	EML6	chr2	+	54966722	54966880	54964570	54964733	54966999	54967231	33571	28,31	8,8	14,4	1,0	258	100	0.000533818633901	0.0130844947941	0.576,0.6	0.844,1.0	-0.334
34050	ENSG00000143740.15	SNAP47	chr1	+	227731584	227731747	227728538	227728786	227747691	227748233	34050	7,4	0,0	7,0	0,7	263	100	0.00053600395152	0.0131303718142	1.0,1.0	1.0,0.0	0.5
68491	ENSG00000113360.17	DROSHA	chr5	-	31531449	31531525	31530797	31530924	31531989	31532074	68491	58,74	24,21	88,51	14,0	176	100	0.000538382167095	0.0131809177927	0.579,0.667	0.781,1.0	-0.268
64142	ENSG00000247498.11	GPRC5D-AS1	chr12	+	12966758	12966897	12927763	12927803	12979523	12979622	64142	3,5	11,8	1,0	13,19	239	100	0.000540312868362	0.0132204548416	0.102,0.207	0.031,0.0	0.139
39533	ENSG00000177683.14	THAP5	chr7	-	108565829	108566022	108562131	108565105	108569098	108569453	39533	28,35	0,0	26,39	0,6	293	100	0.000541476627829	0.0132411910187	1.0,1.0	1.0,0.689	0.155
35915	ENSG00000117155.17	SSX2IP	chr1	-	84649670	84649948	84647338	84647607	84650361	84650527	35915	6,4	9,5	1,0	10,5	378	100	0.000542695397211	0.0132632474047	0.15,0.175	0.026,0.0	0.149
65748	ENSG00000141027.22	NCOR1	chr17	-	16061757	16061894	16058470	16058599	16062104	16062270	65748	36,36	0,0	20,37	0,6	237	100	0.000543015907463	0.0132633377864	1.0,1.0	1.0,0.722	0.139
53105	ENSG00000111731.13	C2CD5	chr12	-	22519114	22519239	22513293	22513379	22523425	22523624	53105	4,2	5,2	0,0	5,1	225	100	0.000543696413121	0.013272215939	0.262,0.308	0.0,0.0	0.285
3748	ENSG00000282826.4	FRG1CP	chr20	-	28591393	28591541	28588642	28588757	28600391	28600461	3748	138,171	6,7	123,298	1,2	248	100	0.000544304902392	0.0132793267708	0.903,0.908	0.98,0.984	-0.077
1620	ENSG00000100201.23	DDX17	chr22	-	38489227	38489458	38488025	38488115	38492055	38492115	1620	53,49	577,658	33,81	328,404	331	100	0.000545839534217	0.0133026568326	0.027,0.022	0.029,0.057	-0.019
47841	ENSG00000132854.19	KANK4	chr1	-	62247471	62247672	62236164	62238381	62253066	62253209	47841	140,67	6,4	38,15	0,0	301	100	0.000545896678332	0.0133026568326	0.886,0.848	1.0,1.0	-0.133
48772	ENSG00000204536.15	CCHCR1	chr6	-	31148891	31148987	31148617	31148728	31150065	31150215	48772	7,11	92,71	1,1	93,28	196	100	0.00054703376127	0.013322611062	0.037,0.073	0.005,0.018	0.043
41837	ENSG00000006704.11	GTF2IRD1	chr7	+	74555437	74555494	74555173	74555223	74557638	74557722	41837	73,64	7,2	41,48	0,0	157	100	0.000547385803571	0.0133234341084	0.869,0.953	1.0,1.0	-0.089
46758	ENSG00000120685.20	PROSER1	chr13	-	39034130	39034196	39031562	39031631	39037197	39037294	46758	67,54	0,4	71,38	6,18	166	100	0.00054968104578	0.0133715264274	1.0,0.891	0.877,0.56	0.227
16846	ENSG00000138668.19	HNRNPD	chr4	-	82354894	82355001	82353833	82354154	82355303	82355401	16846	35,43	142,121	11,16	99,112	207	100	0.000554859035235	0.0134896477991	0.106,0.147	0.051,0.065	0.069
73866	ENSG00000168734.14	PKIG	chr20	+	44582584	44582731	44531784	44531978	44589796	44589866	73866	21,17	126,106	32,14	51,52	247	100	0.00055750324696	0.0135460669959	0.063,0.061	0.203,0.098	-0.089
44104	ENSG00000128595.17	CALU	chr7	+	128754261	128754455	128748572	128748804	128754528	128754722	44104	1761,1541	1073,1085	2123,2232	834,1145	294	100	0.000561008216374	0.0136154254948	0.358,0.326	0.464,0.399	-0.09
53802	ENSG00000156413.15	FUT6	chr19	-	5834839	5835077	5832367	5832579	5838676	5838790	53802	19,11	14,8	13,10	2,0	338	100	0.000560749943156	0.0136154254948	0.286,0.289	0.658,1.0	-0.541
62358	ENSG00000166004.15	CEP295	chr11	+	93724253	93724375	93722501	93723289	93725650	93725831	62358	24,29	2,4	14,13	0,0	222	100	0.000561815579935	0.0136271200776	0.844,0.766	1.0,1.0	-0.195
34386	ENSG00000138802.11	SEC24B	chr4	+	109481676	109481781	109473003	109473186	109491326	109491407	34386	120,121	35,35	90,145	8,21	205	100	0.000562702050843	0.0136407187948	0.626,0.628	0.846,0.771	-0.181
9375	ENSG00000100099.22	HPS4	chr22	-	26466050	26466104	26465454	26465551	26466225	26466262	9375	10,7	16,6	17,17	3,5	154	100	0.000563432817348	0.013650529455	0.289,0.431	0.786,0.688	-0.377
251	ENSG00000241489.8	ENSG00000241489	chrX	-	149526935	149527068	149500948	149501037	149529366	149529428	251	16,20	4,1	37,16	0,0	233	100	0.000566892319491	0.0137042237951	0.632,0.896	1.0,1.0	-0.236
35071	ENSG00000185246.18	PRPF39	chr14	+	45096423	45096758	45096102	45096228	45096886	45097005	35071	148,183	31,47	94,130	44,60	435	100	0.000566167584491	0.0137042237951	0.523,0.472	0.329,0.332	0.167
71744	ENSG00000100867.15	DHRS2	chr14	+	23639178	23639356	23636363	23636772	23643151	23643219	71744	1811,1230	110,74	833,232	13,14	278	100	0.000566958452479	0.0137042237951	0.856,0.857	0.958,0.856	-0.05
76309	ENSG00000263002.8	ZNF234	chr19	+	44150412	44150505	44148770	44148897	44156251	44158119	76309	36,32	0,0	23,37	7,0	193	100	0.000566728730739	0.0137042237951	1.0,1.0	0.63,1.0	0.185
38459	ENSG00000259153.4	MAP3K9-DT	chr14	+	70814226	70814359	70809941	70810674	70815110	70815386	38459	8,0	11,4	0,0	4,8	233	100	0.00057016533509	0.0137737863552	0.238,0.0	0.0,0.0	0.119
68710	ENSG00000169189.17	NSMCE1	chr16	-	27268162	27268374	27257434	27257581	27268705	27268723	68710	53,44	83,59	69,36	51,19	312	100	0.000571005001802	0.0137861155712	0.17,0.193	0.302,0.378	-0.158
72504	ENSG00000140525.20	FANCI	chr15	+	89306006	89306194	89305604	89305698	89307475	89307529	72504	188,136	2,0	108,68	8,1	288	100	0.000571405227529	0.0137878270032	0.97,1.0	0.824,0.959	0.094
74908	ENSG00000103168.17	TAF1C	chr16	-	84183071	84183149	84182201	84182440	84183243	84183333	74908	36,20	2,4	11,14	0,0	178	100	0.000573604612576	0.0138329245999	0.91,0.737	1.0,1.0	-0.176
27165	ENSG00000077782.22	FGFR1	chr8	-	38423024	38423175	38421796	38421941	38424508	38424699	27165	88,106	303,262	90,41	112,85	251	100	0.000575437368232	0.013869133806	0.104,0.139	0.243,0.161	-0.081
23582	ENSG00000000457.14	SCYL3	chr1	-	169864368	169864508	169862612	169862797	169866895	169866973	23582	7,3	0,0	8,8	2,2	240	100	0.000576655869718	0.0138754721816	1.0,1.0	0.625,0.625	0.375
59565	ENSG00000148985.20	PGAP2	chr11	+	3824795	3825128	3824269	3824376	3825327	3825753	59565	62,40	6,0	21,7	0,0	433	100	0.00057665948641	0.0138754721816	0.705,1.0	1.0,1.0	-0.147
64451	ENSG00000119509.13	INVS	chr9	+	100214924	100215040	100131869	100131954	100226061	100226213	64451	4,7	5,2	0,1	2,3	216	100	0.000576694651762	0.0138754721816	0.27,0.618	0.0,0.134	0.377
38760	ENSG00000138095.20	LRPPRC	chr2	-	43895367	43895566	43894544	43894629	43896633	43896708	38760	3,6	183,129	15,18	173,165	299	100	0.000577082713003	0.013876833877	0.005,0.015	0.028,0.035	-0.021
37250	ENSG00000161526.15	SAP30BP	chr17	+	75671815	75671863	75668515	75668625	75693439	75693482	37250	216,179	10,4	185,187	1,0	148	100	0.000584673758914	0.0140351874524	0.936,0.968	0.992,1.0	-0.044
46683	ENSG00000177463.16	NR2C2	chr3	+	14959156	14959196	14947704	14947906	15003875	15003986	46683	0,1	35,29	0,10	24,24	140	100	0.000584629039817	0.0140351874524	0.0,0.024	0.0,0.229	-0.103
70017	ENSG00000170234.13	PWWP2A	chr5	-	160080650	160080770	160075881	160078168	160089505	160089610	70017	21,12	4,1	3,4	0,0	220	100	0.000584646798683	0.0140351874524	0.705,0.845	1.0,1.0	-0.225
8276	ENSG00000104325.7	DECR1	chr8	+	90005447	90005845	90001476	90001561	90015540	90015666	8276	9,1	8,2	22,2	2,0	498	100	0.000585932108351	0.0140573339347	0.184,0.091	0.688,1.0	-0.706
63166	ENSG00000154114.13	TBCEL	chr11	+	121036504	121036612	121024101	121024291	121045673	121045823	63166	5,7	1,3	8,2	0,0	208	100	0.000586738993402	0.0140686299878	0.706,0.529	1.0,1.0	-0.383
29132	ENSG00000079819.19	EPB41L2	chr6	-	130870327	130870381	130869658	130870126	130885095	130885268	29132	13,9	96,110	11,9	352,273	154	100	0.000590379595304	0.0141418777272	0.081,0.05	0.02,0.021	0.045
33315	ENSG00000136682.16	CBWD2	chr2	+	113457064	113457209	113454740	113454778	113460672	113460719	33315	10,10	51,63	11,5	158,178	245	100	0.000590469419974	0.0141418777272	0.074,0.061	0.028,0.011	0.048
74526	ENSG00000102908.23	NFAT5	chr16	+	69568494	69568548	69565093	69566374	69626402	69626528	74526	22,19	3,21	6,10	1,0	154	100	0.000591682196962	0.0141628217129	0.826,0.37	0.796,1.0	-0.3
26637	ENSG00000049192.15	ADAMTS6	chr5	-	65473576	65473952	65470777	65471142	65481342	65481417	26637	38,23	0,0	29,26	6,0	476	100	0.00059214826777	0.0141658784173	1.0,1.0	0.504,1.0	0.248
73814	ENSG00000167397.15	VKORC1	chr16	-	31092782	31092864	31090841	31091342	31093311	31093421	73814	3,0	295,234	16,6	227,181	182	100	0.000593398411801	0.0141876781896	0.006,0.0	0.037,0.018	-0.024
48793	ENSG00000114423.23	CBLB	chr3	-	105681478	105681610	105678430	105678571	105681723	105681818	48793	166,259	8,14	104,107	16,15	232	100	0.000597066106193	0.0142449903967	0.899,0.889	0.737,0.755	0.148
49585	ENSG00000015479.20	MATR3	chr5	+	139307238	139308327	139293729	139293805	139314674	139314736	49585	3880,3385	16,12	3745,3999	6,3	1189	100	0.000596364395642	0.0142449903967	0.953,0.96	0.981,0.991	-0.03
61562	ENSG00000110719.11	TCIRG1	chr11	+	68039791	68039962	68039105	68039119	68041267	68041388	61562	11,3	6,0	18,2	0,0	271	100	0.000597216162521	0.0142449903967	0.404,1.0	1.0,1.0	-0.298
65210	ENSG00000181852.18	RNF41	chr12	-	56212995	56213138	56210247	56210568	56213957	56214018	65210	3,3	16,15	14,3	8,4	243	100	0.000596966429498	0.0142449903967	0.072,0.076	0.419,0.236	-0.254
66264	ENSG00000075856.12	SART3	chr12	-	108544426	108544532	108543027	108543152	108545138	108545323	66264	139,103	0,2	29,83	0,9	206	100	0.000597496790556	0.0142449903967	1.0,0.962	1.0,0.817	0.073
11403	ENSG00000164850.16	GPER1	chr7	+	1088197	1088321	1086806	1087244	1091406	1091949	11403	29,13	25,10	14,4	1,1	224	100	0.00059983256053	0.0142600739049	0.341,0.367	0.862,0.641	-0.398
14523	ENSG00000183666.19	GUSBP1	chr5	+	21491320	21491508	21461782	21461866	21495097	21495182	14523	60,65	5,2	34,20	0,0	288	100	0.000599611088879	0.0142600739049	0.806,0.919	1.0,1.0	-0.137
17918	ENSG00000173482.17	PTPRM	chr18	+	8253226	8253414	8247844	8247919	8296367	8296455	17918	120,103	8,3	125,138	2,0	288	100	0.000599822898353	0.0142600739049	0.839,0.923	0.956,1.0	-0.097
34531	ENSG00000163291.14	PAQR3	chr4	-	78922140	78922421	78917939	78920681	78923856	78923947	34531	12,6	15,10	0,3	5,19	381	100	0.000599048088158	0.0142600739049	0.174,0.136	0.0,0.04	0.135
57112	ENSG00000148584.15	A1CF	chr10	-	50862888	50862981	50859841	50859985	50864032	50864080	57112	5,4	15,16	12,4	5,3	193	100	0.000598729991694	0.0142600739049	0.147,0.115	0.554,0.409	-0.351
33619	ENSG00000068745.15	IP6K2	chr3	-	48694458	48694525	48693452	48694240	48695089	48695421	33619	34,20	45,96	3,0	21,15	167	100	0.000600447196907	0.0142665845054	0.311,0.111	0.079,0.0	0.171
6483	ENSG00000178826.11	TMEM139	chr7	+	143285940	143286202	143284956	143284998	143286423	143287296	6483	36,44	3,3	21,15	0,0	362	100	0.000601755805566	0.0142895671015	0.768,0.802	1.0,1.0	-0.215
1812	ENSG00000198089.16	SFI1	chr22	+	31602211	31602293	31589446	31589577	31604308	31604404	1812	12,15	3,2	8,11	0,0	182	100	0.000603826537362	0.0143306111035	0.687,0.805	1.0,1.0	-0.254
8674	ENSG00000111144.10	LTA4H	chr12	-	96003837	96003981	96002989	96003064	96006313	96006409	8674	662,700	133,146	646,1023	80,132	244	100	0.000607342073499	0.0143977213517	0.671,0.663	0.768,0.761	-0.097
71867	ENSG00000259316.12	ENSG00000259316	chr15	-	64342542	64342685	64300318	64300723	64365985	64366075	71867	7,6	5,3	1,0	2,2	243	100	0.000607082759936	0.0143977213517	0.366,0.451	0.171,0.0	0.323
32317	ENSG00000093144.19	ECHDC1	chr6	-	127330808	127331030	127326880	127327144	127343335	127343358	32317	181,159	2,8	133,52	0,0	322	100	0.000609538367591	0.0144416093714	0.966,0.861	1.0,1.0	-0.087
14689	ENSG00000168487.20	BMP1	chr8	+	22195461	22195587	22194723	22194919	22196679	22196840	14689	54,45	4,4	11,6	0,0	226	100	0.000613745242162	0.0145325576943	0.857,0.833	1.0,1.0	-0.155
21580	ENSG00000005206.17	SPPL2B	chr19	+	2337114	2337333	2334601	2334721	2337442	2337482	21580	4,3	3,9	0,0	8,2	319	100	0.00061407129013	0.0145325576943	0.295,0.095	0.0,0.0	0.195
46638	ENSG00000163517.15	HDAC11	chr3	+	13500712	13500789	13483463	13483564	13501870	13501933	46638	27,39	2,5	23,37	12,14	177	100	0.000614461373471	0.0145335736725	0.884,0.815	0.52,0.599	0.29
35036	ENSG00000187109.15	NAP1L1	chr12	-	76067370	76067473	76056032	76056161	76084566	76084735	35036	22,27	0,0	23,18	6,0	203	100	0.000616647532063	0.0145770462619	1.0,1.0	0.654,1.0	0.173
29613	ENSG00000115392.13	FANCL	chr2	-	58194228	58194273	58165723	58165874	58198593	58198662	29613	7,1	14,12	0,1	17,20	145	100	0.000618227889391	0.0145996582613	0.256,0.054	0.0,0.033	0.139
49531	ENSG00000017260.20	ATP2C1	chr3	+	130980581	130980679	130975331	130975488	130992950	130993001	49531	147,149	4,6	129,220	0,0	198	100	0.00061830154299	0.0145996582613	0.949,0.926	1.0,1.0	-0.063
11117	ENSG00000136436.15	CALCOCO2	chr17	+	48860313	48860449	48856091	48856187	48862275	48862304	11117	996,900	4,3	823,822	16,8	236	100	0.000620446382122	0.0146268827949	0.991,0.992	0.956,0.978	0.025
23299	ENSG00000162613.17	FUBP1	chr1	-	77969021	77969084	77968164	77968203	77969924	77970015	23299	19,18	408,464	2,8	278,513	163	100	0.000620852041718	0.0146268827949	0.028,0.023	0.004,0.009	0.019
29966	ENSG00000132964.13	CDK8	chr13	+	26337566	26337642	26254103	26254769	26349071	26349182	29966	17,22	0,0	35,30	0,8	176	100	0.000619808539676	0.0146268827949	1.0,1.0	1.0,0.681	0.159
31928	ENSG00000132780.17	NASP	chr1	+	45616625	45616703	45616336	45616393	45617462	45617591	31928	2274,2658	38,28	2034,2808	17,12	178	100	0.000620631534022	0.0146268827949	0.971,0.982	0.985,0.992	-0.012
4490	ENSG00000204604.13	ZNF468	chr19	-	52845178	52845296	52838535	52842151	52849086	52849213	4490	19,22	3,9	5,8	12,9	218	100	0.000623008612102	0.014669435065	0.744,0.529	0.16,0.29	0.412
50599	ENSG00000073792.16	IGF2BP2	chr3	-	185672540	185672669	185658340	185658409	185675295	185675431	50599	940,878	158,137	409,356	94,112	229	100	0.000624119066807	0.0146873213782	0.722,0.737	0.655,0.581	0.112
40427	ENSG00000196678.14	ERI2	chr16	-	20805714	20805945	20803602	20803670	20806407	20806446	40427	104,88	8,11	53,55	1,1	331	100	0.000625797471826	0.0147185455944	0.797,0.707	0.941,0.943	-0.19
4201	ENSG00000125826.22	RBCK1	chr20	+	427926	428058	427312	427492	428490	428589	4201	21,14	330,234	10,0	343,213	232	100	0.000626409115216	0.0147246589604	0.027,0.025	0.012,0.0	0.02
20576	ENSG00000166169.17	POLL	chr10	-	101584601	101584720	101583507	101583681	101584877	101584919	20576	29,33	9,0	9,12	0,0	219	100	0.000627355210577	0.0147386228343	0.595,1.0	1.0,1.0	-0.203
51134	ENSG00000180822.12	PSMG4	chr6	+	3264173	3264325	3263683	3263759	3267590	3267920	51134	4,18	33,42	16,12	8,14	252	100	0.000628133609525	0.0147486335181	0.046,0.145	0.442,0.254	-0.252
59177	ENSG00000137776.17	SLTM	chr15	-	58899468	58899937	58898802	58898852	58901259	58901287	59177	593,366	1,2	507,508	10,6	569	100	0.00062948178511	0.0147720038866	0.99,0.97	0.899,0.937	0.062
31434	ENSG00000151923.18	TIAL1	chr10	-	119576846	119576905	119576610	119576750	119577079	119577214	31434	65,52	201,141	40,61	333,230	159	100	0.00063017211711	0.01477991915	0.169,0.188	0.07,0.143	0.072
8706	ENSG00000085511.20	MAP3K4	chr6	+	161070607	161070850	161048615	161049979	161073465	161073536	8706	145,161	0,0	180,46	0,8	343	100	0.000631617656263	0.0148026306686	1.0,1.0	1.0,0.626	0.187
59176	ENSG00000137776.17	SLTM	chr15	-	58899468	58899883	58898802	58898852	58901259	58901287	59176	536,323	1,2	466,442	10,6	515	100	0.0006318476294	0.0148026306686	0.99,0.969	0.9,0.935	0.062
476	ENSG00000133138.20	TBC1D8B	chrX	+	106839307	106839457	106827169	106827337	106840047	106840198	476	36,51	2,4	74,60	0,0	250	100	0.000632631189431	0.0148117563283	0.878,0.836	1.0,1.0	-0.143
36808	ENSG00000058056.10	USP13	chr3	+	179690240	179690301	179653123	179653393	179706933	179707076	36808	10,5	0,0	2,6	0,13	161	100	0.000632944752688	0.0148117563283	1.0,1.0	1.0,0.223	0.388
26564	ENSG00000246090.9	ENSG00000246090	chr4	+	99102362	99102665	99088950	99089284	99102767	99102793	26564	3,4	0,1	5,1	9,2	403	100	0.000634551475532	0.0148410600688	1.0,0.498	0.121,0.11	0.633
62828	ENSG00000110721.12	CHKA	chr11	-	68081403	68081457	68074716	68074830	68097018	68097130	62828	173,177	10,2	165,209	0,0	154	100	0.000635444894982	0.0148536574698	0.918,0.983	1.0,1.0	-0.049
27823	ENSG00000117602.13	RCAN3	chr1	+	24533082	24533254	24531217	24531391	24535092	24535357	27823	102,82	0,0	142,137	10,0	272	100	0.000636529025734	0.0148706962402	1.0,1.0	0.839,1.0	0.081
33057	ENSG00000135164.19	DMTF1	chr7	+	87155454	87155497	87154389	87154528	87163494	87163617	33057	2,3	5,4	0,0	7,4	143	100	0.000638530682071	0.0149091394339	0.219,0.344	0.0,0.0	0.281
70027	ENSG00000015133.20	CCDC88C	chr14	-	91285394	91285836	91283328	91283517	91289104	91289331	70027	22,13	37,45	2,0	15,8	542	100	0.0006389113733	0.0149097127331	0.099,0.051	0.024,0.0	0.063
33845	ENSG00000031823.14	RANBP3	chr19	-	5957917	5957973	5941798	5941835	5978060	5978085	33845	409,352	4,3	252,93	13,2	156	100	0.000639303835376	0.0149105599265	0.985,0.987	0.926,0.968	0.039
56759	ENSG00000119689.15	DLST	chr14	+	74889877	74889952	74889274	74889349	74891055	74891193	56759	70,64	7,1	72,59	0,0	175	100	0.000640661621381	0.0149339080062	0.851,0.973	1.0,1.0	-0.088
41833	ENSG00000006704.11	GTF2IRD1	chr7	+	74544754	74544802	74539878	74539968	74545743	74545809	41833	84,57	0,1	67,36	9,0	148	100	0.000642700837407	0.0149731054858	1.0,0.975	0.834,1.0	0.071
60552	ENSG00000175224.17	ATG13	chr11	+	46621041	46621157	46617556	46617890	46630044	46630100	60552	0,0	13,12	4,3	7,14	216	100	0.000643374033245	0.0149804526706	0.0,0.0	0.209,0.09	-0.149
66335	ENSG00000035681.9	NSMAF	chr8	-	58605926	58606035	58603209	58603386	58607768	58607840	66335	36,39	2,5	11,5	0,0	209	100	0.000644640183525	0.0150015904854	0.896,0.789	1.0,1.0	-0.157
45286	ENSG00000170873.19	MTSS1	chr8	-	124580550	124580562	124568378	124568536	124585086	124585161	45286	4,6	37,39	1,0	36,39	112	100	0.000645680240612	0.0150174462629	0.088,0.121	0.024,0.0	0.092
36125	ENSG00000130731.16	METTL26	chr16	-	634888	634956	634718	634797	635280	635340	36125	143,117	35,31	65,33	34,22	168	100	0.000646631909024	0.0150312298008	0.709,0.692	0.532,0.472	0.198
19048	ENSG00000183955.14	KMT5A	chr12	+	123389432	123389554	123384131	123384208	123390629	123390786	19048	14,30	2,4	6,1	0,0	222	100	0.000648331371062	0.0150540171101	0.759,0.772	1.0,1.0	-0.234
26153	ENSG00000183747.12	ACSM2A	chr16	+	20452338	20452466	20451610	20451681	20460106	20460291	26153	8,7	21,33	0,0	6,4	228	100	0.000648238308221	0.0150540171101	0.143,0.085	0.0,0.0	0.114
10572	ENSG00000176014.13	TUBB6	chr18	+	12310942	12311053	12308240	12308795	12325066	12325100	10572	34,16	0,0	88,30	2,6	211	100	0.000654053356135	0.0151459473111	1.0,1.0	0.954,0.703	0.171
22195	ENSG00000196233.14	LCOR	chr10	+	96954952	96955454	96952102	96952196	96958411	96958926	22195	87,91	0,0	55,50	4,1	602	100	0.000653076439413	0.0151459473111	1.0,1.0	0.695,0.893	0.206
25388	ENSG00000122512.17	PMS2	chr7	-	6003742	6003792	6002452	6002636	6003971	6004058	25388	10,12	3,2	8,9	0,0	150	100	0.000654149215406	0.0151459473111	0.69,0.8	1.0,1.0	-0.255
64261	ENSG00000121350.16	PYROXD1	chr12	+	21452080	21452154	21449562	21449691	21455131	21455292	64261	38,28	4,4	78,63	0,2	174	100	0.000654461213085	0.0151459473111	0.845,0.801	1.0,0.948	-0.151
76539	ENSG00000178026.13	LRRC75B	chr22	-	24592216	24592423	24589820	24589949	24592862	24593064	76539	32,41	2,4	18,13	0,0	307	100	0.00065364532626	0.0151459473111	0.839,0.77	1.0,1.0	-0.196
79235	ENSG00000105700.11	KXD1	chr19	+	18560099	18560550	18557897	18557914	18562035	18562157	79235	22,24	86,82	21,26	37,7	551	100	0.000654252276806	0.0151459473111	0.044,0.05	0.093,0.403	-0.201
27754	ENSG00000138459.9	SLC35A5	chr3	+	112580545	112580706	112573888	112573956	112581178	112581326	27754	20,22	0,0	17,19	0,6	261	100	0.000655356925198	0.0151582970571	1.0,1.0	1.0,0.548	0.226
24982	ENSG00000143537.14	ADAM15	chr1	+	155061417	155061489	155060762	155060832	155061903	155061975	24982	7,4	8,4	2,4	0,1	172	100	0.000657705860057	0.0152042274055	0.337,0.368	1.0,0.699	-0.497
53126	ENSG00000121057.13	AKAP1	chr17	+	57120249	57120293	57118981	57119044	57121278	57121342	53126	130,99	8,4	141,138	2,0	144	100	0.000659215420827	0.0152307139034	0.919,0.945	0.98,1.0	-0.058
73064	ENSG00000140987.21	ZSCAN32	chr16	-	3390009	3390183	3384083	3384941	3393648	3393814	73064	6,13	0,6	6,6	0,0	274	100	0.000662961588886	0.0153088179364	1.0,0.442	1.0,1.0	-0.279
63470	ENSG00000143033.18	MTF2	chr1	+	93127231	93127299	93120548	93120672	93133702	93133808	63470	118,111	0,0	77,117	8,1	168	100	0.000664113795197	0.0153185256396	1.0,1.0	0.851,0.986	0.082
67300	ENSG00000088305.19	DNMT3B	chr20	+	32792625	32792770	32791485	32791708	32795408	32795534	67300	86,83	6,4	22,15	0,0	245	100	0.000664000919222	0.0153185256396	0.854,0.894	1.0,1.0	-0.126
47791	ENSG00000173402.13	DAG1	chr3	+	49487227	49487415	49476848	49476900	49488625	49488639	47791	2,17	2,2	7,2	0,0	288	100	0.000664858222363	0.0153272519159	0.258,0.747	1.0,1.0	-0.498
25756	ENSG00000196911.12	KPNA5	chr6	+	116681492	116681552	116681210	116681338	116689319	116689453	25756	7,4	6,7	2,0	15,4	160	100	0.000670733623555	0.015454189956	0.422,0.263	0.077,0.0	0.304
37791	ENSG00000231584.10	FAHD2CP	chr2	+	96019480	96019700	96019200	96019260	96021124	96021233	37791	18,13	6,10	25,4	2,0	320	100	0.000671790239457	0.0154700211083	0.484,0.289	0.796,1.0	-0.512
17670	ENSG00000163697.17	APBB2	chr4	-	41142986	41143142	41100638	41100750	41214404	41214458	17670	40,39	7,0	25,19	0,0	256	100	0.000672891428042	0.0154868607119	0.691,1.0	1.0,1.0	-0.155
47233	ENSG00000204842.18	ATXN2	chr12	-	111482786	111482831	111470557	111470742	111485270	111485331	47233	11,5	76,105	0,0	17,49	145	100	0.000674133073156	0.0155055175607	0.091,0.032	0.0,0.0	0.061
54390	ENSG00000084112.15	SSH1	chr12	-	108823257	108823361	108817037	108817159	108852637	108852678	54390	25,18	6,0	6,10	0,0	204	100	0.000674442791783	0.0155055175607	0.671,1.0	1.0,1.0	-0.164
34395	ENSG00000176623.12	RMDN1	chr8	-	86505299	86505379	86494828	86494966	86506994	86507112	34395	2,2	0,2	0,0	1,1	180	100	0.000675995594935	0.0155241665288	1.0,0.357	0.0,0.0	0.678
76518	ENSG00000170113.16	NIPA1	chr15	+	22814082	22814153	22812162	22812253	22820312	22820473	76518	3,2	5,2	0,0	7,3	171	100	0.000675801079171	0.0155241665288	0.26,0.369	0.0,0.0	0.315
36146	ENSG00000164002.12	EXO5	chr1	+	40509450	40509625	40508766	40508908	40509732	40509790	36146	66,64	8,7	75,63	0,3	275	100	0.000680566725548	0.0156034643839	0.75,0.769	1.0,0.884	-0.182
41899	ENSG00000166444.19	DENND2B	chr11	-	8699856	8700012	8699212	8699390	8702571	8702657	41899	6,2	29,45	9,2	11,3	256	100	0.000680061101259	0.0156034643839	0.075,0.017	0.242,0.207	-0.178
54389	ENSG00000084112.15	SSH1	chr12	-	108818248	108818313	108817037	108817159	108852637	108852678	54389	15,10	6,0	4,7	0,0	165	100	0.000680204592443	0.0156034643839	0.602,1.0	1.0,1.0	-0.199
29625	ENSG00000115392.13	FANCL	chr2	-	58226727	58226775	58221941	58222042	58229813	58229874	29625	8,15	0,0	12,18	0,6	148	100	0.00068219272194	0.0156321829798	1.0,1.0	1.0,0.67	0.165
57783	ENSG00000087095.13	NLK	chr17	+	28185178	28185265	28172516	28172618	28191020	28191172	57783	23,55	1,6	12,11	0,0	187	100	0.000683276980457	0.0156484632313	0.925,0.831	1.0,1.0	-0.122
35790	ENSG00000119782.14	FKBP1B	chr2	+	24054103	24054192	24053901	24053949	24060813	24060926	35790	31,28	52,52	56,52	42,44	189	100	0.000684875015139	0.0156593623751	0.24,0.222	0.414,0.385	-0.168
40322	ENSG00000140368.14	PSTPIP1	chr15	+	77032297	77032428	77031179	77031278	77035507	77035563	40322	7,3	0,0	0,2	4,0	231	100	0.000684808943281	0.0156593623751	1.0,1.0	0.0,1.0	0.5
70041	ENSG00000066427.25	ATXN3	chr14	-	92047895	92047987	92044774	92044958	92049602	92049786	70041	1,0	1,2	4,2	0,2	192	100	0.000684308346323	0.0156593623751	0.342,0.0	1.0,0.342	-0.5
27432	ENSG00000163597.17	SNHG16	chr17	+	76558944	76559010	76557766	76557857	76561287	76561398	27432	89,69	144,88	21,30	139,56	166	100	0.000686953149054	0.0156983043587	0.271,0.321	0.083,0.244	0.133
59737	ENSG00000161813.23	LARP4	chr12	+	50416345	50416434	50400895	50401028	50427761	50427909	59737	0,0	27,14	7,0	17,7	189	100	0.000687430619026	0.0157006453167	0.0,0.0	0.179,0.0	-0.089
76056	ENSG00000163625.16	WDFY3	chr4	-	84896910	84897010	84860411	84860622	84932269	84932363	76056	22,16	0,0	5,8	0,7	200	100	0.000688718658221	0.0157214867102	1.0,1.0	1.0,0.364	0.318
72245	ENSG00000103811.18	CTSH	chr15	-	78931868	78932041	78931450	78931506	78932371	78932458	72245	1,3	197,129	15,1	104,49	273	100	0.000690149539988	0.0157455643006	0.002,0.008	0.05,0.007	-0.024
54660	ENSG00000074582.15	BCS1L	chr2	+	218660036	218660218	218659708	218659743	218660938	218661307	54660	42,40	3,3	27,59	0,0	282	100	0.000691355761392	0.0157644928925	0.832,0.825	1.0,1.0	-0.171
15193	ENSG00000113552.16	GNPDA1	chr5	-	142012287	142012339	142011911	142012041	142012668	142012996	15193	11,10	2,3	2,4	0,0	152	100	0.000693415661114	0.0158028560983	0.783,0.687	1.0,1.0	-0.265
22930	ENSG00000059588.10	TARBP1	chr1	-	234427316	234427388	234425672	234425793	234427575	234427766	22930	136,85	9,6	146,210	2,3	172	100	0.000694327768023	0.0158122447018	0.898,0.892	0.977,0.976	-0.081
66105	ENSG00000108443.14	RPS6KB1	chr17	+	59940835	59940943	59936214	59936541	59945405	59945518	66105	124,115	1,0	41,50	7,0	208	100	0.000694583016998	0.0158122447018	0.984,1.0	0.738,1.0	0.123
56335	ENSG00000165795.25	NDRG2	chr14	-	21022863	21022905	21022391	21022497	21023240	21023321	56335	165,134	401,326	434,329	647,546	142	100	0.000696214163281	0.015840764101	0.225,0.224	0.321,0.298	-0.085
7198	ENSG00000134644.16	PUM1	chr1	-	30980061	30980178	30974650	30974802	30981311	30981405	7198	185,192	7,2	28,14	5,3	217	100	0.000698695509335	0.0158885863652	0.924,0.978	0.721,0.683	0.249
9188	ENSG00000263001.8	GTF2I	chr7	+	74744138	74744250	74743448	74743520	74744757	74744941	9188	11,2	2,2	14,13	0,0	212	100	0.000699287730586	0.015893420652	0.722,0.321	1.0,1.0	-0.479
24366	ENSG00000164548.12	TRA2A	chr7	-	23522131	23522432	23521706	23521840	23531788	23532041	24366	682,979	22,20	729,1605	6,18	401	100	0.000699750781193	0.0158953154936	0.885,0.924	0.968,0.957	-0.058
54576	ENSG00000172775.17	PSME3IP1	chr16	-	57175538	57175700	57174619	57174688	57185820	57186039	54576	20,12	2,6	11,18	1,0	262	100	0.00070075615161	0.0159095207631	0.792,0.433	0.808,1.0	-0.291
49337	ENSG00000137210.14	TMEM14B	chr6	+	10749621	10749698	10747772	10747881	10756466	10756947	49337	1,3	1,2	4,1	0,0	177	100	0.000701733979469	0.0159230856642	0.361,0.459	1.0,1.0	-0.59
11493	ENSG00000141552.18	ANAPC11	chr17	+	81893551	81893614	81891712	81891841	81894466	81894586	11493	103,74	45,20	154,56	23,7	163	100	0.000702309478431	0.0159275115463	0.584,0.694	0.804,0.831	-0.178
52589	ENSG00000104529.19	EEF1D	chr8	-	143590644	143590735	143589893	143590081	143597347	143597411	52589	17,5	55,52	0,0	9,4	191	100	0.000703402528182	0.0159436636937	0.139,0.048	0.0,0.0	0.093
78694	ENSG00000143553.11	SNAPIN	chr1	+	153659137	153659184	153658702	153658886	153659447	153659566	78694	39,40	2,10	33,13	0,1	147	100	0.000705651560588	0.0159859862468	0.93,0.731	1.0,0.898	-0.119
63027	ENSG00000110274.16	CEP164	chr11	+	117408525	117408755	117407924	117408032	117408889	117409028	63027	20,11	31,35	4,0	27,9	330	100	0.000709332071259	0.0160606745069	0.164,0.087	0.043,0.0	0.104
41324	ENSG00000106384.12	MOGAT3	chr7	-	101198625	101198830	101195006	101196100	101200233	101200304	41324	38,42	2,4	11,6	0,0	305	100	0.000710412489049	0.0160671436789	0.862,0.775	1.0,1.0	-0.181
54034	ENSG00000119139.21	TJP2	chr9	+	69185086	69185204	69151650	69151771	69212547	69212601	54034	6,4	63,91	19,19	101,88	218	100	0.000710769141128	0.0160671436789	0.042,0.02	0.079,0.09	-0.053
66994	ENSG00000118900.15	UBN1	chr16	+	4877384	4877474	4876870	4877111	4880082	4880445	66994	19,12	2,3	5,4	0,0	190	100	0.000710005039692	0.0160671436789	0.833,0.678	1.0,1.0	-0.244
331	ENSG00000076770.16	MBNL3	chrX	-	132439434	132440314	132406227	132406392	132489813	132489930	331	142,114	2,0	130,97	12,2	980	100	0.000711196853141	0.0160681361342	0.879,1.0	0.525,0.832	0.261
34596	ENSG00000175287.19	PHYHD1	chr9	+	128937756	128937778	128936582	128936645	128941444	128941571	34596	4,1	0,5	0,0	3,2	122	100	0.000711896407089	0.0160752659562	1.0,0.141	0.0,0.0	0.571
8492	ENSG00000108021.22	TASOR2	chr10	+	5712393	5712539	5709529	5709663	5712822	5712918	8492	28,26	1,9	16,31	0,1	246	100	0.000714015876311	0.0161057514341	0.919,0.54	1.0,0.926	-0.234
9665	ENSG00000146282.19	RARS2	chr6	-	87545615	87545699	87530783	87530942	87555407	87555505	9665	24,41	1,3	39,24	10,9	184	100	0.000713669151666	0.0161057514341	0.929,0.881	0.679,0.592	0.27
31396	ENSG00000112715.26	VEGFA	chr6	+	43780731	43780803	43778888	43778918	43784540	43784562	31396	54,36	166,162	38,97	94,113	172	100	0.00071472520577	0.0161130698651	0.159,0.114	0.19,0.333	-0.125
70480	ENSG00000126215.14	XRCC3	chr14	-	103712874	103712931	103711465	103711567	103715423	103715451	70480	19,20	7,6	20,15	2,0	157	100	0.00071768989293	0.0161711987984	0.634,0.68	0.864,1.0	-0.275
72395	ENSG00000166716.10	ZNF592	chr15	+	84764706	84764815	84748591	84748664	84782656	84784895	72395	64,34	2,10	21,35	0,1	209	100	0.000718677289386	0.0161847362669	0.939,0.619	1.0,0.944	-0.193
41424	ENSG00000196696.13	PDXDC2P-NPIPB14P	chr16	-	69976810	69978003	69976296	69976732	69978076	69978112	41424	244,182	21,18	393,293	7,13	1293	100	0.000719474988526	0.0161939894595	0.473,0.439	0.813,0.635	-0.268
59541	ENSG00000148985.20	PGAP2	chr11	+	3811249	3811424	3808289	3808315	3823882	3824135	59541	104,86	0,1	33,15	6,0	275	100	0.000721235629868	0.0162248950266	1.0,0.969	0.667,1.0	0.151
47165	ENSG00000172939.9	OXSR1	chr3	+	38193281	38193418	38190730	38190839	38198721	38198863	47165	12,6	72,47	2,4	73,102	237	100	0.000721813922089	0.016229183592	0.066,0.051	0.011,0.016	0.045
72122	ENSG00000140497.16	SCAMP2	chr15	-	74848599	74848645	74845472	74845593	74850513	74850673	72122	82,80	6,6	30,12	0,0	146	100	0.000723170359223	0.0162509538856	0.903,0.901	1.0,1.0	-0.098
32657	ENSG00000151687.15	ANKAR	chr2	+	189728659	189728821	189728266	189728420	189737682	189737841	32657	3,6	1,2	6,2	0,0	262	100	0.000724246064447	0.0162576737201	0.534,0.534	1.0,1.0	-0.466
42395	ENSG00000197111.16	PCBP2	chr12	+	53464759	53464852	53462480	53462567	53465931	53465973	42395	1703,1305	282,195	1004,819	80,102	193	100	0.000723980032335	0.0162576737201	0.758,0.776	0.867,0.806	-0.07
2617	ENSG00000185808.14	PIGP	chr21	-	37072144	37072310	37069551	37069624	37072433	37072537	2617	43,69	11,10	20,30	18,15	266	100	0.000725224936977	0.0162622078128	0.595,0.722	0.295,0.429	0.296
15508	ENSG00000015676.18	NUDCD3	chr7	-	44413190	44413283	44404439	44404583	44425899	44426279	15508	4,1	2,3	0,0	2,2	193	100	0.000725143320631	0.0162622078128	0.509,0.147	0.0,0.0	0.328
56644	ENSG00000062598.18	ELMO2	chr20	-	46398696	46398771	46394404	46394503	46406547	46406559	56644	31,29	3,6	28,13	1,0	175	100	0.000731856950001	0.0164002023294	0.855,0.734	0.941,1.0	-0.176
61483	ENSG00000100532.13	CGRRF1	chr14	+	54523149	54523245	54522453	54522593	54530048	54530226	61483	4,5	12,10	0,1	8,13	196	100	0.000732162382745	0.0164002023294	0.145,0.203	0.0,0.038	0.155
55715	ENSG00000054179.12	ENTPD2	chr9	-	137048940	137049006	137048596	137048860	137049869	137049989	55715	34,21	2,4	28,12	0,0	166	100	0.000735544866021	0.01645835693	0.911,0.76	1.0,1.0	-0.164
73256	ENSG00000140650.13	PMM2	chr16	+	8850932	8851050	8849848	8849993	8855033	8855217	73256	5,9	2,2	1,6	0,0	218	100	0.000735333709283	0.01645835693	0.534,0.674	1.0,1.0	-0.396
28907	ENSG00000221978.13	CCNL2	chr1	-	1391296	1391575	1390765	1390865	1392678	1392716	28907	272,257	17,8	197,73	3,0	379	100	0.00073833984634	0.0165020983252	0.808,0.894	0.945,1.0	-0.121
59576	ENSG00000105699.17	LSR	chr19	+	35262545	35262692	35250314	35250659	35266358	35266532	59576	815,928	63,82	305,405	11,18	247	100	0.000738657160018	0.0165020983252	0.84,0.821	0.918,0.901	-0.079
70740	ENSG00000134759.14	ELP2	chr18	+	36139418	36139613	36138794	36138872	36141136	36141201	70740	7,5	37,38	0,0	48,33	295	100	0.000738682246781	0.0165020983252	0.06,0.043	0.0,0.0	0.051
1416	ENSG00000054611.14	TBC1D22A	chr22	+	46797443	46797620	46793500	46793841	46878652	46878723	1416	114,131	7,3	40,43	0,0	277	100	0.000739473356131	0.0165109610957	0.855,0.94	1.0,1.0	-0.103
13983	ENSG00000173262.12	SLC2A14	chr12	-	7869862	7869937	7832721	7832814	7890995	7891148	13983	34,25	1,5	32,15	0,0	175	100	0.000740849205959	0.0165240554115	0.951,0.741	1.0,1.0	-0.154
75075	ENSG00000197912.16	SPG7	chr16	+	89540943	89541346	89532462	89532636	89544647	89544772	75075	144,120	64,65	132,135	34,33	503	100	0.000740762817942	0.0165240554115	0.309,0.268	0.436,0.449	-0.154
41836	ENSG00000006704.11	GTF2IRD1	chr7	+	74555392	74555494	74555173	74555223	74557638	74557722	41836	102,71	7,2	54,42	0,0	202	100	0.000742110037597	0.0165345591932	0.878,0.946	1.0,1.0	-0.088
46776	ENSG00000021461.18	CYP3A43	chr7	+	99849545	99849694	99847487	99848254	99855590	99855718	46776	31,21	0,7	8,9	0,0	249	100	0.00074173852465	0.0165345591932	1.0,0.546	1.0,1.0	-0.227
73908	ENSG00000102893.18	PHKB	chr16	+	47664884	47664975	47663676	47663734	47669214	47669417	73908	2,10	0,0	0,4	2,1	191	100	0.00074974842404	0.0166958605173	1.0,1.0	0.0,0.677	0.661
17590	ENSG00000109390.13	NDUFC1	chr4	-	139297384	139297443	139295731	139295960	139300601	139301210	17590	2,7	37,23	0,0	24,22	159	100	0.000751209534056	0.0167017456948	0.033,0.161	0.0,0.0	0.097
38143	ENSG00000196295.13	GARS1-DT	chr7	-	30576563	30576710	30568832	30568989	30577648	30577759	38143	1,3	2,1	3,3	0,0	247	100	0.000750752014064	0.0167017456948	0.168,0.548	1.0,1.0	-0.642
64828	ENSG00000050426.16	LETMD1	chr12	+	51052091	51052246	51049033	51049185	51053777	51053860	64828	54,68	16,12	34,29	1,2	255	100	0.000751013413741	0.0167017456948	0.57,0.69	0.93,0.85	-0.26
44452	ENSG00000064012.24	CASP8	chr2	+	201272897	201272942	201272637	201272776	201276826	201276968	44452	63,71	42,44	45,40	14,3	145	100	0.000752032828577	0.0167111753548	0.508,0.527	0.689,0.902	-0.278
70481	ENSG00000126215.14	XRCC3	chr14	-	103712874	103712941	103711465	103711567	103715423	103715504	70481	19,19	7,6	19,15	2,0	167	100	0.000754594283338	0.016759198765	0.619,0.655	0.85,1.0	-0.288
37787	ENSG00000231584.10	FAHD2CP	chr2	+	96019459	96019700	96019200	96019260	96021124	96021233	37787	18,13	6,10	25,4	2,0	341	100	0.000755261601389	0.0167651256321	0.468,0.276	0.786,1.0	-0.521
8736	ENSG00000118007.13	STAG1	chr3	-	136630869	136630981	136604308	136604473	136752194	136752366	8736	10,17	0,0	15,16	0,6	212	100	0.000759514971812	0.0167954053733	1.0,1.0	1.0,0.557	0.222
14762	ENSG00000170175.11	CHRNB1	chr17	+	7448578	7448788	7447042	7447650	7454296	7454520	14762	255,312	22,30	81,111	4,1	310	100	0.000760129309008	0.0167954053733	0.789,0.77	0.867,0.973	-0.14
18614	ENSG00000163320.12	CGGBP1	chr3	-	88057190	88057292	88051949	88055999	88058018	88058223	18614	32,16	112,125	33,61	86,136	202	100	0.000758523351531	0.0167954053733	0.124,0.06	0.16,0.182	-0.079
22653	ENSG00000152894.15	PTPRK	chr6	-	128491731	128491849	128397565	128397688	128520258	128520565	22653	15,21	134,100	3,3	91,43	218	100	0.00076019669212	0.0167954053733	0.049,0.088	0.015,0.031	0.046
29267	ENSG00000251247.12	ZNF345	chr19	+	36862916	36863011	36851829	36851904	36876784	36877113	29267	2,4	3,8	0,0	8,3	195	100	0.000760220108114	0.0167954053733	0.255,0.204	0.0,0.0	0.229
34052	ENSG00000143740.15	SNAP47	chr1	+	227732388	227733518	227728685	227728786	227747691	227748233	34052	84,60	0,0	25,12	0,7	1230	100	0.000758555003463	0.0167954053733	1.0,1.0	1.0,0.122	0.439
55648	ENSG00000158545.16	ZC3H18	chr16	+	88611267	88611536	88599790	88599948	88622196	88622388	55648	295,165	6,2	218,108	13,8	369	100	0.000758592942619	0.0167954053733	0.93,0.957	0.82,0.785	0.141
78082	ENSG00000151445.16	VIPAS39	chr14	-	77457094	77457365	77454009	77454102	77457494	77457561	78082	21,10	45,26	3,1	35,4	371	100	0.000760236311534	0.0167954053733	0.112,0.094	0.023,0.063	0.06
78697	ENSG00000142002.19	DPP9	chr19	-	4695377	4695555	4694316	4694823	4697550	4697651	78697	306,328	1,3	126,138	10,1	278	100	0.000757882890385	0.0167954053733	0.991,0.975	0.819,0.98	0.084
18373	ENSG00000269713.9	NBPF9	chr1	-	149100740	149100930	149098437	149098706	149101261	149101360	18373	101,50	4,5	9,14	0,0	290	100	0.000762181182933	0.0168294911516	0.897,0.775	1.0,1.0	-0.164
55716	ENSG00000054179.12	ENTPD2	chr9	-	137048940	137049075	137048106	137048860	137049869	137049989	55716	56,27	2,4	42,18	0,0	235	100	0.000762833075433	0.0168350061692	0.923,0.742	1.0,1.0	-0.167
17817	ENSG00000049167.16	ERCC8	chr5	-	60909647	60909957	60904791	60904873	60918264	60918388	17817	5,9	30,17	0,0	10,10	410	100	0.000764550275665	0.0168640133249	0.039,0.114	0.0,0.0	0.076
62476	ENSG00000087053.20	MTMR2	chr11	-	95887611	95887684	95865439	95865676	95888155	95888261	62476	18,26	32,23	8,3	31,19	173	100	0.000768182254315	0.0169352027788	0.245,0.395	0.13,0.084	0.213
73361	ENSG00000153066.13	TXNDC11	chr16	-	11721576	11721670	11700451	11700564	11733981	11733999	73361	39,74	0,0	26,23	0,6	194	100	0.000768606705347	0.0169356419576	1.0,1.0	1.0,0.664	0.168
27307	ENSG00000119777.20	TMEM214	chr2	+	27037789	27037892	27037560	27037702	27038145	27038237	27307	9,2	91,80	22,10	91,67	203	100	0.000769473990207	0.0169458330353	0.046,0.012	0.106,0.068	-0.058
73574	ENSG00000166822.13	TMEM170A	chr16	-	75451737	75451839	75443053	75447688	75464467	75464689	73574	26,39	3,3	52,26	0,0	202	100	0.000770348473219	0.0169561718356	0.811,0.866	1.0,1.0	-0.161
33891	ENSG00000162599.18	NFIA	chr1	+	61399375	61399520	61383236	61383365	61404103	61404282	33891	5,1	101,137	2,8	15,40	245	100	0.000771264391344	0.0169674113209	0.02,0.003	0.052,0.075	-0.052
40327	ENSG00000277072.5	STAG3L2	chr7	-	74883727	74883835	74882162	74883463	74884143	74884223	40327	8,5	8,0	8,1	0,0	208	100	0.000772861871178	0.0169936251244	0.325,1.0	1.0,1.0	-0.338
36359	ENSG00000121940.17	CLCC1	chr1	-	108962308	108962469	108950308	108950438	108963360	108963413	36359	12,11	1,0	4,24	4,3	261	100	0.000773728372118	0.0170016203667	0.821,1.0	0.277,0.754	0.395
53516	ENSG00000108219.16	TSPAN14	chr10	+	80468546	80468687	80454309	80454371	80489216	80489314	53516	65,51	7,7	105,101	3,2	241	100	0.00077403770259	0.0170016203667	0.794,0.751	0.936,0.954	-0.173
49944	ENSG00000144895.12	EIF2A	chr3	+	150581617	150581746	150575648	150575762	150583199	150583265	49944	1460,1468	2,3	624,1214	17,5	229	100	0.000776873699484	0.0170549645668	0.997,0.995	0.941,0.991	0.03
8573	ENSG00000157985.20	AGAP1	chr2	+	235930764	235930923	235908737	235908906	235968461	235968623	8573	150,164	156,208	20,64	2,26	259	100	0.000777895854103	0.0170627096749	0.271,0.233	0.794,0.487	-0.389
68125	ENSG00000152767.17	FARP1	chr13	+	98437765	98437858	98435575	98435706	98438803	98438872	68125	15,20	355,279	9,9	500,392	193	100	0.000778073883706	0.0170627096749	0.021,0.036	0.009,0.012	0.018
68429	ENSG00000095637.23	SORBS1	chr10	-	95336520	95337294	95321962	95322021	95339132	95339327	68429	22,23	40,28	9,12	45,45	874	100	0.000778449193338	0.0170627096749	0.059,0.086	0.022,0.03	0.046
43261	ENSG00000136560.14	TANK	chr2	+	161161284	161161412	161160343	161160484	161179613	161179761	43261	61,77	35,99	138,162	45,64	228	100	0.000785590384706	0.0172102257748	0.433,0.254	0.574,0.526	-0.207
62177	ENSG00000074266.22	EED	chr11	+	86270082	86270157	86267894	86268561	86276979	86277138	62177	17,12	37,13	8,4	31,46	175	100	0.000787205973752	0.01723659942	0.208,0.345	0.129,0.047	0.188
73588	ENSG00000140750.17	ARHGAP17	chr16	-	24939363	24939597	24930783	24931404	24941986	24942143	73588	87,59	7,10	72,18	1,1	334	100	0.000791273856904	0.0173166126604	0.788,0.639	0.956,0.843	-0.186
77847	ENSG00000101558.14	VAPA	chr18	+	9944923	9945058	9936985	9937066	9950394	9950568	77847	79,89	327,217	67,84	433,395	235	100	0.000795701816618	0.0174044182616	0.093,0.149	0.062,0.083	0.048
24364	ENSG00000164548.12	TRA2A	chr7	-	23522120	23522432	23521706	23521840	23531788	23531980	24364	692,987	22,20	732,1604	6,18	412	100	0.000796571930067	0.0174143518811	0.884,0.923	0.967,0.956	-0.058
3235	ENSG00000101017.15	CD40	chr20	+	46121819	46121898	46118270	46118394	46122232	46122358	3235	83,47	5,4	34,17	0,0	179	100	0.000797656245183	0.0174289554826	0.903,0.868	1.0,1.0	-0.115
70004	ENSG00000140025.16	EFCAB11	chr14	-	89924512	89924677	89797126	89797324	89931540	89931631	70004	8,3	23,22	2,0	39,25	265	100	0.000799866035428	0.0174681228864	0.116,0.049	0.019,0.0	0.073
2544	ENSG00000205581.11	HMGN1	chr21	-	39347246	39347292	39345145	39345274	39347378	39347483	2544	4,8	31,68	2,0	28,86	146	100	0.000801200036703	0.0174804715053	0.081,0.075	0.047,0.0	0.054
5501	ENSG00000126261.13	UBA2	chr19	+	34430092	34430186	34428351	34428570	34430575	34430659	5501	12,10	170,136	18,33	131,155	194	100	0.000801684110596	0.0174804715053	0.035,0.037	0.066,0.099	-0.046
58016	ENSG00000123349.15	PFDN5	chr12	+	53297849	53297924	53295524	53295639	53298044	53298150	58016	417,322	12,4	373,385	0,1	175	100	0.000801323588389	0.0174804715053	0.952,0.979	1.0,0.995	-0.032
55185	ENSG00000175866.16	BAIAP2	chr17	+	81110913	81110959	81108474	81108509	81115769	81116224	55185	18,7	35,39	23,4	15,1	146	100	0.00080472968588	0.0175377450804	0.26,0.109	0.512,0.733	-0.438
68529	ENSG00000141551.15	CSNK1D	chr17	-	82245975	82246039	82244300	82244831	82248874	82249014	68529	310,213	42,32	229,167	16,9	164	100	0.000805903119107	0.0175541800632	0.818,0.802	0.897,0.919	-0.098
21391	ENSG00000154305.18	MIA3	chr1	+	222662887	222663031	222662252	222662332	222663997	222664050	21391	10,16	102,114	1,0	33,34	244	100	0.000807194372141	0.0175731629692	0.039,0.054	0.012,0.0	0.041
29666	ENSG00000143457.11	GOLPH3L	chr1	-	150663631	150663763	150661813	150661928	150694655	150694850	29666	192,136	2,8	151,98	0,0	232	100	0.000809323786081	0.0176103639835	0.976,0.88	1.0,1.0	-0.072
54661	ENSG00000074582.15	BCS1L	chr2	+	218660036	218660245	218659682	218659743	218660938	218661307	54661	52,45	3,3	38,64	0,0	309	100	0.000814905873368	0.0177226152668	0.849,0.829	1.0,1.0	-0.161
68183	ENSG00000125247.16	TMTC4	chr13	-	100670359	100670569	100668578	100668794	100674743	100674795	68183	40,13	4,1	34,19	0,0	310	100	0.000818876094034	0.0177997132278	0.763,0.807	1.0,1.0	-0.215
28470	ENSG00000078319.12	PMS2P1	chr7	-	100325690	100325868	100320438	100321084	100330181	100330284	28470	53,41	7,0	21,20	0,0	278	100	0.000819328069584	0.0178002956062	0.731,1.0	1.0,1.0	-0.135
24277	ENSG00000177106.17	EPS8L2	chr11	+	721902	721991	721564	721691	722090	722165	24277	541,331	2,2	453,208	10,6	189	100	0.000820868950418	0.0178104152172	0.993,0.989	0.96,0.948	0.037
63975	ENSG00000197444.10	OGDHL	chr10	-	49749725	49749816	49747028	49747208	49750838	49750985	63975	17,16	4,1	33,9	0,0	191	100	0.000820587565837	0.0178104152172	0.69,0.893	1.0,1.0	-0.209
73125	ENSG00000171307.19	ZDHHC16	chr10	+	97450356	97450536	97446174	97446353	97451670	97451918	73125	20,5	3,1	32,2	0,0	280	100	0.000821070138998	0.0178104152172	0.704,0.641	1.0,1.0	-0.328
44130	ENSG00000128641.19	MYO1B	chr2	+	191400748	191400835	191400381	191400468	191402631	191402718	44130	646,491	35,26	663,554	48,79	187	100	0.000821984995596	0.0178210263287	0.908,0.91	0.881,0.789	0.074
9424	ENSG00000198799.12	LRIG2	chr1	+	113119232	113119523	113116286	113116436	113123874	113124997	9424	206,157	0,0	77,148	0,7	391	100	0.000822811279931	0.0178297071606	1.0,1.0	1.0,0.844	0.078
14153	ENSG00000289189.2	ENSG00000289189	chr7	+	17020267	17020457	16990217	16990427	17021349	17021565	14153	9,13	2,6	23,21	0,2	290	100	0.000824621062884	0.0178596796677	0.608,0.428	1.0,0.784	-0.374
10098	ENSG00000141485.17	SLC13A5	chr17	-	6707027	6707148	6706641	6706778	6713231	6713371	10098	40,32	2,4	33,16	0,0	221	100	0.000826370929685	0.0178883241837	0.9,0.784	1.0,1.0	-0.158
60726	ENSG00000171877.21	FRMD5	chr15	-	43918977	43919280	43909881	43909979	43919458	43919537	60726	4,4	4,6	1,7	0,1	403	100	0.000826804996274	0.0178884708884	0.199,0.142	1.0,0.635	-0.647
10448	ENSG00000123473.17	STIL	chr1	-	47312947	47313021	47310275	47310362	47314035	47314147	10448	6,5	30,16	4,7	3,0	174	100	0.000829432769506	0.0179360552145	0.103,0.152	0.434,1.0	-0.589
62168	ENSG00000052841.15	TTC17	chr11	+	43436163	43436334	43414589	43414776	43443324	43443584	62168	311,293	11,6	196,169	0,2	271	100	0.000830211231945	0.0179436206636	0.913,0.947	1.0,0.969	-0.054
17348	ENSG00000132530.17	XAF1	chr17	+	6761885	6762037	6760405	6760601	6762154	6762193	17348	0,2	1,3	6,4	2,0	252	100	0.000831647677103	0.0179653921579	0.0,0.209	0.543,1.0	-0.667
14872	ENSG00000137274.13	BPHL	chr6	+	3119284	3119512	3118375	3118847	3123656	3123760	14872	43,55	11,10	32,16	2,0	328	100	0.000832427574203	0.0179729656493	0.544,0.626	0.83,1.0	-0.33
48457	ENSG00000135424.19	ITGA7	chr12	-	55686201	55686314	55684857	55685288	55687970	55688096	48457	6,2	4,1	6,3	1,0	213	100	0.000836729445424	0.0180565351715	0.413,0.484	0.738,1.0	-0.42
44169	ENSG00000154556.20	SORBS2	chr4	-	185651783	185651828	185649466	185649656	185652661	185652688	44169	292,333	57,91	26,100	18,45	145	100	0.000837945078249	0.0180734521901	0.779,0.716	0.499,0.605	0.196
4242	ENSG00000171606.18	ZNF274	chr19	+	58185696	58185838	58183920	58183998	58186946	58187042	4242	29,13	3,2	30,23	0,0	242	100	0.000839026533413	0.0180874592283	0.8,0.729	1.0,1.0	-0.236
19658	ENSG00000165490.13	DDIAS	chr11	+	82913956	82914170	82913286	82913386	82914722	82914851	19658	6,1	2,6	0,0	6,6	314	100	0.000840315410215	0.0181003355501	0.489,0.05	0.0,0.0	0.27
20409	ENSG00000248429.5	GASK1B-AS1	chr4	+	158172251	158172416	158170751	158171480	158179660	158179735	20409	5,3	2,11	0,1	6,12	265	100	0.000840488530024	0.0181003355501	0.485,0.093	0.0,0.03	0.274
78864	ENSG00000267106.9	ZNF561-AS1	chr19	+	9627715	9627806	9626783	9626860	9632227	9632417	78864	0,0	4,3	1,5	3,0	191	100	0.000845343273687	0.0181955250143	0.0,0.0	0.149,1.0	-0.575
4780	ENSG00000105483.18	CARD8	chr19	-	48238382	48238526	48233820	48234543	48240961	48241063	4780	36,43	11,9	13,14	13,11	244	100	0.000848010876806	0.0182341938148	0.573,0.662	0.291,0.343	0.3
57963	ENSG00000163832.16	ELP6	chr3	-	47510148	47510254	47504329	47504448	47511147	47511215	57963	14,22	3,2	8,13	0,0	206	100	0.000847871309653	0.0182341938148	0.694,0.842	1.0,1.0	-0.232
16474	ENSG00000145348.17	TBCK	chr4	-	106254946	106255047	106251865	106252007	106260436	106260510	16474	6,9	51,36	19,14	35,25	201	100	0.000849329915886	0.0182438157663	0.055,0.111	0.213,0.218	-0.133
52197	ENSG00000249859.14	PVT1	chr8	+	127994882	127995093	127989161	127989291	127996560	127996598	52197	6,5	25,13	0,0	11,9	311	100	0.000849252455188	0.0182438157663	0.072,0.11	0.0,0.0	0.091
68999	ENSG00000258704.8	SRP54-AS1	chr14	-	34934016	34934131	34927490	34928202	34954858	34954954	68999	9,7	6,9	4,3	0,1	215	100	0.000853204105496	0.0183176358341	0.411,0.266	1.0,0.583	-0.453
8431	ENSG00000122644.13	ARL4A	chr7	+	12687634	12687728	12686855	12687043	12688165	12689179	8431	15,8	3,7	6,7	0,1	194	100	0.000854088102872	0.0183178270629	0.72,0.371	1.0,0.783	-0.346
47123	ENSG00000167113.11	COQ4	chr9	+	128325142	128325239	128323015	128323147	128325778	128325881	47123	22,22	6,0	22,3	0,0	197	100	0.000853720260049	0.0183178270629	0.651,1.0	1.0,1.0	-0.174
72743	ENSG00000186575.19	NF2	chr22	+	29683019	29683079	29681438	29681601	29694751	29694811	72743	1,0	5,23	2,2	2,2	160	100	0.000855888567625	0.0183470429512	0.111,0.0	0.385,0.385	-0.33
36352	ENSG00000121940.17	CLCC1	chr1	-	108962308	108962464	108950308	108950438	108963360	108963450	36352	8,7	1,0	2,19	4,3	256	100	0.000858421191794	0.0183919156573	0.758,1.0	0.163,0.712	0.442
36681	ENSG00000055044.11	NOP58	chr2	+	202278211	202278329	202277949	202278002	202284344	202284378	36681	43,36	0,0	37,85	8,0	218	100	0.000860346327184	0.0184237334975	1.0,1.0	0.68,1.0	0.16
8479	ENSG00000184517.12	ZFP1	chr16	+	75166769	75166913	75152908	75152966	75169252	75169326	8479	66,66	6,4	30,47	0,1	244	100	0.000861361318273	0.0184360386449	0.818,0.871	1.0,0.951	-0.131
29500	ENSG00000251136.11	RIPK2-DT	chr8	-	89756234	89756610	89754532	89755375	89757044	89757383	29500	5,2	0,0	4,2	5,0	476	100	0.000863399945927	0.018470229298	1.0,1.0	0.144,1.0	0.428
42289	ENSG00000144233.12	AMMECR1L	chr2	-	127867144	127867279	127866899	127866996	127869453	127869540	42289	13,20	42,26	20,21	12,2	235	100	0.000864414670068	0.0184824924221	0.116,0.247	0.415,0.817	-0.434
31998	ENSG00000163608.15	NEPRO	chr3	-	113012733	113013403	113011044	113011406	113013952	113014032	31998	49,33	0,0	52,32	0,6	770	100	0.000865247060256	0.0184908464408	1.0,1.0	1.0,0.409	0.295
47261	ENSG00000010803.17	SCMH1	chr1	-	41151613	41151684	41142877	41143112	41159724	41159933	47261	62,63	42,51	6,15	11,31	171	100	0.000866264691822	0.0185031486342	0.463,0.419	0.242,0.221	0.21
17540	ENSG00000109171.15	SLAIN2	chr4	+	48394575	48394653	48383646	48383784	48420124	48420443	17540	27,38	89,87	4,2	12,48	178	100	0.000869217637083	0.018556754909	0.146,0.197	0.158,0.023	0.081
68253	ENSG00000100575.14	TIMM9	chr14	-	58424007	58424095	58410842	58410938	58427053	58427114	68253	65,42	2,5	46,46	0,0	188	100	0.00087203608401	0.0186074366244	0.945,0.817	1.0,1.0	-0.119
9389	ENSG00000056972.21	TRAF3IP2	chr6	-	111601195	111601318	111591257	111592094	111605775	111605844	9389	1,9	25,17	0,0	14,9	223	100	0.000874044988571	0.0186392462503	0.018,0.192	0.0,0.0	0.105
17799	ENSG00000206149.12	HERC2P9	chr15	+	28629265	28629441	28590157	28590260	28632636	28632807	17799	1,2	0,0	2,5	0,8	276	100	0.000874417284976	0.0186392462503	1.0,1.0	1.0,0.185	0.407
35311	ENSG00000184371.14	CSF1	chr1	+	109923165	109923711	109921846	109921994	109924059	109924190	35311	197,170	6,9	196,166	3,0	646	100	0.000876651713215	0.0186773658899	0.836,0.745	0.91,1.0	-0.165
34284	ENSG00000122133.17	PAEP	chr9	+	135562293	135562433	135561755	135561897	135562819	135562893	34284	11,4	0,0	11,4	1,3	240	100	0.000880706048458	0.0187542007725	1.0,1.0	0.821,0.357	0.411
38293	ENSG00000162402.14	USP24	chr1	-	55092820	55092916	55092022	55092126	55093936	55094087	38293	101,104	2,7	63,100	0,0	196	100	0.000886983732197	0.0188782785706	0.963,0.883	1.0,1.0	-0.077
1029	ENSG00000215301.11	DDX3X	chrX	+	41337690	41338912	41337407	41337465	41339035	41339083	1029	166,167	385,345	182,197	259,265	1322	100	0.000890856889551	0.0189420954976	0.032,0.035	0.05,0.053	-0.018
13103	ENSG00000145730.21	PAM	chr5	+	103028181	103028238	103019789	103019843	103028886	103029192	13103	105,77	15,6	117,89	4,2	157	100	0.000890887042511	0.0189420954976	0.817,0.891	0.949,0.966	-0.104
45418	ENSG00000124357.13	NAGK	chr2	+	71071685	71071827	71068315	71068712	71072640	71072690	45418	47,49	3,4	36,9	0,0	242	100	0.000892809903343	0.0189637172011	0.866,0.835	1.0,1.0	-0.149
59110	ENSG00000137497.19	NUMA1	chr11	-	72069841	72069911	72035901	72035975	72080457	72080494	59110	32,24	2,4	19,10	0,0	170	100	0.000892607638197	0.0189637172011	0.904,0.779	1.0,1.0	-0.158
14663	ENSG00000166278.16	C2	chr6	+	31934165	31934299	31933866	31933965	31935922	31935990	14663	1062,1027	14,11	679,460	0,0	234	100	0.000893888161032	0.0189769918162	0.97,0.976	1.0,1.0	-0.027
63134	ENSG00000175193.14	PARL	chr3	-	183856431	183856551	183844230	183844326	183862696	183862801	63134	3,2	5,12	2,2	0,1	220	100	0.000894550610869	0.0189814299666	0.214,0.07	1.0,0.476	-0.596
52856	ENSG00000120158.12	RCL1	chr9	+	4823547	4823619	4792943	4793227	4833153	4833228	52856	23,11	0,0	9,8	6,0	172	100	0.000896559501003	0.019011038649	1.0,1.0	0.466,1.0	0.267
74210	ENSG00000125107.19	CNOT1	chr16	-	58623281	58623409	58599262	58599511	58624652	58624794	74210	2,8	15,9	15,6	6,2	228	100	0.000896854205943	0.019011038649	0.055,0.281	0.523,0.568	-0.377
70760	ENSG00000276550.5	HERC2P2	chr15	+	22562642	22562731	22561558	22561789	22562948	22563087	70760	3,2	3,2	4,2	1,0	189	100	0.000898117238165	0.0190281772145	0.346,0.346	0.679,1.0	-0.494
21119	ENSG00000143774.17	GUK1	chr1	+	228141123	228141507	228140317	228140363	228145510	228145624	21119	50,34	19,31	42,10	6,1	484	100	0.000900316542841	0.0190554863832	0.352,0.185	0.591,0.674	-0.364
33225	ENSG00000084073.10	ZMPSTE24	chr1	+	40280119	40280312	40271893	40272035	40281342	40281527	33225	16,0	47,58	2,0	43,55	293	100	0.00090000590692	0.0190554863832	0.104,0.0	0.016,0.0	0.044
13404	ENSG00000070214.17	SLC44A1	chr9	+	105299742	105299937	105299219	105299309	105309723	105309866	13404	6,10	95,142	17,8	47,68	295	100	0.000904063416949	0.0191235875933	0.021,0.023	0.109,0.038	-0.051
61189	ENSG00000126432.14	PRDX5	chr11	+	64319733	64319868	64318120	64318386	64320864	64320903	61189	934,723	18,11	446,300	1,2	235	100	0.000904447711326	0.0191235875933	0.957,0.965	0.995,0.985	-0.029
58688	ENSG00000113648.17	MACROH2A1	chr5	-	135350822	135350913	135345967	135346057	135360496	135360604	58688	98,73	1,4	26,54	12,4	191	100	0.000906057919717	0.0191479630535	0.981,0.905	0.531,0.876	0.24
6170	ENSG00000161249.21	DMKN	chr19	-	35506125	35506185	35505938	35505986	35508204	35508240	6170	3,4	1,1	2,0	3,3	160	100	0.000907327071177	0.0191651099066	0.652,0.714	0.294,0.0	0.536
63506	ENSG00000105053.11	VRK3	chr19	-	49997503	49997570	49995190	49995275	50000789	50000854	63506	36,34	3,4	27,16	0,0	167	100	0.000907993013112	0.0191695045355	0.878,0.836	1.0,1.0	-0.143
15770	ENSG00000151466.12	SCLT1	chr4	-	128942995	128943188	128936654	128936851	128946006	128946152	15770	13,28	0,0	49,54	0,7	293	100	0.000909343282914	0.0191883349492	1.0,1.0	1.0,0.725	0.137
32055	ENSG00000172954.14	LCLAT1	chr2	+	30552492	30552649	30533115	30533314	30562145	30562292	32055	5,3	10,4	2,0	12,21	257	100	0.000910764596415	0.0191989727235	0.163,0.226	0.061,0.0	0.164
45876	ENSG00000100445.18	SDR39U1	chr14	-	24441677	24441795	24440782	24440926	24442177	24442260	45876	365,228	2,0	258,118	11,0	218	100	0.000910364381262	0.0191989727235	0.988,1.0	0.915,1.0	0.036
73108	ENSG00000067365.15	METTL22	chr16	+	8644556	8644725	8642462	8642565	8646107	8646191	73108	32,15	0,0	19,28	2,3	269	100	0.000912038912584	0.0192161595749	1.0,1.0	0.779,0.776	0.222
972	ENSG00000102225.17	CDK16	chrX	+	47222260	47222380	47218690	47219105	47223551	47223759	972	15,12	34,33	23,18	18,3	220	100	0.000912989133574	0.0192265040629	0.167,0.142	0.367,0.732	-0.395
38902	ENSG00000237651.8	C2orf74	chr2	+	61159317	61159439	61157861	61158012	61162841	61162955	38902	10,10	60,39	0,3	32,36	222	100	0.00091513012029	0.0192619017023	0.07,0.104	0.0,0.036	0.069
35737	ENSG00000135597.19	REPS1	chr6	-	138917554	138917624	138915857	138915976	138920214	138920316	35737	583,730	0,1	157,376	6,7	170	100	0.00091661176817	0.0192833928012	1.0,0.998	0.939,0.969	0.045
9130	ENSG00000221829.11	FANCG	chr9	-	35078140	35078343	35077263	35077399	35078604	35078736	9130	40,18	2,3	35,4	0,0	303	100	0.000919578478841	0.0193360889084	0.868,0.664	1.0,1.0	-0.234
73301	ENSG00000166669.14	ATF7IP2	chr16	+	10387377	10387494	10386054	10386122	10414573	10414612	73301	9,6	6,0	2,6	0,0	217	100	0.000923257177735	0.0194036956556	0.409,1.0	1.0,1.0	-0.295
13918	ENSG00000135912.11	TTLL4	chr2	+	218727268	218727347	218710834	218711037	218737578	218739163	13918	23,10	2,3	8,14	0,0	179	100	0.000924032474936	0.0194102456413	0.865,0.651	1.0,1.0	-0.242
35492	ENSG00000123106.11	CCDC91	chr12	+	28226139	28226199	28225794	28225861	28257201	28257245	35492	0,2	2,3	1,2	1,0	160	100	0.0009246470858	0.0194134153696	0.0,0.294	0.385,1.0	-0.545
74212	ENSG00000125107.19	CNOT1	chr16	-	58624652	58624794	58623281	58623409	58629727	58629815	74212	37,28	4,2	24,13	0,0	242	100	0.000925599538338	0.019423671515	0.793,0.853	1.0,1.0	-0.177
46513	ENSG00000076351.13	SLC46A1	chr17	-	28402237	28402321	28400609	28400766	28404615	28405468	46513	34,55	10,8	24,25	0,2	184	100	0.000928063696069	0.0194656245671	0.649,0.789	1.0,0.872	-0.217
50945	ENSG00000132386.11	SERPINF1	chr17	+	1766902	1766994	1762028	1762113	1769851	1770028	50945	1376,930	25,8	244,66	8,8	192	100	0.000928708644382	0.0194693977952	0.966,0.984	0.941,0.811	0.099
1192	ENSG00000047634.15	SCML1	chrX	+	17745455	17745539	17737550	17737680	17746017	17746098	1192	1,0	52,45	6,3	36,23	184	100	0.000931004982017	0.0194785225248	0.01,0.0	0.083,0.066	-0.07
54477	ENSG00000182150.19	ERCC6L2	chr9	+	95971543	95971595	95970575	95970656	95971932	95973088	54477	0,0	23,8	1,4	2,10	152	100	0.000929958044894	0.0194785225248	0.0,0.0	0.248,0.208	-0.228
54505	ENSG00000130958.13	SLC35D2	chr9	-	96343903	96343996	96324090	96324169	96360153	96360192	54505	9,12	2,0	4,7	7,3	193	100	0.000930720578719	0.0194785225248	0.7,1.0	0.228,0.547	0.462
69434	ENSG00000197381.17	ADARB1	chr21	+	45184473	45184593	45183361	45183510	45184922	45185091	69434	62,35	43,58	11,2	22,27	220	100	0.000930564360574	0.0194785225248	0.396,0.215	0.185,0.033	0.197
2015	ENSG00000180957.19	PITPNB	chr22	-	27854853	27854939	27851668	27853663	27858386	27858509	2015	237,200	6,7	299,450	0,4	186	100	0.00093341602734	0.0195094667921	0.955,0.939	1.0,0.984	-0.045
11494	ENSG00000141552.18	ANAPC11	chr17	+	81893551	81893614	81891731	81891833	81894466	81894586	11494	101,69	47,16	139,61	22,2	163	100	0.000933204780561	0.0195094667921	0.569,0.726	0.795,0.949	-0.225
9952	ENSG00000138777.20	PPA2	chr4	-	105424195	105424322	105405636	105405948	105437949	105438036	9952	40,41	4,3	56,52	1,0	227	100	0.000934692932225	0.0195264069898	0.815,0.858	0.961,1.0	-0.144
62064	ENSG00000246174.10	KCTD21-AS1	chr11	+	78148976	78149093	78141594	78141702	78173819	78173977	62064	1,0	0,2	1,1	0,0	217	100	0.000936188439986	0.019547894783	1.0,0.0	1.0,1.0	-0.5
74852	ENSG00000231312.8	MAP4K3-DT	chr2	+	39646261	39646390	39557981	39558046	39665086	39665343	74852	2,5	0,0	0,6	6,0	229	100	0.000936675367511	0.0195483121938	1.0,1.0	0.0,1.0	0.5
31941	ENSG00000236283.5	ENSG00000236283	chr2	+	164960898	164960967	164959254	164959360	165091119	165091299	31941	18,14	0,0	7,5	6,0	169	100	0.000938896199031	0.0195848975448	1.0,1.0	0.408,1.0	0.296
1821	ENSG00000198089.16	SFI1	chr22	+	31604868	31604945	31602211	31602293	31606327	31606430	1821	17,17	6,1	28,9	1,0	177	100	0.000942190894916	0.0196438355656	0.615,0.906	0.941,1.0	-0.21
13888	ENSG00000086200.17	IPO11	chr5	+	62476682	62476753	62474415	62474464	62483100	62483293	13888	36,24	0,0	17,12	0,6	171	100	0.000943030859255	0.0196515614349	1.0,1.0	1.0,0.539	0.23
28554	ENSG00000113649.13	TCERG1	chr5	+	146462017	146462096	146459214	146459337	146463550	146463793	28554	63,79	526,711	41,55	140,332	179	100	0.000944527305815	0.0196643305559	0.063,0.058	0.141,0.085	-0.052
33151	ENSG00000197965.12	MPZL1	chr1	+	167773235	167773368	167765582	167765749	167787819	167787844	33151	105,77	4,4	94,73	0,0	233	100	0.000944583034704	0.0196643305559	0.918,0.892	1.0,1.0	-0.095
52657	ENSG00000178209.17	PLEC	chr8	-	143922503	143925884	143915152	143922395	143926783	143926882	52657	912,579	6,2	783,376	11,14	3481	100	0.000946548816656	0.0196954603426	0.814,0.893	0.672,0.436	0.299
28190	ENSG00000146433.10	TMEM181	chr6	+	158625103	158625206	158608658	158608750	158631322	158631389	28190	8,3	0,0	1,1	0,4	203	100	0.000948190055929	0.0197100182182	1.0,1.0	1.0,0.11	0.445
33655	ENSG00000248049.8	UBA6-DT	chr4	+	67731505	67732345	67730073	67730170	67745826	67746366	33655	115,98	5,2	35,138	0,1	940	100	0.000947912233573	0.0197100182182	0.71,0.839	1.0,0.936	-0.194
50174	ENSG00000168003.19	SLC3A2	chr11	+	62876783	62876879	62871576	62871669	62881018	62881447	50174	78,57	124,77	119,54	62,50	196	100	0.000948781117558	0.0197125168668	0.243,0.274	0.495,0.355	-0.166
7558	ENSG00000009950.16	MLXIPL	chr7	-	73606973	73607018	73605687	73605768	73616070	73616161	7558	6,9	44,47	0,0	10,3	145	100	0.000952386576344	0.0197776111204	0.086,0.117	0.0,0.0	0.102
29562	ENSG00000165240.22	ATP7A	chrX	+	77962622	77962814	77910705	77910835	77971620	77971761	29562	4,8	1,0	6,12	4,5	292	100	0.000956225981633	0.0198474966391	0.578,1.0	0.339,0.451	0.394
23377	ENSG00000137312.15	FLOT1	chr6	-	30741791	30741867	30741189	30741333	30742146	30742203	23377	150,112	20,33	46,26	21,25	176	100	0.000958033285305	0.0198710516587	0.81,0.659	0.554,0.371	0.272
69510	ENSG00000033170.17	FUT8	chr14	+	65430215	65430309	65413068	65413214	65455620	65455718	69510	2,4	5,7	0,0	5,5	194	100	0.000958310122987	0.0198710516587	0.171,0.228	0.0,0.0	0.2
70668	ENSG00000167522.17	ANKRD11	chr16	-	89313316	89313589	89291012	89291183	89316932	89317078	70668	45,26	1,4	37,30	0,0	373	100	0.000959331013163	0.019882372706	0.923,0.635	1.0,1.0	-0.221
53448	ENSG00000213930.12	GALT	chr9	+	34647474	34647567	34646899	34647258	34647831	34647961	53448	4,0	2,2	4,2	0,1	193	100	0.000960264417016	0.0198918702713	0.509,0.0	1.0,0.509	-0.5
23827	ENSG00000163719.20	MTMR14	chr3	+	9697710	9697866	9688943	9689082	9701789	9702216	23827	14,6	5,0	23,3	0,0	256	100	0.00096251872823	0.0199287074962	0.522,1.0	1.0,1.0	-0.239
18308	ENSG00000132466.20	ANKRD17	chr4	-	73147240	73147432	73146763	73146873	73148812	73149050	18308	379,417	4,9	349,484	1,0	292	100	0.000963243796708	0.0199338613688	0.97,0.941	0.992,1.0	-0.04
44484	ENSG00000155975.10	VPS37A	chr8	+	17268257	17268372	17247122	17247369	17268855	17268956	44484	22,29	0,0	16,25	2,3	215	100	0.000964153222861	0.0199428234561	1.0,1.0	0.788,0.795	0.208
40478	ENSG00000135622.13	SEMA4F	chr2	+	74673456	74673576	74657564	74657624	74674497	74674676	40478	22,9	5,5	12,2	1,0	220	100	0.000967770947887	0.0200077682634	0.667,0.45	0.845,1.0	-0.364
71532	ENSG00000138600.11	SPPL2A	chr15	-	50726072	50726126	50725220	50725323	50726320	50726377	71532	12,1	0,1	4,10	4,8	154	100	0.000970729623024	0.0200590304383	1.0,0.394	0.394,0.448	0.276
53888	ENSG00000204852.17	TCTN1	chr12	+	110644966	110645143	110640382	110640517	110647210	110647262	53888	11,15	5,5	2,3	10,3	277	100	0.000973581018192	0.0201080263081	0.443,0.52	0.067,0.265	0.316
55117	ENSG00000077157.22	PPP1R12B	chr1	+	202443086	202443127	202442525	202442572	202445045	202445228	55117	6,5	6,8	4,8	0,2	141	100	0.00097477836516	0.0201228285293	0.415,0.307	1.0,0.739	-0.508
48594	ENSG00000165689.17	ENTR1	chr9	-	136410089	136410239	136408998	136409067	136410327	136410609	48594	48,37	2,4	31,12	0,0	250	100	0.00097533756212	0.0201244490085	0.906,0.787	1.0,1.0	-0.153
16889	ENSG00000122126.18	OCRL	chrX	+	129557860	129557950	129557324	129557435	129558632	129558753	16889	121,158	18,10	75,84	3,1	190	100	0.000977353594462	0.0201561124296	0.78,0.893	0.929,0.978	-0.117
58455	ENSG00000269609.6	C10orf95-AS1	chr10	+	102451398	102451555	102450186	102450330	102455336	102456293	58455	4,2	7,6	0,0	23,4	257	100	0.00098280959941	0.0202586528209	0.182,0.115	0.0,0.0	0.148
41691	ENSG00000138386.17	NAB1	chr2	+	190649845	190649982	190649082	190649360	190655976	190656153	41691	79,65	2,6	72,89	1,0	237	100	0.000988629395873	0.0203685874302	0.943,0.82	0.968,1.0	-0.103
2748	ENSG00000142149.9	HUNK	chr21	+	31990128	31990176	31983525	31983609	31995767	31995927	2748	39,21	3,4	54,25	1,0	148	100	0.000989936171741	0.0203754561602	0.898,0.78	0.973,1.0	-0.147
16110	ENSG00000053254.16	FOXN3	chr14	-	89125327	89125440	89124870	89125226	89180700	89180744	16110	2,6	0,0	1,0	0,2	213	100	0.00098985033919	0.0203754561602	1.0,1.0	1.0,0.0	0.5
5759	ENSG00000155229.21	MMS19	chr10	-	97468251	97468406	97467504	97467583	97469645	97469723	5759	83,63	0,1	59,48	8,0	255	100	0.000991803183129	0.0203838194706	1.0,0.961	0.743,1.0	0.109
69488	ENSG00000125952.20	MAX	chr14	-	65101545	65101572	65093497	65093815	65102303	65102339	69488	118,145	90,124	37,111	62,148	127	100	0.000991795863562	0.0203838194706	0.508,0.479	0.32,0.371	0.148
74342	ENSG00000120662.16	MTRF1	chr13	-	41262410	41262481	41261332	41261825	41263484	41263538	74342	4,5	0,9	14,13	0,0	171	100	0.000991237012407	0.0203838194706	1.0,0.245	1.0,1.0	-0.377
370	ENSG00000101966.14	XIAP	chrX	+	123860166	123860293	123859826	123859905	123885630	123886539	370	10,6	0,0	8,9	0,6	227	100	0.000994137401743	0.020411751998	1.0,1.0	1.0,0.398	0.301
74980	ENSG00000033100.17	CHPF2	chr7	+	151236407	151236590	151235047	151235612	151237373	151238681	74980	104,80	6,2	30,34	0,0	283	100	0.000994117227974	0.020411751998	0.86,0.934	1.0,1.0	-0.103
70661	ENSG00000167522.17	ANKRD11	chr16	-	89290624	89291183	89288527	89288670	89305205	89305239	70661	708,439	0,0	421,240	2,6	659	100	0.00100073509521	0.0205371444907	1.0,1.0	0.97,0.859	0.086
68942	ENSG00000196792.12	STRN3	chr14	-	30918965	30919106	30913523	30913657	30929200	30929311	68942	67,34	46,51	38,26	12,9	241	100	0.00100392732091	0.0205925611415	0.377,0.217	0.568,0.545	-0.26
68451	ENSG00000148335.15	NTMT1	chr9	+	129632649	129632801	129626174	129626295	129634053	129634306	68451	107,92	2,6	75,49	0,0	252	100	0.00100614563661	0.0206279564528	0.955,0.859	1.0,1.0	-0.093
52364	ENSG00000070731.11	ST6GALNAC2	chr17	-	76570564	76570668	76567452	76567552	76572636	76572775	52364	3,3	0,0	0,2	4,0	204	100	0.00100957450536	0.0206881236744	1.0,1.0	0.0,1.0	0.5
33508	ENSG00000146802.13	TMEM168	chr7	-	112772780	112772818	112767174	112767744	112775175	112775318	33508	19,10	3,2	28,19	0,0	138	100	0.00101461848052	0.0207813124692	0.821,0.784	1.0,1.0	-0.198
38446	ENSG00000071054.17	MAP4K4	chr2	+	101859735	101859864	101855976	101856138	101864929	101865036	38446	412,315	18,15	350,353	9,2	229	100	0.00102047672537	0.0208910797592	0.909,0.902	0.944,0.987	-0.06
29182	ENSG00000111481.10	COPZ1	chr12	+	54343224	54343316	54342205	54342287	54345459	54345475	29182	841,631	21,18	1095,896	8,13	192	100	0.00102124995398	0.0208966907739	0.954,0.948	0.986,0.973	-0.029
2306	ENSG00000215193.14	PEX26	chr22	+	18085111	18085258	18083436	18083732	18087971	18105396	2306	128,86	11,11	114,74	4,1	247	100	0.0010226070788	0.0209040260517	0.825,0.76	0.92,0.968	-0.151
49978	ENSG00000129197.15	RPAIN	chr17	+	5426235	5426299	5425970	5426082	5428070	5428211	49978	60,28	5,2	57,30	0,0	164	100	0.00102248258068	0.0209040260517	0.88,0.895	1.0,1.0	-0.113
68546	ENSG00000084623.12	EIF3I	chr1	+	32226170	32226320	32222439	32222630	32228498	32228609	68546	224,187	8,6	263,184	2,1	250	100	0.00102600357053	0.0209632208298	0.918,0.926	0.981,0.987	-0.062
43156	ENSG00000196290.17	NIF3L1	chr2	+	200891735	200891789	200889368	200889652	200891917	200892379	43156	12,11	20,17	5,2	35,12	154	100	0.00102763013913	0.020986212573	0.28,0.296	0.085,0.098	0.197
15390	ENSG00000168255.20	POLR2J3	chr7	-	102568009	102568184	102566996	102567083	102569834	102569924	15390	10,22	26,9	10,24	1,4	275	100	0.0010285833421	0.0209954371609	0.123,0.471	0.784,0.686	-0.438
8733	ENSG00000118007.13	STAG1	chr3	-	136591444	136591549	136568764	136568861	136604308	136604473	8733	0,0	34,16	2,4	10,8	205	100	0.00103067319624	0.0210176002731	0.0,0.0	0.089,0.196	-0.143
15018	ENSG00000102897.10	LYRM1	chr16	+	20915555	20915714	20900234	20900535	20920121	20920214	15018	724,654	18,26	343,796	4,10	259	100	0.00103040303737	0.0210176002731	0.94,0.907	0.971,0.968	-0.046
52105	ENSG00000254166.4	CASC19	chr8	-	127174189	127174364	127168137	127169117	127203162	127203220	52105	1,1	0,0	1,1	3,0	275	100	0.00103127330428	0.0210195992618	1.0,1.0	0.108,1.0	0.446
4040	ENSG00000132623.16	ANKEF1	chr20	+	10035578	10035642	10034986	10035333	10038257	10038647	4040	10,10	17,12	2,1	13,10	164	100	0.00103258051494	0.021030477972	0.264,0.337	0.086,0.057	0.229
36251	ENSG00000042088.14	TDP1	chr14	+	89956577	89956800	89954938	89955677	89963107	89963552	36251	40,56	6,0	55,45	0,0	323	100	0.00103325441103	0.021030477972	0.674,1.0	1.0,1.0	-0.163
57161	ENSG00000242086.8	MUC20-OT1	chr3	+	195718023	195718196	195708656	195708841	195724679	195724818	57161	0,10	6,7	0,0	3,1	273	100	0.00103331406159	0.021030477972	0.0,0.344	0.0,0.0	0.172
17148	ENSG00000118785.15	SPP1	chr4	+	87980045	87980126	87975713	87977097	87980392	87980434	17148	6275,6040	50,30	1140,2128	29,15	181	100	0.00103476222318	0.0210476813866	0.986,0.991	0.956,0.987	0.017
17696	ENSG00000174032.17	SLC25A30	chr13	-	45408926	45409074	45405882	45405977	45411361	45411480	17696	159,148	5,1	96,60	8,6	248	100	0.00103516483877	0.0210476813866	0.928,0.984	0.829,0.801	0.141
65329	ENSG00000181090.21	EHMT1	chr9	+	137802856	137803010	137800879	137800984	137811460	137811491	65329	10,15	27,20	3,1	14,20	254	100	0.0010370221538	0.0210752099363	0.127,0.228	0.078,0.019	0.129
29576	ENSG00000164081.13	TEX264	chr3	+	51674270	51674562	51671174	51671288	51684412	51684467	29576	302,291	8,10	122,45	0,1	392	100	0.00103873075094	0.0210956052667	0.906,0.881	1.0,0.92	-0.067
52281	ENSG00000184640.20	SEPTIN9	chr17	+	77307140	77307197	77281498	77281554	77402058	77402200	52281	595,453	91,38	628,132	36,10	157	100	0.00103903351391	0.0210956052667	0.806,0.884	0.917,0.894	-0.06
6164	ENSG00000161249.21	DMKN	chr19	-	35502829	35502886	35502135	35502183	35505717	35505765	6164	141,141	2,1	48,47	0,9	157	100	0.00104199938584	0.0211383472286	0.978,0.989	1.0,0.769	0.099
29887	ENSG00000116138.13	DNAJC16	chr1	+	15560130	15560329	15559607	15559656	15562141	15562325	29887	5,2	8,9	0,0	8,19	299	100	0.00104214854126	0.0211383472286	0.173,0.069	0.0,0.0	0.121
960	ENSG00000102317.18	RBM3	chrX	+	48575814	48576083	48575560	48575667	48576313	48576419	960	130,197	173,148	83,73	38,41	369	100	0.00104354203673	0.0211563619214	0.169,0.265	0.372,0.325	-0.132
68762	ENSG00000100802.15	C14orf93	chr14	-	22999956	23000117	22998772	22999156	23010100	23010143	68762	7,7	1,4	1,0	1,1	261	100	0.00104617420141	0.0211994593137	0.728,0.401	0.277,0.0	0.426
49794	ENSG00000284024.4	ENSG00000284024	chr10	+	14842133	14842846	14840074	14840157	14843370	14846999	49794	73,72	3,2	53,53	0,0	813	100	0.00104735409503	0.0212131007201	0.75,0.816	1.0,1.0	-0.217
68079	ENSG00000134874.18	DZIP1	chr13	-	95622342	95622480	95619884	95619947	95624767	95624929	68079	179,206	0,2	124,198	6,5	238	100	0.00105032482987	0.0212629830766	1.0,0.977	0.897,0.943	0.069
24026	ENSG00000143258.17	USP21	chr1	+	161162614	161162726	161162269	161162390	161162918	161163074	24026	70,56	2,5	67,78	0,0	212	100	0.00105135493687	0.0212735497497	0.943,0.841	1.0,1.0	-0.108
38692	ENSG00000145604.17	SKP2	chr5	+	36163644	36164695	36152770	36153042	36166518	36166662	38692	59,54	2,2	68,38	0,0	1151	100	0.00105617082883	0.0213400539329	0.719,0.701	1.0,1.0	-0.29
48244	ENSG00000141401.12	IMPA2	chr18	+	12008332	12008591	11999053	11999187	12009882	12009987	48244	17,10	96,51	34,38	105,66	359	100	0.0010552647019	0.0213400539329	0.047,0.052	0.083,0.138	-0.061
78580	ENSG00000071564.18	TCF3	chr19	-	1615284	1615515	1612206	1612433	1615685	1615821	78580	123,96	132,115	37,18	89,33	331	100	0.0010556874396	0.0213400539329	0.22,0.201	0.112,0.141	0.084
7934	ENSG00000015520.15	NPC1L1	chr7	-	44536841	44536942	44536255	44536428	44538816	44540342	7934	10,12	0,0	5,3	0,12	201	100	0.00106028538733	0.0214073873728	1.0,1.0	1.0,0.111	0.445
57882	ENSG00000196693.15	ZNF33B	chr10	-	42632294	42632439	42631807	42632024	42636919	42636972	57882	92,96	3,1	46,46	14,2	245	100	0.00106052601006	0.0214073873728	0.926,0.975	0.573,0.904	0.212
35446	ENSG00000080618.17	CPB2	chr13	-	46067306	46067417	46064647	46064741	46073872	46073977	35446	590,549	63,59	321,225	22,7	211	100	0.00106492769534	0.0214858785375	0.816,0.815	0.874,0.938	-0.091
23670	ENSG00000145390.12	USP53	chr4	+	119235289	119235411	119217549	119217673	119239217	119239312	23670	0,0	7,2	4,2	6,6	222	100	0.00106703040584	0.021517932534	0.0,0.0	0.231,0.131	-0.181
9396	ENSG00000168397.17	ATG4B	chr2	+	241651883	241652012	241651263	241651335	241653306	241653333	9396	10,6	28,38	2,0	22,20	229	100	0.00107177671719	0.0215742891391	0.135,0.065	0.038,0.0	0.081
14522	ENSG00000183666.19	GUSBP1	chr5	+	21471461	21471646	21461782	21461866	21473356	21474438	14522	4,3	0,0	2,1	0,5	285	100	0.00107188633487	0.0215742891391	1.0,1.0	1.0,0.066	0.467
52581	ENSG00000104529.19	EEF1D	chr8	-	143590607	143590729	143589510	143590081	143597347	143597415	52581	12,9	55,52	0,0	9,4	222	100	0.00107055934761	0.0215742891391	0.089,0.072	0.0,0.0	0.08
73720	ENSG00000169592.15	INO80E	chr16	+	30004567	30004657	30001211	30001530	30005220	30005762	73720	7,5	32,16	0,0	6,1	190	100	0.00107149498623	0.0215742891391	0.103,0.141	0.0,0.0	0.122
11171	ENSG00000043143.22	JADE2	chr5	+	134576767	134576896	134573644	134573762	134578493	134578818	11171	76,67	6,4	93,90	2,0	229	100	0.00107913459941	0.0216888958254	0.847,0.88	0.953,1.0	-0.113
21992	ENSG00000263961.8	RHEX	chr1	+	206097732	206097839	206053172	206053265	206098080	206098181	21992	9,9	0,0	1,0	0,2	207	100	0.00107837815643	0.0216888958254	1.0,1.0	1.0,0.0	0.5
50492	ENSG00000114867.22	EIF4G1	chr3	+	184315762	184315856	184314494	184314674	184317320	184317431	50492	28,30	5,4	6,1	6,2	194	100	0.00107875285396	0.0216888958254	0.743,0.794	0.34,0.205	0.496
17782	ENSG00000100330.16	MTMR3	chr22	+	30023456	30023483	30022608	30022697	30025629	30026037	17782	5,1	15,11	0,0	9,7	127	100	0.00108159975585	0.0217175893423	0.208,0.067	0.0,0.0	0.138
57068	ENSG00000135502.19	SLC26A10	chr12	+	57625624	57625752	57625409	57625464	57625997	57626150	57068	14,7	0,0	1,2	0,5	228	100	0.00108114777681	0.0217175893423	1.0,1.0	1.0,0.149	0.425
44189	ENSG00000154556.20	SORBS2	chr4	-	185690561	185690611	185684753	185684846	185775230	185775366	44189	20,25	0,0	8,2	2,2	150	100	0.00108361026345	0.0217475281301	1.0,1.0	0.727,0.4	0.436
32294	ENSG00000103248.19	MTHFSD	chr16	-	86551972	86552146	86548463	86548577	86554644	86554751	32294	10,7	0,0	9,11	6,0	274	100	0.00108498524891	0.0217553372662	1.0,1.0	0.354,1.0	0.323
71954	ENSG00000108557.20	RAI1	chr17	+	17724027	17724159	17681457	17681793	17792932	17793143	71954	136,169	0,10	105,98	0,0	232	100	0.00108503867698	0.0217553372662	1.0,0.879	1.0,1.0	-0.06
75898	ENSG00000145725.21	PPIP5K2	chr5	+	103183233	103183407	103180020	103180188	103184671	103184744	75898	35,12	15,20	6,9	27,28	274	100	0.00109269115977	0.0218982840612	0.46,0.18	0.075,0.105	0.23
8502	ENSG00000108021.22	TASOR2	chr10	+	5720259	5720397	5717658	5717750	5720543	5720668	8502	6,7	49,57	14,23	37,65	238	100	0.00109431695634	0.0219203729077	0.049,0.049	0.137,0.129	-0.084
40803	ENSG00000234608.9	MAPKAPK5-AS1	chr12	-	111841326	111841470	111839767	111840477	111841683	111841896	40803	50,35	4,2	53,35	0,0	244	100	0.00109640695603	0.0219517346792	0.837,0.878	1.0,1.0	-0.143
14481	ENSG00000130340.17	SNX9	chr6	+	157876168	157876478	157875050	157875176	157896826	157896998	14481	8,6	37,9	4,8	2,2	410	100	0.00109873410064	0.0219680094183	0.05,0.14	0.328,0.494	-0.316
36743	ENSG00000117543.22	DPH5	chr1	-	101013709	101013818	101001466	101001544	101021640	101021765	36743	34,46	3,7	13,20	7,10	209	100	0.00109879402178	0.0219680094183	0.844,0.759	0.471,0.489	0.322
72916	ENSG00000187535.14	IFT140	chr16	-	1571406	1571534	1566160	1566291	1580758	1580850	72916	27,19	7,3	13,7	1,0	228	100	0.00109872841165	0.0219680094183	0.628,0.735	0.851,1.0	-0.244
63854	ENSG00000010626.15	LRRC23	chr12	+	6912729	6913027	6909889	6910026	6913890	6914194	63854	30,42	2,3	41,16	0,0	398	100	0.00110013661428	0.021973864197	0.79,0.779	1.0,1.0	-0.216
78474	ENSG00000060069.18	CTDP1	chr18	+	79728906	79729069	79717809	79718016	79736354	79736521	78474	167,143	31,26	166,192	10,19	263	100	0.00109967430778	0.021973864197	0.672,0.677	0.863,0.793	-0.153
5311	ENSG00000196437.12	ZNF569	chr19	-	37454833	37455073	37444906	37444964	37465312	37465473	5311	4,3	5,12	4,18	2,7	340	100	0.00110193027001	0.0219899882267	0.19,0.068	0.37,0.431	-0.271
28929	ENSG00000163714.18	U2SURP	chr3	+	143054942	143055119	143053675	143053794	143056311	143056500	28929	1250,1111	10,15	1255,1539	5,3	277	100	0.001102503795	0.0219899882267	0.978,0.964	0.989,0.995	-0.021
31796	ENSG00000175387.16	SMAD2	chr18	-	47920071	47920169	47896520	47896809	47930360	47930599	31796	1,1	32,27	2,6	18,8	198	100	0.00110251965336	0.0219899882267	0.016,0.018	0.053,0.275	-0.147
44722	ENSG00000131697.18	NPHP4	chr1	-	5909151	5909213	5905631	5905780	5927648	5927787	44722	7,7	0,7	2,1	0,0	162	100	0.0011093676376	0.022116036261	1.0,0.382	1.0,1.0	-0.309
67863	ENSG00000136122.18	BORA	chr13	+	72731280	72731387	72728925	72729093	72737961	72738043	67863	20,28	1,1	9,32	2,9	207	100	0.00111372111915	0.0221922582833	0.906,0.931	0.685,0.632	0.26
26244	ENSG00000126391.14	FRMD8	chr11	+	65393572	65393674	65389360	65389528	65394040	65394099	26244	5,6	0,0	10,4	5,0	202	100	0.00111867562018	0.0222803781346	1.0,1.0	0.498,1.0	0.251
26275	ENSG00000107404.21	DVL1	chr1	-	1337017	1337055	1336411	1336515	1337976	1338183	26275	3,1	228,124	5,1	19,10	138	100	0.00112200390769	0.0223360407016	0.009,0.006	0.16,0.068	-0.107
33373	ENSG00000114999.8	TTL	chr2	+	112520281	112520425	112502911	112503181	112528680	112541739	33373	181,119	3,6	135,171	0,0	244	100	0.00112879756925	0.0224606037246	0.961,0.89	1.0,1.0	-0.075
59755	ENSG00000133195.12	SLC39A11	chr17	-	73073666	73073835	73031555	73031714	73084807	73084846	59755	4,4	16,5	0,0	7,1	269	100	0.00113090807938	0.0224919081916	0.085,0.229	0.0,0.0	0.157
13882	ENSG00000107290.14	SETX	chr9	-	132269402	132269489	132261355	132264985	132269614	132269702	13882	62,70	31,30	21,39	23,40	187	100	0.00113349049731	0.0225287524483	0.517,0.555	0.328,0.343	0.201
50066	ENSG00000119720.18	NRDE2	chr14	-	90302719	90303125	90301238	90301372	90303934	90304382	50066	93,54	4,2	64,13	0,0	506	100	0.00113383689021	0.0225287524483	0.821,0.842	1.0,1.0	-0.169
75567	ENSG00000178999.13	AURKB	chr17	-	8210176	8210249	8207570	8207625	8210529	8210559	75567	84,60	2,6	61,29	0,0	173	100	0.00113593413191	0.0225597165239	0.96,0.853	1.0,1.0	-0.094
55161	ENSG00000136856.18	SLC2A8	chr9	+	127397904	127398111	127397375	127397538	127399906	127400006	55161	70,36	6,0	20,2	0,0	307	100	0.00113718984928	0.0225739464391	0.792,1.0	1.0,1.0	-0.104
33890	ENSG00000162599.18	NFIA	chr1	+	61385870	61385924	61383236	61383365	61404103	61404267	33890	6,14	101,137	0,0	15,40	154	100	0.00113875281887	0.0225942591289	0.037,0.062	0.0,0.0	0.05
6815	ENSG00000242588.7	ENSG00000242588	chr7	+	128578889	128578933	128574719	128574791	128591849	128592017	6815	9,22	0,2	8,11	6,3	144	100	0.00114414884125	0.0226831022518	1.0,0.884	0.481,0.718	0.343
61598	ENSG00000110075.15	PPP6R3	chr11	+	68515027	68515166	68460747	68460827	68519500	68519651	61598	2,6	9,15	0,0	4,10	239	100	0.00114431415158	0.0226831022518	0.085,0.143	0.0,0.0	0.114
24447	ENSG00000170364.13	SETMAR	chr3	+	4313646	4313761	4303336	4303526	4316211	4316536	24447	17,24	3,2	22,14	0,0	215	100	0.00114961524949	0.0227719362908	0.725,0.848	1.0,1.0	-0.214
44923	ENSG00000144130.12	NT5DC4	chr2	+	112726677	112726738	112726237	112726289	112729626	112729704	44923	15,15	4,1	6,4	0,0	161	100	0.0011507356926	0.0227719362908	0.7,0.903	1.0,1.0	-0.199
53199	ENSG00000286156.3	BMS1P23	chr2	-	94201819	94202043	94200721	94200844	94202396	94202568	53199	3,4	2,1	0,1	2,2	324	100	0.00115048613198	0.0227719362908	0.316,0.552	0.0,0.134	0.367
63712	ENSG00000072121.17	ZFYVE26	chr14	-	67805216	67805305	67804100	67804264	67805453	67805618	63712	18,15	0,1	8,1	3,1	189	100	0.00115150410497	0.0227719362908	1.0,0.888	0.585,0.346	0.478
68288	ENSG00000174446.13	SNAPC5	chr15	-	66495329	66495419	66493467	66494552	66497489	66497759	68288	74,90	1,0	93,84	0,10	190	100	0.00115151532611	0.0227719362908	0.975,1.0	1.0,0.816	0.08
38197	ENSG00000131778.20	CHD1L	chr1	+	147270931	147271005	147268781	147268878	147272170	147272281	38197	438,327	6,5	688,472	29,16	174	100	0.00115289120768	0.0227776264321	0.977,0.974	0.932,0.944	0.038
43526	ENSG00000077380.16	DYNC1I2	chr2	+	171707232	171707377	171692776	171692894	171715327	171715368	43526	232,142	0,10	293,185	1,0	245	100	0.00115275797517	0.0227776264321	1.0,0.853	0.992,1.0	-0.07
18537	ENSG00000158402.21	CDC25C	chr5	-	138289479	138289563	138287168	138287267	138290638	138290740	18537	28,27	1,0	33,27	1,7	184	100	0.00115507453129	0.0227884991765	0.938,1.0	0.947,0.677	0.157
40387	ENSG00000143363.17	PRUNE1	chr1	+	151028785	151028944	151027232	151027327	151033805	151033837	40387	392,403	86,129	72,176	46,77	259	100	0.0011540035426	0.0227884991765	0.638,0.547	0.377,0.469	0.17
65144	ENSG00000135537.17	AFG1L	chr6	+	108355653	108355755	108346987	108347039	108356689	108356751	65144	21,12	0,6	17,29	0,0	202	100	0.00115490598566	0.0227884991765	1.0,0.498	1.0,1.0	-0.251
19714	ENSG00000119778.15	ATAD2B	chr2	-	23799824	23799993	23798137	23798323	23810315	23810502	19714	7,0	5,5	0,0	9,8	269	100	0.00115828221443	0.0228332725827	0.342,0.0	0.0,0.0	0.171
71525	ENSG00000138592.14	USP8	chr15	+	50471632	50471795	50465046	50465191	50476848	50476993	71525	186,224	0,1	148,211	10,0	263	100	0.00115843475375	0.0228332725827	1.0,0.988	0.849,1.0	0.07
35332	ENSG00000081803.17	CADPS2	chr7	-	122436359	122436380	122416060	122416164	122438340	122438376	35332	11,7	25,11	2,3	34,14	121	100	0.00115935587052	0.0228406745973	0.267,0.345	0.046,0.15	0.208
33109	ENSG00000163322.14	ABRAXAS1	chr4	-	83472221	83472288	83470202	83470396	83476642	83476679	33109	72,78	7,4	64,98	2,0	167	100	0.00116437205835	0.0229287094181	0.86,0.921	0.95,1.0	-0.084
62966	ENSG00000182985.18	CADM1	chr11	-	115198405	115198438	115178643	115178775	115209573	115209657	62966	37,27	118,122	13,3	86,63	133	100	0.00116510193932	0.0229322955758	0.191,0.143	0.102,0.035	0.098
75076	ENSG00000197912.16	SPG7	chr16	+	89540943	89541384	89532462	89532636	89544647	89544772	75076	169,150	64,65	146,166	34,33	541	100	0.00116571818947	0.0229336428582	0.328,0.299	0.443,0.482	-0.149
60953	ENSG00000149532.16	CPSF7	chr11	-	61421053	61421130	61420469	61420573	61421389	61421608	60953	8,7	82,52	13,8	38,6	177	100	0.00116748243556	0.0229575632526	0.052,0.071	0.162,0.43	-0.234
30487	ENSG00000168803.16	ADAL	chr15	+	43334944	43335170	43333310	43333434	43335695	43335826	30487	58,61	2,4	75,57	0,0	326	100	0.00117739807622	0.0231333670606	0.899,0.824	1.0,1.0	-0.139
33748	ENSG00000106290.16	TAF6	chr7	-	100113348	100113405	100112797	100112917	100113615	100113769	33748	236,242	8,7	118,101	0,0	157	100	0.00117752789218	0.0231333670606	0.949,0.957	1.0,1.0	-0.047
10597	ENSG00000103852.13	TTC23	chr15	-	99234987	99235080	99228532	99228732	99249416	99249610	10597	5,3	18,16	0,0	4,21	193	100	0.00118188477666	0.0232080704385	0.126,0.089	0.0,0.0	0.107
73168	ENSG00000258867.8	LINC01146	chr14	+	88044685	88044848	88024518	88024669	88096498	88097630	73168	29,38	50,55	26,37	15,26	263	100	0.0011839517508	0.023237759047	0.181,0.208	0.397,0.351	-0.179
68077	ENSG00000134874.18	DZIP1	chr13	-	95599364	95599424	95593943	95594086	95606002	95606059	68077	175,163	5,5	86,106	9,11	160	100	0.00118845675705	0.0233152493598	0.956,0.953	0.857,0.858	0.097
14236	ENSG00000117335.21	CD46	chr1	+	207769947	207770123	207767012	207767195	207770320	207770362	14236	24,18	27,29	7,15	42,40	276	100	0.00119844829774	0.0235002519836	0.244,0.184	0.057,0.12	0.126
18768	ENSG00000105852.11	PON3	chr7	-	95377532	95377676	95372172	95372338	95390153	95390209	18768	67,52	82,112	12,20	48,67	244	100	0.00120088568862	0.0235370221695	0.251,0.16	0.093,0.109	0.105
44131	ENSG00000128641.19	MYO1B	chr2	+	191402631	191402718	191400381	191400468	191408114	191408189	44131	93,68	17,15	83,107	4,9	187	100	0.00120224915972	0.0235527192661	0.745,0.708	0.917,0.864	-0.164
5242	ENSG00000068903.21	SIRT2	chr19	-	38898378	38898425	38893818	38893971	38899505	38899618	5242	4,3	27,42	6,4	10,2	147	100	0.0012035263281	0.0235556941215	0.092,0.046	0.29,0.576	-0.364
16633	ENSG00000099219.15	ERMP1	chr9	-	5805610	5805785	5801175	5801328	5810010	5810118	16633	67,49	15,6	80,128	2,8	275	100	0.0012032323067	0.0235556941215	0.619,0.748	0.936,0.853	-0.211
2134	ENSG00000228315.12	GUSBP11	chr22	-	23686830	23686995	23683724	23683867	23690231	23690356	2134	18,12	10,1	14,4	1,0	265	100	0.00120959001096	0.0236580856732	0.404,0.819	0.841,1.0	-0.309
11913	ENSG00000237765.8	FAM200B	chr4	+	15684849	15684959	15681756	15681901	15686235	15686396	11913	6,9	23,31	0,5	27,58	210	100	0.00121061207592	0.0236580856732	0.11,0.121	0.0,0.039	0.096
59479	ENSG00000005801.18	ZNF195	chr11	-	3360719	3360788	3357926	3360565	3361742	3361889	59479	0,2	14,15	2,2	1,1	169	100	0.00121101821564	0.0236580856732	0.0,0.073	0.542,0.542	-0.506
74211	ENSG00000125107.19	CNOT1	chr16	-	58623281	58623409	58599262	58599511	58629727	58629885	74211	6,9	221,146	15,6	98,55	228	100	0.00121040577714	0.0236580856732	0.012,0.026	0.063,0.046	-0.036
1541	ENSG00000100395.15	L3MBTL2	chr22	+	41213892	41214026	41209695	41209933	41216138	41216262	1541	92,52	3,5	27,10	0,0	234	100	0.001218882317	0.0238006101685	0.929,0.816	1.0,1.0	-0.127
35015	ENSG00000177879.17	AP3S1	chr5	+	115895086	115895158	115870016	115870128	115902884	115902992	35015	1976,2552	92,88	2250,4475	68,94	172	100	0.00122379641669	0.0238854251677	0.926,0.944	0.951,0.965	-0.023
60386	ENSG00000166352.18	IFTAP	chr11	+	36636050	36636117	36610103	36610239	36648015	36648155	60386	50,27	22,12	52,77	11,8	167	100	0.00122771926964	0.0239508234965	0.576,0.574	0.739,0.852	-0.221
19424	ENSG00000214021.17	TTLL3	chr3	+	9833103	9833245	9828678	9829395	9834680	9834907	19424	12,10	80,137	0,0	24,37	242	100	0.00123140896996	0.0240004359997	0.058,0.029	0.0,0.0	0.044
69465	ENSG00000168488.19	ATXN2L	chr16	+	28836448	28836485	28835932	28836176	28836750	28837237	69465	8,4	16,23	1,0	14,2	137	100	0.00123113740684	0.0240004359997	0.267,0.113	0.05,0.0	0.165
70851	ENSG00000224078.15	SNHG14	chr15	+	25080124	25080229	25078861	25078995	25081090	25081224	70851	0,3	60,53	7,3	37,19	205	100	0.00123509714631	0.0240590739318	0.0,0.027	0.084,0.072	-0.065
77024	ENSG00000171634.19	BPTF	chr17	+	67928958	67929120	67928354	67928601	67929335	67929487	77024	72,92	72,60	24,70	10,13	262	100	0.00123556691636	0.0240590739318	0.276,0.369	0.478,0.673	-0.253
21867	ENSG00000114268.12	PFKFB4	chr3	-	48543579	48543646	48539410	48539771	48549863	48549960	21867	280,249	0,0	197,112	1,9	167	100	0.0012404967462	0.0240918142383	1.0,1.0	0.992,0.882	0.063
23398	ENSG00000148187.18	MRRF	chr9	+	122265461	122265780	122264886	122264938	122270863	122271075	23398	34,31	20,35	59,48	12,18	419	100	0.0012399709498	0.0240918142383	0.289,0.175	0.54,0.389	-0.233
25901	ENSG00000186654.21	PRR5	chr22	+	44735026	44735162	44732250	44732391	44736771	44736786	25901	39,7	0,2	8,3	4,2	236	100	0.00124032252027	0.0240918142383	1.0,0.597	0.459,0.389	0.374
43501	ENSG00000163694.15	RBM47	chr4	-	40436440	40436885	40432650	40432862	40437770	40438924	43501	17,26	3,1	14,16	0,0	545	100	0.0012399054863	0.0240918142383	0.51,0.827	1.0,1.0	-0.332
55991	ENSG00000075407.19	ZNF37A	chr10	+	38094930	38095224	38094333	38094490	38095537	38095559	55991	23,23	2,4	29,11	1,0	394	100	0.00124127656305	0.0240918142383	0.745,0.593	0.88,1.0	-0.271
60827	ENSG00000161533.12	ACOX1	chr17	-	75960214	75960375	75957420	75957566	75978533	75978693	60827	71,71	5,2	51,38	0,0	261	100	0.00123953553825	0.0240918142383	0.845,0.932	1.0,1.0	-0.111
74699	ENSG00000103091.15	WDR59	chr16	-	74899697	74899754	74893678	74893812	74903946	74904100	74699	14,0	92,62	0,0	46,23	157	100	0.00124117028294	0.0240918142383	0.088,0.0	0.0,0.0	0.044
26573	ENSG00000121644.19	DESI2	chr1	+	244689248	244689342	244686596	244686669	244691878	244691922	26573	163,137	32,16	212,117	71,36	194	100	0.00124363717176	0.0240929524275	0.724,0.815	0.606,0.626	0.153
45212	ENSG00000090661.12	CERS4	chr19	+	8241340	8241457	8210705	8210862	8251075	8251249	45212	32,30	46,62	9,7	53,21	217	100	0.00124214821347	0.0240929524275	0.243,0.182	0.073,0.133	0.109
53494	ENSG00000261832.6	ENSG00000261832	chr16	-	28491481	28491513	28489289	28489386	28491713	28491835	53494	13,12	4,1	15,11	0,0	132	100	0.00124341068348	0.0240929524275	0.711,0.901	1.0,1.0	-0.194
77669	ENSG00000011243.19	AKAP8L	chr19	-	15403657	15403715	15403474	15403555	15404009	15404042	77669	135,122	2,1	83,81	4,7	158	100	0.00124251346779	0.0240929524275	0.977,0.987	0.929,0.88	0.077
29531	ENSG00000143367.17	TUFT1	chr1	+	151564524	151564614	151563903	151563990	151566162	151566228	29531	26,34	6,0	38,25	0,0	190	100	0.00124495555854	0.0241056456021	0.695,1.0	1.0,1.0	-0.153
38079	ENSG00000205268.11	PDE7A	chr8	-	65726874	65726966	65724776	65724921	65727169	65727301	38079	61,57	6,1	41,49	0,0	192	100	0.00124544396124	0.0241056456021	0.841,0.967	1.0,1.0	-0.096
72067	ENSG00000115657.14	ABCB6	chr2	-	219216651	219216832	219216363	219216465	219218124	219218994	72067	387,263	8,4	289,191	0,0	281	100	0.00124778969923	0.0241398871341	0.945,0.959	1.0,1.0	-0.048
46069	ENSG00000117523.18	PRRC2C	chr1	+	171589368	171589605	171588378	171588505	171591151	171591204	46069	54,58	55,62	10,24	19,61	337	100	0.00125670391245	0.0242898934879	0.226,0.217	0.135,0.105	0.102
70943	ENSG00000186566.13	GPATCH8	chr17	-	44467096	44467114	44464471	44464544	44474828	44474903	70943	1,7	34,39	0,0	30,37	118	100	0.00125619258048	0.0242898934879	0.024,0.132	0.0,0.0	0.078
7003	ENSG00000075790.12	BCAP29	chr7	+	107613653	107613732	107613331	107613432	107616260	107616389	7003	2,0	3,2	5,15	3,2	179	100	0.00125883354049	0.0243198274908	0.271,0.0	0.482,0.807	-0.509
30706	ENSG00000146416.19	AIG1	chr6	+	143334077	143334095	143333281	143333445	143335050	143335530	30706	2,3	3,3	0,1	5,5	118	100	0.00126198201632	0.0243413673943	0.361,0.459	0.0,0.145	0.338
42408	ENSG00000048707.15	VPS13D	chr1	+	12338230	12338305	12335704	12335827	12341779	12341885	42408	5,3	7,6	0,1	6,4	175	100	0.00126119984049	0.0243413673943	0.29,0.222	0.0,0.125	0.194
56202	ENSG00000152457.19	DCLRE1C	chr10	-	14945434	14945565	14945104	14945189	14947524	14947609	56202	2,4	0,1	0,4	1,2	231	100	0.00126227418161	0.0243413673943	1.0,0.634	0.0,0.464	0.585
60238	ENSG00000149100.13	EIF3M	chr11	+	32588593	32588732	32583797	32583929	32589546	32589641	60238	262,160	6,17	283,136	2,4	239	100	0.00126154535332	0.0243413673943	0.948,0.797	0.983,0.934	-0.086
50708	ENSG00000198836.11	OPA1	chr3	+	193617783	193617837	193615673	193615770	193618868	193618936	50708	4,2	6,3	8,3	1,1	154	100	0.00126603831514	0.0244027136572	0.302,0.302	0.839,0.661	-0.448
72919	ENSG00000206053.13	JPT2	chr16	+	1683508	1683592	1678276	1678356	1685438	1685587	72919	54,44	224,162	15,3	124,37	184	100	0.00126815790386	0.024432319671	0.116,0.129	0.062,0.042	0.07
27426	ENSG00000203778.8	FAM229B	chr6	+	112097040	112097201	112087590	112087720	112099269	112099408	27426	21,17	1,0	17,10	3,2	261	100	0.00126992835814	0.0244439313625	0.889,1.0	0.685,0.657	0.273
40945	ENSG00000106692.15	FKTN	chr9	+	105598085	105598183	105596597	105596657	105601144	105601348	40945	6,3	25,16	0,0	12,8	198	100	0.00126944743163	0.0244439313625	0.108,0.087	0.0,0.0	0.098
52301	ENSG00000132294.15	EFR3A	chr8	+	132000768	132000998	131996389	131996497	132001758	132001807	52301	10,12	157,86	1,6	295,272	330	100	0.0012729552923	0.0244909344265	0.019,0.041	0.001,0.007	0.026
61594	ENSG00000162337.12	LRP5	chr11	+	68445572	68445686	68439872	68439916	68446435	68446533	61594	6,5	311,393	17,6	213,170	214	100	0.00127410089175	0.0245017151278	0.009,0.006	0.036,0.016	-0.018
63670	ENSG00000111206.13	FOXM1	chr12	-	2865354	2865399	2864682	2864752	2866392	2866521	63670	270,219	499,519	172,298	247,395	145	100	0.00127693169762	0.0245360896263	0.272,0.225	0.324,0.342	-0.085
71193	ENSG00000188549.13	CCDC9B	chr15	-	40339511	40339619	40338747	40338903	40339904	40340015	71193	23,19	4,2	40,16	1,0	208	100	0.00127706053495	0.0245360896263	0.734,0.82	0.951,1.0	-0.199
46506	ENSG00000157020.18	SEC13	chr3	-	10319138	10319172	10318049	10318094	10321049	10321082	46506	7,16	298,272	31,5	147,173	134	100	0.00128040861197	0.0245891314404	0.017,0.042	0.136,0.021	-0.049
15757	ENSG00000246876.7	LINC02466	chr4	-	129744307	129744523	129726921	129727033	129749627	129749720	15757	0,0	6,3	2,8	8,0	316	100	0.00128323940673	0.0246288583667	0.0,0.0	0.073,1.0	-0.536
16347	ENSG00000156831.8	NSMCE2	chr8	+	125155999	125156098	125151170	125151277	125182102	125182430	16347	10,5	25,36	1,2	27,35	199	100	0.00128365386256	0.0246288583667	0.167,0.065	0.018,0.028	0.093
68259	ENSG00000213995.12	NAXD	chr13	+	110625189	110625278	110624233	110624279	110627438	110627547	68259	28,9	1,4	9,1	0,0	189	100	0.00128520997419	0.0246474189507	0.937,0.543	1.0,1.0	-0.26
2371	ENSG00000160282.15	FTCD	chr21	-	46138507	46138646	46137238	46137334	46138879	46138923	2371	629,434	2,2	417,154	0,12	239	100	0.00129077668813	0.0247332355346	0.992,0.989	1.0,0.843	0.069
40812	ENSG00000126070.20	AGO3	chr1	+	36005718	36005858	36004340	36004475	36008689	36008777	40812	7,18	22,19	1,6	30,21	240	100	0.00129086634762	0.0247332355346	0.117,0.283	0.014,0.106	0.14
66833	ENSG00000111325.16	OGFOD2	chr12	+	122977980	122978091	122976870	122976970	122978359	122978569	66833	19,3	2,0	8,0	4,2	211	100	0.00129250600361	0.0247533228916	0.818,1.0	0.487,0.0	0.665
24446	ENSG00000170364.13	SETMAR	chr3	+	4312897	4313761	4303368	4303526	4316211	4317265	24446	104,85	3,2	72,69	0,0	964	100	0.00129401052883	0.0247684668392	0.782,0.815	1.0,1.0	-0.202
68271	ENSG00000144354.15	CDCA7	chr2	+	173363999	173364161	173363817	173363895	173364794	173364873	68271	55,40	43,50	66,25	29,8	262	100	0.00129507163289	0.0247684668392	0.328,0.234	0.465,0.544	-0.224
76741	ENSG00000006282.21	SPATA20	chr17	+	50547664	50547954	50547204	50547285	50548282	50548453	76741	12,13	5,3	4,2	9,3	390	100	0.00129500943694	0.0247684668392	0.381,0.526	0.102,0.146	0.33
48591	ENSG00000165689.17	ENTR1	chr9	-	136408998	136409067	136407825	136407938	136410089	136410239	48591	15,21	23,26	27,13	9,7	169	100	0.00129654744402	0.0247853692895	0.278,0.323	0.64,0.524	-0.282
3083	ENSG00000087586.18	AURKA	chr20	-	56390555	56390665	56388155	56388202	56392167	56392202	3083	29,30	62,52	35,35	34,17	210	100	0.00130193266322	0.0248326399589	0.182,0.216	0.329,0.495	-0.213
27247	ENSG00000079150.19	FKBP7	chr2	-	178473028	178473142	178469651	178469782	178478278	178478553	27247	8,6	6,7	1,2	6,12	214	100	0.00130107652558	0.0248326399589	0.384,0.286	0.072,0.072	0.263
32206	ENSG00000124356.17	STAMBP	chr2	+	73860533	73860589	73860051	73860151	73862202	73862304	32206	0,2	136,112	2,11	88,93	156	100	0.001301443293	0.0248326399589	0.0,0.011	0.014,0.07	-0.037
61451	ENSG00000173715.18	C11orf80	chr11	+	66839131	66839207	66838369	66838445	66842848	66843069	61451	7,3	46,46	0,0	43,49	176	100	0.00130198601958	0.0248326399589	0.08,0.036	0.0,0.0	0.058
65724	ENSG00000099330.9	OCEL1	chr19	+	17228802	17228915	17228253	17228309	17229008	17229215	65724	33,30	6,4	56,19	0,2	213	100	0.00130184414896	0.0248326399589	0.721,0.779	1.0,0.817	-0.158
60222	ENSG00000223482.10	NUTM2A-AS1	chr10	-	87330891	87331096	87326198	87326672	87336785	87336889	60222	66,80	33,39	15,36	27,32	305	100	0.0013026416028	0.0248338300097	0.396,0.402	0.154,0.269	0.188
61728	ENSG00000132849.22	PATJ	chr1	+	61766278	61766473	61763012	61763179	61769282	61769422	61728	27,42	0,1	11,26	0,7	295	100	0.0013039007155	0.0248420865262	1.0,0.934	1.0,0.557	0.189
61741	ENSG00000148481.14	MINDY3	chr10	-	15838227	15838279	15837203	15837318	15841425	15841599	61741	102,116	4,9	118,129	17,23	152	100	0.00130426146386	0.0248420865262	0.944,0.895	0.82,0.787	0.116
71903	ENSG00000196739.15	COL27A1	chr9	+	114194403	114194457	114183021	114183075	114195958	114196012	71903	442,274	236,152	306,71	243,85	154	100	0.00130604560261	0.0248647563225	0.549,0.539	0.45,0.352	0.143
66920	ENSG00000124786.12	SLC35B3	chr6	-	8418743	8418885	8417401	8417494	8419579	8419677	66920	4,4	23,12	0,0	12,25	242	100	0.0013207105144	0.0251325207661	0.067,0.121	0.0,0.0	0.094
28787	ENSG00000289720.1	ENSG00000289720	chr20	+	34515428	34515500	34507694	34507908	34526267	34526343	28787	2,2	1,2	0,0	2,5	172	100	0.00132132783197	0.0251328440188	0.538,0.368	0.0,0.0	0.453
14721	ENSG00000177150.13	FAM210A	chr18	-	13687742	13687882	13681604	13682105	13726328	13726663	14721	7,8	33,32	15,8	19,8	240	100	0.0013238039703	0.0251570827129	0.081,0.094	0.248,0.294	-0.184
23260	ENSG00000143889.16	HNRNPLL	chr2	-	38577919	38578002	38577460	38577532	38581912	38581985	23260	13,13	100,66	35,35	88,109	183	100	0.00132341469762	0.0251570827129	0.066,0.097	0.179,0.149	-0.082
73831	ENSG00000116586.12	LAMTOR2	chr1	+	156057977	156058067	156055084	156055425	156058314	156058506	73831	156,131	0,2	101,40	6,2	190	100	0.00133068546368	0.02526731845	1.0,0.972	0.899,0.913	0.08
74463	ENSG00000072736.19	NFATC3	chr16	+	68221195	68221284	68190767	68191775	68226349	68229258	74463	14,9	57,39	16,21	26,29	189	100	0.00133081182807	0.02526731845	0.115,0.109	0.246,0.277	-0.15
34935	ENSG00000176261.16	ZBTB8OS	chr1	-	32633950	32634072	32627507	32627544	32650432	32650525	34935	23,13	4,3	15,11	0,1	222	100	0.00133587061907	0.0253518692055	0.721,0.661	1.0,0.832	-0.225
71785	ENSG00000099875.16	MKNK2	chr19	-	2046603	2046691	2046366	2046468	2050800	2050853	71785	490,635	11,19	189,140	2,0	188	100	0.00133815263945	0.025383670254	0.96,0.947	0.98,1.0	-0.036
55096	ENSG00000165219.23	GAPVD1	chr9	+	125263550	125263700	125261830	125261959	125268935	125269054	55096	4,4	7,1	3,4	0,1	250	100	0.00133891147871	0.0253865620726	0.186,0.615	1.0,0.615	-0.407
60554	ENSG00000175224.17	ATG13	chr11	+	46621041	46621157	46618259	46618375	46630044	46630100	60554	0,0	14,7	4,3	9,14	216	100	0.00133990549424	0.025393908337	0.0,0.0	0.171,0.09	-0.131
51268	ENSG00000073417.15	PDE8A	chr15	+	85089337	85089416	85083555	85083644	85097947	85098036	51268	28,15	3,6	26,37	2,0	179	100	0.00134115088593	0.0254060098821	0.839,0.583	0.879,1.0	-0.229
30178	ENSG00000182473.22	EXOC7	chr17	-	76091142	76091235	76090328	76090397	76094413	76094581	30178	25,29	2,0	8,10	4,2	193	100	0.0013469265553	0.0255038807045	0.866,1.0	0.509,0.722	0.318
19323	ENSG00000151715.8	TMEM45B	chr11	+	129828146	129828253	129815862	129815898	129852474	129852660	19323	11,6	70,77	13,7	18,27	207	100	0.00135517931909	0.0256485452955	0.071,0.036	0.259,0.111	-0.132
29792	ENSG00000206573.11	THUMPD3-AS1	chr3	-	9395505	9395579	9390013	9391826	9397423	9397439	29792	9,4	15,17	0,1	7,5	174	100	0.00137345232368	0.0259357607266	0.256,0.119	0.0,0.103	0.136
64312	ENSG00000204177.12	BMS1P1	chr10	+	46798028	46798168	46790961	46791041	46808995	46809088	64312	19,21	3,5	6,16	0,1	240	100	0.00137298683947	0.0259357607266	0.725,0.636	1.0,0.87	-0.255
65857	ENSG00000133641.18	C12orf29	chr12	+	88040147	88040265	88035535	88035738	88042824	88042920	65857	51,55	5,7	52,40	2,0	218	100	0.00137171729355	0.0259357607266	0.824,0.783	0.923,1.0	-0.158
66454	ENSG00000111300.10	NAA25	chr12	-	112093050	112093136	112090725	112090864	112108715	112108783	66454	76,77	1,7	40,49	0,0	186	100	0.00137328622958	0.0259357607266	0.976,0.855	1.0,1.0	-0.085
75893	ENSG00000087111.21	PIGS	chr17	-	28571048	28571188	28570851	28570963	28571462	28571510	75893	49,24	0,1	26,4	6,0	240	100	0.00137120311581	0.0259357607266	1.0,0.909	0.644,1.0	0.132
6898	ENSG00000172765.19	TMCC1	chr3	-	129880308	129880559	129848345	129848412	129893493	129893532	6898	22,17	0,0	41,32	4,1	351	100	0.00137479491406	0.0259377147711	1.0,1.0	0.745,0.901	0.177
46479	ENSG00000135535.17	CD164	chr6	-	109370410	109370467	109366513	109369017	109376073	109376112	46479	556,400	39,27	212,275	28,38	157	100	0.00137429141128	0.0259377147711	0.901,0.904	0.828,0.822	0.078
22596	ENSG00000138663.9	COPS4	chr4	+	83073205	83073353	83068437	83068522	83075296	83075756	22596	8,6	72,52	0,2	67,74	248	100	0.00137686997996	0.0259651629329	0.043,0.044	0.0,0.011	0.038
67229	ENSG00000011304.22	PTBP1	chr19	+	799412	799443	797074	797505	803560	803636	67229	461,348	18,5	381,305	5,0	131	100	0.00137810706952	0.0259767908444	0.951,0.982	0.983,1.0	-0.025
40081	ENSG00000135926.15	TMBIM1	chr2	-	218284038	218284136	218281939	218282181	218285762	218285938	40081	5,9	51,59	0,0	24,11	198	100	0.00137908123219	0.025983454449	0.047,0.072	0.0,0.0	0.059
25093	ENSG00000137075.18	RNF38	chr9	-	36390466	36390616	36375933	36376127	36400096	36400269	25093	27,36	3,8	17,48	0,2	250	100	0.00138106998901	0.0260092195636	0.783,0.643	1.0,0.906	-0.24
38097	ENSG00000136933.17	RABEPK	chr9	+	125213369	125213522	125207563	125207721	125227909	125228059	38097	145,148	7,8	95,89	2,0	253	100	0.00138232224914	0.0260210975541	0.891,0.88	0.949,1.0	-0.089
70710	ENSG00000081154.12	PCNP	chr3	+	101579588	101580004	101574185	101574279	101585436	101585511	70710	592,551	14,13	370,407	37,15	516	100	0.00138789192423	0.0261142001833	0.891,0.891	0.66,0.84	0.141
71928	ENSG00000196739.15	COL27A1	chr9	+	114267503	114267557	114266564	114266618	114269240	114269294	71928	601,325	32,4	252,32	3,0	154	100	0.00138862001465	0.0261161621354	0.924,0.981	0.982,1.0	-0.038
27949	ENSG00000100226.16	GTPBP1	chr22	+	38708844	38708956	38705943	38706147	38715906	38715962	27949	178,147	1,1	111,132	9,1	212	100	0.00139196390163	0.0261672962469	0.988,0.986	0.853,0.984	0.069
7024	ENSG00000230510.9	PPP5D1P	chr19	-	46589145	46589235	46526924	46527072	46600882	46600915	7024	1,0	0,2	4,4	0,0	190	100	0.00139483357824	0.0261760904701	1.0,0.0	1.0,1.0	-0.5
7025	ENSG00000230510.9	PPP5D1P	chr19	-	46589145	46589235	46576598	46576717	46600882	46600915	7025	1,0	0,2	4,4	0,0	190	100	0.00139483357824	0.0261760904701	1.0,0.0	1.0,1.0	-0.5
37064	ENSG00000119185.13	ITGB1BP1	chr2	-	9419989	9420100	9418625	9418732	9423372	9423480	37064	43,31	160,79	60,31	110,28	211	100	0.00139493270844	0.0261760904701	0.113,0.157	0.205,0.344	-0.139
52126	ENSG00000254166.4	CASC19	chr8	-	127197474	127197564	127168421	127169117	127218809	127219237	52126	2,1	0,0	1,0	0,2	190	100	0.00139483261315	0.0261760904701	1.0,1.0	1.0,0.0	0.5
20862	ENSG00000225663.8	MCRIP1	chr17	-	81823411	81823513	81822360	81823311	81824286	81824390	20862	351,139	8,4	314,61	0,0	202	100	0.00139634064391	0.026190771083	0.956,0.945	1.0,1.0	-0.05
72396	ENSG00000166716.10	ZNF592	chr15	+	84778182	84778312	84748591	84748664	84782656	84784895	72396	109,113	2,10	46,61	0,1	230	100	0.00139862922775	0.0262219492251	0.96,0.831	1.0,0.964	-0.087
42626	ENSG00000117481.11	NSUN4	chr1	+	46341322	46341497	46340819	46340919	46344800	46345144	42626	8,6	19,9	0,2	15,6	275	100	0.00140213307803	0.0262758734609	0.133,0.195	0.0,0.108	0.11
66835	ENSG00000111325.16	OGFOD2	chr12	+	122977980	122978199	122976870	122976970	122978359	122978569	66835	28,6	2,0	15,0	4,2	319	100	0.0014077418528	0.0263573849139	0.814,1.0	0.54,0.0	0.637
78810	ENSG00000070501.12	POLB	chr8	+	42354416	42354521	42352518	42352568	42355515	42355567	78810	20,16	57,33	6,9	46,61	205	100	0.00140731874673	0.0263573849139	0.146,0.191	0.06,0.067	0.105
28466	ENSG00000078319.12	PMS2P1	chr7	-	100325690	100325779	100318887	100321084	100330181	100330284	28466	52,40	7,0	19,20	0,0	189	100	0.00141264655048	0.0264373928636	0.797,1.0	1.0,1.0	-0.101
76892	ENSG00000170832.13	USP32	chr17	-	60271349	60271481	60269449	60269557	60288522	60288682	76892	291,226	6,8	306,374	0,4	232	100	0.00141340578674	0.026439782512	0.954,0.924	1.0,0.976	-0.049
28616	ENSG00000076864.21	RAP1GAP	chr1	-	21608212	21608350	21606065	21606197	21608849	21608936	28616	133,134	4,6	55,35	0,0	238	100	0.00141842687503	0.026507203427	0.933,0.904	1.0,1.0	-0.081
32623	ENSG00000167595.16	PROSER3	chr19	+	35765033	35765176	35764853	35764936	35766767	35766955	32623	93,98	4,5	22,16	0,0	243	100	0.00142014348796	0.026507203427	0.905,0.89	1.0,1.0	-0.103
61190	ENSG00000126432.14	PRDX5	chr11	+	64320660	64320792	64318120	64318386	64320864	64320903	61190	827,507	18,11	524,42	1,2	232	100	0.00141967129823	0.026507203427	0.952,0.952	0.996,0.901	0.003
70092	ENSG00000100600.15	LGMN	chr14	-	92704639	92704707	92703808	92704361	92709671	92709872	70092	148,204	35,40	162,160	25,4	168	100	0.00142002970786	0.026507203427	0.716,0.752	0.794,0.96	-0.143
75015	ENSG00000172530.22	BANP	chr16	+	87978439	87978692	87975047	87975203	87981035	87981102	75015	3,3	0,1	5,0	4,2	353	100	0.00142017573837	0.026507203427	1.0,0.459	0.262,0.0	0.599
11394	ENSG00000250903.11	GMDS-DT	chr6	+	2397220	2397626	2263600	2263684	2398576	2398778	11394	35,20	0,5	24,26	0,0	506	100	0.00142098369652	0.0265104645521	1.0,0.442	1.0,1.0	-0.279
4858	ENSG00000105287.13	PRKD2	chr19	-	46713862	46714001	46710906	46711038	46716130	46716220	4858	43,27	4,2	26,2	0,0	239	100	0.00142527155167	0.0265786162631	0.818,0.85	1.0,1.0	-0.166
32296	ENSG00000103248.19	MTHFSD	chr16	-	86552178	86552292	86548463	86548577	86554644	86554748	32296	34,29	0,0	21,43	6,0	214	100	0.00143040729532	0.026656914108	1.0,1.0	0.621,1.0	0.19
53131	ENSG00000099810.21	MTAP	chr9	+	21859302	21859425	21854630	21854870	21931007	21937651	53131	95,70	8,7	64,35	0,2	223	100	0.00143074372389	0.026656914108	0.842,0.818	1.0,0.887	-0.114
55683	ENSG00000011105.14	TSPAN9	chr12	+	3281733	3281817	3281197	3281329	3283044	3286559	55683	74,73	6,2	53,29	0,0	184	100	0.00143168003059	0.0266624930964	0.87,0.952	1.0,1.0	-0.089
34124	ENSG00000186591.13	UBE2H	chr7	-	129858901	129858941	129839206	129839335	129879567	129879642	34124	47,49	5,2	29,42	10,10	140	100	0.00143424983727	0.0266984746275	0.87,0.946	0.674,0.75	0.196
39355	ENSG00000122203.15	KIAA1191	chr5	-	176359461	176359567	176348249	176348356	176359810	176359918	39355	51,70	14,5	10,25	6,16	206	100	0.00143622096139	0.026720803577	0.639,0.872	0.447,0.431	0.317
65596	ENSG00000111596.14	CNOT2	chr12	+	70297758	70297879	70294236	70294294	70310894	70311017	65596	3,4	5,19	0,0	6,5	221	100	0.00143672587727	0.026720803577	0.214,0.087	0.0,0.0	0.15
32641	ENSG00000115998.8	C2orf42	chr2	-	70190542	70190715	70182666	70182935	70190972	70191002	32641	10,0	7,20	1,0	20,22	273	100	0.00143803884888	0.0267271118347	0.344,0.0	0.018,0.0	0.163
70639	ENSG00000180229.12	HERC2P3	chr15	-	20466194	20466370	20462830	20463001	20483402	20483517	70639	5,5	18,10	2,0	20,17	276	100	0.00143834188376	0.0267271118347	0.091,0.153	0.035,0.0	0.104
61965	ENSG00000198382.9	UVRAG	chr11	+	76012926	76013102	76008806	76008867	76016814	76016980	61965	0,0	14,8	2,6	9,17	276	100	0.00143963465579	0.0267392656897	0.0,0.0	0.075,0.113	-0.094
22051	ENSG00000114120.14	SLC25A36	chr3	+	140966933	140967036	140966347	140966434	140970926	140970993	22051	40,41	11,9	25,16	15,17	203	100	0.00144738379082	0.0268712737928	0.642,0.692	0.451,0.317	0.283
10191	ENSG00000124641.16	MED20	chr6	-	41916784	41916939	41908951	41909522	41921004	41921093	10191	116,51	3,5	116,45	1,0	255	100	0.00144827704501	0.0268759390467	0.938,0.8	0.978,1.0	-0.12
7122	ENSG00000121716.21	PILRB	chr7	+	100353209	100353270	100352563	100353123	100355142	100355240	7122	101,95	1,10	39,20	0,0	161	100	0.00144989516401	0.0268940456541	0.984,0.855	1.0,1.0	-0.081
57163	ENSG00000242086.8	MUC20-OT1	chr3	+	195718026	195718196	195708746	195708841	195724679	195724737	57163	0,8	6,7	0,0	3,1	270	100	0.00145631542983	0.0270011715987	0.0,0.297	0.0,0.0	0.148
22365	ENSG00000184007.22	PTP4A2	chr1	-	31910037	31910112	31906420	31908960	31915894	31915987	22365	314,220	8,5	289,308	0,1	175	100	0.00145720831383	0.0270057662942	0.957,0.962	1.0,0.994	-0.037
3967	ENSG00000125846.17	ZNF133	chr20	+	18310168	18310306	18306297	18306393	18315071	18316979	3967	15,21	18,3	3,4	19,9	238	100	0.00146730296862	0.02718081362	0.259,0.746	0.062,0.157	0.393
75936	ENSG00000185842.16	DNAH14	chr1	+	225147103	225147249	225145325	225145379	225152004	225152073	75936	10,4	0,0	0,4	4,0	246	100	0.00147123579243	0.0272416127599	1.0,1.0	0.0,1.0	0.5
47922	ENSG00000127314.18	RAP1B	chr12	+	68650399	68650468	68648669	68648781	68654111	68654252	47922	119,162	1,3	148,282	7,16	169	100	0.00147331478255	0.0272581408483	0.986,0.97	0.926,0.913	0.058
72931	ENSG00000138834.15	MAPK8IP3	chr16	+	1758147	1758159	1748601	1748720	1759957	1760015	72931	86,51	4,6	77,48	0,1	112	100	0.00147343061602	0.0272581408483	0.95,0.884	1.0,0.977	-0.071
49972	ENSG00000129197.15	RPAIN	chr17	+	5425970	5426082	5422768	5422829	5432541	5432608	49972	15,13	23,21	33,19	6,12	212	100	0.0014757035873	0.0272881319268	0.235,0.226	0.722,0.428	-0.344
22046	ENSG00000114120.14	SLC25A36	chr3	+	140966347	140966434	140963126	140963227	140966933	140967036	22046	17,15	14,12	19,14	1,4	187	100	0.00147715526403	0.0272908672236	0.394,0.401	0.91,0.652	-0.384
72498	ENSG00000140525.20	FANCI	chr15	+	89278686	89278774	89276710	89276891	89281169	89281300	72498	150,135	0,1	40,39	1,5	188	100	0.00147682216838	0.0272908672236	1.0,0.986	0.955,0.806	0.112
6336	ENSG00000055609.21	KMT2C	chr7	-	152286299	152286376	152273704	152273867	152309965	152310075	6336	0,0	15,16	6,0	14,4	177	100	0.00148007264366	0.0273086122639	0.0,0.0	0.195,0.0	-0.098
9995	ENSG00000129315.11	CCNT1	chr12	-	48695998	48696162	48695758	48695829	48698137	48698183	9995	57,49	28,24	63,84	8,20	264	100	0.00147994177352	0.0273086122639	0.435,0.436	0.749,0.614	-0.246
27149	ENSG00000106400.12	ZNHIT1	chr7	+	101218318	101218485	101218165	101218217	101222603	101222774	27149	4,8	46,16	10,2	7,2	267	100	0.00147880971006	0.0273086122639	0.032,0.158	0.349,0.272	-0.215
26776	ENSG00000169359.16	SLC33A1	chr3	-	155833467	155833585	155829687	155829903	155842431	155842619	26776	41,29	4,2	9,32	0,0	218	100	0.00148587010865	0.0274035031272	0.825,0.869	1.0,1.0	-0.153
2627	ENSG00000159263.16	SIM2	chr21	+	36741716	36741864	36731044	36731151	36743386	36743555	2627	3,7	0,0	1,1	3,0	248	100	0.00148686433627	0.0274097646138	1.0,1.0	0.118,1.0	0.441
7652	ENSG00000067601.10	PMS2P4	chr7	-	67296936	67297049	67295448	67295801	67297216	67297303	7652	0,2	10,12	4,3	4,4	213	100	0.0014888258882	0.0274338449866	0.0,0.073	0.319,0.26	-0.253
59702	ENSG00000132254.13	ARFIP2	chr11	-	6478578	6478652	6478083	6478198	6478737	6478959	59702	8,8	145,105	0,0	87,84	174	100	0.00149193569863	0.0274790532438	0.031,0.042	0.0,0.0	0.037
37716	ENSG00000059377.18	TBXAS1	chr7	+	139780739	139780824	139778247	139778471	139782665	139782729	37716	10,4	0,0	1,0	0,2	185	100	0.00149350410376	0.0274958440211	1.0,1.0	1.0,0.0	0.5
69072	ENSG00000221926.13	TRIM16	chr17	-	15677574	15677721	15677175	15677280	15680864	15680918	69072	51,37	0,6	46,19	0,0	247	100	0.00149882097207	0.0275815999981	1.0,0.714	1.0,1.0	-0.143
25596	ENSG00000155256.18	ZFYVE27	chr10	+	97748268	97748364	97744728	97744915	97749473	97749586	25596	10,8	5,0	16,6	0,0	196	100	0.00150366516529	0.027646439238	0.505,1.0	1.0,1.0	-0.248
52863	ENSG00000248932.8	COPB2-DT	chr3	+	139419556	139419680	139389760	139389933	139423015	139423114	52863	11,6	1,3	14,6	0,0	224	100	0.00150353113299	0.027646439238	0.831,0.472	1.0,1.0	-0.349
45070	ENSG00000138376.11	BARD1	chr2	-	214730234	214730280	214728537	214729008	214730410	214730508	45070	0,1	20,25	1,7	17,25	146	100	0.00150567899825	0.0276591712425	0.0,0.027	0.039,0.161	-0.087
59760	ENSG00000175390.15	EIF3F	chr11	+	7991780	7991971	7987336	7987716	7992083	7992163	59760	287,184	8,3	201,21	0,0	291	100	0.00150505231157	0.0276591712425	0.925,0.955	1.0,1.0	-0.06
71835	ENSG00000175061.20	SNHG29	chr17	+	16439659	16439703	16439036	16439414	16440184	16440253	71835	340,255	887,741	289,192	586,316	144	100	0.00150658004042	0.0276635848211	0.21,0.193	0.255,0.297	-0.075
4938	ENSG00000007047.16	MARK4	chr19	+	45258988	45259189	45251270	45251639	45263112	45263166	4938	79,79	0,7	41,28	0,0	301	100	0.00150760402748	0.0276702510348	1.0,0.789	1.0,1.0	-0.105
36529	ENSG00000171617.15	ENC1	chr5	-	74637493	74637618	74636336	74636498	74640306	74641424	36529	59,73	73,58	29,54	15,17	225	100	0.0015102829531	0.0277072724941	0.264,0.359	0.462,0.585	-0.212
73300	ENSG00000166669.14	ATF7IP2	chr16	+	10387377	10387484	10386057	10386122	10414573	10414612	73300	5,5	6,0	2,3	0,0	207	100	0.00151303773726	0.0277456525933	0.287,1.0	1.0,1.0	-0.357
13088	ENSG00000109205.17	ODAM	chr4	+	70200101	70200149	70198578	70198626	70200496	70200601	13088	59,117	2000,2096	0,9	121,384	148	100	0.00151639450835	0.0277828691869	0.02,0.036	0.0,0.016	0.02
73177	ENSG00000258867.8	LINC01146	chr14	+	88079103	88079368	88025406	88025481	88084036	88084155	73177	77,106	7,9	74,82	3,0	365	100	0.00151638150721	0.0277828691869	0.751,0.763	0.871,1.0	-0.178
2179	ENSG00000100023.20	PPIL2	chr22	+	21675063	21675115	21672329	21672381	21681298	21681390	2179	160,180	8,6	88,95	0,1	152	100	0.00151788070112	0.0277979333125	0.929,0.952	1.0,0.984	-0.051
57129	ENSG00000242086.8	MUC20-OT1	chr3	+	195689338	195689438	195688366	195688797	195696360	195696425	57129	89,80	18,5	101,83	5,1	200	100	0.00152032847715	0.027830586662	0.712,0.889	0.91,0.976	-0.143
35045	ENSG00000171729.14	TMEM51	chr1	+	15210489	15210562	15152565	15152784	15214894	15215431	35045	28,20	26,18	10,10	49,15	173	100	0.00152257650268	0.0278595565055	0.384,0.391	0.106,0.278	0.196
11602	ENSG00000113240.14	CLK4	chr5	-	178622392	178622459	178618555	178618778	178623255	178623416	11602	4,5	20,35	0,1	15,46	167	100	0.0015241047197	0.027875335994	0.107,0.079	0.0,0.013	0.086
26100	ENSG00000123607.16	TTC21B	chr2	-	165864983	165865077	165858214	165858404	165870796	165871020	26100	4,1	6,1	0,0	1,3	194	100	0.00152600157597	0.0278978410384	0.256,0.34	0.0,0.0	0.298
49328	ENSG00000062194.16	GPBP1	chr5	+	57221375	57221396	57175945	57176400	57230845	57230969	49328	10,12	11,4	0,3	6,8	121	100	0.00152795019722	0.027921272373	0.429,0.713	0.0,0.237	0.452
17959	ENSG00000183137.15	CEP57L1	chr6	+	109155790	109155877	109155229	109155307	109159024	109159102	17959	125,96	0,0	92,100	4,4	187	100	0.00153554302691	0.028047778718	1.0,1.0	0.925,0.93	0.073
20967	ENSG00000120742.11	SERP1	chr3	-	150566900	150567106	150546789	150547072	150602943	150603170	20967	22,8	0,6	14,20	0,0	306	100	0.00153644893557	0.0280520866496	1.0,0.303	1.0,1.0	-0.349
52419	ENSG00000171204.13	TMEM126B	chr11	+	85629131	85629262	85628592	85628688	85631144	85631316	52419	14,11	45,46	14,18	21,18	231	100	0.00153888689645	0.0280843504446	0.119,0.094	0.224,0.302	-0.157
10013	ENSG00000137269.15	LRRC1	chr6	+	53878992	53879071	53842109	53842227	53882886	53882976	10013	37,30	0,0	38,24	0,6	179	100	0.00154649295133	0.0282031569464	1.0,1.0	1.0,0.691	0.155
21269	ENSG00000142910.16	TINAGL1	chr1	+	31577133	31577458	31576484	31576595	31579203	31579267	21269	146,125	5,2	163,87	0,0	425	100	0.00154744277948	0.0282031569464	0.873,0.936	1.0,1.0	-0.095
27305	ENSG00000139428.12	MMAB	chr12	-	109571648	109571710	109567817	109568863	109573346	109573480	27305	360,299	9,8	152,118	0,0	162	100	0.00154809159591	0.0282031569464	0.961,0.958	1.0,1.0	-0.04
29018	ENSG00000124370.11	MCEE	chr2	-	71110762	71110858	71109813	71110122	71116772	71116894	29018	0,4	1,2	2,8	0,0	196	100	0.0015477577282	0.0282031569464	0.0,0.505	1.0,1.0	-0.748
34489	ENSG00000146776.15	ATXN7L1	chr7	-	105620199	105620321	105613473	105614816	105624074	105624266	34489	28,56	0,6	18,12	0,0	222	100	0.00154906198546	0.0282085602528	1.0,0.808	1.0,1.0	-0.096
7371	ENSG00000127980.16	PEX1	chr7	-	92509328	92509411	92506993	92507126	92510943	92511047	7371	13,9	5,0	9,5	0,0	183	100	0.00155159878988	0.0282424710167	0.587,1.0	1.0,1.0	-0.207
50519	ENSG00000114859.16	CLCN2	chr3	-	184353541	184353795	184353249	184353422	184354100	184354314	50519	16,14	3,1	6,2	0,0	354	100	0.00155857184057	0.0283570665387	0.601,0.798	1.0,1.0	-0.3
25732	ENSG00000197622.13	CDC42SE1	chr1	-	151056650	151056786	151055676	151055993	151059478	151059615	25732	4,12	63,47	3,2	64,84	236	100	0.00155975894222	0.0283663371486	0.026,0.098	0.019,0.01	0.048
38096	ENSG00000136933.17	RABEPK	chr9	+	125213369	125213522	125207563	125207721	125220538	125220658	38096	454,536	7,18	345,473	16,31	253	100	0.00157847053696	0.0286817139886	0.962,0.922	0.895,0.858	0.065
54811	ENSG00000148158.17	SNX30	chr9	+	112817704	112817815	112804775	112804967	112830724	112830883	54811	379,324	12,6	280,230	3,0	211	100	0.00157805170868	0.0286817139886	0.937,0.962	0.978,1.0	-0.039
39458	ENSG00000179818.17	PCBP1-AS1	chr2	-	70053730	70053815	70051202	70051305	70055713	70055910	39458	4,7	2,2	11,24	0,1	185	100	0.00158279065161	0.0287477356311	0.519,0.654	1.0,0.928	-0.377
23786	ENSG00000143228.13	NUF2	chr1	+	163322866	163323095	163321889	163322066	163326031	163326174	23786	7,6	10,11	29,22	2,11	329	100	0.00159054463996	0.0288760413495	0.175,0.142	0.815,0.378	-0.438
61502	ENSG00000123191.16	ATP7B	chr13	-	51961836	51961913	51957515	51957607	51964871	51964876	61502	191,169	8,8	78,125	0,2	177	100	0.00159393556808	0.0289250596262	0.931,0.923	1.0,0.972	-0.059
7338	ENSG00000173295.10	FAM86B3P	chr8	+	8234482	8234584	8232793	8232874	8235815	8235949	7338	8,5	0,0	5,6	6,0	202	100	0.00159514178745	0.0289344068161	1.0,1.0	0.292,1.0	0.354
18851	ENSG00000188917.15	TRMT2B	chrX	-	101051250	101051366	101042041	101042312	101051783	101052116	18851	0,2	3,4	11,2	5,0	216	100	0.0015987171711	0.0289867017618	0.0,0.188	0.505,1.0	-0.658
34089	ENSG00000128563.13	PRKRIP1	chr7	+	102397619	102397698	102376211	102376322	102399547	102399648	34089	52,71	3,7	93,52	2,0	179	100	0.00160254791341	0.0290274812827	0.906,0.85	0.963,1.0	-0.104
59675	ENSG00000101040.20	ZMYND8	chr20	-	47220257	47220324	47209213	47210897	47221313	47221474	59675	533,626	11,14	401,486	23,21	167	100	0.00160206386388	0.0290274812827	0.967,0.964	0.913,0.933	0.042
61305	ENSG00000177697.19	CD151	chr11	+	834529	834591	832931	833026	836062	836153	61305	64,50	14,15	26,45	1,4	162	100	0.00160304638064	0.0290274812827	0.738,0.673	0.941,0.874	-0.202
25075	ENSG00000090615.16	GOLGA3	chr12	-	132824918	132825106	132821995	132822311	132828802	132828869	25075	1,0	1,2	4,6	0,6	288	100	0.00160745998665	0.0290502984243	0.258,0.0	1.0,0.258	-0.5
29137	ENSG00000079819.19	EPB41L2	chr6	-	130876673	130876775	130869658	130870126	130878103	130878250	29137	68,65	60,37	46,44	64,71	202	100	0.00160760551922	0.0290502984243	0.359,0.465	0.262,0.235	0.164
42396	ENSG00000197111.16	PCBP2	chr12	+	53464759	53464852	53462480	53462567	53467220	53467285	42396	1162,827	21,24	716,541	3,8	193	100	0.00160668214417	0.0290502984243	0.966,0.947	0.992,0.972	-0.026
46364	ENSG00000150995.21	ITPR1	chr3	+	4653841	4653886	4652122	4652218	4658123	4658278	46364	7,6	0,1	11,0	5,1	145	100	0.00160777598111	0.0290502984243	1.0,0.805	0.603,0.0	0.601
52962	ENSG00000250337.9	PURPL	chr5	+	27477638	27477801	27475534	27475695	27484925	27485029	52962	192,104	3,10	90,31	0,1	263	100	0.00160736864907	0.0290502984243	0.961,0.798	1.0,0.922	-0.082
14699	ENSG00000156162.16	DPY19L4	chr8	+	94738368	94738459	94726330	94726441	94739412	94739534	14699	37,29	1,0	8,30	0,6	191	100	0.0016100197358	0.0290782900083	0.951,1.0	1.0,0.724	0.114
50654	ENSG00000174718.12	RESF1	chr12	+	31987238	31987322	31970188	31970356	31992377	31992941	50654	24,15	2,3	5,21	0,0	184	100	0.00161340044852	0.0291267830001	0.867,0.731	1.0,1.0	-0.201
73240	ENSG00000180398.13	MCFD2	chr2	-	46910779	46910873	46909022	46909177	46915722	46915810	73240	9,5	289,216	8,4	80,5	194	100	0.00161492093857	0.0291416659885	0.016,0.012	0.049,0.292	-0.156
78579	ENSG00000071564.18	TCF3	chr19	-	1615284	1615485	1612206	1612433	1615685	1615798	78579	91,78	132,115	28,14	89,33	301	100	0.00162596134969	0.0293282515747	0.186,0.184	0.095,0.124	0.075
57165	ENSG00000242086.8	MUC20-OT1	chr3	+	195718043	195718196	195708746	195708841	195724679	195725022	57165	0,7	6,7	0,0	3,1	253	100	0.0016338072056	0.0294570795273	0.0,0.283	0.0,0.0	0.141
34709	ENSG00000132330.18	SCLY	chr2	+	238093860	238093944	238091217	238091254	238094419	238094522	34709	56,51	1,0	26,32	4,2	184	100	0.00163529902317	0.0294628696815	0.968,1.0	0.779,0.897	0.146
72244	ENSG00000103811.18	CTSH	chr15	-	78931868	78932038	78931450	78931506	78932371	78932458	72244	1,3	197,129	14,1	104,49	270	100	0.0016362396276	0.0294628696815	0.002,0.009	0.047,0.008	-0.022
73790	ENSG00000213468.7	FIRRE	chrX	-	131695843	131695913	131691522	131692636	131711650	131711744	73790	1,3	8,0	3,2	0,0	170	100	0.00163586943704	0.0294628696815	0.068,1.0	1.0,1.0	-0.466
65728	ENSG00000255339.6	ENSG00000255339	chr10	-	100509315	100509511	100509006	100509102	100516095	100516219	65728	48,36	3,3	14,2	0,0	296	100	0.00163864737524	0.0294935392796	0.844,0.802	1.0,1.0	-0.177
22576	ENSG00000160323.19	ADAMTS13	chr9	+	133457909	133458094	133456542	133456719	133458973	133459386	22576	13,15	4,1	24,15	0,1	285	100	0.00163978936552	0.0295014103083	0.533,0.84	1.0,0.84	-0.233
36478	ENSG00000065534.20	MYLK	chr3	-	123732895	123733102	123725943	123726078	123733686	123734222	36478	21,6	18,6	23,2	3,0	307	100	0.00164240939667	0.0295358545497	0.275,0.246	0.714,1.0	-0.597
66986	ENSG00000168038.11	ULK4	chr3	-	41937228	41937340	41935861	41935940	41938097	41938197	66986	2,3	2,5	0,0	4,1	212	100	0.00164373761622	0.0295470482194	0.321,0.221	0.0,0.0	0.271
58498	ENSG00000076685.19	NT5C2	chr10	-	103181184	103181328	103174857	103174982	103193235	103193261	58498	31,22	1,5	16,14	6,18	244	100	0.00165239295486	0.0296898845731	0.927,0.643	0.522,0.242	0.403
26092	ENSG00000154655.16	L3MBTL4	chr18	-	5969392	5969562	5954705	5956387	6080880	6080951	26092	13,10	0,5	17,15	0,0	270	100	0.0016543851149	0.0297129269993	1.0,0.426	1.0,1.0	-0.287
14698	ENSG00000156162.16	DPY19L4	chr8	+	94734629	94734754	94726330	94726441	94739412	94739534	14698	34,21	1,0	8,26	0,6	225	100	0.00165947283752	0.0297915224454	0.938,1.0	1.0,0.658	0.14
41476	ENSG00000106868.17	SUSD1	chr9	-	112080073	112080165	112062936	112063033	112098469	112098662	41476	59,38	0,1	22,15	6,0	192	100	0.00166075350808	0.0298017340831	1.0,0.952	0.656,1.0	0.148
56093	ENSG00000165609.13	NUDT5	chr10	-	12173717	12173813	12172489	12172866	12177792	12177900	56093	237,218	5,10	207,209	0,3	196	100	0.00166395917294	0.0298336834155	0.96,0.918	1.0,0.973	-0.047
65378	ENSG00000175215.11	CTDSP2	chr12	-	57826995	57827097	57826345	57826402	57827551	57827590	65378	254,206	0,0	256,278	4,8	202	100	0.00166341220767	0.0298336834155	1.0,1.0	0.969,0.945	0.043
48595	ENSG00000170854.18	RIOX2	chr3	-	97952151	97952252	97950785	97950888	97954391	97954495	48595	6,6	71,61	11,5	23,20	201	100	0.00166576462773	0.0298532688955	0.04,0.047	0.192,0.111	-0.108
22972	ENSG00000116580.20	GON4L	chr1	-	155832831	155832950	155826836	155827028	155853275	155853405	22972	1,0	59,72	2,8	28,53	219	100	0.00167336179698	0.0299765903426	0.008,0.0	0.032,0.064	-0.044
55760	ENSG00000148399.13	DPH7	chr9	-	137575708	137575892	137574751	137574843	137576079	137576167	55760	11,9	26,8	11,11	4,0	284	100	0.00167971838457	0.0300647328645	0.13,0.284	0.492,1.0	-0.539
60086	ENSG00000285897.1	ENSG00000285897	chr17	-	58360782	58360944	58357467	58358823	58370910	58371033	60086	66,36	6,0	5,8	0,0	262	100	0.0016791319711	0.0300647328645	0.808,1.0	1.0,1.0	-0.096
10595	ENSG00000103852.13	TTC23	chr15	-	99234987	99235078	99228552	99228732	99241364	99241559	10595	5,1	11,4	0,0	6,1	191	100	0.00168447382276	0.0301369643546	0.192,0.116	0.0,0.0	0.154
34929	ENSG00000176261.16	ZBTB8OS	chr1	-	32633644	32633727	32627507	32627544	32650432	32650525	34929	38,22	4,3	26,33	0,1	183	100	0.00168986172948	0.0302204448119	0.838,0.8	1.0,0.947	-0.155
26925	ENSG00000281903.2	LINC02246	chr21	-	14853273	14853431	14825522	14825624	14857541	14857708	26925	17,9	3,2	1,2	1,4	258	100	0.00169585952953	0.0303147562783	0.687,0.636	0.279,0.162	0.441
34285	ENSG00000122133.17	PAEP	chr9	+	135562359	135562433	135561845	135561897	135562819	135562893	34285	5,4	0,0	9,4	1,3	174	100	0.00169899104052	0.0303577720492	1.0,1.0	0.838,0.434	0.364
58969	ENSG00000115970.19	THADA	chr2	-	43592843	43592890	43592316	43592416	43595930	43596007	58969	0,0	15,17	1,6	26,3	147	100	0.00170418516227	0.0304375903662	0.0,0.0	0.025,0.576	-0.3
16295	ENSG00000138660.12	AP1AR	chr4	+	112262987	112263086	112260765	112260862	112265008	112265067	16295	379,407	19,11	446,624	9,6	199	100	0.00170704067382	0.0304755896842	0.909,0.949	0.961,0.981	-0.042
13778	ENSG00000137204.15	SLC22A7	chr6	+	43299091	43299097	43298259	43298751	43299389	43299493	13778	8,0	5,10	0,0	3,4	106	100	0.00170953090567	0.0305070380929	0.602,0.0	0.0,0.0	0.301
54582	ENSG00000172775.17	PSME3IP1	chr16	-	57178501	57178852	57174619	57174688	57185820	57186039	54582	66,66	2,6	39,42	1,0	451	100	0.00171235810325	0.0305444703846	0.88,0.709	0.896,1.0	-0.153
[truncated: 39,866 more rows]
