# Supplementary material for: Competition for the conserved branch point sequence influences physiological outcomes in pre-mRNA splicing
Source: bioRxiv preprint, doi:10.1101/2024.10.09.617384, version 2 (2025-10-08)
Supplement: Suppl Table S5 [file 617384_file07.xlsx]

## Sheet: Sheet1
Protein ID	Gene Name	APT_vs_2xDEL_log2 fold change	APT_vs_NE_log2 fold change	APT_vs_upDEL_log2 fold change	APT_vs_dnDEL_log2 fold change	APT_vs_rai14_log2 fold change	2xDEL_vs_NE_log2 fold change	2xDEL_vs_upDEL_log2 fold change	2xDEL_vs_dnDEL_log2 fold change	2xDEL_vs_rai14_log2 fold change	NE_vs_upDEL_log2 fold change	NE_vs_dnDEL_log2 fold change	NE_vs_rai14_log2 fold change	upDEL_vs_dnDEL_log2 fold change	upDEL_vs_rai14_log2 fold change	dnDEL_vs_rai14_log2 fold change	APT_vs_2xDEL_p.val	APT_vs_NE_p.val	APT_vs_upDEL_p.val	APT_vs_dnDEL_p.val	APT_vs_rai14_p.val	2xDEL_vs_NE_p.val	2xDEL_vs_upDEL_p.val	2xDEL_vs_dnDEL_p.val	2xDEL_vs_rai14_p.val	NE_vs_upDEL_p.val	NE_vs_dnDEL_p.val	NE_vs_rai14_p.val	upDEL_vs_dnDEL_p.val	upDEL_vs_rai14_p.val	dnDEL_vs_rai14_p.val	APT_vs_2xDEL_p.adj	APT_vs_NE_p.adj	APT_vs_upDEL_p.adj	APT_vs_dnDEL_p.adj	APT_vs_rai14_p.adj	2xDEL_vs_NE_p.adj	2xDEL_vs_upDEL_p.adj	2xDEL_vs_dnDEL_p.adj	2xDEL_vs_rai14_p.adj	NE_vs_upDEL_p.adj	NE_vs_dnDEL_p.adj	NE_vs_rai14_p.adj	upDEL_vs_dnDEL_p.adj	upDEL_vs_rai14_p.adj	dnDEL_vs_rai14_p.adj	APT_vs_2xDEL_significant	APT_vs_NE_significant	APT_vs_upDEL_significant
O43390	HNRNPR	-0.234	1.31	-0.214	-0.216	0.0483	1.55	0.0195	0.0173	0.282	-1.53	-1.53	-1.26	-0.00212	0.262	0.264	4.83e-09	2.03e-18	1.36e-08	1.21e-08	0.0136	2.54e-19	0.27	0.323	4.98e-10	2.99e-19	2.94e-19	3.27e-18	0.902	1.19e-09	1.08e-09	6.82e-08	2.33e-17	5.43e-08	6.58e-08	0.0211	5.97e-18	0.327	0.409	3.42e-09	1.01e-17	7.38e-18	6.05e-17	0.92	5.78e-08	7.73e-09	FALSE	TRUE	FALSE
O43719	HTATSF1	-0.019	0.41	0.447	-1.79	0.554	0.429	0.466	-1.77	0.573	0.0373	-2.2	0.145	-2.24	0.107	2.34	0.564	1.25e-08	4.41e-09	1.38e-16	3.26e-10	7.28e-09	2.67e-09	1.57e-16	2.16e-10	0.265	1.01e-17	0.000618	8.14e-18	0.00541	4.49e-18	0.638	2.13e-08	1.96e-08	1.63e-14	2.23e-09	1.4e-08	1.62e-08	3.84e-14	1.64e-09	0.283	1.27e-16	0.00082	1.55e-15	0.0161	1e-15	FALSE	FALSE	FALSE
O43809	NUDT21	-0.0554	-0.0721	-0.247	-1.2	-0.144	-0.0167	-0.192	-1.15	-0.0886	-0.175	-1.13	-0.0719	-0.955	0.103	1.06	0.186	0.0925	3.37e-05	3.05e-13	0.00313	0.681	0.000347	5.51e-13	0.044	0.000737	6.62e-13	0.0932	5.42e-12	0.0224	1.51e-12	0.249	0.0974	7.37e-05	7.41e-12	0.00543	0.688	0.000729	2.04e-11	0.063	0.000971	2.53e-12	0.103	8.57e-11	0.0528	2.96e-11	FALSE	FALSE	FALSE
O60506	SYNCRIP	-0.413	0.94	-0.751	-0.674	-0.464	1.35	-0.338	-0.262	-0.0513	-1.69	-1.61	-1.4	0.0768	0.287	0.21	2.26e-07	1.15e-11	1.82e-10	6.8e-10	5.87e-08	1.2e-13	2.05e-06	2.95e-05	0.238	7.21e-15	1.3e-14	7.53e-14	0.0869	1.16e-05	0.000226	1.71e-06	2.87e-11	1.07e-09	5.37e-09	2.44e-07	4.92e-13	6.4e-06	0.000106	0.29	5e-14	7e-14	3.87e-13	0.116	9.74e-05	0.000486	FALSE	FALSE	FALSE
P07910	HNRNPC	-0.325	1.26	-0.0153	0.211	0.324	1.59	0.309	0.535	0.648	-1.28	-1.05	-0.94	0.226	0.339	0.113	3.81e-10	1.5e-17	0.435	6.67e-08	3.93e-10	8.27e-19	6.88e-10	7.72e-13	6.96e-14	1.29e-17	1.52e-16	6.39e-16	2.94e-08	2.23e-10	5.29e-05	8.38e-09	1.32e-16	0.485	3e-07	2.64e-09	1.51e-17	4.89e-09	2.62e-11	1.38e-12	2.04e-16	1.38e-15	5.38e-15	1.44e-07	1.69e-08	0.000129	FALSE	TRUE	FALSE
P08579	SNRPB2	-0.106	0.162	0.203	-1.1	0.297	0.268	0.309	-0.994	0.403	0.0412	-1.26	0.135	-1.3	0.0943	1.4	0.0391	0.004	0.000758	6.15e-12	2.44e-05	6.68e-05	1.65e-05	2.17e-11	9.84e-07	0.388	1.11e-12	0.0118	7.42e-13	0.0623	3.09e-13	0.0647	0.00447	0.00136	9.49e-11	5.98e-05	8.58e-05	4.32e-05	4.43e-10	3.25e-06	0.408	4.09e-12	0.0139	1.61e-11	0.122	7.47e-12	FALSE	FALSE	FALSE
P08621	SNRNP70	0.596	1.91	0.831	0.623	0.266	1.32	0.235	0.0275	-0.33	-1.08	-1.29	-1.65	-0.207	-0.565	-0.358	3.93e-13	1.55e-19	6.01e-15	2.23e-13	8.17e-09	1.77e-17	3.55e-08	0.194	5.93e-10	2.13e-16	2.31e-17	1.03e-18	1.51e-07	7.69e-13	2.23e-10	3.46e-11	2.75e-18	1.23e-13	5.79e-12	3.99e-08	2e-16	1.64e-07	0.266	3.97e-09	2.22e-15	2.63e-16	2.49e-17	6.42e-07	1.69e-10	1.99e-09	FALSE	TRUE	FALSE
P09012	SNRPA	0.61	1.04	0.909	0.568	0.342	0.426	0.298	-0.0427	-0.268	-0.128	-0.469	-0.694	-0.341	-0.566	-0.225	4.18e-10	5.88e-13	3.05e-12	1.01e-09	3.84e-07	3.12e-08	1.77e-06	0.257	5.59e-06	0.00368	1.01e-08	8.65e-11	4.03e-07	1.04e-09	3.27e-05	8.84e-09	1.76e-12	2.86e-11	7.6e-09	1.35e-06	5.55e-08	5.63e-06	0.339	1.6e-05	0.00455	2.04e-08	2.65e-10	1.55e-06	5.35e-08	8.24e-05	FALSE	TRUE	FALSE
P09651	HNRNPA1	-0.396	0.843	-0.409	-0.701	-0.166	1.24	-0.0129	-0.304	0.23	-1.25	-1.54	-1.01	-0.291	0.243	0.534	4.95e-09	4.51e-13	3.36e-09	4.56e-12	6.73e-05	3.52e-15	0.659	1.1e-07	2.52e-06	3.09e-15	2.19e-16	4.69e-14	1.82e-07	1.39e-06	1.31e-10	6.93e-08	1.39e-12	1.54e-08	7.38e-11	0.000153	2.08e-14	0.714	7.16e-07	7.71e-06	2.37e-14	1.9e-15	2.54e-13	7.57e-07	1.61e-05	1.27e-09	FALSE	FALSE	FALSE
P14866	HNRNPL	-0.738	-2.13	-0.996	-0.853	-0.654	-1.4	-0.258	-0.115	0.0841	1.14	1.28	1.48	0.143	0.342	0.199	7.1e-14	1.03e-19	1.62e-15	1.15e-14	3.24e-13	2.25e-17	2.91e-08	0.000156	0.00197	2.99e-16	6.67e-17	1.07e-17	1.89e-05	9.97e-10	5.75e-07	8.69e-12	2.08e-18	3.99e-14	4.72e-13	4.43e-12	2.44e-16	1.38e-07	0.000478	0.00362	2.98e-15	6.6e-16	1.54e-16	5.09e-05	5.19e-08	2.1e-06	FALSE	TRUE	FALSE
P26368	U2AF2	0.306	2.2	0.545	0.407	0.431	1.9	0.24	0.102	0.126	-1.66	-1.8	-1.77	-0.138	-0.114	0.0241	4.02e-05	2.68e-15	7.9e-08	2.09e-06	1.11e-06	1.76e-14	0.000367	0.0629	0.0259	9.66e-14	3.53e-14	4.19e-14	0.0163	0.0404	0.637	0.000151	1.29e-14	2.69e-07	6.89e-06	3.52e-06	8.67e-14	0.000768	0.102	0.0388	5.1e-13	1.74e-13	2.31e-13	0.0255	0.0855	0.682	FALSE	TRUE	FALSE
P31943	HNRNPH1	-0.392	-1.37	-0.12	-0.367	0.0635	-0.975	0.272	0.0254	0.456	1.25	1	1.43	-0.247	0.184	0.431	2.64e-08	5.32e-15	0.00286	5.78e-08	0.0745	3.76e-13	1.69e-06	0.451	4.44e-09	1.7e-14	2.72e-13	3e-15	4.85e-06	8.97e-05	8.82e-09	2.77e-07	2.38e-14	0.00464	2.63e-07	0.0998	1.4e-12	5.41e-06	0.542	2.42e-08	1.08e-13	1.13e-12	2.15e-14	1.48e-05	0.00052	4.95e-08	FALSE	TRUE	FALSE
P35637	FUS	-0.117	-1.71	-1.23	-0.699	-1.32	-1.59	-1.11	-0.582	-1.2	0.481	1.01	0.391	0.527	-0.0893	-0.616	0.00422	4.52e-16	2.95e-14	3.33e-11	1.22e-14	1.11e-15	1.04e-13	3.16e-10	3.92e-14	3.24e-09	3.48e-13	3.72e-08	1.06e-09	0.0199	1.57e-10	0.009	2.6e-15	4.92e-13	4.11e-10	2.52e-13	7.39e-15	2.02e-12	4.28e-09	8.48e-13	8.06e-09	1.4e-12	7.93e-08	7.86e-09	0.0482	1.49e-09	FALSE	TRUE	TRUE
P49756	RBM25	0.094	0.202	-0.112	-0.852	0.283	0.108	-0.206	-0.946	0.189	-0.313	-1.05	0.0809	-0.741	0.394	1.13	0.000768	4.28e-07	0.000181	9.95e-15	8.57e-09	0.000247	3.46e-07	2.65e-15	9.07e-07	2.5e-09	6.79e-16	0.00239	5.83e-14	1.52e-10	2.66e-16	0.00199	6.27e-07	0.000357	4.27e-13	4.16e-08	0.000304	1.28e-06	2.94e-13	3.02e-06	6.31e-09	5.09e-15	0.00299	1.95e-12	1.4e-08	2.06e-14	FALSE	FALSE	FALSE
P52298	NCBP2	0.471	3.44	0.768	0.658	0.889	2.97	0.296	0.187	0.418	-2.67	-2.78	-2.55	-0.11	0.121	0.231	8.51e-10	1.19e-20	2.05e-12	1.4e-11	3.26e-13	7.77e-20	2.03e-07	2.88e-05	3.63e-09	2.96e-19	1.77e-19	5.34e-19	0.00261	0.00127	3.17e-06	1.6e-08	3.86e-19	2.03e-11	1.96e-10	4.43e-12	2.38e-18	7.81e-07	0.000104	2.01e-08	1.01e-17	4.97e-18	1.49e-17	0.00474	0.00484	9.88e-06	FALSE	TRUE	FALSE
P52597	HNRNPF	-0.41	-1.36	-0.122	-0.255	-0.00763	-0.946	0.288	0.155	0.402	1.23	1.1	1.35	-0.133	0.115	0.247	3.03e-07	1.48e-13	0.0127	4.57e-05	0.859	1.33e-11	1.38e-05	0.00291	3.75e-07	4.84e-13	2.01e-12	1.59e-13	0.00798	0.0179	6.12e-05	2.22e-06	4.95e-13	0.0187	0.000115	0.884	3.82e-11	3.66e-05	0.00672	1.35e-06	2.24e-12	7.13e-12	7.67e-13	0.0132	0.044	0.000147	FALSE	TRUE	FALSE
P61978	HNRNPK	-0.429	-3.49	-0.746	-0.331	-0.389	-3.06	-0.317	0.0981	0.0401	2.75	3.16	3.1	0.415	0.357	-0.0581	2.55e-10	8.53e-22	2.64e-13	5.93e-09	8.44e-10	4.51e-21	9.93e-09	0.00148	0.124	1.81e-20	3.02e-21	3.82e-21	3.83e-10	2.39e-09	0.0332	6.16e-09	6.26e-20	3.38e-12	3.51e-08	5.15e-09	3.27e-19	5.18e-08	0.00367	0.161	1.41e-18	2.64e-19	3.22e-19	3.3e-09	9.63e-08	0.048	FALSE	TRUE	FALSE
P67809	YBX1	0.0952	2.48	-0.0955	-0.0246	0.0249	2.39	-0.191	-0.12	-0.0703	-2.58	-2.51	-2.46	0.0708	0.12	0.0496	0.000858	1.83e-20	0.000839	0.283	0.277	3.01e-20	1.07e-06	0.00012	0.00721	1.13e-20	1.62e-20	2.08e-20	0.00685	0.000115	0.0424	0.0022	5.21e-19	0.0015	0.339	0.331	1.22e-18	3.6e-06	0.00038	0.0119	1.01e-18	9.09e-19	1.15e-18	0.0115	0.000636	0.0598	FALSE	TRUE	FALSE
Q01130	SRSF2	0.527	1.24	0.555	0.764	0.381	0.715	0.0285	0.237	-0.146	-0.687	-0.478	-0.862	0.209	-0.175	-0.384	2.28e-08	6.24e-13	1.22e-08	2.6e-10	9.41e-07	5.83e-10	0.523	0.000116	0.00512	9.56e-10	7.13e-08	5.94e-11	0.000359	0.00149	8.63e-07	2.44e-07	1.86e-12	4.92e-08	2.37e-09	3.03e-06	1.31e-09	0.586	0.000369	0.00876	2.57e-09	1.3e-07	1.86e-10	0.000775	0.00553	3.03e-06	FALSE	TRUE	FALSE
Q05519	SRSF11	-0.0846	1.93	-0.0197	0.0576	0.16	2.01	0.0649	0.142	0.245	-1.95	-1.87	-1.77	0.0773	0.18	0.103	0.13	2.54e-14	0.713	0.29	0.00914	1.48e-14	0.236	0.0176	0.000447	2.23e-14	3.72e-14	7.57e-14	0.163	0.00446	0.0715	0.183	9.81e-14	0.751	0.346	0.0146	7.42e-14	0.29	0.0333	0.000915	1.35e-13	1.82e-13	3.88e-13	0.206	0.0136	0.0967	FALSE	TRUE	FALSE
Q08170	SRSF4	0.0838	-0.632	0.0685	0.676	-0.0652	-0.716	-0.0154	0.592	-0.149	0.701	1.31	0.567	0.607	-0.134	-0.741	0.224	3.31e-07	0.316	1.56e-07	0.339	7.96e-08	0.819	6.94e-07	0.0412	1.02e-07	5.69e-11	1.11e-06	5.22e-07	0.063	5.38e-08	0.293	4.89e-07	0.364	6.56e-07	0.397	1.36e-07	0.851	3.64e-06	0.0594	2.11e-07	1.62e-10	2e-06	1.95e-06	0.123	2.48e-07	FALSE	FALSE	FALSE
Q13151	HNRNPA0	-0.431	1.09	-0.398	-0.835	-0.313	1.53	0.033	-0.404	0.119	-1.49	-1.93	-1.41	-0.436	0.0857	0.522	3.53e-05	1.04e-09	7.56e-05	2.63e-08	0.000633	1.75e-11	0.644	6.71e-05	0.112	2.29e-11	9.37e-13	4.77e-11	3.15e-05	0.24	5.07e-06	0.000135	2e-09	0.000157	1.31e-07	0.00123	4.95e-11	0.699	0.000225	0.147	7.83e-11	3.5e-12	1.52e-10	8.16e-05	0.351	1.5e-05	FALSE	TRUE	FALSE
Q13243	SRSF5	0.327	0.901	0.52	1.1	0.442	0.574	0.193	0.775	0.115	-0.381	0.201	-0.459	0.582	-0.078	-0.66	2.79e-07	1.34e-12	1.19e-09	1.07e-13	8.38e-09	3.58e-10	7.04e-05	8.74e-12	0.00453	4.84e-08	4.71e-05	5.35e-09	3e-10	0.0367	6.39e-11	2.07e-06	3.8e-12	5.96e-09	3.05e-12	4.07e-08	8.3e-10	0.000164	2.19e-10	0.00784	1.03e-07	6.34e-05	1.27e-08	2.71e-09	0.0797	6.81e-10	FALSE	FALSE	FALSE
Q14103	HNRNPD	-0.755	-0.625	-0.806	-1.08	-0.481	0.131	-0.0511	-0.321	0.274	-0.182	-0.451	0.144	-0.27	0.326	0.595	4.8e-11	4.94e-10	2.13e-11	5.82e-13	1.16e-08	0.00408	0.195	1.19e-06	6.36e-06	0.000331	2.43e-08	0.00207	7.59e-06	1.02e-06	8.83e-10	1.55e-09	9.91e-10	1.64e-10	1.27e-11	5.51e-08	0.00466	0.245	5.82e-06	1.79e-05	0.000452	4.71e-08	0.0026	2.22e-05	1.21e-05	6.52e-09	FALSE	FALSE	FALSE
Q14498	RBM39	0.138	2.39	0.39	0.389	0.29	2.26	0.252	0.25	0.151	-2	-2.01	-2.1	-0.00164	-0.101	-0.099	6.03e-05	6.97e-20	5.6e-10	5.89e-10	2.01e-08	1.48e-19	1.02e-07	1.11e-07	2.54e-05	6.67e-19	6.6e-19	3.58e-19	0.945	0.000962	0.00109	0.000214	1.53e-18	3e-09	4.81e-09	9.15e-08	3.82e-18	4.26e-07	7.16e-07	6.44e-05	1.96e-17	1.38e-17	1.06e-17	0.954	0.0038	0.00205	FALSE	TRUE	FALSE
Q15365	PCBP1	-0.121	-2.27	-0.109	0.191	0.367	-2.15	0.0121	0.312	0.489	2.16	2.46	2.64	0.3	0.477	0.176	0.00258	7.85e-18	0.00523	5.78e-05	5.17e-08	1.57e-17	0.716	3.34e-07	1.75e-09	1.47e-17	2.81e-18	1.17e-18	5.2e-07	2.37e-09	0.000123	0.00588	7.38e-17	0.00813	0.000143	2.17e-07	1.81e-16	0.764	1.89e-06	1.05e-08	2.29e-16	4.7e-17	2.74e-17	1.95e-06	9.63e-08	0.000277	FALSE	TRUE	FALSE
Q15366	PCBP2	-0.239	-2.6	-0.297	0.192	-0.0824	-2.36	-0.0578	0.431	0.157	2.3	2.79	2.51	0.488	0.214	-0.274	0.000916	1.33e-15	0.000147	0.00449	0.163	4.52e-15	0.318	3.69e-06	0.0149	6.19e-15	5.42e-16	2.01e-15	9.42e-07	0.00208	0.000296	0.00233	6.92e-15	0.000293	0.00784	0.204	2.57e-14	0.38	1.61e-05	0.0233	4.37e-14	4.2e-15	1.53e-14	3.36e-06	0.00726	0.00062	FALSE	TRUE	FALSE
Q15427	SF3B4	-0.0672	0.779	0.141	-1	0.358	0.846	0.208	-0.933	0.425	-0.638	-1.78	-0.421	-1.14	0.217	1.36	0.0651	7.89e-12	0.00104	3.46e-13	9.54e-08	2.81e-12	3.31e-05	8.27e-13	1.27e-08	9.31e-11	2.42e-16	1.44e-08	6.6e-14	2.15e-05	7.34e-15	0.101	2.02e-11	0.00183	8e-12	3.81e-07	9e-12	8.17e-05	2.75e-11	6.3e-08	2.9e-10	2.08e-15	3.22e-08	2.19e-12	0.000162	3.05e-13	FALSE	FALSE	FALSE
Q15637	SF1	-0.0951	-3.13	-0.903	-0.768	-0.671	-3.03	-0.808	-0.673	-0.576	2.23	2.36	2.46	0.134	0.232	0.0976	0.0162	2.74e-19	1.82e-12	1.36e-11	7.28e-11	4.06e-19	7.3e-12	6.96e-11	4.75e-10	2.06e-17	9.79e-18	5.86e-18	0.00186	1.51e-05	0.0141	0.0298	4.52e-18	1.84e-11	1.9e-10	5.67e-10	8.68e-18	8.61e-11	1.16e-09	3.29e-09	3.01e-16	1.25e-16	9.64e-17	0.00346	0.000121	0.0218	FALSE	TRUE	FALSE
Q16630	CPSF6	0.0104	0.0695	-0.255	-1.17	-0.175	0.0591	-0.265	-1.18	-0.186	-0.324	-1.24	-0.245	-0.918	0.0794	0.998	0.835	0.181	0.000188	6.09e-12	0.00353	0.251	0.000131	5.46e-12	0.00237	1.91e-05	2.97e-12	0.000266	1.27e-10	0.13	4.55e-11	0.872	0.188	0.000369	9.45e-11	0.00608	0.261	0.000291	1.43e-10	0.00429	2.97e-05	1.03e-11	0.000366	1.31e-09	0.217	5.17e-10	FALSE	FALSE	FALSE
Q6NZY4	ZCCHC8	0.0734	1.43	0.341	0.0351	0.582	1.35	0.268	-0.0383	0.509	-1.08	-1.39	-0.843	-0.306	0.241	0.547	0.124	1.55e-13	4.07e-06	0.445	9.57e-09	3e-13	4.74e-05	0.406	4.68e-08	4.76e-12	2.11e-13	1.07e-10	1.26e-05	0.000129	2e-08	0.176	5.16e-13	1.03e-05	0.505	4.6e-08	1.14e-12	0.000113	0.496	2.04e-07	1.82e-11	8.92e-13	3.24e-10	3.51e-05	0.0007	1.01e-07	FALSE	TRUE	FALSE
Q86V81	ALYREF	0.058	1.78	0.0392	-0.048	0.0288	1.72	-0.0188	-0.106	-0.0292	-1.74	-1.83	-1.75	-0.0872	-0.0104	0.0768	0.466	9.24e-12	0.62	0.545	0.715	1.39e-11	0.812	0.194	0.712	1.22e-11	6.64e-12	1.13e-11	0.28	0.895	0.338	0.545	2.34e-11	0.663	0.604	0.755	3.99e-11	0.845	0.266	0.751	4.37e-11	2.17e-11	3.96e-11	0.331	0.927	0.39	FALSE	TRUE	FALSE
Q8N684	CPSF7	-0.0955	-1.55	-1.11	-1.53	-1.02	-1.45	-1.01	-1.44	-0.929	0.44	0.0138	0.524	-0.426	0.0843	0.511	0.0337	1.48e-14	9.93e-13	1.66e-14	2.67e-12	3.31e-14	3.06e-12	3.73e-14	9.05e-12	7.62e-08	0.736	9.72e-09	1.1e-07	0.0563	1.34e-08	0.057	5.96e-14	1.07e-11	6.29e-13	2.9e-11	1.51e-13	4.01e-11	2.01e-12	1.02e-10	1.58e-07	0.746	2.23e-08	4.84e-07	0.112	7.16e-08	FALSE	TRUE	TRUE
Q8WXA9	SREK1	0.109	1.59	0.256	0.208	0.332	1.48	0.148	0.099	0.224	-1.34	-1.39	-1.26	-0.0486	0.0761	0.125	0.0342	5.39e-14	9.41e-05	0.000592	7.21e-06	1.31e-13	0.00682	0.0502	0.000316	4.87e-13	3.11e-13	1.02e-12	0.308	0.121	0.0176	0.0576	1.92e-13	0.000193	0.00121	1.94e-05	5.29e-13	0.0116	0.084	0.000665	2.25e-12	1.27e-12	4.23e-12	0.361	0.204	0.0267	FALSE	TRUE	FALSE
Q92945	KHSRP	-0.442	-4.41	-0.00554	-0.404	0.572	-3.97	0.436	0.0385	1.01	4.4	4.01	4.98	-0.398	0.577	0.975	2.93e-08	9.63e-21	0.884	8.45e-08	1.35e-09	3.69e-20	3.39e-08	0.32	1.15e-12	9.79e-21	3.26e-20	2.04e-21	9.91e-08	1.2e-09	1.86e-12	3.02e-07	3.24e-19	0.903	3.73e-07	7.86e-09	1.4e-18	1.57e-07	0.406	1.61e-11	8.96e-19	1.43e-18	2.04e-19	4.39e-07	5.78e-08	3.52e-11	FALSE	TRUE	FALSE
Q9BTD8	RBM42	0.142	1.42	0.109	-0.4	0.3	1.28	-0.0326	-0.542	0.158	-1.31	-1.82	-1.12	-0.51	0.191	0.701	0.0163	9.85e-13	0.0533	3.37e-06	6.18e-05	3.68e-12	0.536	1.16e-07	0.00885	2.69e-12	4.33e-14	1.92e-11	2.35e-07	0.00265	5.7e-09	0.03	2.85e-12	0.0708	1.07e-05	0.000141	1.15e-11	0.598	7.45e-07	0.0145	1.06e-11	2.1e-13	6.47e-11	9.57e-07	0.00886	3.38e-08	FALSE	TRUE	FALSE
Q9UHX1	PUF60	0.175	1.54	0.424	0.388	0.51	1.37	0.249	0.213	0.335	-1.12	-1.15	-1.03	-0.0359	0.086	0.122	5.85e-06	1.92e-17	2.08e-10	6.13e-10	2.13e-11	8.86e-17	1.2e-07	6.96e-07	3.64e-09	1.13e-15	7.59e-16	3.12e-15	0.153	0.0031	0.000197	2.77e-05	1.63e-16	1.2e-09	4.94e-09	1.85e-10	8.02e-16	4.86e-07	3.65e-06	2.01e-08	9.49e-15	5.58e-15	2.22e-14	0.195	0.0101	0.00043	FALSE	TRUE	FALSE
Q9Y3B4	SF3B6	-0.0363	0.633	0.315	-0.871	0.286	0.669	0.351	-0.834	0.322	-0.318	-1.5	-0.347	-1.19	-0.029	1.16	0.472	1.11e-08	2.5e-05	2.35e-10	6.38e-05	5.69e-09	8.25e-06	3.95e-10	1.98e-05	2.25e-05	2.63e-13	9.31e-06	5.15e-12	0.565	7.01e-12	0.55	1.9e-08	5.6e-05	2.17e-09	0.000145	1.12e-08	2.27e-05	5.18e-09	5.12e-05	3.47e-05	1.1e-12	1.5e-05	8.29e-11	0.668	1.05e-10	FALSE	FALSE	FALSE
Q9Y580	RBM7	-0.0934	1.54	0.253	-0.0622	0.516	1.63	0.346	0.0312	0.609	-1.28	-1.6	-1.02	-0.315	0.263	0.578	0.225	3e-11	0.00438	0.411	9.84e-06	1.44e-11	0.000415	0.677	1.69e-06	2.75e-10	1.84e-11	4.42e-09	0.000895	0.00341	2.98e-06	0.294	7.07e-11	0.0069	0.47	2.59e-05	4.13e-11	0.000863	0.75	5.34e-06	7.97e-10	5.64e-11	1.06e-08	0.00178	0.0109	9.36e-06	FALSE	TRUE	FALSE
O15042	U2SURP	-0.405	0.456	-0.0941	-0.00719	-0.117	0.861	0.311	0.398	0.288	-0.55	-0.464	-0.574	0.0869	-0.0233	-0.11	3.24e-10	7.5e-11	0.00152	0.764	0.000253	2.68e-14	7.92e-09	4.04e-10	1.99e-08	7.35e-12	6.19e-11	4.38e-12	0.0027	0.338	0.000434	7.47e-09	1.67e-10	0.0026	0.804	0.000526	1.24e-13	4.2e-08	5.27e-09	9.42e-08	2.71e-11	1.74e-10	1.63e-11	0.00489	0.455	0.000878	FALSE	FALSE	FALSE
O95104	SCAF4	-0.11	-0.118	-0.123	-0.164	0.0305	-0.00827	-0.0133	-0.0539	0.14	-0.00504	-0.0456	0.149	-0.0406	0.154	0.194	0.00832	0.00532	0.00405	0.000479	0.402	0.818	0.711	0.15	0.00161	0.888	0.218	0.00105	0.27	0.000804	0.000107	0.0163	0.0059	0.00643	0.000993	0.461	0.821	0.76	0.215	0.00301	0.895	0.229	0.00135	0.321	0.00329	0.000244	FALSE	FALSE	FALSE
P22626	HNRNPA2B1	-0.532	-0.683	-0.653	-0.802	-0.48	-0.151	-0.121	-0.27	0.0517	0.0301	-0.119	0.203	-0.149	0.173	0.322	6e-11	2.67e-12	4.69e-12	3.57e-13	2.11e-10	8.65e-05	0.000604	1.96e-07	0.076	0.282	0.000694	4.59e-06	9.82e-05	2.38e-05	2.57e-08	1.82e-09	7.21e-12	4.2e-11	8.22e-12	1.5e-09	0.00011	0.00121	1.18e-06	0.103	0.3	0.000848	7.69e-06	0.000233	0.000177	1.27e-07	FALSE	FALSE	FALSE
P52272	HNRNPM	0.0112	-0.239	-0.356	0.347	-0.205	-0.25	-0.367	0.336	-0.216	-0.117	0.586	0.0343	0.703	0.152	-0.552	0.444	4.33e-10	3.09e-12	4.25e-12	2.83e-09	2.47e-10	2.1e-12	6.38e-12	1.49e-09	1.73e-06	5.92e-15	0.031	5.89e-16	9.74e-08	1.27e-14	0.523	8.74e-10	2.89e-11	6.93e-11	1.53e-08	5.91e-10	2.84e-11	1.62e-10	9.1e-09	3.05e-06	3.45e-14	0.0355	4.03e-14	1.74e-06	4.85e-13	FALSE	FALSE	FALSE
P84103	SRSF3	0.0934	0.71	0.172	0.303	0.183	0.617	0.0783	0.209	0.0893	-0.538	-0.407	-0.527	0.131	0.0111	-0.12	0.0222	6.23e-11	0.000379	1.44e-06	0.000221	3.53e-10	0.0485	6.33e-05	0.0274	1.84e-09	5.07e-08	2.36e-09	0.003	0.762	0.00539	0.0392	1.41e-10	0.000712	4.94e-06	0.000463	8.19e-10	0.0698	0.000213	0.0409	4.73e-09	9.44e-08	5.92e-09	0.0054	0.832	0.00892	FALSE	FALSE	FALSE
P98175	RBM10	-0.357	-0.385	-0.498	-0.359	-0.52	-0.0287	-0.141	-0.00261	-0.163	-0.112	0.0261	-0.134	0.138	-0.022	-0.16	1.2e-08	4.76e-09	2.14e-10	1.1e-08	1.26e-10	0.32	0.00023	0.927	6.08e-05	0.00147	0.365	0.00035	0.00027	0.443	7.09e-05	1.43e-07	8.47e-09	1.24e-09	6.04e-08	9.32e-10	0.331	0.000491	0.946	0.000145	0.00189	0.378	0.000475	0.000594	0.558	0.000168	FALSE	FALSE	FALSE
Q07955	SRSF1	0.0191	0.5	0.123	0.3	0.0998	0.481	0.104	0.281	0.0808	-0.376	-0.2	-0.4	0.177	-0.0236	-0.2	0.528	4.02e-10	0.00109	1.73e-07	0.00492	6.47e-10	0.00366	3.64e-07	0.0169	1.23e-08	1.42e-05	5.95e-09	4.84e-05	0.436	1.4e-05	0.603	8.16e-10	0.00191	7.14e-07	0.00822	1.45e-09	0.00653	2.04e-06	0.0262	2.83e-08	2.02e-05	1.4e-08	0.000121	0.552	3.82e-05	FALSE	FALSE	FALSE
Q13247	SRSF6	0.15	0.145	0.148	0.668	0.148	-0.0052	-0.00229	0.518	-0.00176	0.00291	0.523	0.00344	0.52	0.000532	-0.519	9.7e-06	1.39e-05	1.14e-05	1.98e-13	1.09e-05	0.811	0.916	4.8e-12	0.935	0.893	4.24e-12	0.874	4.54e-12	0.98	4.6e-12	4.32e-05	1.8e-05	2.68e-05	5.21e-12	2.85e-05	0.815	0.933	1.26e-10	0.944	0.9	1.43e-11	0.883	7.56e-11	0.987	7.44e-11	FALSE	FALSE	FALSE
Q15020	SART3	0.124	-0.0867	0.395	0.171	0.111	-0.211	0.271	0.0471	-0.0129	0.482	0.258	0.198	-0.224	-0.284	-0.06	0.00324	0.0254	4.22e-08	0.000263	0.00662	3.86e-05	2.9e-06	0.192	0.713	4.01e-09	4.96e-06	7.06e-05	2.1e-05	1.76e-06	0.104	0.00715	0.0273	1.52e-07	0.000577	0.0109	5.04e-05	8.76e-06	0.265	0.751	9.87e-09	7.35e-06	0.000103	5.62e-05	1.96e-05	0.135	FALSE	FALSE	FALSE
Q16629	SRSF7	0.0697	0.609	0.0546	0.676	0.0811	0.539	-0.0151	0.606	0.0114	-0.554	0.067	-0.528	0.621	0.0265	-0.595	0.0706	3.39e-10	0.146	9.41e-11	0.0393	1.49e-09	0.677	3.58e-10	0.751	1.06e-09	0.0808	1.93e-09	2.65e-10	0.467	4.51e-10	0.108	6.93e-10	0.181	9.83e-10	0.056	3.17e-09	0.729	4.77e-09	0.786	2.83e-09	0.087	4.89e-09	2.43e-09	0.579	3.62e-09	FALSE	FALSE	FALSE
Q96I25	RBM17	-0.348	0.447	0.0205	0.3	0.051	0.795	0.369	0.648	0.399	-0.427	-0.148	-0.396	0.279	0.0305	-0.249	2.67e-08	1.34e-09	0.493	1.52e-07	0.103	1.09e-12	1.36e-08	1.41e-11	5.28e-09	2.36e-09	0.000225	5.75e-09	3.4e-07	0.313	1.23e-06	2.79e-07	2.55e-09	0.543	6.42e-07	0.135	3.76e-12	6.92e-08	3.15e-10	2.83e-08	6e-09	0.000286	1.36e-08	1.33e-06	0.432	4.18e-06	FALSE	FALSE	FALSE
Q9BXP5	SRRT	0.464	0.609	0.637	0.509	0.512	0.145	0.173	0.0451	0.0477	0.028	-0.0996	-0.097	-0.128	-0.125	0.00265	7.69e-12	2.59e-13	1.47e-13	2.42e-12	2.27e-12	6.81e-06	1.02e-06	0.041	0.032	0.182	0.000248	0.000313	2.45e-05	3.01e-05	0.896	3.56e-10	8.35e-13	2.03e-12	4.26e-11	2.53e-11	9.46e-06	3.44e-06	0.0702	0.0472	0.197	0.000314	0.000426	6.47e-05	0.000213	0.91	FALSE	FALSE	FALSE
O14979	HNRNPDL	-0.695	-0.21	-0.717	-1.11	-0.519	0.485	-0.0221	-0.418	0.176	-0.507	-0.902	-0.309	-0.396	0.198	0.594	5.95e-10	0.000268	4.06e-10	1.76e-12	1.98e-08	4.41e-08	0.609	2.43e-07	0.00115	2.62e-08	2.38e-11	6.67e-06	4.49e-07	0.000444	3.97e-09	1.19e-08	0.000319	2.23e-09	3.28e-11	9.03e-08	7.75e-08	0.667	1.42e-06	0.00218	5.74e-08	7.2e-11	1.1e-05	1.7e-06	0.002	2.46e-08	FALSE	FALSE	FALSE
O15047	SETD1A	-0.458	0.111	0.121	-0.884	0.11	0.569	0.579	-0.425	0.568	0.0104	-0.994	-0.00107	-1	-0.0115	0.993	0.000865	0.316	0.274	1.64e-06	0.32	0.000138	0.000117	0.00153	0.00014	0.923	4.47e-07	0.992	3.97e-07	0.915	4.52e-07	0.00221	0.325	0.319	5.58e-06	0.377	0.000172	0.000262	0.00379	0.000313	0.928	7.43e-07	0.993	1.53e-06	0.941	1.7e-06	FALSE	FALSE	FALSE
O15056	SYNJ2	0.136	-1.38	-0.387	-0.127	-0.231	-1.51	-0.523	-0.263	-0.367	0.988	1.25	1.14	0.26	0.156	-0.104	0.441	6.77e-06	0.0438	0.508	0.201	9.5e-07	0.00564	0.15	0.0346	4.92e-05	1.66e-05	1.32e-05	0.154	0.326	0.552	0.52	8.94e-06	0.0587	0.567	0.246	1.45e-06	0.00971	0.216	0.0508	7.27e-05	2.34e-05	2.1e-05	0.196	0.444	0.604	FALSE	TRUE	FALSE
O75382	TRIM3	NA	NA	NA	NA	NA	-3.29	-0.366	NA	-0.0458	2.92	NA	3.24	NA	0.321	NA	NA	NA	NA	NA	NA	2.2e-05	0.213	NA	0.874	6.16e-06	NA	6.42e-06	NA	0.174	NA	NA	NA	NA	NA	NA	2.93e-05	0.265	NA	0.893	1.02e-05	NA	1.06e-05	NA	0.273	NA	FALSE	FALSE	FALSE
O75494	SRSF10	-0.113	1.19	0.173	0.439	0.224	1.3	0.285	0.551	0.337	-1.02	-0.75	-0.965	0.266	0.0519	-0.214	0.00113	2.69e-15	2.56e-05	6.8e-10	1.66e-06	8.57e-16	1.14e-07	4.12e-11	1.62e-08	1.95e-14	8.85e-13	3.77e-14	2.5e-07	0.0769	2.75e-06	0.00281	1.29e-14	5.73e-05	5.37e-09	5.03e-06	5.86e-15	4.64e-07	7.57e-10	7.75e-08	1.2e-13	3.33e-12	2.09e-13	1.01e-06	0.143	8.74e-06	FALSE	TRUE	FALSE
O75534	CSDE1	-0.668	-2.62	-0.455	-0.649	-0.213	-1.95	0.213	0.0195	0.455	2.16	1.97	2.4	-0.193	0.242	0.436	6.75e-13	2.14e-20	7.96e-11	9.78e-13	6.51e-07	9.06e-19	6.57e-07	0.421	8e-11	2.43e-19	7.98e-19	6.29e-20	1.89e-06	1.51e-07	1.37e-10	5.14e-11	5.79e-19	5.2e-10	1.97e-11	2.17e-06	1.64e-17	2.3e-06	0.511	6.68e-10	8.86e-18	1.6e-17	2.71e-18	6.3e-06	2.49e-06	1.32e-09	FALSE	TRUE	FALSE
O94886	TMEM63A	NA	NA	NA	NA	NA	-3.31	-2.43	-0.109	-1.78	0.876	3.2	1.52	2.32	0.649	-1.67	NA	NA	NA	NA	NA	0.000495	0.00354	0.863	0.0182	0.0757	5.08e-05	0.00698	0.000519	0.171	0.00414	NA	NA	NA	NA	NA	0.000597	0.00633	0.898	0.028	0.0842	6.82e-05	0.00839	0.00108	0.269	0.00699	FALSE	FALSE	FALSE
O94992	HEXIM1	-0.438	-1.02	-0.0132	-0.491	0.343	-0.582	0.424	-0.0533	0.781	1.01	0.528	1.36	-0.478	0.357	0.834	1.73e-05	1.22e-09	0.843	5.29e-06	0.000174	8.49e-07	2.35e-05	0.432	2.92e-08	1.42e-09	2.42e-06	3.46e-11	7.04e-06	0.000124	1.34e-08	7.29e-05	2.32e-09	0.869	1.62e-05	0.000372	1.3e-06	5.95e-05	0.523	1.33e-07	3.72e-09	3.7e-06	1.13e-10	2.07e-05	0.000677	7.17e-08	FALSE	TRUE	FALSE
O95218	ZRANB2	0.172	-0.534	0.716	0.782	0.342	-0.706	0.544	0.61	0.17	1.25	1.32	0.876	0.066	-0.374	-0.44	0.00545	1.39e-07	4.46e-09	1.54e-09	1.74e-05	5.29e-09	1.12e-07	2.96e-08	0.00569	4.78e-12	2.52e-12	3.85e-10	0.222	7.03e-06	1.23e-06	0.0113	2.14e-07	1.98e-08	1.08e-08	4.38e-05	1.05e-08	4.61e-07	2.17e-07	0.00964	1.83e-11	8.81e-12	1.08e-09	0.271	6.3e-05	4.18e-06	FALSE	FALSE	FALSE
O95319	CELF2	-0.386	-3.13	-0.509	-0.0322	-0.262	-2.74	-0.123	0.354	0.124	2.62	3.09	2.86	0.477	0.247	-0.23	5.65e-05	9.85e-16	3.46e-06	0.631	0.00156	5.22e-15	0.0836	0.000127	0.08	9.31e-15	1.12e-15	2.98e-15	6.89e-06	0.00238	0.00394	0.000203	5.27e-15	8.91e-06	0.684	0.00286	2.89e-14	0.114	0.0004	0.108	6.29e-14	7.91e-15	2.15e-14	2.03e-05	0.00817	0.00667	FALSE	TRUE	FALSE
O95453	PARN	-0.336	-1.78	-0.721	-0.46	-0.349	-1.44	-0.386	-0.124	-0.013	1.06	1.32	1.43	0.261	0.373	0.111	0.142	8.67e-06	0.00668	0.0746	0.162	2e-05	0.0681	0.568	0.952	0.000246	0.000105	5.45e-05	0.242	0.107	0.64	0.198	1.13e-05	0.0102	0.102	0.203	2.67e-05	0.0944	0.652	0.958	0.000339	0.000137	8.06e-05	0.292	0.186	0.685	FALSE	TRUE	FALSE
O95639	CPSF4	0.0454	-0.321	0.231	-0.845	0.0311	-0.366	0.186	-0.89	-0.0142	0.552	-0.524	0.352	-1.08	-0.2	0.876	0.331	8.38e-06	0.0002	1.14e-10	0.5	2.07e-06	0.00122	6.01e-11	0.756	1.96e-08	3.62e-08	3.16e-06	5.73e-12	0.000682	7.33e-11	0.407	1.1e-05	0.000391	1.15e-09	0.558	3.04e-06	0.00233	1.03e-09	0.79	4.38e-08	6.86e-08	5.4e-06	8.99e-11	0.00289	7.55e-10	FALSE	FALSE	FALSE
O95758	PTBP3	-1.08	-1.75	-1.56	-1	-1.14	-0.666	-0.478	0.0837	-0.0565	0.188	0.75	0.609	0.561	0.421	-0.14	3.23e-15	7.49e-18	3.18e-17	8.93e-15	1.7e-15	1.48e-12	9.18e-11	0.00525	0.0414	4.71e-06	3.35e-13	4.47e-12	1.24e-11	4.3e-10	8.91e-05	9.08e-13	7.11e-17	1.36e-15	3.98e-13	4.35e-14	4.93e-12	7.96e-10	0.0113	0.0597	7.87e-06	1.35e-12	1.65e-11	1.75e-10	2.74e-08	0.000206	TRUE	TRUE	TRUE
P05198	EIF2S1	-0.496	-2.71	-1.19	-0.711	-1.04	-2.21	-0.697	-0.215	-0.548	1.51	2	1.66	0.482	0.149	-0.333	7.32e-11	3.79e-20	1.23e-15	8.33e-13	6.61e-15	4.96e-19	1.07e-12	1.41e-06	2.14e-11	6.05e-17	1.82e-18	1.84e-17	1.05e-10	6.18e-05	9.18e-09	2.13e-09	9.33e-19	3.1e-14	1.73e-11	1.46e-13	1e-17	1.54e-11	6.79e-06	2.17e-10	7.38e-16	3.26e-17	2.43e-16	1.11e-09	0.000385	5.11e-08	FALSE	TRUE	TRUE
P05455	SSB	0.102	1.96	0.777	0.324	0.212	1.86	0.675	0.222	0.11	-1.18	-1.64	-1.75	-0.453	-0.565	-0.112	0.16	6.15e-13	5.01e-08	0.000415	0.00869	1.2e-12	2.53e-07	0.00658	0.133	3.22e-10	5.87e-12	2.57e-12	1.83e-05	1.82e-06	0.126	0.22	1.84e-12	1.78e-07	0.000874	0.0139	4.09e-12	9.55e-07	0.0138	0.171	9.22e-10	1.94e-11	9.89e-12	4.96e-05	2.02e-05	0.161	FALSE	TRUE	FALSE
P0DN76	U2AF1L5	0.217	1.37	0.354	0.35	0.239	1.16	0.137	0.133	0.0218	-1.02	-1.02	-1.13	-0.0045	-0.115	-0.111	3.39e-05	1.14e-14	1.82e-07	2.1e-07	1.31e-05	9.95e-14	0.00179	0.00228	0.543	4.86e-13	4.6e-13	1.26e-13	0.899	0.00582	0.00744	0.000131	4.72e-14	5.74e-07	8.51e-07	3.35e-05	4.17e-13	0.00334	0.00542	0.601	2.25e-12	1.81e-12	6.23e-13	0.918	0.017	0.012	FALSE	TRUE	FALSE
P16989	YBX3	-0.212	2.56	-0.129	-0.198	0.157	2.77	0.0825	0.0137	0.369	-2.69	-2.76	-2.4	-0.0688	0.287	0.355	0.0053	7.87e-15	0.0616	0.00802	0.0275	2.88e-15	0.214	0.831	6.25e-05	4.22e-15	3.07e-15	1.75e-14	0.296	0.000587	8.93e-05	0.011	3.38e-14	0.0807	0.0133	0.0404	1.74e-14	0.267	0.872	0.000148	3.11e-14	1.92e-14	1.04e-13	0.349	0.00254	0.000206	FALSE	TRUE	FALSE
P18615	NELFE	-0.944	0.747	-0.171	-0.00449	0.103	1.69	0.773	0.939	1.05	-0.919	-0.752	-0.645	0.167	0.274	0.107	5.53e-10	9.24e-09	0.0104	0.938	0.0948	4e-13	6.2e-09	5.87e-10	1.56e-10	7.71e-10	8.6e-09	5.28e-08	0.0121	0.000363	0.0826	1.12e-08	1.6e-08	0.0155	0.95	0.124	1.48e-12	3.36e-08	7.24e-09	1.22e-09	2.1e-09	1.76e-08	1.11e-07	0.0193	0.00167	0.11	FALSE	FALSE	FALSE
P19338	NCL	0.616	2.36	0.378	0.548	0.109	1.74	-0.238	-0.0683	-0.507	-1.98	-1.81	-2.25	0.169	-0.269	-0.439	2.39e-11	1.07e-18	9.1e-09	1.02e-10	0.00235	5e-17	1.84e-06	0.0342	2.64e-10	9.87e-18	3.07e-17	1.96e-18	5.88e-05	4.69e-07	1.54e-09	8.71e-10	1.35e-17	3.76e-08	1.06e-09	0.00416	4.83e-16	5.81e-06	0.0601	1.95e-09	1.66e-16	3.34e-16	4.05e-17	0.000145	6.44e-06	1.08e-08	FALSE	TRUE	FALSE
P21399	ACO1	-0.109	-4.56	0.557	-0.284	-1.13	-4.45	0.667	-0.175	-1.02	5.11	4.27	3.43	-0.842	-1.68	-0.843	0.823	7.08e-07	0.266	0.562	0.0568	9.13e-07	0.188	0.72	0.0811	2.08e-07	1.39e-06	3.63e-05	0.104	0.00847	0.141	0.862	1.01e-06	0.31	0.62	0.078	1.39e-06	0.237	0.785	0.11	4.13e-07	2.19e-06	5.47e-05	0.137	0.0235	0.178	FALSE	TRUE	FALSE
P23246	SFPQ	-0.57	-4.36	-5.52	-2.62	-5.21	-3.79	-4.95	-2.05	-4.64	-1.16	1.74	-0.848	2.9	0.311	-2.59	2.69e-10	2e-21	1e-22	1.28e-18	2.09e-22	1.19e-20	4e-22	2.88e-17	9.14e-22	3.89e-14	2.35e-16	1.97e-12	3.59e-19	3.5e-07	1.52e-18	6.41e-09	1.06e-19	3.81e-20	8.77e-16	7.17e-20	7.19e-19	1.48e-19	1.07e-14	3.36e-19	2.24e-13	2.03e-15	7.76e-12	1.14e-16	5.11e-06	4.12e-16	FALSE	TRUE	TRUE
P23588	EIF4B	-0.434	-3.61	-0.564	-0.528	-0.458	-3.17	-0.131	-0.0948	-0.0244	3.04	3.08	3.15	0.0359	0.106	0.0704	4.75e-06	3.08e-17	2.65e-07	5.54e-07	2.65e-06	1.56e-16	0.0409	0.123	0.678	2.66e-16	2.3e-16	1.72e-16	0.543	0.0876	0.243	2.32e-05	2.47e-16	8.06e-07	2.07e-06	7.73e-06	1.31e-15	0.0597	0.182	0.72	2.69e-15	1.99e-15	1.76e-15	0.595	0.159	0.291	FALSE	TRUE	FALSE
P26599	PTBP1	-0.798	-3.2	-1.48	-0.951	-1.26	-2.4	-0.677	-0.153	-0.461	1.73	2.25	1.94	0.524	0.217	-0.307	3.02e-09	8.9e-17	1.56e-12	3.58e-10	1.13e-11	3.35e-15	2.13e-08	0.0163	1.71e-06	2.17e-13	7.69e-15	4.9e-14	4.1e-07	0.00186	0.000102	4.7e-08	6.36e-16	1.6e-11	3.12e-09	1.06e-10	2e-14	1.03e-07	0.0311	5.37e-06	1.06e-12	4.4e-14	2.62e-13	1.57e-06	0.00661	0.000234	FALSE	TRUE	TRUE
P29558	RBMS1	-0.075	0.77	-0.583	-0.911	-0.733	0.845	-0.508	-0.836	-0.658	-1.35	-1.68	-1.5	-0.329	-0.151	0.178	0.111	2.65e-10	7.76e-09	3.33e-11	4.83e-10	8.45e-11	3.95e-08	9.63e-11	1.79e-09	2.41e-13	1.56e-14	6.38e-14	5.06e-06	0.0045	0.00139	0.16	5.48e-10	3.26e-08	4.11e-10	3.15e-09	2.18e-10	1.8e-07	1.52e-09	1.07e-08	1.16e-12	8.28e-14	3.34e-13	1.54e-05	0.0137	0.00256	FALSE	FALSE	FALSE
P31483	TIA1	-0.275	-3.62	-0.0659	-0.334	0.18	-3.35	0.209	-0.0596	0.454	3.56	3.29	3.8	-0.269	0.245	0.514	0.00298	8.78e-16	0.397	0.000686	0.0331	2.38e-15	0.0158	0.442	4.5e-05	1.11e-15	2.99e-15	4.76e-16	0.0035	0.00628	1.33e-05	0.00666	4.74e-15	0.447	0.00138	0.0477	1.48e-14	0.025	0.533	0.000109	9.36e-15	1.87e-14	4.17e-15	0.00621	0.0182	3.64e-05	FALSE	TRUE	FALSE
P33240	CSTF2	-0.261	-2.53	-0.572	-0.494	-0.432	-2.27	-0.31	-0.233	-0.17	1.96	2.03	2.09	0.0773	0.14	0.0625	0.00093	6.03e-15	4.55e-07	2.25e-06	9.39e-06	2.39e-14	0.000225	0.00222	0.0155	1.53e-13	9.37e-14	6.4e-14	0.228	0.0397	0.324	0.00236	2.66e-14	1.34e-06	7.35e-06	2.49e-05	1.12e-13	0.000482	0.0053	0.0243	7.69e-13	4.26e-13	3.35e-13	0.277	0.0845	0.375	FALSE	TRUE	FALSE
P42696	RBM34	0.358	4.41	0.478	0.95	0.508	4.05	0.121	0.592	0.15	-3.93	-3.46	-3.9	0.471	0.0291	-0.442	0.000474	9.59e-17	3.39e-05	1.85e-08	1.89e-05	2.8e-16	0.141	3.84e-06	0.0736	4.1e-16	2.06e-15	4.51e-16	3.91e-05	0.711	7.19e-05	0.00131	6.75e-16	7.41e-05	9.64e-08	4.72e-05	2.15e-15	0.183	1.66e-05	0.101	3.92e-15	1.36e-14	3.99e-15	9.95e-05	0.791	0.000171	FALSE	TRUE	FALSE
P43243	MATR3	-0.507	-1.93	-0.405	-0.223	-0.379	-1.42	0.102	0.283	0.128	1.53	1.71	1.55	0.182	0.0263	-0.155	4.05e-11	1.95e-18	6.34e-10	6.81e-07	1.43e-09	9.25e-17	0.00128	4.54e-08	0.000191	3.86e-17	9.28e-18	3.11e-17	6.4e-06	0.307	3.13e-05	1.34e-09	2.26e-17	3.35e-09	2.49e-06	8.3e-09	8.28e-16	0.00245	3.18e-07	0.000417	5.12e-16	1.2e-16	3.83e-16	1.9e-05	0.425	7.96e-05	FALSE	TRUE	FALSE
P47974	ZFP36L2	NA	NA	NA	NA	NA	NA	NA	NA	NA	3.15	3.35	3.22	0.206	0.0729	-0.133	NA	NA	NA	NA	NA	NA	NA	NA	NA	0.000649	0.000516	0.000254	0.602	0.829	0.695	NA	NA	NA	NA	NA	NA	NA	NA	NA	0.000862	0.000637	0.00035	0.65	0.877	0.733	FALSE	FALSE	FALSE
P51114	FXR1	-0.26	-0.965	-1.83	-0.592	-1.82	-0.705	-1.57	-0.332	-1.56	-0.867	0.373	-0.853	1.24	0.0145	-1.23	0.00042	2.77e-10	9.46e-14	9.46e-08	1.05e-13	1.23e-08	6.47e-13	4.65e-05	7.27e-13	1.02e-09	1.46e-05	1.25e-09	1.25e-11	0.797	1.44e-11	0.00117	5.71e-10	1.37e-12	4.14e-07	1.65e-12	2.3e-08	1e-11	0.000161	1.08e-11	2.72e-09	2.08e-05	3.25e-09	1.75e-10	0.855	1.91e-10	FALSE	FALSE	TRUE
P51116	FXR2	-0.176	-0.277	-0.873	-0.162	-1.01	-0.101	-0.696	0.0139	-0.833	-0.596	0.115	-0.732	0.71	-0.137	-0.847	0.000237	2.77e-06	3.37e-12	0.000477	5.45e-13	0.0128	5.54e-11	0.697	5.99e-12	3.79e-10	0.00599	2.98e-11	4.34e-11	0.00182	4.88e-12	0.000709	3.78e-06	3.11e-11	0.000989	7.18e-12	0.0142	5.04e-10	0.767	7.04e-11	1.08e-09	0.00686	9.79e-11	5.16e-10	0.00651	7.61e-11	FALSE	FALSE	FALSE
P55795	HNRNPH2	-0.175	-1.34	0.298	-0.437	0.166	-1.16	0.473	-0.261	0.341	1.64	0.902	1.5	-0.734	-0.132	0.603	0.11	8.91e-09	0.012	0.000921	0.127	4.65e-08	0.000482	0.0236	0.00533	7.92e-10	8.44e-07	2.19e-09	7.65e-06	0.218	5.51e-05	0.158	1.54e-08	0.0177	0.0018	0.163	8.14e-08	0.000989	0.0431	0.00907	2.16e-09	1.37e-06	5.53e-09	2.23e-05	0.327	0.000133	FALSE	TRUE	FALSE
P57721	PCBP3	NA	NA	NA	NA	NA	NA	NA	NA	NA	3.93	3.22	NA	-0.714	NA	NA	NA	NA	NA	NA	NA	NA	NA	NA	NA	0.00033	0.000525	NA	0.217	NA	NA	NA	NA	NA	NA	NA	NA	NA	NA	NA	0.000451	0.000647	NA	0.266	NA	NA	FALSE	FALSE	FALSE
P57723	PCBP4	0.0469	-1.98	0.132	0.059	0.204	-2.03	0.085	0.0121	0.158	2.12	2.04	2.19	-0.0729	0.0726	0.146	0.74	3.15e-09	0.358	0.677	0.163	2.38e-09	0.55	0.932	0.275	1.45e-09	2.21e-09	9.62e-10	0.607	0.608	0.312	0.794	5.72e-09	0.407	0.727	0.205	4.93e-09	0.611	0.95	0.33	3.78e-09	4.91e-09	2.56e-09	0.653	0.705	0.363	FALSE	TRUE	FALSE
P62487	POLR2G	0.109	-0.625	0.442	-0.66	0.291	-0.734	0.333	-0.769	0.182	1.07	-0.0351	0.916	-1.1	-0.152	0.951	0.115	3.06e-07	1.28e-05	1.65e-07	0.000614	4.84e-08	0.000191	2.8e-08	0.0146	5.5e-10	0.595	3.51e-09	3.7e-10	0.0353	2.23e-09	0.165	4.55e-07	2.98e-05	6.87e-07	0.0012	8.44e-08	0.000412	2.07e-07	0.0229	1.53e-09	0.607	8.57e-09	3.21e-09	0.0775	1.48e-08	FALSE	FALSE	FALSE
P62633	CNBP	-0.12	-0.741	-0.408	-1.05	0.513	-0.621	-0.288	-0.934	0.633	0.333	-0.313	1.25	-0.646	0.921	1.57	0.0777	3.09e-08	2.16e-05	4.54e-10	1.98e-06	2.38e-07	0.000526	1.97e-09	1.9e-07	0.000149	0.000262	5.33e-11	1.53e-07	2.32e-09	3.36e-12	0.118	5.04e-08	4.91e-05	3.84e-09	5.85e-06	3.87e-07	0.00107	2.12e-08	7.33e-07	0.00021	0.000332	1.68e-10	6.49e-07	9.63e-08	5.8e-11	FALSE	FALSE	FALSE
P62995	TRA2B	0.0331	1.08	0.255	0.751	0.191	1.05	0.222	0.718	0.158	-0.825	-0.329	-0.889	0.496	-0.0637	-0.56	0.256	1.36e-14	5.78e-07	1.3e-12	1.26e-05	2.01e-14	2.65e-06	2.28e-12	8.05e-05	4.04e-13	3.17e-08	1.59e-13	2.23e-10	0.0397	5.04e-11	0.328	5.54e-14	1.66e-06	2.55e-11	3.23e-05	9.69e-14	8.11e-06	6.58e-11	0.000187	1.88e-12	6.03e-08	7.67e-13	2.1e-09	0.0846	5.61e-10	FALSE	TRUE	FALSE
P78332	RBM6	-0.515	-1.32	-1.07	-0.682	-1.1	-0.808	-0.557	-0.167	-0.587	0.251	0.641	0.221	0.39	-0.0301	-0.42	2.14e-07	2.38e-12	3.26e-11	8.08e-09	2.31e-11	1.04e-09	8.65e-08	0.00655	4.7e-08	0.000318	1.67e-08	0.000909	4.5e-06	0.569	2.03e-06	1.64e-06	6.47e-12	2.36e-10	4.63e-08	1.98e-10	2.27e-09	3.67e-07	0.0137	2.04e-07	0.000435	3.29e-08	0.00118	1.38e-05	0.671	6.65e-06	FALSE	TRUE	TRUE
P78344	EIF4G2	-0.228	-2.77	-0.184	-0.0307	-0.21	-2.55	0.0434	0.197	0.0173	2.59	2.74	2.56	0.153	-0.0262	-0.18	3.31e-05	2.72e-18	0.000237	0.416	7.07e-05	8.08e-18	0.255	0.00013	0.644	6.52e-18	3.14e-18	7.41e-18	0.00107	0.486	0.000294	0.000128	2.96e-17	0.000457	0.475	0.00016	1.01e-16	0.311	0.000407	0.691	1.21e-16	5.08e-17	1.17e-16	0.00209	0.597	0.000616	FALSE	TRUE	FALSE
P98179	RBM3	-0.735	-1.78	-1.36	-1.11	-1.2	-1.04	-0.63	-0.38	-0.462	0.411	0.661	0.579	0.25	0.168	-0.0821	1.12e-08	2.14e-13	5.76e-12	7.07e-11	2.94e-11	1.64e-10	6.75e-08	1.69e-05	2.18e-06	7.65e-06	3.89e-08	1.8e-07	0.000767	0.0115	0.173	1.34e-07	6.98e-13	5.04e-11	7.7e-10	2.49e-10	4.03e-10	2.94e-07	6.42e-05	6.77e-06	1.25e-05	7.34e-08	3.56e-07	0.00155	0.0305	0.215	FALSE	TRUE	TRUE
Q00341	HDLBP	-0.0482	-2.39	0.147	0.0743	0.119	-2.34	0.195	0.122	0.167	2.53	2.46	2.5	-0.0728	-0.0283	0.0445	0.00347	5.87e-23	7.88e-08	0.000107	8.85e-07	7.61e-23	2.76e-09	6.33e-07	1.79e-08	2.74e-23	3.98e-23	3.17e-23	0.000129	0.0561	0.00581	0.00759	8.26e-21	2.69e-07	0.000253	2.87e-06	1.87e-20	1.66e-08	3.36e-06	8.47e-08	1.54e-20	1.32e-20	1.12e-20	0.0003	0.112	0.00956	FALSE	TRUE	FALSE
Q01085	TIAL1	-0.411	-3.69	-0.695	-0.577	-0.409	-3.28	-0.284	-0.166	0.00167	3	3.12	3.28	0.117	0.285	0.168	5.03e-08	6.49e-20	9.03e-11	8.69e-10	5.27e-08	2.9e-19	3.18e-06	0.000524	0.964	9.14e-19	5.61e-19	2.88e-19	0.00658	2.99e-06	0.000482	4.71e-07	1.46e-18	5.77e-10	6.7e-09	2.21e-07	6.59e-18	9.52e-06	0.00145	0.968	2.48e-17	1.22e-17	8.95e-18	0.011	3.11e-05	0.000969	FALSE	TRUE	FALSE
Q01844	EWSR1	-0.109	-1.83	-1.3	-0.182	-1.45	-1.72	-1.19	-0.0735	-1.34	0.529	1.64	0.374	1.11	-0.155	-1.27	0.0536	3.96e-14	2.9e-12	0.00358	7.06e-13	8.59e-14	8.66e-12	0.175	1.87e-12	1.49e-07	1.49e-13	6.74e-06	1.92e-11	0.00984	3.78e-12	0.0849	1.45e-13	2.76e-11	0.00638	9.03e-12	3.65e-13	9.96e-11	0.245	2.49e-11	3e-07	6.48e-13	1.11e-05	2.53e-10	0.0267	6.38e-11	FALSE	TRUE	TRUE
Q07666	KHDRBS1	-0.374	-2.64	-1.21	-0.469	-1.03	-2.27	-0.833	-0.095	-0.658	1.44	2.17	1.61	0.738	0.175	-0.563	2.54e-08	6.52e-19	1.34e-14	1.7e-09	9.68e-14	4.51e-18	1.42e-12	0.00929	2.68e-11	1.48e-15	7.76e-18	3.45e-16	6.45e-12	8.81e-05	1.84e-10	2.68e-07	8.87e-18	2.45e-13	1.17e-08	1.56e-12	6.24e-17	1.99e-11	0.0188	2.62e-10	1.22e-14	1.05e-16	3.17e-15	9.91e-11	0.000514	1.68e-09	FALSE	TRUE	TRUE
Q12849	GRSF1	0.177	1.26	0.188	0.167	0.269	1.09	0.0103	-0.0102	0.0912	-1.08	-1.1	-0.996	-0.0205	0.0809	0.101	0.399	3.39e-05	0.373	0.426	0.209	0.000141	0.96	0.961	0.661	0.000154	0.00013	0.000306	0.921	0.697	0.626	0.476	4.29e-05	0.423	0.485	0.256	0.000176	0.969	0.974	0.706	0.000216	0.000168	0.000417	0.935	0.778	0.672	FALSE	TRUE	FALSE
Q12905	ILF2	-0.376	1.41	-0.832	-0.624	-0.578	1.79	-0.456	-0.248	-0.202	-2.24	-2.03	-1.99	0.208	0.255	0.0462	4.73e-09	3.35e-16	2.61e-13	9.56e-12	2.49e-11	1.68e-17	4.52e-10	5.9e-07	5.52e-06	9.37e-19	3.23e-18	4.32e-18	3.96e-06	4.43e-07	0.112	6.76e-08	2e-15	3.35e-12	1.38e-10	2.12e-10	1.9e-16	3.33e-09	3.16e-06	1.58e-05	2.5e-17	5.2e-17	7.56e-17	1.23e-05	6.12e-06	0.145	FALSE	TRUE	FALSE
Q13049	TRIM32	0.56	-1.86	0.35	1.04	0.163	-2.42	-0.209	0.484	-0.397	2.22	2.91	2.03	0.693	-0.188	-0.881	0.00303	2.24e-08	0.04	1.39e-05	0.308	9.66e-10	0.196	0.00772	0.0228	2.88e-09	1.04e-10	8.3e-09	0.000603	0.243	7.33e-05	0.00675	3.71e-08	0.0541	3.9e-05	0.363	2.12e-09	0.246	0.0159	0.0344	7.21e-09	2.82e-10	1.92e-08	0.00124	0.354	0.000173	FALSE	TRUE	FALSE
Q13148	TARDBP	-0.537	-1.77	-0.873	-0.419	-0.364	-1.24	-0.336	0.118	0.173	0.902	1.36	1.41	0.454	0.509	0.0547	3.55e-10	1.12e-16	8.57e-13	7.14e-09	3.72e-08	1.07e-14	9.5e-08	0.0024	0.000106	5.75e-13	3.37e-15	2.05e-15	2.71e-09	6.85e-10	0.104	8.06e-09	7.67e-16	9.49e-12	4.13e-08	1.62e-07	5.5e-14	3.99e-07	0.00568	0.000243	2.62e-12	2.08e-14	1.55e-14	1.77e-08	3.93e-08	0.136	FALSE	TRUE	FALSE
Q13242	SRSF9	-0.0989	0.97	0.159	0.274	0.18	1.07	0.257	0.373	0.279	-0.812	-0.696	-0.79	0.115	0.0219	-0.0934	0.049	2.45e-11	0.00413	4.69e-05	0.00167	7.33e-12	8.41e-05	1.97e-06	3.86e-05	2.21e-10	1.43e-09	3.09e-10	0.0251	0.638	0.061	0.0785	5.84e-11	0.00653	0.000117	0.00304	2.17e-11	0.000192	9.26e-06	9.49e-05	6.51e-10	3.27e-09	8.78e-10	0.0378	0.73	0.0838	FALSE	FALSE	FALSE
Q13283	G3BP1	-0.478	-1.82	-0.978	-0.216	-0.967	-1.34	-0.5	0.262	-0.489	0.841	1.6	0.851	0.762	0.0107	-0.752	3.19e-12	1.49e-19	3.88e-16	5.14e-08	4.46e-16	7.13e-18	1.82e-12	5e-09	2.38e-12	2.63e-15	7.37e-19	2.24e-15	9.04e-15	0.584	1.08e-14	1.76e-10	2.69e-18	1.1e-14	2.38e-07	1.35e-14	8.99e-17	2.5e-11	4.67e-08	3.11e-11	2.05e-14	1.5e-17	1.67e-14	3.91e-13	0.684	4.31e-13	FALSE	TRUE	FALSE
Q13595	TRA2A	0.16	1.12	0.448	1.11	0.275	0.963	0.287	0.946	0.115	-0.676	-0.017	-0.848	0.659	-0.172	-0.831	0.00324	2.87e-12	1.95e-07	3.47e-12	3.47e-05	1.94e-11	2.28e-05	2.43e-11	0.0224	1.5e-09	0.707	9.38e-11	2.04e-09	0.00195	1.2e-10	0.00715	7.7e-12	6.09e-07	5.89e-11	8.31e-05	5.46e-11	5.79e-05	4.9e-10	0.0339	3.9e-09	0.717	2.86e-10	1.38e-08	0.00685	1.17e-09	FALSE	TRUE	FALSE
Q13601	KRR1	0.398	3	0.564	0.542	0.444	2.6	0.167	0.144	0.0463	-2.43	-2.45	-2.55	-0.0228	-0.121	-0.0977	3.49e-05	1.29e-15	8.95e-07	1.41e-06	1.16e-05	7.77e-15	0.022	0.0428	0.482	1.79e-14	1.6e-14	9.75e-15	0.727	0.0827	0.151	0.000134	6.76e-15	2.51e-06	4.84e-06	3e-05	4.11e-14	0.0339	0.0728	0.542	1.12e-13	8.45e-14	6.05e-14	0.765	0.152	0.191	FALSE	TRUE	FALSE
Q14011	CIRBP	-0.552	-0.761	-0.12	-0.268	0.402	-0.21	0.432	0.284	0.953	0.641	0.494	1.16	-0.148	0.521	0.669	3.74e-05	1.32e-06	0.204	0.0106	0.000638	0.0361	0.00035	0.00748	1.05e-07	8.19e-06	0.000107	1.02e-08	0.123	6.41e-05	5.25e-06	0.000143	1.85e-06	0.245	0.0173	0.00124	0.0391	0.000736	0.0155	4.23e-07	1.33e-05	0.00014	2.34e-08	0.159	0.000396	1.55e-05	FALSE	FALSE	FALSE
Q14562	DHX8	0.229	1.19	0.433	0.22	0.33	0.961	0.203	-0.00905	0.101	-0.758	-0.97	-0.86	-0.212	-0.102	0.11	0.000134	8.48e-13	1.82e-07	0.000192	3.59e-06	1.23e-11	0.000388	0.835	0.0343	2.3e-10	1.09e-11	4.85e-11	0.000267	0.0325	0.023	0.000432	2.49e-12	5.75e-07	0.000433	1.02e-05	3.53e-11	0.00081	0.876	0.0504	6.76e-10	3.46e-11	1.54e-10	0.000588	0.0723	0.0342	FALSE	TRUE	FALSE
Q14671	PUM1	-0.288	-1.54	-0.058	0.0426	-0.243	-1.25	0.23	0.331	0.0446	1.48	1.58	1.3	0.101	-0.185	-0.286	6.18e-05	2.02e-13	0.26	0.403	0.000284	2.7e-12	0.000462	1.6e-05	0.382	3.28e-13	1.44e-13	1.74e-12	0.0621	0.00243	6.6e-05	0.000219	6.62e-13	0.304	0.463	0.000586	8.67e-12	0.00095	6.1e-05	0.442	1.55e-12	6.29e-13	6.93e-12	0.086	0.00832	0.000158	FALSE	TRUE	FALSE
Q14690	PDCD11	0.0819	1.6	-0.112	0.11	-0.334	1.52	-0.194	0.0284	-0.416	-1.71	-1.49	-1.94	0.222	-0.222	-0.445	0.00549	1.91e-17	0.000562	0.000634	5.88e-09	3.71e-17	2.95e-06	0.268	4.15e-10	8.09e-18	4.71e-17	1.72e-18	6.62e-07	6.64e-07	1.85e-10	0.0114	1.62e-16	0.00103	0.00128	2.98e-08	3.7e-16	8.91e-06	0.351	2.92e-09	1.42e-16	4.93e-16	3.73e-17	2.43e-06	8.52e-06	1.69e-09	FALSE	TRUE	FALSE
Q14966	ZNF638	-0.0852	1.74	-0.00496	1.35	0.143	1.83	0.0802	1.43	0.229	-1.75	-0.393	-1.6	1.35	0.148	-1.21	0.529	8.39e-09	0.971	1.66e-07	0.296	4.74e-09	0.553	8.21e-08	0.107	8.11e-09	0.0108	2.32e-08	1.59e-07	0.281	5.92e-07	0.604	1.46e-08	0.975	6.91e-07	0.351	9.45e-09	0.615	5.47e-07	0.14	1.92e-08	0.0122	5.06e-08	6.74e-07	0.396	2.15e-06	FALSE	TRUE	FALSE
Q15056	EIF4H	-0.433	-4.72	-0.257	-0.677	0.43	-4.29	0.175	-0.244	0.863	4.46	4.04	5.15	-0.42	0.688	1.11	5.07e-05	1.94e-17	0.00365	4.66e-07	5.35e-05	6.56e-17	0.0311	0.00514	2.86e-08	3.94e-17	1.38e-16	6.41e-18	6.79e-05	3.91e-07	1.46e-09	0.000185	1.64e-16	0.00582	1.77e-06	0.000124	6.1e-16	0.0463	0.0111	1.3e-07	5.15e-16	1.27e-15	1.04e-16	0.000165	5.65e-06	1.03e-08	FALSE	TRUE	FALSE
Q15233	NONO	-0.345	-4.06	-5.1	-2.19	-4.83	-3.71	-4.76	-1.85	-4.48	-1.04	1.87	-0.768	2.91	0.276	-2.64	3.78e-08	1.54e-21	8.41e-23	3.9e-18	1.71e-22	4.77e-21	2.05e-22	3.42e-17	4.37e-22	4.59e-14	2.92e-17	2.16e-12	1.05e-19	4.81e-07	3.7e-19	3.75e-07	9.15e-20	3.61e-20	1.34e-15	6.5e-20	3.38e-19	1.08e-19	1.14e-14	1.79e-19	2.57e-13	3.2e-16	8.43e-12	3.98e-17	6.59e-06	1.4e-16	FALSE	TRUE	TRUE
Q15717	ELAVL1	-0.281	-1.05	-0.303	-0.44	-0.23	-0.772	-0.0224	-0.159	0.0511	0.749	0.613	0.823	-0.137	0.0735	0.21	9.09e-07	1.05e-13	3.86e-07	5.06e-09	7.84e-06	5.15e-12	0.494	0.000264	0.134	7.43e-12	9.01e-11	2.31e-12	0.00093	0.0387	1.94e-05	5.56e-06	3.63e-13	1.15e-06	3.05e-08	2.09e-05	1.58e-11	0.559	0.000774	0.172	2.73e-11	2.47e-10	8.97e-12	0.00184	0.0827	5.14e-05	FALSE	TRUE	FALSE
Q16560	SNRNP35	0.0824	3.2	0.489	0.33	0.275	3.12	0.407	0.247	0.192	-2.72	-2.87	-2.93	-0.159	-0.214	-0.055	0.0692	2.25e-18	3.26e-08	2.78e-06	1.86e-05	3.14e-18	2.74e-07	5.2e-05	0.000495	1.84e-17	8.94e-18	7.03e-18	0.00212	0.000194	0.208	0.107	2.55e-17	1.2e-07	8.96e-06	4.66e-05	4.51e-17	1.03e-06	0.000177	0.001	2.79e-16	1.17e-16	1.12e-16	0.0039	0.001	0.254	FALSE	TRUE	FALSE
Q4G0J3	LARP7	0.49	1.39	0.647	0.676	0.46	0.902	0.157	0.186	-0.0299	-0.745	-0.716	-0.932	0.0289	-0.187	-0.216	2.46e-09	5.67e-15	8.26e-11	4.82e-11	5.23e-09	1.33e-12	0.000442	9.99e-05	0.389	1.44e-11	2.36e-11	8.83e-13	0.404	9.52e-05	2.39e-05	3.98e-08	2.51e-14	5.38e-10	5.56e-10	2.68e-08	4.47e-12	0.000915	0.000321	0.449	5.12e-11	7.12e-11	3.72e-12	0.46	0.000544	6.23e-05	FALSE	TRUE	FALSE
Q5PRF9	SAMD4B	-0.33	-2.46	-0.72	0.14	-0.791	-2.13	-0.391	0.469	-0.461	1.74	2.6	1.67	0.86	-0.0704	-0.93	0.311	4.96e-06	0.0397	0.662	0.0264	6.84e-06	0.187	0.119	0.124	4.74e-05	9.03e-07	6.92e-05	0.00966	0.805	0.00607	0.386	6.61e-06	0.0538	0.715	0.0389	9.49e-06	0.236	0.176	0.161	7.03e-05	1.46e-06	0.000101	0.0158	0.859	0.00996	FALSE	TRUE	FALSE
Q5T200	ZC3H13	-0.0897	1.5	0.21	0.149	-0.0517	1.59	0.3	0.239	0.038	-1.29	-1.35	-1.55	-0.061	-0.262	-0.201	0.000729	3.95e-18	1.46e-07	6.34e-06	0.0246	1.89e-18	2.21e-09	3.32e-08	0.0845	2.68e-17	1.49e-17	2.57e-18	0.0103	1.12e-08	2.45e-07	0.0019	4.13e-17	4.71e-07	1.92e-05	0.0365	2.92e-17	1.36e-08	2.38e-07	0.114	3.76e-16	1.79e-16	5.04e-17	0.0168	3.25e-07	9.81e-07	FALSE	TRUE	FALSE
Q5VZF2	MBNL2	NA	NA	NA	NA	NA	-2.99	-0.143	0.0952	-0.212	2.85	3.09	2.78	0.239	-0.0691	-0.308	NA	NA	NA	NA	NA	1.21e-09	0.0652	0.313	0.0216	7.97e-10	4.73e-09	1.98e-09	0.0242	0.325	0.0104	NA	NA	NA	NA	NA	2.61e-09	0.091	0.399	0.0327	2.17e-09	1.01e-08	5.02e-09	0.0365	0.443	0.0163	FALSE	FALSE	FALSE
Q6P158	DHX57	0.216	2.25	0.487	0.323	0.344	2.03	0.271	0.108	0.128	-1.76	-1.92	-1.9	-0.163	-0.143	0.0206	0.000276	3.61e-16	5.89e-08	5.57e-06	2.89e-06	1.29e-15	3.33e-05	0.0281	0.0115	7.9e-15	2.58e-15	2.95e-15	0.00246	0.00604	0.643	0.000813	2.14e-15	2.06e-07	1.7e-05	8.33e-06	8.48e-15	8.21e-05	0.0504	0.0183	5.42e-14	1.64e-14	2.13e-14	0.00448	0.0176	0.687	FALSE	TRUE	FALSE
Q6PKG0	LARP1	0.374	3.16	0.669	0.365	0.557	2.78	0.295	-0.00913	0.182	-2.49	-2.79	-2.6	-0.304	-0.112	0.192	1.23e-09	2.81e-21	9.47e-13	1.66e-09	9.35e-12	1.4e-20	2.17e-08	0.712	4.74e-06	5.8e-20	1.34e-20	3.31e-20	1.52e-08	0.000487	2.82e-06	2.17e-08	1.34e-19	1.04e-11	1.15e-08	8.9e-11	7.8e-19	1.05e-07	0.778	1.38e-05	3.17e-18	8.16e-19	1.62e-18	7.97e-08	0.00216	8.94e-06	FALSE	TRUE	FALSE
Q6ZN04	MEX3B	-0.75	-1.56	-0.61	-0.91	-0.708	-0.811	0.14	-0.16	0.0423	0.951	0.651	0.853	-0.3	-0.0977	0.202	2.3e-05	6.67e-09	0.000163	3.13e-06	4.08e-05	1.05e-05	0.248	0.191	0.721	1.96e-06	9.08e-05	6.21e-06	0.0227	0.414	0.105	9.39e-05	1.17e-08	0.000325	9.98e-06	9.65e-05	1.44e-05	0.304	0.263	0.759	3.44e-06	0.000119	1.02e-05	0.0345	0.53	0.136	FALSE	TRUE	FALSE
Q71RC2	LARP4	0.215	1.15	0.329	0.433	0.32	0.934	0.115	0.218	0.105	-0.819	-0.715	-0.829	0.104	-0.00968	-0.113	6.6e-07	8.24e-16	4.61e-09	1.66e-10	6.58e-09	1.13e-14	0.000344	5.46e-07	0.000714	5.88e-14	3.23e-13	5.07e-14	0.000785	0.69	0.000377	4.26e-06	4.48e-15	2.04e-08	1.58e-09	3.3e-08	5.77e-14	0.000723	2.93e-06	0.00141	3.21e-13	1.31e-12	2.7e-13	0.00158	0.773	0.000773	FALSE	TRUE	FALSE
Q7KZ85	SUPT6H	-0.0186	-1.54	0.62	0.517	0.219	-1.52	0.639	0.535	0.237	2.16	2.06	1.76	-0.104	-0.402	-0.298	0.628	6.55e-15	5.51e-10	5.01e-09	6.33e-05	7.64e-15	3.84e-10	3.28e-09	2.87e-05	9.05e-17	1.69e-16	1.22e-15	0.0163	9.69e-08	2.7e-06	0.696	2.87e-14	2.96e-09	3.03e-08	0.000144	4.05e-14	2.87e-09	3.25e-08	7.23e-05	1.06e-15	1.52e-15	9.74e-15	0.0254	1.74e-06	8.62e-06	FALSE	TRUE	FALSE
Q7Z739	YTHDF3	0.0517	-1.93	-0.864	-0.124	-0.811	-1.98	-0.915	-0.176	-0.863	1.06	1.8	1.11	0.739	0.0526	-0.687	0.156	1.28e-16	3.13e-12	0.00318	6.86e-12	9.16e-17	1.52e-12	0.000206	3.17e-12	2.34e-13	2.98e-16	1.28e-13	2.17e-11	0.15	5.41e-11	0.215	8.63e-16	2.91e-11	0.00573	6.81e-11	8.22e-16	2.11e-11	0.000618	3.98e-11	1.14e-12	2.49e-15	6.28e-13	2.82e-10	0.242	5.86e-10	FALSE	TRUE	FALSE
Q86VM9	ZC3H18	0.188	1.1	0.356	0.8	0.259	0.91	0.168	0.612	0.0714	-0.741	-0.298	-0.838	0.444	-0.0968	-0.54	4.67e-05	4.65e-14	4.69e-08	2.47e-12	1.69e-06	4.92e-13	0.000131	6.87e-11	0.0396	6.35e-12	3.64e-07	1.37e-12	3.46e-09	0.00854	3.16e-10	0.000173	1.68e-13	1.68e-07	4.32e-11	5.1e-06	1.8e-12	0.000291	1.16e-09	0.0574	2.38e-11	6.11e-07	5.56e-12	2.2e-08	0.0237	2.67e-09	FALSE	TRUE	FALSE
Q86XN8	MEX3D	0.534	-1.96	0.234	0.569	-0.0065	-2.5	-0.299	0.0349	-0.54	2.2	2.53	1.96	0.334	-0.241	-0.575	0.496	0.0314	0.792	0.469	0.993	0.00434	0.698	0.956	0.404	0.0205	0.00407	0.0127	0.666	0.755	0.376	0.572	0.0337	0.823	0.529	0.995	0.00495	0.747	0.97	0.464	0.0239	0.00472	0.015	0.707	0.826	0.428	FALSE	FALSE	FALSE
Q8IUH3	RBM45	-0.613	1.51	-0.973	-1.56	-0.736	2.12	-0.361	-0.944	-0.123	-2.49	-3.07	-2.25	-0.583	0.238	0.821	8.85e-10	1.15e-14	2.91e-12	7.98e-15	9.39e-11	1.56e-16	4.44e-07	4.26e-12	0.00705	2.14e-17	1.47e-18	7.64e-17	1.6e-09	3.64e-05	2.43e-11	1.64e-08	4.77e-14	2.76e-11	3.75e-13	7.12e-10	1.31e-15	1.61e-06	1.15e-10	0.0117	3.07e-16	2.7e-17	8.5e-16	1.13e-08	0.000248	2.96e-10	FALSE	TRUE	FALSE
Q8IWZ3	ANKHD1	-0.297	-1.06	0.122	0.405	-0.0206	-0.759	0.419	0.702	0.276	1.18	1.46	1.04	0.283	-0.143	-0.426	0.0151	2.21e-07	0.268	0.00216	0.848	8.08e-06	0.00169	1.81e-05	0.0219	6.26e-08	4.95e-09	2.76e-07	0.0195	0.2	0.0015	0.0281	3.33e-07	0.313	0.00401	0.876	1.11e-05	0.00317	6.82e-05	0.0331	1.31e-07	1.05e-08	5.35e-07	0.0299	0.306	0.00274	FALSE	TRUE	FALSE
Q8IY67	RAVER1	NA	NA	NA	NA	NA	-2.71	-0.279	0.0862	-0.21	2.43	2.79	2.5	0.365	0.0692	-0.296	NA	NA	NA	NA	NA	1.04e-05	0.442	0.81	0.561	2.77e-05	7.74e-06	2.16e-05	0.319	0.847	0.416	NA	NA	NA	NA	NA	1.42e-05	0.505	0.856	0.618	4.23e-05	1.13e-05	3.34e-05	0.373	0.893	0.469	FALSE	FALSE	FALSE
Q8IZ69	TRMT2A	-0.0759	0.646	-0.0834	-0.626	-0.0531	0.722	-0.00755	-0.55	0.0228	-0.729	-1.27	-0.699	-0.543	0.0304	0.573	0.0153	6.22e-12	0.00901	9.2e-12	0.0726	1.56e-12	0.785	4.57e-11	0.415	1.37e-12	1.24e-15	2.33e-12	5.42e-11	0.283	2.76e-11	0.0284	1.61e-11	0.0136	1.35e-10	0.0976	5.19e-12	0.823	8.31e-10	0.476	5.77e-12	8.65e-15	9.01e-12	6.33e-10	0.399	3.34e-10	FALSE	FALSE	FALSE
Q8N5A5	ZGPAT	0.252	1.27	0.383	-0.433	0.331	1.02	0.132	-0.685	0.0791	-0.886	-1.7	-0.939	-0.817	-0.0526	0.764	0.232	2.89e-05	0.0788	0.0504	0.124	0.000227	0.523	0.00474	0.7	0.000727	1.35e-06	0.000454	0.00138	0.797	0.00225	0.302	3.67e-05	0.102	0.0708	0.159	0.00028	0.586	0.0104	0.74	0.00096	2.14e-06	0.00061	0.00264	0.855	0.00397	FALSE	TRUE	FALSE
Q8N5C6	SRBD1	-0.0428	2.02	-0.255	-0.129	-0.101	2.07	-0.212	-0.0866	-0.0586	-2.28	-2.15	-2.13	0.125	0.153	0.0281	0.303	4.62e-16	2.66e-05	0.00656	0.0249	3.54e-16	0.000152	0.0494	0.166	1.03e-16	2.11e-16	2.49e-16	0.00802	0.00211	0.494	0.378	2.65e-15	5.92e-05	0.0111	0.037	2.63e-15	0.000334	0.0828	0.21	1.17e-15	1.85e-15	2.4e-15	0.0133	0.00736	0.548	FALSE	TRUE	FALSE
Q8NC51	SERBP1	0.16	1.73	0.107	0.136	-0.0275	1.57	-0.053	-0.0237	-0.187	-1.63	-1.6	-1.76	0.0293	-0.135	-0.164	2.39e-07	3.38e-20	1.82e-05	1.42e-06	0.112	1.16e-19	0.00607	0.166	3.83e-08	7.6e-20	9.57e-20	2.77e-20	0.0927	1.65e-06	1.82e-07	1.8e-06	8.53e-19	4.16e-05	4.89e-06	0.146	3.18e-18	0.0104	0.234	1.69e-07	3.84e-18	3.25e-18	1.49e-18	0.124	1.86e-05	7.47e-07	FALSE	TRUE	FALSE
Q8NDT2	RBM15B	0.0166	1.5	0.156	0.0922	0.0674	1.48	0.14	0.0756	0.0508	-1.34	-1.41	-1.43	-0.0642	-0.089	-0.0248	0.456	8.89e-18	7.5e-06	0.000965	0.00837	1.02e-17	2.35e-05	0.00406	0.0357	3.6e-17	1.99e-17	1.59e-17	0.0111	0.00127	0.272	0.535	8.2e-17	1.83e-05	0.00188	0.0135	1.24e-16	5.96e-05	0.00901	0.0522	4.82e-16	2.31e-16	2.17e-16	0.0179	0.00485	0.321	FALSE	TRUE	FALSE
Q8NDV7	TNRC6A	-0.209	0.567	-0.0127	-0.635	-0.0544	0.777	0.197	-0.425	0.155	-0.58	-1.2	-0.622	-0.622	-0.0416	0.58	0.341	0.0322	0.952	0.0443	0.797	0.00926	0.369	0.138	0.473	0.0297	0.0032	0.023	0.0474	0.844	0.0592	0.417	0.0345	0.96	0.0632	0.829	0.0103	0.43	0.201	0.532	0.0342	0.00374	0.0265	0.0676	0.89	0.0815	FALSE	FALSE	FALSE
Q8TAT6	NPLOC4	-0.247	-3.72	-0.213	-0.183	-0.24	-3.48	0.0343	0.0638	0.00766	3.51	3.54	3.49	0.0294	-0.0267	-0.0561	0.0586	2.05e-13	0.0974	0.148	0.0657	4.85e-13	0.778	0.601	0.95	4.29e-13	3.87e-13	4.72e-13	0.809	0.826	0.645	0.0919	6.7e-13	0.124	0.188	0.0893	1.78e-12	0.817	0.683	0.956	1.99e-12	1.55e-12	2.1e-12	0.838	0.876	0.689	FALSE	TRUE	FALSE
Q8TBF4	ZCRB1	0.56	3.07	0.0363	0.0876	-0.0387	2.51	-0.524	-0.472	-0.599	-3.04	-2.98	-3.11	0.0513	-0.0749	-0.126	0.0623	5.89e-08	0.897	0.755	0.89	5.84e-07	0.0789	0.109	0.0483	6.76e-08	8.23e-08	5.09e-08	0.855	0.789	0.653	0.0971	9.39e-08	0.912	0.795	0.908	9.06e-07	0.108	0.164	0.0687	1.41e-07	1.49e-07	1.07e-07	0.879	0.849	0.696	FALSE	TRUE	FALSE
Q8WU90	ZC3H15	-0.608	-4.08	-1.19	-1.14	-1.09	-3.47	-0.584	-0.528	-0.48	2.89	2.94	2.99	0.0558	0.105	0.0489	5.62e-07	3.94e-17	1.97e-10	3.55e-10	6.07e-10	3.05e-16	8.82e-07	2.63e-06	7.36e-06	3.14e-15	2.47e-15	2e-15	0.414	0.138	0.473	3.74e-06	3.11e-16	1.15e-09	3.1e-09	3.88e-09	2.31e-15	3.01e-06	1.19e-05	2.05e-05	2.4e-14	1.59e-14	1.53e-14	0.47	0.226	0.527	FALSE	TRUE	TRUE
Q8WUA2	PPIL4	0.274	-2.91	0.101	-3.56	0.42	-3.19	-0.173	-3.83	0.147	3.02	-0.646	3.34	-3.66	0.319	3.98	0.18	1.69e-09	0.61	1.48e-10	0.0488	5.7e-10	0.387	5.92e-11	0.461	1.12e-09	0.00539	3.29e-10	1.05e-10	0.122	3.73e-11	0.242	3.18e-09	0.653	1.45e-09	0.068	1.29e-09	0.449	1.03e-09	0.521	2.98e-09	0.00619	9.31e-10	1.11e-09	0.206	4.35e-10	FALSE	TRUE	FALSE
Q8WVV9	HNRNPLL	-0.842	-2.95	-0.484	-0.964	-0.398	-2.1	0.358	-0.122	0.445	2.46	1.98	2.55	-0.48	0.0868	0.566	1.25e-11	1.74e-18	1.06e-08	2.32e-12	1.07e-07	1.25e-16	3.58e-07	0.00639	2.93e-08	1.7e-17	2.66e-16	1.1e-17	1.2e-08	0.0374	1.63e-09	5.42e-10	2.05e-17	4.32e-08	4.12e-11	4.22e-07	1.08e-15	1.32e-06	0.0134	1.33e-07	2.6e-16	2.27e-15	1.56e-16	6.58e-08	0.0807	1.13e-08	FALSE	TRUE	FALSE
Q8WXF1	PSPC1	-0.524	-4.42	-4.01	-1.56	-4.09	-3.89	-3.49	-1.03	-3.57	0.403	2.86	0.326	2.46	-0.077	-2.54	0.000125	1.71e-15	5.72e-15	7.71e-10	4.5e-15	8.41e-15	3.34e-14	1.01e-07	2.53e-14	0.00114	4.06e-13	0.0051	2.72e-12	0.439	1.85e-12	0.000408	8.56e-15	1.19e-13	6.01e-09	1.03e-13	4.42e-14	7.31e-13	6.62e-07	6.01e-13	0.00148	1.62e-12	0.00619	4.84e-11	0.554	3.52e-11	FALSE	TRUE	TRUE
Q92615	LARP4B	-0.00485	1.71	0.329	-0.0168	0.148	1.71	0.334	-0.012	0.153	-1.38	-1.72	-1.56	-0.346	-0.181	0.165	0.91	7.99e-15	3.33e-06	0.696	0.0039	7.71e-15	2.85e-06	0.78	0.00314	1.19e-13	7.06e-15	2.52e-14	1.95e-06	0.000914	0.00184	0.932	3.43e-14	8.6e-06	0.745	0.00665	4.09e-14	8.61e-06	0.833	0.00559	6.19e-13	4.06e-14	1.44e-13	6.46e-06	0.00363	0.0033	FALSE	TRUE	FALSE
Q92804	TAF15	-0.5	-2.02	-0.553	-0.419	-1.14	-1.52	-0.0527	0.0813	-0.642	1.46	1.6	0.874	0.134	-0.59	-0.724	0.022	1.23e-07	0.0131	0.0484	5.22e-05	2.93e-06	0.788	0.679	0.00537	4.27e-06	1.67e-06	0.00057	0.497	0.00906	0.0024	0.0389	1.9e-07	0.0192	0.0684	0.000121	4.23e-06	0.825	0.751	0.00913	7.19e-06	2.61e-06	0.000759	0.551	0.025	0.00422	FALSE	TRUE	FALSE
Q92879	CELF1	-0.348	-3.64	-0.581	-0.199	-0.36	-3.29	-0.234	0.148	-0.0124	3.05	3.44	3.28	0.382	0.221	-0.161	0.00283	1.48e-14	3.74e-05	0.055	0.00221	5.26e-14	0.028	0.14	0.898	1.33e-13	3.02e-14	5.52e-14	0.00143	0.0358	0.112	0.00636	5.96e-14	8.15e-05	0.0768	0.00394	2.3e-13	0.0421	0.203	0.913	6.82e-13	1.52e-13	2.92e-13	0.00273	0.0781	0.145	FALSE	TRUE	FALSE
Q96AE4	FUBP1	-0.332	-4.98	-0.0228	-0.384	0.739	-4.65	0.309	-0.0523	1.07	4.96	4.6	5.72	-0.361	0.762	1.12	3.32e-05	1.93e-19	0.674	7.58e-06	4.55e-09	4.63e-19	6.61e-05	0.344	4.97e-11	2.05e-19	5.35e-19	3.33e-20	1.42e-05	3.16e-09	2.76e-11	0.000129	3.36e-18	0.715	2.25e-05	2.36e-08	9.53e-18	0.000154	0.431	4.42e-10	7.75e-18	1.19e-17	1.62e-18	3.94e-05	1.14e-07	3.34e-10	FALSE	TRUE	FALSE
Q96DH6	MSI2	-0.215	2.04	-0.3	0.0303	-0.166	2.25	-0.0844	0.246	0.0494	-2.34	-2.01	-2.2	0.33	0.134	-0.196	2.23e-06	2.41e-18	5.4e-08	0.275	3.3e-05	6.75e-19	0.00743	5.24e-07	0.0857	4.23e-19	2.92e-18	8.94e-19	1.74e-08	0.000241	6.01e-06	1.19e-05	2.7e-17	1.91e-07	0.33	7.95e-05	1.26e-17	0.0125	2.82e-06	0.115	1.33e-17	4.8e-17	2.23e-17	9e-08	0.00119	1.75e-05	FALSE	TRUE	FALSE
Q96EP5	DAZAP1	-0.551	-3.6	-1.46	-0.69	-0.628	-3.05	-0.906	-0.139	-0.0773	2.14	2.91	2.97	0.767	0.829	0.0615	6.86e-09	4.4e-19	4.14e-14	4.55e-10	1.41e-09	3.62e-18	1.59e-11	0.005	0.0822	3.16e-16	6.54e-18	5.02e-18	1.24e-10	4.79e-11	0.158	9.02e-08	6.51e-18	6.61e-13	3.84e-09	8.22e-09	5.11e-17	1.7e-10	0.0109	0.111	3.13e-15	9.17e-17	8.62e-17	1.29e-09	5.44e-09	0.198	FALSE	TRUE	TRUE
Q96G46	DUS3L	0.041	1.48	0.131	-0.416	0.299	1.43	0.0905	-0.457	0.258	-1.34	-1.89	-1.18	-0.547	0.167	0.715	0.27	5.88e-15	0.00277	3.59e-08	1.51e-06	8.39e-15	0.0247	1.18e-08	7.26e-06	1.91e-14	2.55e-16	1.02e-13	1.35e-09	0.000432	5.15e-11	0.344	2.6e-14	0.00452	1.74e-07	4.62e-06	4.42e-14	0.0378	9.91e-08	2.02e-05	1.19e-13	2.18e-15	5.11e-13	9.66e-09	0.00196	5.68e-10	FALSE	TRUE	FALSE
Q96GM8	TOE1	-0.199	1.95	0.0133	-0.592	0.356	2.15	0.212	-0.394	0.555	-1.94	-2.54	-1.59	-0.606	0.342	0.948	0.0381	1.15e-11	0.88	1.24e-05	0.00122	3.44e-12	0.0286	0.000548	2.4e-05	1.25e-11	4.19e-13	1.39e-10	9.85e-06	0.00162	7.08e-08	0.0633	2.88e-11	0.899	3.51e-05	0.00227	1.08e-11	0.0429	0.00151	6.11e-05	4.49e-11	1.66e-12	4.14e-10	2.81e-05	0.00596	3.16e-07	FALSE	TRUE	FALSE
Q96I24	FUBP3	-0.354	-3.27	-0.372	-0.369	-0.149	-2.91	-0.0185	-0.0151	0.205	2.89	2.9	3.12	0.0034	0.223	0.22	4.94e-05	1.55e-16	3.01e-05	3.3e-05	0.0256	6.63e-16	0.76	0.803	0.00431	7.18e-16	7.08e-16	2.81e-16	0.955	0.00239	0.00266	0.000182	1.03e-15	6.64e-05	8.51e-05	0.0379	4.64e-15	0.801	0.85	0.00749	6.37e-15	5.26e-15	2.66e-15	0.962	0.00818	0.00464	FALSE	TRUE	FALSE
Q96KR1	ZFR	-0.289	0.632	-0.44	-0.201	-0.0897	0.921	-0.151	0.0876	0.199	-1.07	-0.833	-0.721	0.238	0.35	0.112	9.78e-08	7.62e-12	6.64e-10	5.32e-06	0.00559	6.81e-14	9.45e-05	0.0065	5.95e-06	1.01e-14	2.39e-13	1.45e-12	8.65e-07	1.04e-08	0.0012	8.24e-07	1.95e-11	3.5e-09	1.63e-05	0.00926	2.95e-13	0.000215	0.0136	1.69e-05	6.74e-14	1e-12	5.86e-12	3.11e-06	3.08e-07	0.00224	FALSE	FALSE	FALSE
Q96LT9	RNPC3	0.0139	3	0.435	0.56	0.432	2.98	0.421	0.546	0.418	-2.56	-2.44	-2.56	0.125	-0.00303	-0.128	0.842	2.9e-15	2.7e-05	1.98e-06	2.89e-05	3.08e-15	3.72e-05	2.59e-06	3.99e-05	2.1e-14	3.95e-14	2.07e-14	0.0913	0.965	0.0845	0.877	1.38e-14	6e-05	6.55e-06	7.05e-05	1.85e-14	9.08e-05	1.18e-05	9.78e-05	1.29e-13	1.93e-13	1.21e-13	0.122	0.975	0.112	FALSE	TRUE	FALSE
Q96MU7	YTHDC1	0.0612	1.52	0.394	0.751	0.126	1.46	0.332	0.69	0.0653	-1.13	-0.769	-1.39	0.357	-0.267	-0.625	0.0833	1.31e-15	2.41e-08	9.26e-12	0.00195	2.2e-15	1.71e-07	2.66e-11	0.0666	5.75e-14	6.85e-12	3.93e-15	7.4e-08	1.95e-06	9.08e-11	0.126	6.82e-15	9.06e-08	1.35e-10	0.00351	1.38e-14	6.73e-07	5.25e-10	0.092	3.16e-13	2.24e-11	2.71e-14	3.35e-07	2.14e-05	9.13e-10	FALSE	TRUE	FALSE
Q96PK6	RBM14	-0.274	-0.215	-1.42	-0.403	-1.31	0.0589	-1.14	-0.128	-1.03	-1.2	-0.187	-1.09	1.01	0.108	-0.906	3.79e-07	5.29e-06	6.85e-16	4.31e-09	1.86e-15	0.0623	1.04e-14	0.000681	3.62e-14	5.51e-15	2.23e-05	1.8e-14	4.67e-14	0.00259	1.92e-13	2.69e-06	7.03e-06	1.85e-14	2.68e-08	4.69e-14	0.0666	2.66e-13	0.00183	7.87e-13	3.94e-14	3.1e-05	1.07e-13	1.61e-12	0.00869	4.81e-12	FALSE	FALSE	TRUE
Q96PU8	QKI	-0.256	-1.59	-3.25	-3.38	-5.43	-1.33	-2.99	-3.13	-5.18	-1.66	-1.8	-3.85	-0.136	-2.18	-2.05	0.00184	4.95e-12	6e-16	3.57e-16	8.82e-19	4.4e-11	1.69e-15	9.65e-16	1.63e-18	2.77e-12	1.03e-12	7.03e-17	0.0578	8.92e-14	2e-13	0.00436	1.29e-11	1.66e-14	3.07e-14	6.56e-17	1.17e-10	5.83e-14	1.36e-13	1.5e-16	1.09e-11	3.84e-12	7.86e-16	0.0807	2.94e-11	5e-12	FALSE	TRUE	TRUE
Q96QC0	PPP1R10	-0.0998	-1.99	-0.685	-0.44	-0.549	-1.89	-0.586	-0.34	-0.449	1.31	1.55	1.44	0.246	0.137	-0.109	0.15	2.82e-13	1.24e-07	1.55e-05	1.5e-06	5.38e-13	7.34e-07	0.000181	1.26e-05	5.43e-11	6.4e-12	1.58e-11	0.00244	0.0566	0.119	0.208	9.01e-13	4.06e-07	4.3e-05	4.62e-06	1.94e-12	2.55e-06	0.000546	3.36e-05	1.75e-10	2.1e-11	5.41e-11	0.00446	0.113	0.154	FALSE	TRUE	FALSE
Q99729	HNRNPAB	-0.546	0.443	-0.596	-0.941	-0.524	0.989	-0.0501	-0.395	0.0216	-1.04	-1.38	-0.967	-0.345	0.0717	0.416	6.13e-07	5.91e-06	2.28e-07	1.05e-09	9.6e-07	5.71e-10	0.418	1.93e-05	0.724	3.12e-10	9.1e-12	7.48e-10	7.23e-05	0.253	1.12e-05	4.04e-06	7.83e-06	7.02e-07	7.8e-09	3.09e-06	1.29e-09	0.481	7.23e-05	0.76	8.98e-10	2.91e-11	2.03e-09	0.000175	0.365	3.11e-05	FALSE	FALSE	FALSE
Q9BQ04	RBM4B	0.0322	1.51	0.0511	-0.156	0.342	1.48	0.0189	-0.188	0.31	-1.46	-1.66	-1.17	-0.207	0.291	0.498	0.384	4.83e-15	0.177	0.000836	3.6e-07	6.35e-15	0.607	0.00017	1.08e-06	7.47e-15	1.4e-15	1.24e-13	7.04e-05	2.15e-06	4.57e-09	0.461	2.19e-14	0.216	0.00165	1.27e-06	3.44e-14	0.665	0.000516	3.56e-06	5.17e-14	9.63e-15	6.13e-13	0.000171	2.33e-05	2.78e-08	FALSE	TRUE	FALSE
Q9BRZ2	TRIM56	-0.293	0.764	-0.476	-0.407	-0.218	1.06	-0.183	-0.113	0.0752	-1.24	-1.17	-0.982	0.0692	0.258	0.189	0.0416	5.72e-05	0.00288	0.00796	0.116	2.07e-06	0.182	0.397	0.571	3.55e-07	6.75e-07	4.55e-06	0.602	0.0682	0.169	0.0684	7.09e-05	0.00468	0.0132	0.151	3.04e-06	0.231	0.487	0.627	6.81e-07	1.1e-06	7.62e-06	0.65	0.131	0.21	FALSE	FALSE	FALSE
Q9BY77	POLDIP3	0.000863	-0.902	-1.68	-0.538	-1.41	-0.902	-1.68	-0.539	-1.41	-0.775	0.363	-0.504	1.14	0.271	-0.868	0.99	8.26e-09	4.15e-12	2.95e-06	3.7e-11	8.17e-09	4.12e-12	2.9e-06	3.67e-11	4.92e-08	0.000146	5.88e-06	4.95e-10	0.00165	1.3e-08	0.993	1.44e-08	3.73e-11	9.45e-06	3.07e-10	1.56e-08	5.2e-11	1.3e-05	3.43e-10	1.05e-07	0.000188	9.72e-06	4.08e-09	0.00602	7.01e-08	FALSE	FALSE	TRUE
Q9BZI7	UPF3B	-0.329	-1.65	-0.752	-0.677	-0.8	-1.32	-0.423	-0.348	-0.471	0.896	0.97	0.847	0.0745	-0.0486	-0.123	0.252	4.78e-05	0.017	0.0284	0.0122	0.000361	0.148	0.227	0.11	0.00625	0.00373	0.00877	0.79	0.862	0.661	0.323	5.97e-05	0.0245	0.0423	0.019	0.000439	0.19	0.305	0.144	0.00756	0.00434	0.0105	0.822	0.902	0.703	FALSE	TRUE	FALSE
Q9H000	MKRN2	-0.318	-2.63	-0.383	-0.52	0.22	-2.31	-0.0655	-0.202	0.537	2.25	2.11	2.85	-0.137	0.603	0.74	0.0835	2.67e-08	0.043	0.0143	0.213	3.4e-09	0.586	0.152	0.00103	4.46e-09	2.32e-08	4.64e-10	0.318	0.000455	0.000226	0.126	4.38e-08	0.0578	0.0226	0.259	6.9e-09	0.646	0.218	0.00198	1.09e-08	4.5e-08	1.29e-09	0.372	0.00204	0.000486	FALSE	TRUE	FALSE
Q9H0L4	CSTF2T	NA	NA	NA	NA	NA	NA	NA	NA	NA	NA	NA	4.6	NA	NA	NA	NA	NA	NA	NA	NA	NA	NA	NA	NA	NA	NA	9.21e-07	NA	NA	NA	NA	NA	NA	NA	NA	NA	NA	NA	NA	NA	NA	1.68e-06	NA	NA	NA	FALSE	FALSE	FALSE
Q9H501	ESF1	1.38	1.22	1.09	1.34	0.408	-0.166	-0.298	-0.0408	-0.976	-0.132	0.126	-0.809	0.257	-0.677	-0.935	4.07e-08	1.79e-07	6.51e-07	5.77e-08	0.00477	0.188	0.0274	0.739	2.1e-06	0.291	0.314	1.49e-05	0.0513	8.44e-05	3.33e-06	3.97e-07	2.71e-07	1.86e-06	2.63e-07	0.00801	0.197	0.0413	0.801	6.54e-06	0.309	0.326	2.35e-05	0.0726	0.000498	1.03e-05	TRUE	TRUE	TRUE
Q9H6S0	YTHDC2	0.195	2.39	0.325	0.0981	0.297	2.19	0.131	-0.0965	0.102	-2.06	-2.29	-2.09	-0.227	-0.0287	0.199	0.000505	1.12e-16	3.73e-06	0.0369	9.81e-06	3.28e-16	0.00854	0.0396	0.031	7.13e-16	1.9e-16	5.99e-16	0.000131	0.508	0.000427	0.00138	7.67e-16	9.57e-06	0.0538	2.59e-05	2.46e-15	0.0143	0.0682	0.0459	6.34e-15	1.7e-15	5.11e-15	0.000305	0.618	0.000866	FALSE	TRUE	FALSE
Q9HBD1	RC3H2	NA	NA	NA	NA	NA	-0.68	-0.334	-0.0187	0.446	0.346	0.661	1.13	0.315	0.78	0.465	NA	NA	NA	NA	NA	0.0151	0.166	0.932	0.0802	0.0717	0.00621	0.000456	0.118	0.00441	0.0369	NA	NA	NA	NA	NA	0.0167	0.211	0.95	0.109	0.0799	0.0071	0.000613	0.154	0.0135	0.0526	FALSE	FALSE	FALSE
Q9HDC9	APMAP	NA	NA	NA	NA	NA	NA	NA	NA	NA	-0.0149	3.8	0.00654	3.82	0.0215	-3.8	NA	NA	NA	NA	NA	NA	NA	NA	NA	0.937	1.07e-07	0.972	1.04e-07	0.909	1.08e-07	NA	NA	NA	NA	NA	NA	NA	NA	NA	0.941	1.91e-07	0.976	4.58e-07	0.936	4.61e-07	FALSE	FALSE	FALSE
Q9NP64	ZCCHC17	-0.272	1.41	-0.507	0.614	-0.58	1.68	-0.234	0.886	-0.308	-1.92	-0.795	-1.99	1.12	-0.0734	-1.19	0.000126	8.19e-13	1.97e-07	2.14e-08	4.14e-08	8.89e-14	0.000467	2.57e-10	3.98e-05	1.72e-14	9.71e-10	1.07e-14	1.42e-11	0.168	6.44e-12	0.000411	2.41e-12	6.15e-07	1.09e-07	1.78e-07	3.77e-13	0.000961	3.54e-09	9.77e-05	1.08e-13	2.27e-09	6.59e-14	1.96e-10	0.266	9.7e-11	FALSE	TRUE	FALSE
Q9NR56	MBNL1	-0.203	-3.1	0.071	0.185	0.333	-2.89	0.274	0.389	0.536	3.17	3.28	3.43	0.114	0.262	0.148	4.56e-05	2.42e-19	0.0554	0.00011	2.46e-07	5.73e-19	2.11e-06	4.15e-08	8.87e-10	1.81e-19	1.16e-19	6.62e-20	0.00492	3.46e-06	0.000771	0.000169	4.08e-18	0.0733	0.000258	8.94e-07	1.13e-17	6.59e-06	2.93e-07	5.67e-09	7.14e-18	3.67e-18	2.82e-18	0.00847	3.49e-05	0.00149	FALSE	TRUE	FALSE
Q9NRX1	PNO1	0.882	1.89	0.924	0.467	0.563	1.01	0.0425	-0.415	-0.319	-0.969	-1.43	-1.33	-0.457	-0.361	0.0961	3.18e-08	2.87e-12	1.83e-08	3.24e-05	4.81e-06	6.29e-09	0.579	0.000101	0.000963	1.05e-08	9.67e-11	2.28e-10	4e-05	0.000346	0.221	3.2e-07	7.7e-12	7.1e-08	8.37e-05	1.34e-05	1.23e-08	0.639	0.000324	0.00185	2.45e-08	2.63e-10	6.56e-10	0.000102	0.00161	0.267	FALSE	TRUE	FALSE
Q9NTZ6	RBM12	0.449	-2.94	0.457	0.421	-0.058	-3.39	0.00808	-0.0278	-0.507	3.4	3.36	2.88	-0.0359	-0.515	-0.479	0.145	3.49e-07	0.139	0.169	0.86	7.56e-08	0.978	0.925	0.141	7.37e-08	8.27e-08	1.38e-06	0.903	0.136	0.163	0.202	5.15e-07	0.172	0.213	0.884	1.3e-07	0.983	0.945	0.181	1.53e-07	1.49e-07	2.45e-06	0.92	0.224	0.203	FALSE	TRUE	FALSE
Q9NW13	RBM28	-0.0396	1.51	0.0216	0.198	-0.0122	1.55	0.0612	0.237	0.0273	-1.49	-1.31	-1.52	0.176	-0.0339	-0.21	0.244	1.35e-15	0.517	4.16e-05	0.712	9.72e-16	0.0821	6.62e-06	0.415	1.62e-15	7.93e-15	1.22e-15	0.000124	0.316	2.3e-05	0.315	6.98e-15	0.566	0.000105	0.752	6.55e-15	0.112	2.75e-05	0.476	1.31e-14	4.5e-14	9.7e-15	0.000289	0.434	6.02e-05	FALSE	TRUE	FALSE
Q9NW64	RBM22	-0.124	-1.26	0.132	0.432	0.297	-1.13	0.256	0.556	0.421	1.39	1.69	1.55	0.3	0.165	-0.135	0.0788	7.82e-11	0.0624	1.68e-05	0.000529	2.79e-10	0.00172	1.19e-06	2.2e-05	2.27e-11	1.99e-12	5.62e-12	0.000489	0.0243	0.0576	0.12	1.74e-10	0.0817	4.64e-05	0.00105	6.62e-10	0.00323	5.81e-06	5.65e-05	7.77e-11	7.06e-12	2.03e-11	0.00103	0.0568	0.0795	FALSE	TRUE	FALSE
Q9NWB6	ARGLU1	-0.31	1.99	-0.268	0.249	-0.124	2.3	0.0415	0.559	0.186	-2.26	-1.74	-2.12	0.517	0.144	-0.373	1.6e-09	1.14e-19	8.96e-09	2.15e-08	4.35e-05	1.82e-20	0.0634	1.09e-12	6.23e-07	2.29e-20	6.22e-19	5.3e-20	2.87e-12	9.41e-06	1.65e-10	2.74e-08	2.21e-18	3.71e-08	1.09e-07	0.000102	9.03e-19	0.0887	3.52e-11	2.15e-06	1.58e-18	1.31e-17	2.45e-18	5.03e-11	8.06e-05	1.54e-09	FALSE	TRUE	FALSE
Q9NWH9	SLTM	-0.317	1.02	-0.169	-0.279	-0.184	1.34	0.148	0.038	0.133	-1.19	-1.3	-1.21	-0.11	-0.0149	0.0952	0.000424	1.56e-09	0.0261	0.00118	0.0172	5.71e-11	0.0465	0.582	0.0694	2.41e-10	8.14e-11	2.07e-10	0.126	0.828	0.18	0.00118	2.95e-09	0.0365	0.00228	0.0262	1.51e-10	0.0672	0.665	0.0955	7.06e-10	2.25e-10	6.01e-10	0.163	0.877	0.223	FALSE	TRUE	FALSE
Q9NXG2	THUMPD1	0.152	1.37	0.297	0.00188	0.276	1.22	0.145	-0.15	0.123	-1.07	-1.37	-1.09	-0.295	-0.0212	0.274	0.000518	6.03e-15	7.25e-07	0.955	1.64e-06	2.67e-14	0.000787	0.000574	0.00259	1.32e-13	6.14e-15	1.03e-13	7.78e-07	0.532	1.76e-06	0.00141	2.66e-14	2.05e-06	0.962	4.98e-06	1.24e-13	0.00155	0.00157	0.00466	6.76e-13	3.56e-14	5.15e-13	2.82e-06	0.641	5.84e-06	FALSE	TRUE	FALSE
Q9NXH9	TRMT1	0.715	-0.815	1.04	0.76	0.595	-1.53	0.33	0.0453	-0.119	1.86	1.57	1.41	-0.285	-0.449	-0.165	0.00749	0.00322	0.000488	0.0051	0.0205	1.43e-05	0.167	0.844	0.605	1.83e-06	1.06e-05	3.21e-05	0.228	0.0676	0.478	0.0149	0.00362	0.000901	0.00878	0.0309	1.93e-05	0.213	0.882	0.657	3.22e-06	1.52e-05	4.87e-05	0.278	0.13	0.531	FALSE	FALSE	TRUE
Q9P273	TENM3	NA	NA	NA	NA	NA	-5.48	-4.57	-1.8	-3.79	0.911	3.68	1.69	2.77	0.777	-1.99	NA	NA	NA	NA	NA	1.5e-08	5.03e-08	8.1e-05	1.74e-07	0.000181	2.11e-07	3.64e-06	1.38e-06	0.000465	1.17e-05	NA	NA	NA	NA	NA	2.77e-08	2.24e-07	0.000267	6.73e-07	0.000252	3.65e-07	6.16e-06	4.72e-06	0.00207	3.24e-05	FALSE	FALSE	FALSE
Q9UGR2	ZC3H7B	0.166	-1.22	-0.674	0.0533	-0.682	-1.39	-0.84	-0.112	-0.848	0.548	1.28	0.54	0.728	-0.00753	-0.735	0.515	0.000291	0.0177	0.833	0.0167	9.31e-05	0.00496	0.657	0.00468	0.0459	0.000201	0.0485	0.0118	0.976	0.0111	0.591	0.000345	0.0253	0.864	0.0256	0.000118	0.00863	0.734	0.00809	0.0521	0.000256	0.0548	0.0189	0.983	0.0174	FALSE	TRUE	FALSE
Q9UJV9	DDX41	0.401	0.967	0.418	1.04	0.227	0.566	0.0169	0.642	-0.174	-0.549	0.0755	-0.74	0.625	-0.191	-0.815	5.2e-06	1.91e-10	3.35e-06	7.56e-11	0.00101	1.14e-07	0.757	2.66e-08	0.0065	1.62e-07	0.182	4.9e-09	3.64e-08	0.00356	1.52e-09	2.49e-05	4.05e-10	8.66e-06	8.2e-10	0.00191	1.93e-07	0.799	1.98e-07	0.0109	3.25e-07	0.192	1.17e-08	1.75e-07	0.0113	1.07e-08	FALSE	FALSE	FALSE
Q9UKA9	PTBP2	-0.342	-4.29	-0.429	-0.351	-0.265	-3.95	-0.0875	-0.00949	0.0761	3.86	3.94	4.02	0.078	0.164	0.0856	0.00303	1.68e-15	0.000539	0.00251	0.0142	4.79e-15	0.367	0.921	0.431	6.35e-15	4.93e-15	3.76e-15	0.42	0.104	0.377	0.00676	8.42e-15	0.00099	0.00458	0.022	2.7e-14	0.428	0.943	0.491	4.46e-14	2.93e-14	2.62e-14	0.475	0.182	0.43	FALSE	TRUE	FALSE
Q9UKM9	RALY	-0.277	1.66	0.161	0.158	0.387	1.94	0.438	0.435	0.664	-1.5	-1.51	-1.28	-0.00287	0.226	0.229	2.78e-08	5.69e-18	1.13e-05	1.35e-05	4.99e-10	8.06e-19	1.1e-10	1.19e-10	6.22e-13	2.07e-17	2.02e-17	1.63e-16	0.903	2.9e-07	2.51e-07	2.9e-07	5.6e-17	2.66e-05	3.8e-05	3.24e-09	1.48e-17	9.27e-10	1.83e-09	9.45e-12	3.02e-16	2.34e-16	1.69e-15	0.921	4.34e-06	1.01e-06	FALSE	TRUE	FALSE
Q9UKV3	ACIN1	-0.122	-0.556	0.0151	0.559	-0.057	-0.434	0.137	0.681	0.0649	0.571	1.11	0.499	0.544	-0.072	-0.616	0.00354	6.77e-10	0.667	6.43e-10	0.12	1.33e-08	0.00155	5.71e-11	0.0802	4.89e-10	1.21e-13	2.51e-09	8.97e-10	0.0553	1.96e-10	0.00772	1.34e-09	0.708	5.14e-09	0.154	2.47e-08	0.00292	9.99e-10	0.109	1.37e-09	5.42e-13	6.24e-09	6.78e-09	0.111	1.78e-09	FALSE	FALSE	FALSE
Q9ULW3	ABT1	-0.375	-1.32	-0.343	-0.14	-0.347	-0.942	0.0317	0.235	0.0277	0.974	1.18	0.97	0.204	-0.00401	-0.208	0.00314	1.28e-08	0.00562	0.2	0.00522	6.09e-07	0.764	0.0405	0.793	4.21e-07	4.77e-08	4.4e-07	0.0706	0.97	0.0659	0.00696	2.18e-08	0.0087	0.248	0.00869	9.43e-07	0.805	0.0694	0.82	7.98e-07	8.9e-08	8.33e-07	0.0967	0.979	0.0897	FALSE	TRUE	FALSE
Q9UPN6	SCAF8	0.531	-0.901	0.457	-0.754	0.285	-1.43	-0.0741	-1.28	-0.246	1.36	0.147	1.19	-1.21	-0.172	1.04	2.36e-05	7.47e-08	9.98e-05	5.65e-07	0.00431	2.95e-10	0.384	1.1e-09	0.0105	5.64e-10	0.0979	2.91e-09	2.26e-09	0.0568	1.41e-08	9.55e-05	1.18e-07	0.000204	2.11e-06	0.00729	6.95e-10	0.446	1.28e-08	0.0169	1.57e-09	0.105	7.2e-09	1.5e-08	0.113	7.49e-08	FALSE	FALSE	FALSE
Q9UPQ9	TNRC6B	-0.469	-2.17	-0.877	-0.153	-0.666	-1.7	-0.408	0.316	-0.197	1.29	2.02	1.5	0.724	0.211	-0.513	0.0297	5.26e-08	0.000551	0.44	0.00423	8.42e-07	0.0536	0.123	0.323	1.55e-05	1.23e-07	3.22e-06	0.00239	0.292	0.0193	0.0507	8.41e-08	0.00101	0.499	0.00716	1.29e-06	0.0765	0.182	0.381	2.45e-05	2.17e-07	5.49e-06	0.00437	0.409	0.029	FALSE	TRUE	FALSE
Q9UPT8	ZC3H4	-0.164	0.681	0.159	-0.487	-0.0938	0.845	0.323	-0.323	0.07	-0.522	-1.17	-0.775	-0.646	-0.253	0.393	0.00238	1.05e-09	0.00296	5.74e-08	0.0501	7.52e-11	5.56e-06	5.51e-06	0.131	2.52e-08	1.35e-12	2.18e-10	2.01e-09	6.43e-05	6.58e-07	0.00549	2.02e-09	0.00479	2.62e-07	0.0696	1.95e-10	1.59e-05	2.33e-05	0.169	5.54e-08	4.91e-12	6.3e-10	1.37e-08	0.000396	2.38e-06	FALSE	FALSE	FALSE
Q9Y2V2	CARHSP1	NA	NA	NA	NA	NA	-3.58	0.816	0.0639	0.24	4.4	3.64	3.82	-0.752	-0.576	0.176	NA	NA	NA	NA	NA	5.78e-05	0.0553	0.818	0.492	2.23e-05	1.07e-05	4.28e-05	0.0379	0.137	0.535	NA	NA	NA	NA	NA	7.44e-05	0.0784	0.862	0.551	3.45e-05	1.53e-05	6.4e-05	0.0553	0.226	0.587	FALSE	FALSE	FALSE
Q9Y388	RBMX2	0.031	2.57	-0.006	0.187	0.0368	2.53	-0.037	0.156	0.00586	-2.57	-2.38	-2.53	0.193	0.0428	-0.15	0.544	3.7e-16	0.906	0.00248	0.472	4.32e-16	0.47	0.00809	0.908	3.59e-16	9.63e-16	4.44e-16	0.00197	0.404	0.0101	0.619	2.19e-15	0.919	0.00453	0.53	3.13e-15	0.532	0.0165	0.922	3.48e-15	6.89e-15	3.94e-15	0.00366	0.521	0.016	FALSE	TRUE	FALSE
Q9Y3A4	RRP7A	0.155	1.78	-0.148	0.157	-0.124	1.63	-0.303	0.00158	-0.279	-1.93	-1.62	-1.91	0.305	0.0243	-0.281	0.217	2.01e-09	0.238	0.213	0.32	6.02e-09	0.0251	0.99	0.0367	7.64e-10	6.09e-09	8.91e-10	0.0245	0.842	0.0358	0.286	3.74e-09	0.281	0.263	0.376	1.18e-08	0.0383	0.992	0.0534	2.09e-09	1.27e-08	2.38e-09	0.037	0.89	0.0513	FALSE	TRUE	FALSE
Q9Y4C8	RBM19	0.531	2.98	0.479	0.458	0.164	2.45	-0.0526	-0.0736	-0.368	-2.5	-2.52	-2.82	-0.021	-0.315	-0.294	3.84e-07	2.44e-16	1.22e-06	1.99e-06	0.012	2.93e-15	0.364	0.211	1.96e-05	2.24e-15	2.02e-15	4.99e-16	0.713	8.73e-05	0.000164	2.7e-06	1.53e-15	3.35e-06	6.6e-06	0.0187	1.77e-14	0.425	0.287	5.06e-05	1.77e-14	1.34e-14	4.34e-15	0.752	0.00051	0.000361	FALSE	TRUE	FALSE
Q9Y5A9	YTHDF2	0.12	-1.32	-0.346	0.236	-0.283	-1.44	-0.466	0.116	-0.404	0.978	1.56	1.04	0.582	0.0627	-0.52	0.0356	2.2e-12	1.48e-05	0.000511	0.000103	7.43e-13	6.14e-07	0.0415	2.98e-06	9.48e-11	2.82e-13	4.4e-11	4.88e-08	0.242	1.81e-07	0.0596	6.04e-12	3.43e-05	0.00105	0.000226	2.63e-12	2.16e-06	0.0708	9.01e-06	2.95e-10	1.16e-12	1.41e-10	2.29e-07	0.354	7.46e-07	FALSE	TRUE	FALSE
Q9Y5S9	RBM8A	-0.257	-1.7	-0.403	0.598	-0.0223	-1.45	-0.146	0.854	0.234	1.3	2.3	1.68	1	0.38	-0.62	0.000703	4.38e-13	1.11e-05	1.49e-07	0.706	3.38e-12	0.0256	2.21e-09	0.00143	1.27e-11	9.94e-15	5.16e-13	3.25e-10	1.97e-05	9.8e-08	0.00184	1.35e-12	2.62e-05	6.31e-07	0.747	1.06e-11	0.039	2.32e-08	0.00267	4.54e-11	5.52e-14	2.28e-12	2.92e-09	0.000151	4.22e-07	FALSE	TRUE	FALSE
Q9Y6M1	IGF2BP2	-0.428	0.562	-0.463	-0.595	-0.175	0.989	-0.0351	-0.167	0.253	-1.02	-1.16	-0.736	-0.132	0.288	0.42	1.49e-08	5.57e-10	5.83e-09	2.77e-10	0.000202	5.01e-13	0.321	0.000294	5.47e-06	3.23e-13	7.03e-14	2e-11	0.00191	1.36e-06	1.82e-08	1.73e-07	1.11e-09	2.53e-08	2.5e-09	0.000428	1.82e-12	0.383	0.000851	1.57e-05	1.53e-12	3.27e-13	6.69e-11	0.00355	1.58e-05	9.37e-08	FALSE	FALSE	FALSE
O43251	RBFOX2	-0.819	-0.24	-0.689	-0.592	-0.341	0.579	0.13	0.226	0.478	-0.449	-0.353	-0.101	0.0962	0.348	0.252	1.93e-11	2.72e-05	1.64e-10	1.03e-09	6.65e-07	1.36e-09	0.00438	4.77e-05	1.35e-08	2.83e-08	4.54e-07	0.019	0.0242	5.29e-07	1.68e-05	7.44e-10	3.46e-05	9.79e-10	7.68e-09	2.22e-06	2.91e-09	0.00771	0.000165	6.63e-08	6.2e-08	7.55e-07	0.0221	0.0365	7.1e-06	4.52e-05	FALSE	FALSE	FALSE
O75179	ANKRD17	-0.107	0.0127	-0.086	-0.378	-0.116	0.12	0.0209	-0.271	-0.00877	-0.0988	-0.391	-0.128	-0.292	-0.0297	0.262	0.000646	0.602	0.00328	9.45e-10	0.000335	0.00025	0.397	4.99e-08	0.719	0.00121	6.32e-10	0.000133	2.09e-08	0.236	7.32e-08	0.0017	0.612	0.00527	7.19e-09	0.000682	0.000308	0.459	3.46e-07	0.757	0.00156	1.52e-09	0.000189	1.06e-07	0.346	3.26e-07	FALSE	FALSE	FALSE
O75525	KHDRBS3	-0.196	0.117	-0.637	-0.531	-0.446	0.313	-0.441	-0.335	-0.25	-0.754	-0.648	-0.563	0.106	0.191	0.0851	0.357	0.58	0.00861	0.0229	0.0493	0.152	0.0518	0.127	0.246	0.00293	0.00778	0.0171	0.616	0.37	0.685	0.433	0.59	0.013	0.0346	0.0685	0.16	0.0741	0.187	0.299	0.00364	0.00886	0.02	0.661	0.488	0.725	FALSE	FALSE	FALSE
O75821	EIF3G	-0.197	-0.00939	0.0187	-0.689	0.0062	0.187	0.215	-0.493	0.203	0.0281	-0.68	0.0156	-0.708	-0.0125	0.696	5.75e-05	0.783	0.584	3.65e-11	0.855	9.11e-05	2.37e-05	2.23e-09	4.27e-05	0.415	4.33e-11	0.648	2.62e-11	0.713	3.27e-11	0.000206	0.79	0.629	4.44e-10	0.881	0.000116	5.99e-05	2.33e-08	0.000104	0.434	1.26e-10	0.666	3.33e-10	0.792	3.9e-10	FALSE	FALSE	FALSE
O95628	CNOT4	NA	NA	NA	NA	NA	NA	NA	NA	NA	0.176	NA	NA	NA	NA	NA	NA	NA	NA	NA	NA	NA	NA	NA	NA	0.00615	NA	NA	NA	NA	NA	NA	NA	NA	NA	NA	NA	NA	NA	NA	0.00745	NA	NA	NA	NA	NA	FALSE	FALSE	FALSE
P11940	PABPC1	-0.0461	0.867	0.209	0.176	0.285	0.913	0.255	0.222	0.331	-0.658	-0.692	-0.582	-0.0332	0.0762	0.109	0.0203	5.83e-16	2.66e-08	1.98e-07	6.39e-10	3.03e-16	2.46e-09	1.31e-08	1.02e-10	1.89e-14	1.02e-14	8.91e-14	0.079	0.000788	3.1e-05	0.0363	3.28e-15	9.91e-08	8.07e-07	4.05e-09	2.29e-15	1.5e-08	1.08e-07	8.36e-10	1.18e-13	5.6e-14	4.51e-13	0.107	0.00324	7.89e-05	FALSE	FALSE	FALSE
P31942	HNRNPH3	-0.32	0.0842	0.115	-0.423	0.312	0.404	0.435	-0.103	0.632	0.0304	-0.507	0.228	-0.537	0.197	0.735	1.13e-07	0.0158	0.00233	4.28e-09	1.52e-07	7.31e-09	3.07e-09	0.00492	3.16e-11	0.333	4.76e-10	4.89e-06	2.33e-10	2.13e-05	4.87e-12	9.3e-07	0.0171	0.00385	2.67e-08	5.76e-07	1.41e-08	1.8e-08	0.0107	2.98e-10	0.352	1.16e-09	8.16e-06	2.18e-09	0.000161	7.61e-11	FALSE	FALSE	FALSE
P38159	RBMX	-0.046	0.937	0.0626	0.233	0.15	0.983	0.109	0.279	0.196	-0.874	-0.703	-0.786	0.171	0.0876	-0.0832	0.0205	2.15e-16	0.00331	6.91e-09	1.11e-06	1.17e-16	3.27e-05	7.92e-10	5.37e-08	5.17e-16	8.08e-15	1.97e-15	2.64e-07	0.000241	0.000375	0.0365	1.37e-15	0.00532	4.02e-08	3.5e-06	1.02e-15	8.09e-05	9.4e-09	2.3e-07	4.81e-15	4.57e-14	1.51e-14	1.05e-06	0.00119	0.00077	FALSE	FALSE	FALSE
P49792	RANBP2	0.1	-0.585	-0.773	-0.245	-0.67	-0.686	-0.873	-0.345	-0.771	-0.188	0.34	-0.0851	0.528	0.103	-0.425	0.00172	9.33e-12	2.88e-13	3.22e-07	1.72e-12	1.3e-12	6.2e-14	5.92e-09	2.99e-13	5.88e-06	7.11e-09	0.00532	3.35e-11	0.00144	4.79e-10	0.0041	2.36e-11	3.63e-12	1.27e-06	1.95e-11	4.37e-12	1.31e-12	5.36e-08	4.98e-12	9.74e-06	1.47e-08	0.00645	4.13e-10	0.00537	3.83e-09	FALSE	FALSE	FALSE
P51991	HNRNPA3	-0.453	0.169	-0.468	-0.757	-0.254	0.622	-0.0146	-0.304	0.199	-0.637	-0.926	-0.423	-0.289	0.214	0.503	2.29e-11	2.56e-06	1.55e-11	3.74e-14	2.58e-08	4.38e-13	0.502	3.08e-09	4.22e-07	3.28e-13	2.94e-15	5.37e-11	5.56e-09	1.9e-07	6.29e-12	8.54e-10	3.51e-06	1.23e-10	1.23e-12	1.15e-07	1.61e-12	0.566	3.09e-08	1.51e-06	1.55e-12	1.85e-14	1.69e-10	3.33e-08	3.07e-06	9.51e-11	FALSE	FALSE	FALSE
P52756	RBM5	-0.546	-0.131	-0.203	-0.173	0.00474	0.416	0.343	0.373	0.551	-0.0723	-0.0426	0.135	0.0296	0.208	0.178	1.4e-08	0.00992	0.000438	0.00153	0.914	3.31e-07	2.72e-06	1.11e-06	1.26e-08	0.118	0.341	0.00805	0.504	0.00036	0.00125	1.64e-07	0.0109	0.000813	0.00289	0.929	5.31e-07	8.32e-06	5.48e-06	6.26e-08	0.13	0.354	0.00962	0.558	0.00166	0.00231	FALSE	FALSE	FALSE
P55884	EIF3B	-0.173	-0.567	0.0917	-0.592	0.205	-0.394	0.264	-0.42	0.377	0.658	-0.0259	0.771	-0.684	0.113	0.797	1.18e-05	1.13e-11	0.0029	6.5e-12	1.96e-06	9.94e-10	1.12e-07	4.58e-10	1.66e-09	1.75e-12	0.319	2.4e-13	1.08e-12	0.000595	1.58e-13	5.16e-05	2.84e-11	0.00471	9.95e-11	5.82e-06	2.17e-09	4.61e-07	5.87e-09	1e-08	7.15e-12	0.331	1.14e-12	2.19e-11	0.00257	4.2e-12	FALSE	FALSE	FALSE
Q06787	FMR1	-0.0989	-0.177	-0.745	-0.0657	-0.727	-0.078	-0.646	0.0332	-0.628	-0.568	0.111	-0.55	0.679	0.0176	-0.662	0.148	0.0166	3.9e-08	0.325	5.15e-08	0.246	2.02e-07	0.613	2.76e-07	8.58e-07	0.107	1.21e-06	1.14e-07	0.789	1.54e-07	0.205	0.018	1.41e-07	0.383	2.17e-07	0.255	7.79e-07	0.694	1.02e-06	1.58e-06	0.114	2.16e-06	4.97e-07	0.849	6.39e-07	FALSE	FALSE	FALSE
Q13310	PABPC4	-0.0254	0.959	0.126	0.17	0.141	0.984	0.151	0.195	0.167	-0.833	-0.789	-0.818	0.0444	0.0156	-0.0288	0.295	6.2e-15	0.000127	6.52e-06	4.22e-05	4.46e-15	2.19e-05	1.48e-06	8.05e-06	3.65e-14	7.27e-14	4.63e-14	0.0787	0.513	0.238	0.369	2.73e-14	0.000255	1.96e-05	9.94e-05	2.55e-14	5.58e-05	7.08e-06	2.23e-05	2.11e-13	3.37e-13	2.51e-13	0.107	0.623	0.285	FALSE	FALSE	FALSE
Q14151	SAFB2	-0.0283	-0.0924	-0.00876	-0.137	0.081	-0.0641	0.0195	-0.108	0.109	0.0836	-0.0444	0.173	-0.128	0.0897	0.218	0.791	0.393	0.935	0.214	0.453	0.551	0.855	0.319	0.315	0.438	0.678	0.122	0.243	0.407	0.0581	0.835	0.403	0.946	0.264	0.512	0.561	0.88	0.405	0.373	0.457	0.689	0.133	0.293	0.523	0.08	FALSE	FALSE	FALSE
Q15287	RNPS1	0.305	-0.172	0.0124	0.814	-0.106	-0.477	-0.292	0.509	-0.411	0.184	0.986	0.0658	0.801	-0.119	-0.92	0.00362	0.0663	0.887	3.88e-07	0.238	9.9e-05	0.00476	5.33e-05	0.00037	0.0511	4.3e-08	0.456	4.61e-07	0.19	9.59e-08	0.00787	0.0703	0.905	1.49e-06	0.286	0.000125	0.00831	0.000181	0.000768	0.0578	8.07e-08	0.474	1.74e-06	0.294	4.14e-07	FALSE	FALSE	FALSE
Q15424	SAFB	-0.491	-0.246	-0.437	-0.106	-0.282	0.245	0.0541	0.384	0.209	-0.191	0.139	-0.0362	0.33	0.155	-0.175	9.71e-10	2.9e-06	3.97e-09	0.00459	6.46e-07	2.94e-06	0.105	1.82e-08	1.55e-05	3.78e-05	0.000651	0.265	1.07e-07	0.000262	8.64e-05	1.78e-08	3.96e-06	1.78e-08	0.008	2.16e-06	4.24e-06	0.141	1.44e-07	4.1e-05	5.66e-05	0.000797	0.282	4.71e-07	0.00127	0.0002	FALSE	FALSE	FALSE
Q17RY0	CPEB4	-0.599	NA	-0.562	NA	NA	NA	0.0379	NA	NA	NA	NA	NA	NA	NA	NA	0.0286	NA	0.0251	NA	NA	NA	0.664	NA	NA	NA	NA	NA	NA	NA	NA	0.049	NA	0.0352	NA	NA	NA	0.718	NA	NA	NA	NA	NA	NA	NA	NA	FALSE	FALSE	FALSE
Q32P51	HNRNPA1L2	NA	NA	NA	NA	NA	0.28	-0.00825	-0.0238	0.352	-0.288	-0.303	0.0728	-0.0156	0.361	0.376	NA	NA	NA	NA	NA	0.347	0.978	0.934	0.27	0.231	0.166	0.749	0.945	0.177	0.13	NA	NA	NA	NA	NA	0.358	0.983	0.951	0.324	0.248	0.176	0.763	0.954	0.278	0.166	FALSE	FALSE	FALSE
Q58A45	PAN3	0.0345	0.15	0.2	0.38	0.208	0.115	0.166	0.346	0.174	0.0507	0.231	0.0584	0.18	0.00769	-0.172	0.823	0.339	0.207	0.0258	0.191	0.459	0.291	0.0395	0.271	0.742	0.151	0.705	0.254	0.96	0.274	0.862	0.348	0.248	0.0386	0.235	0.47	0.35	0.068	0.325	0.755	0.16	0.721	0.305	0.971	0.324	FALSE	FALSE	FALSE
Q5BKZ1	ZNF326	0.00382	NA	0.368	0.0722	0.294	NA	0.364	0.0684	0.29	NA	NA	NA	-0.296	-0.0744	0.221	0.986	NA	0.114	0.742	0.197	NA	0.117	0.755	0.203	NA	NA	NA	0.194	0.734	0.323	0.989	NA	0.143	0.787	0.242	NA	0.155	0.814	0.251	NA	NA	NA	0.241	0.809	0.373	FALSE	FALSE	FALSE
Q5T8P6	RBM26	0.049	0.0177	-0.069	-0.369	0.129	-0.0314	-0.118	-0.418	0.0802	-0.0866	-0.387	0.112	-0.3	0.198	0.498	0.0371	0.417	0.00619	2.76e-10	3.93e-05	0.161	9.3e-05	5.95e-11	0.00226	0.00128	1.56e-10	0.000156	3.39e-09	4.33e-07	6.77e-12	0.0618	0.427	0.00953	2.5e-09	9.32e-05	0.169	0.000212	1.03e-09	0.00411	0.00164	4.07e-10	0.000219	2.17e-08	6.05e-06	1.01e-10	FALSE	FALSE	FALSE
Q5TC82	RC3H1	0.654	-0.273	0.205	0.0263	0.143	-0.927	-0.45	-0.628	-0.511	0.478	0.299	0.416	-0.179	-0.0613	0.117	0.0975	0.468	0.584	0.944	0.7	0.0149	0.192	0.0778	0.143	0.168	0.376	0.225	0.593	0.854	0.725	0.144	0.478	0.629	0.953	0.743	0.0164	0.242	0.122	0.183	0.182	0.39	0.241	0.641	0.896	0.761	FALSE	FALSE	FALSE
Q6XE24	RBMS3	-0.129	-0.0625	-0.605	-0.459	-0.642	0.0666	-0.476	-0.33	-0.513	-0.543	-0.396	-0.58	0.146	-0.037	-0.183	0.0959	0.4	1.46e-06	2.62e-05	7.59e-07	0.371	1.81e-05	0.00053	8.44e-06	4.7e-06	0.000106	2.33e-06	0.0628	0.615	0.0243	0.142	0.409	3.94e-06	6.93e-05	2.5e-06	0.382	4.71e-05	0.00146	2.33e-05	7.87e-06	0.000139	4.03e-06	0.0869	0.711	0.036	FALSE	FALSE	FALSE
Q6ZRY4	RBPMS2	-0.184	0.764	0.138	0.233	-0.000642	0.948	0.322	0.416	0.183	-0.626	-0.531	-0.764	0.0945	-0.139	-0.233	0.281	0.000463	0.414	0.179	0.997	6.78e-05	0.0711	0.0247	0.283	0.00218	0.00651	0.00046	0.573	0.412	0.178	0.355	0.000543	0.464	0.224	0.998	8.7e-05	0.0982	0.0448	0.339	0.00274	0.00744	0.000618	0.623	0.528	0.22	FALSE	FALSE	FALSE
Q76FK4	NOL8	0.294	NA	0.65	0.372	0.55	NA	0.356	0.0784	0.256	NA	NA	NA	-0.277	-0.0995	0.178	6.44e-05	NA	3.27e-08	7.73e-06	1.76e-07	NA	1.18e-05	0.121	0.000204	NA	NA	NA	0.000106	0.0566	0.00298	0.000227	NA	1.2e-07	2.29e-05	6.54e-07	NA	3.15e-05	0.179	0.000442	NA	NA	NA	0.00025	0.113	0.00515	FALSE	FALSE	FALSE
Q7Z6E9	RBBP6	0.06	-0.00611	0.16	0.292	0.0671	-0.0661	0.0996	0.232	0.00718	0.166	0.298	0.0732	0.132	-0.0924	-0.224	0.389	0.929	0.0341	0.000846	0.336	0.344	0.163	0.00447	0.917	0.0288	0.000717	0.296	0.0718	0.193	0.00548	0.466	0.93	0.0466	0.00167	0.394	0.355	0.208	0.00983	0.928	0.0331	0.000874	0.314	0.0981	0.298	0.00905	FALSE	FALSE	FALSE
Q86U38	NOP9	0.0381	0.459	0.115	-0.0314	-0.529	0.421	0.0769	-0.0695	-0.567	-0.344	-0.491	-0.988	-0.146	-0.644	-0.497	0.769	0.0032	0.381	0.808	0.00115	0.00566	0.555	0.593	0.000666	0.0179	0.00201	3.43e-06	0.269	0.000228	0.00183	0.817	0.00359	0.432	0.843	0.00216	0.0064	0.616	0.676	0.00132	0.021	0.00237	5.83e-06	0.321	0.00114	0.00328	FALSE	FALSE	FALSE
Q86U42	PABPN1	-0.446	-0.471	-0.394	-0.608	-0.206	-0.025	0.0517	-0.162	0.24	0.0767	-0.137	0.265	-0.214	0.188	0.402	1.79e-08	9.36e-09	7.55e-08	4.28e-10	7.61e-05	0.499	0.175	0.000618	1.69e-05	0.053	0.00223	6.12e-06	5.3e-05	0.000171	5.98e-08	1.99e-07	1.62e-08	2.59e-07	3.67e-09	0.000171	0.51	0.222	0.00168	4.44e-05	0.0598	0.00262	1.01e-05	0.000132	0.0009	2.72e-07	FALSE	FALSE	FALSE
Q8IY57	YAF2	NA	NA	NA	NA	NA	NA	NA	NA	NA	NA	NA	0.385	NA	NA	NA	NA	NA	NA	NA	NA	NA	NA	NA	NA	NA	NA	0.000766	NA	NA	NA	NA	NA	NA	NA	NA	NA	NA	NA	NA	NA	NA	0.00101	NA	NA	NA	FALSE	FALSE	FALSE
Q8N567	ZCCHC9	0.178	NA	0.725	0.499	0.475	NA	0.547	0.321	0.297	NA	NA	NA	-0.226	-0.25	-0.0235	0.275	NA	0.00072	0.00844	0.011	NA	0.0049	0.0635	0.0821	NA	NA	NA	0.173	0.136	0.883	0.349	NA	0.00129	0.0139	0.0174	NA	0.00853	0.103	0.111	NA	NA	NA	0.217	0.224	0.898	FALSE	FALSE	FALSE
Q8N9N2	ASCC1	-0.22	0.624	0.0391	0.392	-0.19	0.844	0.26	0.612	0.03	-0.585	-0.232	-0.814	0.353	-0.23	-0.582	0.213	0.00272	0.82	0.037	0.278	0.000251	0.147	0.0031	0.861	0.00423	0.192	0.000343	0.0566	0.196	0.00434	0.281	0.00307	0.847	0.0539	0.332	0.000309	0.19	0.00711	0.882	0.0052	0.202	0.000467	0.0793	0.301	0.0073	FALSE	FALSE	FALSE
Q8NBF2	NHLRC2	-0.647	-0.688	-0.595	-0.726	NA	-0.0411	0.0523	-0.0786	NA	0.0934	-0.0375	NA	-0.131	NA	NA	0.00227	0.00174	0.00737	0.00328	NA	0.615	0.65	0.501	NA	0.429	0.743	NA	0.37	NA	NA	0.00525	0.00199	0.0112	0.0059	NA	0.624	0.704	0.592	NA	0.448	0.752	NA	0.426	NA	NA	FALSE	FALSE	FALSE
Q8TB72	PUM2	-0.0489	-0.644	0.0332	0.172	-0.156	-0.595	0.0821	0.221	-0.107	0.677	0.816	0.488	0.139	-0.189	-0.328	0.411	5.97e-08	0.575	0.0107	0.0181	1.49e-07	0.178	0.00213	0.0859	3.32e-08	3.63e-09	1.37e-06	0.0316	0.00604	7.92e-05	0.488	9.5e-08	0.62	0.0173	0.0275	2.47e-07	0.225	0.00509	0.115	7.21e-08	7.84e-09	2.44e-06	0.0468	0.0176	0.000185	FALSE	FALSE	FALSE
Q92667	AKAP1	-0.814	-2.04	-1.39	-1.53	-1.23	-1.23	-0.581	-0.715	-0.417	0.645	0.511	0.809	-0.134	0.163	0.297	0.234	0.00948	0.0483	0.0428	0.0882	0.0323	0.253	0.204	0.442	0.165	0.31	0.125	0.783	0.738	0.58	0.305	0.0104	0.0644	0.0613	0.117	0.0351	0.309	0.279	0.502	0.179	0.323	0.137	0.815	0.812	0.63	FALSE	FALSE	FALSE
Q96E39	RBMXL1	-0.423	-0.37	-0.327	-0.0342	0.364	0.0527	0.0956	0.389	0.786	0.0429	0.336	0.734	0.293	0.691	0.398	0.00155	0.00396	0.00859	0.751	0.00447	0.626	0.382	0.00284	5.46e-06	0.691	0.00734	1.12e-05	0.0159	2.06e-05	0.00242	0.00374	0.00444	0.013	0.793	0.00752	0.635	0.444	0.00659	1.57e-05	0.706	0.00838	1.79e-05	0.0249	0.000157	0.00424	FALSE	FALSE	FALSE
Q96T37	RBM15	-0.0536	0.653	-0.23	-0.279	-0.262	0.706	-0.176	-0.226	-0.209	-0.883	-0.932	-0.915	-0.0496	-0.0326	0.017	0.00844	1.85e-14	7.55e-09	7.15e-10	1.53e-09	6.82e-15	1.69e-07	9.3e-09	2.35e-08	4.09e-16	2.04e-16	2.58e-16	0.0131	0.0812	0.342	0.0165	7.29e-14	3.18e-08	5.61e-09	8.82e-09	3.66e-14	6.66e-07	8e-08	1.09e-07	3.92e-15	1.81e-15	2.48e-15	0.0208	0.15	0.394	FALSE	FALSE	FALSE
Q96T58	SPEN	0.228	0.556	0.163	0.484	-0.0741	0.328	-0.065	0.257	-0.302	-0.393	-0.0719	-0.63	0.322	-0.237	-0.558	0.005	1.79e-06	0.0313	7.8e-06	0.29	0.000316	0.351	0.00221	0.000641	6.15e-05	0.304	4.5e-07	0.000378	0.00387	1.71e-06	0.0105	2.49e-06	0.0431	2.31e-05	0.345	0.000386	0.413	0.00529	0.00128	8.99e-05	0.317	8.49e-07	0.00081	0.0122	5.69e-06	FALSE	FALSE	FALSE
Q9P2K5	MYEF2	-0.0814	-0.438	-0.326	0.194	-0.338	-0.357	-0.244	0.275	-0.256	0.113	0.632	0.101	0.519	-0.012	-0.531	0.0381	1.69e-08	5.21e-07	0.00011	3.47e-07	1.84e-07	1.14e-05	3.31e-06	6.97e-06	0.00704	2.05e-10	0.0135	2.24e-09	0.739	1.7e-09	0.0633	2.84e-08	1.51e-06	0.000258	1.23e-06	3.03e-07	3.06e-05	1.47e-05	1.95e-05	0.00848	5.25e-10	0.0158	1.5e-08	0.813	1.17e-08	FALSE	FALSE	FALSE
Q9P2N5	RBM27	-0.0544	-0.684	-0.534	-0.341	-0.317	-0.63	-0.479	-0.287	-0.263	0.15	0.343	0.367	0.192	0.217	0.0243	0.165	1.41e-10	2.88e-09	5.28e-07	1.2e-06	3.88e-10	1.04e-08	3.53e-06	8.91e-06	0.00138	5.05e-07	2.34e-07	0.000181	6.05e-05	0.523	0.225	3.02e-10	1.33e-08	1.98e-06	3.75e-06	8.96e-10	5.43e-08	1.55e-05	2.45e-05	0.00177	8.36e-07	4.55e-07	0.00041	0.000379	0.575	FALSE	FALSE	FALSE
Q9UDW3	ZMAT5	-0.164	NA	-0.409	0.456	-0.235	NA	-0.244	0.62	-0.0705	NA	NA	NA	0.864	0.174	-0.691	0.307	NA	0.0224	0.013	0.155	NA	0.14	0.00204	0.655	NA	NA	NA	0.000167	0.282	0.000956	0.382	NA	0.0316	0.0207	0.195	NA	0.182	0.0049	0.701	NA	NA	NA	0.000382	0.397	0.00182	FALSE	FALSE	FALSE
Q9UN86	G3BP2	-0.117	-0.0104	-0.295	0.0845	-0.396	0.107	-0.178	0.202	-0.279	-0.285	0.0948	-0.386	0.38	-0.101	-0.481	0.000112	0.635	4.75e-09	0.00168	1.34e-10	0.000256	1.58e-06	4.08e-07	9.37e-09	7.27e-09	0.000688	1.86e-10	2.25e-10	0.000419	1.23e-11	0.000372	0.644	2.1e-08	0.00316	9.87e-10	0.000315	5.09e-06	2.26e-06	4.79e-08	1.73e-08	0.000842	5.44e-10	2.11e-09	0.00191	1.68e-10	FALSE	FALSE	FALSE
Q9UNP9	PPIE	-0.155	-0.0903	-0.0313	-0.0779	-0.135	0.0647	0.124	0.0771	0.0196	0.059	0.0124	-0.0451	-0.0466	-0.104	-0.0575	0.061	0.253	0.685	0.321	0.0964	0.407	0.126	0.326	0.799	0.449	0.872	0.56	0.548	0.191	0.46	0.0953	0.262	0.726	0.378	0.126	0.418	0.165	0.412	0.826	0.468	0.878	0.579	0.599	0.296	0.514	FALSE	FALSE	FALSE
Q9UPU9	SAMD4A	-0.0352	-0.205	0.239	0.685	0.237	-0.17	0.274	0.72	0.272	0.444	0.89	0.442	0.446	-0.00186	-0.448	0.837	0.243	0.178	0.00133	0.181	0.329	0.126	0.000906	0.129	0.0203	0.000151	0.0208	0.0198	0.991	0.0193	0.874	0.252	0.217	0.00255	0.224	0.34	0.166	0.00235	0.167	0.0237	0.000195	0.0241	0.0303	0.995	0.029	FALSE	FALSE	FALSE
Q9Y4F3	MARF1	-0.203	0.385	-0.103	-0.102	0.0593	0.588	0.0998	0.101	0.262	-0.488	-0.487	-0.326	0.00113	0.162	0.161	0.193	0.0221	0.498	0.502	0.695	0.00164	0.512	0.507	0.0999	0.00586	0.00595	0.0465	0.994	0.292	0.295	0.258	0.0238	0.548	0.561	0.738	0.00191	0.575	0.597	0.132	0.00711	0.00682	0.0526	0.996	0.409	0.345	FALSE	FALSE	FALSE
O00148	DDX39A	-0.453	-3.7	-0.339	-0.227	-0.0239	-3.25	0.114	0.226	0.429	3.37	3.48	3.68	0.112	0.315	0.203	2.74e-09	9.66e-21	8.53e-08	7.16e-06	0.458	5.07e-20	0.00297	7.32e-06	5.26e-09	3.27e-20	2.16e-20	1.05e-20	0.00342	1.98e-07	2.23e-05	4.3e-08	3.24e-19	2.88e-07	2.14e-05	0.516	1.74e-18	0.00538	3.02e-05	2.82e-08	1.98e-18	1.13e-18	6.79e-19	0.00608	3.17e-06	5.85e-05	FALSE	TRUE	FALSE
O14497	ARID1A	-0.52	-1.74	0.0427	-0.928	0.0384	-1.22	0.563	-0.408	0.559	1.79	0.814	1.78	-0.971	-0.00434	0.966	2.54e-07	1.04e-13	0.433	2.65e-10	0.48	8.85e-12	1.03e-07	3.74e-06	1.13e-07	7.69e-14	1.3e-09	7.93e-14	1.53e-10	0.936	1.61e-10	1.89e-06	3.59e-13	0.484	2.41e-09	0.538	2.59e-11	4.28e-07	1.63e-05	4.51e-07	4.12e-13	2.99e-09	4.05e-13	1.51e-09	0.955	1.51e-09	FALSE	TRUE	FALSE
O43143	DHX15	-0.691	0.586	0.0694	-0.279	0.0424	1.28	0.761	0.412	0.734	-0.517	-0.865	-0.544	-0.349	-0.027	0.322	2.12e-14	1.69e-13	0.00245	1.64e-09	0.0391	8.96e-18	6.34e-15	1.39e-11	1e-14	8.24e-13	1.24e-15	4.35e-13	1.09e-10	0.167	2.94e-10	3.83e-12	5.61e-13	0.00403	1.14e-08	0.0558	1.1e-16	1.81e-13	3.15e-10	2.75e-13	3.63e-12	8.65e-15	1.95e-12	1.15e-09	0.264	2.52e-09	FALSE	FALSE	FALSE
O43172	PRPF4	0.25	0.849	0.333	-0.23	0.283	0.599	0.0825	-0.48	0.0324	-0.516	-1.08	-0.567	-0.563	-0.0501	0.513	3.61e-07	1.31e-13	1.33e-08	9.45e-07	9e-08	1.04e-11	0.00785	1.59e-10	0.238	6.52e-11	6.42e-15	2.07e-11	2.25e-11	0.0785	7.13e-11	2.57e-06	4.44e-13	5.34e-08	3.35e-06	3.6e-07	3.03e-11	0.0132	2.34e-09	0.29	2.08e-10	3.72e-14	6.94e-11	2.9e-10	0.146	7.41e-10	FALSE	FALSE	FALSE
O43290	SART1	0.24	1.44	0.179	-0.339	0.205	1.2	-0.0606	-0.579	-0.0348	-1.26	-1.77	-1.23	-0.519	0.0259	0.545	9.61e-08	2.32e-17	2.49e-06	1.58e-09	5.68e-07	2.35e-16	0.018	2.16e-12	0.144	1.26e-16	1.57e-18	1.64e-16	8.59e-12	0.268	4.68e-12	8.13e-07	1.93e-16	6.56e-06	1.1e-08	1.92e-06	1.86e-15	0.0281	6.38e-11	0.185	1.39e-15	2.83e-17	1.69e-15	1.26e-10	0.382	7.53e-11	FALSE	TRUE	FALSE
O75533	SF3B1	-0.19	0.394	0.092	-0.989	0.282	0.584	0.282	-0.799	0.473	-0.302	-1.38	-0.112	-1.08	0.19	1.27	3.29e-06	7.37e-10	0.00238	7.68e-15	3.96e-08	5.7e-12	3.93e-08	1.14e-13	7.89e-11	1.8e-08	1.11e-16	0.000541	2.5e-15	3.32e-06	3.21e-16	1.68e-05	1.45e-09	0.00393	3.71e-13	1.71e-07	1.72e-11	1.8e-07	5.19e-12	6.61e-10	4.02e-08	1.04e-15	0.000723	1.22e-13	3.39e-05	2.34e-14	FALSE	FALSE	FALSE
O75934	BCAS2	-0.212	1.29	-0.156	-0.151	0.0908	1.5	0.0567	0.0617	0.303	-1.45	-1.44	-1.2	0.00495	0.247	0.242	0.000136	1.21e-13	0.00175	0.00222	0.0392	1.77e-14	0.175	0.143	4.01e-06	2.88e-14	3.01e-14	3.03e-13	0.902	3.33e-05	4.05e-05	0.000438	4.11e-13	0.00296	0.00409	0.0558	8.71e-14	0.222	0.207	1.18e-05	1.71e-13	1.52e-13	1.41e-12	0.92	0.000231	0.000101	FALSE	TRUE	FALSE
O75937	DNAJC8	-0.641	-2.09	-0.589	-1.52	-0.205	-1.45	0.0515	-0.883	0.436	1.5	0.567	1.89	-0.934	0.384	1.32	3.71e-09	1.52e-15	1.01e-08	8.23e-14	0.000599	1.54e-13	0.276	7.47e-11	3.35e-07	9.94e-14	1.61e-08	5.61e-15	3.71e-11	1.35e-06	5.06e-13	5.51e-08	7.72e-15	4.12e-08	2.43e-12	0.00117	6.12e-13	0.334	1.22e-09	1.23e-06	5.24e-13	3.17e-08	3.71e-14	4.51e-10	1.58e-05	1.16e-11	FALSE	TRUE	FALSE
O94906	PRPF6	0.209	0.946	0.137	-0.151	0.201	0.737	-0.072	-0.361	-0.00801	-0.809	-1.1	-0.745	-0.289	0.064	0.353	3.78e-08	2.94e-16	4.23e-06	1.52e-06	5.95e-08	6.96e-15	0.00157	5.34e-11	0.664	2.14e-15	4.5e-17	6.07e-15	8.2e-10	0.00362	7.05e-11	3.75e-07	1.8e-15	1.07e-05	5.19e-06	2.47e-07	3.72e-14	0.00296	9.43e-10	0.708	1.7e-14	4.74e-16	3.97e-14	6.29e-09	0.0115	7.34e-10	FALSE	FALSE	FALSE
O95232	LUC7L3	0.168	2.04	0.309	0.365	0.364	1.88	0.141	0.197	0.196	-1.74	-1.68	-1.68	0.0565	0.0555	-0.00103	1.02e-05	6.31e-19	1.13e-08	1.5e-09	1.55e-09	1.88e-18	5.92e-05	1.88e-06	1.99e-06	5.05e-18	7.68e-18	7.62e-18	0.035	0.0379	0.966	4.55e-05	8.67e-18	4.55e-08	1.06e-08	8.9e-09	2.91e-17	0.000139	8.86e-06	6.22e-06	1.01e-16	1.04e-16	1.19e-16	0.0513	0.0815	0.971	FALSE	TRUE	FALSE
P09234	SNRPC	0.382	3.06	0.517	0.782	0.0716	2.68	0.134	0.4	-0.311	-2.55	-2.28	-2.99	0.266	-0.445	-0.711	6.71e-05	1.4e-15	3.19e-06	2.98e-08	0.297	7.52e-15	0.0625	4.32e-05	0.000428	1.44e-14	5.78e-14	1.88e-15	0.00148	1.51e-05	9.1e-08	0.000236	7.19e-15	8.27e-06	1.48e-07	0.352	4.01e-14	0.0875	0.00015	0.000879	9.35e-14	2.75e-13	1.45e-14	0.00282	0.000121	3.96e-07	FALSE	TRUE	FALSE
P09661	SNRPA1	-0.187	0.169	0.0422	-1.24	0.166	0.356	0.23	-1.05	0.353	-0.127	-1.41	-0.00335	-1.28	0.123	1.41	2.29e-05	6.29e-05	0.169	3.79e-15	7.6e-05	1.93e-08	2.8e-06	2.99e-14	2.16e-08	0.000777	7.57e-16	0.91	2.49e-15	0.00096	7.8e-16	9.36e-05	7.78e-05	0.207	2.1e-13	0.000171	3.52e-08	8.51e-06	1.66e-12	1.01e-07	0.00102	5.57e-15	0.918	1.22e-13	0.00379	5.1e-14	FALSE	FALSE	FALSE
P17844	DDX5	-0.246	0.618	-0.488	-0.377	-0.375	0.864	-0.243	-0.131	-0.13	-1.11	-0.995	-0.993	0.111	0.113	0.00148	6.56e-11	6.23e-16	1.22e-14	3.18e-13	3.34e-13	8.95e-18	7.69e-11	1.23e-07	1.4e-07	3.87e-19	1.49e-18	1.52e-18	7.67e-07	6.62e-07	0.907	1.94e-09	3.48e-15	2.27e-13	7.63e-12	4.51e-12	1.1e-16	6.76e-10	7.79e-07	5.51e-07	1.25e-17	2.7e-17	3.35e-17	2.79e-06	8.52e-06	0.919	FALSE	FALSE	FALSE
P28370	SMARCA1	NA	NA	NA	NA	NA	-1.29	-0.377	-1.04	-0.722	0.911	0.251	0.566	-0.66	-0.344	0.315	NA	NA	NA	NA	NA	2.64e-06	0.0241	1.98e-05	0.000422	6.24e-05	0.11	0.00243	0.00083	0.036	0.0512	NA	NA	NA	NA	NA	3.83e-06	0.0368	7.4e-05	0.000867	9.12e-05	0.117	0.00305	0.00167	0.0783	0.071	FALSE	FALSE	FALSE
P62306	SNRPF	0.444	2.47	0.555	1.07	0.486	2.03	0.111	0.623	0.0418	-1.92	-1.4	-1.99	0.511	-0.0693	-0.581	5.32e-05	1.02e-13	5.63e-06	3.34e-09	2.21e-05	1.23e-12	0.161	1.66e-06	0.585	2.49e-12	1.17e-10	1.6e-12	1.32e-05	0.371	3.51e-06	0.000194	3.53e-13	1.4e-05	2.14e-08	5.44e-05	4.17e-12	0.206	7.85e-06	0.64	9.89e-12	3.13e-10	6.39e-12	3.67e-05	0.489	1.08e-05	FALSE	TRUE	FALSE
P62314	SNRPD1	0.151	1.04	0.363	0.19	0.0582	0.886	0.212	0.0389	-0.0928	-0.674	-0.847	-0.978	-0.173	-0.305	-0.132	7.13e-05	1.07e-14	4.78e-09	7.31e-06	0.045	7.79e-14	2.28e-06	0.162	0.00372	2.41e-12	1.37e-13	2.22e-14	1.89e-05	3.79e-08	0.000247	0.000248	4.47e-14	2.11e-08	2.18e-05	0.0632	3.36e-13	7.06e-06	0.229	0.00653	9.62e-12	6.05e-13	1.29e-13	5.09e-05	8.01e-07	0.000526	FALSE	TRUE	FALSE
P62316	SNRPD2	0.363	1.14	0.502	0.217	0.23	0.778	0.139	-0.146	-0.133	-0.638	-0.924	-0.91	-0.285	-0.272	0.0134	7.52e-09	5.16e-15	1.47e-10	2.66e-06	1.39e-06	6.42e-13	0.000211	0.000138	0.000324	7.55e-12	7.39e-14	8.88e-14	1.27e-07	2.2e-07	0.63	9.72e-08	2.32e-14	8.85e-10	8.61e-06	4.31e-06	2.29e-12	0.000454	0.00043	0.000681	2.78e-11	3.42e-13	4.5e-13	5.5e-07	3.47e-06	0.676	FALSE	TRUE	FALSE
P62318	SNRPD3	0.563	2.21	1.01	0.197	0.549	1.65	0.445	-0.366	-0.0142	-1.2	-2.01	-1.66	-0.81	-0.459	0.351	0.000128	2.59e-11	3.13e-07	0.0808	0.000162	9.59e-10	0.00095	0.00392	0.893	4.1e-08	8.24e-11	8.64e-10	3.44e-06	0.00074	0.00509	0.000417	6.17e-11	9.41e-07	0.11	0.000346	2.1e-09	0.00185	0.00877	0.909	8.78e-08	2.28e-10	2.31e-09	1.08e-05	0.0031	0.00845	FALSE	TRUE	TRUE
Q00839	HNRNPU	-0.376	1.25	-0.00678	-0.297	0.186	1.62	0.369	0.0797	0.562	-1.25	-1.54	-1.06	-0.29	0.192	0.482	2.51e-10	7.51e-17	0.755	4.51e-09	1.01e-06	2.65e-18	3.14e-10	0.00254	1.74e-12	7.01e-17	5.03e-18	5.78e-16	5.95e-09	6.81e-07	1.18e-11	6.11e-09	5.5e-16	0.79	2.78e-08	3.24e-06	3.94e-17	2.38e-09	0.00597	2.33e-11	8.45e-16	7.26e-17	4.96e-15	3.53e-08	8.69e-06	1.64e-10	FALSE	TRUE	FALSE
Q08211	DHX9	0.212	1.82	0.224	0.206	0.234	1.61	0.012	-0.00605	0.0222	-1.6	-1.62	-1.59	-0.018	0.0103	0.0283	3.22e-07	8.95e-19	1.73e-07	4.46e-07	1.03e-07	4.3e-18	0.595	0.787	0.33	4.73e-18	4.1e-18	5.13e-18	0.427	0.648	0.221	2.32e-06	1.15e-17	5.48e-07	1.7e-06	4.08e-07	5.97e-17	0.654	0.839	0.388	9.74e-17	6.18e-17	8.7e-17	0.482	0.738	0.267	FALSE	TRUE	FALSE
Q09161	NCBP1	0.269	2.94	0.735	0.769	0.647	2.67	0.467	0.5	0.378	-2.2	-2.17	-2.29	0.0338	-0.0888	-0.123	5.93e-07	8.56e-20	3.38e-12	1.93e-12	1.67e-11	2.9e-19	9.26e-10	3.96e-10	1.17e-08	3.33e-18	4.05e-18	2.01e-18	0.272	0.0101	0.00115	3.93e-06	1.8e-18	3.11e-11	3.54e-11	1.49e-10	6.59e-18	6.37e-09	5.18e-09	5.84e-08	7.32e-17	6.16e-17	4.12e-17	0.323	0.0271	0.00214	FALSE	TRUE	FALSE
Q12824	SMARCB1	-0.177	-0.656	0.33	-0.116	0.384	-0.479	0.507	0.0613	0.561	0.987	0.541	1.04	-0.446	0.0538	0.5	0.0168	1.76e-07	0.000209	0.096	5.2e-05	5.57e-06	3.06e-06	0.359	1.02e-06	1.43e-09	1.53e-06	7.52e-10	1.18e-05	0.419	3.59e-06	0.0308	2.67e-07	0.000407	0.127	0.00012	7.8e-06	9.19e-06	0.447	3.37e-06	3.74e-09	2.41e-06	2.04e-09	3.31e-05	0.535	1.1e-05	FALSE	FALSE	FALSE
Q12872	SFSWAP	-0.0159	1.04	0.014	-0.176	0.227	1.05	0.0299	-0.16	0.243	-1.02	-1.21	-0.811	-0.19	0.213	0.403	0.568	1.61e-14	0.615	2.2e-05	1.58e-06	1.33e-14	0.291	5.55e-05	7.52e-07	1.91e-14	2.22e-15	3.58e-13	1.02e-05	3.14e-06	2.04e-09	0.642	6.45e-14	0.658	5.93e-05	4.83e-06	6.73e-14	0.35	0.000188	2.55e-06	1.19e-13	1.45e-14	1.64e-12	2.9e-05	3.24e-05	1.37e-08	FALSE	TRUE	FALSE
Q12874	SF3A3	-0.102	-0.0824	0.098	-1.21	0.193	0.0195	0.2	-1.11	0.295	0.18	-1.13	0.275	-1.31	0.0949	1.41	0.00164	0.00694	0.00218	1.12e-15	4.92e-06	0.46	3.37e-06	3.4e-15	4.32e-08	9.9e-06	2.73e-15	9.57e-08	4.19e-16	0.00275	1.73e-16	0.00394	0.00767	0.00363	8.35e-14	1.36e-05	0.471	1.01e-05	3.55e-13	1.89e-07	1.6e-05	1.72e-14	1.95e-07	3.01e-14	0.00913	1.49e-14	FALSE	FALSE	FALSE
Q13435	SF3B2	-0.22	0.588	-0.0973	-1.05	0.0936	0.808	0.123	-0.831	0.314	-0.685	-1.64	-0.494	-0.954	0.191	1.15	9.83e-09	5.26e-14	7.05e-05	3.39e-17	0.000102	9.53e-16	7.06e-06	6.64e-16	1.34e-10	7.63e-15	1.21e-19	4.65e-13	1.16e-16	5.21e-08	1.15e-17	1.22e-07	1.88e-13	0.000148	6.12e-15	0.000224	6.45e-15	1.97e-05	9.7e-14	1.07e-09	5.26e-14	3.74e-18	2.08e-12	1.34e-14	1.06e-06	2.3e-15	FALSE	FALSE	FALSE
Q13838	DDX39B	-0.501	-4.37	-0.478	-0.352	-0.078	-3.87	0.0224	0.149	0.423	3.89	4.02	4.29	0.126	0.4	0.274	5.69e-07	1.41e-18	9.45e-07	2.37e-05	0.177	6.61e-18	0.688	0.0176	3.61e-06	6.14e-18	4.09e-18	1.77e-18	0.0381	6.4e-06	0.000247	3.78e-06	1.72e-17	2.63e-06	6.33e-05	0.219	8.42e-17	0.738	0.0333	1.07e-05	1.18e-16	6.18e-17	3.82e-17	0.0555	5.89e-05	0.000525	FALSE	TRUE	FALSE
Q14839	CHD4	-0.118	-1.32	0.192	-0.632	0.158	-1.21	0.31	-0.514	0.276	1.52	0.691	1.48	-0.825	-0.0346	0.79	1.4e-05	2.67e-18	6.74e-08	3.06e-14	6.42e-07	8.73e-18	2.17e-10	4.12e-13	9.18e-10	4.76e-19	9.97e-15	6.38e-19	1.07e-15	0.0686	1.84e-15	6.03e-05	2.92e-17	2.34e-07	1.06e-12	2.15e-06	1.08e-16	1.72e-09	1.6e-11	5.83e-09	1.48e-17	5.53e-14	1.67e-17	6.27e-14	0.131	1.04e-13	FALSE	TRUE	FALSE
Q15393	SF3B3	-0.238	0.311	0.0589	-1.05	0.229	0.549	0.297	-0.813	0.467	-0.252	-1.36	-0.082	-1.11	0.17	1.28	2.55e-08	1.02e-09	0.0108	2.52e-16	3.91e-08	9.1e-13	1.81e-09	6.46e-15	6.87e-12	1.26e-08	9.43e-18	0.00119	1.26e-16	1.14e-06	2.07e-17	2.68e-07	1.96e-09	0.016	2.38e-14	1.69e-07	3.17e-12	1.15e-08	5.9e-13	7.96e-11	2.9e-08	1.22e-16	0.00153	1.35e-14	1.35e-05	3.57e-15	FALSE	FALSE	FALSE
Q15428	SF3A2	-0.102	-0.383	-0.0917	-1.26	0.0553	-0.281	0.0104	-1.15	0.157	0.291	-0.874	0.438	-1.17	0.147	1.31	0.0176	1.69e-07	0.0297	8.53e-14	0.164	5.15e-06	0.785	2.47e-13	0.00109	3.5e-06	8.06e-12	3.56e-08	2.21e-13	0.00182	4.96e-14	0.032	2.58e-07	0.0411	2.5e-12	0.206	7.22e-06	0.823	1.03e-11	0.00207	5.96e-06	2.6e-11	7.61e-08	6.1e-12	0.00651	1.57e-12	FALSE	FALSE	FALSE
Q15459	SF3A1	-0.227	-0.207	-0.0215	-1.5	0.178	0.0196	0.205	-1.27	0.405	0.186	-1.29	0.385	-1.48	0.2	1.68	3.21e-08	9.19e-08	0.283	2.02e-18	5.2e-07	0.327	1.02e-07	1.62e-17	2.89e-11	3.22e-07	1.33e-17	5.34e-11	2.42e-18	1.43e-07	4.85e-19	3.23e-07	1.44e-07	0.329	1.15e-15	1.77e-06	0.338	4.26e-07	8.46e-15	2.77e-10	6.21e-07	1.63e-16	1.68e-10	6.6e-16	2.41e-06	1.67e-16	FALSE	FALSE	FALSE
Q53GS9	USP39	0.208	0.787	-0.0457	-0.253	0.12	0.579	-0.254	-0.461	-0.0888	-0.833	-1.04	-0.668	-0.207	0.165	0.373	5.46e-05	1.34e-11	0.217	7.94e-06	0.00484	5.93e-10	7.54e-06	9.16e-09	0.0257	6.66e-12	4.15e-13	1.03e-10	5.78e-05	0.000438	1.12e-07	0.000197	3.32e-11	0.258	2.34e-05	0.0081	1.33e-09	2.09e-05	7.92e-08	0.0385	2.48e-11	1.65e-12	3.13e-10	0.000143	0.00198	4.74e-07	FALSE	FALSE	FALSE
Q68CP9	ARID2	-0.124	1.1	0.504	0.0801	0.404	1.22	0.628	0.204	0.527	-0.592	-1.02	-0.692	-0.424	-0.1	0.324	0.00112	2.39e-14	3.81e-10	0.018	5.57e-09	6.22e-15	2.56e-11	1.22e-05	2.19e-10	5.31e-11	6.22e-14	7.62e-12	3.1e-09	0.0049	7.54e-08	0.00278	9.28e-14	2.11e-09	0.0279	2.84e-08	3.38e-14	2.6e-10	4.8e-05	1.66e-09	1.72e-10	2.94e-13	2.71e-11	2e-08	0.0148	3.34e-07	FALSE	TRUE	FALSE
Q7L014	DDX46	0.0811	0.514	0.311	-0.61	0.187	0.433	0.23	-0.691	0.106	-0.203	-1.12	-0.328	-0.921	-0.124	0.797	9.78e-05	4.45e-14	2.4e-11	5.17e-15	1.2e-08	3.84e-13	9.79e-10	1.07e-15	7.29e-06	4.35e-09	2.24e-18	1.26e-11	2.81e-17	1.25e-06	1.77e-16	0.000331	1.62e-13	1.82e-10	2.68e-13	5.71e-08	1.43e-12	6.64e-09	1.42e-13	2.03e-05	1.06e-08	3.87e-17	4.38e-11	4.65e-15	1.46e-05	1.49e-14	FALSE	FALSE	FALSE
Q7RTV0	PHF5A	-0.00219	0.137	0.083	-0.984	0.157	0.139	0.0852	-0.982	0.159	-0.0541	-1.12	0.0201	-1.07	0.0743	1.14	0.962	0.00933	0.0873	1.73e-11	0.00396	0.0085	0.0801	1.78e-11	0.00361	0.249	3.41e-12	0.661	6.32e-12	0.122	2.73e-12	0.971	0.0103	0.112	2.35e-10	0.00675	0.0095	0.11	3.78e-10	0.00636	0.267	1.17e-11	0.678	9.75e-11	0.206	4.82e-11	FALSE	FALSE	FALSE
Q86U86	PBRM1	0.00299	1.16	0.48	0.201	0.486	1.16	0.477	0.198	0.483	-0.681	-0.96	-0.675	-0.279	0.00628	0.285	0.89	1.73e-16	1.17e-11	3.99e-07	9.96e-12	1.79e-16	1.27e-11	4.72e-07	1.08e-11	1.45e-13	1.91e-15	1.63e-13	8.78e-09	0.772	6.73e-09	0.916	1.13e-15	9.6e-11	1.53e-06	9.4e-11	1.47e-15	1.38e-10	2.58e-06	1.18e-10	7.35e-13	1.28e-14	7.84e-13	4.98e-08	0.839	3.92e-08	FALSE	TRUE	FALSE
Q8NFD5	ARID1B	-0.292	-0.972	0.285	-0.449	0.31	-0.68	0.577	-0.157	0.602	1.26	0.523	1.28	-0.733	0.0252	0.759	0.011	2.48e-07	0.0127	0.000559	0.00781	1.19e-05	6.02e-05	0.135	3.99e-05	1.25e-08	0.000149	9.87e-09	5.4e-06	0.802	3.78e-06	0.0211	3.71e-07	0.0187	0.00114	0.0127	1.62e-05	0.000142	0.197	9.78e-05	2.87e-08	0.000193	2.26e-08	1.63e-05	0.858	1.15e-05	FALSE	FALSE	FALSE
Q8WWY3	PRPF31	0.159	0.815	0.24	-0.322	0.355	0.655	0.0804	-0.481	0.196	-0.575	-1.14	-0.459	-0.562	0.116	0.677	0.000138	1.07e-12	2.34e-06	8.67e-08	2.73e-08	1.62e-11	0.0183	7.23e-10	1.92e-05	8.17e-11	1.63e-14	1.27e-09	1.09e-10	0.00193	1.08e-11	0.000444	3.08e-12	6.17e-06	3.83e-07	1.21e-07	4.6e-11	0.0285	8.67e-09	4.97e-05	2.57e-10	8.62e-14	3.3e-09	1.15e-09	0.0068	1.51e-10	FALSE	FALSE	FALSE
Q92841	DDX17	-0.149	-0.662	-1.25	-0.25	-1.03	-0.513	-1.1	-0.101	-0.882	-0.586	0.412	-0.369	0.998	0.217	-0.781	0.00148	2.12e-10	7.91e-14	1.49e-05	8.68e-13	4.68e-09	3.92e-13	0.0174	6.11e-12	9.49e-10	6.22e-08	2.23e-07	1.31e-12	6.06e-05	2.77e-11	0.00358	4.46e-10	1.19e-12	4.14e-05	1.07e-11	9.34e-09	6.33e-12	0.0329	7.13e-11	2.55e-09	1.14e-07	4.35e-07	2.55e-11	0.000379	3.34e-10	FALSE	FALSE	TRUE
Q92922	SMARCC1	-0.243	-0.844	0.28	-0.432	0.36	-0.6	0.524	-0.189	0.603	1.12	0.412	1.2	-0.712	0.0794	0.792	1.51e-07	3.8e-14	2.95e-08	1.61e-10	1.5e-09	2.72e-12	1.49e-11	2.6e-06	2.57e-12	1.02e-15	2.89e-10	4.28e-16	3.2e-13	0.0052	8.49e-14	1.2e-06	1.4e-13	1.09e-07	1.55e-09	8.68e-09	8.73e-12	1.61e-10	1.18e-05	3.34e-11	8.7e-15	7.25e-10	3.82e-15	8.25e-12	0.0156	2.52e-12	FALSE	FALSE	FALSE
Q96DI7	SNRNP40	0.197	0.882	0.277	-0.149	0.255	0.684	0.0798	-0.346	0.0577	-0.604	-1.03	-0.626	-0.426	-0.0221	0.404	5.08e-08	4.71e-16	8.87e-10	1.23e-06	2.43e-09	1.16e-14	0.000538	5.77e-11	0.00572	5.55e-14	6.51e-17	3.53e-14	4.4e-12	0.226	8.55e-12	4.72e-07	2.7e-15	4.56e-09	4.26e-06	1.33e-08	5.9e-14	0.00109	1e-09	0.00968	3.07e-13	6.5e-16	1.98e-13	7.36e-11	0.336	1.25e-10	FALSE	FALSE	FALSE
Q9BUQ8	DDX23	-0.00723	0.968	-0.0835	-0.24	0.0144	0.975	-0.0763	-0.233	0.0216	-1.05	-1.21	-0.954	-0.157	0.0979	0.255	0.648	3.29e-17	0.000132	1.23e-09	0.371	2.99e-17	0.000295	1.78e-09	0.187	1.15e-17	1.98e-18	3.97e-17	1.91e-07	2.94e-05	6.08e-10	0.715	2.61e-16	0.000266	8.96e-09	0.43	3.1e-16	0.000624	1.96e-08	0.233	1.87e-16	3.45e-17	4.78e-16	7.93e-07	0.000209	4.69e-09	FALSE	FALSE	FALSE
Q9NWZ8	GEMIN8	0.267	1.92	-0.00625	0.46	0.188	1.66	-0.274	0.193	-0.0794	-1.93	-1.46	-1.74	0.466	0.194	-0.272	0.11	1.83e-08	0.969	0.0113	0.249	1.05e-07	0.102	0.237	0.618	1.77e-08	4.3e-07	6.12e-08	0.0105	0.234	0.104	0.159	3.07e-08	0.974	0.0182	0.299	1.77e-07	0.137	0.317	0.669	3.96e-08	7.16e-07	1.27e-07	0.0169	0.345	0.135	FALSE	TRUE	FALSE
Q9UMS4	PRPF19	-0.186	-0.706	-0.0923	-0.155	0.335	-0.52	0.0937	0.0315	0.521	0.614	0.552	1.04	-0.0622	0.427	0.489	1.07e-05	1.63e-12	0.00429	6.69e-05	1.52e-08	7.3e-11	0.00389	0.258	7.18e-11	9.38e-12	3.53e-11	1.24e-14	0.0365	8.15e-10	1.55e-10	4.73e-05	4.59e-12	0.00677	0.000163	7.13e-08	1.9e-10	0.0069	0.341	6.12e-10	3.39e-11	1.04e-10	7.58e-14	0.0534	4.35e-08	1.47e-09	FALSE	FALSE	FALSE
Q9Y383	LUC7L2	0.0462	1.82	0.257	0.24	0.301	1.77	0.211	0.194	0.255	-1.56	-1.58	-1.52	-0.0169	0.0442	0.0611	0.175	1.18e-16	2.62e-06	5.39e-06	4.57e-07	1.64e-16	2.05e-05	4.66e-05	2.85e-06	8.16e-16	7.12e-16	1.17e-15	0.609	0.193	0.0805	0.237	8.03e-16	6.87e-06	1.65e-05	1.57e-06	1.36e-15	5.27e-05	0.000161	8.65e-06	7.17e-15	5.28e-15	9.38e-15	0.655	0.298	0.107	FALSE	TRUE	FALSE
Q9Y3F4	STRAP	-0.63	-2.9	-0.411	-0.559	-0.042	-2.27	0.219	0.0717	0.588	2.49	2.34	2.86	-0.147	0.369	0.517	3.56e-12	1.5e-20	6.91e-10	1.6e-11	0.121	3.37e-19	1.1e-06	0.0144	8.42e-12	1.05e-19	2.27e-19	1.8e-20	6.5e-05	2.55e-09	4.22e-11	1.94e-10	4.55e-19	3.63e-09	2.2e-10	0.156	7.29e-18	3.67e-06	0.0277	9.58e-11	4.84e-18	6.03e-18	1.05e-18	0.000159	1.01e-07	4.83e-10	FALSE	TRUE	FALSE
O14893	GEMIN2	-0.0945	0.35	0.145	0.324	0.458	0.444	0.24	0.419	0.552	-0.205	-0.0254	0.108	0.179	0.313	0.133	0.403	0.00709	0.207	0.0111	0.0011	0.00139	0.0475	0.00214	0.000235	0.0839	0.82	0.341	0.125	0.0136	0.244	0.481	0.00784	0.248	0.0179	0.00208	0.00163	0.0684	0.00513	0.000506	0.0928	0.827	0.36	0.162	0.0347	0.292	FALSE	FALSE	FALSE
O43395	PRPF3	0.0958	0.766	0.248	-0.232	0.244	0.67	0.153	-0.327	0.148	-0.518	-0.998	-0.522	-0.48	-0.00464	0.475	0.000862	5.83e-14	5.81e-08	1.31e-07	7.24e-08	3.13e-13	1.24e-05	2.2e-09	1.69e-05	7.91e-12	2.08e-15	7.08e-12	2.02e-11	0.837	2.28e-11	0.00221	2.08e-13	2.04e-07	5.57e-07	2.96e-07	1.18e-12	3.29e-05	2.31e-08	4.44e-05	2.89e-11	1.37e-14	2.53e-11	2.66e-10	0.886	2.8e-10	FALSE	FALSE	FALSE
O43447	PPIH	0.181	-0.0245	0.0975	-0.383	0.194	-0.206	-0.0839	-0.565	0.0127	0.122	-0.359	0.219	-0.481	0.0966	0.577	1.01e-05	0.36	0.00238	2.08e-09	4.97e-06	2.66e-06	0.0065	1.8e-11	0.63	0.000418	4.61e-09	1.39e-06	1.31e-10	0.00255	1.36e-11	4.49e-05	0.37	0.00393	1.41e-08	1.37e-05	3.85e-06	0.0111	3.8e-10	0.678	0.000567	9.8e-09	2.46e-06	1.34e-09	0.0086	1.83e-10	FALSE	FALSE	FALSE
O75400	PRPF40A	0.077	0.229	-0.148	-0.738	0.151	0.152	-0.225	-0.815	0.0741	-0.377	-0.967	-0.0781	-0.59	0.299	0.889	0.00335	9.97e-08	1.18e-05	6.12e-14	9.64e-06	8.98e-06	1.22e-07	1.75e-14	0.00434	2.59e-10	2.01e-15	0.00305	1.02e-12	4.3e-09	5.83e-15	0.00736	1.56e-07	2.78e-05	1.84e-12	2.54e-05	1.23e-05	4.95e-07	1.12e-12	0.00753	7.5e-10	1.34e-14	0.00378	2.1e-11	1.42e-07	2.6e-13	FALSE	FALSE	FALSE
O75643	SNRNP200	0.0606	0.773	0.0411	-0.148	0.0832	0.713	-0.0195	-0.209	0.0226	-0.732	-0.922	-0.69	-0.19	0.0421	0.232	0.000389	4.63e-17	0.00668	3.61e-08	2.06e-05	1.3e-16	0.149	6e-10	0.099	9.24e-17	4.99e-18	1.96e-16	1.97e-09	0.00573	1.71e-10	0.0011	3.61e-16	0.0102	1.75e-07	5.13e-05	1.12e-15	0.192	7.39e-09	0.131	1.07e-15	7.26e-17	1.96e-15	1.35e-08	0.0169	1.59e-09	FALSE	FALSE	FALSE
O96019	ACTL6A	-0.16	-0.567	0.297	-0.339	0.346	-0.407	0.457	-0.179	0.506	0.864	0.228	0.913	-0.636	0.0487	0.685	0.00221	6.24e-09	9.05e-06	2.26e-06	1.81e-06	2.96e-07	7.93e-08	0.000937	2.43e-08	3.67e-11	0.00012	1.86e-11	1.57e-09	0.265	6.4e-10	0.00514	1.1e-08	2.18e-05	7.37e-06	5.43e-06	4.75e-07	3.39e-07	0.00242	1.12e-07	1.21e-10	0.000155	6.3e-11	1.11e-08	0.38	4.89e-09	FALSE	FALSE	FALSE
P14678	SNRPB	0.164	0.479	0.366	0.0592	0.0177	0.314	0.201	-0.105	-0.147	-0.113	-0.42	-0.461	-0.306	-0.348	-0.0415	6.65e-05	4.3e-10	1.12e-08	0.0572	0.544	6.55e-08	9.1e-06	0.00268	0.000189	0.00157	2.13e-09	6.8e-10	8.86e-08	2.01e-08	0.167	0.000234	8.69e-10	4.51e-08	0.0797	0.599	1.13e-07	2.49e-05	0.00625	0.000413	0.002	4.75e-09	1.85e-09	3.97e-07	4.9e-07	0.208	FALSE	FALSE	FALSE
P51532	SMARCA4	-0.232	-0.441	0.363	-0.36	0.315	-0.209	0.594	-0.128	0.547	0.804	0.0812	0.756	-0.723	-0.0479	0.675	8.38e-07	4.38e-10	4.68e-09	5.14e-09	2.51e-08	2.53e-06	1.11e-11	0.000306	3.14e-11	2.55e-13	0.0085	5.5e-13	9.68e-13	0.0904	2.28e-12	5.18e-06	8.84e-10	2.07e-08	3.09e-08	1.12e-07	3.68e-06	1.24e-10	0.000881	2.97e-10	1.22e-12	0.00966	2.41e-12	2.03e-11	0.163	4.18e-11	FALSE	FALSE	FALSE
P57678	GEMIN4	-0.273	0.415	0.306	-0.151	0.422	0.688	0.579	0.122	0.695	-0.108	-0.565	0.00762	-0.457	0.116	0.573	0.00145	3.91e-05	0.000591	0.0443	3.27e-05	1.77e-07	1.21e-06	0.0936	1.56e-07	0.133	1.58e-06	0.912	1.49e-05	0.11	1.37e-06	0.00353	4.92e-05	0.00108	0.0633	7.89e-05	2.93e-07	3.99e-06	0.144	6.13e-07	0.146	2.48e-06	0.92	4.1e-05	0.19	4.61e-06	FALSE	FALSE	FALSE
P62304	SNRPE	-0.936	-0.863	-0.694	-0.371	-0.841	0.073	0.242	0.566	0.0956	0.169	0.493	0.0225	0.324	-0.147	-0.47	0.000548	0.00105	0.00493	0.0936	0.00128	0.727	0.258	0.0163	0.648	0.424	0.032	0.914	0.138	0.487	0.0392	0.00148	0.0012	0.0077	0.125	0.00238	0.733	0.314	0.0311	0.695	0.443	0.0351	0.921	0.178	0.598	0.0557	FALSE	FALSE	FALSE
Q10570	CPSF1	-0.0849	-0.171	0.186	-0.675	0.0887	-0.0865	0.271	-0.59	0.174	0.358	-0.504	0.26	-0.862	-0.0977	0.764	5.92e-05	3e-08	1.11e-08	1.3e-15	3.88e-05	4.94e-05	1.18e-10	7.09e-15	2.58e-08	3.82e-12	5.23e-14	1.98e-10	5.93e-17	1.49e-05	2.72e-16	0.000211	4.89e-08	4.51e-08	8.64e-14	9.22e-05	6.4e-05	9.87e-10	6.11e-13	1.18e-07	1.49e-11	2.5e-13	5.77e-10	8.37e-15	0.00012	2.07e-14	FALSE	FALSE	FALSE
Q15029	EFTUD2	0.129	0.532	0.0835	-0.166	0.129	0.403	-0.0454	-0.295	-5.24e-05	-0.449	-0.698	-0.403	-0.249	0.0453	0.295	1.06e-05	5.64e-13	0.000596	7.13e-07	1.07e-05	1.8e-11	0.0289	8.49e-10	0.998	4.76e-12	1.86e-14	1.79e-11	6.37e-09	0.029	8.51e-10	4.69e-05	1.7e-12	0.00109	2.59e-06	2.79e-05	5.07e-11	0.0432	1e-08	0.998	1.82e-11	9.74e-14	6.08e-11	3.76e-08	0.0656	6.33e-09	FALSE	FALSE	FALSE
Q562R1	ACTBL2	NA	NA	NA	NA	NA	NA	-1.37	0.292	-1.75	NA	NA	NA	1.66	-0.375	-2.04	NA	NA	NA	NA	NA	NA	0.25	0.797	0.154	NA	NA	NA	0.0692	0.641	0.0343	NA	NA	NA	NA	NA	NA	0.305	0.846	0.196	NA	NA	NA	0.0948	0.732	0.0493	FALSE	FALSE	FALSE
Q6P2Q9	PRPF8	0.106	0.583	0.0861	-0.13	0.167	0.477	-0.0198	-0.236	0.0614	-0.497	-0.714	-0.416	-0.216	0.0812	0.298	6.1e-06	7.66e-15	4.91e-05	6.52e-07	3.73e-08	9.57e-14	0.191	6.02e-10	0.00095	5.73e-14	6e-16	5.39e-13	1.75e-09	8.53e-05	3.53e-11	2.86e-05	3.31e-14	0.000106	2.39e-06	1.62e-07	4.04e-13	0.24	7.39e-09	0.00183	3.16e-13	4.6e-15	2.36e-12	1.21e-08	0.000501	4.17e-10	FALSE	FALSE	FALSE
Q8IWX8	CHERP	-0.325	0.268	-0.0457	0.181	-0.0365	0.593	0.279	0.506	0.288	-0.314	-0.0869	-0.305	0.227	0.00915	-0.218	2.14e-11	2.25e-10	0.00976	2.5e-08	0.0308	1.13e-14	1.39e-10	8.31e-14	9.35e-11	3.24e-11	7.03e-05	4.67e-11	1.71e-09	0.554	2.81e-09	8.15e-10	4.72e-10	0.0146	1.25e-07	0.0449	5.77e-14	1.14e-09	4.05e-12	7.71e-10	1.08e-10	9.33e-05	1.49e-10	1.2e-08	0.66	1.8e-08	FALSE	FALSE	FALSE
Q8TAQ2	SMARCC2	-0.204	-0.637	0.3	-0.278	0.338	-0.432	0.504	-0.074	0.543	0.936	0.358	0.975	-0.578	0.0384	0.617	1.9e-06	2.51e-12	2.47e-08	5.86e-08	5.92e-09	3.04e-10	4.55e-11	0.0109	1.84e-11	1.97e-14	2.97e-09	1.19e-14	8.33e-12	0.147	3.74e-12	1.05e-05	6.8e-12	9.25e-08	2.66e-07	3e-08	7.14e-10	4.28e-10	0.0216	1.9e-10	1.22e-13	6.48e-09	7.29e-14	1.23e-10	0.239	6.34e-11	FALSE	FALSE	FALSE
Q8TEQ6	GEMIN5	-0.359	-0.276	0.000214	-0.0249	0.295	0.0826	0.359	0.334	0.654	0.276	0.251	0.571	-0.0251	0.295	0.32	2.22e-06	3.31e-05	0.996	0.583	1.7e-05	0.0848	2.2e-06	4.78e-06	2.18e-09	3.28e-05	8.18e-05	1.1e-08	0.58	1.71e-05	7.41e-06	1.19e-05	4.19e-05	0.997	0.639	4.28e-05	0.09	6.85e-06	2.05e-05	1.27e-08	4.96e-05	0.000108	2.51e-08	0.628	0.000133	2.11e-05	FALSE	FALSE	FALSE
Q969G3	SMARCE1	-0.281	-0.573	0.306	-0.439	0.253	-0.292	0.587	-0.158	0.535	0.879	0.134	0.826	-0.745	-0.0524	0.692	2.86e-07	5.9e-11	1.1e-07	1.53e-09	9.21e-07	1.91e-07	4.35e-11	0.000117	1.38e-10	2.85e-13	0.000484	6.17e-13	2.26e-12	0.0927	5.62e-12	2.11e-06	1.34e-10	3.66e-07	1.08e-08	2.97e-06	3.14e-07	4.12e-10	0.000371	1.09e-09	1.36e-12	0.0006	2.69e-12	4.09e-11	0.166	8.7e-11	FALSE	FALSE	FALSE
Q96GM5	SMARCD1	-0.0939	0.234	0.328	-0.344	0.4	0.328	0.422	-0.25	0.494	0.0938	-0.578	0.166	-0.671	0.0721	0.744	0.117	0.00111	6.02e-05	3.84e-05	8.34e-06	6.01e-05	4.79e-06	0.000665	8.7e-07	0.118	1.49e-07	0.0111	2.59e-08	0.22	7.75e-09	0.168	0.00127	0.000128	9.79e-05	2.22e-05	7.72e-05	1.39e-05	0.00179	2.91e-06	0.129	2.61e-07	0.0131	1.29e-07	0.329	4.41e-08	FALSE	FALSE	FALSE
Q9HCK8	CHD8	-0.057	-0.238	0.427	-0.105	0.169	-0.181	0.484	-0.0482	0.226	0.665	0.133	0.407	-0.532	-0.259	0.274	0.0211	7.43e-08	6.48e-11	0.000334	3.44e-06	1.62e-06	1.38e-11	0.0448	1.36e-07	2.61e-13	3.99e-05	1.2e-10	4.22e-12	2.81e-08	1.42e-08	0.0374	1.18e-07	4.36e-10	0.000715	9.77e-06	2.41e-06	1.5e-10	0.0759	5.4e-07	1.25e-12	5.4e-05	3.6e-10	7.12e-11	6.38e-07	7.56e-08	FALSE	FALSE	FALSE
Q9UHI6	DDX20	-0.187	-0.301	0.182	0.264	0.385	-0.114	0.369	0.451	0.572	0.483	0.564	0.686	0.0816	0.203	0.122	8.67e-05	6.57e-07	0.000114	2.8e-06	3.92e-08	0.0047	6.38e-08	6.06e-09	3.38e-10	2.67e-09	4.01e-10	3.64e-11	0.0291	4.02e-05	0.00297	0.000296	9.44e-07	0.000231	9.02e-06	1.69e-07	0.00534	2.8e-07	5.47e-08	2.41e-09	6.72e-09	9.96e-10	1.18e-10	0.0432	0.000268	0.00513	FALSE	FALSE	FALSE
Q9UQ35	SRRM2	0.257	0.83	0.484	0.819	0.363	0.573	0.227	0.562	0.106	-0.346	-0.0111	-0.467	0.335	-0.121	-0.456	1.85e-06	1.55e-12	1.22e-09	1.83e-12	3.73e-08	1.54e-10	7.1e-06	1.96e-10	0.00487	6.45e-08	0.728	1.86e-09	9.4e-08	0.00201	2.49e-09	1.03e-05	4.36e-12	6.11e-09	3.38e-11	1.62e-07	3.8e-10	1.98e-05	2.77e-09	0.00836	1.35e-07	0.738	4.73e-09	4.18e-07	0.00704	1.62e-08	FALSE	FALSE	FALSE
Q9Y230	RUVBL2	-0.289	-0.456	-0.0724	-0.262	-0.00181	-0.167	0.217	0.0268	0.287	0.383	0.193	0.454	-0.19	0.0706	0.26	5.72e-08	2.44e-10	0.0149	1.76e-07	0.945	2.3e-05	1.49e-06	0.317	6.15e-08	2e-09	4.98e-06	2.56e-10	6.11e-06	0.017	1.9e-07	5.17e-07	5.08e-10	0.0216	7.24e-07	0.954	3.06e-05	4.82e-06	0.402	2.59e-07	5.14e-09	7.38e-06	7.35e-10	1.82e-05	0.0422	7.75e-07	FALSE	FALSE	FALSE
Q9Y265	RUVBL1	-0.036	-0.118	0.263	-0.0362	0.284	-0.0825	0.299	-0.000245	0.32	0.381	0.0822	0.402	-0.299	0.0207	0.32	0.29	0.00311	2.34e-06	0.287	1.03e-06	0.0253	5.74e-07	0.994	2.7e-07	3.52e-08	0.0257	1.89e-08	5.69e-07	0.536	2.68e-07	0.364	0.0035	6.18e-06	0.343	3.27e-06	0.0277	2.04e-06	0.995	1.01e-06	7.61e-08	0.0283	4.15e-08	2.11e-06	0.644	1.06e-06	FALSE	FALSE	FALSE
Q9Y4Z0	LSM4	0.434	-0.407	0.444	0.0032	0.375	-0.841	0.00956	-0.431	-0.0591	0.85	0.41	0.782	-0.44	-0.0687	0.372	2.69e-06	5.36e-06	2.12e-06	0.954	1.25e-05	1.3e-09	0.863	2.91e-06	0.298	1.13e-09	4.93e-06	3.13e-09	2.3e-06	0.23	1.36e-05	1.41e-05	7.11e-06	5.64e-06	0.961	3.2e-05	2.79e-09	0.888	1.3e-05	0.355	3e-09	7.31e-06	7.71e-09	7.47e-06	0.34	3.73e-05	FALSE	FALSE	FALSE
A0AVF1	TTC26	0.183	-0.869	-0.464	-0.184	-0.216	-1.05	-0.647	-0.367	-0.399	0.405	0.685	0.653	0.28	0.248	-0.0318	0.356	0.000575	0.0306	0.352	0.279	0.000109	0.00498	0.0772	0.0574	0.0544	0.00343	0.00471	0.167	0.217	0.871	0.433	0.000669	0.0422	0.41	0.332	0.000137	0.00865	0.122	0.0805	0.0613	0.004	0.00574	0.21	0.325	0.889	FALSE	FALSE	FALSE
A0AVT1	UBA6	-0.933	-2.35	-0.375	0.762	-0.468	-1.42	0.558	1.7	0.465	1.98	3.11	1.88	1.14	-0.0934	-1.23	0.0106	9.84e-06	0.241	0.103	0.15	0.000698	0.0923	0.00231	0.153	4.69e-05	1.8e-05	7.13e-05	0.0225	0.763	0.0153	0.0203	1.28e-05	0.284	0.135	0.19	0.000834	0.125	0.00549	0.194	6.95e-05	2.53e-05	0.000104	0.0343	0.833	0.0235	FALSE	TRUE	FALSE
A0FGR8	ESYT2	-0.132	-2.3	-2.73	-1.2	-2.29	-2.17	-2.6	-1.07	-2.16	-0.433	1.1	0.00887	1.53	0.441	-1.09	0.00745	1.5e-16	1.69e-17	5.31e-13	1.57e-16	3.17e-16	3.16e-17	2.27e-12	3.33e-16	1.36e-07	1.7e-12	0.834	2.62e-14	1.07e-07	1.88e-12	0.0148	9.97e-16	8.06e-16	1.18e-11	5.39e-15	2.38e-15	1.8e-15	6.58e-11	1.36e-14	2.74e-07	6.08e-12	0.844	9.97e-13	1.87e-06	3.55e-11	FALSE	TRUE	TRUE
A0JLT2	MED19	-0.49	-1.52	-1.24	-1.54	-0.928	-1.03	-0.751	-1.05	-0.439	0.281	-0.0198	0.593	-0.301	0.312	0.613	0.00291	4.75e-08	4.91e-07	4.08e-08	1.11e-05	3.67e-06	8.87e-05	3e-06	0.00601	0.0554	0.884	0.000689	0.0423	0.0361	0.000527	0.00652	7.62e-08	1.43e-06	1.94e-07	2.89e-05	5.25e-06	0.000202	1.34e-05	0.0101	0.0624	0.889	0.000909	0.061	0.0786	0.00105	FALSE	TRUE	TRUE
A1A4S6	ARHGAP10	-0.608	-3.1	-1.91	-2.39	-1.71	-2.5	-1.3	-1.78	-1.11	1.19	0.712	1.39	-0.482	0.196	0.678	0.000245	2.44e-12	9.82e-10	6.23e-11	3.62e-09	3.68e-11	9.32e-08	2.24e-09	5.93e-07	2.48e-07	5.77e-05	4.33e-08	0.00161	0.13	9.22e-05	0.000733	6.62e-12	5.03e-09	6.98e-10	1.92e-08	9.89e-11	3.93e-07	2.34e-08	2.05e-06	4.88e-07	7.71e-05	9.15e-08	0.00304	0.217	0.000212	FALSE	TRUE	TRUE
A1KZ92	PXDNL	NA	NA	NA	NA	NA	-1.62	-1.21	NA	-0.956	0.414	NA	0.668	NA	0.254	NA	NA	NA	NA	NA	NA	0.00159	0.0111	NA	0.0209	0.237	NA	0.053	NA	0.452	NA	NA	NA	NA	NA	NA	0.00185	0.0181	NA	0.0318	0.254	NA	0.0596	NA	0.566	NA	FALSE	FALSE	FALSE
A1X283	SH3PXD2B	-0.0851	-3.89	-0.166	-0.298	-0.301	-3.8	-0.0813	-0.213	-0.216	3.72	3.59	3.59	-0.132	-0.135	-0.00297	0.577	1.94e-12	0.284	0.0667	0.0643	2.56e-12	0.594	0.176	0.17	3.36e-12	5.26e-12	5.31e-12	0.392	0.382	0.984	0.65	5.37e-12	0.329	0.0915	0.0876	8.27e-12	0.653	0.246	0.215	1.31e-11	1.75e-11	1.94e-11	0.448	0.498	0.987	FALSE	TRUE	FALSE
A3KN83	SBNO1	0.0732	-1.34	0.103	-1.35	-0.103	-1.42	0.0303	-1.43	-0.176	1.45	-0.00922	1.24	-1.46	-0.206	1.25	0.562	7.66e-08	0.415	7.08e-08	0.418	4.14e-08	0.809	3.83e-08	0.176	3.23e-08	0.941	1.91e-07	3e-08	0.118	1.75e-07	0.636	1.21e-07	0.465	3.18e-07	0.478	7.28e-08	0.843	2.72e-07	0.221	7.02e-08	0.944	3.76e-07	1.47e-07	0.2	7.24e-07	FALSE	TRUE	FALSE
A4D1P6	WDR91	NA	NA	NA	NA	NA	-1.39	-0.642	0.419	0.265	0.743	1.8	1.65	1.06	0.907	-0.154	NA	NA	NA	NA	NA	4.22e-05	0.0109	0.0712	0.232	0.00469	3.78e-06	8.71e-06	0.000389	0.00125	0.478	NA	NA	NA	NA	NA	5.5e-05	0.0179	0.113	0.284	0.00574	5.67e-06	1.4e-05	0.000833	0.00479	0.531	FALSE	FALSE	FALSE
A5A3E0	POTEF	-0.2	-0.949	0.617	0.605	-0.208	-0.749	0.817	0.805	-0.00744	1.57	1.55	0.742	-0.0122	-0.825	-0.813	0.0326	5.05e-08	6.1e-06	7.52e-06	0.0276	7.52e-07	2.82e-07	3.35e-07	0.931	1.23e-10	1.35e-10	8.4e-07	0.886	2.55e-07	3.02e-07	0.0552	8.08e-08	1.5e-05	2.24e-05	0.0406	1.16e-06	1.06e-06	1.89e-06	0.939	3.75e-10	3.57e-10	1.54e-06	0.907	3.93e-06	1.18e-06	FALSE	FALSE	FALSE
A5D8V7	CCDC151	NA	NA	NA	NA	NA	-1.01	-1.91	-0.781	-1.61	-0.902	0.227	-0.603	1.13	0.298	-0.83	NA	NA	NA	NA	NA	1.37e-06	3.63e-09	1.29e-05	1.81e-08	1.37e-06	0.0261	4.43e-05	1.77e-07	0.00649	2.87e-06	NA	NA	NA	NA	NA	2.06e-06	2.08e-08	5.02e-05	8.56e-08	2.46e-06	0.0288	6.61e-05	7.43e-07	0.0187	9.07e-06	FALSE	FALSE	FALSE
A5PLN9	TRAPPC13	-1.92	-4.33	-1.76	NA	-0.609	-2.41	0.156	NA	1.31	2.57	NA	3.72	NA	1.15	NA	0.00469	5.2e-05	0.00288	NA	0.174	0.000741	0.638	NA	0.0203	0.000117	NA	0.000105	NA	0.0154	NA	0.00991	6.49e-05	0.00467	NA	0.216	0.000885	0.694	NA	0.0311	0.000166	NA	0.000151	NA	0.0389	NA	TRUE	TRUE	TRUE
A5YKK6	CNOT1	-0.449	-2.63	-0.84	-0.109	-0.87	-2.18	-0.391	0.34	-0.421	1.79	2.52	1.76	0.731	-0.0304	-0.762	4.6e-10	1.03e-19	1.93e-13	0.00137	1.23e-13	1.11e-18	2.47e-09	1.3e-08	9.98e-10	1.36e-17	1.76e-19	1.69e-17	1.1e-12	0.275	6.58e-13	9.51e-09	2.08e-18	2.55e-12	0.00262	1.91e-12	1.92e-17	1.5e-08	1.07e-07	6.3e-09	2.14e-16	4.97e-18	2.28e-16	2.2e-11	0.39	1.43e-11	FALSE	TRUE	FALSE
A6NCE7	MAP1LC3B2	-0.67	-2.33	-0.884	-0.74	-0.626	-1.66	-0.215	-0.0707	0.0439	1.45	1.59	1.71	0.144	0.258	0.115	3.2e-05	1.87e-11	1.8e-06	1.17e-05	6.16e-05	1.19e-09	0.0665	0.52	0.688	6.3e-09	2.02e-09	8.7e-10	0.202	0.0315	0.304	0.000125	4.53e-11	4.8e-06	3.35e-05	0.000141	2.58e-09	0.0925	0.61	0.73	1.51e-08	4.51e-09	2.33e-09	0.249	0.0704	0.355	FALSE	TRUE	FALSE
A6NDG6	PGP	-0.673	-3.8	1.07	0.307	NA	-3.13	1.74	0.98	NA	4.87	4.11	NA	-0.763	NA	NA	0.282	0.000479	0.11	0.608	NA	0.000388	0.0102	0.0806	NA	3.56e-05	9.04e-05	NA	0.152	NA	NA	0.356	0.00056	0.139	0.663	NA	0.000471	0.0167	0.126	NA	5.36e-05	0.000119	NA	0.195	NA	NA	FALSE	TRUE	FALSE
A6NFI3	ZNF316	0.187	1.72	1.27	0.508	1.07	1.53	1.08	0.32	0.885	-0.452	-1.21	-0.646	-0.759	-0.195	0.565	0.176	8.85e-09	3.06e-07	0.00194	1.94e-06	3.45e-08	1.8e-06	0.0294	1.46e-05	0.00436	5.09e-07	0.000284	6.56e-05	0.161	0.000863	0.238	1.53e-08	9.24e-07	0.00363	5.77e-06	6.13e-08	5.72e-06	0.0525	3.85e-05	0.00535	8.42e-07	0.000389	0.00016	0.256	0.00165	FALSE	TRUE	TRUE
A6NHR9	SMCHD1	-0.352	-3.15	-1.53	-0.547	-1.19	-2.8	-1.18	-0.195	-0.841	1.62	2.61	1.96	0.982	0.335	-0.646	2.74e-06	6.34e-18	5.99e-14	1.86e-08	1.34e-12	2.85e-17	1.6e-12	0.00075	1.03e-10	2.81e-14	7.12e-17	2.63e-15	1.54e-11	4.66e-06	2.57e-09	1.43e-05	6.14e-17	9.18e-13	9.7e-08	1.58e-11	2.98e-16	2.22e-11	0.00199	8.43e-10	1.67e-13	6.96e-16	1.94e-14	2.11e-10	4.5e-05	1.67e-08	FALSE	TRUE	TRUE
A6NI28	ARHGAP42	-0.154	-1.46	-2.46	-1.42	-2.75	-1.3	-2.31	-1.27	-2.6	-1.01	0.034	-1.3	1.04	-0.29	-1.33	0.616	0.000336	1.99e-06	0.000411	5.83e-07	0.000845	3.97e-06	0.00104	1.1e-06	0.00542	0.912	0.000887	0.00437	0.352	0.000722	0.685	0.000396	5.28e-06	0.000866	1.97e-06	0.001	1.16e-05	0.00266	3.61e-06	0.00659	0.916	0.00116	0.00759	0.47	0.0014	FALSE	TRUE	TRUE
A6NIH7	UNC119B	-1.11	-4.44	NA	-1.02	-0.907	-3.32	NA	0.0956	0.206	NA	3.42	3.53	NA	NA	0.111	0.0455	3.35e-06	NA	0.0628	0.0636	7.77e-05	NA	0.859	0.676	NA	6.28e-05	2.08e-05	NA	NA	0.822	0.0738	4.54e-06	NA	0.0867	0.0868	9.92e-05	NA	0.895	0.719	NA	8.36e-05	3.23e-05	NA	NA	0.846	FALSE	TRUE	FALSE
A6NNZ2	A6NNZ2	0.0712	-1.75	-0.917	-0.271	-0.0987	-1.82	-0.988	-0.343	-0.17	0.83	1.48	1.65	0.645	0.818	0.173	0.79	0.001	0.024	0.341	0.713	0.00201	0.0296	0.303	0.588	0.0271	0.00416	0.00283	0.0931	0.0507	0.583	0.834	0.00115	0.0337	0.399	0.753	0.00233	0.0442	0.389	0.643	0.0313	0.00483	0.00352	0.124	0.103	0.633	FALSE	TRUE	FALSE
A6ZKI3	RTL8C	-0.234	1.61	0.524	0.2	0.168	1.85	0.758	0.434	0.403	-1.09	-1.41	-1.44	-0.324	-0.356	-0.0314	0.00844	2.34e-11	1.1e-05	0.0201	0.0437	4.33e-12	1.99e-07	7.09e-05	0.000142	2.89e-09	1.2e-10	9.16e-11	0.000887	0.000418	0.683	0.0165	5.61e-11	2.61e-05	0.0308	0.0616	1.34e-11	7.7e-07	0.000236	0.000317	7.23e-09	3.2e-10	2.8e-10	0.00177	0.0019	0.723	FALSE	TRUE	FALSE
A7E2V4	ZSWIM8	-0.0779	-1.37	0.0123	-0.463	-0.28	-1.3	0.0902	-0.385	-0.202	1.39	0.912	1.09	-0.475	-0.292	0.183	0.594	3.3e-07	0.932	0.00652	0.0717	6.34e-07	0.538	0.0184	0.18	2.98e-07	2.62e-05	4.01e-06	0.00553	0.0615	0.222	0.665	4.88e-07	0.944	0.011	0.0966	9.79e-07	0.6	0.0346	0.226	5.8e-07	3.6e-05	6.76e-06	0.00941	0.12	0.269	FALSE	TRUE	FALSE
A8MWD9	SNRPGP15	0.547	2.75	0.764	0.354	0.448	2.2	0.217	-0.193	-0.0986	-1.99	-2.39	-2.3	-0.41	-0.316	0.0943	1.99e-07	4.73e-16	3.97e-09	2.14e-05	1.82e-06	7.81e-15	0.00158	0.00364	0.0928	2.89e-14	2.7e-15	4.49e-15	4.78e-06	6.58e-05	0.107	1.54e-06	2.7e-15	1.78e-08	5.79e-05	5.46e-06	4.13e-14	0.00299	0.00823	0.124	1.71e-13	1.71e-14	3.04e-14	1.46e-05	0.000404	0.138	FALSE	TRUE	FALSE
A8MXV4	NUDT19	NA	NA	NA	NA	NA	NA	NA	NA	NA	1.07	NA	0.237	NA	-0.834	NA	NA	NA	NA	NA	NA	NA	NA	NA	NA	0.00148	NA	0.0968	NA	0.00426	NA	NA	NA	NA	NA	NA	NA	NA	NA	NA	0.0019	NA	0.107	NA	0.0132	NA	FALSE	FALSE	FALSE
B2RTY4	MYO9A	-1.44	-1.5	-2.14	-0.695	-2.13	-0.0544	-0.695	0.749	-0.685	-0.64	0.803	-0.631	1.44	0.00925	-1.43	7.19e-05	5.43e-05	3.28e-06	0.0227	3.4e-06	0.717	0.00109	0.00565	0.00119	0.00184	0.00379	0.00201	7.19e-05	0.951	7.55e-05	0.00025	6.75e-05	8.5e-06	0.0344	9.66e-06	0.724	0.0021	0.0121	0.00225	0.00233	0.0044	0.00254	0.000174	0.965	0.000178	TRUE	TRUE	TRUE
C4AMC7	WASH3P	0.285	-0.511	0.803	0.0213	0.405	-0.796	0.518	-0.264	0.12	1.31	0.533	0.916	-0.782	-0.398	0.384	1.22e-06	1.35e-09	5.22e-12	0.533	2.21e-08	5.8e-12	1.15e-09	2.83e-06	0.00327	1.07e-14	8.23e-10	1e-12	7.3e-12	2.69e-08	4.16e-08	7.17e-06	2.57e-09	4.61e-11	0.59	1e-07	1.75e-11	7.65e-09	1.27e-05	0.0058	7.11e-14	1.95e-09	4.2e-12	1.09e-10	6.21e-07	1.96e-07	FALSE	FALSE	FALSE
C9JRZ8	AKR1B15	-0.696	-5.94	0.105	-1.14	1.7	-5.24	0.801	-0.44	2.39	6.04	4.8	7.63	-1.24	1.59	2.83	0.0893	1.07e-09	0.786	0.0104	0.000645	4.82e-09	0.0546	0.266	2.91e-05	8.65e-10	1.37e-08	4.91e-11	0.00613	0.00107	5.2e-06	0.134	2.06e-09	0.818	0.0169	0.00126	9.57e-09	0.0776	0.349	7.32e-05	2.34e-09	2.73e-08	1.55e-10	0.0104	0.00418	1.54e-05	FALSE	TRUE	FALSE
D6RIA3	C4orf54	-0.0744	-0.111	-0.919	-0.00523	-1.34	-0.0366	-0.844	0.0692	-1.27	-0.808	0.106	-1.23	0.914	-0.422	-1.34	0.284	0.12	5.06e-09	0.939	5.07e-11	0.592	1.38e-08	0.318	1.03e-10	2.34e-08	0.137	1.47e-10	5.41e-09	2.9e-05	5.33e-11	0.359	0.126	2.22e-08	0.95	4.08e-10	0.601	7.03e-08	0.404	8.43e-10	5.15e-08	0.145	4.38e-10	3.26e-08	0.000206	5.8e-10	FALSE	FALSE	FALSE
E9PAV3	NACA	-1.13	-3.63	-1.31	-2.97	-0.773	-2.49	-0.178	-1.84	0.36	2.32	0.652	2.85	-1.66	0.539	2.2	3.81e-08	2.32e-14	6.79e-09	2.81e-13	2.83e-06	2.57e-12	0.0911	1.1e-10	0.00277	6.47e-12	1.67e-05	4.74e-13	3.85e-10	0.000106	1.21e-11	3.76e-07	9.03e-14	2.89e-08	7e-12	8.19e-06	8.28e-12	0.124	1.71e-09	0.00498	2.42e-11	2.35e-05	2.11e-12	3.31e-09	0.000595	1.66e-10	TRUE	TRUE	TRUE
E9PRG8	C11orf98	0.205	2.21	0.582	0.244	0.613	2.01	0.377	0.0394	0.408	-1.63	-1.97	-1.6	-0.337	0.0317	0.369	0.00042	4.31e-16	7.1e-09	8.84e-05	3.76e-09	1.47e-15	1.06e-06	0.381	4.32e-07	2.03e-14	1.89e-15	2.6e-14	3.51e-06	0.478	1.33e-06	0.00117	2.5e-15	3.02e-08	0.000212	1.99e-08	9.57e-15	3.57e-06	0.471	1.55e-06	1.25e-13	1.27e-14	1.49e-13	1.1e-05	0.589	4.5e-06	FALSE	TRUE	FALSE
O00116	AGPS	NA	NA	NA	NA	NA	NA	NA	NA	NA	-0.392	2.65	-0.0402	3.04	0.352	-2.69	NA	NA	NA	NA	NA	NA	NA	NA	NA	0.00628	2.7e-09	0.723	8.24e-10	0.0111	2.37e-09	NA	NA	NA	NA	NA	NA	NA	NA	NA	0.00759	5.93e-09	0.738	6.3e-09	0.0295	1.56e-08	FALSE	FALSE	FALSE
O00139	KIF2A	-0.142	-1.84	-0.944	-0.317	-0.864	-1.7	-0.801	-0.175	-0.721	0.894	1.52	0.974	0.626	0.0801	-0.546	0.00333	1.41e-15	6.14e-12	2.5e-06	1.85e-11	3.9e-15	4.68e-11	0.000726	1.71e-10	1.2e-11	1.54e-14	4.12e-12	9.58e-10	0.0645	4.99e-09	0.00732	7.23e-15	5.3e-11	8.11e-06	1.63e-10	2.27e-14	4.37e-10	0.00193	1.34e-09	4.3e-11	8.2e-14	1.53e-11	7.2e-09	0.125	2.99e-08	FALSE	TRUE	FALSE
O00151	PDLIM1	-0.741	-5.86	-0.845	-0.64	-0.569	-5.12	-0.105	0.101	0.172	5.02	5.22	5.29	0.206	0.276	0.0708	3.34e-07	2.65e-18	7.37e-08	1.7e-06	5.93e-06	1.47e-17	0.197	0.213	0.0442	1.91e-17	1.15e-17	9.69e-18	0.0194	0.00338	0.375	2.39e-06	2.92e-17	2.53e-07	5.72e-06	1.62e-05	1.71e-16	0.247	0.289	0.0633	2.86e-16	1.42e-16	1.41e-16	0.0299	0.0109	0.427	FALSE	TRUE	FALSE
O00154	ACOT7	-0.754	-3.45	0.277	-0.674	1.08	-2.7	1.03	0.08	1.83	3.73	2.78	4.53	-0.951	0.801	1.75	0.117	1.35e-05	0.501	0.237	0.024	8.98e-05	0.0291	0.883	0.00134	2.96e-06	0.000397	5.95e-07	0.0906	0.0506	0.00702	0.167	1.74e-05	0.551	0.289	0.0357	0.000114	0.0434	0.913	0.00251	5.08e-06	0.000496	1.11e-06	0.121	0.103	0.0114	FALSE	TRUE	FALSE
O00159	MYO1C	-0.192	-1.54	-0.761	0.0649	-0.853	-1.35	-0.57	0.256	-0.662	0.78	1.61	0.687	0.826	-0.0921	-0.918	1.01e-07	5.73e-19	4.35e-15	0.0032	1.03e-15	3.09e-18	1.68e-13	3.23e-09	2.55e-14	3.22e-15	3.4e-19	1.58e-14	1.55e-15	0.000202	4.06e-16	8.46e-07	8.03e-18	9.29e-14	0.00576	2.82e-14	4.48e-17	3.05e-12	3.21e-08	6.01e-13	2.45e-14	8.21e-18	9.44e-14	8.08e-14	0.00104	2.85e-14	FALSE	TRUE	FALSE
O00170	AIP	NA	NA	NA	NA	NA	-3.13	1.07	2.65	0.254	4.2	5.77	3.38	1.58	-0.816	-2.39	NA	NA	NA	NA	NA	2.62e-06	8.35e-05	7.14e-06	0.00403	1.18e-06	4.96e-07	2.12e-06	2.91e-05	0.000174	9.39e-06	NA	NA	NA	NA	NA	3.81e-06	0.000191	2.95e-05	0.00704	2.13e-06	8.21e-07	3.69e-06	7.6e-05	0.000913	2.63e-05	FALSE	FALSE	FALSE
O00178	GTPBP1	-0.494	-2.26	-1.11	-0.823	-1.2	-1.77	-0.611	-0.328	-0.702	1.16	1.44	1.07	0.282	-0.0909	-0.373	0.000114	3.24e-12	2.07e-08	6.13e-07	8.1e-09	6.9e-11	1.48e-05	0.00309	3.49e-06	1.17e-08	8.52e-10	3.06e-08	0.00816	0.332	0.00122	0.000378	8.66e-12	7.92e-08	2.27e-06	3.97e-08	1.8e-10	3.89e-05	0.00709	1.04e-05	2.7e-08	2.01e-09	6.58e-08	0.0135	0.45	0.00227	FALSE	TRUE	TRUE
O00186	STXBP3	NA	NA	NA	NA	NA	NA	NA	NA	NA	0.915	NA	1.16	NA	0.243	NA	NA	NA	NA	NA	NA	NA	NA	NA	NA	0.000132	NA	3.04e-05	NA	0.0784	NA	NA	NA	NA	NA	NA	NA	NA	NA	NA	0.000187	NA	4.63e-05	NA	0.146	NA	FALSE	FALSE	FALSE
O00231	PSMD11	-0.188	-1.14	0.244	-0.229	0.193	-0.949	0.433	-0.0403	0.381	1.38	0.909	1.33	-0.473	-0.0513	0.422	8.21e-07	2.28e-16	4.25e-08	9.17e-08	6.28e-07	2.26e-15	4.26e-11	0.0805	2.02e-10	1.94e-17	3.9e-15	3.13e-17	1.41e-11	0.0312	5.87e-11	5.15e-06	1.45e-15	1.53e-07	4.01e-07	2.11e-06	1.41e-14	4.05e-10	0.126	1.54e-09	2.89e-16	2.38e-14	3.85e-16	1.96e-10	0.07	6.31e-10	FALSE	TRUE	FALSE
O00232	PSMD12	-0.199	-1.56	0.136	0.0126	0.247	-1.36	0.335	0.212	0.446	1.7	1.58	1.81	-0.124	0.11	0.234	0.00563	1.99e-12	0.0409	0.837	0.00126	1.09e-11	9.35e-05	0.00378	5.54e-06	7e-13	1.8e-12	3.18e-13	0.0598	0.0883	0.00186	0.0116	5.49e-12	0.0551	0.866	0.00234	3.16e-11	0.000213	0.00849	1.58e-05	3.15e-12	6.43e-12	1.47e-12	0.0832	0.16	0.00333	FALSE	TRUE	FALSE
O00233	PSMD9	-0.804	-3.39	0.0378	0.447	-0.11	-2.58	0.842	1.25	0.695	3.42	3.83	3.28	0.41	-0.147	-0.557	0.0161	1.49e-07	0.896	0.286	0.705	2.14e-06	0.0127	0.00971	0.032	1.33e-07	1.34e-06	2.07e-07	0.327	0.612	0.191	0.0297	2.28e-07	0.911	0.342	0.747	3.13e-06	0.0205	0.0195	0.0472	2.7e-07	2.12e-06	4.05e-07	0.381	0.708	0.235	FALSE	TRUE	FALSE
O00258	WRB	NA	NA	NA	NA	NA	NA	NA	NA	NA	-1.12	1.76	-0.553	2.88	0.564	-2.31	NA	NA	NA	NA	NA	NA	NA	NA	NA	1.22e-06	2.7e-08	0.000289	3.95e-10	0.000249	2.6e-09	NA	NA	NA	NA	NA	NA	NA	NA	NA	2.2e-06	5.19e-08	0.000396	3.37e-09	0.00122	1.68e-08	FALSE	FALSE	FALSE
O00264	PGRMC1	-0.182	-2.17	-4.36	-2.63	-4.17	-1.99	-4.18	-2.45	-3.98	-2.19	-0.457	-2	1.73	0.193	-1.54	0.186	1.51e-09	5.07e-13	1.73e-10	8.58e-13	1.15e-09	2.28e-13	1.1e-10	3.95e-13	3.91e-10	0.00204	1.11e-09	5.49e-09	0.122	2.04e-08	0.249	2.87e-09	5.93e-12	1.65e-09	1.07e-11	2.5e-09	3.86e-12	1.71e-09	6.39e-12	1.11e-09	0.00241	2.93e-09	3.29e-08	0.206	1.03e-07	FALSE	TRUE	TRUE
O00267	SUPT5H	-0.392	-3.07	-0.0172	0.0223	-0.215	-2.67	0.375	0.414	0.177	3.05	3.09	2.85	0.0395	-0.198	-0.238	3.32e-06	4.38e-17	0.737	0.664	0.000915	2.48e-16	5.34e-06	1.83e-06	0.00388	4.7e-17	3.99e-17	1.1e-16	0.445	0.00173	0.000411	1.69e-05	3.43e-16	0.773	0.716	0.00174	1.94e-15	1.53e-05	8.65e-06	0.00681	5.97e-16	4.28e-16	1.18e-15	0.5	0.00625	0.000835	FALSE	TRUE	FALSE
O00268	TAF4	-0.403	-0.338	0.0208	-0.618	0.594	0.0653	0.424	-0.215	0.997	0.358	-0.281	0.932	-0.639	0.573	1.21	0.00343	0.0104	0.856	0.00011	0.000158	0.571	0.00242	0.078	8.35e-07	0.00728	0.027	1.75e-06	8.1e-05	0.000218	9.12e-08	0.0075	0.0114	0.88	0.000259	0.00034	0.581	0.00446	0.122	2.81e-06	0.00875	0.0298	3.07e-06	0.000195	0.0011	3.96e-07	FALSE	FALSE	FALSE
O00287	RFXAP	NA	NA	NA	NA	NA	NA	NA	NA	NA	1.64	NA	NA	NA	NA	NA	NA	NA	NA	NA	NA	NA	NA	NA	NA	1.5e-05	NA	NA	NA	NA	NA	NA	NA	NA	NA	NA	NA	NA	NA	NA	2.37e-05	NA	NA	NA	NA	NA	FALSE	FALSE	FALSE
O00291	HIP1	0.238	-0.573	-2.33	-0.78	-2.14	-0.811	-2.56	-1.02	-2.38	-1.75	-0.207	-1.57	1.55	0.183	-1.36	0.00182	4.1e-07	1.58e-14	1.15e-08	4.43e-14	7.28e-09	4.61e-15	4.68e-10	1.18e-14	5.54e-13	0.00474	2.2e-12	2.67e-12	0.0101	1.28e-11	0.0043	6.02e-07	2.79e-13	6.3e-08	7.94e-13	1.4e-08	1.42e-13	5.96e-09	3.15e-13	2.53e-12	0.00547	8.57e-12	4.77e-11	0.0271	1.74e-10	FALSE	FALSE	TRUE
O00299	CLIC1	-0.683	-5.23	0.187	-0.358	0.775	-4.55	0.87	0.325	1.46	5.42	4.87	6	-0.545	0.589	1.13	1.6e-06	2.43e-17	0.0402	0.000777	3.93e-07	1.43e-16	1.06e-07	0.00164	2.21e-10	1.56e-17	5.97e-17	4.2e-18	1.72e-05	7.77e-06	4.7e-09	9.12e-06	2e-16	0.0543	0.00154	1.37e-06	1.22e-15	4.38e-07	0.00402	1.67e-09	2.39e-16	5.98e-16	7.42e-17	4.69e-05	6.83e-05	2.86e-08	FALSE	TRUE	FALSE
O00327	ARNTL	-0.491	-1.44	-0.263	-0.765	-0.283	-0.944	0.228	-0.274	0.208	1.17	0.671	1.15	-0.502	-0.0195	0.482	0.000918	1.56e-08	0.039	1.67e-05	0.0284	1.83e-06	0.0684	0.0328	0.0922	1.65e-07	6.09e-05	1.99e-07	0.000774	0.867	0.00106	0.00234	2.63e-08	0.0527	4.61e-05	0.0416	2.71e-06	0.0947	0.0578	0.123	3.3e-07	8.12e-05	3.92e-07	0.00157	0.907	0.00198	FALSE	TRUE	FALSE
O00399	DCTN6	-0.0828	-1.18	-0.0489	0.25	0.00563	-1.09	0.0339	0.332	0.0884	1.13	1.43	1.18	0.298	0.0545	-0.244	0.277	7.68e-10	0.515	0.00467	0.94	1.86e-09	0.65	0.000568	0.247	1.29e-09	7.26e-11	7.25e-10	0.00133	0.468	0.00541	0.351	1.51e-09	0.564	0.00813	0.95	3.9e-09	0.705	0.00156	0.3	3.38e-09	2.02e-10	1.97e-09	0.00255	0.58	0.00894	FALSE	TRUE	FALSE
O00400	SLC33A1	NA	NA	NA	NA	NA	NA	NA	NA	NA	-2.33	0.0825	-2.13	2.42	0.203	-2.21	NA	NA	NA	NA	NA	NA	NA	NA	NA	6.48e-06	0.743	1.25e-05	1.13e-05	0.378	2.12e-05	NA	NA	NA	NA	NA	NA	NA	NA	NA	1.07e-05	0.752	1.99e-05	3.18e-05	0.495	5.58e-05	FALSE	FALSE	FALSE
O00401	WASL	-0.375	-4	-1.03	-0.848	-0.151	-3.62	-0.656	-0.473	0.224	2.96	3.15	3.84	0.184	0.88	0.697	0.00132	1.2e-13	1.72e-07	1.19e-06	0.112	8.48e-15	4.88e-07	1.12e-05	0.00408	7.18e-14	3.78e-14	4.47e-15	0.0128	2.55e-08	2.7e-07	0.00323	4.08e-13	5.46e-07	4.15e-06	0.145	4.45e-14	1.75e-06	4.45e-05	0.00712	3.87e-13	1.85e-13	3.04e-14	0.0204	5.96e-07	1.07e-06	FALSE	TRUE	TRUE
O00410	IPO5	-0.681	-3.57	-0.454	-0.193	-0.171	-2.89	0.227	0.487	0.51	3.11	3.38	3.4	0.261	0.283	0.0225	3.66e-06	7.81e-15	0.000195	0.0469	0.0743	1.13e-13	0.0234	0.000103	6.76e-05	4.35e-14	1.58e-14	1.45e-14	0.0111	0.00684	0.802	1.85e-05	3.36e-14	0.000381	0.0665	0.0996	4.65e-13	0.0358	0.00033	0.000159	2.46e-13	8.37e-14	8.75e-14	0.0179	0.0196	0.83	FALSE	TRUE	FALSE
O00422	SAP18	-0.0994	-0.544	-0.103	0.677	-0.0542	-0.445	-0.0032	0.776	0.0452	0.442	1.22	0.49	0.779	0.0484	-0.731	0.0019	2.45e-11	0.0015	1.62e-12	0.0537	2.94e-10	0.902	2.91e-13	0.0999	3.22e-10	9.63e-16	8.96e-11	2.77e-13	0.0803	6.19e-13	0.00447	5.84e-11	0.00258	3.07e-11	0.0741	6.94e-10	0.921	1.2e-11	0.132	9.22e-10	6.89e-15	2.74e-10	7.37e-12	0.149	1.35e-11	FALSE	FALSE	FALSE
O00423	EML1	-0.229	-3.2	-0.444	-0.229	-0.119	-2.97	-0.215	0.000495	0.11	2.76	2.97	3.08	0.215	0.325	0.109	0.0366	1.21e-13	0.0006	0.0369	0.245	3.08e-13	0.0476	0.996	0.285	7.9e-13	3.07e-13	1.96e-13	0.0472	0.0058	0.287	0.061	4.11e-13	0.0011	0.0538	0.295	1.16e-12	0.0686	0.997	0.341	3.5e-12	1.26e-12	9.37e-13	0.0675	0.017	0.337	FALSE	TRUE	FALSE
O00429	DNM1L	-0.482	-2.71	-0.668	-0.144	-0.58	-2.23	-0.186	0.338	-0.0987	2.05	2.57	2.13	0.524	0.0871	-0.437	0.00575	1.28e-10	0.000533	0.341	0.0016	1.4e-09	0.224	0.0374	0.509	3.99e-09	2.51e-10	2.41e-09	0.00332	0.559	0.0104	0.0118	2.78e-10	0.00098	0.399	0.00292	2.99e-09	0.277	0.0648	0.567	9.82e-09	6.33e-10	6.04e-09	0.00591	0.664	0.0163	FALSE	TRUE	FALSE
O00442	RTCA	-0.418	1.01	-0.453	-0.121	-0.122	1.43	-0.0351	0.297	0.296	-1.46	-1.13	-1.13	0.332	0.332	-0.000932	0.245	0.0117	0.21	0.731	0.729	0.00118	0.92	0.402	0.404	0.000974	0.006	0.00597	0.35	0.352	0.998	0.316	0.0128	0.251	0.777	0.767	0.00138	0.936	0.492	0.464	0.00127	0.00687	0.00721	0.406	0.47	0.999	FALSE	FALSE	FALSE
O00443	PIK3C2A	0.0321	-1.77	-0.374	0.00586	-0.395	-1.8	-0.406	-0.0262	-0.427	1.4	1.78	1.38	0.38	-0.0211	-0.401	0.74	1.24e-10	0.00172	0.952	0.00114	9.94e-11	0.000922	0.786	0.000614	2.23e-09	1.19e-10	2.68e-09	0.00154	0.827	0.00102	0.794	2.69e-10	0.00292	0.959	0.00214	2.54e-10	0.00179	0.838	0.00123	5.69e-09	3.17e-10	6.65e-09	0.00292	0.877	0.00192	FALSE	TRUE	FALSE
O00458	IFRD1	0.368	2.3	0.439	0.443	0.56	1.93	0.0708	0.075	0.191	-1.86	-1.85	-1.74	0.00418	0.121	0.116	4.14e-08	5.45e-18	5.15e-09	4.6e-09	2.71e-10	4.99e-17	0.045	0.0353	4.8e-05	8.03e-17	8.26e-17	1.88e-16	0.898	0.00235	0.00301	4.02e-07	5.41e-17	2.26e-08	2.82e-08	1.89e-09	4.83e-16	0.0652	0.0618	0.000116	9.49e-16	7.97e-16	1.9e-15	0.917	0.00807	0.00519	FALSE	TRUE	FALSE
O00461	GOLIM4	0.0584	-2.99	-1.58	-1.18	-1.63	-3.05	-1.64	-1.24	-1.69	1.41	1.81	1.36	0.407	-0.047	-0.454	0.652	3.31e-12	2.68e-09	5.67e-08	1.98e-09	1.06e-10	6.5e-08	1.1e-06	4.88e-08	9.05e-09	6.48e-10	1.28e-08	0.000863	0.608	0.000376	0.717	8.83e-12	1.25e-08	2.59e-07	1.11e-08	2.68e-10	2.85e-07	5.47e-06	2.12e-07	2.13e-08	1.55e-09	2.9e-08	0.00173	0.705	0.000772	FALSE	TRUE	TRUE
O00469	PLOD2	NA	-2.79	-0.831	0.125	-1.01	NA	NA	NA	NA	1.96	2.91	1.78	0.956	-0.181	-1.14	NA	0.00147	0.208	0.842	0.133	NA	NA	NA	NA	0.00154	9.78e-05	0.00281	0.0551	0.685	0.0279	NA	0.00168	0.249	0.87	0.17	NA	NA	NA	NA	0.00197	0.000128	0.0035	0.0775	0.769	0.0408	FALSE	TRUE	FALSE
O00471	EXOC5	0.0771	-2.72	-0.662	-0.0558	-0.554	-2.8	-0.739	-0.133	-0.631	2.06	2.66	2.17	0.606	0.108	-0.498	0.685	2.46e-09	0.00357	0.768	0.0108	1.75e-09	0.00164	0.487	0.00492	6.68e-08	3.15e-09	3.67e-08	0.00632	0.569	0.0192	0.749	4.52e-09	0.00571	0.808	0.0171	3.69e-09	0.00308	0.579	0.00843	1.4e-07	6.86e-09	7.83e-08	0.0106	0.671	0.0289	FALSE	TRUE	FALSE
O00487	PSMD14	-0.533	-1.53	-0.427	-0.171	-0.266	-0.998	0.106	0.362	0.267	1.1	1.36	1.27	0.256	0.161	-0.0948	0.000495	7.78e-09	0.00271	0.161	0.0383	1.08e-06	0.373	0.00789	0.0374	3.49e-07	3.16e-08	7.34e-08	0.0449	0.185	0.425	0.00136	1.36e-08	0.00442	0.204	0.0547	1.63e-06	0.434	0.0162	0.0544	6.7e-07	6.03e-08	1.52e-07	0.0644	0.288	0.479	FALSE	TRUE	FALSE
O00499	BIN1	-0.496	-4.16	-0.0362	-0.414	0.574	-3.66	0.46	0.0815	1.07	4.12	3.74	4.73	-0.378	0.61	0.988	5.04e-07	2.02e-18	0.51	3.58e-06	9.57e-08	1.01e-17	1.17e-06	0.152	5.38e-11	2.26e-18	7.66e-18	3.92e-19	9.34e-06	4.71e-08	1.43e-10	3.43e-06	2.33e-17	0.56	1.13e-05	3.81e-07	1.23e-16	3.86e-06	0.217	4.72e-10	5.2e-17	1.04e-16	1.14e-17	2.69e-05	9.75e-07	1.36e-09	FALSE	TRUE	FALSE
O00522	KRIT1	-0.551	-2.83	-0.742	-0.0405	-0.741	-2.28	-0.191	0.511	-0.19	2.09	2.79	2.09	0.701	0.000583	-0.701	0.0269	5.9e-08	0.00565	0.854	0.00567	1.56e-08	0.237	0.00662	0.238	3.82e-08	1.93e-09	3.81e-08	0.000804	0.997	0.000809	0.0464	9.41e-08	0.00874	0.879	0.0094	2.88e-08	0.291	0.0139	0.29	8.21e-08	4.33e-09	8.11e-08	0.00162	0.998	0.00156	FALSE	TRUE	FALSE
O00534	VWA5A	-0.749	-4.31	-0.561	-0.484	-0.28	-3.56	0.188	0.265	0.469	3.74	3.82	4.03	0.0773	0.281	0.204	0.00111	5.45e-12	0.00801	0.0182	0.142	5.83e-11	0.314	0.163	0.0214	3.09e-11	2.4e-11	1.26e-11	0.673	0.14	0.275	0.00276	1.41e-11	0.0122	0.0282	0.18	1.54e-10	0.375	0.23	0.0326	1.03e-10	7.23e-11	4.38e-11	0.714	0.23	0.325	FALSE	TRUE	FALSE
O00560	SDCBP	NA	NA	NA	NA	NA	NA	NA	NA	NA	3.17	4.95	3.93	1.78	0.758	-1.02	NA	NA	NA	NA	NA	NA	NA	NA	NA	3.32e-06	5.05e-07	6.98e-06	0.000151	0.026	0.01	NA	NA	NA	NA	NA	NA	NA	NA	NA	5.67e-06	8.36e-07	1.14e-05	0.000348	0.0598	0.0158	FALSE	FALSE	FALSE
O00562	PITPNM1	0.122	-2.45	-0.429	0.055	-0.278	-2.57	-0.552	-0.0673	-0.4	2.02	2.5	2.17	0.484	0.152	-0.333	0.842	0.00191	0.489	0.935	0.653	0.000604	0.326	0.913	0.472	0.00328	0.00164	0.00203	0.437	0.783	0.591	0.877	0.00218	0.54	0.947	0.699	0.000724	0.388	0.936	0.532	0.00407	0.00196	0.00256	0.492	0.846	0.639	FALSE	TRUE	FALSE
O00566	MPHOSPH10	-0.0444	0.92	-0.137	0.183	-0.278	0.965	-0.0929	0.227	-0.234	-1.06	-0.738	-1.2	0.32	-0.141	-0.461	0.636	2.07e-07	0.158	0.0683	0.00974	1.21e-07	0.329	0.0281	0.0244	4.16e-08	2.4e-06	9.51e-09	0.00411	0.148	0.000247	0.703	3.12e-07	0.195	0.0936	0.0155	2.03e-07	0.392	0.0504	0.0367	8.89e-08	3.67e-06	2.19e-08	0.00718	0.241	0.000525	FALSE	FALSE	FALSE
O00567	NOP56	-0.071	0.804	-0.742	-0.087	-0.862	0.875	-0.671	-0.016	-0.791	-1.55	-0.891	-1.67	0.655	-0.12	-0.775	0.00556	1.97e-14	5.38e-14	0.00135	8.18e-15	6.76e-15	1.91e-13	0.467	2.42e-14	5e-18	5.38e-15	1.94e-18	2.58e-13	9.2e-05	3.13e-14	0.0115	7.73e-14	8.36e-13	0.00258	1.77e-13	3.64e-14	3.37e-12	0.559	5.85e-13	1.01e-16	3.17e-14	4.03e-17	6.98e-12	0.000529	1.07e-12	FALSE	FALSE	FALSE
O00571	DDX3X	-0.479	-1.7	-1.13	-0.772	-1.21	-1.22	-0.654	-0.293	-0.729	0.566	0.926	0.491	0.361	-0.0753	-0.436	1.46e-11	1.7e-18	2.9e-16	3.68e-14	1.28e-16	1.13e-16	2.97e-13	5.83e-09	7.54e-14	1.81e-12	3.68e-15	1.08e-11	4.79e-10	0.00402	4.66e-11	6.04e-10	2.01e-17	8.44e-15	1.22e-12	4.53e-15	9.99e-16	4.91e-12	5.29e-08	1.48e-12	7.4e-12	2.25e-14	3.77e-11	3.95e-09	0.0126	5.26e-10	FALSE	TRUE	TRUE
O00622	CCN1	0.0779	0.88	-0.0157	-0.133	0.0057	0.802	-0.0936	-0.211	-0.0722	-0.895	-1.01	-0.874	-0.117	0.0214	0.139	0.172	6.53e-10	0.775	0.0284	0.917	2.01e-09	0.106	0.00183	0.203	5.27e-10	1.16e-10	7.07e-10	0.0486	0.698	0.0233	0.234	1.29e-09	0.808	0.0423	0.932	4.2e-09	0.142	0.00445	0.252	1.47e-09	3.11e-10	1.93e-09	0.0692	0.778	0.0346	FALSE	FALSE	FALSE
O00625	PIR	NA	NA	NA	NA	NA	NA	NA	NA	NA	NA	2.41	0.587	NA	NA	-1.82	NA	NA	NA	NA	NA	NA	NA	NA	NA	NA	0.000969	0.0469	NA	NA	0.00321	NA	NA	NA	NA	NA	NA	NA	NA	NA	NA	0.00117	0.053	NA	NA	0.00551	FALSE	FALSE	FALSE
O00712	NFIB	-0.15	0.926	-0.0231	-0.499	-0.0482	1.08	0.127	-0.349	0.102	-0.949	-1.42	-0.974	-0.476	-0.0252	0.451	0.000254	2.38e-13	0.455	5.13e-10	0.131	3.6e-14	0.00101	3.72e-08	0.00488	1.75e-13	1.04e-15	1.26e-13	9.14e-10	0.416	1.77e-09	0.000757	7.74e-13	0.505	4.23e-09	0.168	1.63e-13	0.00196	2.64e-07	0.00838	8.74e-13	7.36e-15	6.21e-13	6.9e-09	0.532	1.21e-08	FALSE	FALSE	FALSE
O00716	E2F3	-0.235	1.59	0.236	-0.235	0.21	1.82	0.471	-0.000544	0.445	-1.35	-1.82	-1.38	-0.471	-0.0259	0.445	1.07e-05	1.16e-15	1.01e-05	1.05e-05	3.24e-05	2.02e-16	4.18e-09	0.987	8.22e-09	8.88e-15	2.01e-16	6.98e-15	4.12e-09	0.454	8.1e-09	4.74e-05	6.14e-15	2.41e-05	3.03e-05	7.83e-05	1.62e-15	2.36e-08	0.991	4.25e-08	6.03e-14	1.79e-15	4.49e-14	2.56e-08	0.567	4.59e-08	FALSE	TRUE	FALSE
O00743	PPP6C	-0.0123	-1.27	0.763	-0.321	0.37	-1.25	0.776	-0.308	0.383	2.03	0.945	1.64	-1.08	-0.393	0.691	0.897	6.03e-09	1.98e-06	0.00449	0.00164	6.78e-09	1.66e-06	0.00577	0.00129	1.89e-11	1.84e-07	2.69e-10	3.76e-08	0.00105	5.73e-06	0.921	1.06e-08	5.28e-06	0.00784	0.003	1.31e-08	5.34e-06	0.0123	0.00242	6.57e-11	3.21e-07	7.71e-10	1.8e-07	0.00411	1.68e-05	FALSE	TRUE	FALSE
O00763	ACACB	-0.359	-1.87	0.115	-0.0912	-0.0156	-1.51	0.474	0.268	0.344	1.98	1.78	1.85	-0.206	-0.131	0.0756	3.98e-05	1.65e-13	0.0721	0.145	0.795	2.4e-12	2.3e-06	0.000553	6.1e-05	7.78e-14	3.09e-13	1.83e-13	0.00392	0.0447	0.22	0.00015	5.47e-13	0.0938	0.185	0.828	7.78e-12	7.11e-06	0.00152	0.000145	4.16e-13	1.26e-12	8.81e-13	0.00689	0.0929	0.267	FALSE	TRUE	FALSE
O00767	SCD	-0.727	-2.94	-3.11	-0.887	-3.29	-2.22	-2.39	-0.161	-2.57	-0.168	2.06	-0.349	2.23	-0.18	-2.41	0.0005	1.21e-10	6.08e-11	8.59e-05	3.03e-11	3.79e-09	1.57e-09	0.326	6.48e-10	0.303	9.3e-09	0.0452	3.63e-09	0.272	1.42e-09	0.00137	2.62e-10	4.13e-10	0.000206	2.56e-10	7.62e-09	1.01e-08	0.411	4.3e-09	0.322	1.9e-08	0.0511	2.3e-08	0.387	1.01e-08	FALSE	TRUE	TRUE
O14498	ISLR	-0.29	-2.94	-2.68	-0.746	-2.3	-2.65	-2.39	-0.457	-2.01	0.26	2.2	0.638	1.94	0.378	-1.56	0.0565	2.48e-11	7.8e-11	0.000129	5.03e-10	8.92e-11	3.17e-10	0.0058	2.56e-09	0.0824	9.01e-10	0.000503	4.13e-09	0.0172	5.4e-08	0.0891	5.91e-11	5.11e-10	0.000301	3.26e-09	2.3e-10	2.4e-09	0.0124	1.46e-08	0.0912	2.12e-09	0.000674	2.56e-08	0.0425	2.48e-07	FALSE	TRUE	TRUE
O14519	CDK2AP1	0.256	2.58	0.996	-0.234	0.522	2.32	0.739	-0.49	0.266	-1.58	-2.81	-2.06	-1.23	-0.474	0.756	0.00104	4.39e-15	6.25e-10	0.00208	1.18e-06	1.65e-14	2.23e-08	2.34e-06	0.000792	2.03e-12	1.46e-15	7.6e-14	4.69e-11	3.38e-06	1.71e-08	0.00262	2e-14	3.31e-09	0.00387	3.72e-06	8.12e-14	1.07e-07	1.07e-05	0.00155	8.22e-12	9.98e-15	3.89e-13	5.53e-10	3.44e-05	8.95e-08	FALSE	TRUE	FALSE
O14578	CIT	-0.359	-1.7	-1.11	-0.267	-1.13	-1.34	-0.752	0.0918	-0.769	0.587	1.43	0.569	0.843	-0.0178	-0.861	2.12e-06	1.48e-14	3.06e-12	4.41e-05	2.5e-12	2.93e-13	3.81e-10	0.0576	2.86e-10	7.52e-09	1.27e-13	1.09e-08	9.25e-11	0.692	7.15e-11	1.14e-05	5.96e-14	2.86e-11	0.000111	2.74e-11	1.12e-12	2.85e-09	0.0945	2.09e-09	1.78e-08	5.68e-13	2.48e-08	1.01e-09	0.774	7.41e-10	FALSE	TRUE	TRUE
O14579	COPE	NA	NA	NA	NA	NA	-2.57	1.17	-0.0209	2.52	3.74	2.55	5.09	-1.19	1.35	2.54	NA	NA	NA	NA	NA	4.92e-05	0.0225	0.943	0.000453	4.1e-05	5.17e-05	5.69e-06	0.0209	0.0284	0.000432	NA	NA	NA	NA	NA	6.37e-05	0.0345	0.958	0.000926	6.11e-05	6.93e-05	9.43e-06	0.0319	0.0645	0.000874	FALSE	FALSE	FALSE
O14639	ABLIM1	-0.437	-3.7	-3.93	-1.29	-4.05	-3.27	-3.49	-0.853	-3.61	-0.226	2.41	-0.344	2.64	-0.119	-2.76	0.328	1.15e-06	6e-07	0.0104	4.3e-07	4.47e-06	2.19e-06	0.0692	1.52e-06	0.609	9.15e-05	0.438	3.91e-05	0.787	2.54e-05	0.405	1.62e-06	1.72e-06	0.0169	1.49e-06	6.34e-06	6.81e-06	0.111	4.85e-06	0.626	0.00012	0.456	9.95e-05	0.849	6.56e-05	FALSE	TRUE	TRUE
O14647	CHD2	-0.0523	1.06	0.241	0.295	0.221	1.12	0.293	0.347	0.273	-0.824	-0.77	-0.844	0.054	-0.0199	-0.0739	0.198	9.7e-13	3.26e-05	4.13e-06	7.46e-05	5.32e-13	4.38e-06	6.99e-07	9.14e-06	2.37e-11	5.48e-11	1.76e-11	0.185	0.614	0.0777	0.263	2.81e-12	7.14e-05	1.29e-05	0.000168	1.92e-12	1.28e-05	3.66e-06	2.51e-05	8.07e-11	1.56e-10	5.98e-11	0.231	0.709	0.104	FALSE	TRUE	FALSE
O14653	GOSR2	NA	NA	NA	NA	NA	-4.53	-3.8	-1.31	-3.51	0.731	3.23	1.02	2.5	0.289	-2.21	NA	NA	NA	NA	NA	3.41e-11	2.18e-10	1e-05	5e-10	0.00123	1.22e-09	9.03e-05	1.75e-08	0.114	6.14e-08	NA	NA	NA	NA	NA	9.22e-11	1.72e-09	4.04e-05	3.43e-09	0.00159	2.81e-09	0.000131	9e-08	0.195	2.78e-07	FALSE	FALSE	FALSE
O14657	TOR1B	0.0482	-1.79	-1.72	-0.405	-1.63	-1.84	-1.77	-0.453	-1.68	0.068	1.39	0.16	1.32	0.0918	-1.23	0.787	1.65e-07	2.56e-07	0.0379	4.74e-07	1.22e-07	1.87e-07	0.0227	3.42e-07	0.704	2.83e-06	0.378	4.82e-06	0.609	1.02e-05	0.832	2.52e-07	7.81e-07	0.055	1.63e-06	2.04e-07	7.31e-07	0.0417	1.25e-06	0.719	4.29e-06	0.397	1.47e-05	0.705	2.85e-05	FALSE	TRUE	TRUE
O14672	ADAM10	NA	NA	NA	NA	NA	-2.66	-2.33	-0.205	-2.04	0.33	2.46	0.625	2.13	0.295	-1.83	NA	NA	NA	NA	NA	5.62e-06	1.61e-05	0.473	4.6e-05	0.123	6.34e-07	0.0107	2.08e-06	0.162	6.98e-06	NA	NA	NA	NA	NA	7.86e-06	4.23e-05	0.565	0.000112	0.135	1.04e-06	0.0127	6.85e-06	0.259	2e-05	FALSE	FALSE	FALSE
O14727	APAF1	-0.606	-2.17	-0.375	-0.648	-0.33	-1.57	0.231	-0.0419	0.276	1.8	1.53	1.84	-0.273	0.0448	0.318	0.00763	4.22e-07	0.0227	0.00551	0.0373	3.34e-05	0.22	0.838	0.152	3.04e-06	3.97e-05	2.59e-06	0.156	0.758	0.107	0.0151	6.19e-07	0.032	0.00944	0.0534	4.39e-05	0.273	0.878	0.194	5.21e-06	5.37e-05	4.47e-06	0.199	0.828	0.139	FALSE	TRUE	FALSE
O14733	MAP2K7	-0.152	-2.05	-1.92	0.291	-2.18	-1.89	-1.77	0.443	-2.03	0.122	2.34	-0.134	2.21	-0.256	-2.47	0.299	1.31e-06	2.89e-06	0.106	8.66e-07	4.64e-07	1.31e-06	0.0143	2.96e-07	0.266	5.47e-07	0.183	1.15e-06	0.04	3.79e-07	0.374	1.84e-06	7.52e-06	0.14	2.82e-06	7.29e-07	4.28e-06	0.0276	1.09e-06	0.284	9e-07	0.197	4.01e-06	0.085	1.45e-06	FALSE	TRUE	TRUE
O14735	CDIPT	NA	NA	NA	NA	NA	NA	NA	NA	NA	-0.0905	2.86	0.508	2.95	0.598	-2.35	NA	NA	NA	NA	NA	NA	NA	NA	NA	0.0864	8.87e-13	2.34e-06	6.76e-13	6.06e-07	4.86e-12	NA	NA	NA	NA	NA	NA	NA	NA	NA	0.0955	3.33e-12	4.05e-06	1.53e-11	7.97e-06	7.61e-11	FALSE	FALSE	FALSE
O14737	PDCD5	-1.22	-1.96	-0.173	-0.597	1.77	-0.737	1.05	0.625	3	1.79	1.36	3.73	-0.424	1.95	2.37	0.00499	0.000166	0.628	0.114	0.000744	0.0375	0.00639	0.07	3.8e-06	0.000142	0.00116	4.51e-07	0.2	0.000176	3.26e-05	0.0105	0.0002	0.671	0.149	0.00144	0.0406	0.0109	0.112	1.12e-05	0.000199	0.0014	8.52e-07	0.247	0.000922	8.24e-05	FALSE	TRUE	FALSE
O14745	SLC9A3R1	NA	NA	NA	NA	NA	-6.08	-0.174	-1.77	-0.514	5.91	4.31	5.57	-1.6	-0.34	1.26	NA	NA	NA	NA	NA	7.69e-07	0.461	0.000237	0.0671	8.81e-07	7.62e-07	1.16e-06	0.000377	0.182	0.00109	NA	NA	NA	NA	NA	1.18e-06	0.523	0.000701	0.0925	1.62e-06	1.24e-06	2.09e-06	0.000809	0.283	0.00204	FALSE	FALSE	FALSE
O14776	TCERG1	-0.122	-2.64	-0.485	-0.311	-0.334	-2.52	-0.363	-0.189	-0.212	2.16	2.33	2.31	0.174	0.151	-0.0228	0.000483	7.59e-20	1.44e-10	3.02e-08	1.31e-08	1.38e-19	4.85e-09	7.68e-06	2.3e-06	9.93e-19	3.72e-19	4.21e-19	1.84e-05	7.24e-05	0.401	0.00133	1.61e-18	8.72e-10	1.49e-07	6.2e-08	3.58e-18	2.7e-08	3.16e-05	7.11e-06	2.59e-17	8.87e-18	1.21e-17	4.98e-05	0.000438	0.454	FALSE	TRUE	FALSE
O14777	NDC80	-0.487	-5.23	-1.75	1.04	-1.29	-4.74	-1.26	1.53	-0.8	3.48	6.27	3.94	2.79	0.46	-2.33	0.0379	2.87e-08	2.63e-05	0.00145	0.000485	3.59e-07	0.000735	0.000574	0.0123	5.46e-07	7.36e-08	1.02e-06	1.01e-05	0.0559	6.05e-05	0.063	4.69e-08	5.86e-05	0.00275	0.000964	5.72e-07	0.00146	0.00157	0.0196	1.03e-06	1.34e-07	1.85e-06	2.86e-05	0.112	0.000145	FALSE	TRUE	TRUE
O14786	NRP1	-0.714	-0.121	-1.04	-0.255	-0.867	0.593	-0.328	0.459	-0.153	-0.921	-0.135	-0.746	0.786	0.174	-0.612	5.46e-05	0.335	1.1e-06	0.0543	7.85e-06	0.000295	0.0178	0.00225	0.226	4.17e-06	0.284	3.55e-05	2.12e-05	0.171	0.000225	0.000197	0.344	3.05e-06	0.0759	2.09e-05	0.000361	0.0279	0.00536	0.278	7.03e-06	0.297	5.36e-05	5.67e-05	0.27	0.000485	FALSE	FALSE	TRUE
O14787	TNPO2	-0.438	-3.43	-0.26	1.31	-0.424	-3	0.178	1.75	0.014	3.17	4.74	3.01	1.57	-0.164	-1.73	0.591	0.00108	0.725	0.208	0.569	0.00254	0.81	0.104	0.985	0.000867	0.0006	0.00123	0.119	0.804	0.0895	0.663	0.00123	0.763	0.257	0.621	0.00293	0.844	0.157	0.986	0.00114	0.000736	0.00158	0.155	0.859	0.118	FALSE	TRUE	FALSE
O14802	POLR3A	-0.188	-0.981	0.14	-0.0955	0.074	-0.793	0.328	0.0924	0.262	1.12	0.885	1.05	-0.236	-0.0661	0.169	0.0677	1.36e-07	0.161	0.329	0.446	1.47e-06	0.00415	0.344	0.0158	2.89e-08	4.35e-07	5.87e-08	0.0268	0.495	0.0954	0.105	2.09e-07	0.197	0.387	0.505	2.2e-06	0.00733	0.432	0.0245	6.31e-08	7.25e-07	1.22e-07	0.04	0.606	0.125	FALSE	FALSE	FALSE
O14818	PSMA7	-0.435	-2.58	0.0749	0.0378	0.16	-2.14	0.51	0.473	0.595	2.65	2.62	2.74	-0.0371	0.0851	0.122	1.94e-06	7.83e-16	0.181	0.489	0.0101	8.1e-15	3.35e-07	7.79e-07	5.71e-08	5.45e-16	6.51e-16	3.66e-16	0.496	0.133	0.0385	1.06e-05	4.29e-15	0.22	0.547	0.016	4.27e-14	1.24e-06	4.02e-06	2.43e-07	4.99e-15	4.93e-15	3.33e-15	0.55	0.22	0.0548	FALSE	TRUE	FALSE
O14828	SCAMP3	0.0451	-2.99	-3.24	-1.27	-2.63	-3.03	-3.29	-1.31	-2.67	-0.256	1.72	0.358	1.97	0.614	-1.36	0.784	1.64e-09	6.94e-10	8.49e-06	6.17e-09	3.67e-11	1.56e-11	2.13e-07	1.38e-10	0.0457	1.38e-08	0.0093	3.29e-09	0.000229	1.48e-07	0.829	3.09e-09	3.64e-09	2.49e-05	3.1e-08	9.89e-11	1.68e-10	1.27e-06	1.09e-09	0.0519	2.74e-08	0.0111	2.11e-08	0.00115	6.2e-07	FALSE	TRUE	TRUE
O14907	TAX1BP3	NA	NA	NA	NA	NA	NA	NA	NA	NA	2.15	2.74	2.75	0.585	0.599	0.0131	NA	NA	NA	NA	NA	NA	NA	NA	NA	6.14e-06	1.99e-06	5.85e-06	0.00332	0.00693	0.925	NA	NA	NA	NA	NA	NA	NA	NA	NA	1.01e-05	3.07e-06	9.67e-06	0.00592	0.0198	0.934	FALSE	FALSE	FALSE
O14908	GIPC1	NA	NA	NA	NA	NA	-4.5	-0.445	-0.222	-0.383	4.06	4.28	4.12	0.223	0.0622	-0.161	NA	NA	NA	NA	NA	0.000122	0.198	0.539	0.313	7.57e-05	0.000148	0.00017	0.48	0.838	0.652	NA	NA	NA	NA	NA	0.000154	0.249	0.626	0.371	0.000109	0.00019	0.000238	0.535	0.886	0.695	FALSE	FALSE	FALSE
O14920	IKBKB	NA	NA	NA	NA	NA	-2.04	-0.209	1.46	0.63	1.83	3.5	2.67	1.67	0.839	-0.832	NA	NA	NA	NA	NA	0.00333	0.606	0.0197	0.128	0.00484	0.000483	0.000552	0.0129	0.0644	0.0656	NA	NA	NA	NA	NA	0.00382	0.664	0.0366	0.165	0.00592	0.000599	0.000737	0.0204	0.125	0.0894	FALSE	FALSE	FALSE
O14929	HAT1	-0.777	-3.27	0.0296	0.589	-0.15	-2.5	0.807	1.37	0.627	3.3	3.86	3.12	0.559	-0.18	-0.739	0.00322	8.58e-09	0.888	0.0247	0.481	4.4e-08	0.00117	4.19e-05	0.00611	2.46e-09	1.54e-09	4.4e-09	0.0205	0.35	0.00442	0.00712	1.49e-08	0.905	0.0372	0.539	7.72e-08	0.00224	0.000146	0.0103	6.23e-09	3.51e-09	1.06e-08	0.0314	0.468	0.00743	FALSE	TRUE	FALSE
O14949	UQCRQ	NA	NA	NA	NA	NA	NA	NA	NA	NA	-1.94	0.578	-1.77	2.52	0.171	-2.35	NA	NA	NA	NA	NA	NA	NA	NA	NA	9.15e-06	0.0414	1.66e-05	1.58e-05	0.329	2.48e-05	NA	NA	NA	NA	NA	NA	NA	NA	NA	1.48e-05	0.0452	2.6e-05	4.34e-05	0.447	6.43e-05	FALSE	FALSE	FALSE
O14950	MYL12B	-0.458	-1.88	-2.02	0.227	-2.78	-1.42	-1.56	0.685	-2.32	-0.146	2.1	-0.905	2.25	-0.759	-3.01	5.25e-05	4.72e-12	1.85e-12	0.0115	3.38e-14	1.52e-10	4.52e-11	8.04e-07	3.26e-13	0.0802	1.13e-12	3.34e-08	4.88e-13	2.56e-07	1.26e-14	0.000191	1.24e-11	1.85e-11	0.0186	6.26e-13	3.76e-10	4.27e-10	4.12e-06	5.37e-12	0.089	4.17e-12	7.16e-08	1.15e-11	3.93e-06	4.85e-13	FALSE	TRUE	TRUE
O14964	HGS	0.838	-2.23	0.366	1.72	0.437	-3.06	-0.472	0.881	-0.401	2.59	3.95	2.66	1.35	0.0715	-1.28	0.049	0.000115	0.354	0.000882	0.272	2.35e-07	0.105	0.00731	0.162	1.22e-06	1.82e-08	9.35e-07	0.000391	0.794	0.000594	0.0785	0.00014	0.404	0.00173	0.325	3.81e-07	0.141	0.0151	0.205	2.2e-06	3.57e-08	1.7e-06	0.000837	0.852	0.00117	FALSE	TRUE	FALSE
O14974	PPP1R12A	-0.542	-2.13	-2.98	-0.834	-3.08	-1.58	-2.44	-0.291	-2.54	-0.856	1.29	-0.959	2.15	-0.104	-2.25	5.73e-09	2.37e-16	3.25e-18	3.03e-11	2.11e-18	9.84e-15	4.15e-17	6.55e-06	2.45e-17	2.19e-11	1.27e-13	5.28e-12	2.08e-16	0.0218	1.14e-16	7.82e-08	1.5e-15	1.95e-16	3.79e-10	1.34e-16	5.12e-14	2.3e-15	2.72e-05	1.51e-15	7.54e-11	5.68e-13	1.93e-11	1.89e-14	0.0519	1.24e-14	FALSE	TRUE	TRUE
O14976	GAK	NA	NA	NA	NA	NA	-1.47	NA	NA	-1.53	NA	NA	-0.0602	NA	NA	NA	NA	NA	NA	NA	NA	2.04e-05	NA	NA	3.16e-05	NA	NA	0.0841	NA	NA	NA	NA	NA	NA	NA	NA	2.72e-05	NA	NA	7.89e-05	NA	NA	0.0934	NA	NA	NA	FALSE	FALSE	FALSE
O14980	XPO1	-0.789	-4	-0.858	-0.152	-0.364	-3.21	-0.0693	0.637	0.425	3.14	3.85	3.64	0.706	0.494	-0.212	9.39e-08	1.84e-16	3.52e-08	0.0593	0.000274	2.96e-15	0.362	1.05e-06	6.8e-05	3.9e-15	3e-16	6.15e-16	3.31e-07	1.55e-05	0.0127	7.97e-07	1.2e-15	1.28e-07	0.0823	0.000567	1.78e-14	0.423	5.26e-06	0.00016	2.93e-14	2.5e-15	5.23e-15	1.3e-06	0.000123	0.0198	FALSE	TRUE	FALSE
O14981	BTAF1	0.0411	-2.53	-0.115	0.425	0.0142	-2.58	-0.157	0.384	-0.0269	2.42	2.96	2.55	0.54	0.13	-0.411	0.802	1e-09	0.485	0.0206	0.931	8.26e-10	0.348	0.0332	0.87	1.77e-09	1.51e-10	9.39e-10	0.00524	0.434	0.0243	0.844	1.94e-09	0.536	0.0314	0.943	1.82e-09	0.41	0.0585	0.889	4.56e-09	3.97e-10	2.5e-09	0.00898	0.551	0.0359	FALSE	TRUE	FALSE
O15014	ZNF609	0.193	-1.48	0.231	0.214	0.211	-1.67	0.0371	0.0205	0.0173	1.71	1.69	1.69	-0.0166	-0.0198	-0.00316	0.142	5.97e-08	0.0857	0.146	0.112	1.55e-08	0.768	0.884	0.89	1.21e-08	4.62e-08	1.38e-08	0.906	0.875	0.982	0.198	9.5e-08	0.11	0.187	0.146	2.86e-08	0.808	0.913	0.907	2.79e-08	8.62e-08	3.09e-08	0.923	0.911	0.985	FALSE	TRUE	FALSE
O15031	PLXNB2	NA	NA	NA	NA	NA	-0.798	-1.01	1.15	-0.485	-0.212	1.94	0.313	2.16	0.525	-1.63	NA	NA	NA	NA	NA	2.62e-05	3.42e-06	1.11e-06	0.0012	0.0521	2.87e-09	0.00893	1.07e-09	0.000302	1.51e-08	NA	NA	NA	NA	NA	3.47e-05	1.02e-05	5.48e-06	0.00227	0.0588	6.26e-09	0.0107	7.86e-09	0.00143	7.96e-08	FALSE	FALSE	FALSE
O15066	KIF3B	-1.41	-4.84	-0.97	-1.64	-1.72	-3.43	0.439	-0.226	-0.307	3.87	3.21	3.12	-0.665	-0.746	-0.081	0.00654	1.15e-07	0.0428	0.0025	0.00179	1.35e-06	0.273	0.565	0.437	3.82e-07	2.71e-06	3.51e-06	0.108	0.0751	0.836	0.0133	1.78e-07	0.0576	0.00458	0.00324	2.02e-06	0.331	0.65	0.497	7.29e-07	4.12e-06	5.97e-06	0.142	0.141	0.858	FALSE	TRUE	FALSE
O15067	PFAS	-0.784	-5.2	NA	-2.18	-0.545	-4.42	NA	-1.39	0.239	NA	3.03	4.66	NA	NA	1.63	0.0133	3.05e-06	NA	0.000436	0.0833	1.29e-06	NA	0.00128	0.296	NA	3.81e-05	5.12e-06	NA	NA	0.00155	0.0251	4.15e-06	NA	0.000914	0.111	1.94e-06	NA	0.00322	0.354	NA	5.18e-05	8.53e-06	NA	NA	0.00283	FALSE	TRUE	FALSE
O15075	DCLK1	-0.181	-1.9	-1.43	-0.528	-1.13	-1.72	-1.25	-0.347	-0.945	0.466	1.37	0.772	0.904	0.306	-0.598	0.000114	9.37e-17	3.31e-15	8.41e-10	6.89e-14	3.33e-16	1.82e-14	1.22e-07	6.21e-13	3.77e-09	5.78e-15	7.73e-12	1.08e-12	5.04e-07	1.83e-10	0.000378	6.63e-16	7.29e-14	6.52e-09	1.15e-12	2.49e-15	4.3e-13	7.76e-07	9.45e-12	9.33e-09	3.38e-14	2.75e-11	2.19e-11	6.85e-06	1.68e-09	FALSE	TRUE	TRUE
O15078	CEP290	-0.405	0.616	-0.467	-0.826	-0.172	1.02	-0.0625	-0.421	0.233	-1.08	-1.44	-0.788	-0.358	0.296	0.654	1.82e-06	1.52e-08	3.71e-07	4.48e-10	0.00401	3.29e-11	0.225	1.19e-06	0.000395	1.58e-11	4.45e-13	7.95e-10	6.67e-06	4.6e-05	7.46e-09	1.01e-05	2.57e-08	1.11e-06	3.8e-09	0.00682	8.92e-11	0.278	5.82e-06	0.000815	5.56e-11	1.75e-12	2.14e-09	1.96e-05	0.000301	4.26e-08	FALSE	FALSE	FALSE
O15083	ERC2	NA	NA	NA	NA	NA	NA	NA	NA	NA	-2.37	NA	-2.24	NA	0.136	NA	NA	NA	NA	NA	NA	NA	NA	NA	NA	2.71e-05	NA	3.93e-05	NA	0.584	NA	NA	NA	NA	NA	NA	NA	NA	NA	NA	4.14e-05	NA	5.91e-05	NA	0.684	NA	FALSE	FALSE	FALSE
O15111	CHUK	-0.837	-2.63	-1.11	-1.33	-0.585	-1.8	-0.269	-0.494	0.252	1.53	1.3	2.05	-0.225	0.521	0.746	0.0695	0.000517	0.0727	0.0402	0.292	0.00203	0.593	0.34	0.616	0.0195	0.0354	0.00561	0.712	0.407	0.249	0.107	0.000604	0.0944	0.0579	0.346	0.00235	0.652	0.427	0.666	0.0227	0.0388	0.00679	0.751	0.523	0.298	FALSE	TRUE	FALSE
O15126	SCAMP1	2.79	-0.857	-1.03	1.54	-0.453	-3.65	-3.82	-1.25	-3.25	-0.169	2.4	0.405	2.57	0.574	-1.99	1.61e-08	4.59e-05	1.01e-05	2.65e-07	0.00456	7.25e-10	4.7e-10	1.37e-05	2.22e-09	0.158	1.46e-09	0.00455	7.63e-10	0.000443	8.45e-09	1.84e-07	5.75e-05	2.41e-05	1.06e-06	0.00767	1.61e-09	3.46e-09	5.31e-05	1.29e-08	0.172	3.34e-09	0.00556	5.96e-09	0.002	4.75e-08	TRUE	FALSE	TRUE
O15143	ARPC1B	-0.449	-4.77	-2.02	-0.722	-1.92	-4.33	-1.57	-0.273	-1.47	2.75	4.05	2.85	1.3	0.102	-1.2	3.17e-08	4.69e-21	2.56e-16	1.04e-10	4.92e-16	1.64e-20	6.13e-15	8.15e-06	1.43e-14	5.09e-18	3.76e-20	3.21e-18	6.78e-14	0.0192	1.89e-13	3.2e-07	1.92e-19	7.63e-15	1.07e-09	1.45e-14	8.6e-19	1.78e-13	3.34e-05	3.68e-13	1.02e-16	1.56e-18	6.02e-17	2.23e-12	0.0466	4.79e-12	FALSE	TRUE	TRUE
O15144	ARPC2	-0.52	-4.94	-2.01	-0.543	-2	-4.42	-1.49	-0.023	-1.48	2.93	4.4	2.94	1.47	0.00745	-1.46	3.27e-08	2.01e-20	1.81e-15	1.97e-08	1.89e-15	8.24e-20	7.89e-14	0.611	8.4e-14	1.52e-17	8.81e-20	1.47e-17	9.59e-14	0.868	1.02e-13	3.28e-07	5.53e-19	4.43e-14	1.01e-07	4.72e-14	2.47e-18	1.57e-12	0.693	1.59e-12	2.35e-16	3.05e-18	2.04e-16	3.03e-12	0.907	2.9e-12	FALSE	TRUE	TRUE
O15145	ARPC3	-0.0464	-2.73	-1.73	-0.304	-1.68	-2.69	-1.68	-0.258	-1.64	1.01	2.43	1.05	1.42	0.0445	-1.38	0.794	1.03e-09	2.33e-07	0.104	3.13e-07	1.27e-09	3.17e-07	0.163	4.29e-07	6.75e-05	4.26e-09	4.47e-05	2e-06	0.802	2.81e-06	0.837	1.99e-09	7.14e-07	0.137	1.12e-06	2.72e-09	1.18e-06	0.23	1.53e-06	9.84e-05	9.14e-09	6.66e-05	6.62e-06	0.858	8.93e-06	FALSE	TRUE	TRUE
O15156	ZBTB7B	NA	-2.35	-1	0.586	-0.556	NA	NA	NA	NA	1.35	2.94	1.8	1.59	0.445	-1.14	NA	0.000511	0.0257	0.205	0.171	NA	NA	NA	NA	0.00147	0.000157	0.000612	0.00361	0.146	0.0194	NA	0.000597	0.036	0.253	0.212	NA	NA	NA	NA	0.00189	0.000203	0.000813	0.00639	0.237	0.0291	FALSE	TRUE	FALSE
O15160	POLR1C	-0.211	-0.945	-1.35	-0.862	-1.2	-0.734	-1.14	-0.651	-0.989	-0.402	0.0832	-0.255	0.486	0.147	-0.338	0.0139	1.3e-08	1.78e-10	3.84e-08	7.33e-10	2.46e-07	1.43e-09	9.45e-07	7.57e-09	0.000125	0.283	0.00451	2.07e-05	0.0692	0.000563	0.0261	2.21e-08	1.06e-09	1.83e-07	4.55e-09	3.99e-07	9.25e-09	4.77e-06	3.95e-08	0.000177	0.295	0.00551	5.54e-05	0.132	0.00112	FALSE	FALSE	TRUE
O15173	PGRMC2	NA	NA	NA	NA	NA	-4.38	-5.1	-2.73	-4.86	-0.723	1.65	-0.482	2.37	0.241	-2.13	NA	NA	NA	NA	NA	3.13e-11	6.2e-12	4.47e-09	1.03e-11	0.000981	7.18e-07	0.0125	1.87e-08	0.164	5.56e-08	NA	NA	NA	NA	NA	8.51e-11	7.55e-11	4.25e-08	1.14e-10	0.00128	1.17e-06	0.0148	9.55e-08	0.26	2.54e-07	FALSE	FALSE	FALSE
O15182	CETN3	-0.614	-0.618	-1.95	-0.983	-1.68	-0.0033	-1.34	-0.369	-1.06	-1.34	-0.366	-1.06	0.971	0.276	-0.696	0.00182	0.00175	1.67e-08	3.15e-05	9.87e-08	0.984	1.25e-06	0.0353	1.43e-05	1.28e-06	0.0367	1.47e-05	3.55e-05	0.103	0.000703	0.00432	0.002	6.55e-08	8.18e-05	3.92e-07	0.984	4.1e-06	0.0617	3.78e-05	2.31e-06	0.0402	2.32e-05	9.14e-05	0.18	0.00137	FALSE	FALSE	TRUE
O15212	PFDN6	-0.307	1.76	-0.254	-0.132	0.0763	2.07	0.0536	0.175	0.383	-2.01	-1.89	-1.68	0.121	0.33	0.209	0.0053	8.84e-11	0.0162	0.172	0.42	1.21e-11	0.568	0.0789	0.00111	1.67e-11	3.61e-11	1.53e-10	0.209	0.00331	0.0405	0.011	1.95e-10	0.0233	0.216	0.478	3.47e-11	0.628	0.124	0.00211	5.88e-11	1.06e-10	4.52e-10	0.257	0.0107	0.0573	FALSE	TRUE	FALSE
O15213	WDR46	0.13	1.53	0.0924	0.388	0.055	1.4	-0.0374	0.258	-0.0749	-1.44	-1.14	-1.48	0.295	-0.0374	-0.333	0.101	3.33e-11	0.231	0.000162	0.468	9.94e-11	0.619	0.00399	0.327	7.19e-11	1.19e-09	5.23e-11	0.00153	0.619	0.000603	0.148	7.78e-11	0.274	0.000372	0.527	2.54e-10	0.677	0.00888	0.385	2.28e-10	2.76e-09	1.65e-10	0.00291	0.714	0.00119	FALSE	TRUE	FALSE
O15226	NKRF	0.192	3.05	0.509	0.268	0.315	2.86	0.318	0.0759	0.124	-2.54	-2.78	-2.73	-0.242	-0.194	0.0476	4.34e-06	7.37e-21	4.71e-11	1.07e-07	1.59e-08	1.68e-20	1.45e-08	0.0101	0.000305	7.51e-20	2.37e-20	2.95e-20	3.43e-07	3.79e-06	0.0817	2.14e-05	2.57e-19	3.29e-10	4.66e-07	7.44e-08	8.6e-19	7.34e-08	0.0202	0.000644	3.84e-18	1.16e-18	1.51e-18	1.34e-06	3.8e-05	0.109	FALSE	TRUE	FALSE
O15230	LAMA5	-0.102	-1.04	-0.942	-0.209	-0.555	-0.942	-0.84	-0.107	-0.452	0.102	0.834	0.489	0.732	0.387	-0.345	0.497	8.52e-06	2.42e-05	0.176	0.0023	2.42e-05	7.34e-05	0.477	0.00868	0.498	7.78e-05	0.00539	0.000253	0.0203	0.0347	0.573	1.12e-05	5.43e-05	0.221	0.00409	3.21e-05	0.00017	0.569	0.0142	0.516	0.000103	0.00653	0.000559	0.0489	0.0499	FALSE	TRUE	FALSE
O15258	RER1	NA	NA	NA	NA	NA	-4.72	-4.05	-1.96	-3.06	0.675	2.76	1.67	2.09	0.992	-1.1	NA	NA	NA	NA	NA	3.64e-14	1.89e-13	4.12e-10	3.76e-12	1.71e-05	1.09e-11	2.23e-09	2.1e-10	4.4e-07	1.61e-07	NA	NA	NA	NA	NA	1.65e-13	3.36e-12	5.36e-09	4.66e-11	2.68e-05	3.46e-11	5.61e-09	2e-09	6.12e-06	6.71e-07	FALSE	FALSE	FALSE
O15260	SURF4	NA	NA	NA	NA	NA	-3.17	-2.66	0.524	-2.23	0.503	3.69	0.937	3.19	0.434	-2.75	NA	NA	NA	NA	NA	0.00201	0.00528	0.497	0.0129	0.335	0.000173	0.0934	0.000455	0.403	0.00114	NA	NA	NA	NA	NA	0.00233	0.00913	0.588	0.0204	0.354	0.000223	0.103	0.000959	0.519	0.00212	FALSE	FALSE	FALSE
O15269	SPTLC1	-0.545	-3.81	-5.31	-2.69	-5.17	-3.27	-4.76	-2.15	-4.63	-1.5	1.12	-1.36	2.61	0.136	-2.48	0.0136	1.27e-09	7.27e-11	2.49e-08	9.11e-11	4.79e-09	1.86e-10	1.69e-07	2.39e-10	1.93e-07	2.18e-06	4.3e-07	1.66e-09	0.215	2.63e-09	0.0256	2.42e-09	4.83e-10	1.25e-07	6.95e-10	9.54e-09	1.49e-09	1.05e-06	1.79e-09	3.85e-07	3.35e-06	8.15e-07	1.17e-08	0.324	1.7e-08	FALSE	TRUE	TRUE
O15270	SPTLC2	NA	NA	NA	NA	NA	-2.97	-4.28	-1.36	-3.9	-1.31	1.61	-0.929	2.92	0.381	-2.54	NA	NA	NA	NA	NA	2.04e-07	4.9e-09	0.00026	1.28e-08	0.000351	6.51e-05	0.00401	2.41e-07	0.164	9.59e-07	NA	NA	NA	NA	NA	3.33e-07	2.72e-08	0.000764	6.33e-08	0.000478	8.66e-05	0.00491	9.76e-07	0.26	3.32e-06	FALSE	FALSE	FALSE
O15294	OGT	-0.427	-3	0.0242	-0.296	0.185	-2.58	0.451	0.131	0.612	3.03	2.71	3.19	-0.32	0.161	0.481	3.79e-05	3.41e-15	0.733	0.000956	0.0195	2.36e-14	2.2e-05	0.0822	8.82e-07	3.09e-15	1.27e-14	1.6e-15	0.000508	0.0375	1.15e-05	0.000145	1.59e-14	0.769	0.00186	0.0295	1.11e-13	5.62e-05	0.128	2.95e-06	2.37e-14	6.88e-14	1.25e-14	0.00106	0.081	3.17e-05	FALSE	TRUE	FALSE
O15305	PMM2	-0.17	-3.7	-0.394	-0.11	0.518	-3.53	-0.224	0.0607	0.689	3.31	3.59	4.22	0.284	0.912	0.628	0.289	2.38e-09	0.0289	0.524	0.0313	1.36e-09	0.133	0.697	0.00596	2.39e-09	3.08e-09	5.81e-09	0.0932	0.00109	0.0131	0.363	4.38e-09	0.0401	0.583	0.0456	2.92e-09	0.174	0.767	0.01	6.08e-09	6.7e-09	1.37e-08	0.124	0.00424	0.0204	FALSE	TRUE	FALSE
O15321	TM9SF1	0.393	-3.5	-2.2	-1.23	-1.5	-3.89	-2.6	-1.63	-1.89	1.29	2.26	2	0.97	0.705	-0.264	0.577	0.000651	0.00898	0.153	0.0474	6.75e-05	0.000961	0.0435	0.00591	0.0215	0.00786	0.00236	0.167	0.157	0.689	0.65	0.000755	0.0135	0.195	0.0661	8.66e-05	0.00187	0.0739	0.00996	0.0249	0.00896	0.00295	0.21	0.252	0.728	FALSE	TRUE	FALSE
O15344	MID1	-0.0241	-2.76	-1.26	-0.707	-0.988	-2.73	-1.24	-0.682	-0.964	1.49	2.05	1.77	0.555	0.273	-0.282	0.965	0.000288	0.0386	0.217	0.0937	0.000119	0.0257	0.185	0.0704	0.00969	0.00123	0.00346	0.275	0.584	0.572	0.973	0.000341	0.0523	0.267	0.123	0.00015	0.039	0.256	0.0967	0.0116	0.00148	0.00427	0.326	0.684	0.622	FALSE	TRUE	FALSE
O15347	HMGB3	-0.497	-4.84	-0.401	-0.579	0.000327	-4.34	0.0961	-0.0818	0.498	4.44	4.26	4.84	-0.178	0.401	0.579	0.00111	7.28e-15	0.00506	0.00032	0.998	2.86e-14	0.433	0.503	0.0011	2.17e-14	3.63e-14	7.27e-15	0.158	0.00503	0.000318	0.00275	3.16e-14	0.00788	0.000689	0.998	1.32e-13	0.495	0.593	0.0021	1.32e-13	1.78e-13	4.66e-14	0.201	0.0151	0.000662	FALSE	TRUE	FALSE
O15355	PPM1G	-0.526	-3.19	0.121	-0.466	0.174	-2.66	0.647	0.0601	0.7	3.31	2.72	3.36	-0.587	0.0534	0.64	8.99e-08	1.84e-17	0.0276	3.6e-07	0.00345	1.81e-16	7.89e-09	0.239	3.05e-09	1.14e-17	1.36e-16	9.34e-18	2.5e-08	0.293	8.94e-09	7.71e-07	1.57e-16	0.0384	1.39e-06	0.00593	1.47e-15	4.19e-08	0.319	1.71e-08	1.86e-16	1.25e-15	1.39e-16	1.25e-07	0.41	5e-08	FALSE	TRUE	FALSE
O15357	INPPL1	-0.84	-3.16	-1.92	-1.24	-2.37	-2.32	-1.08	-0.396	-1.53	1.24	1.92	0.792	0.68	-0.451	-1.13	0.0917	1.61e-05	0.00175	0.012	0.000396	0.000461	0.0542	0.398	0.0115	0.0203	0.000796	0.109	0.162	0.381	0.031	0.137	2.08e-05	0.00296	0.0194	0.000799	0.000558	0.0771	0.489	0.0184	0.0237	0.000969	0.12	0.205	0.497	0.0449	FALSE	TRUE	TRUE
O15371	EIF3D	-0.231	-0.671	0.192	-0.675	0.382	-0.44	0.424	-0.443	0.613	0.864	-0.00339	1.05	-0.867	0.189	1.06	6.84e-09	1.27e-14	6.02e-08	1.19e-14	1.51e-11	2.56e-12	4.12e-12	2.33e-12	4e-14	5.27e-16	0.847	4.28e-17	5.01e-16	7.19e-08	4.1e-17	9.02e-08	5.23e-14	2.11e-07	4.79e-13	1.35e-10	8.27e-12	5.2e-11	6.65e-11	8.55e-13	4.87e-15	0.853	5.08e-16	3.54e-14	1.37e-06	5.77e-15	FALSE	FALSE	FALSE
O15379	HDAC3	-0.0098	-1.27	0.127	0.0703	0.105	-1.26	0.137	0.0801	0.115	1.39	1.34	1.37	-0.0572	-0.0226	0.0346	0.943	4.29e-07	0.361	0.61	0.45	4.68e-07	0.326	0.562	0.409	1.44e-07	2.33e-07	1.74e-07	0.678	0.869	0.801	0.957	6.27e-07	0.41	0.665	0.508	7.34e-07	0.388	0.648	0.47	2.91e-07	4.01e-07	3.45e-07	0.718	0.908	0.829	FALSE	TRUE	FALSE
O15397	IPO8	-0.41	-2.19	0.542	0.991	0.276	-1.78	0.952	1.4	0.686	2.73	3.18	2.46	0.449	-0.266	-0.715	0.136	3.94e-06	0.0574	0.0192	0.303	2.67e-05	0.00342	0.00263	0.0213	4.62e-07	3.04e-06	1.26e-06	0.239	0.319	0.0731	0.191	5.3e-06	0.0757	0.0295	0.357	3.53e-05	0.00612	0.00616	0.0324	8.75e-07	4.61e-06	2.25e-06	0.289	0.438	0.0985	FALSE	TRUE	FALSE
O15400	STX7	NA	NA	NA	NA	NA	NA	NA	NA	NA	0.573	3.51	2.05	2.94	1.47	-1.47	NA	NA	NA	NA	NA	NA	NA	NA	NA	0.0291	9.24e-08	7.98e-06	4.13e-07	0.000101	0.000106	NA	NA	NA	NA	NA	NA	NA	NA	NA	0.0334	1.66e-07	1.3e-05	1.58e-06	0.000572	0.000242	FALSE	FALSE	FALSE
O15431	SLC31A1	NA	NA	NA	NA	NA	NA	NA	NA	NA	1.72	NA	3.25	NA	1.53	NA	NA	NA	NA	NA	NA	NA	NA	NA	NA	0.0376	NA	0.00435	NA	0.0774	NA	NA	NA	NA	NA	NA	NA	NA	NA	NA	0.0429	NA	0.00532	NA	0.144	NA	FALSE	FALSE	FALSE
O15460	P4HA2	-0.173	-1.14	-0.872	-0.678	-0.872	-0.969	-0.699	-0.506	-0.699	0.269	0.463	0.27	0.194	0.000378	-0.194	0.0127	9.24e-11	2.46e-09	4.87e-08	2.48e-09	6.88e-10	3.39e-08	1.36e-06	3.42e-08	0.000603	3.48e-06	0.000596	0.00642	0.995	0.00649	0.024	2.03e-10	1.16e-08	2.26e-07	1.36e-08	1.53e-09	1.57e-07	6.54e-06	1.52e-07	0.000804	5.24e-06	0.000793	0.0108	0.997	0.0106	FALSE	TRUE	FALSE
O15498	YKT6	0.124	-2.13	-0.529	0.351	-0.447	-2.26	-0.653	0.227	-0.571	1.6	2.48	1.69	0.88	0.0825	-0.798	0.0909	1.95e-13	3.39e-06	0.000193	1.96e-05	9.59e-14	3.35e-07	0.00543	1.5e-06	6.93e-12	2.87e-14	3.71e-12	1.05e-08	0.246	3.36e-08	0.136	6.4e-13	8.76e-06	0.000434	4.89e-05	4.04e-13	1.24e-06	0.0117	4.79e-06	2.57e-11	1.46e-13	1.39e-11	5.9e-08	0.357	1.61e-07	FALSE	TRUE	FALSE
O15511	ARPC5	-0.401	-3.91	-1.47	-0.141	-0.413	-3.51	-1.07	0.26	-0.0124	2.44	3.77	3.5	1.33	1.06	-0.272	0.000635	2.91e-15	5.68e-10	0.138	0.000494	1.14e-14	2.56e-08	0.0123	0.891	1.12e-12	4.63e-15	1.19e-14	1.93e-09	2.93e-08	0.00946	0.00168	1.38e-14	3.04e-09	0.177	0.000981	5.81e-14	1.23e-07	0.0241	0.907	4.81e-12	2.78e-14	7.29e-14	1.33e-08	6.59e-07	0.015	FALSE	TRUE	TRUE
O15516	CLOCK	-0.933	-2.5	-0.323	-0.981	-0.503	-1.57	0.61	-0.0473	0.431	2.18	1.52	2	-0.658	-0.18	0.478	0.00288	6.81e-07	0.212	0.00207	0.0636	2.17e-06	0.00472	0.788	0.0297	8.52e-08	2.91e-06	2.02e-07	0.00294	0.318	0.0183	0.00645	9.76e-07	0.253	0.00385	0.0867	3.18e-06	0.00824	0.839	0.0442	1.76e-07	4.41e-06	3.97e-07	0.00529	0.437	0.0276	FALSE	TRUE	FALSE
O15530	PDPK1	NA	NA	NA	NA	NA	-1.89	0.231	0.406	NA	2.12	2.3	NA	0.175	NA	NA	NA	NA	NA	NA	NA	0.0049	0.632	0.448	NA	0.00148	0.00177	NA	0.715	NA	NA	NA	NA	NA	NA	NA	0.00556	0.688	0.54	NA	0.0019	0.0021	NA	0.753	NA	NA	FALSE	FALSE	FALSE
O15550	KDM6A	-0.666	-1.32	-0.299	-0.596	-0.04	-0.649	0.368	0.0707	0.627	1.02	0.719	1.28	-0.297	0.259	0.556	0.00303	7.79e-06	0.126	0.00632	0.83	0.00364	0.0656	0.705	0.00459	9.86e-05	0.00176	1.07e-05	0.128	0.18	0.00959	0.00675	1.03e-05	0.158	0.0107	0.859	0.00416	0.0914	0.773	0.00793	0.000141	0.00208	1.72e-05	0.166	0.281	0.0152	FALSE	TRUE	FALSE
O43148	RNMT	-0.461	-4.12	-0.719	-0.635	-0.158	-3.66	-0.257	-0.173	0.303	3.41	3.49	3.97	0.084	0.56	0.477	0.0119	1.91e-12	0.00056	0.00149	0.334	8.39e-12	0.127	0.291	0.0769	2.08e-11	1.53e-11	3.12e-12	0.603	0.0036	0.00994	0.0227	5.29e-12	0.00103	0.00282	0.391	2.46e-11	0.166	0.376	0.104	7.14e-11	4.77e-11	1.18e-11	0.65	0.0114	0.0157	FALSE	TRUE	FALSE
O43149	ZZEF1	0.714	-0.457	0.596	0.848	0.563	-1.17	-0.118	0.134	-0.152	1.05	1.31	1.02	0.252	-0.0334	-0.285	9.03e-05	0.000374	0.000297	8.16e-05	0.000367	4.89e-06	0.0432	0.0303	0.0207	1.73e-05	7.83e-06	1.95e-05	0.00633	0.504	0.00413	0.000308	0.000441	0.000567	0.000197	0.000743	6.88e-06	0.0628	0.0539	0.0315	2.72e-05	1.14e-05	3.04e-05	0.0107	0.614	0.00698	FALSE	FALSE	FALSE
O43155	FLRT2	NA	NA	NA	NA	NA	NA	NA	NA	NA	2.13	3.93	2.48	1.8	0.35	-1.45	NA	NA	NA	NA	NA	NA	NA	NA	NA	3.64e-05	1.43e-06	2.81e-05	0.000204	0.202	0.00122	NA	NA	NA	NA	NA	NA	NA	NA	NA	5.47e-05	2.26e-06	4.3e-05	0.000455	0.308	0.00227	FALSE	FALSE	FALSE
O43164	PJA2	0.944	0.114	1.23	1.12	0.758	-0.83	0.282	0.174	-0.186	1.11	1	0.644	-0.108	-0.469	-0.361	0.000613	0.594	6.07e-05	0.000143	0.00319	0.00167	0.201	0.421	0.389	0.00015	0.000368	0.00902	0.614	0.0436	0.109	0.00163	0.604	0.000128	0.00033	0.00553	0.00194	0.252	0.511	0.449	0.000211	0.00046	0.0108	0.659	0.0911	0.141	FALSE	FALSE	TRUE
O43166	SIPA1L1	NA	NA	NA	NA	NA	NA	NA	NA	NA	1.51	NA	NA	NA	NA	NA	NA	NA	NA	NA	NA	NA	NA	NA	NA	1.89e-05	NA	NA	NA	NA	NA	NA	NA	NA	NA	NA	NA	NA	NA	NA	2.96e-05	NA	NA	NA	NA	NA	FALSE	FALSE	FALSE
O43175	PHGDH	-0.369	-4.83	-0.638	-0.209	-0.103	-4.46	-0.269	0.161	0.267	4.2	4.62	4.73	0.429	0.535	0.106	1.14e-06	1.81e-20	2e-09	0.000324	0.0326	4.98e-20	3.16e-05	0.00251	3.4e-05	1.09e-19	3.18e-20	2.38e-20	2.12e-07	1.63e-08	0.0281	6.78e-06	5.21e-19	9.58e-09	0.000696	0.0472	1.74e-18	7.81e-05	0.00593	8.43e-05	4.95e-18	1.43e-18	1.3e-18	8.71e-07	4.21e-07	0.0411	FALSE	TRUE	FALSE
O43237	DYNC1LI2	NA	NA	NA	NA	NA	-4.99	-0.678	NA	-1.15	4.31	NA	3.84	NA	-0.47	NA	NA	NA	NA	NA	NA	8.19e-08	0.0557	NA	0.00494	2.8e-07	NA	7.34e-07	NA	0.162	NA	NA	NA	NA	NA	NA	1.4e-07	0.0789	NA	0.00846	5.48e-07	NA	1.35e-06	NA	0.259	NA	FALSE	FALSE	FALSE
O43242	PSMD3	-0.222	-1.3	0.198	-0.115	0.199	-1.08	0.419	0.107	0.421	1.49	1.18	1.5	-0.312	0.00141	0.314	5.49e-08	1.67e-17	2.06e-07	6.48e-05	1.9e-07	1.8e-16	2.48e-11	0.00012	2.38e-11	2.76e-18	5.4e-17	2.73e-18	9.31e-10	0.944	8.81e-10	5e-07	1.45e-16	6.41e-07	0.000159	7.08e-07	1.47e-15	2.54e-10	0.00038	2.37e-10	6.19e-17	5.47e-16	5.28e-17	7.01e-09	0.962	6.52e-09	FALSE	TRUE	FALSE
O43252	PAPSS1	NA	NA	NA	NA	NA	-3.91	-0.163	0.392	-0.498	3.75	4.3	3.41	0.555	-0.335	-0.89	NA	NA	NA	NA	NA	0.000336	0.806	0.593	0.499	0.000213	0.000178	0.0008	0.413	0.616	0.242	NA	NA	NA	NA	NA	0.000409	0.841	0.676	0.558	0.000295	0.000229	0.00105	0.469	0.711	0.29	FALSE	FALSE	FALSE
O43264	ZW10	-1.23	-3.94	-3.01	-1.57	-2.67	-2.71	-1.78	-0.338	-1.44	0.93	2.37	1.27	1.44	0.339	-1.1	8.68e-08	1.57e-13	3.58e-12	5.97e-09	1.42e-11	3.33e-12	4.18e-10	0.00395	4.56e-09	5.24e-07	1.55e-11	1.82e-08	4.54e-09	0.00391	8.8e-08	7.52e-07	5.23e-13	3.26e-11	3.53e-08	1.29e-10	1.05e-11	3.1e-09	0.00881	2.48e-08	9.87e-07	4.82e-11	4e-08	2.79e-08	0.0123	3.84e-07	TRUE	TRUE	TRUE
O43292	GPAA1	-0.897	-2.47	-2.88	-0.683	-2.51	-1.58	-1.98	0.215	-1.61	-0.407	1.79	-0.0357	2.2	0.371	-1.83	6.86e-06	2.37e-10	6.35e-11	1.21e-05	2.1e-10	1.15e-08	1.6e-09	0.0219	9.48e-09	4.58e-05	1.93e-10	0.53	3.28e-11	9.15e-05	1.63e-10	3.17e-05	4.96e-10	4.27e-10	3.43e-05	1.49e-09	2.16e-08	1.02e-08	0.0403	4.83e-08	6.8e-05	4.98e-10	0.548	4.06e-10	0.000527	1.52e-09	FALSE	TRUE	TRUE
O43293	DAPK3	-1.14	-1.49	-2.6	-1.24	-2.25	-0.348	-1.46	-0.0987	-1.11	-1.11	0.249	-0.759	1.36	0.353	-1.01	0.00553	0.000748	1.22e-05	0.00344	3.8e-05	0.17	0.000167	0.708	0.00113	0.000519	0.313	0.00564	0.000276	0.125	0.00205	0.0114	0.000865	2.86e-05	0.00614	9.05e-05	0.179	0.000364	0.775	0.00215	0.000695	0.326	0.00682	0.000606	0.21	0.00364	FALSE	TRUE	TRUE
O43294	TGFB1I1	-1.19	-3.86	-1.28	-0.187	-1.4	-2.67	-0.0861	1.01	-0.205	2.58	3.67	2.46	1.09	-0.119	-1.21	0.02	3.02e-06	0.0141	0.704	0.00873	3.26e-05	0.83	0.0425	0.61	4.36e-05	4.84e-06	6.56e-05	0.0301	0.767	0.0186	0.0359	4.11e-06	0.0206	0.752	0.014	4.29e-05	0.861	0.0723	0.662	6.49e-05	7.19e-06	9.63e-05	0.0446	0.835	0.0281	FALSE	TRUE	FALSE
O43301	HSPA12A	0.639	-4.07	-3.41	-1.08	-3.56	-4.71	-4.05	-1.72	-4.2	0.659	2.99	0.506	2.33	-0.154	-2.48	0.266	2.62e-05	0.0001	0.0761	7.23e-05	1.23e-06	4.21e-06	0.00374	3.11e-06	0.1	4.64e-05	0.193	0.000292	0.679	0.000185	0.339	3.34e-05	0.000205	0.104	0.000163	1.85e-06	1.23e-05	0.00844	9.38e-06	0.111	6.25e-05	0.208	0.00064	0.764	0.000405	FALSE	TRUE	TRUE
O43310	CTIF	NA	-0.237	1.17	-0.113	0.423	NA	NA	NA	NA	1.41	0.124	0.66	-1.29	-0.751	0.536	NA	0.15	3.21e-05	0.519	0.0336	NA	NA	NA	NA	7.54e-06	0.48	0.00369	3.73e-05	0.00168	0.0178	NA	0.157	7.04e-05	0.577	0.0485	NA	NA	NA	NA	1.23e-05	0.494	0.00454	9.55e-05	0.00613	0.0269	FALSE	FALSE	TRUE
O43312	MTSS1	-0.102	-2.1	-0.59	-0.897	-0.553	-1.99	-0.488	-0.795	-0.451	1.51	1.2	1.54	-0.307	0.0369	0.344	0.361	7.24e-11	0.00011	1.59e-06	0.000198	1.33e-10	0.000573	5.76e-06	0.00107	4.05e-09	6e-08	3.03e-09	0.0135	0.736	0.00701	0.438	1.62e-10	0.000224	5.4e-06	0.000419	3.34e-10	0.00116	2.42e-05	0.00205	9.95e-09	1.1e-07	7.46e-09	0.0213	0.811	0.0114	FALSE	TRUE	FALSE
O43314	PPIP5K2	-0.221	-2.04	-0.176	-0.16	1.15	-1.82	0.0451	0.0617	1.37	1.87	1.88	3.19	0.0166	1.32	1.31	0.178	3.4e-06	0.403	0.356	0.000763	3.47e-06	0.816	0.688	0.00019	2.76e-05	5.77e-06	8.57e-07	0.936	0.000767	0.000357	0.241	4.61e-06	0.453	0.414	0.00147	4.97e-06	0.848	0.759	0.000415	4.21e-05	8.5e-06	1.57e-06	0.947	0.00318	0.000736	FALSE	TRUE	FALSE
O43374	RASA4	-0.666	0.351	-0.896	-0.0427	-0.981	1.02	-0.23	0.623	-0.315	-1.25	-0.393	-1.33	0.854	-0.0843	-0.938	0.000864	0.0407	6.5e-05	0.786	2.72e-05	1.9e-05	0.159	0.00144	0.0623	2.26e-06	0.0243	1.11e-06	0.000103	0.594	4.21e-05	0.00221	0.0434	0.000137	0.823	6.65e-05	2.54e-05	0.204	0.00358	0.0867	3.94e-06	0.0269	1.99e-06	0.000242	0.693	0.000104	FALSE	FALSE	FALSE
O43396	TXNL1	-0.361	-2.87	0.13	0.305	0.268	-2.51	0.49	0.666	0.628	3	3.18	3.14	0.176	0.138	-0.0376	8.31e-06	1.05e-16	0.0236	4.45e-05	0.000152	5.75e-16	2.96e-07	8.41e-09	1.68e-08	6.01e-17	2.92e-17	3.4e-17	0.00415	0.0172	0.469	3.76e-05	7.27e-16	0.0331	0.000112	0.000327	4.1e-15	1.1e-06	7.43e-08	8e-08	7.37e-16	3.2e-16	4.14e-16	0.00724	0.0425	0.523	FALSE	TRUE	FALSE
O43399	TPD52L2	-0.759	-3.91	-0.872	-0.679	-1.33	-3.15	-0.114	0.0796	-0.571	3.04	3.23	2.58	0.193	-0.457	-0.65	0.000531	6.69e-12	0.00016	0.00128	2.41e-06	9.67e-11	0.504	0.638	0.00439	1.52e-10	7.11e-11	1.11e-09	0.264	0.0163	0.00177	0.00144	1.72e-11	0.000318	0.00245	7.08e-06	2.47e-10	0.567	0.716	0.00761	4.57e-10	1.98e-10	2.92e-09	0.315	0.0406	0.00318	FALSE	TRUE	FALSE
O43402	EMC8	NA	NA	NA	NA	NA	-2.76	-3.64	-1.56	-3.56	-0.875	1.2	-0.801	2.07	0.0742	-2	NA	NA	NA	NA	NA	1.21e-06	9.74e-08	0.000153	1.18e-07	0.004	0.000486	0.00672	5.7e-06	0.757	7.83e-06	NA	NA	NA	NA	NA	1.83e-06	4.08e-07	0.000469	4.71e-07	0.00492	0.000602	0.00809	1.71e-05	0.828	2.23e-05	FALSE	FALSE	FALSE
O43414	ERI3	-0.32	-2.22	-0.288	-0.0646	0.0887	-1.9	0.0318	0.255	0.409	1.93	2.16	2.31	0.224	0.377	0.153	3.47e-05	3.58e-15	9.41e-05	0.232	0.109	2.55e-14	0.548	0.000279	2.81e-06	2.07e-14	5.2e-15	2.18e-15	0.00084	6.61e-06	0.0109	0.000134	1.66e-14	0.000193	0.283	0.142	1.19e-13	0.61	0.000814	8.53e-06	1.27e-13	3.08e-14	1.65e-14	0.00168	6.03e-05	0.0171	FALSE	TRUE	FALSE
O43422	THAP12	-0.301	-2.17	0.536	0.194	0.976	-1.87	0.837	0.495	1.28	2.7	2.36	3.14	-0.342	0.44	0.782	0.304	0.000112	0.115	0.611	0.0324	0.000142	0.0184	0.193	0.00793	2.83e-05	0.000278	4.81e-05	0.379	0.267	0.106	0.379	0.000137	0.145	0.666	0.047	0.000177	0.0287	0.265	0.0131	4.3e-05	0.000351	7.15e-05	0.435	0.381	0.138	FALSE	TRUE	FALSE
O43426	SYNJ1	NA	NA	NA	NA	NA	-3.45	0.195	NA	-0.214	3.64	NA	3.24	NA	-0.408	NA	NA	NA	NA	NA	NA	7.7e-05	0.681	NA	0.652	0.000109	NA	0.000226	NA	0.438	NA	NA	NA	NA	NA	NA	9.84e-05	0.732	NA	0.698	0.000156	NA	0.000313	NA	0.554	NA	FALSE	FALSE	FALSE
O43432	EIF4G3	-0.0755	-1.35	-0.462	0.0827	-0.366	-1.28	-0.387	0.158	-0.291	0.889	1.43	0.985	0.545	0.096	-0.449	0.654	1.98e-06	0.0152	0.624	0.0451	3.66e-06	0.0359	0.355	0.102	0.000132	1.03e-06	5.04e-05	0.00583	0.57	0.0177	0.719	2.73e-06	0.022	0.678	0.0633	5.23e-06	0.0528	0.442	0.134	0.000186	1.66e-06	7.48e-05	0.00988	0.672	0.0268	FALSE	TRUE	FALSE
O43491	EPB41L2	-0.352	-0.939	-0.712	-1.07	-0.424	-0.587	-0.36	-0.717	-0.0728	0.227	-0.13	0.514	-0.357	0.287	0.644	4.36e-05	7.24e-10	2e-08	1.48e-10	6.56e-06	1.88e-07	3.47e-05	1.83e-08	0.231	0.00184	0.043	8.32e-07	3.75e-05	0.000279	6.41e-08	0.000163	1.42e-09	7.72e-08	1.45e-09	1.77e-05	3.09e-07	8.5e-05	1.45e-07	0.284	0.00233	0.0469	1.52e-06	9.59e-05	0.00133	2.91e-07	FALSE	FALSE	FALSE
O43516	WIPF1	NA	NA	NA	NA	NA	-3.71	-0.96	-0.548	0.364	2.75	3.16	4.07	0.411	1.32	0.913	NA	NA	NA	NA	NA	1.28e-06	0.00456	0.05	0.238	9.44e-07	3.76e-07	6.93e-07	0.0405	0.000803	0.00586	NA	NA	NA	NA	NA	1.93e-06	0.00798	0.0836	0.291	1.73e-06	6.3e-07	1.28e-06	0.0588	0.00329	0.00965	FALSE	FALSE	FALSE
O43572	AKAP10	NA	NA	NA	NA	NA	-3.37	-1.32	NA	-0.0822	2.05	NA	3.29	NA	1.24	NA	NA	NA	NA	NA	NA	2.13e-06	4.72e-05	NA	0.0665	8.2e-06	NA	2.28e-06	NA	5.62e-05	NA	NA	NA	NA	NA	NA	3.12e-06	0.000113	NA	0.0919	1.33e-05	NA	3.95e-06	NA	0.000358	NA	FALSE	FALSE	FALSE
O43583	DENR	0.47	-2.46	0.364	-0.157	0.172	-2.93	-0.106	-0.627	-0.298	2.82	2.3	2.63	-0.521	-0.192	0.329	0.148	2.46e-06	0.255	0.617	0.583	3.56e-07	0.734	0.0614	0.348	5.38e-07	4.96e-06	1.18e-06	0.113	0.541	0.302	0.206	3.37e-06	0.299	0.671	0.634	5.67e-07	0.779	0.0998	0.406	1.01e-06	7.35e-06	2.11e-06	0.147	0.649	0.353	FALSE	TRUE	FALSE
O43592	XPOT	-0.454	-3.25	0.0316	-0.247	-0.102	-2.79	0.486	0.207	0.352	3.28	3	3.14	-0.279	-0.134	0.145	0.00661	8.37e-10	0.811	0.087	0.407	3.07e-09	0.00454	0.142	0.0152	7.7e-10	1.66e-09	4.21e-10	0.0587	0.284	0.247	0.0134	1.63e-09	0.839	0.117	0.466	6.28e-09	0.00796	0.205	0.0238	2.1e-09	3.76e-09	1.18e-09	0.0818	0.4	0.296	FALSE	TRUE	FALSE
O43617	TRAPPC3	-0.913	-3.07	-0.875	-0.441	-0.321	-2.15	0.0385	0.472	0.592	2.19	2.62	2.74	0.433	0.554	0.12	0.000333	6.68e-10	0.000479	0.0358	0.112	4.57e-08	0.841	0.0264	0.00784	3.71e-08	4.37e-09	2.55e-09	0.0386	0.0116	0.534	0.000961	1.32e-09	0.000886	0.0523	0.146	8e-08	0.87	0.0476	0.0129	8e-08	9.34e-09	6.34e-09	0.0562	0.0306	0.585	FALSE	TRUE	FALSE
O43633	CHMP2A	-0.412	-3	0.116	-0.489	-0.37	-2.59	0.528	-0.0767	0.0425	3.12	2.51	2.63	-0.605	-0.486	0.119	0.182	2.55e-07	0.63	0.0472	0.116	5.95e-06	0.0972	0.781	0.878	1.86e-07	4.43e-07	3.01e-07	0.0195	0.0485	0.546	0.245	3.82e-07	0.673	0.0669	0.15	8.31e-06	0.131	0.834	0.896	3.7e-07	7.38e-07	5.81e-07	0.0301	0.0995	0.598	FALSE	TRUE	FALSE
O43639	NCK2	NA	NA	NA	NA	NA	-2.1	-0.235	NA	NA	1.86	NA	NA	NA	NA	NA	NA	NA	NA	NA	NA	7.76e-06	0.00492	NA	NA	1.07e-05	NA	NA	NA	NA	NA	NA	NA	NA	NA	NA	1.07e-05	0.00857	NA	NA	1.72e-05	NA	NA	NA	NA	NA	FALSE	FALSE	FALSE
O43663	PRC1	0.341	-1.13	-1.96	-0.489	-1.53	-1.47	-2.3	-0.83	-1.88	-0.829	0.641	-0.405	1.47	0.425	-1.05	0.0297	2.24e-06	4.02e-09	0.00396	7.21e-08	1.17e-07	5.77e-10	5.23e-05	6.78e-09	5.26e-05	0.000528	0.0126	1.18e-07	0.00952	5.12e-06	0.0507	3.08e-06	1.8e-08	0.007	2.95e-07	1.98e-07	4.15e-09	0.000178	3.55e-08	7.74e-05	0.00065	0.0148	5.13e-07	0.026	1.51e-05	FALSE	TRUE	TRUE
O43670	ZNF207	-0.167	-3.46	-0.545	-0.297	-0.104	-3.29	-0.378	-0.13	0.0624	2.91	3.16	3.35	0.248	0.44	0.193	0.0164	1e-16	6.97e-07	0.0003	0.108	1.88e-16	3.25e-05	0.0509	0.321	8.78e-16	3.13e-16	1.48e-16	0.00131	6.91e-06	0.00729	0.0302	6.99e-16	1.98e-06	0.00065	0.141	1.52e-15	8.03e-05	0.0848	0.378	7.65e-15	2.6e-15	1.54e-15	0.00252	6.25e-05	0.0118	FALSE	TRUE	FALSE
O43681	ASNA1	-1.23	-4.99	-2.79	-0.765	-2.74	-3.76	-1.56	0.466	-1.51	2.2	4.22	2.25	2.02	0.0466	-1.98	2.12e-08	6.26e-16	9.52e-13	4.47e-06	1.18e-12	2.25e-14	1.27e-09	0.000499	1.84e-09	1.84e-11	5.14e-15	1.42e-11	5.15e-11	0.651	6.87e-11	2.3e-07	3.5e-15	1.04e-11	1.39e-05	1.4e-11	1.06e-13	8.37e-09	0.00139	1.09e-08	6.41e-11	3.05e-14	4.91e-11	6.04e-10	0.74	7.2e-10	TRUE	TRUE	TRUE
O43684	BUB3	-0.334	-3.78	-0.815	-0.497	-0.393	-3.45	-0.482	-0.163	-0.0593	2.97	3.29	3.39	0.319	0.423	0.104	2.11e-06	2.29e-19	5.71e-11	2.3e-08	3.45e-07	7.39e-19	3.29e-08	0.0016	0.171	4.99e-18	1.37e-18	9.21e-19	3.45e-06	1.51e-07	0.0249	1.14e-05	3.9e-18	3.92e-10	1.16e-07	1.23e-06	1.37e-17	1.53e-07	0.00393	0.216	1.01e-16	2.55e-17	2.26e-17	1.08e-05	2.49e-06	0.0367	FALSE	TRUE	FALSE
O43707	ACTN4	-0.305	-1.97	-0.463	-0.011	-0.499	-1.67	-0.158	0.294	-0.194	1.51	1.96	1.47	0.452	-0.0363	-0.488	3.38e-09	2.37e-19	2.04e-11	0.615	8.01e-12	2e-18	5.99e-06	5.25e-09	6.4e-07	7.09e-18	2.55e-19	9.65e-18	2.76e-11	0.114	1.06e-11	5.13e-08	4.02e-18	1.57e-10	0.67	7.77e-11	3.08e-17	1.7e-05	4.85e-08	2.2e-06	1.29e-16	6.58e-18	1.41e-16	3.44e-10	0.195	1.5e-10	FALSE	TRUE	FALSE
O43709	BUD23	-0.06	0.879	0.361	-0.195	-0.0387	0.939	0.421	-0.135	0.0214	-0.518	-1.07	-0.918	-0.556	-0.4	0.156	0.465	7.07e-08	0.000595	0.0297	0.636	3.27e-08	0.000159	0.115	0.793	2.23e-05	6.68e-09	4.29e-08	1.08e-05	0.000252	0.072	0.543	1.12e-07	0.00109	0.044	0.684	5.82e-08	0.000348	0.171	0.82	3.45e-05	1.39e-08	9.06e-08	3.07e-05	0.00123	0.0973	FALSE	FALSE	FALSE
O43747	AP1G1	-0.546	-4.25	-0.738	0.0142	-0.351	-3.7	-0.192	0.56	0.195	3.51	4.26	3.9	0.752	0.387	-0.365	0.0132	1.36e-11	0.00194	0.942	0.0879	7.45e-11	0.331	0.0115	0.323	1.44e-10	1.3e-11	3.95e-11	0.00169	0.0627	0.0771	0.0249	3.35e-11	0.00325	0.952	0.116	1.94e-10	0.393	0.0226	0.381	4.34e-10	4.1e-11	1.28e-10	0.00318	0.122	0.103	FALSE	TRUE	FALSE
O43752	STX6	NA	NA	NA	NA	NA	NA	NA	NA	NA	1.18	NA	1.36	NA	0.183	NA	NA	NA	NA	NA	NA	NA	NA	NA	NA	0.00123	NA	0.00054	NA	0.436	NA	NA	NA	NA	NA	NA	NA	NA	NA	NA	0.00159	NA	0.000723	NA	0.552	NA	FALSE	FALSE	FALSE
O43776	NARS	-0.321	-3.94	0.206	0.153	0.0859	-3.62	0.527	0.474	0.407	4.14	4.09	4.02	-0.0526	-0.12	-0.067	9.92e-05	1.08e-17	0.0036	0.0204	0.161	3.19e-17	6.11e-07	1.94e-06	9.73e-06	5.69e-18	6.69e-18	8.24e-18	0.379	0.0591	0.267	0.000335	9.79e-17	0.00576	0.0312	0.202	3.25e-16	2.16e-06	9.12e-06	2.66e-05	1.11e-16	9.3e-17	1.26e-16	0.435	0.117	0.316	FALSE	TRUE	FALSE
O43790	KRT86	-3.64	NA	-0.241	0.262	-0.222	NA	3.4	3.91	3.42	NA	NA	NA	0.503	0.0189	-0.484	6.04e-09	NA	0.111	0.184	0.137	NA	4.34e-09	2.14e-08	4.16e-09	NA	NA	NA	0.0186	0.879	0.022	8.15e-08	NA	0.14	0.23	0.174	NA	2.45e-08	1.66e-07	2.28e-08	NA	NA	NA	0.0288	0.914	0.0329	TRUE	FALSE	FALSE
O43795	MYO1B	-0.285	-1.51	-1.05	-0.0138	-1.25	-1.22	-0.761	0.271	-0.969	0.463	1.49	0.255	1.03	-0.208	-1.24	0.00216	4.56e-11	4e-09	0.856	4.43e-10	5.95e-10	1.68e-07	0.00306	9.9e-09	3.37e-05	5.11e-11	0.00463	4.69e-09	0.0151	5.07e-10	0.00502	1.05e-10	1.79e-08	0.88	2.91e-09	1.34e-09	6.62e-07	0.00703	5.03e-08	5.08e-05	1.46e-10	0.00565	2.87e-08	0.0382	3.99e-09	FALSE	TRUE	TRUE
O43815	STRN	-0.262	-1.94	-1.04	-0.798	-0.888	-1.68	-0.781	-0.535	-0.626	0.896	1.14	1.05	0.245	0.155	-0.0902	0.00011	7.59e-15	1.81e-11	4.91e-10	1.32e-10	4.75e-14	6.39e-10	5.76e-08	9.22e-09	1.18e-10	5.89e-12	1.64e-11	0.000202	0.00645	0.0815	0.000367	3.29e-14	1.41e-10	4.07e-09	9.74e-10	2.1e-13	4.57e-09	3.95e-07	4.72e-08	3.62e-10	1.94e-11	5.6e-11	0.000452	0.0186	0.109	FALSE	TRUE	TRUE
O43818	RRP9	0.369	1.17	-0.0592	0.198	-0.263	0.806	-0.428	-0.171	-0.632	-1.23	-0.976	-1.44	0.257	-0.204	-0.462	3.75e-10	1.89e-16	0.017	5.65e-07	2.15e-08	2.22e-14	6.02e-11	2.9e-06	4.67e-13	1.01e-16	1.96e-15	1.46e-17	2.82e-08	4.04e-07	2.37e-11	8.29e-09	1.23e-15	0.0244	2.11e-06	9.76e-08	1.05e-13	5.43e-10	1.3e-05	7.34e-12	1.15e-15	1.3e-14	2.03e-16	1.39e-07	5.79e-06	2.9e-10	FALSE	TRUE	FALSE
O43823	AKAP8	-0.128	-0.814	0.6	0.411	0.438	-0.686	0.728	0.539	0.566	1.41	1.22	1.25	-0.189	-0.163	0.0266	0.0228	6.08e-10	2.35e-08	1.74e-06	8.74e-07	4.83e-09	2.34e-09	8.22e-08	4.7e-08	6.49e-13	3.91e-12	2.99e-12	0.00221	0.00609	0.601	0.0401	1.21e-09	8.88e-08	5.84e-06	2.84e-06	9.59e-09	1.43e-08	5.47e-07	2.04e-07	2.95e-12	1.33e-11	1.14e-11	0.00405	0.0177	0.649	FALSE	FALSE	FALSE
O43837	IDH3B	-0.972	-4.39	-2.68	0.11	-3.1	-3.42	-1.7	1.08	-2.13	1.71	4.5	1.28	2.79	-0.428	-3.21	0.00063	4.53e-11	1.82e-08	0.618	3.11e-09	9.78e-10	3.02e-06	0.000254	2.55e-07	2.87e-06	3.33e-11	5.34e-05	1.13e-08	0.0698	2.04e-09	0.00167	1.05e-10	7.1e-08	0.672	1.67e-08	2.14e-09	9.1e-06	0.000747	9.55e-07	4.93e-06	9.87e-11	7.91e-05	6.27e-08	0.133	1.37e-08	FALSE	TRUE	TRUE
O43847	NRDC	0.083	-2.18	0.547	0.286	0.254	-2.27	0.464	0.203	0.171	2.73	2.47	2.44	-0.261	-0.292	-0.0313	0.348	2.54e-12	2.54e-05	0.00534	0.0108	1.59e-12	0.000122	0.0338	0.066	1.54e-13	5.44e-13	6.38e-13	0.00929	0.00461	0.719	0.425	6.86e-12	5.67e-05	0.00917	0.017	5.29e-12	0.000273	0.0594	0.0913	7.74e-13	2.11e-12	2.77e-12	0.0152	0.014	0.756	FALSE	TRUE	FALSE
O43852	CALU	-0.763	-3.26	-1.88	-0.667	-2.37	-2.5	-1.11	0.0962	-1.61	1.39	2.6	0.892	1.21	-0.496	-1.7	4.48e-13	4.62e-21	5.23e-18	2.42e-12	2.66e-19	1.36e-19	3.92e-15	0.00274	3.68e-17	2.38e-16	8.44e-20	6.36e-14	1.37e-15	9.55e-11	1.76e-17	3.84e-11	1.92e-19	3.01e-16	4.26e-11	2.46e-17	3.56e-18	1.22e-13	0.00636	2.05e-15	2.45e-15	2.95e-18	3.33e-13	7.44e-14	9.46e-09	3.34e-15	FALSE	TRUE	TRUE
O43861	ATP9B	NA	NA	NA	NA	NA	-1.74	-2.02	0.307	-1.31	-0.283	2.04	0.427	2.33	0.711	-1.62	NA	NA	NA	NA	NA	0.0475	0.0264	0.706	0.115	0.602	0.00851	0.437	0.00431	0.211	0.0251	NA	NA	NA	NA	NA	0.0511	0.04	0.774	0.151	0.62	0.00967	0.455	0.00751	0.319	0.037	FALSE	FALSE	FALSE
O43865	AHCYL1	-1.33	-3.93	-0.692	-1.79	-0.107	-2.6	0.634	-0.468	1.22	3.23	2.13	3.82	-1.1	0.586	1.69	5.78e-12	6.57e-18	1.61e-08	1.32e-13	0.0763	1.22e-15	4.56e-08	1.42e-06	1.64e-11	7.69e-17	1.49e-14	9.32e-18	5.8e-11	1.13e-07	2.85e-13	2.83e-10	6.34e-17	6.33e-08	3.67e-12	0.102	8.01e-15	2.06e-07	6.84e-06	1.73e-10	9.18e-16	7.95e-14	1.39e-16	6.72e-10	1.96e-06	6.97e-12	TRUE	TRUE	FALSE
O43929	ORC4	-0.237	-1.58	0.404	0.508	-0.0719	-1.34	0.642	0.745	0.165	1.98	2.09	1.51	0.104	-0.476	-0.58	0.582	0.00248	0.354	0.248	0.867	0.00724	0.151	0.1	0.7	0.000425	0.000275	0.00343	0.809	0.278	0.191	0.654	0.00281	0.404	0.301	0.89	0.00814	0.195	0.153	0.741	0.000575	0.000347	0.00423	0.838	0.393	0.235	FALSE	TRUE	FALSE
O43930	PRKY	-0.686	-1.8	-1.3	-0.696	-0.997	-1.12	-0.618	-0.0101	-0.311	0.499	1.11	0.806	0.607	0.306	-0.301	2.54e-07	2.16e-12	1.21e-10	2.15e-07	3.16e-09	7.98e-10	8.2e-07	0.887	0.000651	8.01e-06	8.91e-10	3.96e-08	9.84e-07	0.000749	0.000848	1.89e-06	5.95e-12	7.49e-10	8.7e-07	1.69e-08	1.77e-09	2.82e-06	0.915	0.0013	1.31e-05	2.1e-09	8.41e-08	3.5e-06	0.00313	0.00162	FALSE	TRUE	TRUE
O60216	RAD21	-0.459	-1.74	-0.51	-0.248	-0.587	-1.28	-0.0514	0.211	-0.129	1.23	1.49	1.15	0.262	-0.0772	-0.339	0.00111	9.09e-10	0.000473	0.0417	0.000139	3.51e-08	0.646	0.0768	0.261	5.66e-08	5.79e-09	1.2e-07	0.0327	0.493	0.00863	0.00276	1.77e-09	0.000876	0.0599	0.000299	6.22e-08	0.701	0.121	0.315	1.19e-07	1.22e-08	2.42e-07	0.0483	0.604	0.0138	FALSE	TRUE	FALSE
O60218	AKR1B10	-1.72	-3.73	NA	NA	NA	-2.01	NA	NA	NA	NA	NA	NA	NA	NA	NA	2.31e-05	1.63e-06	NA	NA	NA	8.71e-06	NA	NA	NA	NA	NA	NA	NA	NA	NA	9.39e-05	2.26e-06	NA	NA	NA	1.2e-05	NA	NA	NA	NA	NA	NA	NA	NA	NA	TRUE	TRUE	FALSE
O60231	DHX16	-0.27	-3.04	-0.283	-1.11	-0.0565	-2.77	-0.0129	-0.84	0.214	2.76	1.93	2.99	-0.827	0.226	1.05	0.279	1.29e-08	0.258	0.000481	0.817	3.86e-08	0.958	0.00389	0.388	4.08e-08	2.26e-06	1.61e-08	0.00431	0.361	0.000737	0.353	2.2e-08	0.302	0.000997	0.847	6.82e-08	0.967	0.00871	0.448	8.74e-08	3.47e-06	3.58e-08	0.00751	0.479	0.00143	FALSE	TRUE	FALSE
O60244	MED14	-0.344	-1.2	-0.701	-1.38	-0.365	-0.857	-0.357	-1.04	-0.0208	0.5	-0.179	0.837	-0.68	0.336	1.02	0.000894	1.79e-09	9.42e-07	3.3e-10	0.000558	9.73e-08	0.000666	1.05e-08	0.799	3.23e-05	0.0434	1.29e-07	1.33e-06	0.00107	1.34e-08	0.00228	3.36e-09	2.62e-06	2.91e-09	0.0011	1.65e-07	0.00133	8.98e-08	0.826	4.88e-05	0.0473	2.59e-07	4.59e-06	0.00418	7.16e-08	FALSE	TRUE	FALSE
O60271	SPAG9	-0.812	-3.17	-0.274	-0.614	-0.293	-2.36	0.538	0.198	0.519	2.89	2.55	2.88	-0.34	-0.0193	0.321	7.88e-06	8e-13	0.0309	0.000122	0.0224	3.21e-11	0.000388	0.103	0.000526	2.48e-12	1.18e-11	2.7e-12	0.0102	0.867	0.0141	3.59e-05	2.36e-12	0.0425	0.000286	0.0335	8.72e-11	0.000809	0.156	0.00106	9.87e-12	3.72e-11	1.03e-11	0.0166	0.906	0.0218	FALSE	TRUE	FALSE
O60287	URB1	0.13	1.53	-0.192	0.112	-0.313	1.4	-0.321	-0.0176	-0.442	-1.72	-1.41	-1.84	0.304	-0.121	-0.424	0.337	3.42e-08	0.164	0.405	0.0322	9.6e-08	0.0283	0.894	0.00487	8.44e-09	8.31e-08	3.75e-09	0.0365	0.371	0.0063	0.414	5.57e-08	0.201	0.464	0.0467	1.63e-07	0.0425	0.92	0.00836	1.99e-08	1.5e-07	9.1e-09	0.0533	0.489	0.0103	FALSE	TRUE	FALSE
O60293	ZFC3H1	-0.285	1.07	0.0679	-0.294	0.0641	1.35	0.353	-0.0083	0.349	-1	-1.36	-1	-0.362	-0.00384	0.358	0.00269	4.58e-09	0.393	0.00219	0.419	2.6e-10	0.000527	0.916	0.000576	1e-08	2.41e-10	9.59e-09	0.000434	0.961	0.000475	0.00608	8.18e-09	0.443	0.00406	0.478	6.18e-10	0.00107	0.938	0.00116	2.35e-08	6.1e-10	2.2e-08	0.000922	0.971	0.000956	FALSE	TRUE	FALSE
O60315	ZEB2	-0.421	-1.33	-0.095	-0.365	-0.394	-0.908	0.325	0.0552	0.027	1.23	0.963	0.935	-0.27	-0.298	-0.0282	8.26e-05	2.1e-10	0.222	0.000293	0.000152	2.06e-08	0.000765	0.47	0.721	5.19e-10	1.02e-08	1.46e-08	0.00305	0.0015	0.71	0.000284	4.42e-10	0.264	0.000637	0.000327	3.73e-08	0.00151	0.562	0.759	1.45e-09	2.07e-08	3.25e-08	0.00548	0.00555	0.747	FALSE	TRUE	FALSE
O60331	PIP5K1C	0.167	1.47	0.309	-0.0981	0.251	1.3	0.142	-0.265	0.0846	-1.16	-1.56	-1.22	-0.407	-0.057	0.35	0.091	7.99e-10	0.00506	0.302	0.0166	3.44e-09	0.145	0.0126	0.371	1.36e-08	3.63e-10	7.7e-09	0.000683	0.543	0.00216	0.136	1.56e-09	0.00789	0.358	0.0255	6.98e-09	0.188	0.0246	0.43	3.1e-08	9.04e-10	1.79e-08	0.0014	0.651	0.00383	FALSE	TRUE	FALSE
O60337	2023-03-06	NA	NA	NA	NA	NA	NA	NA	NA	NA	-1.21	2.12	-0.493	3.33	0.718	-2.61	NA	NA	NA	NA	NA	NA	NA	NA	NA	0.00215	0.000656	0.0921	4.24e-05	0.0255	0.00019	NA	NA	NA	NA	NA	NA	NA	NA	NA	0.00271	0.000804	0.102	0.000107	0.059	0.000416	FALSE	FALSE	FALSE
O60341	KDM1A	-0.311	-1.66	0.0292	-0.0614	0.119	-1.35	0.34	0.25	0.43	1.69	1.6	1.78	-0.0905	0.0895	0.18	2.53e-07	2.86e-16	0.372	0.074	0.00244	3.94e-15	9.08e-08	2.87e-06	5.81e-09	2.3e-16	4.61e-16	1.19e-16	0.0133	0.0142	7.77e-05	1.89e-06	1.76e-15	0.422	0.101	0.00431	2.29e-14	3.83e-07	1.29e-05	3.09e-08	2.37e-15	3.67e-15	1.27e-15	0.0211	0.036	0.000182	FALSE	TRUE	FALSE
O60427	FADS1	NA	NA	NA	NA	NA	NA	NA	NA	NA	-0.618	1.96	-0.45	2.58	0.168	-2.41	NA	NA	NA	NA	NA	NA	NA	NA	NA	0.0187	9.38e-06	0.0663	1.01e-06	0.454	1.76e-06	NA	NA	NA	NA	NA	NA	NA	NA	NA	0.0219	1.35e-05	0.0742	3.58e-06	0.567	5.83e-06	FALSE	FALSE	FALSE
O60462	NRP2	0.261	-1.08	-0.666	0.116	-0.486	-1.34	-0.927	-0.145	-0.747	0.41	1.19	0.589	0.782	0.18	-0.602	0.35	0.00111	0.0199	0.645	0.0721	0.00021	0.00306	0.564	0.0111	0.0878	0.000216	0.021	0.00445	0.427	0.0189	0.427	0.00127	0.0282	0.698	0.097	0.00026	0.00555	0.649	0.0178	0.097	0.000274	0.0243	0.00772	0.543	0.0285	FALSE	TRUE	FALSE
O60488	ACSL4	-0.299	-2.7	-3.02	-1.32	-2.81	-2.4	-2.72	-1.02	-2.51	-0.327	1.38	-0.109	1.7	0.218	-1.49	2.61e-05	9.12e-17	2.14e-17	7.5e-13	5.53e-17	4.04e-16	8.02e-17	1.85e-11	2.31e-16	1.07e-05	4.41e-13	0.0371	3.03e-14	0.000473	1.7e-13	0.000104	6.49e-16	9.55e-16	1.59e-11	2.2e-15	2.95e-15	3.96e-15	3.83e-10	9.75e-15	1.72e-05	1.74e-12	0.0423	1.12e-12	0.0021	4.41e-12	FALSE	TRUE	TRUE
O60493	SNX3	-0.374	-4.1	-0.331	-0.281	0.143	-3.73	0.0421	0.0923	0.517	3.77	3.82	4.24	0.0502	0.475	0.425	4.68e-08	4.77e-21	1.86e-07	1.17e-06	0.000772	1.61e-20	0.221	0.0146	9.7e-10	1.39e-20	1.18e-20	3.08e-21	0.149	2.71e-09	1.03e-08	4.4e-07	1.92e-19	5.84e-07	4.1e-06	0.00149	8.6e-19	0.273	0.028	6.14e-09	1.14e-18	7.58e-19	2.76e-19	0.19	1.03e-07	5.7e-08	FALSE	TRUE	FALSE
O60547	GMDS	-0.497	-2.45	-0.194	-0.361	-0.142	-1.96	0.302	0.136	0.355	2.26	2.09	2.31	-0.166	0.0523	0.219	0.0274	1.95e-08	0.348	0.0941	0.489	2.67e-07	0.154	0.508	0.0991	5.12e-08	1.24e-07	3.92e-08	0.419	0.797	0.293	0.0471	3.25e-08	0.398	0.125	0.547	4.3e-07	0.198	0.598	0.131	1.08e-07	2.19e-07	8.32e-08	0.475	0.855	0.343	FALSE	TRUE	FALSE
O60551	NMT2	-0.134	-3.08	-1.01	-1.2	-0.605	-2.94	-0.88	-1.07	-0.471	2.06	1.88	2.47	-0.185	0.409	0.595	0.588	1.27e-08	0.00108	0.000271	0.0265	2.14e-08	0.00304	0.000729	0.0732	1.23e-06	3.41e-06	1.62e-07	0.456	0.114	0.0287	0.661	2.16e-08	0.00189	0.000594	0.0391	3.88e-08	0.0055	0.00194	0.1	2.22e-06	5.13e-06	3.23e-07	0.511	0.195	0.0419	FALSE	TRUE	TRUE
O60565	GREM1	-0.252	1.05	0.0111	-0.211	0.607	1.31	0.263	0.0411	0.859	-1.04	-1.26	-0.446	-0.222	0.596	0.818	0.157	3.13e-05	0.948	0.231	0.00321	3.46e-06	0.141	0.81	0.000209	3.47e-05	4.86e-06	0.0199	0.209	0.00364	0.000321	0.216	3.96e-05	0.957	0.282	0.00556	4.96e-06	0.183	0.856	0.000454	5.22e-05	7.22e-06	0.0232	0.257	0.0115	0.000666	FALSE	TRUE	FALSE
O60568	PLOD3	-0.639	-2.21	-1.45	-0.635	-1.34	-1.57	-0.815	0.0041	-0.696	0.754	1.57	0.873	0.819	0.119	-0.701	1.47e-06	5.03e-13	9.12e-11	1.57e-06	2.6e-10	3.55e-11	9.42e-08	0.958	5.64e-07	2.3e-07	3.44e-11	4.25e-08	8.89e-08	0.141	5.28e-07	8.52e-06	1.53e-12	5.81e-10	5.36e-06	1.82e-09	9.59e-11	3.96e-07	0.971	1.96e-06	4.54e-07	1.02e-10	9.01e-08	3.97e-07	0.231	1.96e-06	FALSE	TRUE	TRUE
O60573	EIF4E2	-0.0204	-1.01	-0.675	-0.718	-0.957	-0.987	-0.655	-0.698	-0.936	0.332	0.289	0.0505	-0.0435	-0.282	-0.238	0.897	2.1e-05	0.000782	0.00047	3.49e-05	2.58e-05	0.000996	0.000596	4.31e-05	0.0508	0.084	0.749	0.782	0.0909	0.146	0.921	2.7e-05	0.0014	0.000977	8.34e-05	3.42e-05	0.00193	0.00162	0.000105	0.0574	0.0904	0.762	0.815	0.164	0.185	FALSE	TRUE	FALSE
O60610	DIAPH1	-0.599	-3.39	-0.512	-0.0799	-0.202	-2.79	0.0872	0.519	0.397	2.88	3.31	3.19	0.432	0.31	-0.122	0.0976	7.05e-07	0.15	0.813	0.674	4.58e-06	0.797	0.145	0.414	3.42e-06	8.9e-07	3.24e-05	0.218	0.521	0.799	0.144	1.01e-06	0.185	0.848	0.718	6.47e-06	0.833	0.209	0.474	5.82e-06	1.44e-06	4.9e-05	0.266	0.63	0.827	FALSE	TRUE	FALSE
O60613	SELENOF	0.147	-1.84	-1.13	-0.0859	-1.14	-1.99	-1.28	-0.233	-1.29	0.709	1.76	0.702	1.05	-0.00744	-1.06	0.407	9.26e-08	1.83e-05	0.624	1.71e-05	3.81e-08	5.23e-06	0.198	4.92e-06	0.0012	1.6e-07	0.0013	3.98e-05	0.966	3.71e-05	0.485	1.45e-07	4.19e-05	0.678	4.31e-05	6.73e-08	1.5e-05	0.271	1.42e-05	0.00156	2.8e-07	0.00167	0.000101	0.975	9.29e-05	FALSE	TRUE	TRUE
O60637	TSPAN3	NA	NA	NA	NA	NA	-5.02	-3.76	-1.32	-3.48	1.25	3.7	1.54	2.44	0.287	-2.16	NA	NA	NA	NA	NA	4.49e-08	5.06e-07	0.00143	9.77e-07	0.000192	3.17e-08	4.12e-05	1.03e-06	0.193	2.87e-06	NA	NA	NA	NA	NA	7.88e-08	1.81e-06	0.00357	3.23e-06	0.000267	6.04e-08	6.18e-05	3.64e-06	0.298	9.07e-06	FALSE	FALSE	FALSE
O60645	EXOC3	-0.103	-1.71	0.17	-0.152	0.0482	-1.6	0.273	-0.0492	0.151	1.88	1.55	1.75	-0.322	-0.122	0.2	0.283	1.31e-10	0.0864	0.122	0.607	2.8e-10	0.0109	0.6	0.124	4.05e-11	4.1e-10	9.29e-11	0.00391	0.206	0.0483	0.357	2.83e-10	0.111	0.158	0.657	6.62e-10	0.0178	0.682	0.161	1.33e-10	1.01e-09	2.83e-10	0.00689	0.312	0.0674	FALSE	TRUE	FALSE
O60684	KPNA6	0.241	-0.986	0.174	0.244	-0.254	-1.23	-0.0677	0.00228	-0.495	1.16	1.23	0.732	0.0699	-0.428	-0.498	0.252	0.000306	0.404	0.248	0.229	4.12e-05	0.742	0.991	0.0287	7.08e-05	4.04e-05	0.00309	0.734	0.0534	0.0281	0.323	0.000362	0.454	0.3	0.277	5.37e-05	0.786	0.993	0.0428	0.000103	5.46e-05	0.00382	0.771	0.108	0.0411	FALSE	FALSE	FALSE
O60701	UGDH	-0.267	-4.72	-0.244	-0.203	0.328	-4.45	0.0237	0.0648	0.596	4.48	4.52	5.05	0.0411	0.572	0.531	0.00696	1.12e-16	0.012	0.0304	0.00175	2.35e-16	0.781	0.45	8.37e-06	2.2e-16	1.96e-16	4.8e-17	0.63	1.27e-05	2.69e-05	0.014	7.69e-16	0.0177	0.045	0.00318	1.86e-15	0.819	0.542	2.31e-05	2.29e-15	1.75e-15	5.68e-16	0.673	0.000106	6.91e-05	FALSE	TRUE	FALSE
O60704	TPST2	NA	NA	NA	NA	NA	-5.22	-3.81	-1.85	-3.6	1.41	3.37	1.62	1.96	0.207	-1.75	NA	NA	NA	NA	NA	7.56e-10	8.49e-09	3.03e-06	1.3e-08	1.1e-06	3.57e-09	3.97e-07	2.23e-07	0.0814	5.17e-07	NA	NA	NA	NA	NA	1.68e-09	4.49e-08	1.35e-05	6.41e-08	2e-06	7.72e-09	7.57e-07	9.13e-07	0.15	1.92e-06	FALSE	FALSE	FALSE
O60716	CTNND1	-0.0988	-3.24	-1.4	-0.351	-1.31	-3.14	-1.3	-0.253	-1.21	1.84	2.89	1.93	1.05	0.0944	-0.956	0.061	1.28e-17	5.03e-13	6.75e-06	1.2e-12	1.89e-17	1.26e-12	0.000168	3.22e-12	1.66e-14	5.47e-17	8.84e-15	1.84e-11	0.0719	5.92e-11	0.0952	1.14e-16	5.89e-12	2.02e-05	1.43e-11	2.1e-16	1.77e-11	0.000512	4.02e-11	1.06e-13	5.53e-16	5.55e-14	2.46e-10	0.136	6.34e-10	FALSE	TRUE	TRUE
O60749	SNX2	-0.194	-3.83	-0.714	-0.408	-0.136	-3.63	-0.52	-0.214	0.0574	3.11	3.42	3.69	0.306	0.577	0.272	0.305	2.83e-11	0.00179	0.043	0.466	5.39e-11	0.0135	0.259	0.757	3.59e-10	1.14e-10	4.44e-11	0.117	0.00741	0.159	0.381	6.72e-11	0.00302	0.0616	0.525	1.43e-10	0.0218	0.342	0.791	1.02e-09	3.05e-10	1.42e-10	0.152	0.0209	0.199	FALSE	TRUE	FALSE
O60762	DPM1	-0.315	-0.886	-2.31	-0.116	-2.06	-0.57	-1.99	0.2	-1.74	-1.42	0.77	-1.17	2.19	0.251	-1.94	0.0371	2.1e-05	3.9e-10	0.409	1.58e-09	0.00107	2.32e-09	0.165	1.16e-08	1.24e-07	8.16e-05	1.09e-06	7.3e-10	0.0876	3.17e-09	0.0618	2.7e-05	2.15e-09	0.469	9.01e-09	0.00126	1.42e-08	0.232	5.79e-08	2.51e-07	0.000108	1.97e-06	5.73e-09	0.159	2e-08	FALSE	FALSE	TRUE
O60763	USO1	-0.365	-2.08	0.2	0.231	-0.151	-1.71	0.564	0.596	0.214	2.28	2.31	1.93	0.0314	-0.35	-0.382	5.7e-08	2.45e-17	3.86e-05	8.91e-06	0.000482	2.83e-16	3.07e-10	1.58e-10	1.95e-05	7.66e-18	6.44e-18	6.38e-17	0.351	9.07e-08	3.34e-08	5.17e-07	2.02e-16	8.41e-05	2.6e-05	0.00096	2.17e-15	2.34e-09	2.33e-09	5.04e-05	1.38e-16	9.06e-17	7.33e-16	0.407	1.65e-06	1.61e-07	FALSE	TRUE	FALSE
O60825	PFKFB2	NA	NA	NA	NA	NA	NA	NA	NA	NA	2.41	NA	NA	NA	NA	NA	NA	NA	NA	NA	NA	NA	NA	NA	NA	5.3e-06	NA	NA	NA	NA	NA	NA	NA	NA	NA	NA	NA	NA	NA	NA	8.81e-06	NA	NA	NA	NA	NA	FALSE	FALSE	FALSE
O60826	CCDC22	-0.647	-3	-0.96	-0.703	-0.511	-2.35	-0.314	-0.0562	0.135	2.04	2.3	2.49	0.257	0.449	0.192	0.122	3.97e-06	0.0289	0.0953	0.213	4.67e-05	0.436	0.888	0.734	0.000177	5.89e-05	2.71e-05	0.521	0.271	0.632	0.173	5.34e-06	0.0402	0.126	0.26	6.06e-05	0.499	0.915	0.77	0.000246	7.87e-05	4.14e-05	0.574	0.386	0.677	FALSE	TRUE	FALSE
O60828	PQBP1	-0.657	-2.58	-0.313	-2.18	-0.205	-1.93	0.344	-1.52	0.452	2.27	0.408	2.38	-1.86	0.108	1.97	8.35e-08	4.04e-15	0.000189	3.52e-14	0.00488	1.63e-13	8.08e-05	3.21e-12	5.33e-06	2.07e-14	1.54e-05	1.15e-14	2.49e-13	0.0983	1.23e-13	7.27e-07	1.85e-14	0.000371	1.18e-12	0.00817	6.44e-13	0.000186	8.88e-11	1.53e-05	1.27e-13	2.19e-05	7.07e-14	6.78e-12	0.174	3.35e-12	FALSE	TRUE	FALSE
O60831	PRAF2	NA	-2.27	-2.81	-1.16	-2.32	NA	NA	NA	NA	-0.541	1.12	-0.0459	1.66	0.495	-1.16	NA	4.73e-07	5.57e-08	0.000223	3.88e-07	NA	NA	NA	NA	0.0277	0.000296	0.833	9.72e-06	0.0404	0.000214	NA	6.89e-07	1.97e-07	0.000497	1.36e-06	NA	NA	NA	NA	0.0318	0.000372	0.843	2.78e-05	0.0855	0.000463	FALSE	TRUE	TRUE
O60832	DKC1	0.00966	1.41	-0.602	0.00379	-0.564	1.4	-0.612	-0.00586	-0.574	-2.02	-1.41	-1.98	0.606	0.0378	-0.568	0.777	4.51e-15	1.95e-10	0.911	4.3e-10	4.92e-15	1.6e-10	0.863	3.5e-10	5.07e-17	4.67e-15	6.44e-17	1.8e-10	0.278	3.97e-10	0.824	2.05e-14	1.14e-09	0.928	2.84e-09	2.76e-14	1.31e-09	0.898	2.5e-09	6.36e-16	2.79e-14	7.38e-16	1.74e-09	0.393	3.25e-09	FALSE	TRUE	FALSE
O60841	EIF5B	-0.532	-2.59	-0.729	-1.31	-0.882	-2.05	-0.197	-0.778	-0.35	1.86	1.28	1.7	-0.581	-0.153	0.428	1.22e-06	5.59e-15	3.4e-08	2.83e-11	3.55e-09	1.02e-13	0.00751	1.6e-08	8.81e-05	3.62e-13	3.87e-11	1.06e-12	4.66e-07	0.0289	1.24e-05	7.19e-06	2.48e-14	1.24e-07	3.65e-10	1.89e-08	4.26e-13	0.0126	1.29e-07	0.000204	1.7e-12	1.13e-10	4.39e-12	1.75e-06	0.0653	3.43e-05	FALSE	TRUE	FALSE
O60869	EDF1	-0.635	-2.79	-1.3	-0.557	-0.829	-2.15	-0.66	0.0779	-0.194	1.49	2.23	1.96	0.738	0.466	-0.272	6e-10	5.32e-18	8.52e-14	2.93e-09	2.25e-11	1.42e-16	3.72e-10	0.0651	0.000244	1.47e-14	9.02e-17	4.7e-16	9.45e-11	2.45e-08	9.7e-06	1.19e-08	5.32e-17	1.26e-12	1.91e-08	1.94e-10	1.21e-15	2.79e-09	0.105	0.000522	9.48e-14	8.63e-16	4.14e-15	1.03e-09	5.8e-07	2.71e-05	FALSE	TRUE	TRUE
O60884	DNAJA2	-0.134	-1.26	0.121	0.582	-0.0739	-1.13	0.255	0.715	0.0597	1.38	1.84	1.19	0.46	-0.195	-0.656	0.000277	1.3e-15	0.000625	2.11e-11	0.017	5.36e-15	4.05e-07	1.6e-12	0.0454	4.06e-16	1.06e-17	2.79e-15	3.76e-10	7.34e-06	4.77e-12	0.000815	6.8e-15	0.00114	2.81e-10	0.026	2.97e-14	1.48e-06	4.89e-11	0.0649	3.9e-15	1.33e-16	2.03e-14	3.25e-09	6.56e-05	7.61e-11	FALSE	TRUE	FALSE
O60885	BRD4	-0.29	-1.37	-0.019	-1.42	0.0388	-1.08	0.271	-1.13	0.329	1.35	-0.0517	1.41	-1.4	0.0578	1.46	2.24e-09	8.2e-18	0.352	5.12e-18	0.0706	1.67e-16	5.05e-09	9.23e-17	4.89e-10	9.78e-18	0.021	5.75e-18	6.07e-18	0.0117	3.64e-18	3.68e-08	7.65e-17	0.402	1.46e-15	0.0953	1.38e-15	2.8e-08	2.41e-14	3.36e-09	1.65e-16	0.0233	9.51e-17	1.36e-15	0.0309	8.63e-16	FALSE	TRUE	FALSE
O60890	OPHN1	NA	NA	NA	NA	NA	NA	NA	NA	NA	NA	NA	NA	1.31	0.13	-1.18	NA	NA	NA	NA	NA	NA	NA	NA	NA	NA	NA	NA	0.00174	0.642	0.00487	NA	NA	NA	NA	NA	NA	NA	NA	NA	NA	NA	NA	0.00326	0.732	0.00812	FALSE	FALSE	FALSE
O60906	SMPD2	NA	NA	NA	NA	NA	-1.06	0.147	0.751	-0.252	1.21	1.81	0.81	0.604	-0.399	-1	NA	NA	NA	NA	NA	0.00386	0.603	0.0228	0.38	0.000166	7.39e-06	0.00246	0.0124	0.0694	0.000618	NA	NA	NA	NA	NA	0.00441	0.662	0.0419	0.44	0.000233	1.08e-05	0.00307	0.0198	0.132	0.00122	FALSE	FALSE	FALSE
O60907	TBL1X	-0.406	-1.07	-0.0379	-0.197	0.157	-0.662	0.368	0.208	0.562	1.03	0.871	1.22	-0.16	0.194	0.354	7.09e-06	9.4e-11	0.509	0.00375	0.0152	3e-08	1.93e-05	0.0026	2e-07	1.47e-10	1.14e-09	1.73e-11	0.0137	0.00416	2.84e-05	3.26e-05	2.06e-10	0.558	0.00666	0.0233	5.36e-08	5.01e-05	0.00608	7.64e-07	4.43e-10	2.65e-09	5.89e-11	0.0216	0.0129	7.26e-05	FALSE	TRUE	FALSE
O60921	HUS1	NA	NA	NA	NA	NA	NA	NA	NA	NA	NA	NA	2.79	NA	NA	NA	NA	NA	NA	NA	NA	NA	NA	NA	NA	NA	NA	3.59e-06	NA	NA	NA	NA	NA	NA	NA	NA	NA	NA	NA	NA	NA	NA	6.08e-06	NA	NA	NA	FALSE	FALSE	FALSE
O60934	NBN	-0.0138	-2.4	0.0957	0.414	-0.0425	-2.38	0.109	0.427	-0.0287	2.49	2.81	2.35	0.318	-0.138	-0.456	0.957	3.32e-07	0.707	0.121	0.867	3.55e-07	0.667	0.11	0.91	2.13e-07	5.35e-08	4.06e-07	0.224	0.588	0.0904	0.966	4.91e-07	0.745	0.157	0.89	5.65e-07	0.721	0.165	0.923	4.22e-07	9.91e-08	7.73e-07	0.273	0.688	0.119	FALSE	TRUE	FALSE
O60942	RNGTT	0.0106	-1.66	-0.205	0.387	0.32	-1.67	-0.216	0.376	0.309	1.45	2.05	1.98	0.592	0.525	-0.0674	0.974	0.00145	0.585	0.257	0.34	0.000423	0.51	0.187	0.266	0.00276	0.000144	0.000172	0.105	0.141	0.798	0.98	0.00166	0.63	0.31	0.398	0.000512	0.574	0.258	0.32	0.00345	0.000186	0.000241	0.138	0.231	0.827	FALSE	TRUE	FALSE
O75027	ABCB7	NA	NA	NA	NA	NA	NA	NA	NA	NA	1.2	NA	1.14	NA	-0.0574	NA	NA	NA	NA	NA	NA	NA	NA	NA	NA	0.000391	NA	0.000897	NA	0.763	NA	NA	NA	NA	NA	NA	NA	NA	NA	NA	0.000532	NA	0.00117	NA	0.832	NA	FALSE	FALSE	FALSE
O75044	SRGAP2	-0.901	-3.87	-3.37	-1.2	-3.52	-2.97	-2.47	-0.294	-2.62	0.503	2.68	0.356	2.18	-0.147	-2.32	0.00493	2.56e-09	1.35e-08	0.000627	8.11e-09	5.89e-08	4.9e-07	0.288	2.55e-07	0.0808	1.95e-07	0.203	1.98e-06	0.588	9.67e-07	0.0104	4.69e-09	5.39e-08	0.00127	3.97e-08	1.02e-07	1.75e-06	0.373	9.55e-07	0.0896	3.4e-07	0.218	6.57e-06	0.688	3.35e-06	FALSE	TRUE	TRUE
O75063	FAM20B	NA	NA	NA	NA	NA	-3.92	-3.26	-1.63	-2.95	0.66	2.29	0.968	1.63	0.307	-1.32	NA	NA	NA	NA	NA	9.81e-07	5.73e-06	0.00176	1.43e-05	0.123	0.000133	0.0328	0.00178	0.453	0.00674	NA	NA	NA	NA	NA	1.49e-06	1.63e-05	0.0043	3.79e-05	0.135	0.000172	0.0375	0.00333	0.567	0.011	FALSE	FALSE	FALSE
O75083	WDR1	-0.274	-4.42	-0.507	-0.396	0.0402	-4.15	-0.233	-0.122	0.314	3.92	4.03	4.46	0.111	0.548	0.437	4.07e-06	5.63e-21	3.58e-09	6.63e-08	0.281	1.27e-20	2.12e-05	0.00465	9.24e-07	2.65e-20	1.86e-20	5.02e-21	0.00853	1.43e-09	2.14e-08	2.03e-05	2.07e-19	1.62e-08	3e-07	0.335	7.3e-19	5.43e-05	0.0102	3.07e-06	1.74e-18	1e-18	3.82e-19	0.014	6.78e-08	1.07e-07	FALSE	TRUE	FALSE
O75096	LRP4	-0.405	-1.35	-0.541	-0.266	-0.753	-0.947	-0.136	0.139	-0.348	0.811	1.09	0.599	0.275	-0.212	-0.486	0.0793	0.000165	0.0141	0.213	0.00429	0.00106	0.416	0.494	0.0815	0.000394	0.000525	0.00315	0.129	0.138	0.0269	0.12	0.000198	0.0206	0.263	0.00727	0.00125	0.479	0.585	0.11	0.000535	0.000647	0.0039	0.167	0.226	0.0395	FALSE	TRUE	FALSE
O75116	ROCK2	-0.667	-4.75	-0.948	-0.639	-0.867	-4.08	-0.281	0.0279	-0.201	3.8	4.11	3.88	0.309	0.0804	-0.229	0.000397	7.56e-14	1.49e-05	0.000566	3.6e-05	5.06e-13	0.0666	0.845	0.176	1.24e-12	4.65e-13	9.52e-13	0.0465	0.576	0.127	0.00112	2.66e-13	3.45e-05	0.00116	8.59e-05	1.84e-12	0.0926	0.884	0.221	5.29e-12	1.82e-12	3.99e-12	0.0666	0.677	0.162	FALSE	TRUE	FALSE
O75131	CPNE3	0.341	1.45	0.353	0.0154	0.242	1.11	0.0128	-0.325	-0.099	-1.1	-1.44	-1.21	-0.338	-0.112	0.226	0.000116	8.12e-12	8.26e-05	0.809	0.00196	2.21e-10	0.841	0.000176	0.137	2.54e-10	9.27e-12	7.74e-11	0.000125	0.0966	0.00313	0.000384	2.07e-11	0.000171	0.844	0.00353	5.32e-10	0.87	0.000535	0.175	7.4e-10	2.96e-11	2.39e-10	0.000291	0.172	0.00537	FALSE	TRUE	FALSE
O75146	HIP1R	-0.0928	-3.31	-0.458	0.259	-0.264	-3.21	-0.365	0.352	-0.171	2.85	3.56	3.04	0.718	0.194	-0.523	0.362	4.85e-13	0.000565	0.0215	0.0333	6.75e-13	0.00296	0.00378	0.145	2.73e-12	2.02e-13	4.62e-12	1.04e-05	0.101	0.000477	0.439	1.48e-12	0.00103	0.0327	0.0481	2.4e-12	0.00538	0.00849	0.185	1.08e-11	8.53e-13	1.71e-11	2.94e-05	0.178	0.00096	FALSE	TRUE	FALSE
O75150	RNF40	-0.0346	-2.96	-0.0265	0.152	0.648	-2.92	0.0081	0.187	0.683	2.93	3.11	3.6	0.179	0.675	0.496	0.906	3.18e-07	0.928	0.605	0.0436	1.09e-07	0.975	0.48	0.021	1.06e-07	5.56e-08	1.09e-08	0.499	0.0223	0.0776	0.929	4.72e-07	0.94	0.66	0.0616	1.84e-07	0.98	0.573	0.032	2.17e-07	1.03e-07	2.48e-08	0.553	0.0528	0.104	FALSE	TRUE	FALSE
O75151	PHF2	-0.172	0.561	-0.761	-0.474	-0.657	0.733	-0.589	-0.302	-0.485	-1.32	-1.03	-1.22	0.287	0.104	-0.183	0.00406	4.86e-08	1.28e-09	3.34e-07	7.49e-09	2.02e-09	2.73e-08	3.93e-05	2.58e-07	1.4e-12	2.95e-11	3.91e-12	6.4e-05	0.0547	0.00268	0.00874	7.8e-08	6.39e-09	1.3e-06	3.73e-08	4.21e-09	1.3e-07	0.000138	9.66e-07	5.88e-12	8.82e-11	1.46e-11	0.000157	0.11	0.00467	FALSE	FALSE	FALSE
O75152	ZC3H11A	-0.4	-2.51	-1.18	-0.415	-0.958	-2.11	-0.777	-0.0149	-0.558	1.33	2.1	1.55	0.762	0.219	-0.543	0.101	1.35e-07	0.000227	0.0904	0.00117	2.63e-07	0.00236	0.942	0.0172	2.73e-05	2.84e-07	6.25e-06	0.0027	0.298	0.0197	0.148	2.09e-07	0.00044	0.121	0.00219	4.24e-07	0.00436	0.958	0.0266	4.16e-05	4.81e-07	1.03e-05	0.00489	0.415	0.0296	FALSE	TRUE	TRUE
O75153	CLUH	-0.0757	-3.56	0.244	0.209	0.398	-3.48	0.319	0.285	0.473	3.8	3.77	3.95	-0.0343	0.154	0.188	0.649	1.77e-11	0.158	0.22	0.0296	2.32e-11	0.0715	0.103	0.0123	7.79e-12	8.72e-12	4.75e-12	0.836	0.36	0.267	0.715	4.32e-11	0.194	0.271	0.0433	6.47e-11	0.0988	0.157	0.0196	2.86e-11	2.8e-11	1.75e-11	0.863	0.479	0.317	FALSE	TRUE	FALSE
O75164	KDM4A	NA	NA	NA	NA	NA	-2.36	NA	-0.617	0.0602	NA	1.75	2.42	NA	NA	0.677	NA	NA	NA	NA	NA	0.00075	NA	0.218	0.898	NA	0.00679	0.00122	NA	NA	0.217	NA	NA	NA	NA	NA	0.000894	NA	0.295	0.913	NA	0.00775	0.00157	NA	NA	0.263	FALSE	FALSE	FALSE
O75165	DNAJC13	0.182	-0.747	-1.16	-0.522	-0.779	-0.929	-1.34	-0.703	-0.961	-0.409	0.226	-0.0317	0.635	0.378	-0.258	0.000507	1.04e-10	4.55e-13	8.2e-09	6.25e-11	7.01e-12	7.26e-14	2.19e-10	4.62e-12	1.4e-07	7.48e-05	0.436	7.65e-10	3.5e-07	2.09e-05	0.00139	2.27e-10	5.37e-12	4.69e-08	4.94e-10	2.09e-11	1.46e-12	3.05e-09	5.62e-11	2.83e-07	9.89e-05	0.454	5.96e-09	5.11e-06	5.52e-05	FALSE	FALSE	TRUE
O75175	CNOT3	-0.361	-2.34	-1.15	-0.336	-0.994	-1.98	-0.785	0.0247	-0.633	1.19	2	1.35	0.81	0.153	-0.658	0.00318	7.35e-12	4.26e-08	0.00509	2.22e-07	5.86e-11	2.98e-06	0.808	2.77e-05	2.65e-08	5.03e-11	6.37e-09	2.14e-06	0.15	1.89e-05	0.00704	1.89e-11	1.54e-07	0.00877	8.1e-07	1.54e-10	9e-06	0.854	6.98e-05	5.81e-08	1.44e-10	1.5e-08	7e-06	0.242	5.04e-05	FALSE	TRUE	TRUE
O75223	GGCT	-0.441	0.726	0.819	0.715	0.978	1.17	1.26	1.16	1.42	0.0928	-0.0115	0.252	-0.104	0.159	0.264	0.000232	1.64e-06	4.33e-07	1.95e-06	5.67e-08	7.09e-09	2.83e-09	7.97e-09	6.7e-10	0.306	0.897	0.0127	0.253	0.0907	0.0099	0.000697	2.28e-06	1.27e-06	6.47e-06	2.36e-07	1.37e-08	1.69e-08	7.09e-08	4.41e-09	0.325	0.902	0.015	0.303	0.163	0.0157	FALSE	FALSE	FALSE
O75298	RTN2	NA	NA	NA	NA	NA	-2.66	-2.12	-0.0602	-1.88	0.538	2.6	0.778	2.06	0.239	-1.82	NA	NA	NA	NA	NA	5.2e-05	0.000309	0.88	0.000742	0.153	2.5e-05	0.0499	0.000164	0.507	0.000419	NA	NA	NA	NA	NA	6.73e-05	0.000651	0.911	0.00146	0.167	3.44e-05	0.0562	0.000375	0.617	0.000851	FALSE	FALSE	FALSE
O75312	ZPR1	NA	NA	NA	NA	NA	-3.29	NA	0.291	NA	NA	3.58	NA	NA	NA	NA	NA	NA	NA	NA	NA	3.52e-06	NA	0.219	NA	NA	4.09e-06	NA	NA	NA	NA	NA	NA	NA	NA	NA	5.03e-06	NA	0.296	NA	NA	6.11e-06	NA	NA	NA	NA	FALSE	FALSE	FALSE
O75340	PDCD6	-1.08	-1.78	-1.85	-0.949	-1.23	-0.697	-0.764	0.133	-0.145	-0.0672	0.83	0.552	0.897	0.619	-0.278	7.71e-08	2.01e-10	1.27e-10	3.47e-07	1.77e-08	9.81e-06	3.74e-06	0.201	0.167	0.509	1.53e-06	9.64e-05	6.49e-07	3.22e-05	0.0149	6.77e-07	4.25e-10	7.82e-10	1.35e-06	8.16e-08	1.34e-05	1.1e-05	0.275	0.211	0.527	2.41e-06	0.000139	2.39e-06	0.000225	0.0229	TRUE	TRUE	TRUE
O75342	ALOX12B	0.701	NA	1.6	1.21	1.53	NA	0.896	0.51	0.825	NA	NA	NA	-0.386	-0.0715	0.314	0.0207	NA	7.79e-05	0.000716	0.000115	NA	0.00548	0.0747	0.00889	NA	NA	NA	0.165	0.788	0.25	0.0369	NA	0.000161	0.00143	0.000251	NA	0.00945	0.118	0.0145	NA	NA	NA	0.208	0.849	0.299	FALSE	FALSE	TRUE
O75347	TBCA	-1.97	-4.74	-0.962	-0.798	NA	-2.76	1.01	1.18	NA	3.78	3.94	NA	0.165	NA	NA	0.000301	2.43e-06	0.0127	0.0445	NA	7.16e-06	0.0027	0.00403	NA	2.32e-06	6.84e-06	NA	0.564	NA	NA	0.000881	3.33e-06	0.0187	0.0634	NA	9.92e-06	0.00494	0.00896	NA	4.03e-06	9.99e-06	NA	0.614	NA	NA	TRUE	TRUE	FALSE
O75351	VPS4B	-0.126	-2.87	-0.284	-0.0234	0.024	-2.75	-0.158	0.103	0.15	2.59	2.85	2.9	0.261	0.308	0.0474	0.496	8.74e-10	0.139	0.899	0.896	1.51e-09	0.397	0.578	0.419	3.08e-09	9.65e-10	7.9e-10	0.172	0.111	0.797	0.572	1.7e-09	0.172	0.918	0.913	3.21e-09	0.459	0.662	0.48	7.68e-09	2.25e-09	2.13e-09	0.216	0.191	0.826	FALSE	TRUE	FALSE
O75368	SH3BGRL	NA	NA	NA	NA	NA	-3.02	-2.08	NA	-1.4	0.942	NA	1.62	NA	0.68	NA	NA	NA	NA	NA	NA	0.000178	0.00156	NA	0.0116	0.0143	NA	0.000895	NA	0.0512	NA	NA	NA	NA	NA	NA	0.000221	0.00295	NA	0.0185	0.0169	NA	0.00117	NA	0.104	NA	FALSE	FALSE	FALSE
O75369	FLNB	-0.569	-4.63	-4.44	-1.95	-4.33	-4.06	-3.87	-1.38	-3.76	0.191	2.68	0.3	2.49	0.109	-2.38	4.91e-13	1.43e-24	2.45e-24	8.47e-20	3.35e-24	7.58e-24	1.4e-23	6.78e-18	2.01e-23	2.68e-07	1.49e-21	1.34e-09	3.82e-21	9.69e-05	6.74e-21	4.1e-11	9.65e-22	2.8e-21	9.68e-17	3.83e-21	4.65e-21	1.57e-20	4.71e-15	2.47e-20	5.25e-07	1.52e-19	3.48e-09	2.51e-18	0.000553	3.65e-18	FALSE	TRUE	TRUE
O75379	VAMP4	NA	NA	NA	NA	NA	NA	NA	NA	NA	2.87	NA	NA	NA	NA	NA	NA	NA	NA	NA	NA	NA	NA	NA	NA	2.31e-06	NA	NA	NA	NA	NA	NA	NA	NA	NA	NA	NA	NA	NA	NA	4.02e-06	NA	NA	NA	NA	NA	FALSE	FALSE	FALSE
O75381	PEX14	0.151	-3.45	-4.99	-2.73	-4.81	-3.6	-5.14	-2.88	-4.96	-1.54	0.724	-1.36	2.26	0.181	-2.08	0.32	3.33e-10	9.64e-12	3.15e-09	1.38e-11	2.3e-11	7.45e-13	1.99e-10	1.05e-12	2.7e-08	2.36e-05	8.74e-08	6.95e-10	0.0898	1.54e-09	0.395	6.83e-10	8.04e-11	2.03e-08	1.26e-10	6.44e-11	1.12e-11	2.81e-09	1.5e-11	5.92e-08	3.28e-05	1.79e-07	5.49e-09	0.162	1.08e-08	FALSE	TRUE	TRUE
O75390	CS	-0.729	-5.52	-2.63	-0.915	-3.43	-4.79	-1.9	-0.187	-2.7	2.89	4.61	2.09	1.71	-0.807	-2.52	0.000394	3.43e-14	3.58e-10	5.01e-05	1.32e-11	2.04e-13	1.79e-08	0.245	2.5e-10	1.09e-10	3.36e-13	5.78e-09	6.01e-08	0.000162	5.99e-10	0.00112	1.29e-13	1.99e-09	0.000125	1.21e-10	7.96e-13	8.77e-08	0.325	1.86e-09	3.37e-10	1.36e-12	1.37e-08	2.77e-07	0.000858	4.64e-09	FALSE	TRUE	TRUE
O75396	SEC22B	-0.385	-4.3	-4.81	-2.7	-4.33	-3.91	-4.43	-2.31	-3.95	-0.518	1.6	-0.0359	2.12	0.482	-1.64	0.0043	1.44e-14	3.42e-15	4.99e-12	1.29e-14	4.7e-14	9.8e-15	3.39e-11	4.19e-14	0.000472	3.02e-09	0.752	9.91e-11	0.000846	2.31e-09	0.00916	5.82e-14	7.43e-14	8.03e-11	2.66e-13	2.08e-13	2.52e-13	6.45e-10	8.85e-13	0.000636	6.58e-09	0.766	1.07e-09	0.00342	1.53e-08	FALSE	TRUE	TRUE
O75410	TACC1	-0.761	-5	-3.7	-1.54	-3.4	-4.24	-2.94	-0.776	-2.64	1.3	3.46	1.6	2.16	0.301	-1.86	0.000164	1.15e-12	2.82e-11	2.5e-07	6.91e-11	1.66e-13	8.22e-12	6.53e-06	2.59e-11	4.03e-08	1.43e-12	4.76e-09	2.1e-10	0.00932	1.01e-09	0.00052	3.27e-12	2.09e-10	9.98e-07	5.39e-10	6.54e-13	9.58e-11	2.72e-05	2.55e-10	8.65e-08	5.19e-12	1.14e-08	2e-09	0.0256	7.29e-09	FALSE	TRUE	TRUE
O75436	VPS26A	-1.36	-4.72	-0.715	-0.848	-0.333	-3.37	0.643	0.511	1.03	4.01	3.88	4.39	-0.133	0.382	0.515	0.000217	2.39e-10	0.019	0.00734	0.233	1.43e-08	0.0315	0.0779	0.00208	1.77e-09	2.65e-09	5.85e-10	0.626	0.175	0.0757	0.000663	5e-10	0.027	0.0123	0.282	2.67e-08	0.0468	0.122	0.0038	4.56e-09	5.83e-09	1.61e-09	0.67	0.275	0.102	TRUE	TRUE	FALSE
O75439	PMPCB	NA	NA	NA	NA	NA	-3.95	-1.95	NA	-2.61	1.99	NA	1.33	NA	-0.66	NA	NA	NA	NA	NA	NA	1.28e-07	4.6e-06	NA	1.17e-06	1.06e-06	NA	6.99e-06	NA	0.000272	NA	NA	NA	NA	NA	NA	2.15e-07	1.33e-05	NA	3.81e-06	1.93e-06	NA	1.14e-05	NA	0.0013	NA	FALSE	FALSE	FALSE
O75446	SAP30	0.0304	0.0428	0.205	-0.59	0.415	0.0124	0.175	-0.621	0.385	0.162	-0.633	0.372	-0.795	0.21	1.01	0.872	0.821	0.289	0.00738	0.0437	0.948	0.364	0.0054	0.0589	0.398	0.00476	0.0663	0.000926	0.278	0.000126	0.901	0.827	0.335	0.0124	0.0616	0.95	0.425	0.0116	0.0824	0.417	0.00549	0.0742	0.00184	0.393	0.000284	FALSE	FALSE	FALSE
O75448	MED24	-0.499	-1.84	-0.794	-1.65	-0.453	-1.35	-0.295	-1.15	0.0468	1.05	0.193	1.39	-0.858	0.341	1.2	5.06e-05	1.61e-11	3.88e-07	6.33e-11	0.000127	7.84e-10	0.00384	5.08e-09	0.585	1.53e-08	0.0385	5.17e-10	1.62e-07	0.00134	3.15e-09	0.000185	3.95e-11	1.15e-06	7.05e-10	0.000276	1.74e-09	0.00681	4.72e-08	0.64	3.45e-08	0.0421	1.43e-09	6.85e-07	0.00506	1.99e-08	FALSE	TRUE	FALSE
O75462	CRLF1	-0.235	-2.08	-1.95	-0.494	-1.87	-1.84	-1.72	-0.259	-1.63	0.127	1.58	0.209	1.46	0.0812	-1.38	0.127	2.99e-09	6.39e-09	0.00466	1.06e-08	1.26e-08	2.93e-08	0.0968	5.16e-08	0.393	7.4e-08	0.172	1.94e-07	0.583	3.71e-07	0.18	5.45e-09	2.74e-08	0.00811	5.07e-08	2.35e-08	1.38e-07	0.149	2.22e-07	0.413	1.34e-07	0.186	8.03e-07	0.684	1.42e-06	FALSE	TRUE	TRUE
O75475	PSIP1	-0.665	-2.18	-1.66	-1.09	-1.31	-1.51	-0.993	-0.426	-0.649	0.521	1.09	0.865	0.567	0.344	-0.223	2.19e-11	7.11e-18	2.27e-16	4.47e-14	4.29e-15	7.19e-16	1.48e-13	5.04e-09	2.98e-11	4.43e-10	4.68e-14	8.34e-13	1.6e-10	6.41e-08	7.73e-06	8.26e-10	6.81e-17	6.91e-15	1.4e-12	9.87e-14	4.99e-15	2.75e-12	4.7e-08	2.83e-10	1.25e-09	2.26e-13	3.54e-12	1.57e-09	1.26e-06	2.2e-05	FALSE	TRUE	TRUE
O75477	ERLIN1	-0.267	-3.81	-3.78	-2.89	-3.92	-3.54	-3.51	-2.62	-3.66	0.0305	0.922	-0.113	0.892	-0.143	-1.04	0.409	1.78e-07	1.91e-07	2.2e-06	1.36e-07	3.93e-08	4.26e-08	6.37e-07	2.93e-08	0.886	0.00129	0.598	0.00162	0.504	0.000576	0.487	2.7e-07	5.99e-07	7.23e-06	5.21e-07	6.93e-08	1.93e-07	3.37e-06	1.33e-07	0.893	0.00155	0.615	0.00307	0.615	0.00114	FALSE	TRUE	TRUE
O75478	TADA2A	0.321	-0.517	0.511	0.19	0.162	-0.839	0.189	-0.131	-0.159	1.03	0.708	0.68	-0.321	-0.348	-0.0279	0.0442	0.00417	0.00452	0.333	0.271	5.85e-05	0.16	0.473	0.231	1.06e-05	0.00258	0.000305	0.0993	0.0193	0.877	0.0721	0.00466	0.00711	0.391	0.325	7.53e-05	0.205	0.565	0.283	1.7e-05	0.00302	0.000416	0.132	0.0468	0.894	FALSE	FALSE	FALSE
O75489	NDUFS3	NA	NA	NA	NA	NA	NA	NA	NA	NA	-1.84	1.17	-0.909	3.01	0.932	-2.08	NA	NA	NA	NA	NA	NA	NA	NA	NA	2e-05	0.00236	0.00141	7.88e-06	0.00123	8.26e-05	NA	NA	NA	NA	NA	NA	NA	NA	NA	3.12e-05	0.00277	0.0018	2.3e-05	0.00471	0.000192	FALSE	FALSE	FALSE
O75528	TADA3	-0.397	1.5	-1.21	-0.161	-1.04	1.89	-0.817	0.236	-0.639	-2.71	-1.66	-2.53	1.05	0.178	-0.875	0.0305	9.66e-07	8.04e-06	0.339	3.66e-05	2.32e-08	0.000115	0.129	0.000863	4.15e-10	9.96e-08	8.96e-10	1.08e-05	0.242	6.2e-05	0.052	1.36e-06	1.95e-05	0.396	8.72e-05	4.19e-08	0.000258	0.188	0.00168	1.17e-09	1.78e-07	2.39e-09	3.07e-05	0.354	0.000149	FALSE	TRUE	TRUE
O75529	TAF5L	-0.47	-1.21	-1.25	-0.632	-1.02	-0.737	-0.777	-0.162	-0.553	-0.0404	0.575	0.184	0.615	0.224	-0.391	0.00244	3.2e-07	2.2e-07	0.000234	2e-06	5.72e-05	3.42e-05	0.218	0.000718	0.751	0.000521	0.165	0.000293	0.0961	0.00811	0.00561	4.74e-07	6.81e-07	0.000519	5.91e-06	7.37e-05	8.4e-05	0.296	0.00141	0.764	0.000642	0.178	0.000642	0.171	0.013	FALSE	TRUE	TRUE
O75569	PRKRA	0.397	2.62	0.338	0.354	0.319	2.22	-0.0591	-0.0431	-0.0777	-2.28	-2.27	-2.3	0.0159	-0.0186	-0.0345	7.84e-11	3.64e-21	5.64e-10	3.22e-10	1.12e-09	2.94e-20	0.0129	0.0552	0.00229	2.11e-20	2.3e-20	1.9e-20	0.451	0.379	0.115	2.24e-09	1.62e-19	3.02e-09	2.87e-09	6.66e-09	1.2e-18	0.0209	0.0909	0.00416	1.54e-18	1.16e-18	1.08e-18	0.506	0.496	0.149	FALSE	TRUE	FALSE
O75586	MED6	-0.326	-0.895	-0.379	-1.54	-0.0803	-0.569	-0.0531	-1.21	0.245	0.516	-0.644	0.815	-1.16	0.298	1.46	0.0171	4.9e-06	0.0073	1.07e-08	0.511	0.000374	0.663	1.72e-07	0.0598	0.000835	0.000127	1.3e-05	2.86e-07	0.0263	2.02e-08	0.0312	6.53e-06	0.0111	5.91e-08	0.568	0.000455	0.717	1.06e-06	0.0836	0.00109	0.000164	2.06e-05	1.13e-06	0.0605	1.02e-07	FALSE	FALSE	FALSE
O75607	NPM3	-0.395	-0.658	0.106	-0.0595	0.632	-0.263	0.501	0.335	1.03	0.764	0.598	1.29	-0.166	0.526	0.692	0.0208	0.000734	0.555	0.674	0.00184	0.0912	0.0263	0.0562	0.000151	0.0024	0.00253	1.63e-05	0.392	0.0214	0.00185	0.037	0.000849	0.602	0.725	0.00332	0.0967	0.0399	0.0923	0.000335	0.003	0.00297	2.56e-05	0.448	0.051	0.00332	FALSE	FALSE	FALSE
O75628	REM1	-0.447	-2.64	-0.202	-0.554	-0.296	-2.19	0.245	-0.107	0.151	2.43	2.08	2.34	-0.352	-0.0935	0.258	0.00308	2.27e-11	0.124	0.000613	0.0319	2.25e-10	0.0679	0.399	0.24	6.11e-11	4.16e-10	9.9e-11	0.0135	0.46	0.0557	0.00685	5.46e-11	0.155	0.00125	0.0462	5.42e-10	0.0943	0.49	0.292	1.95e-10	1.03e-09	3.01e-10	0.0213	0.573	0.0771	FALSE	TRUE	FALSE
O75683	SURF6	0.284	3.67	0.199	0.404	0.337	3.39	-0.0848	0.12	0.0534	-3.47	-3.27	-3.33	0.205	0.138	-0.0667	0.000325	2.98e-17	0.00474	1.16e-05	6.88e-05	8.26e-17	0.17	0.0604	0.376	6.04e-17	1.31e-16	1.01e-16	0.00392	0.0342	0.274	0.000943	2.39e-16	0.00742	3.33e-05	0.000156	7.53e-16	0.216	0.0983	0.436	7.38e-16	1.2e-15	1.09e-15	0.00689	0.0755	0.323	FALSE	TRUE	FALSE
O75691	UTP20	0.0569	1.74	0.14	0.25	0.124	1.68	0.0826	0.193	0.0673	-1.6	-1.49	-1.62	0.11	-0.0153	-0.125	0.0805	8.49e-17	0.000479	1.68e-06	0.00121	1.29e-16	0.0167	2.49e-05	0.0433	2.45e-16	6.04e-16	2.17e-16	0.00292	0.618	0.00112	0.122	6.09e-16	0.000885	5.68e-06	0.00226	1.11e-15	0.0262	9.1e-05	0.0621	2.5e-15	4.63e-15	2.14e-15	0.00526	0.713	0.0021	FALSE	TRUE	FALSE
O75694	NUP155	-0.389	-2.19	-0.644	-0.266	-0.724	-1.8	-0.255	0.123	-0.335	1.55	1.92	1.47	0.378	-0.0802	-0.458	0.00249	2.75e-11	3.45e-05	0.0236	1.06e-05	3.06e-10	0.0289	0.257	0.00665	1.96e-09	1.36e-10	3.72e-09	0.00305	0.453	0.000724	0.0057	6.53e-11	7.54e-05	0.0358	2.78e-05	7.18e-10	0.0432	0.339	0.0111	5.03e-09	3.58e-10	9.02e-09	0.00547	0.567	0.00141	FALSE	TRUE	FALSE
O75717	WDHD1	-0.241	-1.67	0.395	0.303	0.152	-1.43	0.636	0.544	0.393	2.06	1.97	1.82	-0.092	-0.243	-0.151	0.00535	8.68e-12	0.00011	0.00105	0.0548	6e-11	8.57e-07	4.65e-06	0.000117	6.09e-13	1.08e-12	2.93e-12	0.223	0.00502	0.0559	0.0111	2.2e-11	0.000224	0.00204	0.0754	1.58e-10	2.93e-06	2e-05	0.000266	2.77e-12	4e-12	1.12e-11	0.272	0.0151	0.0773	FALSE	TRUE	FALSE
O75718	CRTAP	-0.14	-1.1	-1.15	-1.1	-1.23	-0.958	-1.01	-0.956	-1.09	-0.0538	0.00246	-0.128	0.0562	-0.0747	-0.131	0.278	8.19e-07	4.81e-07	8.4e-07	2.37e-07	3.6e-06	2.01e-06	3.7e-06	9.21e-07	0.671	0.984	0.318	0.657	0.556	0.309	0.352	1.16e-06	1.41e-06	3.01e-06	8.62e-07	5.15e-06	6.31e-06	1.62e-05	3.06e-06	0.687	0.984	0.337	0.698	0.661	0.36	FALSE	TRUE	TRUE
O75746	SLC25A12	NA	NA	NA	NA	NA	1.42	0.402	2.29	0.53	-1.02	0.869	-0.892	1.89	0.128	-1.76	NA	NA	NA	NA	NA	4.26e-10	1.71e-05	6.85e-12	1.85e-06	3.76e-10	1.51e-09	1.2e-09	1.8e-12	0.00432	3.32e-12	NA	NA	NA	NA	NA	9.8e-10	4.48e-05	1.73e-10	5.79e-06	1.07e-09	3.44e-09	3.13e-09	3.36e-11	0.0133	5.75e-11	FALSE	FALSE	FALSE
O75787	ATP6AP2	NA	NA	NA	NA	NA	-0.489	-0.824	1.15	-0.497	-0.335	1.64	-0.00772	1.97	0.327	-1.65	NA	NA	NA	NA	NA	0.0933	0.011	0.00151	0.0889	0.185	4.5e-05	0.974	9.35e-06	0.195	4.33e-05	NA	NA	NA	NA	NA	0.0988	0.0179	0.00373	0.119	0.2	6.07e-05	0.977	2.69e-05	0.3	0.000107	FALSE	FALSE	FALSE
O75794	CDC123	NA	NA	NA	NA	NA	-1.13	0.1	0.678	NA	1.23	1.81	NA	0.578	NA	NA	NA	NA	NA	NA	NA	4.17e-05	0.0422	0.000287	NA	3.31e-05	1.16e-05	NA	0.000443	NA	NA	NA	NA	NA	NA	NA	5.44e-05	0.0615	0.000836	NA	4.99e-05	1.66e-05	NA	0.000937	NA	NA	FALSE	FALSE	FALSE
O75815	BCAR3	0.711	-1.48	0.757	0.718	1.12	-2.19	0.046	0.00773	0.406	2.24	2.2	2.6	-0.0382	0.36	0.398	0.245	0.0215	0.167	0.241	0.0642	0.0048	0.925	0.989	0.424	0.00164	0.00473	0.000855	0.938	0.388	0.432	0.316	0.0232	0.205	0.293	0.0875	0.00545	0.94	0.992	0.484	0.00209	0.00546	0.00112	0.948	0.505	0.486	FALSE	FALSE	FALSE
O75822	EIF3J	-0.47	-2.1	-0.22	-1.1	-0.266	-1.63	0.25	-0.632	0.204	1.88	0.997	1.83	-0.882	-0.0462	0.835	7.08e-07	8.73e-15	0.00106	2.8e-11	0.000217	2.12e-13	0.000377	2.37e-08	0.00189	3.53e-14	9.63e-11	4.83e-14	4.34e-10	0.392	8.36e-10	4.54e-06	3.71e-14	0.00185	3.63e-10	0.000457	8.28e-13	0.000787	1.79e-07	0.00348	2.05e-13	2.62e-10	2.59e-13	3.64e-09	0.509	6.25e-09	FALSE	TRUE	FALSE
O75828	CBR3	NA	NA	NA	NA	NA	NA	NA	NA	NA	2.42	NA	NA	NA	NA	NA	NA	NA	NA	NA	NA	NA	NA	NA	NA	5.25e-06	NA	NA	NA	NA	NA	NA	NA	NA	NA	NA	NA	NA	NA	NA	8.75e-06	NA	NA	NA	NA	NA	FALSE	FALSE	FALSE
O75844	ZMPSTE24	NA	NA	NA	NA	NA	-4.54	-5.13	-3.24	-4.74	-0.585	1.31	-0.199	1.89	0.386	-1.51	NA	NA	NA	NA	NA	3.74e-10	1.05e-10	1.27e-08	2.39e-10	0.0189	7.79e-05	0.368	2.71e-06	0.0963	2.25e-05	NA	NA	NA	NA	NA	8.67e-10	8.89e-10	1.05e-07	1.79e-09	0.0221	0.000103	0.387	8.65e-06	0.171	5.89e-05	FALSE	FALSE	FALSE
O75874	IDH1	-0.394	-4.09	0.0312	-0.284	0.271	-3.7	0.426	0.11	0.666	4.12	3.81	4.36	-0.315	0.24	0.556	0.00134	4.49e-15	0.751	0.0116	0.0149	1.61e-14	0.000742	0.275	1.22e-05	4.07e-15	1.11e-14	1.99e-15	0.00627	0.0275	7.23e-05	0.00328	2.04e-14	0.786	0.0187	0.023	8e-14	0.00147	0.358	3.27e-05	3.02e-14	6.09e-14	1.52e-14	0.0106	0.0628	0.000171	FALSE	TRUE	FALSE
O75886	STAM2	NA	NA	NA	NA	NA	-3.34	NA	NA	NA	NA	NA	NA	NA	NA	NA	NA	NA	NA	NA	NA	0.00403	NA	NA	NA	NA	NA	NA	NA	NA	NA	NA	NA	NA	NA	NA	0.0046	NA	NA	NA	NA	NA	NA	NA	NA	NA	FALSE	FALSE	FALSE
O75914	PAK3	-0.916	-6.44	-1.63	-1.76	-1.2	-5.52	-0.71	-0.84	-0.284	4.81	4.69	5.24	-0.129	0.427	0.556	0.102	9.3e-08	0.00906	0.00583	0.0395	1.3e-08	0.0761	0.0411	0.45	5.3e-08	6.99e-08	2.23e-08	0.728	0.264	0.153	0.149	1.46e-07	0.0136	0.00994	0.0562	2.43e-08	0.105	0.0703	0.51	1.12e-07	1.27e-07	4.86e-08	0.765	0.378	0.193	FALSE	TRUE	FALSE
O75915	ARL6IP5	-0.408	-4.59	-4.43	-2.17	-4.18	-4.18	-4.02	-1.76	-3.78	0.165	2.42	0.407	2.26	0.242	-2.01	0.135	2.16e-09	3.16e-09	3.97e-06	5.66e-09	1.52e-10	2.32e-10	1.05e-06	4.46e-10	0.377	4.43e-08	0.0444	9.05e-08	0.203	2.83e-07	0.19	4.01e-09	1.45e-08	1.25e-05	2.88e-08	3.76e-10	1.82e-09	5.28e-06	3.1e-09	0.397	8.3e-08	0.0502	4.04e-07	0.309	1.11e-06	FALSE	TRUE	TRUE
O75947	ATP5PD	NA	NA	NA	NA	NA	NA	NA	NA	NA	NA	NA	NA	1.53	0.189	-1.34	NA	NA	NA	NA	NA	NA	NA	NA	NA	NA	NA	NA	0.00182	0.56	0.00366	NA	NA	NA	NA	NA	NA	NA	NA	NA	NA	NA	NA	0.0034	0.664	0.00623	FALSE	FALSE	FALSE
O75955	FLOT1	-0.235	-3.73	-3.08	-0.617	-2.91	-3.49	-2.84	-0.383	-2.68	0.649	3.11	0.814	2.46	0.165	-2.3	0.1	7.76e-13	8.47e-12	0.000473	1.68e-11	1.75e-12	2.27e-11	0.0129	4.74e-11	0.000308	7.44e-12	3.86e-05	1.35e-10	0.236	3.15e-10	0.147	2.29e-12	7.18e-11	0.000981	1.49e-10	5.79e-12	2.34e-10	0.0251	4.28e-10	0.000421	2.41e-11	5.82e-05	1.37e-09	0.346	2.67e-09	FALSE	TRUE	TRUE
O75962	TRIO	-0.257	-1.63	-0.505	-0.00697	-0.308	-1.38	-0.248	0.25	-0.0504	1.13	1.63	1.33	0.498	0.197	-0.301	0.00574	2.92e-11	2.22e-05	0.93	0.00169	2.41e-10	0.00731	0.00681	0.528	2.69e-09	3.08e-11	3.81e-10	2.55e-05	0.0251	0.002	0.0118	6.9e-11	5.03e-05	0.943	0.00307	5.78e-10	0.0124	0.0142	0.585	6.76e-09	9.17e-11	1.07e-09	6.7e-05	0.0582	0.00356	FALSE	TRUE	FALSE
O75970	MPDZ	NA	NA	NA	NA	NA	NA	NA	NA	NA	NA	NA	1.74	NA	NA	NA	NA	NA	NA	NA	NA	NA	NA	NA	NA	NA	NA	6.82e-05	NA	NA	NA	NA	NA	NA	NA	NA	NA	NA	NA	NA	NA	NA	9.97e-05	NA	NA	NA	FALSE	FALSE	FALSE
O75976	CPD	NA	NA	NA	NA	NA	-2.82	-2.49	0.0922	-2.08	0.325	2.91	0.739	2.59	0.414	-2.17	NA	NA	NA	NA	NA	1.16e-07	3.25e-07	0.623	1.47e-06	0.0325	4.6e-09	0.000302	1.27e-08	0.0107	5.6e-08	NA	NA	NA	NA	NA	1.95e-07	1.2e-06	0.703	4.69e-06	0.0372	9.78e-09	0.000413	6.87e-08	0.0285	2.56e-07	FALSE	FALSE	FALSE
O76024	WFS1	NA	NA	NA	NA	NA	NA	NA	NA	NA	-0.0658	2.65	0.5	2.71	0.566	-2.15	NA	NA	NA	NA	NA	NA	NA	NA	NA	0.564	8.16e-07	0.00272	6.94e-07	0.00139	3.22e-06	NA	NA	NA	NA	NA	NA	NA	NA	NA	0.582	1.32e-06	0.00338	2.54e-06	0.00521	1e-05	FALSE	FALSE	FALSE
O76071	CIAO1	-0.0914	-2.83	0.485	0.815	0.425	-2.73	0.576	0.906	0.516	3.31	3.64	3.25	0.33	-0.06	-0.39	0.752	4.32e-07	0.112	0.0139	0.159	1.87e-07	0.042	0.00384	0.064	2.33e-08	8.12e-09	2.85e-08	0.216	0.816	0.149	0.803	6.31e-07	0.142	0.022	0.2	3.07e-07	0.0612	0.00861	0.0888	5.14e-08	1.67e-08	6.14e-08	0.264	0.868	0.187	FALSE	TRUE	FALSE
O76094	SRP72	0.764	1.19	1.25	1.54	0.542	0.425	0.483	0.772	-0.222	0.0578	0.347	-0.647	0.289	-0.705	-0.994	4.44e-14	1.66e-16	9.1e-17	6.48e-18	3.3e-12	6.75e-11	1.39e-11	3.92e-14	1.6e-07	0.0193	8.19e-10	3.59e-13	7.39e-09	1.22e-13	1.61e-15	6.34e-12	1.09e-15	3.16e-15	1.59e-15	3.46e-11	1.76e-10	1.51e-10	2.05e-12	6.26e-07	0.0226	1.94e-09	1.64e-12	4.29e-08	3.72e-11	9.54e-14	FALSE	TRUE	TRUE
O77727	KRT15	-0.504	0.44	0.532	0.381	0.631	0.944	1.04	0.885	1.13	0.0918	-0.0594	0.191	-0.151	0.099	0.25	1.2e-05	4.56e-05	6.79e-06	0.000175	1.09e-06	1.07e-08	3.53e-09	2.31e-08	1.17e-09	0.23	0.43	0.0216	0.0589	0.198	0.00458	5.25e-05	5.72e-05	1.66e-05	0.000398	3.45e-06	2.02e-08	2.04e-08	1.75e-07	7.35e-09	0.247	0.444	0.025	0.082	0.304	0.00768	FALSE	FALSE	FALSE
O94760	DDAH1	NA	NA	NA	NA	NA	-4.49	-0.961	-0.00278	-0.962	3.53	4.49	3.53	0.958	-0.00115	-0.959	NA	NA	NA	NA	NA	1.73e-10	0.000472	0.989	0.000467	2.15e-09	1.74e-10	2.16e-09	0.000482	0.995	0.000478	NA	NA	NA	NA	NA	4.22e-10	0.000969	0.992	0.000952	5.49e-09	4.51e-10	5.45e-09	0.00101	0.997	0.000961	FALSE	FALSE	FALSE
O94776	MTA2	-0.221	-0.74	0.289	-0.314	0.242	-0.519	0.51	-0.0934	0.462	1.03	0.425	0.981	-0.603	-0.0473	0.556	2.27e-07	9.14e-14	9.88e-09	3.63e-09	8.05e-08	7.75e-12	9.65e-12	0.00106	3.23e-11	1.43e-15	9.06e-11	2.58e-15	1.18e-12	0.0529	3.28e-12	1.71e-06	3.18e-13	4.05e-08	2.3e-08	3.26e-07	2.29e-11	1.1e-10	0.0027	3.03e-10	1.19e-14	2.48e-10	1.9e-14	2.33e-11	0.107	5.73e-11	FALSE	FALSE	FALSE
O94782	USP1	-0.272	-3.98	NA	NA	0.72	-3.71	NA	NA	0.992	NA	NA	4.7	NA	NA	NA	0.391	0.000107	NA	NA	0.0451	0.000138	NA	NA	0.0174	NA	NA	2.43e-05	NA	NA	NA	0.468	0.00013	NA	NA	0.0633	0.000173	NA	NA	0.0269	NA	NA	3.73e-05	NA	NA	NA	FALSE	TRUE	FALSE
O94804	STK10	-2.17	-4.2	-1.47	-1.07	-2.05	-2.03	0.693	1.09	0.118	2.72	3.13	2.15	0.4	-0.575	-0.975	0.036	0.000267	0.0703	0.168	0.0192	0.0199	0.358	0.161	0.872	0.000487	0.000185	0.00228	0.449	0.285	0.0867	0.0601	0.000318	0.0915	0.212	0.0291	0.0219	0.42	0.228	0.891	0.000654	0.000237	0.00287	0.505	0.401	0.115	FALSE	TRUE	FALSE
O94806	PRKD3	0.11	-0.0289	0.506	2.77	0.4	-0.139	0.396	2.66	0.29	0.535	2.8	0.429	2.26	-0.106	-2.37	0.526	0.854	0.00822	1.95e-08	0.0264	0.385	0.0277	2.86e-08	0.0882	0.00308	7.49e-09	0.011	5.5e-08	0.457	3.59e-08	0.602	0.859	0.0124	1.01e-07	0.0389	0.397	0.0416	2.1e-07	0.118	0.00383	1.55e-08	0.013	2.56e-07	0.57	1.71e-07	FALSE	FALSE	FALSE
O94826	TOMM70	NA	NA	NA	NA	NA	NA	NA	NA	NA	-0.266	2.11	0.121	2.37	0.387	-1.98	NA	NA	NA	NA	NA	NA	NA	NA	NA	0.00286	2.13e-10	0.0957	7.6e-11	0.000239	3.55e-10	NA	NA	NA	NA	NA	NA	NA	NA	NA	0.00356	5.44e-10	0.106	8.5e-10	0.00119	2.95e-09	FALSE	FALSE	FALSE
O94832	MYO1D	-0.594	-1.68	-1.69	-0.641	-1.93	-1.09	-1.1	-0.0471	-1.34	-0.0114	1.04	-0.251	1.05	-0.24	-1.29	2.75e-05	1.99e-10	1.84e-10	1.28e-05	3.58e-11	3.76e-08	3.33e-08	0.623	3.19e-09	0.905	6.3e-08	0.0188	5.55e-08	0.0237	4.9e-09	0.000109	4.22e-10	1.08e-09	3.62e-05	2.99e-10	6.66e-08	1.55e-07	0.703	1.78e-08	0.911	1.16e-07	0.0219	2.58e-07	0.0554	2.95e-08	FALSE	TRUE	TRUE
O94842	TOX4	-1.25	-1.48	-0.65	-1.19	-1.12	-0.228	0.601	0.0602	0.128	0.828	0.288	0.356	-0.54	-0.472	0.068	0.00599	0.00193	0.111	0.0081	0.0114	0.559	0.138	0.877	0.741	0.0486	0.462	0.366	0.179	0.236	0.861	0.0123	0.00219	0.141	0.0134	0.0179	0.569	0.18	0.908	0.776	0.055	0.476	0.385	0.224	0.346	0.881	FALSE	TRUE	FALSE
O94851	MICAL2	-1.06	-3.06	-3.65	-1.85	-3.34	-1.99	-2.58	-0.79	-2.27	-0.59	1.2	-0.28	1.79	0.31	-1.48	0.018	3.39e-06	4.92e-07	0.000419	1.31e-06	0.000223	1.94e-05	0.0656	6.73e-05	0.157	0.0091	0.488	0.000548	0.443	0.00235	0.0327	4.59e-06	1.43e-06	0.000881	4.09e-06	0.000276	5.01e-05	0.106	0.000159	0.17	0.0103	0.506	0.00114	0.558	0.00413	FALSE	TRUE	TRUE
O94855	SEC24D	-0.0483	-3.27	0.189	0.356	0.19	-3.22	0.238	0.404	0.238	3.46	3.63	3.46	0.167	0.000669	-0.166	0.58	1.57e-14	0.0451	0.00113	0.0444	1.89e-14	0.0156	0.000403	0.0154	7.71e-15	4.25e-15	7.69e-15	0.0723	0.994	0.0734	0.653	6.29e-14	0.0603	0.00217	0.0625	9.24e-14	0.0247	0.00113	0.024	5.3e-14	2.57e-14	4.91e-14	0.0988	0.996	0.0989	FALSE	TRUE	FALSE
O94874	UFL1	0.186	-1.92	-2.06	-0.865	-1.89	-2.1	-2.25	-1.05	-2.08	-0.147	1.05	0.0232	1.2	0.17	-1.03	0.514	1.18e-05	5.48e-06	0.00827	1.33e-05	4.5e-06	2.19e-06	0.00232	5.06e-06	0.605	0.00229	0.934	0.000858	0.55	0.00268	0.59	1.53e-05	1.36e-05	0.0137	3.41e-05	6.37e-06	6.81e-06	0.0055	1.46e-05	0.623	0.0027	0.94	0.00172	0.657	0.00467	FALSE	TRUE	TRUE
O94875	SORBS2	-0.25	-2.78	-5.12	-2.23	-5.13	-2.53	-4.87	-1.98	-4.88	-2.34	0.549	-2.35	2.89	-0.0117	-2.9	0.162	5.9e-10	3e-13	8.39e-09	2.91e-13	1.86e-09	5.62e-13	3.43e-08	5.45e-13	4.64e-09	0.00643	4.37e-09	3.62e-10	0.946	3.45e-10	0.222	1.18e-09	3.76e-12	4.77e-08	4.04e-12	3.89e-09	8.75e-12	2.46e-07	8.5e-12	1.13e-08	0.00736	1.05e-08	3.15e-09	0.962	2.88e-09	FALSE	TRUE	TRUE
O94887	FARP2	0.317	2.08	0.292	0.329	0.18	1.77	-0.0249	0.012	-0.137	-1.79	-1.75	-1.9	0.0369	-0.112	-0.149	0.367	3.88e-05	0.405	0.35	0.605	0.000181	0.943	0.972	0.693	0.000159	0.000192	9.15e-05	0.915	0.746	0.668	0.444	4.88e-05	0.455	0.408	0.655	0.000225	0.955	0.983	0.734	0.000223	0.000245	0.000133	0.93	0.82	0.709	FALSE	TRUE	FALSE
O94888	UBXN7	-0.606	-3.11	0.114	0.366	0.214	-2.5	0.72	0.972	0.821	3.22	3.48	3.32	0.252	0.101	-0.151	0.00293	1.16e-10	0.504	0.0458	0.218	1.63e-09	0.000816	5.89e-05	0.000275	7.43e-11	2.93e-11	5.09e-11	0.152	0.553	0.377	0.00655	2.52e-10	0.553	0.0651	0.265	3.45e-09	0.0016	0.000199	0.000585	2.35e-10	8.76e-11	1.61e-10	0.194	0.659	0.429	FALSE	TRUE	FALSE
O94903	PLPBP	0.108	-3.29	-0.355	0.382	0.249	-3.39	-0.463	0.275	0.141	2.93	3.67	3.54	0.737	0.604	-0.133	0.534	9.99e-10	0.0591	0.0444	0.203	2.21e-10	0.0108	0.0957	0.418	1.03e-09	9.75e-11	4.65e-10	0.000505	0.00438	0.445	0.609	1.94e-09	0.0778	0.0634	0.249	5.33e-10	0.0177	0.147	0.479	2.74e-09	2.64e-10	1.29e-09	0.00106	0.0134	0.499	FALSE	TRUE	FALSE
O94916	NFAT5	-0.0848	-1.69	-0.0708	-0.22	-0.0761	-1.61	0.014	-0.135	0.00867	1.62	1.47	1.62	-0.149	-0.00534	0.144	0.347	7.38e-11	0.43	0.0252	0.397	1.39e-10	0.874	0.143	0.922	1.25e-10	4.08e-10	1.3e-10	0.109	0.952	0.121	0.424	1.65e-10	0.48	0.0377	0.456	3.45e-10	0.897	0.207	0.932	3.8e-10	1.01e-09	3.89e-10	0.143	0.965	0.156	FALSE	TRUE	FALSE
O94925	GLS	1.27	-3.13	-2.15	-0.781	-2.62	-4.4	-3.42	-2.05	-3.89	0.976	2.34	0.503	1.37	-0.473	-1.84	0.00654	1.45e-05	0.000196	0.0868	5.03e-05	2.05e-07	1.34e-06	0.000392	5.11e-07	0.00305	0.000109	0.0614	0.00319	0.0746	0.000536	0.0133	1.87e-05	0.000384	0.117	0.000117	3.36e-07	4.38e-06	0.0011	1.8e-06	0.00378	0.000142	0.0688	0.00571	0.14	0.00107	FALSE	TRUE	TRUE
O94966	USP19	NA	NA	NA	NA	NA	-3.63	-1.6	-0.87	-1.46	2.04	2.76	2.18	0.726	0.14	-0.586	NA	NA	NA	NA	NA	3.44e-10	7.74e-07	0.000326	1.77e-06	8.24e-08	1.35e-08	4.43e-08	0.00119	0.353	0.0047	NA	NA	NA	NA	NA	8.01e-10	2.67e-06	0.000932	5.57e-06	1.71e-07	2.68e-08	9.35e-08	0.00232	0.471	0.00786	FALSE	FALSE	FALSE
O94973	AP2A2	-0.735	-3.27	-1.55	-0.864	-1.31	-2.54	-0.817	-0.129	-0.58	1.72	2.41	1.95	0.688	0.236	-0.451	6.56e-07	8.37e-15	9.39e-11	1.05e-07	7.11e-10	2.07e-13	2e-07	0.136	8.34e-06	2.65e-11	3.98e-13	5.35e-12	1.36e-06	0.0122	9.85e-05	4.24e-06	3.58e-14	5.96e-10	4.57e-07	4.44e-09	8.06e-13	7.72e-07	0.198	2.31e-05	8.98e-11	1.59e-12	1.95e-11	4.68e-06	0.032	0.000226	FALSE	TRUE	TRUE
O94979	SEC31A	-0.246	-4.18	-0.133	0.302	0.136	-3.94	0.113	0.548	0.381	4.05	4.49	4.32	0.435	0.268	-0.166	0.0457	1.96e-14	0.254	0.0177	0.243	4.21e-14	0.327	0.00029	0.00454	2.95e-14	8.15e-15	1.31e-14	0.00184	0.0314	0.158	0.0741	7.72e-14	0.298	0.0275	0.293	1.87e-13	0.389	0.000843	0.00785	1.74e-13	4.6e-14	7.97e-14	0.00343	0.0702	0.198	FALSE	TRUE	FALSE
O95049	TJP3	0.0827	-1.58	-1.36	-0.51	-1.36	-1.66	-1.44	-0.593	-1.44	0.221	1.07	0.223	0.849	0.00254	-0.846	0.132	2.52e-13	1.66e-12	2.32e-07	1.7e-12	1.33e-13	7.92e-13	4.11e-08	8.09e-13	0.000904	3.27e-11	0.000826	5.59e-10	0.961	5.8e-10	0.185	8.15e-13	1.69e-11	9.3e-07	1.94e-11	5.35e-13	1.18e-11	2.9e-07	1.19e-11	0.00118	9.7e-11	0.00108	4.53e-09	0.972	4.51e-09	FALSE	TRUE	TRUE
O95081	AGFG2	0.671	-1.74	0.5	0.231	-0.117	-2.41	-0.171	-0.44	-0.789	2.24	1.97	1.62	-0.269	-0.618	-0.349	0.0535	0.000109	0.137	0.477	0.716	4.23e-06	0.597	0.187	0.0269	9.14e-06	3.32e-05	0.000204	0.409	0.0725	0.29	0.0848	0.000132	0.17	0.536	0.755	6.02e-06	0.656	0.258	0.0403	1.48e-05	4.52e-05	0.000285	0.465	0.137	0.34	FALSE	TRUE	FALSE
O95140	MFN2	NA	NA	NA	NA	NA	NA	NA	NA	NA	-0.711	2.85	-0.483	3.57	0.228	-3.34	NA	NA	NA	NA	NA	NA	NA	NA	NA	5.4e-05	5.99e-08	0.000561	1.36e-08	0.0244	2.11e-08	NA	NA	NA	NA	NA	NA	NA	NA	NA	7.93e-05	1.1e-07	0.000748	7.31e-08	0.0569	1.06e-07	FALSE	FALSE	FALSE
O95155	UBE4B	NA	NA	NA	NA	NA	-3.68	0.469	NA	NA	4.15	NA	NA	NA	NA	NA	NA	NA	NA	NA	NA	3.77e-05	0.0544	NA	NA	1.01e-05	NA	NA	NA	NA	NA	NA	NA	NA	NA	NA	4.93e-05	0.0774	NA	NA	1.63e-05	NA	NA	NA	NA	NA	FALSE	FALSE	FALSE
O95159	ZFPL1	-0.568	-4.28	-2.76	-1.21	-2.48	-3.72	-2.19	-0.642	-1.91	1.52	3.07	1.8	1.55	0.282	-1.27	0.00655	1.68e-11	2.5e-09	1.57e-05	8.36e-09	2.39e-11	9.45e-09	0.00138	4.32e-08	4.97e-07	2.1e-10	8.06e-08	4.1e-07	0.0927	3.28e-06	0.0133	4.1e-11	1.18e-08	4.37e-05	4.07e-08	6.65e-11	4.95e-08	0.00344	1.89e-07	9.4e-07	5.38e-10	1.66e-07	1.57e-06	0.166	1.02e-05	FALSE	TRUE	TRUE
O95197	RTN3	-0.88	-4.31	-3.25	-1.46	-2.88	-3.43	-2.37	-0.579	-2	1.06	2.85	1.43	1.79	0.37	-1.42	7.62e-10	1.69e-18	6.12e-17	1.47e-12	2.83e-16	3.06e-17	3.35e-15	1.1e-07	2.86e-14	7.58e-11	3.19e-16	1.85e-12	1.15e-13	1.45e-05	2.11e-12	1.44e-08	2e-17	2.36e-15	2.83e-11	9.07e-15	3.16e-16	1.09e-13	7.16e-07	6.49e-13	2.39e-10	2.64e-15	7.32e-12	3.59e-12	0.000117	3.9e-11	FALSE	TRUE	TRUE
O95199	RCBTB2	0.383	-1.12	0.0687	1.03	0.961	-1.51	-0.315	0.642	0.578	1.19	2.15	2.09	0.956	0.893	-0.0636	0.472	0.0536	0.926	0.105	0.0908	0.0151	0.673	0.289	0.286	0.131	0.00396	0.00238	0.242	0.247	0.914	0.55	0.057	0.939	0.138	0.12	0.0167	0.726	0.374	0.342	0.144	0.0046	0.00298	0.292	0.358	0.924	FALSE	FALSE	FALSE
O95202	LETM1	NA	NA	NA	NA	NA	NA	NA	NA	NA	-1.19	1.02	-0.584	2.21	0.605	-1.6	NA	NA	NA	NA	NA	NA	NA	NA	NA	4.78e-06	0.000117	0.000405	8.11e-07	0.000332	6.58e-06	NA	NA	NA	NA	NA	NA	NA	NA	NA	7.99e-06	0.000152	0.000547	2.93e-06	0.00155	1.9e-05	FALSE	FALSE	FALSE
O95208	EPN2	NA	NA	NA	NA	NA	-2.45	NA	-1.06	-1.41	NA	1.38	1.04	NA	NA	-0.345	NA	NA	NA	NA	NA	0.00506	NA	0.133	0.0682	NA	0.0609	0.122	NA	NA	0.619	NA	NA	NA	NA	NA	0.00574	NA	0.194	0.0939	NA	0.0659	0.133	NA	NA	0.666	FALSE	FALSE	FALSE
O95219	SNX4	-0.598	-3.23	-0.375	0.278	-0.451	-2.63	0.223	0.876	0.147	2.85	3.5	2.77	0.653	-0.0764	-0.729	0.00618	2.53e-10	0.0613	0.152	0.0285	3.05e-09	0.243	0.000369	0.435	1.14e-09	9.13e-11	1.58e-09	0.00349	0.683	0.00159	0.0126	5.24e-10	0.0804	0.193	0.0417	6.25e-09	0.298	0.00105	0.495	3.01e-09	2.5e-10	4.06e-09	0.0062	0.768	0.00289	FALSE	TRUE	FALSE
O95239	KIF4A	-0.151	-2.11	-0.164	0.0589	-0.299	-1.96	-0.0138	0.209	-0.149	1.95	2.17	1.82	0.223	-0.135	-0.358	0.0266	4.68e-14	0.0172	0.345	0.000269	1.19e-13	0.821	0.00414	0.0283	1.3e-13	3.31e-14	3.19e-13	0.00268	0.0434	5.2e-05	0.0459	1.69e-13	0.0247	0.403	0.000557	4.86e-13	0.853	0.00917	0.0422	6.69e-13	1.65e-13	1.47e-12	0.00485	0.0908	0.000127	FALSE	TRUE	FALSE
O95248	SBF1	-0.264	-1.38	-1.3	-0.534	-1.19	-1.12	-1.03	-0.271	-0.923	0.0834	0.847	0.196	0.764	0.112	-0.652	4.06e-05	1.52e-13	3.32e-13	1.8e-08	1.03e-12	2.16e-12	5.68e-12	3.12e-05	2.37e-11	0.0757	6.77e-11	0.000584	2.42e-10	0.022	1.68e-09	0.000153	5.08e-13	4.13e-12	9.42e-08	1.25e-11	7.04e-12	7.04e-11	0.000111	2.37e-10	0.0842	1.89e-10	0.000778	2.25e-09	0.0522	1.16e-08	FALSE	TRUE	TRUE
O95249	GOSR1	-1.58	-3.18	-2.91	-1.81	-2.63	-1.6	-1.32	-0.23	-1.04	0.274	1.37	0.556	1.09	0.281	-0.812	0.0107	7.53e-05	0.000161	0.00487	0.000364	0.00113	0.00401	0.54	0.0156	0.466	0.00324	0.155	0.0121	0.455	0.0474	0.0205	9.25e-05	0.000319	0.00842	0.000737	0.00133	0.00709	0.627	0.0243	0.484	0.00379	0.168	0.0193	0.568	0.0664	FALSE	TRUE	TRUE
O95292	VAPB	-0.312	-3.6	-4.6	-2.3	-4.13	-3.29	-4.29	-1.98	-3.82	-1	1.31	-0.531	2.3	0.469	-1.84	0.517	3.93e-06	2.66e-07	0.000307	8.85e-07	1.01e-05	5.85e-07	0.00102	2.09e-06	0.0528	0.0156	0.278	0.000296	0.335	0.00182	0.593	5.29e-06	8.08e-07	0.000664	2.87e-06	1.39e-05	2.07e-06	0.00261	6.5e-06	0.0596	0.0175	0.296	0.000647	0.452	0.00327	FALSE	TRUE	TRUE
O95302	FKBP9	-0.399	-3.61	-1.59	-0.669	-2.32	-3.21	-1.19	-0.27	-1.92	2.02	2.94	1.29	0.919	-0.73	-1.65	1.72e-06	3.22e-18	1.03e-13	4.54e-09	8.73e-16	1.43e-17	3.89e-12	9.18e-05	9.5e-15	5.01e-15	4.34e-17	1.42e-12	9.44e-11	1.57e-09	6.4e-14	9.67e-06	3.46e-17	1.47e-12	2.79e-08	2.43e-14	1.67e-16	4.97e-11	0.000299	2.65e-13	3.61e-14	4.61e-16	5.75e-12	1.03e-09	7.26e-08	1.96e-12	FALSE	TRUE	TRUE
O95336	PGLS	NA	NA	NA	NA	NA	NA	NA	NA	NA	6.48	NA	NA	NA	NA	NA	NA	NA	NA	NA	NA	NA	NA	NA	NA	3.63e-07	NA	NA	NA	NA	NA	NA	NA	NA	NA	NA	NA	NA	NA	NA	6.95e-07	NA	NA	NA	NA	NA	FALSE	FALSE	FALSE
O95347	SMC2	-0.368	-2.43	-0.663	-0.164	-0.508	-2.06	-0.295	0.204	-0.139	1.76	2.26	1.92	0.499	0.155	-0.343	2.54e-09	1.38e-19	1.83e-12	2.17e-05	5.05e-11	1.11e-18	3.61e-08	2.29e-06	0.000106	7.9e-18	3.35e-19	2.71e-18	6.3e-11	3.77e-05	5.92e-09	4.07e-08	2.54e-18	1.84e-11	5.85e-05	4.07e-10	1.92e-17	1.66e-07	1.06e-05	0.000243	1.4e-16	8.16e-18	5.25e-17	7.27e-10	0.000254	3.49e-08	FALSE	TRUE	FALSE
O95359	TACC2	NA	NA	NA	NA	NA	-1.66	-0.178	0.286	0.0138	1.48	1.95	1.68	0.464	0.192	-0.272	NA	NA	NA	NA	NA	1.46e-05	0.0102	0.00294	0.656	1.98e-05	9.48e-06	1.43e-05	0.000801	0.00837	0.00335	NA	NA	NA	NA	NA	1.97e-05	0.0167	0.00679	0.701	3.09e-05	1.37e-05	2.25e-05	0.00161	0.0233	0.00573	FALSE	FALSE	FALSE
O95365	ZBTB7A	0.695	1.64	0.898	0.499	0.388	0.943	0.203	-0.196	-0.307	-0.74	-1.14	-1.25	-0.399	-0.51	-0.111	1.74e-09	4.21e-14	7.61e-11	8.85e-08	1.5e-06	4.2e-11	0.000754	0.000985	1.75e-05	8.25e-10	4.01e-12	1.26e-12	1.1e-06	6.85e-08	0.0322	2.91e-08	1.54e-13	5.02e-10	3.89e-07	4.6e-06	1.12e-10	0.00149	0.00254	4.57e-05	2.24e-09	1.36e-11	5.13e-12	3.85e-06	1.33e-06	0.0466	FALSE	TRUE	FALSE
O95373	IPO7	-0.399	-2.6	0.11	0.269	-0.061	-2.2	0.509	0.668	0.338	2.71	2.87	2.54	0.159	-0.171	-0.33	0.000538	3.64e-13	0.228	0.00877	0.496	2.93e-12	6.18e-05	4e-06	0.00195	2.17e-13	1.06e-13	4.91e-13	0.0913	0.0715	0.00232	0.00146	1.14e-12	0.271	0.0144	0.554	9.35e-12	0.000145	1.73e-05	0.00358	1.06e-12	4.79e-13	2.18e-12	0.122	0.136	0.00409	FALSE	TRUE	FALSE
O95379	TNFAIP8	NA	NA	NA	NA	NA	NA	NA	NA	NA	1.79	0.855	1.14	-0.936	-0.653	0.283	NA	NA	NA	NA	NA	NA	NA	NA	NA	1.61e-05	0.000482	0.000658	0.000536	0.0121	0.149	NA	NA	NA	NA	NA	NA	NA	NA	NA	2.53e-05	0.000598	0.00087	0.00112	0.0317	0.188	FALSE	FALSE	FALSE
O95391	SLU7	0.106	-0.341	0.098	-1.24	-0.0555	-0.448	-0.00822	-1.34	-0.162	0.439	-0.895	0.286	-1.33	-0.153	1.18	0.0435	7.75e-06	0.0596	2e-12	0.263	4.12e-07	0.865	7.12e-13	0.00476	5.07e-07	1.1e-10	4.58e-05	7.69e-13	0.00662	3.54e-12	0.071	1.02e-05	0.0784	3.62e-11	0.315	6.51e-07	0.889	2.47e-11	0.0082	9.58e-07	2.96e-10	6.83e-05	1.66e-11	0.019	6.02e-11	FALSE	FALSE	FALSE
O95425	SVIL	-0.381	-2.69	-2.97	-0.574	-3.29	-2.31	-2.59	-0.193	-2.91	-0.279	2.12	-0.599	2.4	-0.32	-2.72	0.00119	4.52e-13	1.31e-13	3.24e-05	3.62e-14	3.04e-12	7.31e-13	0.0557	1.7e-13	0.00961	9e-12	2.12e-05	1.93e-12	0.00413	4.02e-13	0.00293	1.39e-12	1.84e-12	8.38e-05	6.61e-13	9.63e-12	1.11e-11	0.0917	3.02e-12	0.0115	2.88e-11	3.28e-05	3.55e-11	0.0128	9.53e-12	FALSE	TRUE	TRUE
O95433	AHSA1	-0.384	-4.05	-0.466	-0.304	-0.0804	-3.66	-0.0824	0.0797	0.304	3.58	3.74	3.97	0.162	0.386	0.224	0.013	2.92e-13	0.00399	0.04	0.556	1.02e-12	0.547	0.559	0.0403	1.35e-12	7.77e-13	3.75e-13	0.245	0.0126	0.117	0.0245	9.3e-13	0.00634	0.0577	0.61	3.52e-12	0.609	0.645	0.0583	5.72e-12	2.95e-12	1.71e-12	0.295	0.0327	0.15	FALSE	TRUE	FALSE
O95456	PSMG1	NA	NA	NA	NA	NA	-3.45	0.0054	0.0582	0.135	3.45	3.51	3.58	0.0528	0.129	0.0765	NA	NA	NA	NA	NA	3.41e-07	0.985	0.842	0.68	3.36e-07	2.93e-07	6.66e-07	0.856	0.692	0.814	NA	NA	NA	NA	NA	5.45e-07	0.988	0.881	0.722	6.48e-07	4.95e-07	1.23e-06	0.88	0.774	0.84	FALSE	FALSE	FALSE
O95470	SGPL1	-0.431	-2.8	-3.9	-2.19	-3.6	-2.37	-3.47	-1.76	-3.17	-1.1	0.604	-0.8	1.7	0.299	-1.4	2.93e-06	4.04e-16	6.06e-18	8.76e-15	1.67e-17	3.36e-15	2.68e-17	1.38e-13	8.42e-17	4.99e-11	6.73e-08	2.42e-09	2.11e-13	0.000114	2.38e-12	1.52e-05	2.36e-15	3.35e-16	3.95e-13	8.29e-16	2e-14	1.58e-15	6.02e-12	4.13e-15	1.62e-10	1.23e-07	6.06e-09	5.88e-12	0.000631	4.31e-11	FALSE	TRUE	TRUE
O95478	NSA2	0.237	2.29	0.459	0.304	0.299	2.05	0.223	0.0674	0.0628	-1.83	-1.99	-1.99	-0.155	-0.16	-0.0046	2.08e-05	2.79e-17	1.35e-08	1.51e-06	1.78e-06	1.11e-16	3.81e-05	0.0855	0.106	4.75e-16	1.7e-16	1.65e-16	0.000923	0.000732	0.901	8.6e-05	2.26e-16	5.4e-08	5.14e-06	5.35e-06	9.81e-16	9.3e-05	0.133	0.14	4.49e-15	1.53e-15	1.7e-15	0.00183	0.00308	0.914	FALSE	TRUE	FALSE
O95486	SEC24A	0.412	-1.16	0.619	-0.00301	1.53	-1.58	0.207	-0.415	1.11	1.78	1.16	2.69	-0.622	0.907	1.53	0.0218	3.07e-05	0.00253	0.987	3.54e-06	1.54e-07	0.0805	0.0211	2.74e-06	5.43e-08	3.13e-05	1.61e-09	0.00246	1.42e-05	3.48e-06	0.0385	3.89e-05	0.00416	0.989	1e-05	2.56e-07	0.11	0.039	8.32e-06	1.15e-07	4.27e-05	4.12e-09	0.00448	0.000116	1.07e-05	FALSE	TRUE	FALSE
O95487	SEC24B	-0.804	-3.09	-0.342	-0.284	-0.68	-2.29	0.462	0.521	0.125	2.75	2.81	2.41	0.0583	-0.338	-0.396	1.91e-06	1.8e-13	0.00405	0.0126	1.13e-05	7.78e-12	0.000418	0.000148	0.225	7.81e-13	6e-13	4.02e-12	0.562	0.0044	0.00143	1.05e-05	5.91e-13	0.00643	0.0202	2.93e-05	2.29e-11	0.000867	0.000456	0.277	3.47e-12	2.32e-12	1.5e-11	0.612	0.0134	0.00263	FALSE	TRUE	FALSE
O95490	ADGRL2	-0.528	-5.38	0.44	-0.493	NA	-4.86	0.968	0.0345	NA	5.83	4.89	NA	-0.934	NA	NA	0.00237	1.21e-10	0.0316	0.00633	NA	2.68e-10	0.000485	0.802	NA	9.49e-10	5.97e-10	NA	0.000883	NA	NA	0.00546	2.63e-10	0.0435	0.0107	NA	6.35e-10	0.000994	0.85	NA	2.55e-09	1.44e-09	NA	0.00176	NA	NA	FALSE	TRUE	FALSE
O95544	NADK	NA	NA	NA	NA	NA	-5.59	NA	-1.98	NA	NA	3.62	NA	NA	NA	NA	NA	NA	NA	NA	NA	5.4e-07	NA	1.58e-05	NA	NA	1.76e-06	NA	NA	NA	NA	NA	NA	NA	NA	NA	8.42e-07	NA	6.04e-05	NA	NA	2.75e-06	NA	NA	NA	NA	FALSE	FALSE	FALSE
O95563	MPC2	NA	NA	NA	NA	NA	NA	NA	NA	NA	-0.765	0.692	-0.397	1.46	0.368	-1.09	NA	NA	NA	NA	NA	NA	NA	NA	NA	3.37e-05	0.000513	0.00168	4.98e-06	0.00254	3.21e-05	NA	NA	NA	NA	NA	NA	NA	NA	NA	5.08e-05	0.000634	0.00212	1.51e-05	0.00859	8.13e-05	FALSE	FALSE	FALSE
O95571	ETHE1	NA	NA	NA	NA	NA	-1.42	-0.913	0.773	-0.85	0.511	2.2	0.574	1.69	0.0628	-1.62	NA	NA	NA	NA	NA	0.00297	0.0258	0.0732	0.027	0.0681	0.000333	0.0321	0.00174	0.792	0.00157	NA	NA	NA	NA	NA	0.00341	0.0392	0.116	0.0404	0.0761	0.000419	0.0367	0.00326	0.851	0.00286	FALSE	FALSE	FALSE
O95573	ACSL3	0.0103	-2.1	-3.37	-1.12	-2.97	-2.11	-3.38	-1.13	-2.98	-1.27	0.975	-0.873	2.24	0.397	-1.85	0.945	2.92e-09	8.77e-12	3.72e-06	4.15e-11	2.75e-09	8.45e-12	3.38e-06	3.98e-11	9.84e-07	1.62e-05	4.78e-05	1.29e-09	0.0175	1.33e-08	0.958	5.32e-09	7.38e-11	1.17e-05	3.42e-10	5.65e-09	9.78e-11	1.49e-05	3.66e-10	1.8e-06	2.29e-05	7.12e-05	9.25e-09	0.0432	7.11e-08	FALSE	TRUE	TRUE
O95602	POLR1A	-0.378	-0.725	-1.53	-0.802	-1.24	-0.347	-1.15	-0.424	-0.861	-0.802	-0.0765	-0.513	0.725	0.289	-0.437	5.38e-09	1.78e-12	1.5e-16	5.08e-13	2.12e-15	1.46e-08	5.45e-15	1.34e-09	2.08e-13	5.06e-13	0.016	1.3e-10	1.78e-12	1.27e-07	9.36e-10	7.47e-08	4.96e-12	4.76e-15	1.13e-11	5.19e-14	2.7e-08	1.61e-13	1.52e-08	3.61e-12	2.33e-12	0.0178	3.89e-10	3.34e-11	2.17e-06	6.86e-09	FALSE	FALSE	TRUE
O95619	YEATS4	-0.449	-1.51	-0.551	-0.808	-0.392	-1.06	-0.102	-0.359	0.0575	0.961	0.704	1.12	-0.257	0.159	0.417	5.4e-05	5.54e-11	7.01e-06	1.02e-07	0.000192	4.08e-09	0.202	0.000406	0.461	1.35e-08	4.95e-07	2.16e-09	0.00487	0.0558	0.00011	0.000196	1.27e-10	1.71e-05	4.46e-07	0.000406	8.17e-09	0.253	0.00114	0.521	3.08e-08	8.21e-07	5.46e-09	0.00838	0.112	0.000249	FALSE	TRUE	FALSE
O95625	ZBTB11	0.288	2.66	0.88	0.579	0.546	2.37	0.592	0.291	0.258	-1.78	-2.08	-2.12	-0.301	-0.334	-0.0325	2.26e-05	5.59e-17	6.13e-11	9.95e-09	1.97e-08	2.39e-16	7.62e-09	2.08e-05	6.61e-05	8.96e-15	1.25e-15	1.02e-15	1.45e-05	5.02e-06	0.477	9.27e-05	4.23e-16	4.16e-10	5.54e-08	9e-08	1.88e-15	4.06e-08	7.71e-05	0.000156	6.07e-14	8.65e-15	8.32e-15	4.01e-05	4.79e-05	0.531	FALSE	TRUE	FALSE
O95674	CDS2	-0.531	-3.96	-5.55	-3.18	-4.92	-3.43	-5.02	-2.65	-4.39	-1.59	0.777	-0.958	2.37	0.633	-1.74	0.178	5.73e-07	2.5e-08	4.06e-06	7.78e-08	2.49e-07	7.05e-09	2.56e-06	2.51e-08	7.62e-05	0.01	0.00298	2.58e-06	0.0272	3.75e-05	0.241	8.27e-07	9.38e-08	1.27e-05	3.16e-07	4.03e-07	3.79e-08	1.16e-05	1.16e-07	0.00011	0.0113	0.0037	8.27e-06	0.0623	9.36e-05	FALSE	TRUE	TRUE
O95677	EYA4	-0.777	-2.62	-0.679	-0.403	-0.419	-1.84	0.0983	0.374	0.358	1.94	2.22	2.2	0.276	0.26	-0.0162	0.000117	3.54e-10	0.000368	0.0128	0.0103	5.33e-09	0.44	0.0105	0.0134	2.98e-09	6.65e-10	7.22e-10	0.0451	0.057	0.897	0.000385	7.22e-10	0.000695	0.0205	0.0164	1.05e-08	0.503	0.0209	0.0211	7.44e-09	1.59e-09	1.96e-09	0.0646	0.113	0.911	FALSE	TRUE	FALSE
O95696	BRD1	0.22	2.55	0.656	0.123	0.323	2.33	0.435	-0.0976	0.103	-1.9	-2.43	-2.23	-0.533	-0.333	0.201	0.000709	3.96e-16	8.55e-09	0.0284	2.2e-05	1.24e-15	9.55e-07	0.0717	0.0592	1.69e-14	7.39e-16	2.2e-15	9.73e-08	1.66e-05	0.00147	0.00185	2.33e-15	3.55e-08	0.0423	5.44e-05	8.16e-15	3.23e-06	0.114	0.0828	1.07e-13	5.46e-15	1.65e-14	4.32e-07	0.00013	0.0027	FALSE	TRUE	FALSE
O95716	RAB3D	NA	NA	NA	NA	NA	-1.31	-0.876	0.967	-0.791	0.43	2.27	0.516	1.84	0.0856	-1.76	NA	NA	NA	NA	NA	5.17e-05	0.000736	0.000571	0.00138	0.00605	1.59e-07	0.00222	7.69e-07	0.478	1.1e-06	NA	NA	NA	NA	NA	6.68e-05	0.00146	0.00156	0.0026	0.00733	2.79e-07	0.00279	2.79e-06	0.589	3.75e-06	FALSE	FALSE	FALSE
O95747	OXSR1	0.161	-3.51	0.142	-0.223	0.474	-3.67	-0.0189	-0.384	0.313	3.66	3.29	3.99	-0.365	0.332	0.697	0.33	1.57e-11	0.389	0.183	0.0108	8.99e-12	0.907	0.0313	0.0706	9.58e-12	3.54e-11	3.24e-12	0.039	0.0571	0.000766	0.407	3.84e-11	0.439	0.229	0.017	2.63e-11	0.925	0.0555	0.0969	3.46e-11	1.04e-10	1.23e-11	0.0567	0.113	0.00148	FALSE	TRUE	FALSE
O95757	HSPA4L	-0.293	-3.9	-0.837	-0.57	-0.62	-3.61	-0.544	-0.277	-0.327	3.07	3.33	3.28	0.267	0.217	-0.0498	0.12	1.48e-11	0.000393	0.00654	0.00381	3.88e-11	0.00871	0.139	0.0859	2.89e-10	1.04e-10	1.25e-10	0.153	0.239	0.781	0.171	3.63e-11	0.000736	0.011	0.00652	1.04e-10	0.0145	0.202	0.115	8.34e-10	2.81e-10	3.76e-10	0.196	0.351	0.813	FALSE	TRUE	FALSE
O95772	STARD3NL	-0.839	-2.85	-2.47	-1.7	-2.74	-2.01	-1.64	-0.858	-1.9	0.379	1.16	0.111	0.777	-0.268	-1.04	0.000908	2.51e-09	1.38e-08	1.04e-06	4.05e-09	1.52e-07	1.56e-06	0.000758	2.9e-07	0.0746	5.5e-05	0.579	0.00163	0.194	0.000141	0.00232	4.61e-09	5.48e-08	3.66e-06	2.12e-08	2.52e-07	5.03e-06	0.002	1.07e-06	0.0831	7.36e-05	0.597	0.00307	0.299	0.000316	FALSE	TRUE	TRUE
O95782	AP2A1	-0.231	-2.26	-0.879	-0.577	-0.814	-2.03	-0.647	-0.346	-0.582	1.38	1.68	1.44	0.301	0.0648	-0.236	2.24e-06	1.65e-18	2.52e-13	4.74e-11	6.6e-13	6.51e-18	1.15e-11	2.33e-08	4.25e-11	8.51e-16	6.98e-17	4.76e-16	1.17e-07	0.0413	1.77e-06	1.19e-05	1.97e-17	3.26e-12	5.55e-10	8.47e-12	8.35e-17	1.28e-10	1.76e-07	3.9e-10	7.46e-15	6.84e-16	4.17e-15	5.11e-07	0.0871	5.84e-06	FALSE	TRUE	FALSE
O95793	STAU1	0.106	1.76	-0.0128	0.238	0.141	1.66	-0.119	0.132	0.0346	-1.78	-1.52	-1.62	0.251	0.154	-0.0976	0.0143	1.18e-15	0.738	2.72e-05	0.00246	2.59e-15	0.00743	0.00378	0.372	1.08e-15	7.42e-15	3.39e-15	1.61e-05	0.0013	0.022	0.0267	6.26e-15	0.774	7.16e-05	0.00433	1.6e-14	0.0125	0.00849	0.431	9.22e-15	4.25e-14	2.38e-14	4.41e-05	0.00494	0.0328	FALSE	TRUE	FALSE
O95816	BAG2	-0.337	-1.89	-0.624	-0.115	-0.95	-1.55	-0.287	0.222	-0.612	1.26	1.77	0.94	0.509	-0.325	-0.834	0.0827	1.17e-07	0.00411	0.531	0.000153	1.07e-06	0.133	0.237	0.00467	9.51e-06	2.4e-07	0.000168	0.014	0.0929	0.00047	0.125	1.81e-07	0.00652	0.589	0.000329	1.62e-06	0.174	0.317	0.00807	1.54e-05	4.12e-07	0.000236	0.0221	0.166	0.000948	FALSE	TRUE	FALSE
O95817	BAG3	0.0541	-2.98	-1.55	0.793	-1.96	-3.03	-1.61	0.739	-2.02	1.43	3.77	1.02	2.35	-0.41	-2.76	0.935	0.000542	0.0331	0.245	0.01	0.000467	0.0283	0.277	0.00857	0.0474	6.69e-05	0.143	0.00328	0.539	0.00101	0.95	0.000631	0.0454	0.297	0.0159	0.000564	0.0425	0.36	0.014	0.0537	8.9e-05	0.155	0.00585	0.647	0.0019	FALSE	TRUE	FALSE
O95825	CRYZL1	NA	NA	NA	NA	NA	-2	-1.41	NA	-0.184	0.59	NA	1.82	NA	1.23	NA	NA	NA	NA	NA	NA	0.000665	0.00688	NA	0.5	0.0696	NA	0.000216	NA	0.00534	NA	NA	NA	NA	NA	NA	0.000796	0.0117	NA	0.559	0.0776	NA	0.0003	NA	0.0159	NA	FALSE	FALSE	FALSE
O95831	AIFM1	NA	NA	NA	NA	NA	-2.04	-2.78	-0.928	-2.2	-0.738	1.11	-0.161	1.85	0.577	-1.27	NA	NA	NA	NA	NA	1.16e-07	6.4e-09	0.000113	5.72e-08	0.000281	9.91e-06	0.257	1.02e-07	0.00162	3.05e-06	NA	NA	NA	NA	NA	1.95e-07	3.46e-08	0.000361	2.43e-07	0.000386	1.43e-05	0.274	4.5e-07	0.00594	9.56e-06	FALSE	FALSE	FALSE
O95835	LATS1	-0.0952	1.89	0.359	-0.162	0.194	1.98	0.454	-0.067	0.289	-1.53	-2.05	-1.69	-0.521	-0.165	0.356	0.716	4.6e-05	0.191	0.645	0.502	1.32e-05	0.0768	0.839	0.284	9.75e-05	0.000144	0.000104	0.139	0.531	0.323	0.775	5.77e-05	0.231	0.698	0.56	1.79e-05	0.106	0.879	0.34	0.00014	0.000187	0.00015	0.179	0.64	0.373	FALSE	TRUE	FALSE
O95864	FADS2	NA	NA	NA	NA	NA	-3.24	-4.94	-1.55	-4.65	-1.7	1.7	-1.41	3.4	0.295	-3.1	NA	NA	NA	NA	NA	6.66e-10	1.72e-11	7.88e-07	2.94e-11	6.38e-08	1.69e-07	3.17e-07	4.43e-10	0.0182	9.7e-10	NA	NA	NA	NA	NA	1.49e-09	1.83e-10	4.05e-06	2.8e-10	1.33e-07	2.94e-07	6.11e-07	3.7e-09	0.0449	7.08e-09	FALSE	FALSE	FALSE
O95865	DDAH2	NA	NA	NA	NA	NA	-3.61	-2.03	0.331	-1.81	1.58	3.94	1.8	2.36	0.215	-2.14	NA	NA	NA	NA	NA	5.31e-07	0.000109	0.354	0.000273	0.000775	2.22e-07	0.000291	2.93e-05	0.541	6.78e-05	NA	NA	NA	NA	NA	8.29e-07	0.000245	0.442	0.000581	0.00102	3.83e-07	0.000398	7.64e-05	0.649	0.000162	FALSE	FALSE	FALSE
O95870	ABHD16A	0.574	2.01	1.15	-0.337	1.12	1.44	0.577	-0.911	0.551	-0.862	-2.35	-0.889	-1.49	-0.0263	1.46	9.65e-06	2.89e-11	1e-08	0.000843	1.27e-08	2.57e-11	3.26e-07	3.14e-09	5.18e-07	5.52e-09	1.4e-13	4.04e-09	1.81e-11	0.623	2.19e-11	4.31e-05	6.83e-11	4.11e-08	0.00166	6.02e-08	7.09e-11	1.21e-06	3.14e-08	1.82e-06	1.33e-08	6.16e-13	9.75e-09	2.43e-10	0.718	2.69e-10	FALSE	TRUE	TRUE
O95881	TXNDC12	-1.01	-4.04	-0.979	-0.837	-1.94	-3.03	0.0256	0.168	-0.934	3.06	3.2	2.1	0.143	-0.96	-1.1	0.000766	1.65e-09	0.000927	0.00276	2.66e-06	8.83e-10	0.87	0.296	8.65e-05	8.08e-10	5.01e-10	3.98e-08	0.372	6.86e-05	2.02e-05	0.00198	3.11e-09	0.00164	0.00503	7.73e-06	1.94e-09	0.895	0.381	0.0002	2.2e-09	1.22e-09	8.43e-08	0.428	0.000419	5.35e-05	TRUE	TRUE	FALSE
O95905	ECD	0.274	-2.5	0.384	-0.292	-0.778	-2.78	0.11	-0.566	-1.05	2.89	2.21	1.72	-0.676	-1.16	-0.486	0.581	0.000246	0.441	0.598	0.133	0.0001	0.823	0.315	0.0504	7.06e-05	0.00156	0.00397	0.234	0.0334	0.386	0.653	0.000292	0.492	0.654	0.17	0.000126	0.855	0.401	0.0714	0.000103	0.00186	0.00487	0.284	0.0742	0.439	FALSE	TRUE	FALSE
O95969	SCGB1D2	-0.988	NA	1.22	0.86	-0.334	NA	2.21	1.85	0.654	NA	NA	NA	-0.365	-1.56	-1.19	0.00166	NA	0.000365	0.00401	0.223	NA	2.77e-06	1.33e-05	0.0296	NA	NA	NA	0.144	0.000135	0.000979	0.00397	NA	0.000689	0.00707	0.271	NA	8.44e-06	5.17e-05	0.044	NA	NA	NA	0.185	0.000732	0.00185	FALSE	FALSE	TRUE
O95985	TOP3B	-0.257	-1.34	-1.13	-0.281	-0.912	-1.08	-0.876	-0.024	-0.656	0.205	1.06	0.425	0.852	0.22	-0.632	2.5e-05	8.77e-14	7.08e-13	1.01e-05	1.06e-11	1.27e-12	1.75e-11	0.558	6.18e-10	0.000206	1.68e-12	1.06e-07	2.47e-11	0.000107	9.72e-10	0.000101	3.06e-13	8e-12	2.93e-05	9.91e-11	4.29e-12	1.85e-10	0.645	4.11e-09	0.000287	6.02e-12	2.16e-07	3.16e-10	0.000602	7.08e-09	FALSE	TRUE	TRUE
O96005	CLPTM1	NA	NA	NA	NA	NA	NA	NA	NA	NA	-0.939	1.62	-0.195	2.56	0.744	-1.81	NA	NA	NA	NA	NA	NA	NA	NA	NA	4.05e-09	3.69e-11	0.00107	6.92e-13	2.97e-08	1.37e-11	NA	NA	NA	NA	NA	NA	NA	NA	NA	9.95e-09	1.08e-10	0.00138	1.55e-11	6.64e-07	1.83e-10	FALSE	FALSE	FALSE
O96008	TOMM40	NA	NA	NA	NA	NA	NA	NA	NA	NA	-0.768	3.27	-0.801	4.04	-0.0333	-4.07	NA	NA	NA	NA	NA	NA	NA	NA	NA	0.0803	1.79e-05	0.07	3.31e-06	0.934	3.1e-06	NA	NA	NA	NA	NA	NA	NA	NA	NA	0.0891	2.52e-05	0.0782	1.05e-05	0.954	9.68e-06	FALSE	FALSE	FALSE
O96011	PEX11B	0.0286	-2.93	-3.56	-1.83	-3.18	-2.96	-3.59	-1.86	-3.21	-0.63	1.1	-0.255	1.73	0.375	-1.35	0.812	2.95e-11	3.74e-12	4.1e-09	1.22e-11	2.67e-11	3.44e-12	3.49e-09	1.11e-11	4.52e-05	2.37e-07	0.0226	2.31e-09	0.00253	2.89e-08	0.853	6.97e-11	3.38e-11	2.58e-08	1.13e-10	7.33e-11	4.42e-11	3.41e-08	1.21e-10	6.72e-05	4.08e-07	0.0262	1.53e-08	0.00856	1.41e-07	FALSE	TRUE	TRUE
O96013	PAK4	NA	NA	NA	NA	NA	-2.85	-0.545	2.16	-0.506	2.3	5.01	2.34	2.71	0.0387	-2.67	NA	NA	NA	NA	NA	0.00188	0.29	0.00971	0.262	0.00395	0.000244	0.00163	0.00455	0.925	0.00291	NA	NA	NA	NA	NA	0.00218	0.349	0.0195	0.316	0.00487	0.00031	0.00207	0.00789	0.948	0.00503	FALSE	FALSE	FALSE
P00167	CYB5A	NA	NA	NA	NA	NA	NA	-5.71	-3.66	-5.36	NA	NA	NA	2.05	0.356	-1.69	NA	NA	NA	NA	NA	NA	3.28e-11	6.46e-10	5.05e-11	NA	NA	NA	3.09e-09	0.000269	1.11e-08	NA	NA	NA	NA	NA	NA	3.22e-10	7.82e-09	4.48e-10	NA	NA	NA	2e-08	0.00129	6.05e-08	FALSE	FALSE	FALSE
P00338	LDHA	-0.248	-4.71	0.215	-0.148	0.821	-4.47	0.463	0.1	1.07	4.93	4.57	5.53	-0.363	0.606	0.969	0.00077	8.62e-19	0.0023	0.0216	2.77e-09	1.71e-18	2.01e-06	0.1	1.11e-10	4.9e-19	1.29e-18	1.12e-19	2.54e-05	9.99e-08	3.7e-10	0.00199	1.12e-17	0.00381	0.0329	1.51e-08	2.68e-17	6.31e-06	0.153	8.95e-10	1.51e-17	2.44e-17	4.28e-18	6.67e-05	1.77e-06	3.05e-09	FALSE	TRUE	FALSE
P00367	GLUD1.1	-0.052	-3.08	-2.46	-1.01	-2.72	-3.03	-2.4	-0.956	-2.67	0.625	2.07	0.361	1.45	-0.264	-1.71	0.83	1.06e-08	1.49e-07	0.001	4.59e-08	1.29e-08	1.91e-07	0.0015	5.75e-08	0.0211	1.01e-06	0.153	4.21e-05	0.287	7.84e-06	0.868	1.82e-08	4.81e-07	0.00195	1.96e-07	2.42e-08	7.43e-07	0.00372	2.44e-07	0.0246	1.62e-06	0.166	0.000107	0.403	2.23e-05	FALSE	TRUE	TRUE
P00374	DHFR	-0.309	-4.94	-0.134	NA	NA	-4.63	0.176	NA	NA	4.81	NA	NA	NA	NA	NA	0.191	2.93e-06	0.541	NA	NA	1.32e-06	0.34	NA	NA	1.11e-06	NA	NA	NA	NA	NA	0.256	3.99e-06	0.589	NA	NA	1.98e-06	0.402	NA	NA	2.01e-06	NA	NA	NA	NA	NA	FALSE	TRUE	FALSE
P00387	CYB5R3	-0.0522	-3.55	-4.83	-2.84	-4.14	-3.5	-4.78	-2.79	-4.08	-1.28	0.71	-0.586	1.99	0.698	-1.3	0.834	2.66e-09	6.14e-11	3.78e-08	4.17e-10	3.18e-09	7.02e-11	4.69e-08	4.87e-10	0.000165	0.0124	0.0323	2.04e-06	0.0136	0.000151	0.871	4.87e-09	4.16e-10	1.81e-07	2.76e-09	6.48e-09	6.25e-10	3.27e-07	3.36e-09	0.00023	0.0139	0.0369	6.74e-06	0.0348	0.000337	FALSE	TRUE	TRUE
P00390	GSR	NA	NA	NA	NA	NA	NA	NA	NA	NA	NA	6.18	-0.86	NA	NA	-7.04	NA	NA	NA	NA	NA	NA	NA	NA	NA	NA	3.07e-08	6.2e-05	NA	NA	1.66e-08	NA	NA	NA	NA	NA	NA	NA	NA	NA	NA	5.88e-08	9.11e-05	NA	NA	8.7e-08	FALSE	FALSE	FALSE
P00441	SOD1	-0.0522	-4.54	0.683	-0.106	NA	-4.48	0.735	-0.0537	NA	5.22	4.43	NA	-0.789	NA	NA	0.716	6.11e-10	0.000631	0.562	NA	1.57e-09	0.000801	0.78	NA	2.08e-10	1.04e-08	NA	0.00216	NA	NA	0.775	1.21e-09	0.00115	0.619	NA	3.33e-09	0.00157	0.833	NA	6.17e-10	2.1e-08	NA	0.00396	NA	NA	FALSE	TRUE	FALSE
P00491	PNP	0.142	-1.4	0.475	0.717	0.0825	-1.54	0.333	0.574	-0.0599	1.88	2.12	1.48	0.241	-0.393	-0.634	0.808	0.0367	0.425	0.266	0.894	0.00422	0.43	0.234	0.897	0.00128	0.0012	0.00964	0.605	0.405	0.231	0.849	0.0393	0.476	0.32	0.912	0.00481	0.492	0.314	0.912	0.00165	0.00145	0.0115	0.652	0.522	0.278	FALSE	FALSE	FALSE
P00492	HPRT1	NA	NA	NA	NA	NA	-5.72	0.456	0.209	0.826	6.17	5.93	6.54	-0.247	0.37	0.617	NA	NA	NA	NA	NA	5.42e-09	0.213	0.556	0.0357	2.45e-09	3.74e-09	1.33e-09	0.489	0.306	0.101	NA	NA	NA	NA	NA	1.07e-08	0.265	0.642	0.0522	6.2e-09	8.06e-09	3.46e-09	0.544	0.423	0.132	FALSE	FALSE	FALSE
P00505	GOT2	0.0975	-3.95	-1.14	0.205	-2.06	-4.04	-1.24	0.107	-2.15	2.8	4.15	1.89	1.35	-0.914	-2.26	0.698	8.02e-10	0.000482	0.42	1.58e-06	5.96e-10	0.000239	0.67	9.52e-07	4.73e-08	4.33e-10	3.9e-06	0.000114	0.00266	5.56e-07	0.759	1.57e-09	0.00089	0.48	4.83e-06	1.34e-09	0.00051	0.744	3.15e-06	1.01e-07	1.07e-09	6.59e-06	0.000267	0.0089	2.04e-06	FALSE	TRUE	TRUE
P00558	PGK1	-0.378	-5.15	-0.000316	-0.318	0.778	-4.77	0.378	0.0608	1.16	5.15	4.83	5.92	-0.317	0.778	1.1	2.95e-06	3.41e-20	0.995	1.82e-05	7.08e-10	9.01e-20	2.98e-06	0.227	5.32e-12	3.42e-20	7.67e-20	5.71e-21	1.84e-05	7.05e-10	1.04e-11	1.53e-05	8.54e-19	0.996	4.98e-05	4.43e-09	2.63e-18	8.99e-06	0.305	6.3e-11	2.04e-18	2.73e-18	4.18e-19	4.98e-05	3.98e-08	1.49e-10	FALSE	TRUE	FALSE
P00568	AK1	-0.992	-5.56	-2.11	-0.885	-1.6	-4.57	-1.12	0.107	-0.605	3.45	4.67	3.96	1.22	0.511	-0.712	1.29e-05	1.53e-14	2.58e-09	4e-05	6.91e-08	1.82e-13	3.76e-06	0.474	0.00111	6.06e-12	1.36e-13	1.08e-12	1.41e-06	0.00378	0.000294	5.58e-05	6.14e-14	1.21e-08	0.000102	2.83e-07	7.14e-13	1.11e-05	0.565	0.00211	2.27e-11	6.01e-13	4.46e-12	4.8e-06	0.0119	0.000617	FALSE	TRUE	TRUE
P00711	LALBA	-0.729	-0.751	-0.826	-0.587	-2.54	-0.0218	-0.0965	0.142	-1.81	-0.0747	0.164	-1.79	0.239	-1.71	-1.95	6.46e-06	4.73e-06	1.72e-06	5.66e-05	2.6e-12	0.829	0.35	0.177	1.73e-10	0.466	0.123	2e-10	0.0324	3.37e-10	6.81e-11	3e-05	6.33e-06	4.59e-06	0.00014	2.83e-11	0.833	0.411	0.247	1.34e-09	0.485	0.132	5.82e-10	0.0479	2.34e-08	7.17e-10	FALSE	FALSE	FALSE
P00761	P00761	-0.0731	0.327	0.089	-0.728	-0.0491	0.4	0.162	-0.655	0.0241	-0.238	-1.05	-0.376	-0.817	-0.138	0.679	0.447	0.00398	0.357	3.32e-06	0.608	0.00092	0.106	1.01e-05	0.8	0.0245	5.22e-08	0.00148	9.5e-07	0.163	6.94e-06	0.526	0.00446	0.407	1.05e-05	0.657	0.00109	0.141	4.06e-05	0.827	0.0283	9.69e-08	0.00189	3.39e-06	0.259	1.99e-05	FALSE	FALSE	FALSE
P00883	ALDOA	-0.551	-5.09	0.0598	-0.482	0.902	-4.54	0.611	0.0688	1.45	5.15	4.61	5.99	-0.542	0.842	1.38	3.08e-11	1.9e-23	0.041	1.59e-10	6.49e-14	8.15e-23	8.57e-12	0.0217	1.57e-16	1.64e-23	6.74e-23	2.39e-24	3.77e-11	1.54e-13	2.9e-16	1.1e-09	4.28e-21	0.0553	1.55e-09	1.11e-12	1.88e-20	9.89e-11	0.0401	7.05e-15	1.54e-20	1.61e-20	4.65e-21	4.58e-10	4.34e-11	2.16e-14	FALSE	TRUE	FALSE
P00966	ASS1	-0.211	-3.71	0.264	0.0845	0.259	-3.5	0.474	0.295	0.47	3.97	3.79	3.97	-0.179	-0.00405	0.175	1.5e-05	9.2e-21	1.41e-06	0.0181	1.67e-06	1.93e-20	1.54e-09	4.01e-07	1.71e-09	3.85e-21	6.91e-21	3.9e-21	7.35e-05	0.899	9.11e-05	6.39e-05	3.17e-19	3.82e-06	0.0279	5.06e-06	9.25e-19	9.94e-09	2.22e-06	1.03e-08	4.33e-19	5.1e-19	3.22e-19	0.000178	0.93	0.00021	FALSE	TRUE	FALSE
P01008	SERPINC1	-0.374	-2.34	-0.611	-0.0469	-0.471	-1.97	-0.237	0.327	-0.0968	1.73	2.3	1.87	0.564	0.14	-0.424	0.214	3.28e-06	0.0536	0.872	0.125	6.12e-06	0.371	0.224	0.71	2.13e-05	1.29e-06	1.01e-05	0.0474	0.593	0.122	0.282	4.45e-06	0.0711	0.894	0.16	8.53e-06	0.432	0.302	0.75	3.29e-05	2.05e-06	1.61e-05	0.0677	0.692	0.157	FALSE	TRUE	FALSE
P01012	SERPINB14	0.631	-2.36	0.88	0.545	0.714	-2.99	0.249	-0.086	0.0825	3.23	2.9	3.07	-0.335	-0.166	0.168	0.000191	8.41e-11	7.7e-06	0.000664	6.18e-05	4.43e-12	0.0628	0.493	0.511	1.63e-12	6.37e-12	3.15e-12	0.017	0.197	0.191	0.000597	1.87e-10	1.87e-05	0.00134	0.000141	1.37e-11	0.088	0.585	0.568	6.74e-12	2.09e-11	1.2e-11	0.0264	0.302	0.235	FALSE	TRUE	FALSE
P01023	A2M	-0.233	-3.55	-0.843	-0.401	-0.659	-3.31	-0.61	-0.168	-0.426	2.71	3.15	2.89	0.442	0.183	-0.258	0.000966	2.06e-17	1.33e-09	6.5e-06	2.5e-08	4.87e-17	6.26e-08	0.00918	3.43e-06	6.38e-16	9.4e-17	2.78e-16	2.33e-06	0.00533	0.000422	0.00245	1.72e-16	6.63e-09	1.96e-05	1.12e-07	4.74e-16	2.76e-07	0.0186	1.02e-05	5.77e-15	8.95e-16	2.64e-15	7.57e-06	0.0159	0.000856	FALSE	TRUE	FALSE
P01036	CST4	-1.78	1.3	-0.0971	-0.14	-0.963	3.07	1.68	1.64	0.815	-1.39	-1.44	-2.26	-0.0428	-0.866	-0.823	6.39e-11	3.01e-09	0.301	0.145	1.01e-07	6.86e-14	1.28e-10	1.75e-10	6.67e-07	1.26e-09	8.73e-10	3.26e-12	0.642	3.39e-07	5.99e-07	1.91e-09	5.49e-09	0.347	0.185	4e-07	2.97e-13	1.06e-09	2.53e-09	2.29e-06	3.32e-09	2.06e-09	1.24e-11	0.685	4.99e-06	2.17e-06	TRUE	TRUE	FALSE
P01040	CSTA	-0.763	1.79	1.17	0.863	0.872	2.55	1.94	1.63	1.64	-0.617	-0.929	-0.919	-0.312	-0.302	0.00966	1.08e-08	3.01e-13	5.78e-11	2.51e-09	2.2e-09	3.43e-15	1.12e-13	1.01e-12	9.4e-13	1.32e-07	1.03e-09	1.17e-09	0.000157	0.000208	0.872	1.31e-07	9.58e-13	3.97e-10	1.67e-08	1.22e-08	2.04e-14	2.16e-12	3.3e-11	1.35e-11	2.67e-07	2.39e-09	3.06e-09	0.000361	0.00107	0.891	FALSE	TRUE	TRUE
P01111	NRAS	-0.972	-2.8	-2.79	-1.4	-2.33	-1.83	-1.81	-0.429	-1.36	0.0175	1.4	0.469	1.39	0.452	-0.933	0.00806	6.74e-07	7.22e-07	0.000607	4.91e-06	5.64e-05	6.18e-05	0.19	0.000761	0.956	0.000603	0.155	0.000667	0.169	0.0102	0.0159	9.66e-07	2.05e-06	0.00123	1.36e-05	7.27e-05	0.000145	0.262	0.00149	0.959	0.000739	0.168	0.00137	0.267	0.0161	FALSE	TRUE	TRUE
P01116	KRAS	NA	NA	NA	NA	NA	NA	NA	NA	NA	-0.499	1.7	-0.165	2.2	0.334	-1.86	NA	NA	NA	NA	NA	NA	NA	NA	NA	2.65e-05	9.7e-10	0.0274	1.05e-10	0.000507	4.36e-10	NA	NA	NA	NA	NA	NA	NA	NA	NA	4.06e-05	2.26e-09	0.0315	1.11e-09	0.00222	3.51e-09	FALSE	FALSE	FALSE
P01130	LDLR	NA	NA	NA	NA	NA	-3.65	-1.7	-0.173	-1.43	1.94	3.47	2.21	1.53	0.273	-1.26	NA	NA	NA	NA	NA	2.39e-11	3.9e-09	0.016	1.25e-08	1.61e-10	3.32e-11	6.65e-11	7.97e-09	6.57e-05	2.95e-08	NA	NA	NA	NA	NA	6.66e-11	2.21e-08	0.0306	6.21e-08	4.83e-10	9.83e-11	2.07e-10	4.57e-08	0.000404	1.44e-07	FALSE	FALSE	FALSE
P01833	PIGR	-2.17	NA	-0.327	-0.914	-0.772	NA	1.84	1.26	1.4	NA	NA	NA	-0.587	-0.445	0.142	2.04e-06	NA	0.271	0.00131	0.00371	NA	0.000111	0.000146	6.57e-05	NA	NA	NA	0.0649	0.145	0.489	1.11e-05	NA	0.316	0.00252	0.00636	NA	0.000251	0.00045	0.000155	NA	NA	NA	0.0895	0.236	0.542	TRUE	FALSE	FALSE
P01876	IGHA1	-2.16	0.539	0.037	-1.32	-0.0864	2.7	2.19	0.838	2.07	-0.502	-1.86	-0.626	-1.36	-0.123	1.23	3.63e-16	1.1e-08	0.391	1.79e-13	0.0594	2.15e-17	2.93e-16	5.22e-11	6.09e-16	2.54e-08	2.39e-15	1.85e-09	1.27e-13	0.0113	4.19e-13	2.07e-13	1.89e-08	0.442	4.83e-12	0.0814	2.34e-16	1.23e-14	9.33e-10	2.33e-14	5.58e-08	1.55e-14	4.7e-09	3.89e-12	0.0301	9.76e-12	TRUE	FALSE	FALSE
P02452	COL1A1	-0.0983	-2.89	-2.33	-0.72	-2.2	-2.79	-2.23	-0.621	-2.1	0.56	2.17	0.692	1.61	0.131	-1.48	0.314	2.51e-13	3.74e-12	4e-06	7.72e-12	3.88e-13	6.41e-12	1.83e-05	1.36e-11	5.05e-05	9.06e-12	6.09e-06	3.63e-10	0.185	1.03e-09	0.389	8.14e-13	3.38e-11	1.26e-05	7.55e-11	1.44e-12	7.68e-11	6.88e-05	1.48e-10	7.45e-05	2.9e-11	1e-05	3.15e-09	0.288	7.37e-09	FALSE	TRUE	TRUE
P02458	COL2A1	NA	NA	NA	NA	NA	-2.78	-2.76	NA	-2.51	0.0165	NA	0.267	NA	0.25	NA	NA	NA	NA	NA	NA	1.16e-08	1.22e-08	NA	2.51e-08	0.873	NA	0.0289	NA	0.0372	NA	NA	NA	NA	NA	NA	2.19e-08	6.28e-08	NA	1.16e-07	0.88	NA	0.0332	NA	0.0803	NA	FALSE	FALSE	FALSE
P02461	COL3A1	-0.579	-2.4	-2.22	-0.983	-1.91	-1.82	-1.64	-0.404	-1.33	0.174	1.41	0.484	1.24	0.31	-0.93	0.000323	4.87e-11	1.23e-10	1.78e-06	7.76e-10	1.44e-09	4.83e-09	0.00484	5.7e-08	0.167	2.89e-08	0.00136	1.33e-07	0.0219	3.24e-06	0.000937	1.12e-10	7.6e-10	5.96e-06	4.77e-09	3.06e-09	2.69e-08	0.0105	2.43e-07	0.18	5.55e-08	0.00174	5.73e-07	0.0519	1.01e-05	FALSE	TRUE	TRUE
P02462	COL4A1	NA	NA	NA	NA	NA	-4.84	-3.19	-1.4	-2.99	1.65	3.43	1.85	1.78	0.2	-1.58	NA	NA	NA	NA	NA	1.93e-10	4.75e-09	3.6e-06	7.8e-09	5.08e-08	4.4e-10	2.13e-08	6.57e-08	0.0381	1.62e-07	NA	NA	NA	NA	NA	4.68e-10	2.66e-08	1.58e-05	4.04e-08	1.08e-07	1.08e-09	4.64e-08	3.02e-07	0.0818	6.73e-07	FALSE	FALSE	FALSE
P02511	CRYAB	-0.0475	-0.841	0.29	0.119	0.296	-0.794	0.337	0.166	0.344	1.13	0.96	1.14	-0.171	0.00644	0.178	0.383	8.44e-10	0.000107	0.0419	8.76e-05	1.71e-09	2.52e-05	0.00764	2.09e-05	2.22e-11	1.68e-10	2.06e-11	0.00642	0.904	0.00509	0.461	1.65e-09	0.000218	0.0602	0.000194	3.6e-09	6.34e-05	0.0157	5.37e-05	7.61e-11	4.36e-10	6.91e-11	0.0108	0.933	0.00845	FALSE	FALSE	FALSE
P02533	KRT14	-0.582	-0.149	0.206	0.366	0.704	0.433	0.788	0.948	1.29	0.355	0.515	0.853	0.16	0.498	0.338	3.71e-15	7.25e-08	1.53e-09	1.29e-12	3.36e-16	1.53e-13	8e-17	7.74e-18	1.61e-19	1.87e-12	1.76e-14	2.96e-17	3.24e-08	2.68e-14	3.41e-12	9.08e-13	1.15e-07	7.49e-09	2.54e-11	1.06e-14	6.09e-13	3.96e-15	4.71e-15	2.69e-17	7.6e-12	9.27e-14	3.69e-16	1.58e-07	1.76e-11	5.83e-11	FALSE	FALSE	FALSE
P02538	KRT6A	-1.4	-0.573	-0.257	-0.043	0.343	0.825	1.14	1.36	1.74	0.315	0.53	0.915	0.214	0.6	0.386	1.44e-17	1.13e-12	2.03e-08	0.0612	6.46e-10	1.13e-14	1.89e-16	2.14e-17	8.92e-19	1.77e-09	2.99e-12	3.08e-15	1.7e-07	6.28e-13	1.52e-10	2.47e-14	3.22e-12	7.78e-08	0.0847	4.08e-09	5.79e-14	8.89e-15	9.79e-15	9.37e-17	4.57e-09	1.04e-11	2.19e-14	7.14e-07	1.46e-10	1.45e-09	TRUE	FALSE	FALSE
P02545	LMNA	-0.401	-4.03	-0.569	-0.33	-0.298	-3.63	-0.167	0.0713	0.103	3.47	3.7	3.74	0.239	0.27	0.0316	1.34e-11	2.78e-24	1.71e-13	1.5e-10	5.14e-10	1.05e-23	4.67e-07	0.00163	7.35e-05	1.92e-23	8.23e-24	7.39e-24	7.62e-09	1.71e-09	0.101	5.66e-10	1.34e-21	2.3e-12	1.46e-09	3.33e-09	5.54e-21	1.68e-06	0.004	0.000172	1.54e-20	7.31e-21	8.01e-21	4.42e-08	7.6e-08	0.132	FALSE	TRUE	FALSE
P02662	CSN1S1	-1.52	NA	-1.26	-1.16	-3.62	NA	0.256	0.36	-2.1	NA	NA	NA	0.104	-2.36	-2.47	4.89e-12	NA	3.48e-11	8.65e-11	4.53e-16	NA	0.000213	1.1e-05	1.49e-13	NA	NA	NA	0.0484	4.38e-14	2.76e-14	2.43e-10	NA	2.5e-10	9.15e-10	1.36e-14	NA	0.000458	4.37e-05	2.69e-12	NA	NA	NA	0.069	2.17e-11	9.61e-13	TRUE	FALSE	TRUE
P02663	CSN1S2	-1.16	2.96	-0.915	-0.618	-3.27	4.12	0.247	0.543	-2.11	-3.87	-3.57	-6.22	0.297	-2.35	-2.65	5.67e-10	4.96e-15	1.01e-08	9.18e-07	1.4e-15	7.48e-17	0.00395	3.71e-06	3.55e-13	1.64e-16	4.5e-16	3.97e-19	0.00105	8.81e-14	1.97e-14	1.14e-08	2.24e-14	4.12e-08	3.27e-06	3.71e-14	6.89e-16	0.00699	1.62e-05	5.8e-12	1.76e-15	3.6e-15	1.15e-17	0.00205	2.94e-11	7.13e-13	TRUE	TRUE	FALSE
P02666	CSN2	-0.923	2.38	-0.857	-0.959	-3.07	3.31	0.0661	-0.0362	-2.15	-3.24	-3.34	-5.46	-0.102	-2.22	-2.11	1.73e-10	1.2e-15	4.31e-10	1.08e-10	4.84e-17	1.9e-17	0.215	0.488	4.45e-15	2.46e-17	1.66e-17	3.3e-20	0.065	3.04e-15	5.52e-15	4.61e-09	6.33e-15	2.35e-09	1.11e-09	1.98e-15	2.1e-16	0.267	0.579	1.32e-13	3.47e-16	1.95e-16	1.62e-18	0.0896	4e-12	2.52e-13	FALSE	TRUE	FALSE
P02751	FN1	-0.483	-2.17	-0.981	-0.0806	-0.828	-1.69	-0.498	0.402	-0.345	1.19	2.09	1.34	0.9	0.153	-0.747	2.27e-13	1.24e-21	2.94e-17	0.000189	2.53e-16	3.06e-20	1.54e-13	2.24e-12	1.53e-11	2.61e-18	2.01e-21	5.59e-19	8.72e-17	2.58e-07	9.25e-16	2.16e-11	8.11e-20	1.29e-15	0.000427	8.18e-15	1.22e-18	2.85e-12	6.54e-11	1.62e-10	5.94e-17	1.88e-19	1.51e-17	1.14e-14	3.93e-06	5.95e-14	FALSE	TRUE	FALSE
P02765	AHSG	NA	NA	NA	NA	NA	NA	NA	NA	NA	5.38	NA	NA	NA	NA	NA	NA	NA	NA	NA	NA	NA	NA	NA	NA	6e-07	NA	NA	NA	NA	NA	NA	NA	NA	NA	NA	NA	NA	NA	NA	1.12e-06	NA	NA	NA	NA	NA	FALSE	FALSE	FALSE
P02766	TTR	0.135	NA	1.61	0.879	0.771	NA	1.47	0.743	0.636	NA	NA	NA	-0.728	-0.836	-0.107	0.691	NA	0.00054	0.0227	0.0402	NA	0.00104	0.0466	0.0812	NA	NA	NA	0.0504	0.0286	0.752	0.754	NA	0.000991	0.0344	0.0571	NA	0.002	0.0785	0.11	NA	NA	NA	0.0715	0.0648	0.787	FALSE	FALSE	TRUE
P02768	ALB	-1.86	0.384	-0.206	-0.518	-0.205	2.24	1.65	1.34	1.65	-0.589	-0.901	-0.589	-0.312	0.000837	0.313	3.6e-16	1e-07	7.47e-05	2.93e-09	7.77e-05	3.33e-17	1.59e-15	2.24e-14	1.58e-15	6.08e-10	3.2e-12	6.19e-10	1.04e-06	0.982	1.01e-06	2.07e-13	1.57e-07	0.000155	1.91e-08	0.000174	3.36e-16	5.56e-14	1.35e-12	5.48e-14	1.68e-09	1.1e-11	1.69e-09	3.67e-06	0.987	3.47e-06	TRUE	FALSE	FALSE
P02769	ALB.1	-1.26	2.12	-0.406	0.262	0.0795	3.39	0.858	1.53	1.34	-2.53	-1.86	-2.04	0.668	0.486	-0.182	1.01e-19	1.41e-22	1.75e-13	4.22e-11	3.53e-05	3.7e-25	1.39e-17	9.24e-21	4.65e-20	1.52e-23	7.52e-22	2.29e-22	3.28e-16	1.84e-14	3.5e-09	3.46e-16	1.65e-20	2.34e-12	5.07e-10	8.42e-05	1.36e-21	8.86e-16	3.38e-17	1.07e-17	1.54e-20	9.15e-20	4.04e-20	2.61e-14	1.46e-11	2.19e-08	TRUE	TRUE	FALSE
P02786	TFRC	-0.413	-4.43	-4.22	-1.97	-3.67	-4.02	-3.8	-1.56	-3.25	0.217	2.46	0.767	2.25	0.549	-1.7	0.0286	1.66e-12	3.1e-12	3.29e-08	1.76e-11	5.61e-12	1.12e-11	4.88e-07	7.74e-11	0.217	2.32e-09	0.000543	7.03e-09	0.00609	1.87e-07	0.049	4.64e-12	2.89e-11	1.61e-07	1.56e-10	1.7e-11	1.25e-10	2.66e-06	6.53e-10	0.233	5.12e-09	0.000726	4.11e-08	0.0177	7.65e-07	FALSE	TRUE	TRUE
P02787	TF	-0.864	3.06	0.528	-1.06	-0.00921	3.92	1.39	-0.197	0.854	-2.53	-4.12	-3.07	-1.59	-0.538	1.05	6.88e-07	1.57e-13	0.000106	6.64e-08	0.925	6.83e-15	2.66e-09	0.0604	7.75e-07	1.69e-12	3.68e-15	1.51e-13	5.33e-10	9.03e-05	7.35e-08	4.44e-06	5.21e-13	0.000216	3e-07	0.938	3.66e-14	1.61e-08	0.0983	2.62e-06	6.95e-12	2.25e-14	7.32e-13	4.33e-09	0.000522	3.27e-07	FALSE	TRUE	FALSE
P02788	LTF	-2.02	-0.444	-2.22	-0.248	-0.6	1.57	-0.202	1.77	1.42	-1.77	0.196	-0.156	1.97	1.62	-0.352	8.33e-13	3.74e-05	2.52e-13	0.00446	1.68e-06	1.85e-11	0.0154	4.31e-12	6.74e-11	4.14e-12	0.0178	0.0504	1.12e-12	1.3e-11	0.000321	5.95e-11	4.72e-05	3.26e-12	0.0078	5.07e-06	5.22e-11	0.0243	1.15e-10	5.79e-10	1.6e-11	0.0199	0.0568	2.23e-11	1.97e-09	0.000666	TRUE	FALSE	TRUE
P02810	PRH1	-3.4	NA	0.114	-0.612	-0.913	NA	3.51	2.79	2.49	NA	NA	NA	-0.726	-1.03	-0.301	6.33e-07	NA	0.636	0.0379	0.00451	NA	3.61e-08	4.81e-07	4.91e-07	NA	NA	NA	0.00439	0.000273	0.139	4.12e-06	NA	0.679	0.055	0.00759	NA	1.66e-07	2.62e-06	1.73e-06	NA	NA	NA	0.00762	0.00131	0.176	TRUE	FALSE	FALSE
P04040	CAT	3.73	5.22	4.22	4.27	4.75	1.49	0.491	0.54	1.02	-0.998	-0.95	-0.473	0.0486	0.526	0.477	3.57e-05	1.08e-06	1.03e-05	9.17e-06	3.01e-06	0.0283	0.429	0.387	0.115	0.122	0.139	0.447	0.937	0.399	0.442	0.000137	1.51e-06	2.46e-05	2.68e-05	8.65e-06	0.0308	0.492	0.477	0.151	0.133	0.148	0.465	0.948	0.516	0.496	TRUE	TRUE	TRUE
P04049	RAF1	-0.0758	-0.988	0.348	0.436	0.0335	-0.912	0.424	0.512	0.109	1.34	1.42	1.02	0.088	-0.315	-0.403	0.318	6.3e-09	0.000387	5.05e-05	0.653	1.63e-08	6.61e-05	1.03e-05	0.158	1.62e-10	7.39e-11	4.23e-09	0.25	0.000886	0.000107	0.393	1.11e-08	0.000726	0.000126	0.7	2.99e-08	0.000154	4.12e-05	0.201	4.85e-10	2.05e-10	1.02e-08	0.3	0.00353	0.000244	FALSE	FALSE	FALSE
P04062	GBA	-0.351	-2.59	-1.92	-0.893	-1.66	-2.24	-1.57	-0.542	-1.31	0.669	1.7	0.934	1.03	0.265	-0.765	0.00133	3.24e-13	1.35e-11	1.39e-07	8.45e-11	2.01e-12	1.64e-10	2.98e-05	1.55e-09	3.42e-06	6.28e-11	8.34e-08	2.68e-08	0.00898	8.01e-07	0.00326	1.02e-12	1.09e-10	5.91e-07	6.51e-10	6.58e-12	1.33e-09	0.000106	9.41e-09	5.82e-06	1.76e-10	1.72e-07	1.32e-07	0.0248	2.83e-06	FALSE	TRUE	TRUE
P04080	CSTB	NA	NA	NA	NA	NA	NA	4.2	NA	0.114	NA	NA	NA	NA	-4.09	NA	NA	NA	NA	NA	NA	NA	2.29e-05	NA	0.553	NA	NA	NA	NA	2.6e-05	NA	NA	NA	NA	NA	NA	NA	5.81e-05	NA	0.61	NA	NA	NA	NA	0.000188	NA	FALSE	FALSE	FALSE
P04083	ANXA1	-0.302	-4.73	-0.944	-0.345	-0.407	-4.43	-0.643	-0.0436	-0.105	3.78	4.38	4.32	0.599	0.538	-0.0614	0.00119	1.97e-17	1.03e-08	0.000401	9.39e-05	4.55e-17	8.64e-07	0.559	0.173	3.31e-16	5.15e-17	6.16e-17	1.87e-06	5.91e-06	0.413	0.00293	1.66e-16	4.2e-08	0.00085	0.000208	4.45e-16	2.95e-06	0.645	0.217	3.24e-15	5.31e-16	7.1e-16	6.22e-06	5.53e-05	0.467	FALSE	TRUE	FALSE
P04114	APOB	-1.37	-2.57	-1.49	-1.06	-1.53	-1.2	-0.123	0.312	-0.165	1.08	1.51	1.03	0.435	-0.0427	-0.477	0.0672	0.00271	0.0488	0.146	0.0436	0.0721	0.843	0.617	0.79	0.102	0.0288	0.115	0.488	0.945	0.447	0.104	0.00306	0.0652	0.187	0.0616	0.0767	0.871	0.697	0.819	0.112	0.0317	0.126	0.543	0.962	0.501	FALSE	TRUE	FALSE
P04150	NR3C1	-0.0574	-0.917	-0.101	0.535	-0.242	-0.86	-0.0432	0.592	-0.184	0.817	1.45	0.676	0.636	-0.141	-0.777	0.647	8.11e-06	0.426	0.00212	0.0714	1.52e-05	0.73	0.00101	0.157	2.49e-05	2.25e-07	0.00014	0.000587	0.27	0.00011	0.713	1.07e-05	0.477	0.00393	0.0963	2.05e-05	0.775	0.0026	0.199	3.82e-05	3.87e-07	0.000198	0.00121	0.385	0.000249	FALSE	FALSE	FALSE
P04156	PRNP	NA	NA	NA	NA	NA	-1.71	-1.52	0.0495	-1.24	0.183	1.76	0.471	1.57	0.287	-1.29	NA	NA	NA	NA	NA	0.0146	0.0251	0.933	0.0583	0.73	0.00695	0.383	0.0126	0.59	0.0324	NA	NA	NA	NA	NA	0.0162	0.0383	0.951	0.0816	0.743	0.00794	0.402	0.0201	0.689	0.0468	FALSE	FALSE	FALSE
P04181	OAT	0.726	-0.454	0.382	-0.124	0.0537	-1.18	-0.345	-0.851	-0.673	0.835	0.329	0.507	-0.506	-0.328	0.178	0.00265	0.0211	0.0426	0.537	0.742	1.6e-05	0.025	0.00104	0.000721	8.28e-05	0.0708	0.00202	0.0129	0.0192	0.292	0.00601	0.0228	0.0572	0.595	0.779	2.15e-05	0.0381	0.00266	0.00142	0.000119	0.0764	0.00255	0.0205	0.0467	0.342	FALSE	FALSE	FALSE
P04183	TK1	-0.645	-1.38	-0.934	-0.771	-1.02	-0.74	-0.289	-0.126	-0.378	0.451	0.614	0.362	0.163	-0.0887	-0.252	0.0601	0.000503	0.012	0.0298	0.00384	0.0355	0.405	0.712	0.242	0.169	0.0713	0.212	0.634	0.776	0.426	0.0941	0.000588	0.0177	0.0441	0.00656	0.0385	0.467	0.778	0.294	0.183	0.077	0.228	0.678	0.842	0.479	FALSE	TRUE	FALSE
P04259	KRT6B	-1.52	-1.87	-0.218	-0.232	0.75	-0.357	1.3	1.28	2.27	1.66	1.64	2.62	-0.0149	0.968	0.983	4.33e-12	3.08e-13	0.00389	0.00246	2.3e-08	7.1e-05	2.96e-11	3.42e-11	2.79e-14	1.45e-12	1.62e-12	4.42e-15	0.813	1.1e-09	9.1e-10	2.21e-10	9.75e-13	0.00618	0.00451	1.04e-07	9.1e-05	2.95e-10	6.45e-10	6.42e-13	6.06e-12	5.82e-12	3.02e-14	0.842	5.48e-08	6.69e-09	TRUE	TRUE	FALSE
P04406	GAPDH	-0.424	-4.66	-0.259	-0.18	0.463	-4.24	0.166	0.244	0.887	4.4	4.48	5.13	0.0788	0.722	0.643	1.27e-07	1.41e-20	2.63e-05	0.000696	4.69e-08	4.74e-20	0.00133	4.6e-05	1.77e-11	2.91e-20	2.32e-20	4.24e-21	0.074	2.27e-10	9.31e-10	1.02e-06	4.39e-19	5.86e-05	0.0014	1.99e-07	1.69e-18	0.00254	0.000159	1.84e-10	1.82e-18	1.16e-18	3.36e-19	0.101	1.69e-08	6.83e-09	FALSE	TRUE	FALSE
P04424	ASL	0.575	-2.04	-0.465	-0.717	-0.322	-2.62	-1.04	-1.29	-0.897	1.58	1.33	1.72	-0.251	0.143	0.394	0.415	0.0162	0.506	0.342	0.704	0.000614	0.0597	0.041	0.217	0.0107	0.0371	0.0336	0.647	0.836	0.593	0.492	0.0176	0.555	0.399	0.746	0.000736	0.084	0.0702	0.268	0.0128	0.0407	0.0384	0.689	0.884	0.641	FALSE	FALSE	FALSE
P04632	CAPNS1	-0.635	-3.15	-0.0785	0.841	-0.11	-2.51	0.556	1.48	0.524	3.07	3.99	3.04	0.919	-0.032	-0.951	4.27e-08	1.03e-16	0.179	1.5e-09	0.0668	1.78e-15	1.96e-07	1.45e-12	3.83e-07	1.42e-16	5.11e-18	1.62e-16	5.06e-10	0.572	3.33e-10	4.1e-07	7.15e-16	0.218	1.06e-08	0.0907	1.13e-14	7.59e-07	4.57e-11	1.38e-06	1.55e-15	7.33e-17	1.68e-15	4.15e-09	0.674	2.8e-09	FALSE	TRUE	FALSE
P04745	AMY1A	-3.21	0.0961	-1.37	-1.77	-1.68	3.31	1.84	1.44	1.53	-1.47	-1.86	-1.77	-0.394	-0.302	0.0912	3.72e-09	0.679	4.44e-05	3.42e-06	5.98e-06	2.61e-09	2.28e-06	2.77e-05	1.5e-05	2.29e-05	1.93e-06	3.32e-06	0.107	0.206	0.694	5.51e-08	0.687	9.59e-05	1.08e-05	1.63e-05	5.38e-09	7.06e-06	9.95e-05	3.96e-05	3.52e-05	3e-06	5.65e-06	0.141	0.312	0.733	TRUE	FALSE	TRUE
P04792	HSPB1	-0.495	-2.77	-0.126	-0.011	0.314	-2.27	0.369	0.484	0.81	2.64	2.75	3.08	0.115	0.44	0.325	1.4e-05	1.78e-14	0.107	0.882	0.000871	2.13e-13	0.000228	1.76e-05	6.38e-08	3.2e-14	1.87e-14	4.56e-15	0.138	4.48e-05	0.000662	6.02e-05	7.05e-14	0.136	0.903	0.00167	8.29e-13	0.000488	6.65e-05	2.67e-07	1.87e-13	9.77e-14	3.08e-14	0.178	0.000295	0.0013	FALSE	TRUE	FALSE
P04818	TYMS	NA	NA	NA	NA	NA	-5.16	NA	NA	NA	NA	NA	NA	NA	NA	NA	NA	NA	NA	NA	NA	6.71e-07	NA	NA	NA	NA	NA	NA	NA	NA	NA	NA	NA	NA	NA	NA	1.04e-06	NA	NA	NA	NA	NA	NA	NA	NA	NA	FALSE	FALSE	FALSE
P04843	RPN1	-0.423	-3.45	-4.78	-2.56	-4.44	-3.03	-4.36	-2.14	-4.02	-1.33	0.888	-0.993	2.22	0.339	-1.88	8.25e-07	5.09e-18	8.09e-20	2.21e-16	2.06e-19	2.68e-17	2.62e-19	2.17e-15	7.32e-19	8.5e-13	1.31e-10	3.29e-11	1.36e-15	8.99e-06	1.1e-14	5.16e-06	5.14e-17	8.68e-18	2.17e-14	2.13e-17	2.83e-16	3.35e-17	2.56e-13	8.03e-17	3.73e-12	3.47e-10	1.08e-10	7.44e-14	7.71e-05	4.36e-13	FALSE	TRUE	TRUE
P04844	RPN2	-0.0162	-3.85	-5.03	-2.75	-4.65	-3.84	-5.02	-2.73	-4.63	-1.18	1.1	-0.798	2.28	0.384	-1.9	0.873	7.36e-13	4.24e-14	2.63e-11	9.89e-14	1.91e-14	1.08e-15	7.08e-13	2.53e-15	4.84e-09	1e-08	2.65e-07	4.77e-12	0.000216	3.36e-11	0.902	2.18e-12	6.71e-13	3.43e-10	1.57e-12	9.31e-14	3.89e-14	2.47e-11	8.18e-14	1.18e-08	2.03e-08	5.12e-07	7.83e-11	0.0011	4e-10	FALSE	TRUE	TRUE
P04899	GNAI2	-0.41	-4.42	-3.73	-1.95	-3.38	-4.01	-3.32	-1.54	-2.97	0.686	2.47	1.04	1.78	0.352	-1.43	0.13	3.02e-10	2.35e-09	4.06e-06	7.71e-09	9.92e-10	9.49e-09	4.5e-05	3.56e-08	0.0184	2.94e-07	0.00133	1e-05	0.189	8.64e-05	0.184	6.21e-10	1.11e-08	1.27e-05	3.82e-08	2.16e-09	4.96e-08	0.000156	1.58e-07	0.0215	4.98e-07	0.00171	2.85e-05	0.293	0.0002	FALSE	TRUE	TRUE
P04908	HIST1H2AB	-0.337	1.22	0.0751	0.0874	-0.349	1.56	0.412	0.424	-0.0117	-1.14	-1.13	-1.57	0.0123	-0.424	-0.436	0.25	0.000822	0.793	0.76	0.235	0.0001	0.165	0.154	0.967	0.00135	0.00146	9.37e-05	0.966	0.154	0.144	0.321	0.000948	0.823	0.8	0.284	0.000127	0.211	0.22	0.971	0.00173	0.00175	0.000136	0.972	0.248	0.181	FALSE	TRUE	FALSE
P05023	ATP1A1	-0.233	-3.55	-3.63	-1.82	-3.15	-3.32	-3.4	-1.59	-2.92	-0.0771	1.73	0.404	1.81	0.481	-1.33	4.89e-05	2.63e-19	2e-19	1.26e-15	1.22e-18	6.21e-19	4.64e-19	7.1e-15	3.23e-18	0.0691	2.36e-15	1.38e-07	1.36e-15	1.8e-08	6.76e-14	0.000181	4.37e-18	1.91e-17	8.64e-14	8.51e-17	1.2e-17	5.37e-17	6.11e-13	2.76e-16	0.0771	1.53e-14	2.76e-07	7.44e-14	4.51e-07	2.05e-12	FALSE	TRUE	TRUE
P05067	APP	0.506	-0.873	-0.975	0.203	-0.788	-1.38	-1.48	-0.303	-1.29	-0.101	1.08	0.085	1.18	0.186	-0.991	0.000128	4.7e-07	1.35e-07	0.0495	1.46e-06	2.25e-09	9.56e-10	0.00661	4.84e-09	0.299	4.29e-08	0.38	1.49e-08	0.0681	1.12e-07	0.000417	6.85e-07	4.39e-07	0.0698	4.5e-06	4.68e-09	6.52e-09	0.0139	2.61e-08	0.317	8.06e-08	0.399	7.87e-08	0.13	4.72e-07	FALSE	FALSE	FALSE
P05089	ARG1	-0.128	0.505	0.359	0.688	1	0.633	0.488	0.816	1.13	-0.146	0.183	0.497	0.329	0.642	0.314	0.00665	1.32e-08	6.66e-07	3.15e-10	3.03e-12	8.69e-10	1.99e-08	3.84e-11	6.69e-13	0.00293	0.000507	1.59e-08	1.76e-06	7.28e-10	2.94e-06	0.0135	2.25e-08	1.9e-06	2.81e-09	3.23e-11	1.91e-09	9.69e-08	7.16e-10	1.01e-11	0.00365	0.000626	3.54e-08	5.92e-06	4.06e-08	9.26e-06	FALSE	FALSE	FALSE
P05091	ALDH2	-1.07	-2.98	-1.77	-0.713	-2.22	-1.91	-0.701	0.357	-1.15	1.21	2.27	0.756	1.06	-0.452	-1.51	0.000195	3.06e-09	1.25e-06	0.00451	9.68e-08	5.46e-07	0.00502	0.109	9.87e-05	6.39e-05	7.75e-08	0.00304	0.000215	0.0484	6.88e-06	0.000606	5.56e-09	3.43e-06	0.00788	3.85e-07	8.51e-07	0.00871	0.163	0.000228	9.32e-05	1.4e-07	0.00377	0.000478	0.0994	1.98e-05	TRUE	TRUE	TRUE
P05106	ITGB3	NA	-4.07	-3.05	NA	-2.62	NA	NA	NA	NA	1.02	NA	1.46	NA	0.43	NA	NA	3.81e-06	2.46e-05	NA	6.42e-05	NA	NA	NA	NA	0.00207	NA	0.000281	NA	0.0826	NA	NA	5.14e-06	5.53e-05	NA	0.000146	NA	NA	NA	NA	0.00262	NA	0.000385	NA	0.152	NA	FALSE	TRUE	TRUE
P05109	S100A8	-0.329	1.34	0.688	0.623	0.668	1.67	1.02	0.952	0.996	-0.657	-0.722	-0.677	-0.0654	-0.0205	0.045	6.81e-05	6.69e-12	2.34e-08	7.52e-08	3.34e-08	4.34e-13	2.12e-10	4.78e-10	2.72e-10	4.05e-08	1.33e-08	2.83e-08	0.27	0.724	0.443	0.000239	1.72e-11	8.85e-08	3.35e-07	1.47e-07	1.6e-12	1.69e-09	6.03e-09	2.01e-09	8.69e-08	2.64e-08	6.11e-08	0.322	0.801	0.497	FALSE	TRUE	FALSE
P05120	SERPINB2	-0.316	-2.63	NA	-0.365	-0.0936	-2.31	NA	-0.0485	0.223	NA	2.26	2.54	NA	NA	0.271	0.339	7.51e-05	NA	0.302	0.783	1.89e-05	NA	0.848	0.391	NA	4.39e-05	2.15e-05	NA	NA	0.344	0.416	9.23e-05	NA	0.358	0.817	2.54e-05	NA	0.885	0.452	NA	5.93e-05	3.33e-05	NA	NA	0.396	FALSE	TRUE	FALSE
P05141	SLC25A5	0.209	-2.8	-3.74	-1.67	-3.41	-3.01	-3.95	-1.88	-3.62	-0.941	1.12	-0.614	2.06	0.326	-1.74	5.37e-05	1.56e-18	3.94e-20	1.04e-15	1.26e-19	6.26e-19	1.97e-20	2.36e-16	5.91e-20	1.49e-12	1.61e-13	2.93e-10	7.41e-17	5.12e-07	6.55e-16	0.000195	1.88e-17	4.91e-18	7.96e-14	1.49e-17	1.2e-17	4.82e-18	5.07e-14	1.14e-17	6.23e-12	6.94e-13	8.35e-10	1.01e-14	6.94e-06	4.52e-14	FALSE	TRUE	TRUE
P05164	MPO	NA	NA	NA	NA	NA	NA	NA	NA	NA	-2.69	NA	1.1	NA	3.79	NA	NA	NA	NA	NA	NA	NA	NA	NA	NA	1.19e-07	NA	4.15e-05	NA	1.22e-08	NA	NA	NA	NA	NA	NA	NA	NA	NA	NA	2.43e-07	NA	6.23e-05	NA	3.42e-07	NA	FALSE	FALSE	FALSE
P05204	HMGN2	-1.53	-2.62	-1.88	-1.63	-1.14	-1.09	-0.352	-0.101	0.385	0.742	0.993	1.48	0.251	0.737	0.486	3.93e-08	5.76e-11	3.35e-09	1.85e-08	1.07e-06	1.7e-06	0.0193	0.456	0.0121	8.75e-05	4.8e-06	5.67e-08	0.0793	9.36e-05	0.0028	3.85e-07	1.31e-10	1.53e-08	9.64e-08	3.38e-06	2.51e-06	0.03	0.547	0.0193	0.000126	7.14e-06	1.19e-07	0.107	0.000537	0.00486	TRUE	TRUE	TRUE
P05386	RPLP1	0.348	NA	1.51	0.672	1.64	NA	1.17	0.324	1.3	NA	NA	NA	-0.841	0.132	0.973	0.363	NA	0.00491	0.0974	0.00302	NA	0.0188	0.394	0.0112	NA	NA	NA	0.0686	0.773	0.0406	0.439	NA	0.00767	0.129	0.00526	NA	0.0293	0.485	0.018	NA	NA	NA	0.0941	0.84	0.0575	FALSE	FALSE	TRUE
P05387	RPLP2	0.171	6.28	0.244	0.473	0.436	6.11	0.0737	0.303	0.266	-6.04	-5.81	-5.85	0.229	0.192	-0.0369	0.000801	2e-22	3.25e-05	2.36e-08	6.1e-08	2.84e-22	0.0821	3.63e-06	1.41e-05	3.31e-22	5.42e-22	5e-22	6.1e-05	0.000301	0.362	0.00206	2.04e-20	7.13e-05	1.19e-07	2.52e-07	4.18e-20	0.112	1.59e-05	3.74e-05	6.93e-20	6.85e-20	6.93e-20	0.00015	0.00143	0.414	FALSE	TRUE	FALSE
P05388	RPLP0	0.0965	2.28	0.297	0.515	0.261	2.18	0.201	0.419	0.164	-1.98	-1.76	-2.02	0.218	-0.0365	-0.255	0.0767	1.84e-15	5.44e-05	1.57e-07	0.000183	3.17e-15	0.00156	1.6e-06	0.00617	1.07e-14	4.67e-14	8.52e-15	0.000816	0.479	0.000223	0.117	9.13e-15	0.000116	6.61e-07	0.000388	1.9e-14	0.00295	7.59e-06	0.0103	7.11e-14	2.25e-13	5.37e-14	0.00164	0.59	0.000481	FALSE	TRUE	FALSE
P05412	JUN	-0.995	-0.37	-0.701	-1.21	-0.253	0.626	0.295	-0.215	0.742	-0.331	-0.841	0.116	-0.51	0.447	0.958	1.52e-09	8.46e-05	9.75e-08	1.39e-10	0.00198	3.53e-07	0.000612	0.00591	4.99e-08	0.000231	1.14e-08	0.0986	3.32e-06	1.32e-05	2.43e-09	2.63e-08	0.000104	3.26e-07	1.38e-09	0.00355	5.63e-07	0.00123	0.0126	2.16e-07	0.00032	2.3e-08	0.109	1.05e-05	0.000108	1.59e-08	FALSE	FALSE	FALSE
P05556	ITGB1	-0.849	-4.74	-5.14	-3.1	-4.59	-3.89	-4.29	-2.25	-3.74	-0.401	1.64	0.154	2.04	0.555	-1.49	9.29e-08	5.34e-17	1.91e-17	1.16e-14	8.12e-17	6.49e-16	1.88e-16	6.48e-13	1.08e-15	0.000224	3.3e-11	0.0728	2.18e-12	9.92e-06	1.12e-10	7.9e-07	4.06e-16	8.74e-16	4.72e-13	3.13e-15	4.56e-15	8.89e-15	2.32e-11	4.02e-14	0.000311	9.79e-11	0.0811	3.96e-11	8.44e-05	1.1e-09	FALSE	TRUE	TRUE
P05783	KRT18	0.837	NA	1.29	0.205	1.14	NA	0.452	-0.631	0.302	NA	NA	NA	-1.08	-0.15	0.933	0.00424	NA	0.0005	0.384	0.000547	NA	0.104	0.0193	0.211	NA	NA	NA	0.00168	0.565	0.00215	0.00905	NA	0.000922	0.444	0.00108	NA	0.139	0.0361	0.261	NA	NA	NA	0.00316	0.668	0.00381	FALSE	FALSE	TRUE
P05997	COL5A2	-0.287	-2.26	-2.27	-0.988	-2.06	-1.98	-1.99	-0.701	-1.77	-0.0103	1.28	0.205	1.29	0.215	-1.07	0.00609	2.19e-12	2.06e-12	5.29e-08	7.13e-12	1.18e-11	1.11e-11	2.5e-06	4.58e-11	0.908	2.54e-09	0.0361	2.31e-09	0.029	2.04e-08	0.0125	6e-12	2.04e-11	2.43e-07	7.02e-11	3.41e-11	1.24e-10	1.14e-05	4.17e-10	0.914	5.59e-09	0.0411	1.53e-08	0.0655	1.03e-07	FALSE	TRUE	TRUE
P06396	GSN	-0.193	-2.63	-1.98	-0.391	-2.17	-2.43	-1.79	-0.199	-1.97	0.649	2.24	0.46	1.59	-0.189	-1.78	2.98e-05	5.76e-19	2.11e-17	1.22e-08	6.65e-18	1.52e-18	7.75e-17	2.22e-05	2.17e-17	2.59e-11	4.47e-18	1.74e-09	3.45e-16	3.69e-05	8.32e-17	0.000117	8.04e-18	9.54e-16	6.6e-08	3.8e-16	2.42e-17	3.93e-15	8.2e-05	1.42e-15	8.79e-11	6.61e-17	4.45e-09	2.69e-14	0.00025	1.05e-14	FALSE	TRUE	TRUE
P06454	PTMA	-1.63	0.933	-0.0684	-0.0799	0.571	2.56	1.56	1.55	2.2	-1	-1.01	-0.362	-0.0115	0.639	0.651	8e-09	4.46e-06	0.587	0.527	0.000482	3.23e-11	1.33e-08	1.45e-08	2.11e-10	2.1e-06	1.85e-06	0.0115	0.927	0.000182	0.000155	1.02e-07	5.98e-06	0.632	0.585	0.00096	8.76e-11	6.78e-08	1.19e-07	1.6e-09	3.67e-06	2.88e-06	0.0136	0.939	0.000948	0.000344	TRUE	FALSE	FALSE
P06493	CDK1	-0.274	-3.52	-0.275	-0.295	-0.0731	-3.25	-0.00147	-0.021	0.201	3.25	3.23	3.45	-0.0196	0.202	0.222	3.17e-06	7.41e-20	2.99e-06	1.42e-06	0.0567	2.07e-19	0.967	0.557	7.28e-05	2.08e-19	2.25e-19	9.68e-20	0.584	6.79e-05	2.78e-05	1.63e-05	1.58e-18	7.78e-06	4.89e-06	0.0779	5.15e-18	0.974	0.643	0.00017	7.81e-18	6.01e-18	3.8e-18	0.632	0.000415	7.15e-05	FALSE	TRUE	FALSE
P06576	ATP5F1B	-0.144	-3.28	-4.29	-2.55	-3.94	-3.13	-4.15	-2.41	-3.8	-1.02	0.72	-0.667	1.74	0.349	-1.39	0.0576	1.08e-15	3.52e-17	2.48e-14	1.03e-16	1.9e-15	5.43e-17	5.16e-14	1.65e-16	2.32e-09	1.33e-07	3.22e-07	3.16e-12	0.000235	5.14e-11	0.0907	5.76e-15	1.46e-15	8.78e-13	3.72e-15	1.2e-14	2.96e-15	2.58e-12	7.24e-15	5.89e-09	2.36e-07	6.18e-07	5.51e-11	0.00117	5.68e-10	FALSE	TRUE	TRUE
P06702	S100A9	-0.222	1.47	0.744	0.597	0.783	1.69	0.967	0.819	1.01	-0.727	-0.874	-0.688	-0.147	0.0385	0.186	0.00498	1.3e-11	5.01e-08	6.2e-07	2.77e-08	2.26e-12	2.26e-09	1.63e-08	1.41e-09	6.61e-08	7.53e-09	1.24e-07	0.0429	0.567	0.0143	0.0105	3.23e-11	1.78e-07	2.29e-06	1.23e-07	7.35e-12	1.38e-08	1.31e-07	8.67e-09	1.38e-07	1.55e-08	2.5e-07	0.0618	0.669	0.022	FALSE	TRUE	FALSE
P06703	S100A6	-0.391	2.15	-0.381	-0.91	-0.283	2.54	0.00962	-0.519	0.108	-2.53	-3.06	-2.43	-0.529	0.098	0.627	0.22	9.05e-06	0.231	0.0104	0.367	1.54e-06	0.975	0.111	0.728	1.6e-06	1.93e-07	2.45e-06	0.105	0.752	0.0594	0.289	1.18e-05	0.273	0.0168	0.426	2.29e-06	0.98	0.166	0.764	2.84e-06	3.35e-07	4.24e-06	0.138	0.824	0.0817	FALSE	TRUE	FALSE
P06730	EIF4E	-0.431	-1.17	-0.714	-0.954	-0.455	-0.737	-0.283	-0.523	-0.024	0.454	0.213	0.713	-0.24	0.259	0.499	4.17e-07	2.58e-12	1.12e-09	3.17e-11	2.26e-07	7.63e-10	3.58e-05	4.53e-08	0.608	2.34e-07	0.000461	1.14e-09	0.000165	8.36e-05	7.83e-08	2.9e-06	6.97e-12	5.68e-09	3.94e-10	8.25e-07	1.69e-09	8.76e-05	3.18e-07	0.659	4.61e-07	0.000573	3e-09	0.000376	0.000495	3.45e-07	FALSE	TRUE	FALSE
P06733	ENO1	-0.427	-5.11	0.102	-0.363	1.07	-4.68	0.529	0.0634	1.49	5.21	4.75	6.18	-0.466	0.963	1.43	0.000151	2.62e-17	0.226	0.0006	8.01e-09	7.92e-17	1.94e-05	0.444	1.35e-10	2.04e-17	6.68e-17	2.37e-18	6.73e-05	2.64e-08	2.3e-10	0.000481	2.14e-16	0.268	0.00122	3.94e-08	7.25e-16	5.02e-05	0.536	1.08e-09	3e-16	6.6e-16	4.73e-17	0.000164	6.15e-07	2.04e-09	FALSE	TRUE	FALSE
P06744	GPI	-0.611	-5.96	0.119	-0.357	0.977	-5.35	0.731	0.254	1.59	6.08	5.6	6.94	-0.476	0.858	1.33	0.0152	1.13e-12	0.595	0.126	0.000652	4.39e-12	0.00537	0.265	6.97e-06	8.85e-13	2.46e-12	1.69e-13	0.0483	0.00178	4.03e-05	0.0282	3.23e-12	0.638	0.163	0.00127	1.36e-11	0.00928	0.348	1.95e-05	3.86e-12	8.62e-12	8.12e-13	0.0689	0.00639	0.0001	FALSE	TRUE	FALSE
P06746	POLB	-0.835	-3.89	-3.41	-1.96	-3.06	-3.05	-2.58	-1.12	-2.23	0.47	1.93	0.821	1.46	0.35	-1.11	0.00416	1.81e-09	7.67e-09	2.96e-06	2.54e-08	7.8e-09	4.96e-08	0.000194	2.4e-07	0.0459	1.12e-06	0.00222	1.84e-05	0.123	0.000222	0.0089	3.38e-09	3.23e-08	9.48e-06	1.14e-07	1.49e-08	2.22e-07	0.000582	9.08e-07	0.0521	1.79e-06	0.00279	4.98e-05	0.207	0.000478	FALSE	TRUE	TRUE
P06748	NPM1	-0.162	1.06	-0.00455	0.17	0.257	1.22	0.158	0.332	0.419	-1.06	-0.89	-0.803	0.174	0.261	0.0871	0.000969	8.97e-13	0.907	0.000681	1.54e-05	1.5e-13	0.00121	1.01e-06	7.24e-08	8.5e-13	7.94e-12	2.85e-11	0.000549	1.29e-05	0.04	0.00245	2.62e-12	0.92	0.00137	3.89e-05	5.97e-13	0.00232	5.08e-06	3e-07	3.73e-12	2.56e-11	9.41e-11	0.00114	0.000106	0.0568	FALSE	TRUE	FALSE
P06753	TPM3	-1.03	-2.33	-5.19	-2.54	-5.25	-1.3	-4.16	-1.51	-4.22	-2.86	-0.215	-2.93	2.64	-0.0671	-2.71	1.46e-11	5.22e-16	2e-20	1.71e-16	1.7e-20	8.29e-13	3.34e-19	1.21e-13	2.73e-19	3.84e-17	0.000492	2.86e-17	1.03e-16	0.172	7.52e-17	6.04e-10	2.96e-15	3.13e-18	1.83e-14	3.07e-18	2.91e-12	4.13e-17	5.4e-12	3.78e-17	5.11e-16	0.000609	3.63e-16	1.23e-14	0.27	9.83e-15	TRUE	TRUE	TRUE
P06756	ITGAV	1.09	-3.62	-3.61	-1.46	-3.16	-4.71	-4.7	-2.55	-4.25	0.0117	2.16	0.462	2.15	0.45	-1.7	1.26e-06	4.98e-13	5.17e-13	1.58e-08	2.42e-12	8.63e-14	8.88e-14	1.05e-10	2.86e-13	0.915	1.9e-10	0.0011	2.02e-10	0.00133	2.89e-09	7.36e-06	1.52e-12	5.99e-12	8.37e-08	2.67e-11	3.66e-13	1.75e-12	1.65e-09	4.81e-12	0.92	4.91e-10	0.00142	1.94e-09	0.00503	1.85e-08	TRUE	TRUE	TRUE
P06865	HEXA	-1.91	-4.22	-1.54	-1.72	-1.79	-2.31	0.373	0.192	0.117	2.68	2.5	2.42	-0.181	-0.256	-0.0755	5.33e-08	3.52e-12	6.35e-07	1.81e-07	1.11e-07	5.76e-09	0.0463	0.276	0.502	9.45e-10	2.2e-09	3.18e-09	0.305	0.154	0.663	4.89e-07	9.38e-12	1.82e-06	7.46e-07	4.34e-07	1.13e-08	0.0669	0.36	0.56	2.54e-09	4.89e-09	7.81e-09	0.358	0.248	0.705	TRUE	TRUE	TRUE
P07196	NEFL	-0.951	-2.6	-3.25	-1.21	-3.26	-1.65	-2.3	-0.263	-2.31	-0.646	1.39	-0.655	2.04	-0.00861	-2.04	0.000915	2.04e-07	2.59e-08	0.000236	2.52e-08	5.49e-07	2.58e-08	0.133	2.49e-08	0.00121	6.96e-06	0.00111	2.26e-07	0.953	2.17e-07	0.00233	3.08e-07	9.66e-08	0.000524	1.13e-07	8.55e-07	1.24e-07	0.194	1.15e-07	0.00157	1.02e-05	0.00143	9.24e-07	0.966	8.76e-07	FALSE	TRUE	TRUE
P07197	NEFM	0.669	-2.24	-2.02	-0.667	-2.12	-2.91	-2.69	-1.34	-2.79	0.221	1.58	0.121	1.35	-0.0997	-1.45	4.74e-05	1.2e-10	3.91e-10	4.88e-05	2.26e-10	1.64e-12	4.09e-12	1.18e-08	2.68e-12	0.04	1.85e-09	0.229	1.01e-08	0.319	4.56e-09	0.000175	2.6e-10	2.15e-09	0.000122	1.59e-09	5.44e-12	5.18e-11	9.88e-08	3.45e-11	0.0456	4.17e-09	0.245	5.65e-08	0.438	2.78e-08	FALSE	TRUE	TRUE
P07237	P4HB	-0.569	-3.76	-1.46	-0.928	-1.72	-3.19	-0.89	-0.359	-1.15	2.3	2.84	2.05	0.531	-0.257	-0.789	3.27e-11	1.43e-21	2.39e-16	7.27e-14	3.05e-17	1.15e-20	1.23e-13	9.03e-09	4.99e-15	7.27e-19	5.21e-20	3.27e-18	7.64e-11	4.24e-07	5.6e-13	1.13e-09	8.94e-20	7.19e-15	2.17e-12	1.36e-15	7.05e-19	2.31e-12	7.82e-08	1.47e-13	2.07e-17	2.05e-18	6.05e-17	8.5e-10	5.95e-06	1.25e-11	FALSE	TRUE	TRUE
P07305	H1F0	0.0192	2.51	0.225	0.191	0.192	2.5	0.206	0.172	0.173	-2.29	-2.32	-2.32	-0.0339	-0.0329	0.000993	0.636	2.84e-17	8.36e-05	0.000359	0.000343	3.13e-17	0.000189	0.000856	0.000817	9.33e-17	7.74e-17	7.78e-17	0.41	0.423	0.98	0.703	2.29e-16	0.000173	0.000765	0.000699	3.21e-16	0.000408	0.00223	0.00159	1.08e-15	7.5e-16	8.63e-16	0.465	0.539	0.984	FALSE	TRUE	FALSE
P07339	CTSD	-0.517	-0.331	1.25	1.09	1.01	0.186	1.77	1.61	1.53	1.58	1.42	1.35	-0.161	-0.238	-0.0766	2.89e-05	0.00141	1.43e-09	7.47e-09	1.77e-08	0.0411	2.05e-11	6.67e-11	1.22e-10	8.07e-11	3.01e-10	5.93e-10	0.0709	0.0124	0.366	0.000114	0.00162	7.05e-09	4.3e-08	8.16e-08	0.0444	2.14e-10	1.13e-09	9.78e-10	2.54e-10	7.56e-10	1.63e-09	0.0971	0.0323	0.418	FALSE	FALSE	TRUE
P07355	ANXA2	-0.104	-4.02	-3.07	-1.52	-2.79	-3.92	-2.97	-1.42	-2.68	0.948	2.49	1.23	1.55	0.285	-1.26	0.178	1.55e-16	4.67e-15	3.02e-11	1.6e-14	2.16e-16	7.2e-15	7.2e-11	2.57e-14	9.81e-09	6.44e-14	4.13e-10	2.55e-11	0.00183	3.13e-10	0.241	1.03e-15	9.9e-14	3.79e-10	3.14e-13	1.73e-15	1.96e-13	1.19e-09	6.02e-13	2.3e-08	3.02e-13	1.16e-09	3.26e-10	0.00654	2.67e-09	FALSE	TRUE	TRUE
P07384	CAPN1	-0.797	-3.14	0.339	-0.0845	0.417	-2.34	1.14	0.713	1.21	3.48	3.06	3.56	-0.423	0.0786	0.502	0.000273	7.06e-11	0.0551	0.607	0.0222	2.51e-09	9.31e-06	0.000696	4.63e-06	1.99e-11	9.87e-11	1.51e-11	0.0208	0.632	0.00818	0.000804	1.58e-10	0.073	0.663	0.0333	5.2e-09	2.54e-05	0.00186	1.35e-05	6.89e-11	2.67e-10	5.18e-11	0.0318	0.725	0.0131	FALSE	TRUE	FALSE
P07437	TUBB	-0.0673	-2.01	0.462	0.62	0.0206	-1.94	0.53	0.688	0.0879	2.47	2.63	2.03	0.158	-0.442	-0.6	0.0459	1.62e-17	1.57e-09	4.29e-11	0.51	2.49e-17	3.01e-10	1.2e-11	0.0129	1.17e-18	5.34e-19	1.42e-17	0.000185	2.72e-09	6.51e-11	0.0744	1.41e-16	7.67e-09	5.13e-10	0.568	2.67e-16	2.3e-09	2.83e-10	0.0204	2.9e-17	1.19e-17	1.99e-16	0.000418	1.03e-07	6.92e-10	FALSE	TRUE	FALSE
P07451	CA3	-0.774	-5.32	0.0389	-0.613	0.207	-4.55	0.813	0.161	0.981	5.36	4.71	5.53	-0.652	0.168	0.82	0.00032	8.05e-12	0.812	0.00167	0.329	3.66e-11	0.000508	0.286	0.000713	2.2e-11	2.62e-11	1.57e-10	0.00232	0.451	0.0024	0.000931	2.05e-11	0.84	0.00315	0.387	9.87e-11	0.00104	0.37	0.00141	7.57e-11	7.89e-11	4.64e-10	0.00425	0.565	0.00422	FALSE	TRUE	FALSE
P07686	HEXB	0.109	-3.31	-0.885	0.487	-0.438	-3.42	-0.994	0.378	-0.548	2.43	3.8	2.87	1.37	0.447	-0.925	0.136	2.15e-09	3.89e-06	0.000313	0.000256	1.78e-09	2.02e-06	0.00116	7.72e-05	1.75e-09	9.8e-10	1.26e-09	3.25e-07	4.71e-05	4.2e-06	0.191	3.98e-09	9.91e-06	0.000675	0.000533	3.75e-09	6.32e-06	0.00295	0.00018	4.52e-09	2.29e-09	3.28e-09	1.28e-06	0.000308	1.27e-05	FALSE	TRUE	FALSE
P07737	PFN1	-0.661	-5.76	-0.194	-0.464	0.984	-5.1	0.467	0.197	1.65	5.57	5.3	6.75	-0.27	1.18	1.45	0.00024	2.8e-15	0.163	0.00373	5.03e-06	1.3e-14	0.00357	0.157	1.54e-08	4.32e-15	8.08e-15	3.81e-16	0.0605	7.17e-07	6.88e-08	0.000717	1.33e-14	0.2	0.00664	1.39e-05	6.61e-14	0.00638	0.223	7.47e-08	3.15e-14	4.57e-14	3.46e-15	0.0841	8.95e-06	3.09e-07	FALSE	TRUE	FALSE
P07741	APRT	-0.582	-4.23	-0.369	0.228	0.615	-3.65	0.214	0.811	1.2	3.87	4.46	4.85	0.597	0.983	0.387	0.00217	8.88e-13	0.031	0.158	0.00145	5.63e-12	0.184	0.000147	3.07e-06	2.77e-12	4.6e-13	1.62e-13	0.00181	2.34e-05	0.0249	0.00504	2.59e-12	0.0427	0.2	0.00267	1.71e-11	0.233	0.000453	9.25e-06	1.09e-11	1.81e-12	7.81e-13	0.00338	0.000174	0.0367	FALSE	TRUE	FALSE
P07814	EPRS	0.0316	-1.75	0.217	0.254	0.122	-1.78	0.186	0.222	0.0909	1.97	2	1.87	0.0364	-0.095	-0.131	0.103	1.22e-19	2.44e-08	3.87e-09	1.4e-05	9.73e-20	1.51e-07	1.88e-08	0.000238	2.75e-20	2.18e-20	5.17e-20	0.0648	0.000161	6.82e-06	0.151	2.33e-18	9.16e-08	2.45e-08	3.57e-05	2.79e-18	6e-07	1.48e-07	0.00051	1.76e-18	1.13e-18	2.42e-18	0.0894	0.000853	1.97e-05	FALSE	TRUE	FALSE
P07900	HSP90AA1	-0.931	-3.83	-0.352	0.141	-0.277	-2.9	0.579	1.07	0.654	3.48	3.98	3.56	0.493	0.0747	-0.418	2.33e-15	3.68e-23	4.44e-10	1.49e-05	7.93e-09	1.26e-21	9.16e-13	3.91e-16	2e-13	1.25e-22	2.32e-23	9.54e-23	6.9e-12	0.00345	5.31e-11	8.7e-13	6.21e-21	2.41e-09	4.14e-05	3.9e-08	1.22e-19	1.33e-11	7.15e-14	3.49e-12	3.51e-20	1.13e-20	2.18e-20	1.04e-10	0.011	5.8e-10	FALSE	TRUE	FALSE
P07942	LAMB1	-0.323	-2.24	-2.77	-1.3	-2.41	-1.92	-2.45	-0.974	-2.09	-0.534	0.942	-0.174	1.48	0.361	-1.12	2.31e-05	2.16e-15	1.44e-16	2.08e-12	8.38e-16	1.54e-14	6.87e-16	7.26e-11	5.14e-15	9.77e-08	1.1e-10	0.00414	4.09e-13	7.45e-06	1.35e-11	9.4e-05	1.06e-14	4.61e-15	3.73e-11	2.35e-14	7.66e-14	2.68e-14	1.2e-09	1.5e-13	2.02e-07	2.95e-10	0.00506	9.86e-12	6.63e-05	1.82e-10	FALSE	TRUE	TRUE
P07947	YES1	NA	NA	NA	NA	NA	-2.49	-1.29	-0.28	-0.979	1.2	2.21	1.51	1.01	0.314	-0.699	NA	NA	NA	NA	NA	2.64e-06	0.000169	0.229	0.000874	3.17e-05	5.74e-06	7.14e-06	0.000718	0.0381	0.0053	NA	NA	NA	NA	NA	3.83e-06	0.000369	0.307	0.00169	4.8e-05	8.46e-06	1.17e-05	0.00147	0.0818	0.00878	FALSE	FALSE	FALSE
P07951	TPM2	-0.836	-2.06	-5.34	-2.81	-5.43	-1.22	-4.51	-1.98	-4.6	-3.29	-0.754	-3.38	2.53	-0.0912	-2.62	3.26e-14	3.61e-19	1.96e-24	6.83e-21	1.58e-24	2.67e-16	1.7e-23	6.01e-19	1.32e-23	9.47e-22	1.18e-13	6.69e-22	2.61e-20	0.00171	1.66e-20	4.88e-12	5.59e-18	2.8e-21	2.34e-17	2.7e-21	2.07e-15	1.57e-20	1.1e-15	2.42e-20	1.38e-19	5.32e-13	8.67e-20	1.24e-17	0.00621	7.88e-18	FALSE	TRUE	TRUE
P07954	FH	NA	NA	NA	NA	NA	NA	NA	NA	NA	2.52	4.43	1.85	1.91	-0.669	-2.58	NA	NA	NA	NA	NA	NA	NA	NA	NA	3.45e-05	8.6e-06	0.000232	0.00144	0.0383	0.000254	NA	NA	NA	NA	NA	NA	NA	NA	NA	5.2e-05	1.24e-05	0.000322	0.00276	0.0821	0.000539	FALSE	FALSE	FALSE
P08047	SP1	-0.741	-1.96	-0.944	-1.07	-0.677	-1.22	-0.202	-0.326	0.0643	1.02	0.894	1.28	-0.124	0.267	0.391	3.35e-07	2.71e-12	2.06e-08	4.75e-09	9.23e-07	9.48e-10	0.0212	0.00101	0.419	8.39e-09	3.89e-08	5.07e-10	0.132	0.00434	0.000229	2.39e-06	7.29e-12	7.91e-08	2.9e-08	2.98e-06	2.08e-09	0.0327	0.00261	0.48	1.98e-08	7.34e-08	1.4e-09	0.17	0.0133	0.000491	FALSE	TRUE	FALSE
P08069	IGF1R	NA	NA	NA	NA	NA	NA	NA	NA	NA	0.203	2.25	0.106	2.05	-0.0978	-2.14	NA	NA	NA	NA	NA	NA	NA	NA	NA	0.459	6.91e-05	0.697	0.000132	0.718	9.63e-05	NA	NA	NA	NA	NA	NA	NA	NA	NA	0.478	9.18e-05	0.713	0.000308	0.797	0.000221	FALSE	FALSE	FALSE
P08123	COL1A2	-0.539	-3.06	-2.45	-0.753	-2.29	-2.52	-1.91	-0.214	-1.75	0.606	2.3	0.767	1.7	0.161	-1.54	0.000644	2.77e-12	4.32e-11	3.2e-05	1e-10	3.11e-11	9.12e-10	0.0994	2.65e-09	0.000242	9.29e-11	2.67e-05	3.82e-09	0.203	1.26e-08	0.0017	7.46e-12	3.06e-10	8.3e-05	7.54e-10	8.46e-11	6.31e-09	0.152	1.51e-08	0.000334	2.53e-10	4.09e-05	2.39e-08	0.309	6.78e-08	FALSE	TRUE	TRUE
P08133	ANXA6	-0.287	-4.73	-2.84	-1.01	-2.26	-4.44	-2.55	-0.727	-1.97	1.89	3.71	2.47	1.82	0.582	-1.24	5.37e-05	1.13e-19	7.31e-17	3.04e-11	1.34e-15	2.51e-19	2.83e-16	1.8e-09	7.49e-15	1.26e-14	2.42e-18	4.22e-16	1.96e-14	2.53e-08	2.46e-12	0.000195	2.21e-18	2.62e-15	3.79e-10	3.59e-14	5.95e-18	1.2e-14	1.96e-08	2.1e-13	8.26e-14	4.12e-17	3.78e-15	7.7e-13	5.95e-07	4.41e-11	FALSE	TRUE	TRUE
P08183	ABCB1	NA	NA	NA	NA	NA	NA	NA	NA	NA	0.369	2.31	1.03	1.94	0.659	-1.28	NA	NA	NA	NA	NA	NA	NA	NA	NA	0.0655	4.77e-07	0.000271	2.01e-06	0.00475	5.44e-05	NA	NA	NA	NA	NA	NA	NA	NA	NA	0.0732	7.91e-07	0.000372	6.67e-06	0.0144	0.000132	FALSE	FALSE	FALSE
P08195	SLC3A2	0.0756	-3.82	-3.65	-1.86	-3.06	-3.89	-3.72	-1.94	-3.14	0.174	1.96	0.758	1.78	0.585	-1.2	0.756	8.28e-10	1.46e-09	3.31e-06	1.19e-08	6.52e-10	1.14e-09	2.16e-06	8.87e-09	0.479	1.96e-06	0.00739	5.28e-06	0.0294	0.000248	0.805	1.62e-09	7.18e-09	1.05e-05	5.63e-08	1.46e-09	7.57e-09	9.99e-06	4.56e-08	0.498	3.03e-06	0.00886	1.59e-05	0.0662	0.000527	FALSE	TRUE	TRUE
P08237	PFKM	0.0762	-1.41	0.568	0.372	0.341	-1.49	0.492	0.296	0.265	1.98	1.79	1.75	-0.196	-0.227	-0.0312	0.236	9.32e-12	5.1e-07	4.3e-05	9.84e-05	4.85e-12	2.48e-06	0.000346	0.000865	1.36e-13	5.02e-13	6.26e-13	0.00722	0.00274	0.619	0.307	2.36e-11	1.49e-06	0.000109	0.000217	1.49e-11	7.66e-06	0.000988	0.00168	6.94e-13	1.96e-12	2.72e-12	0.012	0.00913	0.666	FALSE	TRUE	FALSE
P08238	HSP90AB1	-0.876	-3.61	-0.202	0.109	-0.121	-2.74	0.674	0.985	0.755	3.41	3.72	3.49	0.312	0.0816	-0.23	2.54e-15	3.95e-23	1.65e-07	0.000105	4.04e-05	1.35e-21	6.98e-14	5.74e-16	1.65e-14	8.21e-23	2.7e-23	6.08e-23	1e-09	0.00124	3.75e-08	8.7e-13	6.35e-21	5.27e-07	0.000249	9.56e-05	1.27e-19	1.44e-12	8.91e-14	4.16e-13	2.67e-20	1.13e-20	1.69e-20	7.49e-09	0.00476	1.78e-07	FALSE	TRUE	FALSE
P08240	SRPRA	-0.118	-1.37	-2.87	-1.06	-2.42	-1.25	-2.75	-0.941	-2.31	-1.5	0.309	-1.06	1.81	0.45	-1.36	0.00834	3.43e-14	2.87e-18	8.6e-13	2.49e-17	1.07e-13	4.9e-18	3.78e-12	4.69e-17	1.03e-14	2.09e-06	8.99e-13	9.74e-16	3.04e-08	3.55e-14	0.0164	1.29e-13	1.83e-16	1.78e-11	1.14e-15	4.45e-13	3.78e-16	1.04e-10	2.5e-15	6.9e-14	3.22e-06	3.78e-12	6.08e-14	6.72e-07	1.18e-12	FALSE	TRUE	TRUE
P08243	ASNS	-0.243	-5	-0.101	0.199	0.84	-4.76	0.143	0.442	1.08	4.9	5.2	5.84	0.299	0.941	0.642	0.355	6.53e-11	0.698	0.448	0.00577	1.21e-10	0.583	0.106	0.000954	8.39e-11	4.04e-11	9.53e-12	0.26	0.00272	0.0255	0.432	1.48e-10	0.738	0.508	0.00954	3.03e-10	0.643	0.159	0.00184	2.63e-10	1.18e-10	3.35e-11	0.311	0.00906	0.0375	FALSE	TRUE	FALSE
P08559	PDHA1	0.929	-1.8	-2.47	-0.253	-2.23	-2.73	-3.4	-1.18	-3.16	-0.672	1.55	-0.428	2.22	0.243	-1.98	0.0169	0.000211	1.36e-05	0.458	3.45e-05	1.87e-07	2.01e-08	0.000383	4.29e-08	0.0151	4.04e-05	0.0933	1.43e-06	0.318	4.34e-06	0.0309	0.000252	3.16e-05	0.518	8.25e-05	3.07e-07	9.76e-08	0.00108	1.88e-07	0.0178	5.46e-05	0.103	4.88e-06	0.437	1.31e-05	FALSE	TRUE	TRUE
P08572	COL4A2	NA	NA	NA	NA	NA	-2.92	-2.13	-0.361	-1.55	0.797	2.56	1.37	1.76	0.573	-1.19	NA	NA	NA	NA	NA	6.55e-06	5e-05	0.247	0.000342	0.0021	1.53e-05	8.89e-05	0.000158	0.0109	0.00156	NA	NA	NA	NA	NA	9.12e-06	0.000119	0.328	0.000714	0.00265	2.17e-05	0.000129	0.000363	0.0291	0.00284	FALSE	FALSE	FALSE
P08574	CYC1	NA	NA	NA	NA	NA	NA	NA	NA	NA	-1.89	0.526	-1.39	2.41	0.502	-1.91	NA	NA	NA	NA	NA	NA	NA	NA	NA	1.37e-07	0.00229	1.8e-06	1.7e-08	0.00302	1.23e-07	NA	NA	NA	NA	NA	NA	NA	NA	NA	2.77e-07	0.0027	3.15e-06	8.83e-08	0.00993	5.2e-07	FALSE	FALSE	FALSE
P08648	ITGA5	-1.8	-4.86	-4.29	-2.4	-3.79	-3.07	-2.5	-0.598	-1.99	0.569	2.47	1.07	1.9	0.502	-1.4	4.28e-09	4.41e-14	1.66e-13	8.15e-11	6.26e-13	6.01e-12	5.28e-11	7.53e-05	5.61e-10	4.44e-05	1.84e-11	1.07e-07	2.92e-10	0.000129	7.19e-09	6.21e-08	1.61e-13	2.26e-12	8.73e-10	8.13e-12	1.81e-11	4.84e-10	0.000249	3.77e-09	6.6e-05	5.65e-11	2.18e-07	2.66e-09	0.0007	4.14e-08	TRUE	TRUE	TRUE
P08651	NFIC	-0.48	0.726	-0.414	-0.843	-0.344	1.21	0.0663	-0.363	0.136	-1.14	-1.57	-1.07	-0.429	0.0701	0.5	5.32e-06	5.39e-08	2.43e-05	9.15e-09	0.000142	1.2e-10	0.321	8.61e-05	0.054	2.41e-10	4.6e-12	5.23e-10	1.69e-05	0.295	3.51e-06	2.55e-05	8.61e-08	5.46e-05	5.14e-08	0.000306	3.02e-10	0.383	0.000282	0.0761	7.04e-10	1.55e-11	1.44e-09	4.61e-05	0.412	1.08e-05	FALSE	FALSE	FALSE
P08670	VIM	0.0766	-1.66	-2.56	-0.776	-2.46	-1.73	-2.64	-0.852	-2.54	-0.905	0.881	-0.807	1.79	0.0981	-1.69	0.000527	9e-20	3.55e-22	1.36e-15	5.82e-22	5.07e-20	2.44e-22	4.13e-16	3.95e-22	1.94e-16	2.71e-16	8.27e-16	3.47e-20	5.81e-05	7.11e-20	0.00143	1.88e-18	1.08e-19	8.64e-14	1.56e-19	1.74e-18	1.13e-19	7.19e-14	1.79e-19	2.04e-15	2.29e-15	6.84e-15	1.47e-17	0.000367	2.99e-17	FALSE	TRUE	TRUE
P08708	RPS17	0.255	2.61	0.623	0.297	0.473	2.36	0.367	0.0418	0.217	-1.99	-2.32	-2.14	-0.326	-0.15	0.176	1.13e-06	4.07e-19	2.89e-11	2.06e-07	8.52e-10	1.5e-18	1.75e-08	0.181	6.3e-06	1.29e-17	1.88e-18	5.12e-18	7.2e-08	0.000229	5.38e-05	6.74e-06	6.16e-18	2.14e-10	8.37e-07	5.17e-09	2.4e-17	8.62e-08	0.251	1.78e-05	2.04e-16	3.35e-17	8.7e-17	3.27e-07	0.00114	0.00013	FALSE	TRUE	FALSE
P08754	GNAI3	0.231	-3.25	-3.58	-1.18	-3.39	-3.48	-3.81	-1.41	-3.62	-0.33	2.07	-0.139	2.4	0.191	-2.21	0.364	5.83e-09	1.97e-09	0.000175	3.65e-09	9.4e-09	3.42e-09	9.73e-05	6.08e-09	0.158	7.81e-07	0.537	1.63e-07	0.4	3.94e-07	0.44	1.03e-08	9.49e-09	0.000398	1.93e-08	1.79e-08	1.99e-08	0.000314	3.23e-08	0.172	1.27e-06	0.555	6.87e-07	0.517	1.49e-06	FALSE	TRUE	TRUE
P08758	ANXA5	-0.385	-4.41	-1.2	-0.565	-1.3	-4.02	-0.819	-0.18	-0.918	3.2	3.84	3.11	0.639	-0.0987	-0.737	0.000469	2.41e-16	2.58e-09	1.31e-05	9.93e-10	7.65e-16	2.37e-07	0.0482	6.42e-08	1.36e-14	1.37e-15	2.02e-14	3.67e-06	0.253	7.71e-07	0.0013	1.51e-15	1.21e-08	3.7e-05	5.95e-09	5.27e-15	9.06e-07	0.081	2.68e-07	8.84e-14	9.44e-15	1.18e-13	1.15e-05	0.366	2.74e-06	FALSE	TRUE	TRUE
P08779	KRT16	-1.32	-0.758	-0.192	0.0883	1.21	0.557	1.12	1.4	2.53	0.566	0.846	1.97	0.281	1.4	1.12	1.14e-12	1.03e-09	0.0016	0.0903	3.17e-12	4.05e-08	8.18e-12	5.04e-13	3.03e-16	3.4e-08	2.69e-10	7.08e-15	6.45e-05	5.02e-13	8.15e-12	7.36e-11	1.99e-09	0.00272	0.121	3.37e-11	7.14e-08	9.58e-11	1.92e-11	1.25e-14	7.36e-08	6.77e-10	4.54e-14	0.000158	1.24e-10	1.2e-10	TRUE	FALSE	FALSE
P08865	RPSA	0.0904	3.15	0.47	0.162	0.223	3.06	0.38	0.0715	0.133	-2.68	-2.99	-2.92	-0.308	-0.247	0.0612	0.00331	4.73e-21	1.21e-10	2.38e-05	8.12e-07	6.86e-21	1.64e-09	0.0139	0.000158	3.7e-20	9.26e-21	1.2e-20	1.99e-08	2.57e-07	0.0302	0.00728	1.92e-19	7.49e-10	6.36e-05	2.66e-06	4.59e-19	1.05e-08	0.0268	0.000349	2.11e-18	6.47e-19	7.55e-19	1.01e-07	3.93e-06	0.0439	FALSE	TRUE	FALSE
P09104	ENO2	-0.121	-1.93	-0.837	-0.585	-1.23	-1.81	-0.716	-0.464	-1.11	1.09	1.34	0.696	0.251	-0.396	-0.648	0.41	6.04e-09	5.78e-05	0.00125	1.06e-06	1.31e-08	0.000241	0.00624	3.24e-06	3.91e-06	4.05e-07	0.000306	0.1	0.0156	0.000564	0.487	1.07e-08	0.000123	0.00241	3.36e-06	2.44e-08	0.000514	0.0132	9.74e-06	6.6e-06	6.75e-07	0.000417	0.133	0.0391	0.00112	FALSE	TRUE	FALSE
P09110	ACAA1	NA	NA	NA	NA	NA	-3.28	-0.476	NA	-1.89	2.81	NA	1.39	NA	-1.41	NA	NA	NA	NA	NA	NA	6.6e-06	0.114	NA	0.000214	1.92e-06	NA	0.000164	NA	0.000152	NA	NA	NA	NA	NA	NA	9.19e-06	0.151	NA	0.000462	3.37e-06	NA	0.000231	NA	0.000811	NA	FALSE	FALSE	FALSE
P09132	SRP19	0.936	1.05	1.25	2.24	1.47	0.119	0.31	1.3	0.535	0.192	1.18	0.417	0.993	0.225	-0.768	5.05e-07	1.54e-07	2.85e-08	2.06e-10	1.63e-08	0.206	0.005	5.63e-08	0.000225	0.0531	1.47e-07	0.00149	8.45e-07	0.0436	2.25e-05	3.44e-06	2.37e-07	1.06e-07	1.94e-09	7.61e-08	0.215	0.00867	3.87e-07	0.000486	0.0598	2.59e-07	0.0019	3.04e-06	0.0911	5.89e-05	FALSE	TRUE	TRUE
P09382	LGALS1	-0.052	-3.34	-1.23	-0.37	-0.947	-3.29	-1.18	-0.318	-0.895	2.11	2.97	2.39	0.861	0.284	-0.577	0.44	4.15e-16	1.13e-10	8.4e-05	2.75e-09	5.06e-16	1.91e-10	0.000327	5.41e-09	1.38e-13	1.83e-15	2.8e-14	8.56e-09	0.000824	8.62e-07	0.52	2.41e-15	7.01e-10	0.000202	1.5e-08	3.63e-15	1.53e-09	0.000934	2.89e-08	7.01e-13	1.23e-14	1.6e-13	4.87e-08	0.00336	3.02e-06	FALSE	TRUE	TRUE
P09417	QDPR	NA	NA	NA	NA	NA	-3.85	-0.871	0.433	NA	2.98	4.28	NA	1.3	NA	NA	NA	NA	NA	NA	NA	3.63e-07	0.0177	0.0658	NA	1.85e-05	1.79e-07	NA	0.00253	NA	NA	NA	NA	NA	NA	NA	5.78e-07	0.0277	0.106	NA	2.9e-05	3.13e-07	NA	0.00462	NA	NA	FALSE	FALSE	FALSE
P09429	HMGB1	-0.739	-4.71	-0.826	-0.866	-0.133	-3.97	-0.087	-0.127	0.605	3.88	3.84	4.57	-0.0404	0.692	0.733	3.84e-11	2.7e-21	9.65e-12	5.32e-12	0.00267	2.36e-20	0.031	0.00366	4.45e-10	3.13e-20	3.57e-20	3.89e-21	0.281	8.56e-11	4.25e-11	1.28e-09	1.31e-19	8.04e-11	8.52e-11	0.00468	1.02e-18	0.0461	0.00825	3.1e-09	1.92e-18	1.51e-18	3.22e-19	0.332	8.91e-09	4.85e-10	FALSE	TRUE	FALSE
P09471	GNAO1	-0.184	-2.38	-2.1	-1.06	-1.81	-2.19	-1.92	-0.875	-1.63	0.273	1.32	0.562	1.04	0.29	-0.755	0.0222	8.53e-14	3.95e-13	1.9e-09	2.52e-12	2.35e-13	1.24e-12	1.86e-08	9.57e-12	0.00208	1.34e-10	2.8e-06	2.26e-09	0.00133	1.05e-07	0.0392	2.99e-13	4.76e-12	1.3e-08	2.75e-11	9.09e-13	1.76e-11	1.47e-07	1.06e-10	0.00263	3.54e-10	4.81e-06	1.5e-08	0.00505	4.49e-07	FALSE	TRUE	TRUE
P09486	SPARC	-0.305	-4.39	-2.41	-0.867	-2.68	-4.08	-2.1	-0.563	-2.37	1.98	3.52	1.71	1.54	-0.266	-1.81	0.0165	1.01e-14	1.86e-11	3.13e-06	5.04e-12	2.51e-14	9.87e-11	0.000219	2.26e-11	2.11e-10	1.62e-13	1.23e-09	4.35e-09	0.0317	6.34e-10	0.0303	4.25e-14	1.44e-10	9.99e-06	5.14e-11	1.18e-13	8.5e-10	0.000652	2.28e-10	6.24e-10	7e-13	3.22e-09	2.68e-08	0.071	4.84e-09	FALSE	TRUE	TRUE
P09488	GSTM1	-0.334	-4.83	0.3	-0.0807	0.493	-4.5	0.634	0.254	0.827	5.13	4.75	5.32	-0.38	0.193	0.573	0.253	3.27e-10	0.303	0.777	0.102	7.85e-10	0.0413	0.381	0.0113	1.57e-10	4.02e-10	9.94e-11	0.197	0.502	0.0612	0.324	6.71e-10	0.35	0.816	0.133	1.74e-09	0.0602	0.471	0.0181	4.71e-10	9.98e-10	3.02e-10	0.244	0.612	0.084	FALSE	TRUE	FALSE
P09493	TPM1	-0.868	-2.41	-5.1	-2.57	-5.17	-1.54	-4.23	-1.71	-4.3	-2.69	-0.167	-2.76	2.53	-0.0695	-2.6	2.2e-12	5.6e-18	4.03e-22	2.39e-18	3.4e-22	1.61e-15	4.31e-21	4.37e-16	3.5e-21	1.34e-18	0.000264	9.72e-19	3.03e-18	0.0588	2.14e-18	1.28e-10	5.54e-17	1.08e-19	1.17e-15	1.06e-19	1.04e-14	1.23e-18	7.26e-14	9.91e-19	3.28e-17	0.000333	2.37e-17	7.21e-16	0.116	5.42e-16	FALSE	TRUE	TRUE
P09496	CLTA	-0.339	1.16	-0.207	0.0511	0.112	1.5	0.132	0.39	0.451	-1.36	-1.11	-1.05	0.258	0.319	0.0608	4.59e-08	1.25e-14	1.07e-05	0.109	0.0024	4.86e-16	0.000677	8.77e-09	1.54e-09	1.57e-15	2.21e-14	4.5e-14	1.02e-06	9.38e-08	0.0614	4.34e-07	5.15e-14	2.55e-05	0.142	0.00424	3.5e-15	0.00135	7.64e-08	9.39e-09	1.28e-14	1.13e-13	2.45e-13	3.61e-06	1.7e-06	0.0843	FALSE	TRUE	FALSE
P09525	ANXA4	NA	NA	NA	NA	NA	-3.63	-2.68	-0.509	-2.47	0.944	3.12	1.15	2.17	0.206	-1.97	NA	NA	NA	NA	NA	9.96e-09	1.29e-07	0.0177	2.54e-07	3.77e-05	1.86e-09	7.97e-06	4.08e-08	0.13	9.52e-08	NA	NA	NA	NA	NA	1.89e-08	5.23e-07	0.0334	9.52e-07	5.65e-05	4.19e-09	1.29e-05	1.94e-07	0.216	4.12e-07	FALSE	FALSE	FALSE
P09619	PDGFRB	-1.62	-4.5	-4.6	-2.73	-4.04	-2.88	-2.99	-1.11	-2.42	-0.105	1.77	0.461	1.88	0.566	-1.31	1.42e-06	3.92e-11	3.08e-11	7.37e-09	1.23e-10	1.11e-10	7.6e-11	1.85e-06	6.91e-10	0.4	1.78e-08	0.0028	9.83e-09	0.000662	3.73e-07	8.28e-06	9.11e-11	2.26e-10	4.25e-08	9.15e-10	2.8e-10	6.71e-10	8.72e-06	4.52e-09	0.419	3.49e-08	0.00349	5.54e-08	0.00283	1.43e-06	TRUE	TRUE	TRUE
P09622	DLD	NA	NA	NA	NA	NA	NA	NA	NA	NA	0.676	3.47	0.594	2.8	-0.0819	-2.88	NA	NA	NA	NA	NA	NA	NA	NA	NA	2.92e-07	5.29e-11	6.86e-07	2.26e-10	0.046	1.86e-10	NA	NA	NA	NA	NA	NA	NA	NA	NA	5.7e-07	1.51e-10	1.27e-06	2.12e-09	0.0953	1.7e-09	FALSE	FALSE	FALSE
P09874	PARP1	-0.699	-2.1	-2.4	-1.27	-2.04	-1.41	-1.7	-0.57	-1.34	-0.298	0.835	0.0616	1.13	0.36	-0.774	5.62e-11	5.47e-17	1.02e-17	3.26e-14	7.97e-17	9.06e-15	7.97e-16	6.91e-10	1.6e-14	1.33e-06	6.22e-12	0.103	1.36e-13	1.62e-07	1.61e-11	1.74e-09	4.15e-16	5.23e-16	1.11e-12	3.1e-15	4.74e-14	3.03e-14	8.33e-09	4.05e-13	2.39e-06	2.04e-11	0.113	4.06e-12	2.67e-06	2.1e-10	FALSE	TRUE	TRUE
P09884	POLA1	-2.55	-3.29	-1.11	-1.85	-0.952	-0.74	1.44	0.702	1.6	2.18	1.44	2.34	-0.74	0.156	0.895	0.000329	6.09e-05	0.0297	0.00342	0.0246	0.0262	0.00555	0.0821	0.000811	0.000546	0.00423	5.92e-05	0.105	0.639	0.0308	0.000951	7.53e-05	0.0411	0.00612	0.0365	0.0286	0.00954	0.128	0.00158	0.00073	0.0049	8.74e-05	0.139	0.73	0.0448	TRUE	TRUE	FALSE
P09914	IFIT1	1.39	NA	1.54	1.43	1.79	NA	0.151	0.0436	0.399	NA	NA	NA	-0.108	0.248	0.356	0.00258	NA	0.00179	0.00382	0.00105	NA	0.394	0.833	0.0686	NA	NA	NA	0.608	0.195	0.144	0.00586	NA	0.00302	0.00677	0.00198	NA	0.456	0.873	0.0944	NA	NA	NA	0.654	0.3	0.182	TRUE	FALSE	TRUE
P09917	ALOX5	-0.0407	-3.37	-2.85	-0.848	-2.56	-3.33	-2.81	-0.808	-2.52	0.519	2.52	0.814	2	0.296	-1.71	0.501	1.01e-16	8.35e-16	3.01e-09	3.34e-15	1.18e-16	1e-15	5.43e-09	4.09e-15	9.08e-07	3.95e-15	4.91e-09	7.2e-14	0.00025	5.36e-13	0.578	7.01e-16	2.24e-14	1.95e-08	7.94e-14	1.02e-15	3.75e-14	4.96e-08	1.23e-13	1.67e-06	2.4e-14	1.17e-08	2.34e-12	0.00122	1.2e-11	FALSE	TRUE	TRUE
P09960	LTA4H	NA	-3.58	NA	NA	NA	NA	NA	NA	NA	NA	NA	NA	NA	NA	NA	NA	1.82e-06	NA	NA	NA	NA	NA	NA	NA	NA	NA	NA	NA	NA	NA	NA	2.52e-06	NA	NA	NA	NA	NA	NA	NA	NA	NA	NA	NA	NA	NA	FALSE	TRUE	FALSE
P0C0L4	C4A	-0.229	-3.88	-0.965	-0.259	-0.962	-3.66	-0.736	-0.0303	-0.733	2.92	3.63	2.92	0.706	0.00306	-0.703	0.118	6.89e-13	9.64e-06	0.0809	9.96e-06	1.47e-12	0.000134	0.828	0.000139	2.42e-11	1.63e-12	2.39e-11	0.000196	0.982	0.000203	0.169	2.04e-12	2.31e-05	0.11	2.62e-05	4.92e-12	0.000298	0.87	0.000312	8.23e-11	5.86e-12	7.95e-11	0.00044	0.988	0.000441	FALSE	TRUE	FALSE
P0C0S5	H2AFZ	-0.271	0.768	-0.0586	-0.141	0.122	1.04	0.212	0.129	0.393	-0.826	-0.909	-0.646	-0.0828	0.181	0.263	4.31e-05	3.41e-10	0.211	0.00748	0.0172	8.2e-12	0.000395	0.0126	8.96e-07	1.38e-10	4.26e-11	2.79e-09	0.0862	0.00142	5.6e-05	0.000161	6.99e-10	0.252	0.0125	0.0262	2.41e-11	0.000823	0.0246	2.99e-06	4.19e-10	1.24e-10	6.9e-09	0.116	0.00532	0.000136	FALSE	FALSE	FALSE
P0C2W1	FBXO45	-0.12	-1.5	-0.774	-0.687	-0.941	-1.38	-0.655	-0.567	-0.822	0.725	0.813	0.559	0.0875	-0.167	-0.254	0.672	0.000126	0.0153	0.0277	0.00484	0.000264	0.0345	0.0614	0.011	0.0214	0.0117	0.065	0.757	0.557	0.375	0.737	0.000152	0.0221	0.0413	0.0081	0.000324	0.0509	0.0998	0.0178	0.0248	0.0132	0.0727	0.792	0.661	0.427	FALSE	TRUE	FALSE
P0DJD0	RGPD1	0.622	-1.02	-0.742	0.038	-0.763	-1.64	-1.36	-0.584	-1.39	0.273	1.05	0.253	0.781	-0.0204	-0.801	8.08e-06	3.46e-08	1.22e-06	0.668	9.08e-07	1.09e-10	1.02e-09	1.54e-05	8.53e-10	0.00777	2.25e-08	0.0122	7.05e-07	0.818	5.29e-07	3.67e-05	5.63e-08	3.35e-06	0.72	2.94e-06	2.77e-10	6.86e-09	5.91e-05	5.48e-09	0.00933	4.37e-08	0.0143	2.57e-06	0.869	1.96e-06	FALSE	TRUE	FALSE
P0DMV8	HSPA1A	-0.468	-2.83	-0.439	-0.254	-0.271	-2.36	0.0293	0.214	0.197	2.39	2.58	2.56	0.185	0.168	-0.0174	1.2e-05	5.35e-15	2.3e-05	0.00254	0.00157	5.22e-14	0.672	0.00762	0.0124	4.47e-14	1.75e-14	1.9e-14	0.0174	0.0282	0.802	5.25e-05	2.39e-14	5.19e-05	0.00464	0.00288	2.29e-13	0.725	0.0157	0.0197	2.51e-13	9.19e-14	1.12e-13	0.0269	0.064	0.83	FALSE	TRUE	FALSE
P0DOY2	IGLC2	-2.06	0.363	0.473	-1.01	-0.213	2.42	2.53	1.05	1.84	0.11	-1.37	-0.576	-1.48	-0.685	0.797	4.4e-10	0.0109	0.00198	1.76e-06	0.105	5.98e-11	3.46e-11	1.19e-06	1.66e-09	0.385	5.52e-08	0.000421	2.25e-08	8.99e-05	2.09e-05	9.26e-09	0.0119	0.00331	5.91e-06	0.137	1.57e-10	3.36e-10	5.82e-06	9.99e-09	0.404	1.02e-07	0.000568	1.13e-07	0.00052	5.51e-05	TRUE	FALSE	FALSE
P0DP23	CALM1	-0.752	NA	-0.861	-1.01	-1.33	NA	-0.108	-0.257	-0.573	NA	NA	NA	-0.148	-0.465	-0.316	6.55e-07	NA	1.72e-07	3.45e-08	2.07e-09	NA	0.165	0.00488	8.78e-06	NA	NA	NA	0.0666	5.77e-05	0.00122	4.24e-06	NA	5.47e-07	1.68e-07	1.16e-08	NA	0.21	0.0106	2.42e-05	NA	NA	NA	0.0916	0.000364	0.00227	FALSE	FALSE	FALSE
P0DPB6	POLR1D.1	-0.0546	-0.552	-1.65	-0.711	-1.09	-0.497	-1.6	-0.656	-1.03	-1.1	-0.159	-0.534	0.94	0.565	-0.375	0.596	0.00011	6.01e-10	9.28e-06	8.79e-08	0.000279	9.05e-10	2.09e-05	1.59e-07	7.68e-08	0.138	0.000149	4.56e-07	8.92e-05	0.00257	0.666	0.000134	3.19e-09	2.71e-05	3.53e-07	0.000342	6.26e-09	7.74e-05	6.23e-07	1.59e-07	0.146	0.000211	1.72e-06	0.000519	0.00449	FALSE	FALSE	TRUE
P0DPH7	TUBA3C	0.389	-0.78	0.547	0.94	0.218	-1.17	0.158	0.55	-0.172	1.33	1.72	0.998	0.392	-0.329	-0.722	0.243	0.0294	0.11	0.0114	0.506	0.00289	0.628	0.108	0.599	0.00114	0.000129	0.00804	0.24	0.32	0.0413	0.314	0.0316	0.139	0.0184	0.563	0.00331	0.685	0.162	0.652	0.00148	0.000168	0.00962	0.29	0.438	0.0584	FALSE	FALSE	FALSE
P10301	RRAS	NA	NA	NA	NA	NA	NA	NA	NA	NA	0.995	2.48	1.24	1.48	0.242	-1.24	NA	NA	NA	NA	NA	NA	NA	NA	NA	3.2e-06	7.63e-09	6.37e-07	3.74e-07	0.0214	1.41e-06	NA	NA	NA	NA	NA	NA	NA	NA	NA	5.45e-06	1.57e-08	1.18e-06	1.44e-06	0.051	4.73e-06	FALSE	FALSE	FALSE
P10398	ARAF	0.476	-1.55	0.601	1.2	-0.092	-2.02	0.125	0.728	-0.568	2.15	2.75	1.46	0.603	-0.693	-1.3	0.0024	3.87e-08	0.000416	1.84e-06	0.471	1.96e-09	0.332	0.000215	0.000653	9.96e-10	2.13e-10	7.56e-08	0.000975	0.000125	8.58e-07	0.00551	6.26e-08	0.000776	6.12e-06	0.529	4.09e-09	0.394	0.00064	0.0013	2.67e-09	5.44e-10	1.56e-07	0.00193	0.000683	3.01e-06	FALSE	TRUE	FALSE
P10412	HIST1H1E	-0.0347	2.06	0.0627	0.0833	0.156	2.09	0.0974	0.118	0.191	-2	-1.98	-1.9	0.0207	0.0935	0.0728	0.169	5.34e-19	0.021	0.00403	2.03e-05	4.32e-19	0.00133	0.000279	2.52e-06	7.9e-19	9.02e-19	1.45e-18	0.401	0.00181	0.00934	0.23	7.59e-18	0.0297	0.00709	5.05e-05	9.08e-18	0.00254	0.000814	7.71e-06	2.22e-17	1.79e-17	3.26e-17	0.457	0.00647	0.0149	FALSE	TRUE	FALSE
P10515	DLAT	-0.382	-1.93	-2.72	-1.35	-2.33	-1.55	-2.34	-0.969	-1.95	-0.786	0.582	-0.4	1.37	0.386	-0.981	0.00122	3.12e-11	4.42e-13	2.49e-09	3.01e-12	4.68e-10	2.94e-12	1.26e-07	2.79e-11	1.32e-06	3.03e-05	0.000862	2.14e-09	0.00112	1.09e-07	0.003	7.32e-11	5.27e-12	1.66e-08	3.23e-11	1.07e-09	3.87e-11	7.97e-07	2.69e-10	2.36e-06	4.14e-05	0.00113	1.44e-08	0.00433	4.61e-07	FALSE	TRUE	TRUE
P10588	NR2F6	NA	NA	NA	NA	NA	-1.69	0.645	0.607	0.405	2.34	2.3	2.1	-0.0382	-0.24	-0.202	NA	NA	NA	NA	NA	3.27e-05	0.0183	0.0239	0.0756	3.19e-06	3.6e-06	3.11e-06	0.864	0.26	0.338	NA	NA	NA	NA	NA	4.3e-05	0.0285	0.0435	0.103	5.44e-06	5.4e-06	5.31e-06	0.887	0.374	0.389	FALSE	FALSE	FALSE
P10599	TXN	-0.354	-3.23	0.107	0.145	0.81	-2.87	0.461	0.5	1.16	3.33	3.37	4.04	0.0386	0.704	0.665	0.0108	1.2e-12	0.385	0.243	1.36e-05	5.13e-12	0.00196	0.00107	2.71e-07	7.98e-13	6.91e-13	7.21e-14	0.751	5.48e-05	9.33e-05	0.0206	3.41e-12	0.436	0.295	3.47e-05	1.57e-11	0.00363	0.00273	1.01e-06	3.53e-12	2.63e-12	3.71e-13	0.786	0.00035	0.000215	FALSE	TRUE	FALSE
P10644	PRKAR1A	-0.152	-2.64	-0.192	-0.121	0.0726	-2.49	-0.0403	0.031	0.224	2.45	2.52	2.71	0.0712	0.264	0.193	0.00825	1.9e-16	0.00172	0.0276	0.159	4.03e-16	0.422	0.535	0.000508	4.95e-16	3.44e-16	1.35e-16	0.166	0.00012	0.00163	0.0162	1.23e-15	0.00291	0.0412	0.2	2.95e-15	0.484	0.623	0.00103	4.65e-15	2.83e-15	1.42e-15	0.21	0.000662	0.00296	FALSE	TRUE	FALSE
P10768	ESD	0.023	-0.787	1.08	-0.102	NA	-0.81	1.06	-0.126	NA	1.87	0.684	NA	-1.18	NA	NA	0.918	0.0113	0.00693	0.668	NA	0.00204	0.00301	0.488	NA	0.000164	0.00751	NA	0.00233	NA	NA	0.938	0.0124	0.0106	0.72	NA	0.00236	0.00545	0.579	NA	0.00023	0.00856	NA	0.00426	NA	NA	FALSE	FALSE	FALSE
P10809	HSPD1	-0.244	-3.68	-2.63	-0.94	-2.91	-3.44	-2.38	-0.696	-2.67	1.06	2.74	0.77	1.69	-0.285	-1.97	0.000116	9.48e-19	6.87e-17	2.81e-11	1.86e-17	2.26e-18	2.36e-16	1.12e-09	5.63e-17	6.7e-12	3.99e-17	3.29e-10	1.86e-14	2.58e-05	2.59e-15	0.000384	1.21e-17	2.56e-15	3.64e-10	8.88e-16	3.38e-17	1.05e-14	1.3e-08	2.96e-15	2.49e-11	4.28e-16	9.31e-10	7.46e-13	0.000187	1.36e-13	FALSE	TRUE	TRUE
P11021	HSPA5	-0.305	-2.7	-2.13	-0.819	-2.15	-2.39	-1.82	-0.513	-1.85	0.574	1.88	0.547	1.31	-0.0273	-1.33	1.04e-08	1.47e-20	3.05e-19	5.38e-14	2.6e-19	6.74e-20	2.19e-18	1.85e-11	1.81e-18	4.63e-12	1.44e-18	8.51e-12	1.46e-16	0.267	1.12e-16	1.27e-07	4.5e-19	2.62e-17	1.66e-12	2.46e-17	2.12e-18	1.88e-16	3.83e-10	1.62e-16	1.78e-11	2.66e-17	3.01e-11	1.37e-14	0.382	1.24e-14	FALSE	TRUE	TRUE
P11047	LAMC1	-0.321	-2.25	-1.78	-1.02	-1.64	-1.93	-1.45	-0.699	-1.32	0.478	1.23	0.61	0.756	0.132	-0.624	0.0409	8.71e-10	1.53e-08	7.62e-06	3.79e-08	5.57e-09	1.56e-07	0.000284	4.58e-07	0.00501	9.91e-07	0.000872	0.000142	0.368	0.000735	0.0674	1.7e-09	6.04e-08	2.26e-05	1.64e-07	1.1e-08	6.2e-07	0.000829	1.63e-06	0.00611	1.59e-06	0.00114	0.000329	0.486	0.00142	FALSE	TRUE	TRUE
P11055	MYH3	0.0325	-2.95	-2.3	0.0573	-2.77	-2.98	-2.33	0.0248	-2.8	0.654	3.01	0.18	2.36	-0.473	-2.83	0.881	1.2e-08	1.84e-07	0.791	2.4e-08	3.05e-09	4.73e-08	0.898	6.12e-09	0.00498	2.78e-09	0.361	4.21e-08	0.0285	5.55e-09	0.907	2.05e-08	5.8e-07	0.828	1.08e-07	6.24e-09	2.13e-07	0.923	3.24e-08	0.00608	6.09e-09	0.38	2e-07	0.0646	3.31e-08	FALSE	TRUE	TRUE
P11117	ACP2	NA	NA	NA	NA	NA	0.111	1.75	1.45	1.39	1.64	1.34	1.28	-0.301	-0.358	-0.057	NA	NA	NA	NA	NA	0.41	5.15e-06	1.74e-05	1.54e-05	1.16e-06	4.37e-06	2.8e-06	0.03	0.0097	0.588	NA	NA	NA	NA	NA	0.422	1.48e-05	6.59e-05	4.06e-05	2.1e-06	6.5e-06	4.81e-06	0.0444	0.0264	0.637	FALSE	FALSE	FALSE
P11142	HSPA8	-0.282	-3	-0.224	-0.195	-0.0848	-2.71	0.0574	0.0871	0.197	2.77	2.8	2.91	0.0297	0.14	0.11	2.28e-10	2.55e-23	3.62e-09	1.96e-08	0.000141	8.97e-23	0.00317	0.00011	1.7e-08	6.88e-23	6e-23	3.68e-23	0.0834	8.82e-07	1.13e-05	5.76e-09	5.07e-21	1.64e-08	1.01e-07	0.000304	1.94e-20	0.00573	0.00035	8.1e-08	2.46e-20	1.61e-20	1.19e-20	0.112	1.07e-05	3.13e-05	FALSE	TRUE	FALSE
P11166	SLC2A1	-0.949	-4.36	-4.38	-2.58	-3.92	-3.41	-3.43	-1.63	-2.97	-0.019	1.77	0.438	1.79	0.457	-1.34	0.00354	6.33e-10	6e-10	3.04e-07	2.29e-09	1.22e-08	1.14e-08	3.9e-05	6.13e-08	0.944	1.71e-05	0.124	1.54e-05	0.11	0.000249	0.00772	1.26e-09	3.19e-09	1.2e-06	1.26e-08	2.28e-08	5.9e-08	0.000137	2.58e-07	0.948	2.42e-05	0.135	4.23e-05	0.19	0.000528	FALSE	TRUE	TRUE
P11172	UMPS	-0.364	-4.18	-1.06	-0.601	-0.515	-3.82	-0.696	-0.238	-0.151	3.12	3.58	3.66	0.458	0.545	0.0869	0.275	9.39e-09	0.00569	0.0825	0.131	2.75e-08	0.0487	0.47	0.644	2.81e-07	5.84e-08	4.42e-08	0.176	0.112	0.79	0.349	1.62e-08	0.00879	0.112	0.168	4.93e-08	0.07	0.562	0.692	5.49e-07	1.08e-07	9.32e-08	0.22	0.193	0.82	FALSE	TRUE	TRUE
P11177	PDHB	0.0175	-2.89	-2.27	-1.28	-2.27	-2.91	-2.28	-1.29	-2.28	0.627	1.62	0.626	0.989	-0.00109	-0.99	0.931	2.35e-09	4.29e-08	2.28e-05	4.27e-08	2.19e-09	3.92e-08	1.99e-05	3.9e-08	0.00732	1.94e-06	0.0074	0.000247	0.996	0.000245	0.947	4.34e-09	1.55e-07	6.1e-05	1.83e-07	4.55e-09	1.8e-07	7.42e-05	1.72e-07	0.0088	3.01e-06	0.00887	0.000546	0.997	0.000523	FALSE	TRUE	TRUE
P11216	PYGB	-0.479	-4.02	-0.334	-0.396	-0.0594	-3.55	0.145	0.0826	0.419	3.69	3.63	3.97	-0.062	0.275	0.336	0.133	4.07e-08	0.282	0.207	0.889	1.46e-07	0.634	0.784	0.337	9.78e-08	1.16e-07	1.48e-06	0.837	0.524	0.437	0.187	6.57e-08	0.328	0.256	0.908	2.43e-07	0.69	0.836	0.395	2.02e-07	2.06e-07	2.62e-06	0.864	0.633	0.491	FALSE	TRUE	FALSE
P11233	RALA	NA	NA	NA	NA	NA	-4.94	-4.65	-2.42	-4.21	0.286	2.52	0.724	2.24	0.438	-1.8	NA	NA	NA	NA	NA	2.89e-10	5.11e-10	2.46e-07	1.31e-09	0.128	5.84e-08	0.00189	1.78e-07	0.0292	1.3e-06	NA	NA	NA	NA	NA	6.81e-10	3.72e-09	1.44e-06	8.16e-09	0.14	1.08e-07	0.00239	7.46e-07	0.066	4.41e-06	FALSE	FALSE	FALSE
P11279	LAMP1	-0.633	-5	-4.13	-2.24	-3.76	-4.37	-3.5	-1.61	-3.12	0.873	2.76	1.24	1.89	0.371	-1.52	0.00475	1.31e-12	1.43e-11	2.43e-08	4.61e-11	7.11e-12	1.12e-10	1.07e-06	4.44e-10	0.000433	1.99e-09	1.61e-05	1.75e-07	0.0669	2e-06	0.01	3.73e-12	1.15e-10	1.22e-07	3.75e-10	2.11e-11	9.42e-10	5.36e-06	3.1e-09	0.000584	4.45e-09	2.53e-05	7.32e-07	0.129	6.56e-06	FALSE	TRUE	TRUE
P11310	ACADM	NA	NA	NA	NA	NA	NA	NA	NA	NA	2.04	3.56	0.99	1.52	-1.05	-2.57	NA	NA	NA	NA	NA	NA	NA	NA	NA	1.3e-08	4.25e-10	2.99e-06	2.74e-07	1.96e-06	5.15e-09	NA	NA	NA	NA	NA	NA	NA	NA	NA	2.99e-08	1.05e-09	5.12e-06	1.09e-06	2.14e-05	3.09e-08	FALSE	FALSE	FALSE
P11387	TOP1	-0.212	0.886	-0.959	-0.373	-0.714	1.1	-0.747	-0.161	-0.503	-1.84	-1.26	-1.6	0.586	0.245	-0.342	3.04e-07	7.64e-15	2.81e-15	3.73e-10	1.15e-13	5.09e-16	6.52e-14	5.93e-06	9.33e-12	7.03e-19	8.97e-17	4.28e-18	1.38e-12	5.79e-08	1.09e-09	2.22e-06	3.31e-14	6.42e-14	3.24e-09	1.79e-12	3.65e-15	1.36e-12	2.49e-05	1.04e-10	2.04e-17	8.61e-16	7.51e-17	2.67e-11	1.16e-06	7.78e-09	FALSE	FALSE	FALSE
P11388	TOP2A	-0.273	-0.0903	-1.46	-0.61	-1.24	0.182	-1.19	-0.338	-0.964	-1.37	-0.52	-1.15	0.852	0.226	-0.626	2.09e-08	0.00143	1.76e-17	1.09e-12	1.48e-16	2.01e-06	2.41e-16	1.63e-09	3.46e-15	3.95e-17	8.04e-12	3.86e-16	1.63e-14	1.85e-07	7.86e-13	2.27e-07	0.00163	8.21e-16	2.17e-11	5.12e-15	2.95e-06	1.05e-14	1.8e-08	1.06e-13	5.15e-16	2.59e-11	3.49e-15	6.7e-13	3.01e-06	1.67e-11	FALSE	FALSE	TRUE
P11413	G6PD	-0.552	-5.17	-0.553	-0.581	-0.105	-4.62	-0.00092	-0.0288	0.447	4.62	4.59	5.07	-0.0278	0.448	0.476	0.000672	5.35e-15	0.000663	0.000443	0.411	2.22e-14	0.994	0.82	0.00325	2.23e-14	2.41e-14	6.94e-15	0.825	0.00321	0.0021	0.00176	2.39e-14	0.0012	0.000925	0.47	1.05e-13	0.995	0.863	0.00577	1.35e-13	1.23e-13	4.47e-14	0.852	0.0104	0.00372	FALSE	TRUE	FALSE
P11441	UBL4A	-0.235	-1.44	0.156	0.114	0.235	-1.2	0.391	0.349	0.47	1.59	1.55	1.67	-0.042	0.0795	0.122	0.0407	1.06e-08	0.154	0.288	0.0404	2.23e-08	0.00114	0.00256	0.000261	9.61e-10	1.3e-09	5.53e-10	0.654	0.401	0.209	0.0672	1.83e-08	0.19	0.344	0.0574	4.02e-08	0.00218	0.00601	0.000558	2.58e-09	2.99e-09	1.52e-09	0.696	0.518	0.254	FALSE	TRUE	FALSE
P11586	MTHFD1	-0.464	-4.76	-2.22	-1.06	-1.88	-4.29	-1.76	-0.596	-1.42	2.53	3.7	2.87	1.16	0.337	-0.825	5.12e-08	1.26e-20	1.97e-16	2.21e-12	1.58e-15	4.65e-20	3.82e-15	2.65e-09	5.59e-14	3.73e-17	3.1e-19	7.66e-18	7.01e-13	1.9e-06	4.98e-11	4.72e-07	4.02e-19	6.15e-15	3.94e-11	4.06e-14	1.68e-18	1.21e-13	2.7e-08	1.14e-12	4.98e-16	7.7e-18	1.19e-16	1.56e-11	2.1e-05	5.56e-10	FALSE	TRUE	TRUE
P11802	CDK4	-0.371	-3.97	-0.0675	0.268	0.724	-3.6	0.303	0.639	1.09	3.9	4.24	4.69	0.336	0.791	0.456	0.0428	5.45e-12	0.689	0.128	0.000767	1.84e-11	0.0891	0.00198	1.79e-05	6.75e-12	2.41e-12	6.72e-13	0.0629	0.000368	0.0164	0.0701	1.41e-11	0.73	0.166	0.00148	5.2e-11	0.121	0.00477	4.67e-05	2.51e-11	8.47e-12	2.91e-12	0.087	0.00169	0.025	FALSE	TRUE	FALSE
P12004	PCNA	-0.619	-3.69	0.258	0.172	0.0981	-3.07	0.877	0.791	0.717	3.95	3.86	3.78	-0.086	-0.16	-0.0742	4.68e-10	8.37e-20	1.03e-05	0.000459	0.0199	8.62e-19	6.31e-12	2.28e-11	7.69e-11	3.54e-20	4.69e-20	6e-20	0.0366	0.000829	0.0656	9.55e-09	1.77e-18	2.46e-05	0.000957	0.03	1.56e-17	7.61e-11	4.62e-10	6.52e-10	2.05e-18	1.9e-18	2.65e-18	0.0535	0.00337	0.0894	FALSE	TRUE	FALSE
P12035	KRT3	NA	-0.842	0.818	0.667	0.939	NA	NA	NA	NA	1.66	1.51	1.78	-0.151	0.122	0.272	NA	0.000676	0.00395	0.00397	0.000358	NA	NA	NA	NA	4.62e-05	1.91e-05	3.18e-06	0.456	0.521	0.0985	NA	0.000784	0.00628	0.007	0.000726	NA	NA	NA	NA	6.86e-05	2.67e-05	5.43e-06	0.511	0.63	0.129	FALSE	FALSE	FALSE
P12081	HARS1	-0.742	-4.21	-0.313	-0.325	0.222	-3.47	0.429	0.417	0.964	3.89	3.88	4.43	-0.0117	0.535	0.547	1.37e-07	6.77e-17	0.000767	0.00057	0.00828	7.89e-16	4.72e-05	6.14e-05	6.35e-09	1.8e-16	1.87e-16	3.52e-17	0.872	5.03e-06	4.01e-06	1.1e-06	4.99e-16	0.00137	0.00117	0.0134	5.42e-15	0.000113	0.000207	3.34e-08	1.92e-15	1.68e-15	4.26e-16	0.895	4.8e-05	1.22e-05	FALSE	TRUE	FALSE
P12109	COL6A1	-0.896	-4.01	-3.06	-1.17	-2.81	-3.11	-2.16	-0.275	-1.92	0.953	2.84	1.2	1.89	0.244	-1.64	0.00012	8.41e-11	1.13e-09	7.95e-06	2.5e-09	9.98e-11	3.28e-09	0.0301	1.02e-08	2.32e-06	8.31e-11	2.95e-07	4.13e-09	0.0312	1.53e-08	0.000394	1.87e-10	5.74e-09	2.34e-05	1.37e-08	2.55e-10	1.91e-08	0.0535	5.16e-08	4.03e-06	2.29e-10	5.69e-07	2.56e-08	0.0699	8.05e-08	FALSE	TRUE	TRUE
P12110	COL6A2	NA	NA	NA	NA	NA	-4.09	-2.94	-1.11	-2.83	1.14	2.98	1.25	1.83	0.111	-1.72	NA	NA	NA	NA	NA	1.1e-08	3.05e-07	0.00152	4.46e-07	0.00125	2.74e-07	0.000632	2.73e-05	0.682	4.74e-05	NA	NA	NA	NA	NA	2.06e-08	1.13e-06	0.00377	1.59e-06	0.00161	4.65e-07	0.000838	7.17e-05	0.767	0.000116	FALSE	FALSE	FALSE
P12111	COL6A3	-0.649	-3.5	-2.95	-1.22	-2.77	-2.85	-2.3	-0.567	-2.12	0.55	2.28	0.728	1.73	0.177	-1.56	9.65e-05	3.32e-13	2.82e-12	1.3e-07	6.11e-12	4.31e-12	6.16e-11	0.000319	1.65e-10	0.000412	6.75e-11	3.22e-05	1.96e-09	0.152	7.14e-09	0.000327	1.04e-12	2.69e-11	5.54e-07	6.14e-11	1.34e-11	5.54e-10	0.000915	1.29e-09	0.000559	1.89e-10	4.88e-05	1.34e-08	0.245	4.12e-08	FALSE	TRUE	TRUE
P12235	SLC25A4	-0.336	-3.26	-4.4	-2.38	-4.03	-2.93	-4.06	-2.05	-3.7	-1.13	0.879	-0.771	2.01	0.361	-1.65	0.0692	8.66e-11	2.15e-12	3.95e-09	6.26e-12	3.29e-10	5.79e-12	2.41e-08	1.85e-11	1.68e-05	0.000187	0.000576	2.99e-08	0.0529	2.94e-07	0.107	1.92e-10	2.1e-11	2.5e-08	6.27e-11	7.68e-10	7.12e-11	1.8e-07	1.9e-10	2.65e-05	0.000239	0.000767	1.47e-07	0.107	1.16e-06	FALSE	TRUE	TRUE
P12268	IMPDH2	-0.399	-4.91	-0.575	-0.566	0.141	-4.51	-0.176	-0.167	0.54	4.33	4.34	5.05	0.00899	0.716	0.707	2.59e-05	1.77e-18	5.44e-07	6.48e-07	0.0418	5.21e-18	0.0147	0.0194	1.08e-06	8.62e-18	8.4e-18	1.24e-18	0.888	4.42e-08	5.12e-08	0.000104	2.08e-17	1.57e-06	2.38e-06	0.0593	6.97e-17	0.0235	0.0361	3.56e-06	1.5e-16	1.12e-16	2.88e-17	0.908	9.23e-07	2.37e-07	FALSE	TRUE	FALSE
P12270	TPR	-0.187	-1	0.197	-0.0342	0.292	-0.817	0.384	0.153	0.479	1.2	0.97	1.3	-0.231	0.0955	0.326	4.06e-07	4.5e-16	2.27e-07	0.107	2.17e-09	6.09e-15	7.82e-11	3.71e-06	4.96e-12	4.67e-17	6.98e-16	1.77e-17	3.56e-08	0.000346	5.66e-10	2.83e-06	2.6e-15	6.98e-07	0.141	1.2e-08	3.34e-14	6.86e-10	1.62e-05	5.95e-11	5.95e-16	5.21e-15	2.35e-16	1.72e-07	0.00161	4.42e-09	FALSE	TRUE	FALSE
P12273	PIP	-0.878	NA	1.36	1.17	0.307	NA	2.24	2.05	1.18	NA	NA	NA	-0.191	-1.05	-0.861	0.0148	NA	0.00229	0.00296	0.326	NA	5.86e-05	4.89e-05	0.0027	NA	NA	NA	0.577	0.0103	0.0163	0.0276	NA	0.0038	0.00535	0.383	NA	0.000138	0.000167	0.00485	NA	NA	NA	0.626	0.0277	0.0248	FALSE	FALSE	TRUE
P12429	ANXA3	-0.603	-5.17	-0.891	-0.732	-0.264	-4.57	-0.289	-0.129	0.338	4.28	4.44	4.91	0.159	0.627	0.468	3.04e-08	6.76e-20	2.75e-10	3.01e-09	0.000184	3.26e-19	8.19e-05	0.0248	1.75e-05	7.46e-19	4.69e-19	1.32e-19	0.00806	1.9e-08	5.56e-07	3.13e-07	1.49e-18	1.55e-09	1.95e-08	0.000391	7.1e-18	0.000188	0.0451	4.57e-05	2.11e-17	1.09e-17	4.91e-18	0.0133	4.73e-07	2.04e-06	FALSE	TRUE	FALSE
P12814	ACTN1	-0.266	-2.09	-0.57	0.0714	-0.703	-1.82	-0.303	0.338	-0.437	1.52	2.16	1.38	0.641	-0.133	-0.774	1.52e-08	1.02e-19	1.37e-12	0.00517	9.79e-14	5.78e-19	3.22e-09	8.78e-10	3.76e-11	5.84e-18	6.66e-20	1.88e-17	3.12e-13	3.06e-05	2.9e-14	1.76e-07	2.08e-18	1.43e-11	0.0089	1.56e-12	1.14e-17	1.88e-08	1.03e-08	3.5e-10	1.14e-16	2.46e-18	2.46e-16	8.15e-12	0.000216	1e-12	FALSE	TRUE	FALSE
P12882	MYH1	NA	NA	NA	NA	NA	NA	NA	NA	NA	2.45	NA	3.26	NA	0.809	NA	NA	NA	NA	NA	NA	NA	NA	NA	NA	4.52e-05	NA	7.31e-06	NA	0.0191	NA	NA	NA	NA	NA	NA	NA	NA	NA	NA	6.72e-05	NA	1.2e-05	NA	0.0466	NA	FALSE	FALSE	FALSE
P12931	SRC	0.148	-2.5	-1.63	-0.627	-1.39	-2.65	-1.78	-0.775	-1.54	0.87	1.88	1.11	1.01	0.243	-0.764	0.551	1.45e-07	1.49e-05	0.0225	7.19e-05	7.46e-08	6.11e-06	0.00704	2.71e-05	0.00333	3.52e-06	0.000521	0.00115	0.334	0.00763	0.626	2.22e-07	3.45e-05	0.0342	0.000162	1.28e-07	1.73e-05	0.0146	6.85e-05	0.00412	5.3e-06	0.000697	0.00224	0.452	0.0123	FALSE	TRUE	TRUE
P12955	PEPD	-0.43	-5.11	-0.0486	-0.0447	0.242	-4.68	0.382	0.385	0.672	5.07	5.07	5.36	0.00397	0.29	0.286	0.482	3.69e-06	0.942	0.941	0.691	2.94e-06	0.532	0.482	0.231	4.04e-06	1.38e-06	8.06e-07	0.995	0.633	0.599	0.561	4.98e-06	0.951	0.952	0.734	4.24e-06	0.595	0.574	0.283	6.82e-06	2.18e-06	1.48e-06	0.996	0.726	0.647	FALSE	TRUE	FALSE
P12956	XRCC6	-0.356	-1.7	-0.857	-0.385	-0.606	-1.34	-0.5	-0.0285	-0.25	0.842	1.31	1.09	0.472	0.251	-0.221	0.0775	5.88e-07	0.00051	0.059	0.00628	7.47e-06	0.0186	0.88	0.201	0.000588	9.32e-06	5.83e-05	0.0248	0.2	0.254	0.118	8.49e-07	0.000939	0.0821	0.0103	1.03e-05	0.0289	0.911	0.25	0.000784	1.35e-05	8.61e-05	0.0373	0.306	0.303	FALSE	TRUE	FALSE
P13010	XRCC5	NA	-3.96	-1.17	-1.49	-1.01	NA	NA	NA	NA	2.79	2.47	2.96	-0.315	0.168	0.483	NA	2.36e-06	0.00369	0.0049	0.0121	NA	NA	NA	NA	1.12e-05	0.000208	1.57e-05	0.388	0.553	0.225	NA	3.24e-06	0.00588	0.00847	0.0189	NA	NA	NA	NA	1.79e-05	0.000265	2.47e-05	0.444	0.659	0.272	FALSE	TRUE	TRUE
P13056	NR2C1	0.231	-3.9	-0.968	0.804	-0.245	-4.13	-1.2	0.573	-0.476	2.93	4.7	3.65	1.77	0.723	-1.05	0.702	0.000319	0.16	0.295	0.702	2.64e-05	0.0355	0.356	0.334	0.00043	0.000102	0.000114	0.0244	0.194	0.133	0.762	0.000377	0.197	0.351	0.744	3.49e-05	0.0524	0.443	0.392	0.000581	0.000134	0.000163	0.0368	0.298	0.169	FALSE	TRUE	FALSE
P13497	BMP1	-0.403	NA	-1.03	-0.421	-0.946	NA	-0.628	-0.0181	-0.544	NA	NA	NA	0.61	0.0842	-0.526	0.0987	NA	0.00078	0.0862	0.00144	NA	0.017	0.937	0.0332	NA	NA	NA	0.0196	0.713	0.0382	0.145	NA	0.0014	0.116	0.00266	NA	0.0267	0.953	0.0488	NA	NA	NA	0.0302	0.792	0.0545	FALSE	FALSE	TRUE
P13591	NCAM1	0.25	-3.43	-3.59	-2.25	-3.2	-3.68	-3.84	-2.5	-3.45	-0.158	1.18	0.23	1.34	0.387	-0.951	0.318	3.45e-09	2.01e-09	4.71e-07	7.91e-09	1.48e-09	8.89e-10	1.43e-07	3.21e-09	0.525	0.000309	0.359	0.000101	0.133	0.00174	0.393	6.25e-09	9.62e-09	1.78e-06	3.9e-08	3.15e-09	6.18e-09	8.94e-07	1.78e-08	0.543	0.000389	0.378	0.000239	0.22	0.00313	FALSE	TRUE	TRUE
P13631	RARG	NA	NA	NA	NA	NA	NA	NA	NA	NA	NA	1.03	1.31	NA	NA	0.274	NA	NA	NA	NA	NA	NA	NA	NA	NA	NA	0.0019	0.000682	NA	NA	0.194	NA	NA	NA	NA	NA	NA	NA	NA	NA	NA	0.00225	0.0009	NA	NA	0.239	FALSE	FALSE	FALSE
P13639	EEF2	0.0737	-2.69	0.314	0.0955	0.413	-2.76	0.24	0.0218	0.339	3	2.78	3.1	-0.219	0.0987	0.317	0.00231	1.36e-21	7.35e-10	0.000299	2.56e-11	9.66e-22	1.82e-08	0.282	2.89e-10	3.34e-22	8.74e-22	2.22e-22	5.54e-08	0.000225	6.5e-10	0.00533	8.68e-20	3.84e-09	0.000648	2.18e-10	1.02e-19	8.9e-08	0.366	2.1e-09	6.93e-20	9.69e-20	4.04e-20	2.58e-07	0.00113	4.93e-09	FALSE	TRUE	FALSE
P13645	KRT10	0.272	0.509	1.04	1.09	1.16	0.237	0.764	0.814	0.892	0.527	0.577	0.655	0.05	0.128	0.0779	3.51e-09	1.59e-12	2.06e-16	1.14e-16	4.72e-17	1.86e-08	9.77e-15	4.39e-15	1.38e-15	1.04e-12	3.34e-13	6.8e-14	0.022	1.7e-05	0.00139	5.3e-08	4.47e-12	6.32e-15	1.44e-14	1.95e-15	3.4e-08	2.52e-13	4.46e-13	4.93e-14	4.51e-12	1.35e-12	3.53e-13	0.0335	0.000133	0.00256	FALSE	FALSE	TRUE
P13646	KRT13	-1.31	-0.721	-0.171	1.17	-1.96	0.59	1.14	2.48	-0.648	0.55	1.89	-1.24	1.34	-1.79	-3.13	0.0174	0.155	0.725	0.0475	0.00146	0.238	0.0337	0.000561	0.197	0.269	0.00397	0.0231	0.0265	0.00277	7.88e-05	0.0318	0.161	0.763	0.0672	0.00269	0.247	0.0498	0.00154	0.246	0.287	0.00461	0.0267	0.0397	0.00921	0.000185	FALSE	FALSE	FALSE
P13667	PDIA4	-0.57	-4.33	-1.33	-0.376	-2.13	-3.76	-0.756	0.194	-1.56	3.01	3.96	2.21	0.95	-0.8	-1.75	0.000436	3.86e-14	7.74e-08	0.00858	2.74e-10	2.28e-13	3.34e-05	0.134	1.19e-08	3.79e-12	1.21e-13	1.75e-10	3.21e-06	1.91e-05	2.92e-09	0.00121	1.42e-13	2.64e-07	0.0141	1.91e-09	8.84e-13	8.22e-05	0.195	5.91e-08	1.48e-11	5.44e-13	5.15e-10	1.01e-05	0.000147	1.86e-08	FALSE	TRUE	TRUE
P13674	P4HA1	-0.227	-1.51	-1.45	-0.974	-1.29	-1.28	-1.22	-0.747	-1.07	0.0587	0.535	0.214	0.476	0.156	-0.321	2.26e-06	2.15e-16	3.55e-16	5.42e-14	1.49e-15	1.68e-15	3.04e-15	1.51e-12	1.7e-14	0.0566	9.55e-11	4.13e-06	3.97e-10	0.0001	4.52e-08	1.2e-05	1.37e-15	1.02e-14	1.66e-12	3.9e-14	1.08e-14	9.98e-14	4.72e-11	4.24e-13	0.0636	2.6e-10	6.95e-06	3.39e-09	0.000568	2.12e-07	FALSE	TRUE	TRUE
P13693	TPT1	-0.568	-5.51	-0.458	0.161	0.514	-4.94	0.109	0.729	1.08	5.05	5.67	6.03	0.62	0.972	0.352	6.87e-06	6.73e-18	5.83e-05	0.0591	1.91e-05	2.67e-17	0.184	4.56e-07	4.63e-09	2.02e-17	4.67e-18	2.17e-18	2.72e-06	1.65e-08	0.000599	3.17e-05	6.46e-17	0.000124	0.0822	4.77e-05	2.82e-16	0.233	2.5e-06	2.52e-08	2.98e-16	6.84e-17	4.39e-17	8.67e-06	4.23e-07	0.00118	FALSE	TRUE	FALSE
P13716	ALAD	-0.806	-4.6	-0.164	-0.259	0.104	-3.79	0.642	0.547	0.911	4.43	4.34	4.7	-0.0956	0.268	0.364	0.000213	5.01e-13	0.318	0.124	0.52	5.59e-12	0.00137	0.00428	7.01e-05	7.9e-13	1.04e-12	3.78e-13	0.555	0.113	0.0385	0.000653	1.53e-12	0.366	0.161	0.576	1.7e-11	0.00261	0.00945	0.000165	3.5e-12	3.86e-12	1.72e-12	0.606	0.194	0.0548	FALSE	TRUE	FALSE
P13797	PLS3	-0.307	-4.82	-0.538	-0.308	-0.193	-4.52	-0.231	-0.00123	0.113	4.29	4.52	4.63	0.23	0.344	0.114	2.98e-06	5.4e-21	4.82e-09	2.85e-06	0.000268	1.24e-20	5.25e-05	0.975	0.0123	2.43e-20	1.25e-20	9.09e-21	5.53e-05	8.4e-07	0.0116	1.54e-05	2.02e-19	2.12e-08	9.16e-06	0.000557	7.28e-19	0.000124	0.984	0.0196	1.62e-18	7.72e-19	6.09e-19	0.000137	1.03e-05	0.0181	FALSE	TRUE	FALSE
P13798	APEH	0.362	-2.18	1.1	0.903	0.421	-2.54	0.738	0.541	0.0591	3.28	3.09	2.6	-0.197	-0.679	-0.482	0.00987	1.66e-10	5.48e-07	4.68e-06	0.00384	2.5e-11	3.64e-05	0.000591	0.629	1.04e-12	2.26e-12	1.88e-11	0.124	8.08e-05	0.00146	0.0191	3.53e-10	1.58e-06	1.45e-05	0.00657	6.91e-11	8.9e-05	0.00161	0.677	4.51e-12	7.98e-12	6.35e-11	0.161	0.00048	0.00267	FALSE	TRUE	TRUE
P13804	ETFA	NA	NA	NA	NA	NA	-3.52	-1.31	0.0462	-1.45	2.21	3.57	2.08	1.36	-0.133	-1.49	NA	NA	NA	NA	NA	7.11e-08	2.57e-05	0.723	1.09e-05	2.66e-07	6.6e-08	2.01e-07	2.12e-05	0.151	9.11e-06	NA	NA	NA	NA	NA	1.22e-07	6.45e-05	0.788	2.94e-05	5.21e-07	1.21e-07	3.94e-07	5.67e-05	0.244	2.56e-05	FALSE	FALSE	FALSE
P13807	GYS1	0.773	2.81	1.1	1.02	0.534	2.04	0.33	0.243	-0.239	-1.71	-1.79	-2.28	-0.0869	-0.568	-0.481	8.98e-12	7.58e-19	1.05e-13	2.95e-13	8.51e-10	4.48e-17	2.53e-07	7.14e-06	8.45e-06	4.19e-16	2.23e-16	1.1e-17	0.0223	3.98e-10	2.98e-09	4.05e-10	1e-17	1.49e-12	7.23e-12	5.17e-09	4.41e-16	9.57e-07	2.95e-05	2.33e-05	3.99e-15	1.94e-15	1.56e-16	0.0339	2.62e-08	1.89e-08	FALSE	TRUE	TRUE
P13861	PRKAR2A	-0.577	-2.98	-1.71	-0.845	-1.71	-2.4	-1.13	-0.269	-1.13	1.26	2.13	1.27	0.866	0.00543	-0.86	1.04e-07	1.66e-16	1.79e-13	1.12e-09	1.87e-13	2.53e-15	3.04e-11	0.000275	3.23e-11	7.85e-12	1.13e-14	7.44e-12	8.39e-10	0.922	9.06e-10	8.72e-07	1.09e-15	2.4e-12	8.25e-09	2.69e-12	1.56e-14	3.01e-10	0.000806	3.03e-10	2.87e-11	6.19e-14	2.65e-11	6.4e-09	0.945	6.67e-09	FALSE	TRUE	TRUE
P13928	ANXA8	-1.48	-6.32	-0.956	-0.948	-0.629	-4.85	0.522	0.53	0.848	5.37	5.38	5.7	0.00801	0.326	0.318	8.79e-05	5.3e-12	0.00306	0.00324	0.0324	1.43e-10	0.0684	0.0648	0.00666	4.05e-11	3.98e-11	1.95e-11	0.976	0.235	0.246	0.0003	1.38e-11	0.00494	0.00582	0.0469	3.55e-10	0.0948	0.105	0.0111	1.33e-10	1.16e-10	6.56e-11	0.981	0.345	0.295	TRUE	TRUE	FALSE
P13929	ENO3	-0.436	-4.85	-0.0888	-0.284	0.583	-4.41	0.347	0.152	1.02	4.76	4.57	5.43	-0.195	0.671	0.867	2.89e-06	4.24e-19	0.131	0.000196	1.14e-07	1.4e-18	3.01e-05	0.0167	1.43e-10	5.36e-19	9.13e-19	1e-19	0.00368	2.18e-08	1.02e-09	1.5e-05	6.39e-18	0.163	0.000441	4.45e-07	2.27e-17	7.48e-05	0.0316	1.13e-09	1.62e-17	1.8e-17	3.9e-18	0.0065	5.29e-07	7.37e-09	FALSE	TRUE	FALSE
P13984	GTF2F2	-0.479	-2.41	-0.173	-1.27	0.00411	-1.93	0.306	-0.79	0.484	2.23	1.14	2.41	-1.1	0.177	1.27	8.36e-07	2.41e-15	0.00707	7.42e-12	0.941	3.97e-14	8.39e-05	2.5e-09	7.61e-07	6.18e-15	2.92e-11	2.35e-15	4.58e-11	0.00612	7.13e-12	5.18e-06	1.17e-14	0.0108	1.11e-10	0.951	1.78e-13	0.000192	2.55e-08	2.58e-06	4.37e-14	8.75e-11	1.75e-14	5.42e-10	0.0178	1.06e-10	FALSE	TRUE	FALSE
P14314	PRKCSH	-0.9	-4.04	-1.31	0.785	-1.24	-3.15	-0.406	1.68	-0.339	2.74	4.83	2.81	2.09	0.0673	-2.02	0.0215	3.28e-08	0.00228	0.04	0.0033	5.85e-07	0.259	0.000305	0.342	2.66e-06	3.99e-09	2.05e-06	4.23e-05	0.848	5.79e-05	0.038	5.34e-08	0.00378	0.0577	0.0057	9.07e-07	0.315	0.00088	0.401	4.59e-06	8.6e-09	3.57e-06	0.000107	0.893	0.00014	FALSE	TRUE	TRUE
P14324	FDPS	-0.43	-3.56	-0.281	0.0106	-0.00792	-3.13	0.149	0.44	0.422	3.28	3.57	3.55	0.292	0.273	-0.0185	0.000612	2.2e-14	0.0114	0.913	0.935	1.11e-13	0.143	0.000501	0.000712	6.2e-14	2.12e-14	2.26e-14	0.00923	0.0134	0.849	0.00163	8.57e-14	0.0169	0.929	0.946	4.61e-13	0.185	0.00139	0.00141	3.38e-13	1.09e-13	1.31e-13	0.0151	0.0344	0.87	FALSE	TRUE	FALSE
P14543	NID1	-0.305	-1.5	-0.773	-0.433	-0.668	-1.19	-0.469	-0.128	-0.364	0.725	1.07	0.831	0.341	0.105	-0.236	2.07e-05	1.42e-13	5.29e-10	4.94e-07	3.1e-09	2.45e-12	1.99e-07	0.0167	3.31e-06	1.15e-09	1.01e-11	2.2e-10	6.57e-06	0.042	0.000232	8.55e-05	4.78e-13	2.84e-09	1.86e-06	1.67e-08	7.94e-12	7.71e-07	0.0318	9.92e-06	3.04e-09	3.2e-11	6.36e-10	1.94e-05	0.0883	0.000496	FALSE	TRUE	FALSE
P14550	AKR1A1	-0.515	-5.4	-0.0691	-0.486	0.836	-4.88	0.445	0.0288	1.35	5.33	4.91	6.23	-0.417	0.905	1.32	0.0264	1.8e-12	0.742	0.0343	0.00136	6.28e-12	0.0492	0.89	1.94e-05	2.11e-12	5.83e-12	2.96e-13	0.0635	0.000734	2.41e-05	0.0456	5e-12	0.777	0.0503	0.00252	1.89e-11	0.0707	0.917	5.03e-05	8.53e-12	1.93e-11	1.38e-12	0.0877	0.00308	6.27e-05	FALSE	TRUE	FALSE
P14618	PKM	-0.428	-5.12	-0.232	-0.296	0.699	-4.69	0.196	0.132	1.13	4.89	4.82	5.82	-0.0636	0.931	0.995	4.87e-09	1.4e-22	5.08e-06	3.61e-07	1.21e-11	4.24e-22	2.9e-05	0.000953	3.04e-14	2.52e-22	2.98e-22	2.75e-23	0.0609	3.35e-13	1.46e-13	6.85e-08	1.65e-20	1.27e-05	1.4e-06	1.12e-10	6.01e-20	7.2e-05	0.00246	6.77e-13	6.31e-20	4.68e-20	1.07e-20	0.0846	8.83e-11	3.9e-12	FALSE	TRUE	FALSE
P14625	HSP90B1	-0.458	-2.88	-1.39	-0.555	-1.77	-2.42	-0.932	-0.0969	-1.31	1.49	2.33	1.11	0.835	-0.377	-1.21	4.29e-11	3.59e-21	3.73e-17	3.96e-12	1.78e-18	3.24e-20	5.88e-15	0.000881	8.01e-17	1.54e-17	5.44e-20	6.18e-16	2.35e-14	4.74e-10	2.12e-16	1.4e-09	1.62e-19	1.51e-15	6.55e-11	1.15e-16	1.27e-18	1.71e-13	0.00229	4.04e-15	2.38e-16	2.09e-18	5.24e-15	9.04e-13	2.98e-08	1.68e-14	FALSE	TRUE	TRUE
P14735	IDE	-0.883	-4.39	-0.724	-0.233	0.0806	-3.51	0.16	0.65	0.964	3.67	4.16	4.47	0.49	0.804	0.314	0.000155	1.78e-12	0.000842	0.186	0.637	2.92e-11	0.355	0.0019	6.93e-05	1.68e-11	3.52e-12	1.42e-12	0.0117	0.000354	0.0829	0.000493	4.96e-12	0.0015	0.232	0.685	7.98e-11	0.417	0.00458	0.000163	5.89e-11	1.2e-11	5.74e-12	0.0187	0.00164	0.11	FALSE	TRUE	FALSE
P14868	DARS	0.00696	-1.95	0.172	0.321	0.128	-1.96	0.165	0.314	0.121	2.12	2.27	2.08	0.149	-0.0438	-0.193	0.757	4.03e-19	3.47e-06	2.7e-09	6.8e-05	3.85e-19	5.38e-06	3.51e-09	0.000115	1.38e-19	5.84e-20	1.8e-19	1.52e-05	0.0687	9.84e-07	0.806	6.13e-18	8.94e-06	1.78e-08	0.000154	8.3e-18	1.54e-05	3.42e-08	0.000261	5.91e-18	2.22e-18	6.33e-18	4.18e-05	0.131	3.39e-06	FALSE	TRUE	FALSE
P14923	JUP	-0.505	-1.02	-0.836	-0.0769	-0.33	-0.52	-0.331	0.428	0.174	0.189	0.948	0.694	0.759	0.506	-0.254	2.39e-10	3.49e-14	4.52e-13	0.0183	3.86e-08	1.65e-10	3.73e-08	1.79e-09	4e-05	1.81e-05	9.33e-14	4.61e-12	1.51e-12	2.33e-10	7.94e-07	5.94e-09	1.3e-13	5.37e-12	0.0283	1.67e-07	4.04e-10	1.72e-07	1.96e-08	9.8e-05	2.83e-05	4.25e-13	1.7e-11	2.91e-11	1.71e-08	2.81e-06	FALSE	TRUE	FALSE
P15104	GLUL	NA	NA	NA	NA	NA	NA	NA	NA	NA	NA	NA	4.15	NA	NA	NA	NA	NA	NA	NA	NA	NA	NA	NA	NA	NA	NA	1.22e-06	NA	NA	NA	NA	NA	NA	NA	NA	NA	NA	NA	NA	NA	NA	2.18e-06	NA	NA	NA	FALSE	FALSE	FALSE
P15121	AKR1B1	-0.519	-5.11	0.125	-0.452	1.22	-4.59	0.644	0.0668	1.74	5.24	4.66	6.33	-0.577	1.09	1.67	3.82e-07	1.92e-19	0.0399	1.75e-06	1.39e-11	7.46e-19	3.2e-08	0.243	1.64e-13	1.41e-19	6.21e-19	1.27e-20	1.14e-07	5.3e-11	2.69e-13	2.69e-06	3.36e-18	0.0539	5.88e-06	1.27e-10	1.37e-17	1.5e-07	0.324	2.94e-12	5.98e-18	1.31e-17	7.83e-19	4.98e-07	5.83e-09	6.63e-12	FALSE	TRUE	FALSE
P15144	ANPEP	NA	NA	NA	NA	NA	NA	NA	NA	NA	-0.108	3.86	0.421	3.97	0.529	-3.44	NA	NA	NA	NA	NA	NA	NA	NA	NA	0.394	1.21e-07	0.00994	1.01e-07	0.00323	2.6e-07	NA	NA	NA	NA	NA	NA	NA	NA	NA	0.414	2.14e-07	0.0118	4.45e-07	0.0105	1.04e-06	FALSE	FALSE	FALSE
P15170	GSPT1	-0.805	-4.95	-0.671	-0.837	0.235	-4.15	0.133	-0.032	1.04	4.28	4.11	5.19	-0.165	0.907	1.07	2.04e-05	8.41e-15	0.000116	1.38e-05	0.0778	7.86e-14	0.298	0.798	1.38e-06	5.28e-14	8.67e-14	4.68e-15	0.202	6e-06	9.92e-07	8.46e-05	3.59e-14	0.000234	3.87e-05	0.104	3.39e-13	0.358	0.847	4.44e-06	2.92e-13	3.97e-13	3.14e-14	0.249	5.58e-05	3.42e-06	FALSE	TRUE	FALSE
P15291	B4GALT1	NA	-2.07	-0.702	0.00774	-0.599	NA	NA	NA	NA	1.37	2.08	1.47	0.71	0.103	-0.607	NA	1.7e-06	0.00429	0.967	0.0102	NA	NA	NA	NA	2.96e-06	9.14e-08	1.63e-06	0.00044	0.447	0.00126	NA	2.36e-06	0.00677	0.971	0.0162	NA	NA	NA	NA	5.09e-06	1.64e-07	2.87e-06	0.000932	0.561	0.00234	FALSE	TRUE	FALSE
P15311	EZR	-0.395	-4.71	-0.513	-0.488	0.0648	-4.31	-0.119	-0.0932	0.46	4.19	4.22	4.77	0.0255	0.578	0.553	0.000314	7.93e-17	2.75e-05	4.53e-05	0.437	2.41e-16	0.166	0.269	8e-05	3.43e-16	3.17e-16	6.67e-17	0.757	8.26e-06	1.31e-05	0.000913	5.73e-16	6.09e-05	0.000114	0.496	1.89e-15	0.211	0.353	0.000186	3.33e-15	2.63e-15	7.53e-16	0.792	7.2e-05	3.61e-05	FALSE	TRUE	FALSE
P15374	UCHL3	NA	NA	NA	NA	NA	NA	NA	NA	NA	NA	3.35	NA	NA	NA	NA	NA	NA	NA	NA	NA	NA	NA	NA	NA	NA	2.18e-06	NA	NA	NA	NA	NA	NA	NA	NA	NA	NA	NA	NA	NA	NA	3.35e-06	NA	NA	NA	NA	FALSE	FALSE	FALSE
P15407	FOSL1	-1.12	1.27	-1.1	-1.38	-0.855	2.39	0.0172	-0.266	0.264	-2.37	-2.66	-2.13	-0.283	0.247	0.53	6.38e-09	1.38e-09	7.67e-09	4.87e-10	1.49e-07	5.61e-13	0.839	0.00701	0.00727	6.15e-13	1.5e-13	2.43e-12	0.00472	0.0108	2.59e-05	8.55e-08	2.63e-09	3.23e-08	4.05e-09	5.65e-07	2.02e-12	0.868	0.0146	0.012	2.79e-12	6.49e-13	9.39e-12	0.00815	0.0288	6.69e-05	TRUE	TRUE	TRUE
P15408	FOSL2	-0.953	-1.31	-1.01	-1.55	-0.378	-0.356	-0.0549	-0.597	0.575	0.301	-0.241	0.931	-0.542	0.63	1.17	0.00459	0.000429	0.00315	9.65e-05	0.197	0.223	0.846	0.0515	0.0593	0.298	0.402	0.00533	0.0733	0.0414	0.00105	0.00973	0.000504	0.00509	0.00023	0.242	0.232	0.874	0.0856	0.0829	0.317	0.415	0.00646	0.0999	0.0872	0.00197	FALSE	TRUE	TRUE
P15531	NME1	-0.549	-5.63	-0.298	-0.491	0.365	-5.08	0.251	0.0588	0.914	5.33	5.14	6	-0.193	0.663	0.855	2.48e-10	4.41e-23	3.47e-07	9.86e-10	3.41e-08	1.63e-22	2.29e-06	0.0813	4.45e-13	8.8e-23	1.4e-22	1.99e-23	3.56e-05	2.45e-11	1.02e-12	6.07e-09	6.77e-21	1.04e-06	7.48e-09	1.49e-07	2.99e-20	7.09e-06	0.127	7.05e-12	2.67e-20	2.94e-20	9.64e-21	9.14e-05	3.29e-09	2.07e-11	FALSE	TRUE	FALSE
P15880	RPS2	0.294	2.5	0.528	0.225	0.416	2.21	0.234	-0.0688	0.122	-1.97	-2.28	-2.08	-0.303	-0.112	0.191	5.1e-08	1.31e-19	4.28e-11	1.05e-06	7.97e-10	6.39e-19	6.64e-07	0.0201	0.000416	2.66e-18	4.33e-19	1.32e-18	3.5e-08	0.000864	6.01e-06	4.72e-07	2.47e-18	3.04e-10	3.69e-06	4.88e-09	1.22e-17	2.31e-06	0.0373	0.000857	5.98e-17	1.01e-17	3.05e-17	1.69e-07	0.00349	1.75e-05	FALSE	TRUE	FALSE
P15924	DSP	-0.489	0.319	0.229	0.338	0.758	0.808	0.718	0.827	1.25	-0.0903	0.0194	0.439	0.11	0.53	0.42	1.64e-11	3.05e-09	1.53e-07	1.5e-09	6.72e-14	3.03e-14	1.35e-13	2.25e-14	1.25e-16	0.00138	0.398	6.13e-11	0.000285	6.04e-12	1.07e-10	6.6e-10	5.54e-09	4.9e-07	1.06e-08	1.14e-12	1.39e-13	2.52e-12	1.35e-12	5.76e-15	0.00177	0.411	1.91e-10	0.000625	9.95e-10	1.05e-09	FALSE	FALSE	FALSE
P15927	RPA2	-0.314	0.727	0.171	-1.43	-0.244	1.04	0.485	-1.12	0.0704	-0.556	-2.16	-0.971	-1.6	-0.415	1.19	0.0284	7.79e-05	0.203	5.58e-08	0.0779	2.03e-06	0.00224	9.31e-07	0.59	0.000797	4.13e-10	4.29e-06	1.49e-08	0.00639	4.72e-07	0.0488	9.57e-05	0.244	2.56e-07	0.104	2.98e-06	0.00414	4.71e-06	0.644	0.00105	1.02e-09	7.2e-06	7.87e-08	0.0185	1.77e-06	FALSE	FALSE	FALSE
P16035	TIMP2	NA	NA	NA	NA	NA	NA	NA	NA	NA	1.45	NA	1.84	NA	0.39	NA	NA	NA	NA	NA	NA	NA	NA	NA	NA	3.77e-06	NA	7.91e-07	NA	0.00846	NA	NA	NA	NA	NA	NA	NA	NA	NA	NA	6.38e-06	NA	1.45e-06	NA	0.0235	NA	FALSE	FALSE	FALSE
P16152	CBR1	-1.04	-4.6	-0.0326	-0.596	0.468	-3.56	1.01	0.446	1.51	4.57	4.01	5.07	-0.563	0.501	1.06	1.32e-05	1.28e-11	0.806	0.0022	0.0289	1.51e-10	1.73e-05	0.0119	1.07e-05	1.37e-11	1.42e-10	1.41e-10	0.00314	0.0213	0.000295	5.69e-05	3.17e-11	0.835	0.00406	0.0423	3.74e-10	4.52e-05	0.0235	2.89e-05	4.87e-11	3.73e-10	4.2e-10	0.00563	0.0509	0.000617	TRUE	TRUE	FALSE
P16220	CREB1	-0.733	-2.66	-0.816	-1.42	-0.648	-1.93	-0.0826	-0.685	0.0852	1.85	1.25	2.02	-0.603	0.168	0.771	6.75e-11	6.06e-18	1.8e-11	1.76e-14	3.08e-10	3.59e-16	0.0457	1.55e-10	0.0402	6.23e-16	9.1e-14	2.08e-16	7.45e-10	0.000632	3.66e-11	1.98e-09	5.93e-17	1.41e-10	6.56e-13	2.12e-09	2.66e-15	0.0661	2.29e-09	0.0582	5.66e-15	4.17e-13	2.07e-15	5.84e-09	0.00271	4.28e-10	FALSE	TRUE	FALSE
P16298	PPP3CB	-2.06	-3.67	-1.83	-2.16	-2.1	-1.62	0.225	-0.104	-0.0394	1.84	1.51	1.58	-0.33	-0.265	0.0649	0.000663	2.61e-06	0.00163	0.000441	0.000568	0.00389	0.633	0.824	0.933	0.00155	0.00599	0.00458	0.486	0.575	0.89	0.00174	3.58e-06	0.00277	0.000922	0.00112	0.00444	0.689	0.867	0.942	0.00198	0.00686	0.00559	0.542	0.676	0.905	TRUE	TRUE	TRUE
P16333	NCK1	0.7	-0.347	-0.0877	0.0685	0.491	-1.05	-0.788	-0.632	-0.209	0.259	0.416	0.838	0.156	0.579	0.423	0.0308	0.248	0.764	0.814	0.112	0.00154	0.00966	0.0297	0.429	0.33	0.13	0.00673	0.552	0.0432	0.124	0.0524	0.257	0.798	0.848	0.145	0.00179	0.016	0.053	0.489	0.349	0.138	0.00811	0.603	0.0903	0.159	FALSE	FALSE	FALSE
P16401	HIST1H1B	-0.0104	2.68	0.381	0.365	0.661	2.69	0.391	0.376	0.671	-2.3	-2.31	-2.02	-0.0154	0.28	0.295	0.891	3.49e-14	0.00021	0.000301	8.17e-07	3.32e-14	0.000166	0.000236	6.87e-07	2.4e-13	2.21e-13	1.23e-12	0.839	0.00243	0.00165	0.917	1.3e-13	0.000409	0.000653	2.67e-06	1.52e-13	0.000362	0.000701	2.35e-06	1.16e-12	9.29e-13	5.01e-12	0.865	0.00832	0.00299	FALSE	TRUE	FALSE
P16435	POR	-0.744	-4.84	-5.65	-3.72	-5.37	-4.1	-4.9	-2.98	-4.63	-0.807	1.12	-0.529	1.93	0.278	-1.65	0.000105	3.54e-14	5.07e-15	9.67e-13	9.58e-15	2.89e-13	3.01e-14	1.56e-11	6.28e-14	4.88e-05	1.68e-06	0.00179	3.21e-09	0.0596	2.06e-08	0.000352	1.32e-13	1.07e-13	1.96e-11	2.07e-13	1.1e-12	6.68e-13	3.4e-10	1.26e-12	7.21e-05	2.62e-06	0.00226	2.06e-08	0.118	1.04e-07	FALSE	TRUE	TRUE
P16615	ATP2A2	-0.218	-4.02	-4.88	-2.87	-4.64	-3.81	-4.66	-2.65	-4.42	-0.86	1.15	-0.62	2.01	0.24	-1.77	0.0182	5.48e-16	4.71e-17	3.89e-14	8.92e-17	1.11e-15	8.39e-17	1.05e-13	1.64e-16	1e-07	3.16e-09	3.82e-06	3.35e-12	0.0107	1.63e-11	0.033	3.09e-15	1.88e-15	1.27e-12	3.36e-15	7.39e-15	4.09e-15	4.92e-12	7.24e-15	2.07e-07	6.87e-09	6.45e-06	5.8e-11	0.0286	2.1e-10	FALSE	TRUE	TRUE
P16949	STMN1	-0.385	-2.2	-0.0139	-0.423	0.643	-1.82	0.371	-0.0384	1.03	2.19	1.78	2.85	-0.409	0.657	1.07	4.68e-06	3.38e-15	0.789	1.69e-06	1.43e-08	3.8e-14	6.9e-06	0.464	4.82e-11	3.66e-15	4.97e-14	1.33e-16	2.43e-06	1.11e-08	3.06e-11	2.29e-05	1.58e-14	0.82	5.71e-06	6.73e-08	1.71e-13	1.93e-05	0.556	4.3e-10	2.77e-14	2.39e-13	1.4e-15	7.84e-06	3.24e-07	3.67e-10	FALSE	TRUE	FALSE
P17010	ZFX	0.19	2.79	0.776	0.173	0.839	2.6	0.586	-0.0168	0.65	-2.02	-2.62	-1.95	-0.603	0.0633	0.666	0.0237	1.9e-14	1.23e-07	0.0361	4.98e-08	4.62e-14	2.8e-06	0.824	9.15e-07	1.14e-12	4.26e-14	1.7e-12	2.06e-06	0.407	6.9e-07	0.0414	7.49e-14	4.05e-07	0.0528	2.1e-07	2.05e-13	8.5e-06	0.867	3.04e-06	4.9e-12	2.08e-13	6.79e-12	6.8e-06	0.523	2.48e-06	FALSE	TRUE	FALSE
P17026	ZNF22	0.214	2.07	0.492	0.527	0.225	1.86	0.277	0.313	0.0109	-1.58	-1.54	-1.85	0.0352	-0.267	-0.302	0.0174	1.73e-12	3.17e-05	1.59e-05	0.0133	6.74e-12	0.00375	0.00161	0.891	5.03e-11	6.64e-11	7.26e-12	0.661	0.00489	0.00209	0.0317	4.82e-12	6.96e-05	4.41e-05	0.0207	2.02e-11	0.00667	0.00396	0.907	1.63e-10	1.86e-10	2.59e-11	0.702	0.0148	0.00371	FALSE	TRUE	FALSE
P17028	ZNF24	-0.326	-1.06	0.139	-0.152	0.194	-0.738	0.465	0.174	0.52	1.2	0.912	1.26	-0.291	0.0546	0.346	1.54e-06	1.11e-12	0.00349	0.00187	0.000268	1.05e-10	2.73e-08	0.000651	7.33e-09	2.37e-13	7.59e-12	1.36e-13	5.23e-06	0.184	8.17e-07	8.83e-06	3.17e-12	0.00559	0.00349	0.000557	2.67e-10	1.3e-07	0.00176	3.83e-08	1.15e-12	2.46e-11	6.66e-13	1.58e-05	0.287	2.88e-06	FALSE	TRUE	FALSE
P17096	HMGA1	-0.924	0.578	-1.4	-1.65	-1.21	1.5	-0.476	-0.726	-0.282	-1.98	-2.23	-1.78	-0.249	0.195	0.444	1.94e-12	6.44e-10	1.04e-14	1.31e-15	6.89e-14	4.32e-15	6.59e-09	3.9e-11	2.66e-06	1.32e-16	2.93e-17	4.91e-16	9.53e-06	0.000108	1.51e-08	1.17e-10	1.28e-09	2.01e-13	8.64e-14	1.15e-12	2.47e-14	3.56e-08	7.23e-10	8.1e-06	1.45e-15	3.2e-16	4.28e-15	2.74e-05	0.000605	7.97e-08	FALSE	FALSE	TRUE
P17174	GOT1	-0.691	-4.01	0.285	-1.38	0.889	-3.32	0.976	-0.693	1.58	4.29	2.62	4.9	-1.67	0.604	2.27	0.0036	4.38e-09	0.281	2.94e-05	0.00617	2.21e-08	0.00364	0.00353	0.000148	4.71e-08	1.62e-07	1.53e-08	9.87e-05	0.0786	9.07e-06	0.00784	7.83e-09	0.327	7.69e-05	0.0102	3.99e-08	0.00649	0.00801	0.000329	1e-07	2.83e-07	3.4e-08	0.000234	0.146	2.56e-05	FALSE	TRUE	FALSE
P17252	PRKCA	0.715	-0.8	-1.82	-1.01	-1.67	-1.52	-2.53	-1.72	-2.38	-1.02	-0.205	-0.869	0.811	0.147	-0.664	1.12e-06	3.19e-07	1.74e-11	2.3e-08	4.93e-11	1.63e-10	2.75e-13	3.41e-11	5.82e-13	2.03e-08	0.0283	1.25e-07	2.75e-07	0.1	2.5e-06	6.72e-06	4.72e-07	1.36e-10	1.16e-07	4e-10	4e-10	4.57e-12	6.45e-10	9.03e-12	4.52e-08	0.0311	2.51e-07	1.09e-06	0.177	8.03e-06	FALSE	FALSE	TRUE
P17275	JUNB	-1.42	-0.716	-1.55	-1.66	-1.5	0.704	-0.129	-0.238	-0.0768	-0.833	-0.942	-0.781	-0.109	0.0521	0.161	1.93e-06	0.00121	7.45e-07	3.48e-07	1.09e-06	0.00137	0.469	0.192	0.664	0.000355	0.00012	0.000609	0.539	0.768	0.368	1.06e-05	0.00138	2.1e-06	1.35e-06	3.44e-06	0.00161	0.531	0.264	0.708	0.000484	0.000156	0.000809	0.591	0.836	0.421	TRUE	FALSE	TRUE
P17302	GJA1	NA	NA	NA	NA	NA	-2.9	-2.99	-1.09	-2.73	-0.089	1.81	0.171	1.9	0.26	-1.64	NA	NA	NA	NA	NA	3.86e-11	2.97e-11	1.68e-07	6.53e-11	0.121	1.15e-10	0.00976	7.59e-11	0.000804	2.71e-10	NA	NA	NA	NA	NA	1.04e-10	2.95e-10	1.04e-06	5.63e-10	0.133	3.08e-10	0.0116	8.5e-10	0.00329	2.34e-09	FALSE	FALSE	FALSE
P17480	UBTF	-0.162	0.189	-0.756	0.416	-0.76	0.351	-0.595	0.578	-0.598	-0.946	0.226	-0.949	1.17	-0.00313	-1.18	3.72e-06	6.68e-07	3.34e-14	5.9e-11	3.17e-14	4.71e-10	6.87e-13	9.89e-13	6.44e-13	1.99e-15	8.77e-08	1.91e-15	1.32e-16	0.883	1.27e-16	1.87e-05	9.59e-07	5.51e-13	6.65e-10	5.91e-13	1.08e-09	1.05e-11	3.26e-11	9.74e-12	1.59e-14	1.58e-07	1.46e-14	1.35e-14	0.917	1.24e-14	FALSE	FALSE	FALSE
P17535	JUND	-0.805	0.0131	-0.812	-1.13	-0.382	0.818	-0.00751	-0.328	0.423	-0.825	-1.15	-0.395	-0.32	0.431	0.751	1.96e-06	0.896	1.77e-06	4.14e-08	0.00192	1.64e-06	0.94	0.00546	0.000882	1.49e-06	3.62e-08	0.0015	0.00632	0.000767	4.13e-06	1.07e-05	0.9	4.74e-06	1.96e-07	0.00347	2.44e-06	0.952	0.0117	0.00171	2.65e-06	6.86e-08	0.00191	0.0106	0.00318	1.25e-05	FALSE	FALSE	FALSE
P17612	PRKACA	-0.519	-2.99	-0.989	-0.614	-0.876	-2.47	-0.471	-0.0951	-0.358	2	2.37	2.11	0.376	0.113	-0.263	1.6e-08	5.37e-18	6.05e-12	2.14e-09	2.72e-11	6.03e-17	5e-08	0.0394	1.12e-06	8.78e-16	9.92e-17	4.38e-16	6.56e-07	0.0177	2.83e-05	1.83e-07	5.35e-17	5.25e-11	1.45e-08	2.31e-10	5.69e-16	2.23e-07	0.0678	3.63e-06	7.65e-15	9.42e-16	3.9e-15	2.41e-06	0.0438	7.24e-05	FALSE	TRUE	FALSE
P17655	CAPN2	-0.609	-3.58	-0.237	0.491	-0.218	-2.98	0.372	1.1	0.391	3.35	4.07	3.37	0.728	0.019	-0.709	6.04e-07	2.22e-16	0.00363	6.22e-06	0.00623	2.34e-15	9.71e-05	5.81e-10	6.08e-05	5.28e-16	4.37e-17	4.92e-16	7.94e-08	0.78	1.08e-07	3.99e-06	1.41e-15	0.0058	1.88e-05	0.0103	1.46e-14	0.00022	7.23e-09	0.000145	4.87e-15	4.63e-16	4.28e-15	3.58e-07	0.845	4.59e-07	FALSE	TRUE	FALSE
P17661	DES	0.144	-1.46	-2.36	-0.786	-2.4	-1.61	-2.5	-0.931	-2.54	-0.893	0.677	-0.937	1.57	-0.0438	-1.61	0.000196	3.13e-16	7.43e-19	7.85e-13	5.88e-19	9.5e-17	3.49e-19	9.46e-14	2.8e-19	1.59e-13	5.12e-12	8.7e-14	1.28e-16	0.141	9.04e-17	0.000609	1.89e-15	5.55e-17	1.65e-11	4.58e-17	8.49e-16	4.18e-17	4.55e-12	3.78e-17	7.98e-13	1.71e-11	4.42e-13	1.35e-14	0.231	1.07e-14	FALSE	TRUE	TRUE
P17812	CTPS1	-0.908	-4	-0.255	-0.763	-0.00992	-3.09	0.653	0.144	0.898	3.74	3.23	3.99	-0.509	0.245	0.753	9.93e-09	9.68e-17	0.00301	7.6e-08	0.889	2.52e-15	4.49e-07	0.0589	1.13e-08	2.23e-16	1.41e-15	9.99e-17	6.76e-06	0.00394	8.85e-08	1.22e-07	6.78e-16	0.00486	3.37e-07	0.908	1.56e-14	1.63e-06	0.0963	5.68e-08	2.31e-15	9.71e-15	1.08e-15	1.99e-05	0.0124	3.86e-07	FALSE	TRUE	FALSE
P17858	PFKL	-0.207	-1.67	0.155	0.27	-0.0935	-1.46	0.362	0.476	0.113	1.83	1.94	1.58	0.114	-0.249	-0.363	0.00367	6.07e-13	0.0195	0.000495	0.133	3.16e-12	3.43e-05	2.02e-06	0.0744	1.99e-13	9.26e-14	1.25e-12	0.0718	0.000944	3.32e-05	0.00796	1.82e-12	0.0277	0.00102	0.169	1e-11	8.43e-05	9.41e-06	0.102	9.82e-13	4.23e-13	5.1e-12	0.0981	0.00374	8.36e-05	FALSE	TRUE	FALSE
P17931	LGALS3	-0.445	-3.97	-1.03	-0.371	-0.417	-3.52	-0.581	0.074	0.0279	2.94	3.6	3.55	0.655	0.609	-0.046	1.4e-08	1.8e-20	4.89e-13	1.17e-07	3e-08	8.14e-20	5.62e-10	0.0557	0.441	8.02e-19	6.25e-20	7.36e-20	1.3e-10	3.17e-10	0.213	1.64e-07	5.21e-19	5.75e-12	5.03e-07	1.32e-07	2.47e-18	4.07e-09	0.0917	0.5	2.24e-17	2.33e-18	3.11e-18	1.33e-09	2.24e-08	0.259	FALSE	TRUE	TRUE
P17980	PSMC3	-0.0928	-1.15	0.392	-0.00953	0.387	-1.05	0.485	0.0833	0.48	1.54	1.14	1.53	-0.401	-0.0046	0.397	0.0703	4.66e-12	1.64e-06	0.843	1.87e-06	1.33e-11	1.53e-07	0.1	1.7e-07	1.17e-13	5.17e-12	1.22e-13	1.26e-06	0.924	1.43e-06	0.108	1.22e-11	4.41e-06	0.87	5.58e-06	3.83e-11	6.07e-07	0.153	6.61e-07	6.09e-13	1.73e-11	6.02e-13	4.38e-06	0.947	4.81e-06	FALSE	TRUE	FALSE
P17987	TCP1	-0.619	-3.89	-0.407	-0.231	0.0269	-3.27	0.212	0.389	0.646	3.49	3.66	3.92	0.176	0.434	0.258	3.65e-11	3.05e-21	6.08e-09	3.87e-06	0.386	2.76e-20	9.3e-06	1.06e-08	2.16e-11	1.24e-20	6.64e-21	2.8e-21	5.92e-05	2.82e-09	1.18e-06	1.24e-09	1.43e-19	2.62e-08	1.22e-05	0.445	1.14e-18	2.54e-05	9.04e-08	2.18e-10	1.09e-18	5.01e-19	2.59e-19	0.000146	1.06e-07	4.01e-06	FALSE	TRUE	FALSE
P18031	PTPN1	NA	NA	NA	NA	NA	-4.34	-4.25	-2.06	-3.65	0.0832	2.28	0.68	2.2	0.597	-1.6	NA	NA	NA	NA	NA	1.41e-08	1.7e-08	1.24e-05	7.01e-08	0.721	1.9e-06	0.0137	2.65e-06	0.0256	4.04e-05	NA	NA	NA	NA	NA	2.63e-08	8.41e-08	4.87e-05	2.91e-07	0.735	2.95e-06	0.0161	8.48e-06	0.0591	0.000101	FALSE	FALSE	FALSE
P18074	ERCC2	-0.724	-2.34	-2.72	-1.73	-2.54	-1.62	-1.99	-1	-1.81	-0.376	0.613	-0.196	0.989	0.18	-0.809	0.00162	1.14e-08	1.91e-09	3.84e-07	4.35e-09	8.05e-07	7.53e-08	0.000106	2.23e-07	0.0596	0.00511	0.301	0.000121	0.341	0.000684	0.00388	1.95e-08	9.21e-09	1.48e-06	2.26e-08	1.23e-06	3.24e-07	0.000339	8.45e-07	0.0669	0.00588	0.319	0.000284	0.458	0.00133	FALSE	TRUE	TRUE
P18077	RPL35A	0.0723	1.76	0.566	0.156	0.488	1.69	0.494	0.0836	0.416	-1.2	-1.61	-1.27	-0.41	-0.0781	0.332	0.00269	3e-19	5.13e-13	2.56e-06	3.29e-12	5.11e-19	2.84e-12	0.000918	2.41e-11	4.12e-17	9.74e-19	1.85e-17	2.84e-11	0.00154	3.82e-10	0.00609	4.89e-18	5.98e-12	8.28e-06	3.46e-11	1.03e-17	3.75e-11	0.00238	2.39e-10	5.33e-16	1.9e-17	2.43e-16	3.54e-10	0.00568	3.14e-09	FALSE	TRUE	FALSE
P18124	RPL7	0.0173	2.64	0.305	0.216	0.223	2.62	0.288	0.198	0.206	-2.34	-2.43	-2.42	-0.0895	-0.0825	0.00708	0.606	1.3e-18	4.82e-07	1.95e-05	1.41e-05	1.41e-18	9.22e-07	4.43e-05	3.15e-05	6.17e-18	3.83e-18	3.97e-18	0.0173	0.0261	0.832	0.676	1.59e-17	1.41e-06	5.29e-05	3.57e-05	2.28e-17	3.14e-06	0.000154	7.87e-05	1.18e-16	5.89e-17	7.11e-17	0.0269	0.06	0.855	FALSE	TRUE	FALSE
P18146	EGR1	-0.428	1.23	-1.02	-0.681	-0.511	1.66	-0.594	-0.254	-0.083	-2.25	-1.91	-1.74	0.34	0.511	0.171	0.00419	2.09e-07	1.71e-06	0.000102	0.00118	6.44e-09	0.000348	0.0598	0.511	1.58e-10	1.16e-09	3.59e-09	0.0163	0.00118	0.188	0.00896	3.15e-07	4.57e-06	0.000242	0.00221	1.25e-08	0.000731	0.0975	0.569	4.75e-10	2.69e-09	8.74e-09	0.0254	0.00453	0.232	FALSE	TRUE	TRUE
P18206	VCL	-0.438	-4.89	-0.656	-0.399	-0.0629	-4.46	-0.217	0.0396	0.375	4.24	4.5	4.83	0.257	0.593	0.336	7.99e-09	5.68e-22	5.96e-11	2.46e-08	0.0794	1.87e-21	1.95e-05	0.252	4.97e-08	3.54e-21	1.67e-21	6.7e-22	3.44e-06	2.06e-10	1.8e-07	1.02e-07	4.31e-20	4.06e-10	1.23e-07	0.106	1.68e-19	5.03e-05	0.334	2.15e-07	4.1e-19	1.66e-19	8.67e-20	1.08e-05	1.63e-08	7.43e-07	FALSE	TRUE	FALSE
P18433	PTPRA	NA	NA	NA	NA	NA	-1.13	-0.0499	NA	0.771	1.08	NA	1.9	NA	0.821	NA	NA	NA	NA	NA	NA	0.00102	0.796	NA	0.022	0.000726	NA	0.000232	NA	0.0135	NA	NA	NA	NA	NA	NA	0.0012	0.833	NA	0.0333	0.000958	NA	0.000322	NA	0.0347	NA	FALSE	FALSE	FALSE
P18583	SON	-0.126	1.3	-0.0281	0.274	0.0544	1.42	0.0984	0.401	0.181	-1.32	-1.02	-1.24	0.302	0.0825	-0.22	0.243	1.54e-08	0.79	0.0201	0.607	5.08e-09	0.358	0.00197	0.104	1.19e-08	2.42e-07	2.55e-08	0.012	0.439	0.0535	0.314	2.6e-08	0.821	0.0308	0.657	1.01e-08	0.42	0.00475	0.137	2.76e-08	4.15e-07	5.53e-08	0.0192	0.554	0.074	FALSE	TRUE	FALSE
P18621	RPL17	0.0479	1.86	0.301	0.375	0.533	1.81	0.253	0.327	0.485	-1.56	-1.48	-1.32	0.0741	0.232	0.158	0.169	1.16e-16	5.8e-07	4.68e-08	7.06e-10	1.62e-16	3.84e-06	2.26e-07	2.21e-09	1.09e-15	2.02e-15	8.38e-15	0.042	9.52e-06	0.000364	0.23	7.9e-16	1.67e-06	2.19e-07	4.42e-09	1.35e-15	1.13e-05	1.34e-06	1.29e-08	9.25e-15	1.34e-14	5.29e-14	0.0607	8.13e-05	0.000748	FALSE	TRUE	FALSE
P18669	PGAM1	-0.634	-5.45	0.0172	-0.381	1.01	-4.81	0.652	0.254	1.64	5.47	5.07	6.46	-0.398	0.99	1.39	2.98e-05	2e-16	0.867	0.00235	2.12e-07	9.58e-16	2.29e-05	0.0257	6.55e-10	1.92e-16	5e-16	2.33e-17	0.00171	2.58e-07	4.98e-09	0.000117	1.28e-15	0.888	0.00431	7.77e-07	6.47e-15	5.81e-05	0.0466	4.33e-09	2.03e-15	3.91e-15	2.98e-16	0.0032	3.93e-06	2.99e-08	FALSE	TRUE	FALSE
P18754	RCC1	-0.199	-1.83	-1.5	-0.843	-1.29	-1.63	-1.3	-0.644	-1.09	0.334	0.989	0.544	0.654	0.209	-0.445	0.000231	1.31e-15	1.67e-14	2.23e-11	1.11e-13	5.58e-15	1e-13	6.08e-10	9.11e-13	1.29e-06	3.05e-12	4.72e-09	5e-10	0.000143	5.03e-08	0.000696	6.82e-15	2.94e-13	2.95e-10	1.74e-12	3.08e-14	1.96e-12	7.44e-09	1.33e-11	2.31e-06	1.05e-11	1.13e-08	4.11e-09	0.000771	2.33e-07	FALSE	TRUE	TRUE
P18846	ATF1	0.225	-1.59	-0.777	-0.0542	-1.22	-1.81	-1	-0.279	-1.45	0.812	1.53	0.366	0.723	-0.446	-1.17	0.352	1.36e-05	0.00548	0.819	0.000168	3.43e-06	0.000899	0.252	3.45e-05	0.00414	1.93e-05	0.14	0.00855	0.0784	0.000251	0.429	1.76e-05	0.00853	0.852	0.00036	4.91e-06	0.00175	0.334	8.55e-05	0.00508	2.71e-05	0.152	0.0141	0.146	0.000533	FALSE	TRUE	FALSE
P18858	LIG1	-0.969	-4.51	-0.814	-0.305	-1.19	-3.54	0.155	0.664	-0.216	3.7	4.21	3.33	0.509	-0.371	-0.88	0.000448	1.84e-11	0.00176	0.164	7.49e-05	3.62e-10	0.467	0.00697	0.316	2.15e-10	4.38e-11	7.79e-10	0.0288	0.0966	0.00098	0.00124	4.47e-11	0.00297	0.207	0.000168	8.4e-10	0.53	0.0145	0.373	6.33e-10	1.27e-10	2.11e-09	0.0429	0.172	0.00186	FALSE	TRUE	FALSE
P18887	XRCC1	-0.231	-2.41	-2.43	-0.887	-2.11	-2.18	-2.2	-0.657	-1.88	-0.0138	1.53	0.301	1.54	0.315	-1.22	0.00118	3.25e-15	3.03e-15	8.52e-10	1.75e-14	1.16e-14	1.07e-14	3.12e-08	7.53e-14	0.808	1.04e-12	0.000125	9.31e-13	8.24e-05	1.62e-11	0.00291	1.53e-14	6.8e-14	6.59e-09	3.41e-13	5.89e-14	2.71e-13	2.25e-07	1.48e-12	0.818	3.87e-12	0.000178	1.97e-11	0.000489	2.1e-10	FALSE	TRUE	TRUE
P19022	CDH2	1.77	0.387	1.08	1.72	0.905	-1.38	-0.686	-0.0445	-0.861	0.693	1.33	0.518	0.641	-0.175	-0.817	0.000425	0.258	0.00632	0.000208	0.017	0.00269	0.0846	0.905	0.0362	0.0551	0.00155	0.138	0.0729	0.601	0.0279	0.00118	0.267	0.00971	0.000466	0.026	0.00309	0.115	0.929	0.0527	0.062	0.00185	0.15	0.0995	0.698	0.0408	TRUE	FALSE	TRUE
P19367	HK1	-0.492	-4.66	-0.839	-0.467	-1.29	-4.17	-0.347	0.025	-0.798	3.82	4.2	3.37	0.372	-0.451	-0.823	8.45e-09	4.85e-21	1.25e-11	1.57e-08	5.7e-14	2e-20	4.83e-07	0.514	2.31e-11	6.02e-20	1.85e-20	2.97e-19	2.2e-07	2.34e-08	1.58e-11	1.07e-07	1.93e-19	1.02e-10	8.33e-08	9.91e-13	9.42e-19	1.73e-06	0.603	2.31e-10	3.25e-18	1e-18	9.01e-18	9.04e-07	5.58e-07	2.06e-10	FALSE	TRUE	FALSE
P19387	POLR2C	-0.0864	0.509	0.0119	-1.05	-0.0185	0.595	0.0983	-0.959	0.0679	-0.497	-1.55	-0.527	-1.06	-0.0304	1.03	0.384	0.000151	0.903	7.95e-08	0.85	3.46e-05	0.324	2.14e-07	0.491	0.000187	7.08e-10	0.000109	6.98e-08	0.756	9.77e-08	0.461	0.000183	0.917	3.52e-07	0.877	4.54e-05	0.386	1.28e-06	0.55	0.000261	1.69e-09	0.000157	3.18e-07	0.827	4.22e-07	FALSE	FALSE	FALSE
P19447	ERCC3	-0.468	-2.05	-2.12	-0.657	-2.02	-1.59	-1.65	-0.189	-1.55	-0.0612	1.4	0.0359	1.46	0.097	-1.36	0.0304	1.01e-07	7.18e-08	0.0047	1.24e-07	1.83e-06	1.21e-06	0.343	2.34e-06	0.755	7.05e-06	0.855	4.5e-06	0.622	9.23e-06	0.0518	1.57e-07	2.48e-07	0.00816	4.8e-07	2.69e-06	3.99e-06	0.43	7.21e-06	0.767	1.03e-05	0.864	1.38e-05	0.717	2.59e-05	FALSE	TRUE	TRUE
P19623	SRM	-0.774	-5.98	-1.02	-0.781	-0.219	-5.21	-0.244	-0.00686	0.555	4.96	5.2	5.76	0.238	0.8	0.562	0.000185	4.53e-14	1.51e-05	0.000172	0.201	2.27e-13	0.117	0.963	0.00507	3.97e-13	2.3e-13	2.56e-13	0.126	0.000359	0.00469	0.00058	1.64e-13	3.5e-05	0.000391	0.246	8.8e-13	0.155	0.975	0.00867	1.85e-12	9.65e-13	1.2e-12	0.164	0.00166	0.00785	FALSE	TRUE	TRUE
P19784	CSNK2A2	-0.483	-1.49	-0.476	-1.42	-0.495	-1.01	0.00765	-0.936	-0.0119	1.02	0.0747	0.999	-0.944	-0.0196	0.924	2.8e-06	4.29e-12	3.32e-06	8.12e-12	2.15e-06	5.34e-10	0.902	1.36e-09	0.848	4.87e-10	0.242	6.17e-10	1.23e-09	0.753	1.58e-09	1.46e-05	1.13e-11	8.59e-06	1.2e-10	6.34e-06	1.21e-09	0.921	1.53e-08	0.87	1.37e-09	0.254	1.69e-09	8.86e-09	0.825	1.1e-08	FALSE	TRUE	FALSE
P19793	RXRA	NA	NA	NA	NA	NA	NA	NA	NA	NA	2.78	NA	NA	NA	NA	NA	NA	NA	NA	NA	NA	NA	NA	NA	NA	3.6e-06	NA	NA	NA	NA	NA	NA	NA	NA	NA	NA	NA	NA	NA	NA	6.11e-06	NA	NA	NA	NA	NA	FALSE	FALSE	FALSE
P19838	NFKB1	-0.365	-3.05	-0.491	-0.34	-0.174	-2.68	-0.126	0.0242	0.191	2.55	2.71	2.87	0.151	0.317	0.167	0.0102	1.22e-11	0.00149	0.0148	0.171	1.46e-11	0.259	0.824	0.0991	2.55e-11	1.32e-11	6.62e-12	0.183	0.0118	0.144	0.0196	3.03e-11	0.00256	0.0232	0.213	4.18e-11	0.315	0.867	0.131	8.66e-11	4.14e-11	2.38e-11	0.229	0.0311	0.182	FALSE	TRUE	FALSE
P20020	ATP2B1	-0.908	-4.17	-4.4	-2.14	-3.79	-3.26	-3.5	-1.23	-2.88	-0.235	2.03	0.378	2.27	0.613	-1.65	3.88e-06	1.28e-12	7.53e-13	7.89e-10	3.21e-12	1.42e-12	7.24e-13	1.61e-08	4.66e-12	0.00507	4.69e-11	0.000197	1.63e-11	3.49e-06	3.39e-10	1.94e-05	3.63e-12	8.42e-12	6.14e-09	3.39e-11	4.76e-12	1.1e-11	1.3e-07	5.66e-11	0.00619	1.35e-10	0.000274	2.21e-10	3.51e-05	2.84e-09	FALSE	TRUE	TRUE
P20042	EIF2S2	-0.458	-3.2	-0.98	-0.664	-0.885	-2.74	-0.523	-0.206	-0.428	2.22	2.54	2.31	0.316	0.0954	-0.221	4.56e-07	1.82e-17	5.23e-11	6.02e-09	1.85e-10	1.29e-16	9.97e-08	0.00104	9.7e-07	1.88e-15	3.47e-16	1.1e-15	2.3e-05	0.0731	0.000601	3.14e-06	1.56e-16	3.63e-10	3.55e-08	1.32e-09	1.11e-15	4.17e-07	0.00266	3.21e-06	1.5e-14	2.85e-15	8.89e-15	6.08e-05	0.138	0.00119	FALSE	TRUE	FALSE
P20073	ANXA7	-0.409	-4.37	-2.17	-1	-1.84	-3.96	-1.77	-0.591	-1.43	2.19	3.37	2.53	1.17	0.332	-0.842	0.000373	4.12e-16	2.7e-12	3.47e-08	2.12e-11	1.43e-15	3.6e-11	1.16e-05	4.66e-10	2.4e-12	1.1e-14	4.12e-13	5.21e-09	0.00193	2.54e-07	0.00106	2.4e-15	2.59e-11	1.69e-07	1.85e-10	9.31e-15	3.47e-10	4.59e-05	3.24e-09	9.61e-12	6.04e-14	1.86e-12	3.15e-08	0.0068	1.01e-06	FALSE	TRUE	TRUE
P20248	CCNA2	NA	-2.26	-0.149	0.739	0.0408	NA	NA	NA	NA	2.11	3	2.3	0.888	0.19	-0.698	NA	7.47e-05	0.532	0.0377	0.87	NA	NA	NA	NA	1.61e-05	1.57e-05	1.86e-05	0.00819	0.328	0.0275	NA	9.19e-05	0.582	0.0548	0.892	NA	NA	NA	NA	2.54e-05	2.23e-05	2.9e-05	0.0135	0.446	0.0403	FALSE	TRUE	FALSE
P20290	BTF3	-0.522	-2.96	-0.871	-2.3	-0.849	-2.44	-0.35	-1.78	-0.327	2.09	0.659	2.11	-1.43	0.0228	1.45	2.52e-05	3.08e-14	9.78e-08	7.33e-13	1.33e-07	3.54e-13	0.0009	1.82e-11	0.00151	2.47e-12	2.24e-06	2.16e-12	2.72e-10	0.784	2.24e-10	0.000102	1.17e-13	3.26e-07	1.56e-11	5.12e-07	1.33e-12	0.00175	3.83e-10	0.00282	9.84e-12	3.43e-06	8.42e-12	2.48e-09	0.847	1.99e-09	FALSE	TRUE	FALSE
P20338	RAB4A	NA	NA	NA	NA	NA	NA	NA	NA	NA	NA	NA	3.22	NA	NA	NA	NA	NA	NA	NA	NA	NA	NA	NA	NA	NA	NA	2.42e-06	NA	NA	NA	NA	NA	NA	NA	NA	NA	NA	NA	NA	NA	NA	4.18e-06	NA	NA	NA	FALSE	FALSE	FALSE
P20340	RAB6A	-0.221	-3.77	-3.25	-1.58	-2.53	-3.55	-3.03	-1.36	-2.31	0.52	2.19	1.24	1.67	0.72	-0.949	0.0408	1.4e-14	9.12e-14	7.11e-10	2.11e-12	3.02e-14	2.22e-13	4.42e-09	6.63e-12	0.000144	1.27e-11	1.3e-08	3.59e-10	5.91e-06	2.87e-07	0.0673	5.69e-14	1.34e-12	5.59e-09	2.37e-11	1.38e-13	3.8e-12	4.22e-08	7.71e-11	0.000203	4e-11	2.93e-08	3.14e-09	5.53e-05	1.13e-06	FALSE	TRUE	TRUE
P20585	MSH3	NA	-1.42	NA	1.93	NA	NA	NA	NA	NA	NA	3.35	NA	NA	NA	NA	NA	2.24e-05	NA	1.69e-05	NA	NA	NA	NA	NA	NA	2.18e-06	NA	NA	NA	NA	NA	2.87e-05	NA	4.65e-05	NA	NA	NA	NA	NA	NA	3.35e-06	NA	NA	NA	NA	FALSE	TRUE	FALSE
P20618	PSMB1	-0.481	-2.75	0.0664	-0.0179	0.15	-2.27	0.547	0.463	0.631	2.82	2.73	2.9	-0.0843	0.0838	0.168	8.13e-07	4.42e-16	0.242	0.746	0.0159	5.01e-15	1.9e-07	1.23e-06	3.65e-08	3.27e-16	4.8e-16	2.26e-16	0.143	0.145	0.00848	5.11e-06	2.57e-15	0.285	0.791	0.0244	2.8e-14	7.4e-07	6e-06	1.62e-07	3.21e-15	3.79e-15	2.21e-15	0.184	0.237	0.0136	FALSE	TRUE	FALSE
P20645	M6PR	NA	NA	NA	NA	NA	-5.99	-5.39	-3	-4.78	0.595	2.99	1.21	2.39	0.611	-1.78	NA	NA	NA	NA	NA	4.15e-14	1.03e-13	1.69e-11	2.94e-13	8.85e-07	8.6e-13	2.22e-09	5.94e-12	7.12e-07	7.68e-11	NA	NA	NA	NA	NA	1.85e-13	2.01e-12	3.64e-10	4.92e-12	1.62e-06	3.24e-12	5.6e-09	9.24e-11	8.94e-06	7.89e-10	FALSE	FALSE	FALSE
P20700	LMNB1	-0.513	-3.37	-1.36	-0.166	-1.26	-2.86	-0.847	0.347	-0.743	2.01	3.21	2.12	1.19	0.104	-1.09	0.000115	3.53e-14	2.76e-09	0.1	7.15e-09	2.81e-13	6.83e-07	0.00276	2.86e-06	2.25e-11	6.66e-14	1.2e-11	1.31e-08	0.288	3.83e-08	0.000382	1.31e-13	1.28e-08	0.132	3.57e-08	1.07e-12	2.38e-06	0.00639	8.67e-06	7.69e-11	3.12e-13	4.2e-11	7.07e-08	0.403	1.81e-07	FALSE	TRUE	TRUE
P20742	PZP	-0.0408	-3.33	-1.07	-0.354	-1.38	-3.29	-1.02	-0.313	-1.34	2.27	2.98	1.95	0.712	-0.319	-1.03	0.87	1.44e-08	0.000941	0.172	0.00011	4.76e-09	0.000536	0.176	5.26e-05	2.83e-07	1.45e-08	1.39e-06	0.00684	0.169	0.000512	0.899	2.43e-08	0.00167	0.216	0.00024	9.48e-09	0.00109	0.246	0.000126	5.53e-07	2.87e-08	2.46e-06	0.0114	0.267	0.00103	FALSE	TRUE	TRUE
P20774	OGN	0.813	-3.09	-1.25	0.267	-1.23	-3.9	-2.06	-0.546	-2.04	1.84	3.36	1.86	1.52	0.0164	-1.5	0.000408	4.76e-10	4.47e-06	0.0972	5.06e-06	4.07e-11	3.16e-08	0.00362	3.43e-08	3.18e-08	6.14e-11	2.91e-08	2.28e-07	0.903	2.55e-07	0.00115	9.57e-10	1.13e-05	0.129	1.4e-05	1.09e-10	1.48e-07	0.00818	1.53e-07	6.92e-08	1.74e-10	6.26e-08	9.32e-07	0.932	1.02e-06	FALSE	TRUE	TRUE
P20839	IMPDH1	-2.11	-6.35	NA	-1.17	NA	-4.23	NA	0.947	NA	NA	5.18	NA	NA	NA	NA	0.0151	0.000264	NA	0.116	NA	0.000491	NA	0.134	NA	NA	0.000553	NA	NA	NA	NA	0.0281	0.000314	NA	0.151	NA	0.000593	NA	0.195	NA	NA	0.000681	NA	NA	NA	NA	FALSE	TRUE	FALSE
P20908	COL5A1	-0.327	-1.3	-1.93	-0.78	-1.76	-0.972	-1.6	-0.453	-1.43	-0.628	0.518	-0.458	1.15	0.17	-0.977	4.57e-09	1.57e-16	1.06e-18	9.81e-14	3.41e-18	6.17e-15	1.12e-17	8.58e-11	4.65e-17	1.49e-12	1.63e-11	7.54e-11	7.63e-16	7.56e-06	5.8e-15	6.59e-08	1.04e-15	7.42e-17	2.82e-12	2.09e-16	3.37e-14	7.41e-16	1.38e-09	2.5e-15	6.24e-12	5.04e-11	2.33e-10	4.85e-14	6.72e-05	2.6e-13	FALSE	TRUE	TRUE
P20930	FLG	-1.04	0.745	0.314	-0.0216	0.166	1.79	1.36	1.02	1.21	-0.431	-0.767	-0.58	-0.335	-0.148	0.187	1.39e-08	6.68e-07	0.00224	0.797	0.0658	1.97e-11	5.88e-10	1.78e-08	2.39e-09	0.000172	4.86e-07	9.92e-06	0.00137	0.0956	0.0409	1.64e-07	9.59e-07	0.00371	0.833	0.0895	5.52e-11	4.22e-09	1.42e-07	1.38e-08	0.00024	8.06e-07	1.59e-05	0.00263	0.17	0.0579	TRUE	FALSE	FALSE
P20936	RASA1	0.532	-0.406	0.74	1.1	1.3	-0.937	0.208	0.567	0.766	1.15	1.5	1.7	0.358	0.558	0.2	0.276	0.358	0.11	0.0389	0.0119	0.0506	0.631	0.247	0.0992	0.0127	0.00526	0.00117	0.415	0.17	0.645	0.349	0.367	0.139	0.0563	0.0186	0.0544	0.687	0.329	0.132	0.0151	0.00606	0.00151	0.47	0.267	0.689	FALSE	FALSE	FALSE
P20962	PTMS	-1.01	-1.53	0.379	-0.601	0.192	-0.525	1.39	0.408	1.2	1.91	0.933	1.73	-0.981	-0.187	0.793	1.64e-07	1.16e-09	0.00207	4.1e-05	0.0735	0.000145	3.87e-09	0.00121	2.17e-08	7.76e-11	3.99e-07	2.75e-10	2.28e-07	0.0799	2.39e-06	1.3e-06	2.22e-09	0.00346	0.000104	0.0987	0.000181	2.21e-08	0.00305	1.02e-07	2.44e-10	6.66e-07	7.87e-10	9.3e-07	0.148	7.71e-06	TRUE	TRUE	FALSE
P21281	ATP6V1B2	-0.756	-4.73	-1.39	-0.754	-1.24	-3.98	-0.638	0.0023	-0.487	3.34	3.98	3.49	0.64	0.151	-0.49	3.31e-07	5.16e-17	2.34e-10	3.42e-07	9.45e-10	4.67e-16	2.16e-06	0.977	3.47e-05	4.27e-15	4.64e-16	2.44e-15	2.07e-06	0.0774	3.31e-05	2.37e-06	3.97e-16	1.34e-09	1.34e-06	5.69e-09	3.37e-15	6.72e-06	0.984	8.59e-05	3.13e-14	3.68e-15	1.81e-14	6.83e-06	0.144	8.35e-05	FALSE	TRUE	TRUE
P21283	ATP6V1C1	1.09	-3.2	0.486	0.378	1.47	-4.29	-0.604	-0.712	0.377	3.69	3.58	4.67	-0.108	0.982	1.09	0.0142	6.37e-06	0.214	0.459	0.00261	1.67e-07	0.0952	0.156	0.276	6.7e-07	1.84e-05	7.64e-08	0.821	0.0137	0.0409	0.0266	8.42e-06	0.256	0.519	0.00458	2.76e-07	0.129	0.222	0.331	1.24e-06	2.59e-05	1.58e-07	0.848	0.0351	0.0579	FALSE	TRUE	FALSE
P21291	CSRP1	-1.43	-5.37	-2.47	-1.58	-2.29	-3.93	-1.04	-0.147	-0.859	2.9	3.79	3.08	0.888	0.176	-0.712	1.46e-07	1.36e-14	2.22e-10	4.73e-08	5.5e-10	6.73e-13	5.2e-06	0.308	3.47e-05	3.02e-11	1.08e-12	1.45e-11	2.48e-05	0.225	0.000199	1.16e-06	5.54e-14	1.28e-09	2.21e-07	3.55e-09	2.39e-12	1.49e-05	0.394	8.59e-05	1.02e-10	4.01e-12	5.02e-11	6.54e-05	0.335	0.000433	TRUE	TRUE	TRUE
P21333	FLNA	-0.58	-4.45	-4.3	-1.88	-4.11	-3.87	-3.72	-1.3	-3.53	0.152	2.57	0.341	2.42	0.189	-2.23	6.13e-14	3.61e-25	5.62e-25	2.02e-20	9.94e-25	2.13e-24	3.54e-24	2.15e-18	6.86e-24	6.6e-07	3.93e-22	4.63e-11	8.56e-22	5.86e-08	2.4e-21	7.83e-12	6.09e-22	1.93e-21	3.46e-17	2.7e-21	2.61e-21	1.31e-20	2.62e-15	2.42e-20	1.23e-06	5.7e-20	1.48e-10	1.14e-18	1.16e-06	2.24e-18	FALSE	TRUE	TRUE
P21359	NF1	-0.275	-2.34	-0.566	0.375	-0.55	-2.07	-0.291	0.65	-0.275	1.78	2.72	1.79	0.941	0.0164	-0.925	0.161	1.36e-08	0.00923	0.0634	0.0109	5.86e-08	0.139	0.00388	0.161	3.33e-07	2.3e-09	3.01e-07	0.000219	0.931	0.000255	0.221	2.3e-08	0.0139	0.0874	0.0172	1.01e-07	0.181	0.00869	0.203	6.43e-07	5.08e-09	5.8e-07	0.000486	0.952	0.00054	FALSE	TRUE	FALSE
P21796	VDAC1	0.00735	-4.26	-4.09	-1.84	-4.02	-4.27	-4.1	-1.84	-4.03	0.168	2.42	0.241	2.26	0.073	-2.18	0.978	7.28e-10	1.19e-09	1.08e-05	1.48e-09	7.13e-10	1.16e-09	1.04e-05	1.44e-09	0.534	5.47e-07	0.376	1.21e-06	0.786	1.73e-06	0.983	1.43e-09	5.96e-09	3.13e-05	8.53e-09	1.59e-09	7.68e-09	4.16e-05	8.86e-09	0.552	9e-07	0.395	4.22e-06	0.849	5.76e-06	FALSE	TRUE	TRUE
P21810	BGN	-0.589	-3.24	-2.14	-0.996	-2.09	-2.65	-1.55	-0.407	-1.5	1.11	2.25	1.15	1.14	0.0423	-1.1	2.29e-05	3.95e-14	7.41e-12	7.61e-08	9.5e-12	4.91e-13	3.98e-10	0.000657	5.59e-10	2.21e-08	3.94e-12	1.42e-08	1.57e-08	0.65	2.46e-08	9.35e-05	1.45e-13	6.36e-11	3.37e-07	9.02e-11	1.79e-12	2.97e-09	0.00177	3.77e-09	4.89e-08	1.33e-11	3.18e-08	8.22e-08	0.739	1.21e-07	FALSE	TRUE	TRUE
P21912	SDHB	NA	NA	NA	NA	NA	-5.82	-6.63	-3.6	-6.65	-0.808	2.22	-0.827	3.03	-0.0189	-3.05	NA	NA	NA	NA	NA	5.35e-07	1.8e-07	2.6e-05	1.76e-07	0.0322	7.42e-05	0.0292	6.62e-06	0.954	6.29e-06	NA	NA	NA	NA	NA	8.35e-07	7.07e-07	9.42e-05	6.8e-07	0.0369	9.82e-05	0.0335	1.95e-05	0.966	1.83e-05	FALSE	FALSE	FALSE
P22061	PCMT1	0.501	-1.91	NA	0.268	NA	-2.41	NA	-0.233	NA	NA	2.17	NA	NA	NA	NA	0.00168	1.02e-05	NA	0.0223	NA	1.79e-06	NA	0.022	NA	NA	6.25e-06	NA	NA	NA	NA	0.00401	1.32e-05	NA	0.0339	NA	2.65e-06	NA	0.0406	NA	NA	9.17e-06	NA	NA	NA	NA	FALSE	TRUE	FALSE
P22087	FBL	-0.178	0.656	-0.835	-0.267	-0.968	0.834	-0.657	-0.0885	-0.79	-1.49	-0.923	-1.62	0.568	-0.133	-0.701	5.85e-05	2.04e-11	1e-12	9.03e-07	1.58e-13	1.02e-12	2.01e-11	0.0121	2.03e-12	6.76e-16	2.88e-13	2.3e-16	1.2e-10	0.000778	8.92e-12	0.000209	4.93e-11	1.08e-11	3.22e-06	2.34e-12	3.52e-12	2.1e-10	0.0238	2.67e-11	6.08e-15	1.18e-12	2.24e-15	1.25e-09	0.00321	1.3e-10	FALSE	FALSE	FALSE
P22102	GART	1.14	-2.43	0.732	0.768	0.213	-3.57	-0.409	-0.373	-0.927	3.16	3.2	2.64	0.0361	-0.518	-0.554	0.00806	3.95e-05	0.06	0.0503	0.654	5.14e-07	0.213	0.253	0.0595	1.55e-06	1.4e-06	0.000133	0.909	0.262	0.232	0.0159	4.97e-05	0.0789	0.0708	0.7	8.04e-07	0.265	0.335	0.0832	2.75e-06	2.21e-06	0.00019	0.925	0.376	0.28	FALSE	TRUE	FALSE
P22234	PAICS	-0.00446	-3.69	-0.173	0.0176	0.00841	-3.68	-0.169	0.0221	0.0129	3.51	3.7	3.69	0.191	0.181	-0.00919	0.919	6.32e-19	0.00156	0.69	0.849	6.42e-19	0.00189	0.618	0.771	1.16e-18	5.95e-19	6.14e-19	0.000736	0.00109	0.835	0.939	8.67e-18	0.00266	0.74	0.876	1.22e-17	0.00352	0.698	0.801	2.9e-17	1.27e-17	1.63e-17	0.0015	0.00422	0.858	FALSE	TRUE	FALSE
P22307	SCP2	-0.903	-2.71	-0.411	-0.795	-1.07	-1.81	0.493	0.108	-0.167	2.3	1.92	1.64	-0.385	-0.659	-0.275	0.00702	9.28e-07	0.16	0.0222	0.00244	1.49e-05	0.0683	0.699	0.507	1.55e-06	2.41e-05	3.54e-05	0.185	0.0206	0.334	0.0141	1.31e-06	0.196	0.0337	0.00431	2.01e-05	0.0947	0.768	0.565	2.75e-06	3.34e-05	5.34e-05	0.231	0.0495	0.386	FALSE	TRUE	FALSE
P22314	UBA1	-0.533	-4.81	-0.204	-0.427	0.492	-4.28	0.329	0.107	1.03	4.61	4.38	5.3	-0.223	0.696	0.919	4.81e-08	5.94e-20	0.000812	6.16e-07	1.22e-07	2.64e-19	9.92e-06	0.0404	1.76e-11	1.03e-19	1.93e-19	1.72e-20	0.000397	2.03e-09	6.85e-11	4.52e-07	1.35e-18	0.00145	2.28e-06	4.75e-07	6.12e-18	2.69e-05	0.0693	1.83e-10	4.83e-18	5.27e-18	1.03e-18	0.000848	8.83e-08	7.2e-10	FALSE	TRUE	FALSE
P22392	NME2	-0.464	-5.04	0.0699	-0.341	0.785	-4.57	0.534	0.123	1.25	5.11	4.7	5.82	-0.411	0.715	1.13	6.18e-06	1.44e-18	0.287	0.000127	1.68e-08	4.89e-18	1.38e-06	0.0737	6.06e-11	1.21e-18	3.5e-18	2.28e-19	2.13e-05	5.03e-08	2.16e-10	2.9e-05	1.74e-17	0.333	0.000295	7.81e-08	6.62e-17	4.48e-06	0.117	5.24e-10	2.97e-17	5.5e-17	7.52e-18	5.67e-05	1.03e-06	1.93e-09	FALSE	TRUE	FALSE
P22413	ENPP1	NA	NA	NA	NA	NA	NA	NA	NA	NA	0.263	2.43	0.393	2.17	0.129	-2.04	NA	NA	NA	NA	NA	NA	NA	NA	NA	0.08	2.55e-07	0.0177	6.03e-07	0.352	9.55e-07	NA	NA	NA	NA	NA	NA	NA	NA	NA	0.0888	4.35e-07	0.0206	2.23e-06	0.47	3.31e-06	FALSE	FALSE	FALSE
P22415	USF1	-0.823	-1.99	NA	-0.788	0.749	-1.17	NA	0.0352	1.57	NA	1.2	2.74	NA	NA	1.54	0.172	0.0146	NA	0.24	0.26	0.0363	NA	0.946	0.0358	NA	0.0639	0.00504	NA	NA	0.057	0.234	0.0159	NA	0.292	0.312	0.0394	NA	0.961	0.0524	NA	0.0691	0.00612	NA	NA	0.0788	FALSE	FALSE	FALSE
P22670	RFX1	-1.21	-4.79	-0.592	-0.93	-0.347	-3.58	0.615	0.277	0.861	4.19	3.86	4.44	-0.338	0.246	0.583	4.31e-06	3.18e-13	0.00256	5.98e-05	0.0478	1.2e-11	0.00195	0.104	0.000123	1.67e-12	4.76e-12	8.18e-13	0.053	0.145	0.00285	2.13e-05	1e-12	0.00419	0.000147	0.0666	3.47e-11	0.00363	0.157	0.000279	6.86e-12	1.6e-11	3.48e-12	0.0749	0.237	0.00494	TRUE	TRUE	FALSE
P22694	PRKACB	-0.852	-4.3	-2.01	-1.58	-2.51	-3.45	-1.16	-0.724	-1.66	2.29	2.73	1.79	0.436	-0.504	-0.94	0.0592	2.46e-07	0.000371	0.00491	5.33e-05	2.46e-06	0.0151	0.139	0.0016	0.000122	6.99e-05	0.00093	0.358	0.241	0.0622	0.0927	3.68e-07	0.000699	0.00848	0.000123	3.58e-06	0.0239	0.202	0.00298	0.000173	9.27e-05	0.00121	0.415	0.352	0.0851	FALSE	TRUE	TRUE
P22735	TGM1	0.179	0.6	1.14	0.897	1.05	0.422	0.961	0.718	0.872	0.539	0.297	0.45	-0.243	-0.0895	0.153	0.0886	3.59e-05	3.35e-08	5.23e-07	8.68e-08	0.000828	2.4e-07	5.83e-06	7.2e-07	9.91e-05	0.00932	0.000488	0.0267	0.373	0.138	0.133	4.53e-05	1.23e-07	1.97e-06	3.5e-07	0.000985	9.16e-07	2.45e-05	2.46e-06	0.000142	0.0106	0.000654	0.0399	0.491	0.175	FALSE	FALSE	TRUE
P23142	FBLN1	0.0736	-2.2	-0.123	0.96	-0.0345	-2.27	-0.196	0.887	-0.108	2.08	3.16	2.16	1.08	0.0881	-0.995	0.812	1.16e-05	0.693	0.0154	0.911	8.37e-06	0.53	0.0229	0.728	2.01e-05	9.18e-07	1.35e-05	0.00792	0.776	0.0128	0.853	1.5e-05	0.733	0.0242	0.927	1.15e-05	0.592	0.0421	0.764	3.13e-05	1.48e-06	2.13e-05	0.0131	0.842	0.0199	FALSE	TRUE	FALSE
P23193	TCEA1	-0.507	-4.64	-0.0172	-0.558	0.562	-4.13	0.49	-0.0509	1.07	4.62	4.08	5.2	-0.54	0.58	1.12	9.08e-05	3.87e-16	0.852	3.65e-05	3.36e-05	1.67e-15	0.000125	0.583	3.05e-08	4.06e-16	1.96e-15	9.1e-17	4.94e-05	2.5e-05	1.77e-08	0.000309	2.28e-15	0.876	9.36e-05	8.07e-05	1.07e-14	0.000279	0.666	1.38e-07	3.9e-15	1.3e-14	9.93e-16	0.000124	0.000183	9.15e-08	FALSE	TRUE	FALSE
P23219	PTGS1	-0.199	-3.49	-3.13	-1.16	-3.41	-3.29	-2.94	-0.958	-3.21	0.358	2.33	0.0849	1.98	-0.273	-2.25	0.332	2.44e-10	9.13e-10	6.02e-05	3.3e-10	4.99e-10	2.02e-09	0.000331	6.87e-10	0.0931	3.08e-08	0.674	2.11e-07	0.19	4.76e-08	0.408	5.08e-10	4.69e-09	0.000148	2.25e-09	1.14e-09	1.26e-08	0.000946	4.5e-09	0.103	5.91e-08	0.691	8.71e-07	0.294	2.22e-07	FALSE	TRUE	TRUE
P23258	TUBG1	-0.136	-0.909	-0.139	0.0957	-0.338	-0.773	-0.00265	0.232	-0.202	0.77	1	0.571	0.234	-0.199	-0.434	0.0464	2.28e-09	0.0429	0.145	0.000114	1.58e-08	0.966	0.00247	0.0062	1.65e-08	6.78e-10	5.2e-07	0.00228	0.00673	1e-05	0.0749	4.21e-09	0.0576	0.186	0.00025	2.92e-08	0.973	0.00585	0.0104	3.71e-08	1.62e-09	9.75e-07	0.00419	0.0193	2.8e-05	FALSE	FALSE	FALSE
P23284	PPIB	-0.376	-4.33	-2.81	-1.45	-2.74	-3.95	-2.44	-1.08	-2.36	1.52	2.88	1.59	1.36	0.0732	-1.28	0.000165	4.95e-17	1.17e-14	4.46e-11	1.63e-14	1.57e-16	7.14e-14	1.74e-09	1.05e-13	2.63e-11	8.81e-15	1.47e-11	1.05e-10	0.325	2.08e-10	0.000524	3.84e-16	2.19e-13	5.28e-10	3.19e-13	1.32e-15	1.45e-12	1.91e-08	1.97e-12	8.92e-11	4.93e-14	5.05e-11	1.11e-09	0.444	1.87e-09	FALSE	TRUE	TRUE
P23381	WARS	-0.514	-4.76	-0.469	0.0815	0.478	-4.25	0.0454	0.596	0.993	4.29	4.84	5.24	0.55	0.947	0.397	0.1	5.46e-08	0.129	0.817	0.122	7.53e-09	0.824	0.0629	0.000791	6.88e-09	4.73e-08	1.24e-09	0.0816	0.00108	0.19	0.147	8.72e-08	0.161	0.85	0.157	1.45e-08	0.855	0.102	0.00155	1.64e-08	8.83e-08	3.23e-09	0.11	0.0042	0.235	FALSE	TRUE	FALSE
P23396	RPS3	0.333	2.63	0.717	0.395	0.52	2.3	0.384	0.0625	0.188	-1.92	-2.24	-2.11	-0.322	-0.197	0.125	2.33e-11	1.02e-22	1.51e-15	2.73e-12	8.6e-14	5.67e-22	3.83e-12	0.00149	2.38e-08	5.78e-21	8.04e-22	1.67e-21	3.48e-11	1.39e-08	2.32e-06	8.57e-10	1.37e-20	3.76e-14	4.67e-11	1.4e-12	7.45e-20	4.91e-11	0.00371	1.1e-07	5.84e-19	9.48e-20	1.71e-19	4.25e-10	3.78e-07	7.51e-06	FALSE	TRUE	FALSE
P23458	JAK1	-0.191	-2.63	-1.68	-0.767	-1.56	-2.44	-1.49	-0.576	-1.37	0.949	1.86	1.07	0.912	0.119	-0.793	0.361	2.38e-08	2.79e-06	0.00254	5.84e-06	1.59e-08	3.06e-06	0.00772	7.04e-06	0.000209	2.99e-07	7.44e-05	0.000291	0.521	0.000885	0.438	3.92e-08	7.29e-06	0.00464	1.59e-05	2.93e-08	9.19e-06	0.0159	1.97e-05	0.00029	5.06e-07	0.000108	0.000638	0.63	0.00169	FALSE	TRUE	TRUE
P23490	LOR	-0.145	-0.326	0.202	0.552	0.863	-0.181	0.347	0.697	1.01	0.528	0.878	1.19	0.351	0.662	0.311	0.0906	0.00127	0.0247	1.1e-05	8.13e-08	0.0401	0.000788	9.1e-07	1.32e-08	1.74e-05	6.64e-08	1.82e-09	0.00072	1.62e-06	0.00181	0.135	0.00145	0.0347	3.16e-05	3.29e-07	0.0433	0.00155	4.62e-06	6.49e-08	2.73e-05	1.22e-07	4.64e-09	0.00147	1.84e-05	0.00326	FALSE	FALSE	FALSE
P23526	AHCY	-0.527	-4.77	-0.00987	-0.356	0.58	-4.24	0.517	0.171	1.11	4.76	4.41	5.35	-0.346	0.59	0.936	3.03e-06	6.18e-18	0.885	0.000148	1.06e-06	2.73e-17	3.7e-06	0.0243	5.54e-10	6.34e-18	1.65e-17	1.44e-18	0.00019	8.84e-07	4.21e-09	1.56e-05	6.01e-17	0.903	0.000341	3.38e-06	2.87e-16	1.09e-05	0.0442	3.75e-09	1.19e-16	1.95e-16	3.25e-17	0.000429	1.07e-05	2.59e-08	FALSE	TRUE	FALSE
P23528	CFL1	-0.34	-4.76	-0.507	-0.445	-0.0651	-4.42	-0.167	-0.105	0.275	4.25	4.31	4.69	0.0617	0.442	0.38	5.04e-08	2.38e-22	4.28e-10	2.07e-09	0.0494	6.12e-22	9.97e-05	0.004	5.7e-07	9.98e-22	8.31e-22	2.84e-22	0.0608	2.27e-09	1.37e-08	4.71e-07	2.24e-20	2.34e-09	1.41e-08	0.0686	7.77e-20	0.000226	0.0089	1.98e-06	1.4e-19	9.5e-20	4.6e-20	0.0845	9.63e-08	7.3e-08	FALSE	TRUE	FALSE
P23921	RRM1	-0.458	-4.94	-0.546	-0.363	-0.0892	-4.48	-0.0882	0.0945	0.368	4.39	4.58	4.85	0.183	0.457	0.274	0.00335	1.36e-14	0.000921	0.0138	0.496	4.63e-14	0.5	0.471	0.0127	5.95e-14	3.56e-14	1.71e-14	0.175	0.0034	0.051	0.00736	5.54e-14	0.00163	0.0218	0.554	2.05e-13	0.564	0.563	0.0202	3.25e-13	1.76e-13	1.02e-13	0.22	0.0109	0.0708	FALSE	TRUE	FALSE
P24385	CCND1	-0.677	-0.64	0.486	0.569	0.527	0.0361	1.16	1.25	1.2	1.13	1.21	1.17	0.0837	0.0411	-0.0426	0.0056	0.00764	0.0299	0.019	0.0208	0.795	7.53e-06	1.08e-05	5.56e-06	9.89e-06	1.39e-05	7.25e-06	0.592	0.768	0.784	0.0116	0.00844	0.0414	0.0293	0.0313	0.801	2.09e-05	4.31e-05	1.59e-05	1.59e-05	1.98e-05	1.19e-05	0.64	0.836	0.814	FALSE	FALSE	FALSE
P24390	KDELR1	-2.33	-6.25	-5.45	-2.3	-4.56	-3.93	-3.12	0.0254	-2.24	0.805	3.95	1.69	3.15	0.883	-2.26	3.16e-08	1.71e-13	9.64e-13	3.59e-08	8.78e-12	5.68e-11	9.45e-10	0.899	5e-08	0.00134	5.25e-11	1.21e-06	8.57e-10	0.000644	4.38e-08	3.2e-07	5.66e-13	1.05e-11	1.74e-07	8.4e-11	1.51e-10	6.46e-09	0.924	2.16e-07	0.00172	1.5e-10	2.17e-06	6.52e-09	0.00276	2.06e-07	TRUE	TRUE	TRUE
P24468	NR2F2	0.0686	-1.73	-0.537	0.154	-0.555	-1.8	-0.606	0.0853	-0.623	1.19	1.88	1.18	0.691	-0.0175	-0.709	0.179	3.69e-14	6.3e-08	0.00728	4.34e-08	2.26e-14	1.54e-08	0.101	1.1e-08	3.92e-12	1.26e-14	4.71e-12	3.2e-09	0.723	2.37e-09	0.241	1.37e-13	2.2e-07	0.0122	1.86e-07	1.07e-13	7.72e-08	0.154	5.53e-08	1.52e-11	6.86e-14	1.73e-11	2.06e-08	0.801	1.56e-08	FALSE	TRUE	FALSE
P24534	EEF1B2	-0.309	-4.34	-1.05	-0.659	-0.695	-4.04	-0.739	-0.35	-0.387	3.3	3.69	3.65	0.389	0.352	-0.0368	0.000105	2.06e-18	1.21e-10	3.25e-08	1.71e-08	5.25e-18	8.33e-09	3.23e-05	1.18e-05	6.82e-17	1.66e-17	1.88e-17	1.1e-05	2.99e-05	0.521	0.000353	2.35e-17	7.47e-10	1.59e-07	7.91e-08	7e-17	4.41e-08	0.000114	3.17e-05	8.24e-16	1.95e-16	2.46e-16	3.11e-05	0.000212	0.574	FALSE	TRUE	TRUE
P24539	ATP5PB	NA	NA	NA	NA	NA	-4.05	-5.01	-3.24	-4.45	-0.962	0.807	-0.395	1.77	0.566	-1.2	NA	NA	NA	NA	NA	4.89e-10	6.32e-11	4.06e-09	2e-10	8.18e-05	0.000321	0.0245	4.15e-07	0.00361	1.28e-05	NA	NA	NA	NA	NA	1.11e-09	5.67e-10	3.92e-08	1.53e-09	0.000118	0.000404	0.0283	1.58e-06	0.0115	3.52e-05	FALSE	FALSE	FALSE
P24666	ACP1	-0.187	-4.19	-0.206	0.032	0.457	-4.01	-0.0196	0.219	0.644	3.99	4.22	4.65	0.238	0.663	0.425	0.244	1.09e-12	0.201	0.838	0.0107	1.93e-12	0.9	0.177	0.00108	2.06e-12	9.94e-13	2.99e-13	0.144	0.00085	0.016	0.315	3.13e-12	0.242	0.866	0.017	6.36e-12	0.92	0.247	0.00205	8.32e-12	3.71e-12	1.39e-12	0.184	0.00344	0.0244	FALSE	TRUE	FALSE
P24752	ACAT1	-0.243	-1.05	-0.588	-0.173	-0.98	-0.803	-0.345	0.0707	-0.737	0.459	0.874	0.0667	0.416	-0.392	-0.807	0.0249	7.83e-08	3.88e-05	0.0953	1.67e-07	1.54e-06	0.00332	0.473	3.91e-06	0.000376	6.07e-07	0.498	0.000839	0.00133	1.46e-06	0.0434	1.23e-07	8.43e-05	0.126	6.23e-07	2.29e-06	0.00597	0.565	1.15e-05	0.000511	9.94e-07	0.516	0.00168	0.00503	4.88e-06	FALSE	TRUE	FALSE
P24821	TNC	-0.544	-1.95	-2.14	-0.876	-1.8	-1.41	-1.59	-0.333	-1.26	-0.184	1.08	0.147	1.26	0.331	-0.928	6.07e-07	1.15e-13	3.69e-14	2.31e-09	3.07e-13	6.82e-12	1.48e-12	9.49e-05	2.69e-11	0.00889	1.92e-10	0.0284	2.74e-11	0.0001	1.16e-09	4e-06	3.91e-13	5.95e-13	1.55e-08	4.22e-12	2.04e-11	2.07e-11	0.000308	2.62e-10	0.0106	4.94e-10	0.0326	3.44e-10	0.000569	8.24e-09	FALSE	TRUE	TRUE
P24863	CCNC	-0.97	-2.97	-1.62	-2.12	-1.34	-2	-0.654	-1.15	-0.367	1.35	0.851	1.64	-0.499	0.287	0.786	5.05e-05	1.6e-10	2.15e-07	9.48e-09	1.87e-06	1.88e-08	0.00148	8.98e-06	0.0418	1.7e-06	0.000171	1.97e-07	0.00905	0.101	0.00034	0.000185	3.42e-10	6.66e-07	5.29e-08	5.59e-06	3.44e-08	0.00282	3.65e-05	0.0602	3e-06	0.00022	3.88e-07	0.0148	0.178	0.000704	FALSE	TRUE	TRUE
P24928	POLR2A	-0.0542	-0.386	0.189	-0.87	0.14	-0.332	0.243	-0.815	0.194	0.575	-0.484	0.526	-1.06	-0.0492	1.01	0.03	3.02e-10	1.31e-06	1.2e-14	3.06e-05	1.9e-09	7.64e-08	2.7e-14	9.88e-07	2.18e-12	1.87e-11	6.67e-12	1e-15	0.0454	1.83e-15	0.0512	6.21e-10	3.59e-06	4.79e-13	7.43e-05	3.98e-09	3.28e-07	1.55e-12	3.26e-06	8.79e-12	5.74e-11	2.39e-11	6.14e-14	0.0941	1.04e-13	FALSE	FALSE	FALSE
P24941	CDK2	0.104	-3.2	-0.27	-0.137	0.0789	-3.3	-0.374	-0.24	-0.0246	2.93	3.06	3.28	0.134	0.349	0.215	0.535	6.61e-11	0.121	0.416	0.635	4.46e-11	0.0389	0.163	0.882	1.96e-10	1.13e-10	4.89e-11	0.426	0.0514	0.208	0.609	1.49e-10	0.151	0.475	0.683	1.19e-10	0.057	0.231	0.899	5.82e-10	3.04e-10	1.55e-10	0.481	0.104	0.253	FALSE	TRUE	FALSE
P25098	GRK2	0.681	-2.26	0.419	0.297	0.157	-2.94	-0.261	-0.384	-0.523	2.68	2.55	2.41	-0.123	-0.262	-0.139	0.306	0.00459	0.521	0.747	0.808	0.000763	0.688	0.676	0.426	0.00149	0.016	0.003	0.893	0.687	0.879	0.381	0.00511	0.571	0.791	0.839	0.00091	0.738	0.749	0.486	0.00191	0.0179	0.00372	0.913	0.77	0.896	FALSE	TRUE	FALSE
P25116	F2R	NA	NA	NA	NA	NA	NA	NA	NA	NA	1.45	NA	3.28	NA	1.83	NA	NA	NA	NA	NA	NA	NA	NA	NA	NA	3.67e-06	NA	4.02e-07	NA	6.19e-06	NA	NA	NA	NA	NA	NA	NA	NA	NA	NA	6.22e-06	NA	7.65e-07	NA	5.72e-05	NA	FALSE	FALSE	FALSE
P25205	MCM3	-0.312	-2.66	0.0441	0.198	-0.0733	-2.34	0.356	0.51	0.239	2.7	2.85	2.58	0.154	-0.117	-0.271	3.88e-05	3.2e-16	0.402	0.00194	0.174	1.56e-15	1.04e-05	2.1e-07	0.000439	2.6e-16	1.29e-16	4.57e-16	0.01	0.0385	0.000147	0.000147	1.92e-15	0.452	0.00362	0.216	1.01e-14	2.8e-05	1.26e-06	0.000898	2.63e-15	1.19e-15	4.03e-15	0.0163	0.0823	0.000328	FALSE	TRUE	FALSE
P25311	AZGP1	-0.667	1.16	0.447	0.23	0.37	1.82	1.11	0.897	1.04	-0.71	-0.927	-0.787	-0.217	-0.0764	0.14	1.13e-10	1.19e-13	1.46e-08	2.24e-05	1.3e-07	3.78e-16	1.91e-13	2.87e-12	4.66e-13	5.23e-11	1.91e-12	1.48e-11	3.99e-05	0.0505	0.00168	3.15e-09	4.04e-13	5.78e-08	6.03e-05	5.03e-07	2.79e-15	3.37e-12	8.08e-11	7.34e-12	1.69e-10	6.79e-12	5.07e-11	0.000101	0.103	0.00303	FALSE	TRUE	FALSE
P25398	RPS12	0.303	3.5	0.671	0.323	0.327	3.2	0.367	0.0205	0.0244	-2.83	-3.18	-3.17	-0.347	-0.343	0.00397	1.83e-08	8.99e-22	1.09e-12	8.44e-09	7.3e-09	2.84e-21	1.83e-09	0.419	0.337	1.34e-20	3.08e-21	3.13e-21	3.64e-09	4.18e-09	0.874	2.03e-07	6.46e-20	1.17e-11	4.78e-08	3.64e-08	2.47e-19	1.15e-08	0.509	0.395	1.12e-18	2.64e-19	2.76e-19	2.3e-08	1.4e-07	0.891	FALSE	TRUE	FALSE
P25490	YY1	-0.453	-1.99	-0.424	-0.318	-0.218	-1.54	0.0291	0.135	0.235	1.57	1.68	1.78	0.106	0.206	0.0997	5.17e-06	1.06e-13	1.03e-05	0.000167	0.0033	2.68e-12	0.639	0.0437	0.00194	2.12e-12	9.36e-13	4.54e-13	0.103	0.0048	0.123	2.49e-05	3.64e-13	2.46e-05	0.000381	0.00571	8.62e-12	0.694	0.0742	0.00357	8.58e-12	3.5e-12	2.03e-12	0.136	0.0145	0.158	FALSE	TRUE	FALSE
P25685	DNAJB1	-0.276	-4.2	-0.189	-0.0159	0.318	-3.92	0.0863	0.26	0.594	4.01	4.18	4.52	0.174	0.507	0.334	0.0114	2.11e-15	0.0638	0.867	0.00483	4.98e-15	0.372	0.0158	2.76e-05	3.79e-15	2.22e-15	8.4e-16	0.0863	0.000123	0.00349	0.0217	1.04e-14	0.0834	0.89	0.00809	2.79e-14	0.433	0.0302	6.98e-05	2.86e-14	1.45e-14	6.92e-15	0.116	0.000676	0.00595	FALSE	TRUE	FALSE
P25690	P25690	0.309	2.89	0.909	0.4	0.607	2.58	0.6	0.0911	0.298	-1.98	-2.49	-2.29	-0.509	-0.302	0.207	0.00243	4.55e-14	6.68e-08	0.00032	5.88e-06	1.89e-13	6.67e-06	0.287	0.00312	5.15e-12	2.96e-13	8.78e-13	3.53e-05	0.00287	0.0257	0.00558	1.65e-13	2.32e-07	0.00069	1.6e-05	7.4e-13	1.87e-05	0.372	0.00556	1.95e-11	1.22e-12	3.7e-12	9.09e-05	0.00951	0.0378	FALSE	TRUE	FALSE
P25705	ATP5F1A	-0.251	-3.76	-4.72	-2.84	-4.28	-3.51	-4.47	-2.59	-4.03	-0.96	0.918	-0.518	1.88	0.442	-1.44	0.000204	2.3e-18	1.28e-19	7.99e-17	4.47e-19	5.52e-18	2.56e-19	2.57e-16	9.62e-19	6.64e-11	1.16e-10	1.1e-07	1.51e-14	6.55e-07	4.44e-13	0.000631	2.58e-17	1.26e-17	1.18e-14	3.92e-17	7.33e-17	3.35e-17	5.08e-14	9.82e-17	2.11e-10	3.11e-10	2.22e-07	6.27e-13	8.5e-06	1.03e-11	FALSE	TRUE	TRUE
P25786	PSMA1	-0.82	-3.05	-0.252	-0.296	0.0229	-2.23	0.568	0.524	0.843	2.8	2.76	3.08	-0.044	0.275	0.319	6.09e-12	3.78e-19	6.5e-06	1.16e-06	0.516	2e-17	5.63e-10	1.5e-09	4.32e-12	1.13e-18	1.38e-18	3.44e-19	0.223	2.58e-06	5.06e-07	2.94e-10	5.83e-18	1.6e-05	4.05e-06	0.573	2.2e-16	4.07e-09	1.67e-08	5.31e-11	2.85e-17	2.56e-17	1.03e-17	0.272	2.74e-05	1.89e-06	FALSE	TRUE	FALSE
P25787	PSMA2	-1.04	-3.81	-0.594	-0.398	-0.291	-2.77	0.45	0.647	0.753	3.22	3.41	3.52	0.196	0.303	0.106	7.8e-09	8.08e-16	4.65e-06	0.000231	0.0027	4.6e-14	7.52e-05	1.89e-06	3.5e-07	6.88e-15	3.25e-15	2.21e-15	0.0268	0.00205	0.199	9.97e-08	4.41e-15	1.17e-05	0.000513	0.00473	2.04e-13	0.000174	8.9e-06	1.27e-06	4.79e-14	2.02e-14	1.66e-14	0.04	0.00719	0.243	TRUE	TRUE	FALSE
P25788	PSMA3	-0.808	-3.08	-0.435	-0.134	-0.19	-2.27	0.373	0.675	0.618	2.64	2.94	2.89	0.302	0.245	-0.0563	9.25e-13	4.2e-20	1.92e-09	0.000539	2.16e-05	2.01e-18	1.22e-08	8.82e-12	2.6e-11	2.92e-19	7.38e-20	9.43e-20	1.45e-07	1.47e-06	0.0756	6.47e-11	1.02e-18	9.25e-09	0.00111	5.34e-05	3.09e-17	6.29e-08	2.19e-10	2.56e-10	1.01e-17	2.7e-18	3.74e-18	6.21e-07	1.69e-05	0.102	FALSE	TRUE	FALSE
P25789	PSMA4	-1.13	-3.67	-0.576	-0.573	-0.201	-2.54	0.558	0.561	0.933	3.1	3.1	3.47	0.00324	0.376	0.372	2.51e-09	1.11e-15	5.67e-06	6.02e-06	0.0229	1.17e-13	7.96e-06	7.5e-06	2.55e-08	9.58e-15	9.45e-15	2.26e-15	0.967	0.000342	0.000368	4.05e-08	5.91e-15	1.41e-05	1.83e-05	0.0342	4.8e-13	2.2e-05	3.09e-05	1.17e-07	6.45e-14	5.27e-14	1.68e-14	0.973	0.0016	0.000756	TRUE	TRUE	FALSE
P26006	ITGA3	-0.742	-1.49	-0.912	1.43	-0.499	-0.744	-0.17	2.17	0.243	0.574	2.92	0.987	2.34	0.412	-1.93	0.0315	5.83e-05	0.00214	7.98e-05	0.0476	0.024	0.556	1.75e-05	0.405	0.0159	5.51e-08	0.000579	4.19e-07	0.0636	2.41e-06	0.0535	7.22e-05	0.00357	0.000193	0.0664	0.0263	0.617	6.64e-05	0.465	0.0187	1.02e-07	0.000772	1.6e-06	0.124	7.77e-06	FALSE	TRUE	FALSE
P26038	MSN	-0.42	-5.18	-0.308	-0.482	0.0988	-4.76	0.113	-0.0612	0.519	4.87	4.69	5.28	-0.174	0.407	0.58	6.04e-10	1.08e-23	2.54e-08	1.14e-10	0.00203	3.18e-23	0.00075	0.0329	4.53e-11	2.36e-23	3.75e-23	8.51e-24	1.42e-05	9.07e-10	1.14e-11	1.19e-08	3.32e-21	9.49e-08	1.15e-09	0.00364	1.17e-20	0.00149	0.058	4.13e-10	1.54e-20	1.32e-20	8.01e-21	3.94e-05	4.78e-08	1.59e-10	FALSE	TRUE	FALSE
P26196	DDX6	-0.167	-3.49	-1.52	-0.191	-1.32	-3.33	-1.35	-0.0243	-1.15	1.98	3.3	2.18	1.33	0.199	-1.13	0.0491	1.82e-15	6.32e-11	0.0274	3.54e-10	3.39e-15	2.65e-10	0.757	1.83e-09	2.36e-12	3.71e-15	7.13e-13	3.31e-10	0.0228	2.37e-09	0.0786	9.08e-15	4.26e-10	0.0409	2.39e-09	2.01e-14	2.04e-09	0.816	1.09e-08	9.47e-12	2.27e-14	3.08e-12	2.94e-09	0.0537	1.56e-08	FALSE	TRUE	TRUE
P26358	DNMT1	-0.426	-3.39	-1.25	-0.724	-1.08	-2.97	-0.822	-0.298	-0.649	2.14	2.67	2.32	0.524	0.173	-0.351	0.000198	6.67e-15	1.68e-09	9.51e-07	1e-08	3.62e-14	2.28e-07	0.00326	3.09e-06	2.13e-12	1.37e-13	8.08e-13	2.81e-05	0.0569	0.000985	0.000614	2.91e-14	8.16e-09	3.37e-06	4.83e-08	1.64e-13	8.74e-07	0.00744	9.32e-06	8.6e-12	6.06e-13	3.45e-12	7.35e-05	0.113	0.00186	FALSE	TRUE	TRUE
P26367	PAX6	-0.301	-0.159	-1.17	-0.5	-0.929	0.142	-0.868	-0.198	-0.628	-1.01	-0.34	-0.77	0.67	0.24	-0.429	0.0118	0.145	4.86e-08	0.000327	6.69e-07	0.19	1.42e-06	0.0759	4.06e-05	2.62e-07	0.00572	5.14e-06	2.15e-05	0.0362	0.00112	0.0225	0.152	1.74e-07	0.000701	2.23e-06	0.199	4.61e-06	0.12	9.94e-05	5.14e-07	0.00656	8.55e-06	5.72e-05	0.0788	0.0021	FALSE	FALSE	TRUE
P26373	RPL13	0.0128	2.31	0.348	0.223	0.32	2.29	0.335	0.211	0.307	-1.96	-2.08	-1.99	-0.124	-0.0282	0.0961	0.681	2.91e-18	4.73e-08	6.47e-06	1.26e-07	3.13e-18	7.33e-08	1.19e-05	2.01e-07	2.32e-17	1.06e-17	1.93e-17	0.00136	0.372	0.00779	0.745	3.15e-17	1.7e-07	1.95e-05	4.89e-07	4.51e-17	3.16e-07	4.7e-05	7.69e-07	3.3e-16	1.33e-16	2.51e-16	0.00261	0.489	0.0125	FALSE	TRUE	FALSE
P26447	S100A4	-0.216	1.23	-0.408	-0.0758	-0.106	1.45	-0.193	0.14	0.11	-1.64	-1.31	-1.34	0.333	0.303	-0.03	2.53e-05	2.73e-14	2.26e-08	0.0424	0.00787	3.57e-15	7.42e-05	0.00117	0.00627	7.37e-16	1.29e-14	9.66e-15	2.44e-07	7.05e-07	0.388	0.000102	1.05e-13	8.57e-08	0.0608	0.0127	2.1e-14	0.000172	0.00296	0.0105	6.51e-15	6.97e-14	6e-14	9.84e-07	8.9e-06	0.441	FALSE	TRUE	FALSE
P26572	MGAT1	NA	NA	NA	NA	NA	-3.48	-2.66	-1.33	-2.13	0.825	2.15	1.35	1.32	0.524	-0.798	NA	NA	NA	NA	NA	3.75e-09	4.81e-08	2.31e-05	3.68e-07	0.000432	1.23e-07	8.11e-06	9.65e-06	0.00816	0.00055	NA	NA	NA	NA	NA	7.56e-09	2.16e-07	8.49e-05	1.33e-06	0.000583	2.18e-07	1.31e-05	2.77e-05	0.0228	0.00109	FALSE	FALSE	FALSE
P26583	HMGB2	-0.517	-4.61	-0.582	-0.624	-0.148	-4.09	-0.0647	-0.106	0.369	4.03	3.99	4.46	-0.0414	0.434	0.475	9.46e-09	1.2e-20	2.3e-09	1e-09	0.00254	5.45e-20	0.126	0.019	4.7e-07	6.67e-20	7.61e-20	1.82e-20	0.315	7.45e-08	2.57e-08	1.18e-07	3.86e-19	1.09e-08	7.58e-09	0.00446	1.83e-18	0.166	0.0356	1.66e-06	3.46e-18	2.73e-18	1.05e-18	0.369	1.41e-06	1.27e-07	FALSE	TRUE	FALSE
P26639	TARS	-0.472	-4.66	-0.0979	-0.128	0.512	-4.19	0.374	0.345	0.984	4.56	4.53	5.17	-0.03	0.609	0.639	0.000276	7.27e-16	0.323	0.203	0.000136	2.81e-15	0.00178	0.00321	1.49e-07	9.51e-16	1.03e-15	1.94e-16	0.758	2.58e-05	1.59e-05	0.000813	4e-15	0.371	0.251	0.000294	1.71e-14	0.00332	0.00733	5.84e-07	8.21e-15	7.34e-15	1.95e-15	0.792	0.000187	4.31e-05	FALSE	TRUE	FALSE
P26640	VARS	-0.783	-4.34	-1.49	-0.638	-1.07	-3.56	-0.708	0.145	-0.291	2.85	3.7	3.26	0.852	0.416	-0.436	9.89e-10	4.61e-19	3.4e-13	1.15e-08	2.03e-11	5.76e-18	3.35e-09	0.0122	5.95e-05	9.61e-17	3.47e-18	1.7e-17	3.51e-10	1.53e-06	9.21e-07	1.79e-08	6.72e-18	4.2e-12	6.29e-08	1.78e-10	7.58e-17	1.95e-08	0.024	0.000142	1.1e-15	5.5e-17	2.29e-16	3.1e-09	1.74e-05	3.2e-06	FALSE	TRUE	TRUE
P26641	EEF1G	-0.637	-4.78	-1.44	-0.796	-0.749	-4.15	-0.806	-0.159	-0.112	3.34	3.99	4.04	0.647	0.695	0.0472	6.53e-09	7.15e-20	2.75e-13	4.43e-10	9.32e-10	4.39e-19	3.8e-10	0.00519	0.0344	6.83e-18	7.21e-19	6.21e-19	5.42e-09	2.33e-09	0.336	8.72e-08	1.54e-18	3.49e-12	3.78e-09	5.62e-09	9.13e-18	2.85e-09	0.0112	0.0506	1.26e-16	1.48e-17	1.64e-17	3.26e-08	9.63e-08	0.388	FALSE	TRUE	TRUE
P26885	FKBP2	NA	NA	NA	NA	NA	-5.45	2.1	0.23	0.196	7.55	5.68	5.65	-1.87	-1.91	-0.0333	NA	NA	NA	NA	NA	2.47e-07	8.3e-05	0.157	0.297	1.6e-07	2.03e-07	6.31e-07	0.000141	0.00025	0.85	NA	NA	NA	NA	NA	4e-07	0.00019	0.223	0.354	3.22e-07	3.52e-07	1.17e-06	0.000325	0.00122	0.872	FALSE	FALSE	FALSE
P27105	STOM	-0.332	-3.92	-3.36	-1.38	-3.25	-3.59	-3.02	-1.05	-2.92	0.568	2.54	0.677	1.98	0.109	-1.87	0.00212	1.88e-15	1.35e-14	8.54e-10	2.06e-14	5.74e-15	5.03e-14	2.3e-08	8e-14	1.99e-05	4.45e-13	3.22e-06	1.04e-11	0.228	2.12e-11	0.00494	9.33e-15	2.45e-13	6.6e-09	3.91e-13	3.16e-14	1.08e-12	1.74e-07	1.55e-12	3.11e-05	1.75e-12	5.49e-06	1.51e-10	0.338	2.64e-10	FALSE	TRUE	TRUE
P27348	YWHAQ	-0.576	-4.18	-0.684	0.404	-0.49	-3.6	-0.108	0.98	0.0865	3.49	4.58	3.69	1.09	0.195	-0.894	0.0074	9.43e-12	0.00239	0.0444	0.0184	5.94e-11	0.561	0.000128	0.641	8.65e-11	2.98e-12	4.43e-11	4.81e-05	0.303	0.000291	0.0148	2.38e-11	0.00394	0.0633	0.0279	1.56e-10	0.622	0.000401	0.689	2.7e-10	1.03e-11	1.42e-10	0.000121	0.42	0.000611	FALSE	TRUE	FALSE
P27361	MAPK3	0.299	-3.12	0.499	0.187	0.493	-3.42	0.2	-0.112	0.194	3.62	3.31	3.61	-0.312	-0.00597	0.306	0.116	2.62e-10	0.0148	0.311	0.0158	8.49e-11	0.28	0.538	0.294	4.21e-11	1.28e-10	4.3e-11	0.102	0.974	0.108	0.165	5.42e-10	0.0215	0.367	0.0242	2.19e-10	0.338	0.625	0.351	1.38e-10	3.39e-10	1.38e-10	0.135	0.982	0.14	FALSE	TRUE	FALSE
P27448	MARK3	-0.448	0.179	-0.927	-0.197	-0.915	0.627	-0.479	0.251	-0.467	-1.11	-0.377	-1.09	0.73	0.012	-0.718	4.55e-08	0.000538	6.62e-12	0.00024	7.78e-12	8.16e-10	2.06e-08	2.55e-05	2.77e-08	7.26e-13	3.33e-07	8.32e-13	1.28e-10	0.763	1.57e-10	4.32e-07	0.000627	5.69e-11	0.000533	7.6e-11	1.8e-09	9.97e-08	9.27e-05	1.26e-07	3.26e-12	5.61e-07	3.54e-12	1.31e-09	0.833	1.49e-09	FALSE	FALSE	FALSE
P27635	RPL10	0.139	1.65	0.344	0.374	0.433	1.51	0.206	0.235	0.295	-1.31	-1.28	-1.22	0.0291	0.0888	0.0597	2.3e-06	1.35e-19	5.16e-11	1.89e-11	2.99e-12	4.11e-19	2.62e-08	5.45e-09	3.52e-10	2.63e-18	3.5e-18	6.42e-18	0.114	0.00019	0.00418	1.22e-05	2.54e-18	3.59e-10	2.54e-10	3.21e-11	8.75e-18	1.25e-07	4.97e-08	2.51e-09	5.95e-17	5.5e-17	1.04e-16	0.148	0.000987	0.00705	FALSE	TRUE	FALSE
P27694	RPA1	-0.216	1.93	-0.00615	-0.87	-0.314	2.15	0.21	-0.654	-0.0979	-1.94	-2.8	-2.25	-0.864	-0.308	0.556	0.000203	1.62e-15	0.886	3.6e-11	5.35e-06	4.24e-16	0.000261	1.2e-09	0.0372	1.56e-15	1.46e-17	2.41e-16	3.93e-11	6.59e-06	8.41e-09	0.000626	8.19e-15	0.904	4.39e-10	1.47e-05	3.09e-15	0.000555	1.37e-08	0.0541	1.28e-14	1.77e-16	2.34e-15	4.76e-10	6.02e-05	4.74e-08	FALSE	TRUE	FALSE
P27695	APEX1	-0.524	-4.27	-1.3	-0.875	-0.999	-3.75	-0.773	-0.351	-0.475	2.98	3.4	3.27	0.422	0.298	-0.124	2.51e-08	1.06e-19	3.75e-13	5.04e-11	9.79e-12	5.58e-19	2.32e-10	2.31e-06	7.88e-08	1.05e-17	1.95e-18	3.11e-18	3.08e-07	1.3e-05	0.0141	2.66e-07	2.1e-18	4.56e-12	5.8e-10	9.27e-11	1.11e-17	1.82e-09	1.06e-05	3.25e-07	1.73e-16	3.44e-17	5.87e-17	1.21e-06	0.000107	0.0217	FALSE	TRUE	TRUE
P27707	DCK	-0.655	-2.71	NA	-0.661	-0.756	-2.06	NA	-0.00588	-0.1	NA	2.05	1.96	NA	NA	-0.0944	0.0609	5.8e-05	NA	0.0592	0.0731	0.000258	NA	0.984	0.781	NA	0.000262	0.00113	NA	NA	0.794	0.0952	7.19e-05	NA	0.0823	0.0982	0.000317	NA	0.989	0.811	NA	0.000331	0.00146	NA	NA	0.824	FALSE	TRUE	FALSE
P27708	CAD	-0.0775	-0.873	0.314	0.166	0.301	-0.795	0.392	0.244	0.379	1.19	1.04	1.17	-0.148	-0.0132	0.135	0.00129	1.49e-15	5.15e-10	8.92e-07	8.68e-10	4.83e-15	3.43e-11	1.09e-08	5.23e-11	3.03e-17	1.64e-16	3.49e-17	3.19e-06	0.497	8.53e-06	0.00315	7.6e-15	2.78e-09	3.19e-06	5.25e-09	2.72e-14	3.34e-10	9.28e-08	4.6e-10	4.14e-16	1.49e-15	4.23e-16	1.01e-05	0.607	2.42e-05	FALSE	FALSE	FALSE
P27797	CALR	-0.904	-3.73	-1.48	-0.579	-1.95	-2.82	-0.58	0.326	-1.04	2.24	3.15	1.78	0.906	-0.461	-1.37	8.43e-12	1.46e-19	1.68e-14	2.03e-09	5.52e-16	4.96e-18	1.96e-09	1.57e-06	1.45e-12	9.2e-17	1.24e-18	1.7e-15	8.23e-12	3.05e-08	4.76e-14	3.86e-10	2.66e-18	2.95e-13	1.39e-08	1.6e-14	6.7e-17	1.23e-08	7.48e-06	1.98e-11	1.07e-15	2.36e-17	1.32e-14	1.22e-10	6.72e-07	1.52e-12	FALSE	TRUE	TRUE
P27816	MAP4	-0.365	-3.46	-0.641	-0.688	-0.374	-3.09	-0.276	-0.323	-0.00847	2.82	2.77	3.08	-0.0465	0.268	0.314	5.03e-05	1.15e-16	1.25e-07	5.55e-08	4.04e-05	4.74e-16	0.000607	0.00016	0.892	1.55e-15	1.91e-15	4.91e-16	0.46	0.000781	0.000203	0.000185	7.86e-16	4.09e-07	2.55e-07	9.56e-05	3.42e-15	0.00122	0.000488	0.908	1.27e-14	1.28e-14	4.28e-15	0.515	0.00322	0.00044	FALSE	TRUE	FALSE
P27824	CANX	-0.606	-3.03	-4.97	-2.8	-4.54	-2.43	-4.37	-2.19	-3.93	-1.94	0.238	-1.5	2.18	0.437	-1.74	1e-06	3.03e-15	5.81e-18	8.51e-15	1.86e-17	5.03e-14	3.02e-17	1.84e-13	1.15e-16	8.54e-13	0.00457	2.06e-11	1.99e-13	3.04e-05	3.3e-12	6.04e-06	1.43e-14	3.27e-16	3.89e-13	8.88e-16	2.21e-13	1.75e-15	7.83e-12	5.41e-15	3.73e-12	0.00528	6.91e-11	5.63e-12	0.000215	5.74e-11	FALSE	TRUE	TRUE
P28066	PSMA5	-1.07	-2.9	-0.701	-0.156	-0.358	-1.84	0.365	0.909	0.708	2.2	2.75	2.54	0.544	0.343	-0.201	2.02e-07	1.08e-12	1.85e-05	0.164	0.00507	3.14e-10	0.00445	1.19e-06	1.67e-05	3.37e-11	2.16e-12	5.58e-12	0.000203	0.00662	0.0801	1.56e-06	3.09e-12	4.24e-05	0.207	0.00845	7.35e-10	0.00782	5.82e-06	4.38e-05	1.12e-10	7.62e-12	2.02e-11	0.000454	0.019	0.107	TRUE	TRUE	FALSE
P28070	PSMB4	-0.772	-3.4	-0.403	-0.186	0.154	-2.63	0.369	0.586	0.926	3	3.22	3.56	0.216	0.557	0.341	2.28e-10	1.84e-18	5.01e-07	0.000911	0.00361	4.83e-17	1.3e-06	6.48e-09	2.42e-11	9.12e-18	3.77e-18	1.05e-18	0.000264	1.18e-08	3.14e-06	5.76e-09	2.15e-17	1.46e-06	0.00178	0.0062	4.72e-16	4.26e-06	5.83e-08	2.39e-10	1.56e-16	5.83e-17	2.52e-17	0.000581	3.38e-07	9.8e-06	FALSE	TRUE	FALSE
P28072	PSMB6	-0.877	-2.9	-0.405	-0.37	0.0476	-2.02	0.472	0.507	0.925	2.5	2.53	2.95	0.0349	0.453	0.418	2.61e-10	8.03e-17	2.14e-06	5.58e-06	0.357	7.64e-15	4.01e-07	1.79e-07	1.36e-10	5.4e-16	4.53e-16	6.53e-17	0.496	6.33e-07	1.53e-06	6.25e-09	5.79e-16	5.68e-06	1.7e-05	0.416	4.05e-14	1.46e-06	1.1e-06	1.08e-09	4.96e-15	3.62e-15	7.44e-16	0.55	8.26e-06	5.12e-06	FALSE	TRUE	FALSE
P28074	PSMB5	-0.82	-3.25	-0.0854	-0.34	0.0339	-2.43	0.734	0.48	0.854	3.16	2.91	3.28	-0.254	0.119	0.374	5.72e-14	1.53e-21	0.00328	3.11e-09	0.176	6.19e-20	2.28e-13	4.61e-11	3.43e-14	2.15e-21	6.25e-21	1.34e-21	9.46e-08	0.00024	9.84e-10	7.83e-12	9.15e-20	0.00527	2.01e-08	0.218	2e-18	3.86e-12	8.34e-10	7.56e-13	2.65e-19	4.91e-19	1.55e-19	4.21e-07	0.00119	7.14e-09	FALSE	TRUE	FALSE
P28288	ABCD3	NA	NA	NA	NA	NA	NA	NA	NA	NA	-1.43	0.974	-1.04	2.4	0.388	-2.01	NA	NA	NA	NA	NA	NA	NA	NA	NA	3.07e-07	7.06e-06	4.2e-06	3.68e-09	0.00469	1.67e-08	NA	NA	NA	NA	NA	NA	NA	NA	NA	5.96e-07	1.03e-05	7.06e-06	2.32e-08	0.0142	8.72e-08	FALSE	FALSE	FALSE
P28330	ACADL	NA	NA	NA	NA	NA	NA	NA	NA	NA	NA	NA	4.02	NA	NA	NA	NA	NA	NA	NA	NA	NA	NA	NA	NA	NA	NA	1.33e-06	NA	NA	NA	NA	NA	NA	NA	NA	NA	NA	NA	NA	NA	NA	2.35e-06	NA	NA	NA	FALSE	FALSE	FALSE
P28331	NDUFS1	NA	NA	NA	NA	NA	NA	NA	NA	NA	-0.765	1.08	-0.531	1.84	0.234	-1.61	NA	NA	NA	NA	NA	NA	NA	NA	NA	7.25e-06	4.37e-07	0.000122	4.61e-09	0.0185	1.48e-08	NA	NA	NA	NA	NA	NA	NA	NA	NA	1.19e-05	7.28e-07	0.000174	2.83e-08	0.0454	7.81e-08	FALSE	FALSE	FALSE
P28340	POLD1	-0.512	-3.25	-0.573	-1.41	-0.814	-2.73	-0.0612	-0.893	-0.302	2.67	1.84	2.43	-0.832	-0.241	0.591	0.00286	8.07e-12	0.00126	1.93e-07	6.17e-05	6.78e-11	0.667	2.5e-05	0.0494	8.97e-11	8.31e-09	2.86e-10	5.01e-05	0.108	0.000989	0.00642	2.06e-11	0.00218	7.89e-07	0.000141	1.77e-10	0.721	9.13e-05	0.0702	2.8e-10	1.7e-08	8.16e-10	0.000125	0.186	0.00187	FALSE	TRUE	FALSE
P28347	TEAD1	-0.13	-2.3	-0.499	-0.055	-0.2	-2.17	-0.369	0.0752	-0.0701	1.8	2.24	2.1	0.444	0.299	-0.145	0.141	9.41e-13	4.7e-05	0.519	0.0314	1.95e-12	0.000688	0.381	0.413	2e-11	1.27e-12	2.95e-12	0.00014	0.00331	0.103	0.196	2.73e-12	0.000101	0.577	0.0456	6.41e-12	0.00137	0.471	0.474	6.91e-11	4.67e-12	1.12e-11	0.000323	0.0107	0.135	FALSE	TRUE	FALSE
P28482	MAPK1	-0.488	-4.61	-0.659	-0.33	-0.245	-4.12	-0.171	0.158	0.243	3.95	4.27	4.36	0.329	0.414	0.085	6.05e-05	1.53e-16	2.86e-06	0.00166	0.0115	6.34e-16	0.0607	0.0812	0.0123	1.08e-15	3.94e-16	3.07e-16	0.00172	0.000272	0.326	0.000215	1.02e-15	7.46e-06	0.00313	0.018	4.49e-15	0.0853	0.127	0.0195	9.22e-15	3.2e-15	2.87e-15	0.00324	0.0013	0.376	FALSE	TRUE	FALSE
P28702	RXRB	-0.969	-5.3	-0.739	-2.2	-1.67	-4.33	0.231	-1.24	-0.699	4.56	3.09	3.63	-1.47	-0.93	0.536	0.308	5.61e-05	0.391	0.0223	0.0692	0.000301	0.785	0.164	0.416	7.82e-05	0.0016	0.000498	0.0734	0.235	0.483	0.383	6.97e-05	0.442	0.0339	0.0936	0.000369	0.823	0.231	0.476	0.000113	0.00191	0.000667	0.1	0.345	0.537	FALSE	TRUE	FALSE
P28749	RBL1	-0.61	-2.55	-0.674	-0.658	-0.683	-1.94	-0.0641	-0.0479	-0.0729	1.88	1.89	1.87	0.0163	-0.00873	-0.025	7.05e-07	1.98e-14	2.29e-07	3.02e-07	1.98e-07	6.13e-13	0.361	0.492	0.302	9.34e-13	8.38e-13	9.9e-13	0.814	0.899	0.718	4.53e-06	7.75e-14	7.04e-07	1.2e-06	7.33e-07	2.2e-12	0.423	0.583	0.358	4.06e-12	3.17e-12	4.14e-12	0.842	0.93	0.755	FALSE	TRUE	FALSE
P28838	LAP3	-0.215	-3.62	0.585	-0.0422	-0.601	-3.4	0.801	0.173	-0.386	4.2	3.57	3.02	-0.628	-1.19	-0.559	0.784	0.000714	0.401	0.95	0.362	0.00101	0.261	0.799	0.551	7.07e-05	0.000191	0.000272	0.279	0.0462	0.29	0.829	0.000827	0.451	0.959	0.421	0.0012	0.317	0.847	0.608	0.000103	0.000244	0.000373	0.331	0.0957	0.34	FALSE	TRUE	FALSE
P28906	CD34	NA	NA	NA	NA	NA	NA	NA	NA	NA	NA	NA	NA	2.16	0.238	-1.93	NA	NA	NA	NA	NA	NA	NA	NA	NA	NA	NA	NA	0.000582	0.433	0.00106	NA	NA	NA	NA	NA	NA	NA	NA	NA	NA	NA	NA	0.0012	0.549	0.00198	FALSE	FALSE	FALSE
P29084	GTF2E2	-0.127	-1.53	0.00964	-0.549	-0.27	-1.4	0.137	-0.422	-0.143	1.54	0.978	1.26	-0.558	-0.28	0.278	0.313	1.42e-08	0.938	0.000581	0.0436	3.95e-08	0.279	0.00408	0.257	1.32e-08	2.26e-06	1.38e-07	0.000503	0.0377	0.0386	0.388	2.41e-08	0.948	0.00119	0.0616	6.97e-08	0.336	0.00906	0.31	3.02e-08	3.46e-06	2.77e-07	0.00105	0.0812	0.055	FALSE	TRUE	FALSE
P29144	TPP2	-0.692	-4.86	-0.156	-0.436	0.485	-4.17	0.536	0.256	1.18	4.7	4.42	5.35	-0.28	0.641	0.921	8.5e-08	2.65e-18	0.0296	1.33e-05	4.42e-06	1.86e-17	1.51e-06	0.00154	1.47e-10	4.01e-18	8.74e-18	7.93e-19	0.000766	2.04e-07	2.9e-09	7.38e-07	2.92e-17	0.041	3.74e-05	1.23e-05	2.07e-16	4.89e-06	0.00379	1.15e-09	8.64e-17	1.16e-16	2.03e-17	0.00155	3.26e-06	1.85e-08	FALSE	TRUE	FALSE
P29218	IMPA1	-0.696	-4.98	0.205	-0.731	0.585	-4.29	0.901	-0.035	1.28	5.19	4.25	5.57	-0.936	0.38	1.32	0.0368	4.12e-09	0.497	0.0298	0.0709	5.33e-10	0.0012	0.868	7.46e-05	7.17e-11	5.81e-10	3.4e-11	0.00091	0.0933	5.91e-05	0.0614	7.39e-09	0.547	0.0441	0.0957	1.21e-09	0.0023	0.903	0.000174	2.28e-10	1.4e-09	1.11e-10	0.00181	0.167	0.000142	FALSE	TRUE	FALSE
P29279	CCN2	-0.718	-2.38	-1.96	-0.642	-1.68	-1.66	-1.24	0.0762	-0.959	0.422	1.74	0.706	1.32	0.284	-1.03	0.00549	1.23e-07	9.74e-07	0.0106	4.81e-06	1.68e-06	2.99e-05	0.694	0.000299	0.0463	1.05e-06	0.003	1.7e-05	0.16	0.000156	0.0114	1.91e-07	2.71e-06	0.0173	1.34e-05	2.49e-06	7.43e-05	0.765	0.000631	0.0525	1.69e-06	0.00372	4.64e-05	0.256	0.000346	FALSE	TRUE	TRUE
P29317	EPHA2	0.119	-2.79	-2.78	-0.828	-2.29	-2.91	-2.89	-0.947	-2.41	0.0184	1.97	0.508	1.95	0.489	-1.46	0.585	8.94e-09	9.67e-09	0.00192	9.4e-08	5.43e-09	5.86e-09	0.000683	5.22e-08	0.932	5.21e-07	0.0331	5.79e-07	0.0388	1.28e-05	0.657	1.55e-08	3.98e-08	0.00358	3.76e-07	1.07e-08	3.21e-08	0.00183	2.24e-07	0.937	8.59e-07	0.0378	2.15e-06	0.0829	3.52e-05	FALSE	TRUE	TRUE
P29353	SHC1	-0.36	-2.84	-0.909	-0.136	-0.529	-2.48	-0.549	0.225	-0.169	1.93	2.7	2.31	0.774	0.38	-0.394	0.00176	1e-12	3.7e-07	0.157	7.86e-05	1.32e-12	1.98e-05	0.0161	0.0575	2.38e-11	4.84e-13	2.99e-12	6.26e-07	0.000503	0.000382	0.00418	2.89e-12	1.1e-06	0.199	0.000175	4.46e-12	5.11e-05	0.0306	0.0806	8.1e-11	1.89e-12	1.14e-11	2.31e-06	0.00221	0.000782	FALSE	TRUE	FALSE
P29372	MPG	NA	-4.89	-2.05	-0.73	NA	NA	NA	NA	NA	2.85	4.16	NA	1.32	NA	NA	NA	5.17e-07	0.000243	0.0292	NA	NA	NA	NA	NA	1.76e-05	7.19e-07	NA	0.00181	NA	NA	NA	7.5e-07	0.000468	0.0434	NA	NA	NA	NA	NA	2.75e-05	1.17e-06	NA	0.00339	NA	NA	FALSE	TRUE	TRUE
P29374	ARID4A	-0.277	-1.05	-0.149	-0.462	-0.035	-0.772	0.128	-0.186	0.242	0.899	0.586	1.01	-0.313	0.114	0.427	0.0201	2.04e-07	0.176	0.000707	0.742	5.87e-06	0.243	0.0988	0.0377	1.14e-06	9e-05	3e-07	0.0104	0.294	0.00131	0.0361	3.08e-07	0.215	0.00142	0.779	8.2e-06	0.298	0.151	0.0548	2.06e-06	0.000118	5.78e-07	0.0168	0.41	0.00242	FALSE	TRUE	FALSE
P29375	KDM5A	0.0971	1.05	0.318	0.191	-0.0313	0.952	0.221	0.0942	-0.128	-0.731	-0.858	-1.08	-0.127	-0.349	-0.223	0.649	0.000247	0.152	0.376	0.883	0.000562	0.31	0.659	0.549	0.004	0.00128	0.00019	0.555	0.119	0.306	0.715	0.000294	0.188	0.435	0.903	0.000676	0.371	0.735	0.606	0.00492	0.00154	0.000266	0.606	0.202	0.357	FALSE	TRUE	FALSE
P29401	TKT	-0.526	-4.42	-0.0743	-0.248	1.1	-3.89	0.452	0.277	1.62	4.34	4.17	5.52	-0.174	1.17	1.35	0.000806	2.81e-14	0.548	0.0603	6.19e-07	1.39e-13	0.00253	0.0389	6.66e-09	3.48e-14	5.83e-14	1.7e-15	0.173	2.97e-07	6.06e-08	0.00207	1.08e-13	0.596	0.0836	2.08e-06	5.57e-13	0.00464	0.0671	3.5e-08	2.03e-13	2.76e-13	1.32e-14	0.217	4.41e-06	2.75e-07	FALSE	TRUE	FALSE
P29508	SERPINB3	-1.08	-0.086	0.748	0.384	0.449	0.993	1.83	1.46	1.53	0.834	0.47	0.535	-0.363	-0.299	0.0649	1.11e-10	0.157	9.49e-09	1.58e-05	3.12e-06	3.08e-10	1.57e-13	2.54e-12	1.48e-12	2.58e-09	1.9e-06	4.57e-07	2.76e-05	0.000176	0.277	3.12e-09	0.163	3.91e-08	4.39e-05	8.93e-06	7.24e-10	2.89e-12	7.19e-11	2e-11	6.49e-09	2.95e-06	8.61e-07	7.23e-05	0.000922	0.326	TRUE	FALSE	FALSE
P29536	LMOD1	NA	NA	NA	NA	NA	-2.8	-4.44	-2.08	-4.6	-1.64	0.718	-1.8	2.36	-0.156	-2.52	NA	NA	NA	NA	NA	6.66e-10	1.22e-11	8.53e-09	9.04e-12	3.31e-09	3.5e-06	1.52e-09	1.45e-10	0.0525	8.33e-11	NA	NA	NA	NA	NA	1.49e-09	1.34e-10	7.5e-08	1.02e-10	8.23e-09	5.27e-06	3.91e-09	1.45e-09	0.106	8.47e-10	FALSE	FALSE	FALSE
P29590	PML	0.197	0.0375	0.955	-0.188	0.562	-0.159	0.759	-0.385	0.366	0.918	-0.226	0.525	-1.14	-0.393	0.751	0.00252	0.488	1.73e-10	0.00338	9.73e-08	0.00978	2.85e-09	6.4e-06	1.08e-05	2.82e-10	0.000892	2.14e-07	1.87e-11	5.2e-06	3.22e-09	0.00576	0.497	1.03e-09	0.00605	3.87e-07	0.0109	1.7e-08	2.67e-05	2.94e-05	8.15e-10	0.00108	4.19e-07	2.48e-10	4.93e-05	2.02e-08	FALSE	FALSE	FALSE
P29692	EEF1D	-0.309	-4.32	-1.69	-0.619	-1.06	-4.01	-1.38	-0.31	-0.747	2.63	3.7	3.26	1.07	0.63	-0.437	3.03e-07	1.74e-21	2.65e-16	7.6e-11	9.73e-14	4.47e-21	3.43e-15	2.87e-07	7.4e-12	9.38e-19	1.25e-20	6.15e-20	8.61e-14	6.19e-11	5.3e-09	2.22e-06	9.83e-20	7.86e-15	8.22e-10	1.56e-12	3.27e-19	1.1e-13	1.65e-06	8.48e-11	2.5e-17	7.72e-19	2.69e-18	2.76e-12	6.62e-09	3.17e-08	FALSE	TRUE	TRUE
P29992	GNA11	4.56	0.545	0.639	0.597	0.803	-4.01	-3.92	-3.96	-3.75	0.0944	0.0517	0.258	-0.0427	0.164	0.206	4.81e-06	0.181	0.123	0.147	0.0617	2.61e-06	3.17e-06	2.9e-06	4.47e-06	0.73	0.85	0.356	0.876	0.553	0.457	2.34e-05	0.188	0.155	0.187	0.0843	3.79e-06	9.47e-06	1.3e-05	1.31e-05	0.744	0.856	0.376	0.898	0.659	0.511	TRUE	FALSE	FALSE
P30040	ERP29	NA	NA	NA	NA	NA	NA	NA	NA	NA	2.06	NA	2.14	NA	0.0767	NA	NA	NA	NA	NA	NA	NA	NA	NA	NA	0.00144	NA	0.000262	NA	0.815	NA	NA	NA	NA	NA	NA	NA	NA	NA	NA	0.00184	NA	0.000361	NA	0.868	NA	FALSE	FALSE	FALSE
P30041	PRDX6	-0.59	-4.95	0.242	-0.263	0.667	-4.36	0.832	0.327	1.26	5.19	4.69	5.62	-0.505	0.426	0.93	0.0247	2.41e-11	0.316	0.278	0.0131	1.15e-10	0.0034	0.182	0.000125	1.33e-11	4.72e-11	5e-12	0.0489	0.0897	0.00154	0.043	5.75e-11	0.364	0.333	0.0204	2.91e-10	0.00611	0.252	0.000283	4.75e-11	1.36e-10	1.83e-11	0.0696	0.162	0.0028	FALSE	TRUE	FALSE
P30044	PRDX5	-0.563	-3.31	-0.0602	-0.522	-0.553	-2.75	0.502	0.0407	0.00907	3.25	2.79	2.76	-0.462	-0.493	-0.0317	0.0306	1.99e-08	0.795	0.042	0.0329	3.81e-09	0.00965	0.804	0.956	6.63e-10	3.27e-09	3.68e-09	0.0151	0.0107	0.847	0.0521	3.32e-08	0.825	0.0603	0.0475	7.66e-09	0.016	0.85	0.962	1.83e-09	7.09e-09	8.96e-09	0.0237	0.0285	0.869	FALSE	TRUE	FALSE
P30048	PRDX3	-2.18	-3.92	-2.37	-2.89	-2.16	-1.74	-0.192	-0.712	0.0171	1.54	1.02	1.75	-0.52	0.209	0.729	0.000304	1.61e-06	8.45e-05	0.000171	0.000167	0.000773	0.592	0.159	0.961	0.000802	0.0442	0.000336	0.264	0.515	0.13	0.000889	2.24e-06	0.000174	0.00039	0.000358	0.000922	0.651	0.226	0.966	0.00105	0.0481	0.000457	0.316	0.625	0.165	TRUE	TRUE	TRUE
P30050	RPL12	0.0475	2.59	0.432	0.387	0.424	2.55	0.384	0.34	0.376	-2.16	-2.21	-2.17	-0.0442	-0.0076	0.0366	0.354	3.03e-16	1e-06	3.23e-06	1.22e-06	3.83e-16	3.54e-06	1.27e-05	4.38e-06	3.03e-15	2.34e-15	2.9e-15	0.388	0.88	0.473	0.431	1.84e-15	2.78e-06	1.03e-05	3.81e-06	2.82e-15	1.05e-05	4.95e-05	1.28e-05	2.33e-14	1.52e-14	2.1e-14	0.444	0.915	0.526	FALSE	TRUE	FALSE
[truncated: 3,203 more rows]
[truncated: 17 more columns]
