# Supplementary material for: Competition for the conserved branch point sequence influences physiological outcomes in pre-mRNA splicing
Source: bioRxiv preprint, doi:10.1101/2024.10.09.617384, version 2 (2025-10-08)
Supplement: Suppl Table S6 [file 617384_file08.xlsx]

## Sheet: Sheet1
GENE	baseMean	log2FoldChange	lfcSE	stat	pvalue	padj	Splicing
RPS26B	6109.47	-0.070874	0.144352	-0.49098	0.623441	0.886688	Spliced
YLR118C	6057.97	-0.105107	0.144026	-0.729779	0.465525	0.804719	Intronless
VMA3	6045.35	0.0902091	0.13849	0.651375	0.514805	0.834114	Intronless
RPL16A	6044.59	-0.0849238	0.135279	-0.627769	0.530155	0.842185	Spliced
BSD2	6038.95	-0.0500816	0.147862	-0.338704	0.734832	0.932951	Intronless
CYT2	6034.28	-0.0810923	0.109591	-0.739955	0.459327	0.801683	Intronless
NAS6	6025.87	-0.0847764	0.146122	-0.580177	0.561795	0.858239	Intronless
ERP4	5951.97	0.110616	0.12679	0.872433	0.382972	0.747172	Intronless
MRPL20	5931.16	0.0414873	0.140054	0.296223	0.767059	0.943032	Intronless
TRP1	5912.35	-0.00637789	0.114287	-0.0558061	0.955496	0.998147	Intronless
ATP3	5890.34	-0.0848645	0.125742	-0.67491	0.499733	0.828885	Intronless
YOL038C-A	5881.2	-0.0557113	0.151463	-0.367822	0.713006	0.924383	Intronless
CNL1	5874.63	-0.0761606	0.1823	-0.417776	0.676111	0.912373	Intronless
MRPS17	5855.56	-0.0920473	0.17124	-0.537534	0.590899	0.872292	Intronless
BGL2	5849.01	-0.15919	0.132564	-1.20085	0.229809	0.600375	Intronless
HTZ1	5827.58	0.0802858	0.126406	0.63514	0.525337	0.83964	Intronless
CCC1	5798.63	-0.159909	0.145556	-1.09861	0.271937	0.649846	Intronless
EMC2	5781.75	0.0888676	0.155422	0.571782	0.567469	0.861555	Intronless
FMP41	5773.03	-0.115625	0.151488	-0.763261	0.445308	0.79134	Intronless
CWC21	5759.69	0.0569532	0.122932	0.463292	0.643155	0.894674	Intronless
SEH1	5753.6	-0.0873341	0.183355	-0.476313	0.633852	0.892119	Intronless
YAP1	5742.94	0.0213441	0.177857	0.120007	0.904478	0.989612	Intronless
CDC60	5741.7	-0.0744345	0.11679	-0.637337	0.523906	0.839483	Intronless
GSH2	5737.46	-0.16255	0.142519	-1.14055	0.254056	0.630195	Intronless
BDF2	5731.55	0.136091	0.122136	1.11425	0.265171	0.643788	Intronless
ADK1	5731.26	0.00324832	0.159746	0.0203343	0.983777	0.998147	Intronless
ERV1	5729.65	0.160027	0.15211	1.05205	0.292778	0.66987	Spliced
YRB2	5729.3	0.0484426	0.141495	0.342363	0.732078	0.932951	Intronless
MRPL10	5722.47	-0.234987	0.186736	-1.25839	0.208251	0.574006	Intronless
RPS0A	5720.31	-0.0595709	0.15607	-0.381694	0.702688	0.919803	Spliced
PTH2	5717.16	0.167368	0.129193	1.29549	0.195153	0.554632	Intronless
PDX1	5707.36	-0.240292	0.151985	-1.58102	0.113873	0.429638	Intronless
NSG1	5693.14	0.128669	0.163004	0.789362	0.4299	0.780696	Intronless
YBR206W	5682.66	-0.180586	0.163816	-1.10237	0.270301	0.648441	Intronless
TUM1	5676.76	0.0714637	0.154556	0.462379	0.643809	0.894881	Intronless
RPL31B	5676.31	-0.0452941	0.187004	-0.24221	0.808618	0.959299	Spliced
TUB3	5674.52	-0.170181	0.198297	-0.858211	0.390776	0.750652	Spliced
TAN1	5669.55	0.0847628	0.122923	0.689562	0.49047	0.823765	Spliced
SLM4	5663.4	-0.0341871	0.136814	-0.24988	0.80268	0.958681	Intronless
GET1	5644.63	-0.133464	0.253556	-0.526368	0.598633	0.8756	Intronless
RPS30A_2	5623.53	-0.191998	0.180796	-1.06196	0.288254	0.666994	Unspliced
VPS24	5608.07	-0.0630747	0.168495	-0.374341	0.708151	0.922401	Intronless
IMP2	5600.27	0.140152	0.17486	0.80151	0.422837	0.775819	Intronless
GLN1	5591.44	0.0364293	0.168338	0.216406	0.828672	0.966762	Intronless
MRPL9	5583.9	-0.272894	0.235038	-1.16107	0.245615	0.62024	Intronless
MRPL19	5576.15	-0.199721	0.276909	-0.721249	0.470756	0.809475	Intronless
TRP2	5570.17	-0.349073	0.430915	-0.810073	0.417898	0.773297	Intronless
YGR111W	5569.6	-0.142261	0.125569	-1.13293	0.257243	0.633644	Intronless
YSR3	5566.14	-0.0374673	0.163066	-0.229768	0.818272	0.96153	Intronless
SBH1	5565.92	0.221971	0.139503	1.59116	0.111574	0.425679	Intronless
MVD1	5565.52	-0.154653	0.210866	-0.733419	0.463303	0.804403	Intronless
IES2	5561.01	-0.0895698	0.150496	-0.595164	0.551734	0.853974	Intronless
LEO1	5559.86	-0.151792	0.17112	-0.88705	0.375052	0.740548	Intronless
UBC6	5557.46	-0.291719	0.334931	-0.870981	0.383765	0.747479	Intronless
MRPS8	5556.72	-0.297791	0.350675	-0.849195	0.395773	0.754395	Intronless
SSB2	5556.35	-0.0617094	0.200171	-0.308284	0.757866	0.939611	Intronless
SGF11	5555.84	0.127345	0.13286	0.958491	0.337815	0.709906	Intronless
RCR2	5554.22	-0.308577	0.145491	-2.12093	0.0339274	0.205983	Intronless
PRS4	5553.14	-0.0107427	0.215927	-0.0497515	0.96032	0.998147	Intronless
DDP1	5550.77	-0.0477108	0.166363	-0.286788	0.774275	0.945916	Intronless
MOG1	5537.41	0.0491378	0.156121	0.314742	0.752957	0.939443	Intronless
SEC26	5531.99	-0.148517	0.128485	-1.1559	0.247721	0.622188	Intronless
CUP9	5524.26	-0.27383	0.217225	-1.26058	0.207461	0.574006	Intronless
APN1	5521.64	0.0552043	0.128057	0.431093	0.666401	0.906512	Intronless
PPN1	5521.24	-0.175289	0.150716	-1.16305	0.244811	0.619619	Intronless
HSC82	5521.21	-0.201255	0.202437	-0.994162	0.320144	0.69676	Intronless
YOR131C	5518.8	-0.0580566	0.149157	-0.389231	0.697106	0.91772	Intronless
MIC17	5516.08	-0.0107496	0.159752	-0.0672894	0.946351	0.998147	Intronless
SDH3	5508.71	-0.13323	0.125017	-1.06569	0.286563	0.665519	Intronless
YAP1801	5504.62	-0.204885	0.179272	-1.14287	0.253091	0.628581	Intronless
YJR142W	5504.54	-0.0500319	0.148026	-0.337993	0.735368	0.932951	Intronless
DPP1	5501.19	-0.0540741	0.15454	-0.349904	0.726411	0.930027	Intronless
OCA5	5497.19	-0.0797419	0.290375	-0.274617	0.783611	0.950553	Intronless
TFG1	5495.35	-0.233654	0.157039	-1.48787	0.136785	0.466529	Intronless
EMC1	5495.03	-0.10089	0.155266	-0.649791	0.515827	0.83474	Intronless
PCM1	5494.22	-0.136662	0.172116	-0.794014	0.427187	0.779241	Intronless
EMP47	5492.2	-0.086264	0.126515	-0.681848	0.495335	0.827197	Intronless
YPR170W-B	5490.31	0.242234	0.133988	1.80788	0.0706258	0.323407	Spliced
DCW1	5487.17	-0.39638	0.29484	-1.34439	0.178822	0.530697	Intronless
LDB7	5484.27	-0.212376	0.360271	-0.589489	0.555533	0.855057	Intronless
YPR172W	5478.61	-0.266629	0.173673	-1.53523	0.124726	0.445719	Intronless
RPL24B	5478.06	-0.175501	0.320576	-0.547456	0.584066	0.869696	Spliced
RSM28	5476.9	-0.189254	0.179124	-1.05656	0.290715	0.66877	Intronless
FRA1	5475	-0.410392	0.227986	-1.80007	0.0718489	0.326659	Intronless
MRPL1	5473.5	-0.276079	0.155234	-1.77847	0.0753265	0.337315	Intronless
DAD3	5473.34	0.0498928	0.212279	0.235034	0.814182	0.960885	Intronless
YJR087W	5472.06	-0.0176301	0.236892	-0.0744224	0.940674	0.998147	Intronless
ADE2	5466.5	-0.238986	0.212698	-1.12359	0.261186	0.638581	Intronless
YNR061C	5462.57	0.0988978	0.211393	0.467838	0.639901	0.89395	Intronless
MRPL24	5458.03	-0.147455	0.159861	-0.9224	0.35632	0.724724	Intronless
COX20	5455.75	-0.180061	0.201625	-0.89305	0.371831	0.738107	Intronless
YPL257W-B	5455.12	-0.130977	0.147952	-0.885268	0.376012	0.741693	Intronless
AIM43	5450.08	-0.0898407	0.1648	-0.545149	0.585651	0.869979	Intronless
YGR017W	5448.84	-0.296509	0.453156	-0.65432	0.512906	0.83362	Intronless
ERV41	5448.79	-0.159129	0.330134	-0.482013	0.629796	0.889747	Spliced
EMI1	5444.81	0.263553	0.163524	1.61171	0.107025	0.416563	Intronless
MRPL35	5441.86	-0.241656	0.180297	-1.34032	0.180141	0.531863	Intronless
SIM1_2	5432.26	0.043023	0.225868	0.190479	0.848934	0.973719	Unspliced
SRP72	5430.36	0.153431	0.170503	0.899871	0.368189	0.73478	Intronless
ACP1	5425.45	-0.0333395	0.175875	-0.189564	0.849651	0.973719	Intronless
MRPL15	5425.14	0.0379743	0.153023	0.248161	0.80401	0.95904	Intronless
DHH1	5424.16	-0.0558205	0.112593	-0.495772	0.620055	0.885775	Intronless
THG1	5423.59	-0.0175568	0.259576	-0.0676365	0.946075	0.998147	Intronless
COP1	5419.17	-0.0605024	0.164575	-0.367629	0.71315	0.924383	Intronless
CBP6	5414.68	-0.39969	0.352259	-1.13465	0.256523	0.633178	Intronless
YBR062C	5402.82	-0.339975	0.319922	-1.06268	0.287927	0.666835	Spliced
ISA2	5400.58	-0.0422293	0.145145	-0.290946	0.771093	0.94536	Intronless
COX5A	5399.21	-0.0724686	0.172022	-0.421274	0.673555	0.910494	Intronless
YPR137C-B	5394.63	-0.0899488	0.126274	-0.712331	0.47626	0.813665	Intronless
MKT1	5394.49	-0.14176	0.213666	-0.663464	0.507034	0.831333	Intronless
PIR3	5393.25	0.278973	0.122213	2.28268	0.0224494	0.155587	Intronless
IST1	5391.26	-0.137059	0.206844	-0.66262	0.507574	0.831333	Spliced
VPS4	5384.69	-0.349267	0.422016	-0.827616	0.407888	0.76398	Intronless
RBK1	5383.71	-0.238439	0.206602	-1.1541	0.248461	0.623139	Intronless
PMC1	5383.55	-0.362947	0.202297	-1.79413	0.0727919	0.329426	Intronless
ADE5,7	5382.35	-0.345273	0.209484	-1.64821	0.0993105	0.400085	Intronless
COX14	5377.69	-0.152112	0.179458	-0.847617	0.396651	0.755093	Intronless
GGA2	5376.02	-0.519356	0.412667	-1.25854	0.208198	0.574006	Intronless
GDA1	5372.87	-0.173701	0.262506	-0.661703	0.508162	0.831333	Intronless
YPL041C	5370.98	-0.289088	0.433476	-0.666907	0.504832	0.829308	Intronless
ACS2	5362.45	-0.470106	0.318583	-1.47562	0.140047	0.471632	Intronless
YPR158C-D	5360.65	-0.0854294	0.127017	-0.672583	0.501213	0.828885	Intronless
NAB2	5357.92	-0.48176	0.285863	-1.68528	0.0919345	0.381383	Intronless
RPL33B	5357.26	-0.302383	0.554882	-0.54495	0.585788	0.869979	Spliced
AIM9	5356.51	-0.377381	0.152254	-2.47862	0.013189	0.110663	Intronless
YNK1	5355.97	-0.270022	0.170885	-1.58014	0.114075	0.429738	Intronless
RRP14	5354.62	0.338111	0.323343	1.04567	0.295713	0.67291	Intronless
YNL181W	5353.12	-0.0660305	0.172525	-0.382731	0.701919	0.919463	Intronless
AIM6	5351.15	-0.287311	0.199232	-1.44209	0.149276	0.485242	Intronless
SNX3	5350.97	-0.164919	0.321013	-0.513747	0.607429	0.879579	Intronless
TED1	5350.53	-0.326387	0.289376	-1.1279	0.259362	0.63575	Intronless
RPL17B	5347.1	0.157352	0.181807	0.865493	0.386768	0.749392	Spliced
snR76	5346.05	-0.15123	0.182241	-0.829838	0.406631	0.763138	Intronless
VMA7	5345.96	0.0962451	0.142926	0.673392	0.500698	0.828885	Intronless
GRX6	5342.05	0.0853393	0.175702	0.485704	0.627177	0.8895	Intronless
YMR178W	5341.42	-0.192299	0.307305	-0.625758	0.531474	0.842185	Intronless
ABP140	5341.26	-0.0736035	0.174928	-0.420765	0.673927	0.910494	Intronless
DLD3	5338.71	0.144487	0.191139	0.755925	0.449694	0.795097	Intronless
COX16	5337.2	-0.266842	0.344179	-0.775298	0.438163	0.787829	Intronless
YRA2	5332.66	-0.0156646	0.181029	-0.0865308	0.931044	0.996959	Intronless
LSB5	5330.48	-0.264513	0.219361	-1.20583	0.227882	0.598288	Intronless
ADR1	5328.46	-0.380055	0.182234	-2.08553	0.0370212	0.217492	Intronless
YER163C	5326.69	-0.0431023	0.162804	-0.264749	0.791202	0.953825	Intronless
ATG5	5325.08	0.0713652	0.221266	0.322532	0.74705	0.938336	Intronless
SUA7	5321.28	-0.267307	0.444257	-0.601694	0.547378	0.851808	Intronless
POB3	5320.33	-0.18004	0.152954	-1.17708	0.239162	0.612833	Intronless
AIM4	5318.83	-0.197791	0.226649	-0.872674	0.382841	0.747172	Intronless
SGN1	5310.2	-0.0932116	0.148707	-0.626815	0.530781	0.842185	Intronless
TFG2	5309.29	-0.128152	0.211403	-0.606199	0.544382	0.850035	Intronless
LYS20	5308.65	-0.348674	0.319859	-1.09009	0.275675	0.653335	Intronless
ARF2_2	5307.78	-0.112854	0.201175	-0.560973	0.574816	0.866187	Unspliced
SSU1	5305.86	-0.295831	0.239934	-1.23297	0.217587	0.586795	Intronless
URE2	5305.6	-0.345633	0.493837	-0.699894	0.483994	0.820178	Intronless
PET123	5304.39	-0.462748	0.584631	-0.791522	0.428639	0.779827	Intronless
MMF1	5303.72	0.415985	0.612324	0.679355	0.496913	0.827429	Intronless
BET4	5302.41	-0.11466	0.182216	-0.629252	0.529184	0.842116	Spliced
MRPL32	5295.38	-0.312547	0.328179	-0.952368	0.340911	0.711949	Intronless
YIR024C	5295.27	-0.0120975	0.197369	-0.0612942	0.951125	0.998147	Intronless
YKR011C	5294.22	-0.325786	0.32594	-0.999528	0.317539	0.695701	Intronless
YDR262W	5294.17	-0.324921	0.161133	-2.01647	0.0437506	0.238348	Intronless
YIL089W	5291.3	-0.15957	0.426126	-0.374467	0.708057	0.922401	Intronless
NOP12	5289.71	0.271785	0.187661	1.44828	0.14754	0.482266	Intronless
APA2	5284.99	-0.247077	0.163646	-1.50983	0.131087	0.45524	Intronless
OCA2	5284.98	-0.103339	0.252575	-0.40914	0.682437	0.914589	Intronless
SPE2	5282.51	-0.0562979	0.232898	-0.241728	0.808991	0.959299	Intronless
RDL1	5282.14	0.019144	0.133792	0.143088	0.88622	0.986469	Intronless
PDE1	5279.39	-0.264782	0.224303	-1.18046	0.237816	0.61111	Intronless
NAM9	5277.8	-0.133517	0.206545	-0.646429	0.518002	0.835849	Intronless
SNF11	5277.42	-0.185256	0.329943	-0.56148	0.574471	0.866038	Intronless
FBA1	5276.92	-0.220355	0.208232	-1.05822	0.289955	0.668646	Intronless
ARP4	5275.65	-0.0892444	0.136522	-0.653699	0.513306	0.83362	Intronless
YLR257W	5273.7	-0.273145	0.302682	-0.902415	0.366836	0.733353	Intronless
RIB1	5268.64	-0.156723	0.265407	-0.5905	0.554856	0.855057	Intronless
TRS23	5265	-0.458232	0.391427	-1.17067	0.241731	0.615892	Intronless
SMB1	5264.99	-0.0644258	0.238659	-0.269949	0.787199	0.951676	Intronless
YHR020W	5264.2	-0.444061	0.605686	-0.733153	0.463465	0.804403	Intronless
RAD6	5262.22	-0.166705	0.356561	-0.467536	0.640116	0.89395	Intronless
SPC2	5259.01	0.115171	0.261608	0.440245	0.65976	0.903208	Intronless
DBP9	5257.87	0.101059	0.248607	0.406502	0.684374	0.915584	Intronless
TOM7	5257.51	0.166996	0.195409	0.854597	0.392774	0.751735	Intronless
ATP5	5254.44	-0.206579	0.179368	-1.15171	0.249441	0.62401	Intronless
SAC1	5253.85	-0.47451	0.504345	-0.940844	0.346785	0.717174	Intronless
MRI1	5251.29	0.00639242	0.259635	0.0246208	0.980357	0.998147	Intronless
NAN1	5251.21	0.20626	0.191071	1.0795	0.280367	0.65839	Intronless
SQT1	5250.41	0.102538	0.20437	0.501727	0.61586	0.883074	Intronless
AMN1	5248.03	-0.405805	0.27112	-1.49677	0.134452	0.462271	Intronless
LAP2	5247.9	-0.510594	0.253683	-2.01273	0.0441433	0.239918	Intronless
CAF16	5245.88	0.134719	0.21168	0.636426	0.524499	0.839565	Intronless
YOR356W	5245.7	-0.429639	0.307518	-1.39712	0.162378	0.505164	Intronless
KTR3	5245.09	-0.304694	0.196379	-1.55156	0.120768	0.439273	Intronless
SNN1	5244.56	0.356301	0.139142	2.56071	0.0104459	0.0944045	Intronless
GCV1	5243.23	-0.328776	0.41329	-0.795508	0.426318	0.779098	Intronless
PAF1	5241.21	-0.288704	0.182787	-1.57945	0.114232	0.429738	Intronless
YEL047C	5239.62	-0.0756707	0.239099	-0.316483	0.751636	0.939443	Intronless
GET2	5237.22	-0.173807	0.368227	-0.472011	0.636919	0.893313	Intronless
DSD1	5235.46	-0.455565	0.272468	-1.67199	0.0945259	0.387832	Intronless
YCK2	5232.5	-0.1509	0.205721	-0.733517	0.463243	0.804403	Intronless
YJL213W	5232.27	-0.368832	0.23419	-1.57492	0.115274	0.431388	Intronless
PHO88	5230.44	0.253864	0.134379	1.88917	0.0588694	0.292303	Intronless
STE4	5228.15	-0.422648	0.40401	-1.04613	0.2955	0.672851	Intronless
TVP38	5227.24	-0.194813	0.201187	-0.968317	0.332886	0.706516	Intronless
PST2	5222.62	-0.0714101	0.183357	-0.389458	0.696937	0.91772	Intronless
SSD1	5221	-0.369088	0.158771	-2.32465	0.0200904	0.14555	Intronless
MTC3	5220.8	0.0625593	0.12502	0.500393	0.616799	0.883502	Intronless
APS2	5219.44	-0.349215	0.470386	-0.742401	0.457845	0.800752	Intronless
MZM1	5218.61	-0.318075	0.49897	-0.637463	0.523823	0.839483	Intronless
FMC1	5218.4	-0.443045	0.400336	-1.10668	0.268431	0.646654	Intronless
RGI2	5217.96	0.114937	0.368073	0.312268	0.754837	0.93945	Intronless
DOA1	5217.96	-0.145413	0.137739	-1.05571	0.2911	0.66877	Intronless
RML2	5214.22	-0.277097	0.136747	-2.02635	0.0427294	0.235575	Intronless
RPL26A	5213.72	-0.350036	0.479963	-0.729297	0.46582	0.80472	Spliced
NCP1	5213.51	-0.208767	0.348492	-0.599059	0.549134	0.852586	Intronless
YGL204C	5213.16	0.152458	0.151997	1.00304	0.315843	0.693308	Intronless
ILM1	5207.23	-0.290726	0.415986	-0.698886	0.484624	0.820178	Intronless
TIF1	5204.71	-0.07414	0.233625	-0.317346	0.750981	0.939443	Intronless
AIM2	5203.75	-0.596213	0.757748	-0.786823	0.431385	0.781936	Intronless
SRP101	5203.48	-0.0705756	0.15052	-0.468879	0.639156	0.893627	Intronless
DB641776_2	5200.03	-0.42945	0.12882	-3.33371	0.000856946	0.0139067	Unspliced
CMD1	5199.21	0.110916	0.178568	0.621141	0.534507	0.843978	Intronless
TRM112	5197.21	-0.597019	0.411722	-1.45006	0.147043	0.481595	Intronless
HAL5	5197.2	-0.189534	0.17892	-1.05933	0.289452	0.668419	Intronless
RRP15	5193.16	0.0138482	0.372136	0.0372129	0.970315	0.998147	Intronless
MTR2_5	5192.88	0.113511	0.17345	0.654433	0.512833	0.83362	Unspliced
GAS1	5191.41	-0.199857	0.220331	-0.907075	0.364367	0.732025	Intronless
YKR070W	5190.93	-0.149101	0.200864	-0.742296	0.457908	0.800752	Intronless
ECM19	5189.7	-0.539923	0.543303	-0.993779	0.320331	0.696947	Intronless
ALO1	5188.59	-0.475497	0.287488	-1.65397	0.0981326	0.398088	Intronless
RIM1	5188.47	-0.0118976	0.187726	-0.0633775	0.949466	0.998147	Spliced
GRX2	5185.87	-0.0871906	0.197015	-0.442559	0.658084	0.902527	Intronless
YOL092W	5184.89	-0.182913	0.424655	-0.430732	0.666663	0.906512	Intronless
RRP8	5183.65	-0.0123252	0.360362	-0.0342023	0.972716	0.998147	Intronless
KTR6	5181.95	-0.136427	0.202397	-0.674058	0.500274	0.828885	Intronless
LTV1	5180.31	0.139432	0.207337	0.672488	0.501273	0.828885	Intronless
RDS3	5178.5	0.340754	0.150801	2.25962	0.0238446	0.162506	Intronless
MXR2	5177.74	-0.333604	0.478565	-0.697092	0.485745	0.820721	Intronless
DPL1	5172.24	-0.452635	0.18321	-2.47057	0.0134897	0.112637	Intronless
SSL1	5171.99	0.442262	0.132709	3.33257	0.000860483	0.0139313	Intronless
RLI1	5171.87	-0.154875	0.451822	-0.342779	0.731765	0.932951	Intronless
GCS1	5170.67	-0.256458	0.308186	-0.832152	0.405323	0.763032	Intronless
GCD6	5170.52	0.0301265	0.15126	0.19917	0.84213	0.970941	Intronless
LYS21	5170.35	-0.162281	0.244641	-0.663343	0.507111	0.831333	Intronless
MVB12	5169.64	-0.346264	0.562058	-0.616064	0.537852	0.845967	Intronless
MSI1	5169.35	-0.227393	0.452175	-0.502887	0.615044	0.882821	Intronless
MRPL17	5169.15	-0.580591	0.513721	-1.13017	0.258405	0.634242	Intronless
ERP6	5164.75	-0.409286	0.265663	-1.54062	0.123409	0.444004	Intronless
YOR390W	5164.12	0.0390885	0.217026	0.18011	0.857066	0.974639	Intronless
QRI1	5162.3	-0.0388316	0.160054	-0.242616	0.808303	0.959299	Intronless
RPS30A	5160.89	0.0931352	0.175417	0.530937	0.595463	0.873996	Spliced
ENT5	5160.39	0.177665	0.183868	0.966266	0.333911	0.706516	Intronless
CSL4	5160.18	0.184272	0.174719	1.05467	0.291575	0.66877	Intronless
INO4	5157.18	-0.548654	0.454479	-1.20721	0.22735	0.5978	Intronless
EGT2	5156.34	-0.0374376	0.245666	-0.152393	0.878877	0.983196	Intronless
HNM1	5153.85	0.0424365	0.218719	0.194023	0.846158	0.973419	Intronless
MED2	5153.67	-0.0335605	0.126841	-0.264587	0.791328	0.953825	Intronless
APC11	5152.26	0.00441719	0.220345	0.0200467	0.984006	0.998147	Intronless
TAF13	5151.53	0.06656	0.15304	0.43492	0.66362	0.905976	Intronless
CPR4	5148.09	-0.543257	0.290754	-1.86845	0.0617001	0.300314	Intronless
CMS1	5139.3	0.359432	0.175287	2.05053	0.0403124	0.228084	Intronless
RRP43	5138.58	0.307248	0.173367	1.77224	0.076355	0.339755	Intronless
PRS2	5137.4	-0.209492	0.211645	-0.989823	0.322261	0.699326	Intronless
YJL171C	5136.34	-0.594848	0.731027	-0.813715	0.415808	0.77145	Intronless
BDS1	5135.99	-0.0536123	0.162057	-0.330825	0.740777	0.93574	Intronless
ADH5	5134.39	-0.0908253	0.255831	-0.355021	0.722574	0.927993	Intronless
MNN5	5131.44	-0.214786	0.244836	-0.877263	0.380344	0.74566	Intronless
TFA2	5131.23	-0.417415	0.41522	-1.00529	0.314758	0.692006	Intronless
SFH5	5130.28	-0.179821	0.447348	-0.401971	0.687705	0.915584	Intronless
MPD2	5129.28	0.0964059	0.218185	0.441855	0.658594	0.902867	Intronless
YIF1	5126.65	-0.0970116	0.29519	-0.328642	0.742427	0.936314	Intronless
MPP10	5124.55	-0.23772	0.234575	-1.01341	0.310865	0.688074	Intronless
ATP14	5123.21	-0.184013	0.316263	-0.581836	0.560677	0.858239	Intronless
BNA5	5122.91	-0.412344	0.169161	-2.43758	0.014786	0.11797	Intronless
MAS2	5120.69	-0.421797	0.208284	-2.02511	0.0428563	0.236055	Intronless
LYS9	5120.24	-0.32255	0.193829	-1.6641	0.0960929	0.392092	Intronless
RTS1	5116.44	-0.407689	0.21282	-1.91565	0.0554097	0.281414	Intronless
COX6	5113.95	-0.343793	0.41541	-0.827601	0.407897	0.76398	Intronless
SER33	5113.19	-0.0289122	0.231171	-0.125069	0.900469	0.989601	Intronless
NHP10	5108.2	-0.284691	0.483344	-0.589002	0.55586	0.855057	Intronless
SRM1	5105.99	-0.315472	0.262704	-1.20086	0.229804	0.600375	Intronless
AIM18	5104.67	-0.436865	0.291604	-1.49815	0.134095	0.461966	Intronless
GTR1	5102.79	0.336298	0.131316	2.56099	0.0104375	0.0944045	Intronless
snR51	5102.57	0.0441263	0.231833	0.190337	0.849045	0.973719	Intronless
MSS116	5100.56	-0.1187	0.246373	-0.481788	0.629956	0.889747	Intronless
YPL260W	5099.2	-0.355487	0.22338	-1.5914	0.11152	0.425679	Intronless
DDI1	5097.55	-0.457213	0.246311	-1.85624	0.0634195	0.305024	Intronless
SDH2	5095.7	0.0360593	0.201636	0.178834	0.858068	0.974975	Intronless
BIT2	5093.72	-0.146595	0.316538	-0.463121	0.643278	0.894674	Intronless
DIB1	5092.14	0.0689465	0.241125	0.285937	0.774926	0.945916	Intronless
PSE1	5090.19	0.160436	0.139506	1.15003	0.250132	0.625058	Intronless
YIL014C-A	5089.85	-0.450855	0.502981	-0.896365	0.370058	0.735912	Intronless
YGR210C	5089.77	-0.0519494	0.379678	-0.136825	0.891169	0.988058	Intronless
YVH1	5089.61	0.0305295	0.270994	0.112658	0.910302	0.990308	Intronless
BET3	5089.6	-0.375171	0.617078	-0.607979	0.543201	0.84896	Intronless
GLN4	5089.59	0.339368	0.767528	0.442158	0.658375	0.902746	Intronless
CSE2	5085.72	-0.137533	0.33911	-0.40557	0.685059	0.915584	Intronless
IMP1	5085.25	-0.0304214	0.119109	-0.255408	0.798408	0.957007	Intronless
RRP40	5084.71	0.30946	0.131488	2.35353	0.018596	0.138656	Intronless
ATP4	5083.88	-0.487074	0.42543	-1.1449	0.252251	0.627397	Intronless
YGR201C	5083.28	-0.195931	0.218296	-0.897545	0.369428	0.73561	Intronless
snR31	5080.92	-0.658159	0.45925	-1.43312	0.151824	0.487945	Intronless
ELP6	5080.58	-0.0553763	0.346044	-0.160027	0.87286	0.980347	Intronless
YAR053W	5079.65	-0.09893	0.273145	-0.362189	0.717211	0.926851	Intronless
BUD32	5079.32	0.217852	0.177033	1.23057	0.218482	0.587474	Intronless
YKL066W	5072.6	-0.285598	0.199202	-1.43371	0.151654	0.487913	Intronless
MRPS5	5072.59	-0.0358529	0.184932	-0.19387	0.846278	0.973419	Intronless
ESF1	5069.34	0.501228	0.735916	0.681093	0.495813	0.827429	Intronless
ETT1	5069.26	-0.318725	0.4828	-0.660159	0.509152	0.831867	Intronless
HIP1	5065.91	-0.0742018	0.210166	-0.353064	0.724041	0.928544	Intronless
ATG27	5064.55	-0.473933	0.711325	-0.666268	0.50524	0.829676	Intronless
JIP5	5063.66	-0.160207	0.569889	-0.281119	0.778619	0.947354	Intronless
YPK2	5063.24	-0.649205	0.400575	-1.62068	0.105086	0.411901	Intronless
MNN9	5061.64	-0.271276	0.462031	-0.587137	0.557111	0.855768	Intronless
PRD1	5057.09	-0.554055	0.453579	-1.22152	0.22189	0.592022	Intronless
IRC11	5056.88	0.49597	0.211213	2.3482	0.0188645	0.139601	Intronless
TAM41	5056.34	-0.0676094	0.152522	-0.443276	0.657566	0.90221	Intronless
YEF3	5055.19	-0.446475	0.451476	-0.988923	0.322701	0.699326	Intronless
TVP23	5054.6	0.478091	0.716864	0.66692	0.504823	0.829308	Intronless
TMA10	5054.3	-0.586783	0.438302	-1.33876	0.180648	0.532676	Intronless
TRM82	5051.35	0.250091	0.181421	1.37852	0.168044	0.51534	Intronless
RPB3	5051.27	-0.329862	0.437316	-0.754287	0.450677	0.795375	Intronless
RAS1	5049.23	-0.549231	0.594654	-0.923614	0.355687	0.724334	Intronless
SFA1	5045.51	-0.64962	0.672622	-0.965803	0.334143	0.706516	Intronless
CTS1	5041.78	-0.369771	0.431157	-0.857624	0.3911	0.750742	Intronless
ERV15	5041.34	0.0723699	0.322119	0.224669	0.822237	0.96314	Intronless
UTP23	5040.78	0.142367	0.159535	0.892385	0.372186	0.738271	Intronless
LAG1	5038.39	-0.437951	0.423114	-1.03507	0.300638	0.678724	Intronless
IZH2	5037.32	-0.156043	0.275952	-0.565471	0.571754	0.864398	Intronless
SYC1	5036.49	0.331006	0.159828	2.07102	0.0383571	0.22138	Intronless
SOL1	5034.44	0.146444	0.210558	0.695505	0.486739	0.821194	Intronless
SDA1	5033.1	-0.058872	0.281613	-0.209053	0.834407	0.967845	Intronless
IST2	5030.9	-0.433035	0.512518	-0.844918	0.398157	0.75726	Intronless
MRPS35	5030.36	-0.354287	0.28125	-1.25969	0.207783	0.574006	Intronless
NAB6	5029.83	-0.329933	0.175477	-1.88021	0.0600799	0.295653	Intronless
YGR102C	5029.51	-0.171874	0.295548	-0.581544	0.560874	0.858239	Intronless
YPT32	5028.93	0.272149	0.227127	1.19823	0.230829	0.602356	Intronless
SPG5	5027.08	0.278942	0.666384	0.418591	0.675515	0.911747	Intronless
PNP1	5024.55	-0.0664637	0.247904	-0.268102	0.788621	0.952393	Intronless
ELC1	5024.15	0.0858353	0.244279	0.351382	0.725301	0.928952	Intronless
HRT1	5024.02	0.0981186	0.194491	0.50449	0.613917	0.882122	Intronless
ELP2	5023.17	0.105361	0.18706	0.563248	0.573266	0.865074	Intronless
GYP6	5022.2	-0.00882685	0.156019	-0.0565757	0.954883	0.998147	Intronless
YPK1	5021.56	-0.584536	0.488033	-1.19774	0.231019	0.602584	Intronless
PCS60	5020.69	-0.709747	0.49759	-1.42637	0.153762	0.490464	Intronless
PBN1	5020.01	-0.701532	0.529936	-1.3238	0.185568	0.539146	Intronless
EHD3	5018.96	-0.252236	0.322052	-0.783216	0.4335	0.784532	Intronless
PPH22	5018.44	-0.195305	0.179613	-1.08737	0.276874	0.654197	Intronless
IMG2	5018.25	0.334752	0.676	0.495196	0.620462	0.885987	Intronless
HOC1	5018.11	-0.286277	0.286917	-0.997772	0.31839	0.695797	Intronless
RPS20	5017.74	-0.159715	0.291906	-0.547145	0.584279	0.869696	Intronless
DAP2	5016.92	-0.337032	0.165025	-2.04231	0.0411207	0.230016	Intronless
YER071C	5015.02	-0.414712	0.597836	-0.693689	0.487877	0.821922	Intronless
OST3	5012.11	-0.178023	0.185546	-0.959456	0.337329	0.70984	Intronless
PAN6	5011.86	0.0990562	0.244346	0.405393	0.685188	0.915584	Intronless
IRC9	5011.86	-0.30451	0.20514	-1.4844	0.137702	0.467157	Intronless
RPC31	5009.09	-0.265887	0.316128	-0.841074	0.400306	0.758066	Intronless
DAD1	5002.94	0.390752	0.749415	0.521409	0.602082	0.876182	Intronless
DFG5	5002.11	-0.383299	0.273458	-1.40167	0.161013	0.503403	Intronless
CTR2	5000.83	-0.525616	0.540069	-0.973237	0.330435	0.706516	Intronless
YIL046W-A	4997.69	-0.46815	0.493549	-0.94854	0.342855	0.713091	Intronless
COQ1	4996.54	-0.281081	0.256065	-1.09769	0.272339	0.650162	Intronless
PTC1	4996.01	-0.092174	0.17584	-0.524192	0.600145	0.8756	Intronless
YDR524C-A	4995.82	0.385769	0.352133	1.09552	0.273288	0.651302	Intronless
MDY2	4991.97	0.237337	0.592471	0.400589	0.688723	0.915584	Intronless
NNT1	4991.15	-0.253082	0.404868	-0.625099	0.531906	0.842185	Intronless
MSA2	4990.83	-0.21658	0.28358	-0.763735	0.445025	0.79134	Intronless
CUP2	4990.78	-0.0374121	0.219685	-0.170299	0.864775	0.978083	Intronless
ZIM17	4990.75	0.168474	0.193271	0.871697	0.383374	0.747172	Intronless
MAK11	4990.55	0.148982	0.187279	0.795508	0.426318	0.779098	Intronless
snR4	4990.32	-0.121824	0.510206	-0.238773	0.811281	0.959761	Intronless
RRG7	4990.29	0.417623	0.141858	2.94395	0.00324054	0.0398396	Intronless
RTG2	4990.13	-0.216386	0.15981	-1.35402	0.175729	0.527621	Intronless
RAM2	4988.48	-0.44485	0.449923	-0.988724	0.322798	0.699326	Intronless
RPL39	4988.39	0.145421	0.128587	1.13091	0.258092	0.634021	Spliced
APM1	4988.37	-0.0744669	0.192822	-0.386194	0.699353	0.918749	Intronless
AOS1	4987.07	0.176426	0.185813	0.949481	0.342376	0.712543	Intronless
YBR056W-A	4986.75	0.292237	0.225706	1.29477	0.1954	0.554825	Intronless
CDC33	4986.58	0.18389	0.179148	1.02647	0.304671	0.683261	Intronless
SKI6	4984.9	-0.669607	0.664426	-1.0078	0.313551	0.690915	Intronless
ATP20	4983.83	-0.019223	0.158723	-0.121111	0.903603	0.989601	Intronless
ADE3	4982.31	-0.283241	0.264096	-1.07249	0.283498	0.662359	Intronless
YCL057C-A	4982.18	-0.355303	0.440948	-0.805771	0.420375	0.774366	Intronless
RPS31	4982.09	0.119783	0.187506	0.638821	0.522939	0.839483	Intronless
MRPL7	4981.97	0.304051	0.672603	0.452051	0.651232	0.899389	Intronless
YGR073C	4981.49	0.114135	0.220783	0.516957	0.605186	0.878189	Intronless
SPT16	4980.54	-0.148442	0.173484	-0.855653	0.39219	0.751403	Intronless
FCY21	4980.17	-0.59292	0.489569	-1.21111	0.225855	0.596372	Intronless
RPS0B	4979.86	-0.627458	0.737257	-0.851072	0.394729	0.754141	Spliced
YFR018C	4978.59	0.149421	0.226381	0.660041	0.509227	0.831867	Intronless
RPL13A	4978.07	-0.00693405	0.194277	-0.0356915	0.971528	0.998147	Spliced
MEH1	4976.11	-0.0814596	0.200349	-0.406587	0.684311	0.915584	Intronless
RIO1	4975.11	0.30945	0.159809	1.93637	0.0528224	0.27384	Intronless
TOM71	4973.09	-0.105944	0.268466	-0.394628	0.693118	0.916163	Intronless
REH1	4971.9	-0.514675	0.524896	-0.980528	0.326826	0.703423	Intronless
MRPL3	4971.33	-0.283647	0.204937	-1.38407	0.166337	0.512382	Intronless
DOC1	4969.85	-0.429117	0.359832	-1.19255	0.233047	0.605104	Intronless
snR84	4968.16	0.0578819	0.371927	0.155627	0.876327	0.98197	Intronless
YMR252C	4967.72	-0.140139	0.1361	-1.02968	0.303162	0.681745	Intronless
SLH1	4967.62	-0.555825	0.801939	-0.693101	0.488246	0.822172	Intronless
RRP45	4967.46	-0.0618684	0.438186	-0.141192	0.887718	0.986524	Intronless
DLD2	4966.84	-0.453164	0.416601	-1.08776	0.276699	0.654008	Intronless
YBR126W-A	4965.06	-0.0821881	0.256819	-0.320023	0.748951	0.938973	Intronless
YKL069W	4964.52	0.0108404	0.207767	0.0521759	0.958389	0.998147	Intronless
PMT1	4962.02	-0.409985	0.318639	-1.28667	0.198208	0.559345	Intronless
ERG26	4962.02	0.308445	0.71792	0.429637	0.66746	0.906512	Intronless
ECT1	4961.96	-0.214135	0.238742	-0.896933	0.369755	0.735776	Intronless
MNN10	4961.79	-0.164691	0.315103	-0.522657	0.601213	0.875917	Intronless
SPT2	4961.23	-0.126236	0.172846	-0.730334	0.465186	0.804719	Intronless
CRG1	4960.06	-0.41376	0.442496	-0.935059	0.349758	0.719127	Intronless
CWC15	4959.77	0.268136	0.156602	1.71222	0.0868566	0.368976	Intronless
CPT1	4956.32	-0.114618	0.198987	-0.576006	0.564611	0.859748	Spliced
CDC11	4955.52	-0.389807	0.453495	-0.859563	0.39003	0.750568	Intronless
YLR122C	4954.9	-0.01256	0.19488	-0.0644501	0.948612	0.998147	Intronless
ERG24	4953.72	-0.0831953	0.231558	-0.359284	0.719382	0.927225	Intronless
UBX7	4953.33	-0.220928	0.185891	-1.18848	0.234645	0.607031	Intronless
DOS2	4953	-0.14716	0.224635	-0.655109	0.512397	0.833567	Intronless
YMR057C	4952.75	-0.311357	0.516357	-0.602989	0.546516	0.850863	Intronless
ORM2	4952.5	-0.207182	0.288338	-0.718538	0.472426	0.811192	Intronless
MRPL11	4950.12	-0.440607	0.396314	-1.11176	0.26624	0.644783	Intronless
IML1	4949.29	-0.549285	0.660722	-0.831341	0.405781	0.763032	Intronless
FMP32	4948.27	0.332306	0.148736	2.2342	0.0254698	0.169889	Intronless
GRX4	4947.55	-0.638154	0.693276	-0.920491	0.357316	0.72562	Intronless
NAT1	4946.8	-0.654556	0.526908	-1.24226	0.214141	0.581927	Intronless
YJR124C	4945.15	-0.575269	0.410104	-1.40274	0.160695	0.502636	Intronless
POP8	4942.1	0.522396	0.12755	4.09562	4.21035e-05	0.00113185	Spliced
GOT1	4940.07	-0.0478743	0.460737	-0.103908	0.917242	0.992367	Spliced
RPB2	4940.04	-0.0571546	0.184721	-0.309411	0.757009	0.939611	Intronless
PEX3	4938.55	-0.513217	0.47773	-1.07428	0.282697	0.661467	Intronless
YCR090C	4937.53	-0.429674	0.598467	-0.717957	0.472784	0.811192	Intronless
MRP8	4937.31	-0.00397181	0.223289	-0.0177877	0.985808	0.998147	Intronless
MIR1	4935.21	-0.321216	0.414024	-0.775838	0.437845	0.787829	Intronless
HIS2	4935.15	0.0650926	0.222517	0.292528	0.769883	0.944817	Intronless
NUP57	4934.44	0.00378305	0.214761	0.0176152	0.985946	0.998147	Intronless
YPT1	4933.06	0.0693356	0.133005	0.5213	0.602158	0.876182	Intronless
NSA1	4932.49	-0.472273	0.526006	-0.897846	0.369268	0.73561	Intronless
VPS29	4930.36	-0.384127	0.460339	-0.834442	0.404032	0.761406	Spliced
snR42	4929.9	-0.368637	0.469057	-0.785912	0.431919	0.782492	Intronless
MNN2	4929.03	-0.222103	0.247182	-0.898541	0.368897	0.735342	Intronless
UTP7	4927.98	0.196623	0.197722	0.994445	0.320006	0.69676	Intronless
NOC2	4927.34	-0.202287	0.505867	-0.399882	0.689244	0.915584	Intronless
MAF1	4926.17	0.15568	0.190784	0.816004	0.414498	0.770979	Spliced
BAS1	4923.26	-0.27868	0.343833	-0.810509	0.417648	0.773297	Intronless
LEU9	4922.95	-0.200092	0.23691	-0.844593	0.398338	0.75726	Intronless
RMT2	4922.21	-0.308743	0.488196	-0.632416	0.527115	0.840426	Intronless
ALR2	4922.03	-0.493447	0.765872	-0.644294	0.519384	0.836766	Intronless
ECM4	4921.51	-0.252633	0.238719	-1.05828	0.289926	0.668646	Intronless
UBC4	4920.5	-0.805681	0.594365	-1.35553	0.175248	0.52643	Spliced
ECM1	4918.8	0.672559	0.263787	2.54963	0.0107836	0.095967	Intronless
EFB1_2	4918.35	-0.582482	0.555953	-1.04772	0.294768	0.671627	Unspliced
ADD66	4917.88	0.0581903	0.164427	0.353898	0.723415	0.928323	Intronless
CBP3	4917.41	-0.669129	0.52521	-1.27402	0.202656	0.566335	Intronless
RRP1	4917.3	-0.0761081	0.439538	-0.173155	0.86253	0.977789	Intronless
LCL2	4916.95	-0.16259	0.543734	-0.299024	0.764922	0.94234	Intronless
YNL190W	4916.01	-0.636293	0.468025	-1.35953	0.173979	0.524537	Intronless
SLM1	4915.9	-0.201249	0.268041	-0.750813	0.452765	0.797202	Intronless
STP3	4915.45	-0.613352	0.422772	-1.45079	0.146839	0.481595	Intronless
TYW1	4914.84	-0.479433	0.553968	-0.865454	0.38679	0.749392	Intronless
SVP26	4914.15	0.201798	0.1265	1.59524	0.110659	0.424007	Intronless
RSM25	4911.97	-0.375321	0.252614	-1.48575	0.137346	0.466867	Intronless
YDR381C-A	4909.93	-0.365787	0.276609	-1.3224	0.186035	0.539259	Spliced
YPT6	4907.58	-0.186387	0.516279	-0.36102	0.718084	0.927056	Intronless
snR36	4905.67	-0.215773	0.485636	-0.444311	0.656818	0.90221	Intronless
TLG1	4904.97	-0.476503	0.701057	-0.679692	0.4967	0.827429	Intronless
YCL012C	4903.84	0.121147	0.229017	0.528987	0.596815	0.875047	Spliced
HPA3	4900.95	-0.194989	0.497876	-0.39164	0.695324	0.917549	Intronless
TIF2	4900.86	-0.208159	0.409287	-0.50859	0.61104	0.880816	Intronless
POP3	4900.73	0.282287	0.593932	0.475285	0.634584	0.89248	Intronless
YHR009C	4898.33	-0.468226	0.253905	-1.84409	0.0651693	0.310543	Intronless
HSE1	4897.11	-0.141695	0.229304	-0.617936	0.536617	0.845417	Intronless
ERD1	4896.94	-0.487678	0.437021	-1.11592	0.264458	0.643027	Intronless
COG7	4896.79	-0.139457	0.196122	-0.71107	0.477041	0.814394	Intronless
CWC2	4895.67	-0.373147	0.329731	-1.13167	0.257773	0.633936	Intronless
DOM34	4895.33	0.221531	0.180015	1.23063	0.218462	0.587474	Intronless
RBG1	4894.9	-0.56356	0.613714	-0.918278	0.358473	0.727174	Intronless
TOR2	4894.86	-0.601607	0.681516	-0.882748	0.377372	0.74279	Intronless
PGC1	4894.38	0.399173	0.71965	0.554677	0.579116	0.868579	Intronless
SAR1	4894.13	0.0214768	0.155452	0.138156	0.890117	0.987422	Spliced
RPA43	4892.99	0.444882	0.240921	1.84659	0.0648065	0.309751	Intronless
HSP82	4892.94	0.260413	0.230022	1.13212	0.257584	0.633936	Intronless
YNL208W	4892.89	-0.574136	0.488542	-1.1752	0.239913	0.613601	Intronless
SEC61	4891.66	-0.757798	0.515666	-1.46955	0.141683	0.474134	Intronless
YHR122W	4891.12	0.0292279	0.189994	0.153836	0.877739	0.982595	Intronless
snR70	4891.04	-0.397419	0.542614	-0.732416	0.463915	0.804403	Intronless
HEM12	4890.57	0.376849	0.572499	0.658253	0.510376	0.832559	Intronless
ENT2	4890.17	-0.645217	0.190428	-3.38825	0.000703406	0.0118907	Intronless
YLL056C	4890.03	-0.683454	0.626583	-1.09076	0.275377	0.653335	Intronless
BET1	4889.9	0.0171084	0.288794	0.059241	0.95276	0.998147	Spliced
TPM1	4889.49	-0.314432	0.548349	-0.573415	0.566364	0.860778	Intronless
YTM1	4888.47	-0.043401	0.33556	-0.129339	0.897089	0.989436	Intronless
YML6	4888.07	-0.392098	0.258244	-1.51833	0.128932	0.452313	Spliced
BRE5	4886.24	0.442945	0.754184	0.587317	0.556991	0.855768	Intronless
YDR286C	4883.87	-0.0282204	0.199578	-0.1414	0.887554	0.986524	Intronless
SCP1	4882.08	-0.072425	0.296772	-0.244043	0.807198	0.959131	Intronless
BCH1	4881.41	-0.353222	0.151681	-2.32872	0.0198741	0.144286	Intronless
CRN1	4877.49	-0.71128	0.456213	-1.5591	0.118973	0.436595	Intronless
YOL075C	4876.34	-0.633007	0.635424	-0.996197	0.319155	0.69676	Intronless
YJL127C-B	4876.19	0.172203	0.177537	0.969958	0.332068	0.706516	Intronless
ARG7	4876.08	-0.187954	0.164976	-1.13928	0.254586	0.630581	Intronless
YPR002C-A	4875.32	0.30114	0.21067	1.42944	0.152878	0.489372	Intronless
UTH1	4872.65	0.0338337	0.399698	0.0846481	0.932541	0.99737	Intronless
YER134C	4872.49	-0.728932	0.668633	-1.09018	0.275633	0.653335	Intronless
SBH2	4872.05	-0.14706	0.49536	-0.296874	0.766563	0.942757	Intronless
LSB3	4871.39	0.25353	0.663155	0.382309	0.702232	0.919555	Spliced
PEX19	4867.52	-0.17381	0.238363	-0.729182	0.46589	0.80472	Intronless
ARF1	4867.27	-0.414148	0.598422	-0.692067	0.488895	0.822617	Intronless
PAU17	4867.16	0.457439	0.774789	0.590404	0.55492	0.855057	Intronless
MAK3	4867.09	0.444198	0.133244	3.33372	0.000856941	0.0139067	Intronless
MID2	4866.95	-0.829504	0.659724	-1.25735	0.208627	0.574444	Intronless
MRPS28	4865.68	-0.560609	0.534236	-1.04937	0.29401	0.671008	Intronless
FLC1	4865.39	0.146893	0.234941	0.625233	0.531818	0.842185	Intronless
IZH1	4864.17	0.30995	0.257026	1.20591	0.227854	0.598288	Intronless
OXA1	4864.11	-0.147745	0.458034	-0.322564	0.747026	0.938336	Intronless
NDL1	4860.92	0.117199	0.25515	0.459335	0.645994	0.89611	Intronless
RPS9A	4860.46	0.0734054	0.327287	0.224284	0.822536	0.963327	Spliced
MDE1	4860.18	-0.0940487	0.448039	-0.209912	0.833737	0.967409	Intronless
YBR141C	4859.97	0.0141856	0.342654	0.0413994	0.966978	0.998147	Intronless
YNL305C	4859.16	-0.699403	0.463022	-1.51052	0.130912	0.45524	Intronless
RNH203	4858.73	0.0598079	0.196151	0.304908	0.760436	0.94062	Intronless
VCX1	4856.52	-0.2942	0.242135	-1.21502	0.224358	0.594467	Intronless
HIR3	4856.42	-0.461698	0.740452	-0.623536	0.532932	0.842842	Intronless
MSO1	4855.08	-0.164527	0.180401	-0.912008	0.361765	0.729132	Intronless
APE2	4853.92	-0.303827	0.17923	-1.69518	0.0900413	0.376373	Spliced
YDR319C	4852.93	0.0369087	0.323094	0.114235	0.909051	0.990104	Intronless
GPI19	4852.65	-0.714423	0.667179	-1.07081	0.284254	0.663066	Intronless
AAD3	4852.52	-0.692834	0.513302	-1.34976	0.177093	0.528784	Intronless
ALE1	4852.5	-0.214733	0.178226	-1.20484	0.228266	0.599067	Intronless
PAM18	4851.22	-0.844956	0.56686	-1.49059	0.136069	0.46528	Intronless
APE3	4850.41	-0.208005	0.211653	-0.982766	0.325723	0.702155	Intronless
YNL203C	4845.3	-0.442994	0.254831	-1.73838	0.0821432	0.355909	Intronless
OLE1	4845.01	0.00473023	0.343849	0.0137567	0.989024	0.998147	Intronless
HAP3	4844.36	0.247184	0.187146	1.32081	0.186566	0.539852	Intronless
FSH3	4841.36	-0.0283281	0.221091	-0.128129	0.898047	0.989601	Intronless
DST1	4838.23	0.111283	0.197923	0.562257	0.573941	0.865618	Intronless
SMT3	4836.11	0.106106	0.174828	0.606916	0.543906	0.849677	Intronless
YIL102C-A	4833.54	-0.321812	0.700278	-0.459549	0.64584	0.89611	Intronless
IMD4_2	4832.56	0.185389	0.415118	0.446595	0.655168	0.90212	Unspliced
DLS1	4832.27	0.296189	0.206046	1.43749	0.150579	0.486625	Intronless
CPD1	4832.12	-0.539627	0.255867	-2.10902	0.0349432	0.210433	Intronless
MEF1	4831.82	-0.18847	0.198555	-0.949206	0.342516	0.712619	Intronless
AVT7	4831.57	-0.684483	0.404812	-1.69086	0.0908626	0.378658	Intronless
UTR2	4830.69	-0.620246	0.492833	-1.25853	0.2082	0.574006	Intronless
UBI4	4830.11	-0.280711	0.361873	-0.775717	0.437916	0.787829	Intronless
SNF6	4829.9	-0.0695761	0.326922	-0.212822	0.831466	0.966889	Intronless
TRS33	4828.54	0.106269	0.34678	0.306445	0.759266	0.940457	Intronless
MMS21	4828.46	-0.346079	0.682037	-0.50742	0.61186	0.880816	Intronless
RHO1	4827.67	-0.199826	0.307839	-0.649126	0.516257	0.835087	Intronless
IMP4	4826.42	0.212427	0.334285	0.635468	0.525123	0.839565	Intronless
CTR3	4826.39	0.298916	0.796073	0.375488	0.707297	0.921986	Intronless
GGC1	4826.12	0.206267	0.670272	0.307737	0.758283	0.939611	Intronless
SRB8	4824.96	-0.49108	0.938741	-0.523126	0.600886	0.875806	Intronless
CLG1	4822.88	-0.698103	0.597574	-1.16823	0.242715	0.61635	Intronless
AIM1	4821.87	-0.864671	0.592187	-1.46013	0.144254	0.476723	Intronless
YMR122W-A	4821.73	0.11216	0.27209	0.412216	0.680181	0.914011	Intronless
PEX11	4821.53	-0.0870414	0.163525	-0.532282	0.594531	0.873387	Intronless
HNT1_2	4820.01	0.0730468	0.268172	0.272388	0.785324	0.951388	Unspliced
BUD9	4819.41	-0.670881	0.477184	-1.40592	0.159749	0.501496	Intronless
KSP1	4816.6	-0.182383	0.213257	-0.855228	0.392425	0.751403	Intronless
GCD7	4815.67	-0.135258	0.33051	-0.409241	0.682363	0.914589	Intronless
EFT1	4815.04	-0.0676618	0.203898	-0.331841	0.740009	0.935455	Intronless
NOP4	4814.43	0.279029	0.334292	0.834687	0.403894	0.761406	Intronless
YTA12	4814.42	-0.420902	0.206602	-2.03726	0.0416242	0.231694	Intronless
YHR113W	4814.13	0.221788	0.658397	0.336861	0.736222	0.932951	Intronless
YEL068C	4811.76	-0.298636	0.677769	-0.440616	0.659491	0.903087	Intronless
YJL144W	4811.17	-0.0669452	0.325542	-0.205642	0.83707	0.969116	Intronless
DOT5	4809.86	-0.691317	0.651644	-1.06088	0.288744	0.667381	Intronless
BIM1	4808.5	-0.0354256	0.145408	-0.243629	0.807518	0.959131	Intronless
CRM1	4808.06	-0.322473	0.406063	-0.794145	0.427111	0.779241	Intronless
WHI2	4807.49	-0.125409	0.306549	-0.409099	0.682467	0.914589	Intronless
SNA3	4803.37	-0.0270447	0.214935	-0.125827	0.899869	0.989601	Intronless
RSM23	4803.01	-0.577908	0.524607	-1.1016	0.270636	0.648792	Intronless
YKL187C	4801.01	0.487373	0.479706	1.01598	0.309638	0.687717	Intronless
SEC53	4800.64	0.198009	0.176771	1.12014	0.262653	0.640322	Intronless
REG1	4800.57	-0.336215	0.273012	-1.2315	0.218135	0.587474	Intronless
APM4	4800.43	-0.255522	0.164609	-1.5523	0.12059	0.43913	Intronless
MED11	4800.43	0.133425	0.345469	0.386214	0.699338	0.918749	Intronless
VTC2	4799.35	-0.288058	0.14739	-1.95439	0.0506546	0.266487	Intronless
KEI1	4798.56	0.157531	0.206176	0.764061	0.444831	0.79134	Spliced
NHP6A	4798.27	-0.414358	0.508678	-0.814576	0.415315	0.77145	Intronless
SNT309	4798.03	0.406745	0.149068	2.72859	0.00636066	0.0653792	Intronless
PHO85	4797.22	0.408546	0.598891	0.682171	0.495131	0.827197	Spliced
AAH1	4792.5	-0.343042	0.63998	-0.53602	0.591945	0.872424	Intronless
RPL6A	4789.58	-0.663683	0.633049	-1.04839	0.294458	0.671143	Spliced
YHR145C	4787.45	0.490651	0.259162	1.89322	0.0583285	0.291304	Intronless
YGR127W	4785.72	-0.0641179	0.300257	-0.213543	0.830903	0.966762	Intronless
HRB1	4785.68	-0.423947	0.375073	-1.13031	0.258348	0.634242	Spliced
YOR032W-A	4784.94	0.206963	0.32779	0.631391	0.527785	0.840678	Intronless
CDC55	4784.6	0.0121388	0.244862	0.0495739	0.960462	0.998147	Intronless
IRC25	4783.42	0.162249	0.265731	0.610576	0.541481	0.847789	Intronless
ERV2	4783.05	-0.518649	0.491662	-1.05489	0.291476	0.66877	Intronless
SPN1	4782.56	-0.48387	0.516976	-0.935963	0.349292	0.71891	Intronless
UPS2	4781.79	0.0327713	0.308161	0.106345	0.915309	0.991679	Intronless
HEK2	4781.5	0.182591	0.678674	0.269041	0.787898	0.952187	Intronless
RAV2	4781.5	-0.0529572	0.171786	-0.308274	0.757874	0.939611	Intronless
HMT1	4780.52	-0.238194	0.474063	-0.502452	0.61535	0.882856	Intronless
MIM1	4778.39	-0.75303	0.625911	-1.20309	0.22894	0.599923	Intronless
UFD1	4777.34	-0.280021	0.174866	-1.60135	0.109299	0.421426	Intronless
SSE1	4774.38	-0.256006	0.155108	-1.6505	0.0988415	0.399421	Intronless
YTH1	4774.15	-0.235351	0.269774	-0.872401	0.38299	0.747172	Intronless
MSP1	4773.92	-0.586507	0.533738	-1.09887	0.271826	0.649846	Intronless
SYS1	4772.68	0.00465577	0.284041	0.0163912	0.986922	0.998147	Intronless
FLO8	4772.13	-0.842873	0.589816	-1.42904	0.152992	0.489372	Intronless
YNL285W	4771.81	0.148155	0.170445	0.869226	0.384723	0.748501	Intronless
HBS1	4771.66	-0.223926	0.194876	-1.14907	0.250527	0.625365	Intronless
SAP30	4770.99	0.537176	0.240583	2.23281	0.0255616	0.170172	Intronless
ECM10	4769.65	-0.568592	0.637838	-0.891436	0.372695	0.738643	Intronless
ISY1	4768.23	0.156659	0.14915	1.05035	0.293559	0.670611	Intronless
SHS1	4767.91	-0.198005	0.24494	-0.808381	0.418871	0.77397	Intronless
TEF2	4766.85	-0.178577	0.212368	-0.840888	0.400411	0.758066	Intronless
YBL107C	4766.77	-0.385268	0.448895	-0.858258	0.39075	0.750652	Intronless
POP5	4765.94	0.385412	0.16628	2.31785	0.0204577	0.146976	Intronless
YEL067C	4764.77	0.108118	0.276337	0.391254	0.695609	0.917549	Intronless
VMA9	4761.94	-0.0106681	0.482968	-0.0220887	0.982377	0.998147	Spliced
MNL1	4760.85	-0.781496	0.440662	-1.77346	0.0761527	0.339293	Intronless
SHE10	4760.33	-0.365304	0.178277	-2.04908	0.0404544	0.228287	Intronless
SEE1	4758.16	0.212637	0.134485	1.58112	0.11385	0.429638	Intronless
RTF1	4757.77	-0.141365	0.308511	-0.458218	0.646796	0.896242	Intronless
PSR1	4757.53	0.456111	0.221295	2.0611	0.0392935	0.224158	Intronless
OCA1	4756.63	-0.310049	0.452844	-0.68467	0.493552	0.826486	Intronless
RIP1	4754.92	-0.072058	0.27254	-0.264394	0.791476	0.953837	Intronless
YLR307C-A	4754.9	-0.0194301	0.464376	-0.0418412	0.966625	0.998147	Intronless
HSP104	4754.85	-0.593003	0.495707	-1.19628	0.231588	0.602741	Intronless
NFI1	4754.34	-0.503605	0.40373	-1.24738	0.212257	0.57909	Intronless
REX2	4753.33	0.0486253	0.282545	0.172097	0.863361	0.977789	Intronless
LAP4	4753.03	-0.732778	0.368608	-1.98796	0.046816	0.250496	Intronless
PWP1	4752.38	-0.321598	0.558688	-0.575631	0.564865	0.859826	Intronless
PRP5_2	4750.24	-0.434954	0.917757	-0.473931	0.635549	0.893028	Unspliced
YER078W-A	4750	-0.0991235	0.436804	-0.226929	0.820479	0.961898	Intronless
SPP2	4749.38	0.127792	0.303568	0.420968	0.673779	0.910494	Intronless
YER010C	4747.97	0.0617262	0.178814	0.345198	0.729946	0.932326	Intronless
FAA3	4747.77	-0.783244	0.530117	-1.47749	0.139544	0.470397	Intronless
NSP1	4747.35	0.187244	0.24152	0.775274	0.438178	0.787829	Spliced
HST2	4746.92	-0.518455	0.427978	-1.2114	0.22574	0.596372	Intronless
ATF2	4745.53	-0.325975	0.342547	-0.951621	0.341289	0.711949	Intronless
LST8	4743.97	-0.354134	0.257183	-1.37697	0.168521	0.516115	Intronless
SAM35	4742.57	-0.23506	0.226859	-1.03615	0.300131	0.678245	Intronless
CLB5	4741.65	-0.34634	0.509112	-0.680281	0.496326	0.827429	Intronless
HGH1	4741.22	0.57537	0.148955	3.86271	0.000112135	0.00265771	Intronless
DPB4	4740.96	0.23416	0.228983	1.02261	0.306493	0.685559	Intronless
KOG1	4740.93	-0.582601	0.690994	-0.843135	0.399153	0.757838	Intronless
MET14	4740.43	0.137292	0.657807	0.208712	0.834673	0.967845	Intronless
TPC1	4740.11	-0.317672	0.445538	-0.713007	0.475841	0.813542	Intronless
HOS1	4739.76	-0.275059	0.638936	-0.430496	0.666835	0.906512	Intronless
PTP3	4739.35	-0.552497	0.42273	-1.30697	0.191222	0.54748	Intronless
PGI1	4739.01	-0.501129	0.24789	-2.02158	0.0432197	0.236662	Intronless
YLR460C	4736.6	-0.50229	0.342615	-1.46605	0.142635	0.474652	Intronless
GCN3	4735.21	-0.0933049	0.419596	-0.222368	0.824027	0.963781	Intronless
YJL133C-A	4734.56	-0.112096	0.209509	-0.535042	0.592621	0.872424	Intronless
RPC19	4733.91	-0.564626	0.390362	-1.44642	0.148061	0.482645	Intronless
LST7	4731.96	0.446427	0.143587	3.1091	0.00187656	0.0260459	Intronless
PET10	4729.39	0.0661127	0.691475	0.0956111	0.923829	0.994544	Intronless
RNH201	4728.1	-0.549011	0.254407	-2.158	0.0309277	0.194093	Intronless
MRPL13	4726.81	0.16154	0.68126	0.237119	0.812564	0.959962	Intronless
MCT1	4726.24	-0.542172	0.627529	-0.863979	0.3876	0.749697	Intronless
YIL161W	4725.9	0.31629	0.181772	1.74004	0.081852	0.355723	Intronless
YGL117W	4721.75	-0.0543428	0.351299	-0.154691	0.877065	0.982278	Intronless
NBA1	4721.75	0.327525	0.173398	1.88886	0.0589099	0.292303	Intronless
RET2	4718.74	-0.364083	0.349883	-1.04059	0.298068	0.675132	Intronless
YOP1_2	4718.67	-0.298233	0.209284	-1.42502	0.154151	0.491304	Unspliced
KEM1	4718.06	-0.37321	0.199292	-1.87268	0.0611132	0.298723	Intronless
TAF12	4717.49	-0.151039	0.20961	-0.720569	0.471175	0.809993	Intronless
TPA1	4717.28	0.196039	0.202018	0.970403	0.331846	0.706516	Intronless
PEP8	4713.36	-0.182024	0.172442	-1.05557	0.291165	0.66877	Intronless
FYV4	4709.27	-0.63397	0.712647	-0.889598	0.373682	0.739508	Intronless
ARD1	4709.04	-0.603367	0.589843	-1.02293	0.306342	0.685542	Intronless
ELA1	4708.22	-0.87665	0.467344	-1.87581	0.0606811	0.297454	Intronless
YLR290C	4708.2	-0.110581	0.327655	-0.337492	0.735746	0.932951	Intronless
RVB2	4706.89	0.146029	0.815847	0.178991	0.857945	0.974975	Intronless
ILV1	4705.81	-0.898887	0.560677	-1.60322	0.108887	0.420723	Intronless
PPM1	4705.48	-0.342552	0.274203	-1.24926	0.211569	0.578355	Intronless
HXT3	4704.97	-0.25495	0.381847	-0.667675	0.504341	0.829308	Intronless
YCR087C-A	4703.2	0.444774	0.185809	2.39372	0.0166783	0.128526	Intronless
YNL097C-B	4703.18	0.0492954	0.246293	0.20015	0.841363	0.970544	Intronless
IWR1_2	4703.14	-0.452579	0.738825	-0.612566	0.540163	0.846596	Unspliced
PAM1	4701.62	-0.553797	0.173599	-3.19009	0.0014223	0.0208143	Intronless
HLJ1	4700.88	-0.410675	0.377535	-1.08778	0.276693	0.654008	Intronless
BOR1	4700.75	-0.578929	0.781592	-0.740705	0.458872	0.801226	Intronless
BNA6	4700.24	0.0645101	0.697409	0.0924997	0.926301	0.995585	Intronless
YMR206W	4699.3	-0.332321	0.608936	-0.54574	0.585244	0.869979	Intronless
FAD1	4698.37	-0.568906	0.382579	-1.48703	0.137007	0.466529	Intronless
CDC12	4696.5	-0.443451	0.518023	-0.856046	0.391972	0.751403	Intronless
MRPL40	4690.26	-0.681872	0.368496	-1.85042	0.0642531	0.307959	Intronless
YLR040C	4688.39	-0.110789	0.163384	-0.678091	0.497714	0.828151	Intronless
COG1	4687.92	0.130425	0.173207	0.752999	0.45145	0.796127	Intronless
PUS7	4687.4	0.276114	0.284047	0.972071	0.331015	0.706516	Intronless
YER186C	4686.98	-0.121346	0.267141	-0.454241	0.649655	0.898603	Intronless
GCD1	4685.1	-0.414457	0.485617	-0.853465	0.393401	0.752438	Intronless
CAT5	4684.85	-0.109193	0.230468	-0.47379	0.635649	0.893028	Intronless
YGL082W	4684.57	-0.585005	0.514009	-1.13812	0.25507	0.631397	Intronless
SRP68	4683.86	-0.30472	0.571283	-0.533396	0.593759	0.873168	Intronless
WHI5	4683.64	-0.432539	0.813085	-0.531972	0.594745	0.873501	Intronless
MAK21	4682.74	0.379031	0.315471	1.20148	0.229565	0.600375	Intronless
RPS29A	4682.18	0.273032	0.165065	1.65409	0.0981101	0.398088	Spliced
PTM1	4681.57	-0.696081	0.433703	-1.60497	0.1085	0.42011	Intronless
ACT1_2	4681.45	0.584979	0.204045	2.86692	0.00414487	0.0478046	Unspliced
UTR1	4681.43	-0.0496603	0.349943	-0.14191	0.887151	0.986524	Intronless
KRE6	4680.58	-0.613461	0.636031	-0.964514	0.334788	0.706775	Intronless
APS3	4679.7	-0.0411995	0.292832	-0.140693	0.888112	0.986524	Spliced
STP1	4676.82	0.262064	0.194212	1.34937	0.177219	0.528784	Intronless
YDR266C	4675.71	0.238044	0.152481	1.56114	0.118491	0.435869	Intronless
KAE1	4675.47	0.0338305	0.207599	0.162961	0.870549	0.979669	Intronless
MIS1	4675.3	0.236657	0.783952	0.301877	0.762746	0.941585	Intronless
DIG1	4674.89	-0.222718	0.34386	-0.647698	0.51718	0.835422	Intronless
SLD3	4673.99	-0.826296	0.606073	-1.36336	0.172769	0.522398	Intronless
NCS6	4672.68	0.191389	0.166675	1.14828	0.250854	0.625573	Intronless
APS1	4672.46	-0.284452	0.457123	-0.622264	0.533768	0.843526	Intronless
PYC2	4672.08	-0.511399	0.297169	-1.7209	0.0852681	0.365049	Intronless
IZH4	4671.81	-0.266393	0.368699	-0.722522	0.469974	0.80838	Intronless
VAN1	4670.19	-0.205345	0.196478	-1.04513	0.295962	0.673013	Intronless
SEC21	4669.93	0.299669	0.753853	0.397516	0.690987	0.915865	Intronless
YSC83	4669.81	-0.217037	0.295019	-0.735673	0.46193	0.804403	Intronless
CDC28	4669.71	-0.00269347	0.280879	-0.00958943	0.992349	0.998147	Intronless
YBR191W-A	4669.51	0.0847448	0.219446	0.386176	0.699367	0.918749	Intronless
RHO2	4669.44	0.248692	0.158336	1.57067	0.11626	0.432679	Intronless
ALG13	4668.68	-0.310985	0.231968	-1.34064	0.180038	0.531787	Intronless
SFG1	4668.49	-0.146397	0.359716	-0.40698	0.684023	0.915584	Intronless
MBA1	4668.07	-0.565408	0.457395	-1.23615	0.216404	0.585998	Intronless
MAG1	4666.23	-0.305108	0.291017	-1.04842	0.294446	0.671143	Intronless
TSC10	4665.57	-0.13941	0.445793	-0.312723	0.754491	0.93945	Intronless
AIM25	4665.22	0.0654492	0.22941	0.285294	0.775419	0.945916	Intronless
ASP1	4665.16	-0.820516	0.524408	-1.56465	0.117664	0.434438	Intronless
CUE5	4665.06	-0.901358	0.477412	-1.88801	0.0590245	0.292451	Intronless
GDS1	4664.15	0.339435	0.272314	1.24648	0.212587	0.579759	Intronless
YDL016C	4663.69	0.210461	0.116582	1.80526	0.0710344	0.324453	Intronless
DSK2	4663.67	-0.9351	0.57693	-1.62082	0.105056	0.411901	Intronless
POS5	4663.46	0.234599	0.262499	0.893714	0.371475	0.737709	Intronless
CST6	4662.72	-0.412534	0.192946	-2.13808	0.0325102	0.199842	Intronless
TGL4	4661.11	-0.324949	0.332924	-0.976045	0.329042	0.705684	Intronless
YJR098C	4659.86	-0.564584	0.619686	-0.91108	0.362253	0.729265	Intronless
RPD3	4657.33	-0.621748	0.375983	-1.65366	0.0981973	0.398088	Intronless
MLS1	4655.18	-0.372196	0.738997	-0.503651	0.614507	0.88256	Intronless
KIN4	4653.1	-0.429225	0.427437	-1.00418	0.315291	0.692535	Intronless
AIM11	4651.09	-0.170438	0.137643	-1.23826	0.215619	0.584974	Spliced
SEC18	4650.66	-0.410791	0.184302	-2.22891	0.0258201	0.1709	Intronless
DCP1	4650.54	-0.0585564	0.468783	-0.124911	0.900594	0.989601	Intronless
OPY2	4650.46	0.216918	0.719835	0.301345	0.763152	0.941585	Intronless
CTI6	4650.4	-0.34809	0.1909	-1.82342	0.0682399	0.317003	Intronless
TAH18	4649.54	-0.509712	0.451991	-1.1277	0.259445	0.63575	Intronless
TEF1	4649.27	0.0141117	0.161628	0.0873096	0.930425	0.996798	Intronless
GPX2	4648.53	-0.454462	0.719719	-0.631443	0.527751	0.840678	Intronless
PPX1	4647.86	-0.305482	0.412875	-0.73989	0.459367	0.801683	Intronless
YDL027C	4647.81	-0.159778	0.245422	-0.651034	0.515025	0.834114	Intronless
ENT1	4647.44	0.569145	0.734635	0.774731	0.438498	0.787985	Intronless
COQ9	4646.69	0.382534	0.714941	0.535056	0.592611	0.872424	Intronless
SCD6	4645.39	-0.665253	0.390942	-1.70167	0.0888177	0.37284	Intronless
UPF3	4645.06	0.119115	0.223452	0.533065	0.593988	0.873318	Intronless
ATP11	4644.82	0.0873704	0.689054	0.126798	0.899101	0.989601	Intronless
ASH1	4644.07	0.0237777	0.376873	0.063092	0.949693	0.998147	Intronless
DAL3	4643.16	-0.00490856	0.526411	-0.00932458	0.99256	0.998147	Intronless
YGR122C-A	4640.73	-0.207764	0.640365	-0.324446	0.745601	0.937982	Intronless
SNA2	4640.22	-0.18586	0.292779	-0.634811	0.525551	0.83964	Intronless
YCG1	4640.07	-0.386052	0.804647	-0.479778	0.631385	0.890342	Intronless
STE3	4639.71	-0.794237	0.742265	-1.07002	0.284611	0.663066	Intronless
MPP6	4637.21	0.441002	0.170001	2.59411	0.0094836	0.0879145	Intronless
YLR149C	4637.03	-0.407305	0.42116	-0.967102	0.333493	0.706516	Intronless
LIP5	4636.75	-0.390463	0.4122	-0.947267	0.343503	0.71352	Intronless
CDS1	4635.5	-0.41243	0.382776	-1.07747	0.28127	0.659346	Intronless
YDR034C-A	4635.28	0.461328	0.264885	1.74162	0.0815749	0.355191	Intronless
PNO1	4635.01	-0.853005	0.614314	-1.38855	0.16497	0.509786	Intronless
YIM1	4634.93	0.0916948	0.748858	0.122446	0.902546	0.989601	Intronless
TOM70	4634.67	0.853597	0.641607	1.33041	0.183385	0.536452	Intronless
SSC1	4634.25	-0.257133	0.34459	-0.7462	0.455547	0.798248	Intronless
RPL22B_2	4633.88	-0.180106	0.411249	-0.437948	0.661424	0.904446	Unspliced
UBP13	4633.11	0.50663	0.214258	2.36457	0.0180509	0.13651	Intronless
YOL057W	4631.84	-0.0168216	0.290982	-0.0578097	0.9539	0.998147	Intronless
SEC24	4630.05	-0.555506	0.379918	-1.46217	0.143693	0.47638	Intronless
BET5	4628.51	0.166507	0.328847	0.506336	0.612621	0.881127	Intronless
SNU56	4628.16	-0.769595	0.567524	-1.35606	0.175081	0.526388	Intronless
YKU80	4628.15	-0.691637	0.711347	-0.972292	0.330905	0.706516	Intronless
CDC53	4627.79	-0.218381	0.229646	-0.950945	0.341632	0.711981	Intronless
FMN1	4626.74	-0.0743889	0.192955	-0.385525	0.699848	0.918755	Intronless
YLL054C	4625.4	-0.499232	0.780548	-0.639592	0.522438	0.839483	Intronless
YLR042C	4624.9	-0.484465	0.540028	-0.89711	0.36966	0.735776	Intronless
IMP3	4624.82	0.268635	0.365594	0.734789	0.462468	0.804403	Intronless
SOH1	4624.62	-0.223983	0.482957	-0.463774	0.642809	0.894674	Intronless
AIM33	4624.23	-0.783504	0.42974	-1.82321	0.0682723	0.317003	Intronless
ERG8	4624.21	-0.423919	0.42538	-0.996566	0.318975	0.696635	Intronless
MDH1	4624.16	-0.835841	0.429544	-1.94588	0.051669	0.269938	Intronless
RAD9	4623.59	-0.289994	0.786253	-0.368831	0.712254	0.924383	Intronless
PRE1	4622.83	0.184638	0.252082	0.73245	0.463894	0.804403	Intronless
MSK1	4622.43	-0.301851	0.25576	-1.18021	0.237917	0.611141	Intronless
MAK5	4622.25	0.111395	0.35409	0.314594	0.75307	0.939443	Intronless
HIS5	4622.13	-0.355905	0.361209	-0.985317	0.324468	0.701886	Intronless
SEC14	4621.7	-0.624291	0.729769	-0.855465	0.392294	0.751403	Spliced
YGL108C	4621.68	-0.206708	0.392026	-0.527282	0.597998	0.875481	Intronless
YGP1	4621.62	-0.724164	0.32902	-2.20097	0.0277378	0.180156	Intronless
RRG9	4621.41	0.186842	0.199438	0.936845	0.348838	0.718405	Intronless
YCR018C-A	4620.64	-1.06337	0.622363	-1.70861	0.0875237	0.37072	Intronless
IPT1	4620.62	0.0773547	0.311344	0.248454	0.803783	0.95895	Intronless
COR1	4620.57	-0.435739	0.436364	-0.998567	0.318004	0.695772	Intronless
MRPL22	4619.67	0.0540588	0.841274	0.0642583	0.948765	0.998147	Intronless
HST4	4619.54	0.0267622	0.288176	0.0928675	0.926009	0.995585	Intronless
RPL18B_2	4617.78	0.265208	0.622624	0.425953	0.670142	0.908228	Unspliced
ARO10	4617.1	-0.471527	0.386976	-1.21849	0.223037	0.593475	Intronless
NBP35	4616.18	-0.136391	0.165297	-0.825123	0.409302	0.765443	Intronless
YLR065C	4615.66	-1.08652	0.592188	-1.83476	0.0665417	0.313911	Intronless
YGL230C	4615.58	-0.148299	0.307038	-0.483	0.629096	0.889529	Intronless
SEC31	4614.9	-0.0529947	0.361302	-0.146677	0.883387	0.985717	Intronless
YBR099C	4614.51	0.271688	0.358934	0.756931	0.449091	0.795064	Intronless
DGA1	4614	0.0100121	0.222379	0.0450227	0.964089	0.998147	Intronless
YOP1	4613.82	-0.328044	0.537571	-0.610234	0.541707	0.847789	Spliced
ZPR1	4613.73	0.15858	0.500302	0.316968	0.751268	0.939443	Intronless
TSR4	4613.35	-0.169288	0.283706	-0.596703	0.550706	0.853623	Intronless
TMA16	4612.85	-0.542783	0.48943	-1.10901	0.267426	0.645684	Intronless
TRR2	4611.79	-0.47399	0.194426	-2.4379	0.0147729	0.11797	Intronless
RFC2	4611.28	-0.290883	0.40252	-0.722655	0.469892	0.80838	Intronless
SNX4	4608.82	-0.542319	0.266759	-2.033	0.0420529	0.233019	Intronless
MRP20	4607.64	-0.519978	0.466677	-1.11421	0.265188	0.643788	Intronless
YOR316C-A	4607.62	-0.521937	0.416122	-1.25429	0.209737	0.575622	Intronless
DUS1	4605.93	0.00431877	0.32589	0.0132522	0.989427	0.998147	Intronless
YGR045C	4605.64	-0.190951	0.241434	-0.790905	0.428999	0.780071	Intronless
MET6	4604.69	0.267744	0.616788	0.434095	0.664219	0.906255	Intronless
RRP46	4604.54	-0.554405	0.684518	-0.80992	0.417986	0.773297	Intronless
VTC4	4604.09	-0.614039	0.43464	-1.41275	0.157729	0.49691	Intronless
ANT1	4601.98	0.167359	0.163957	1.02075	0.307374	0.685836	Intronless
RPS14B	4601.42	-0.982726	0.628614	-1.56332	0.117977	0.434739	Spliced
SPP382	4600.3	-0.582833	0.795415	-0.732741	0.463717	0.804403	Intronless
UBX2	4598.63	0.293563	0.288996	1.0158	0.309722	0.687717	Intronless
YNL217W	4598.4	-0.103192	0.346757	-0.297592	0.766015	0.942435	Intronless
RPS25B	4596.94	0.241351	0.181576	1.3292	0.183781	0.536638	Spliced
EMI2	4595.09	0.00208788	0.363073	0.00575058	0.995412	0.998147	Intronless
snR49	4594.63	-0.390164	0.514391	-0.758498	0.448153	0.793763	Intronless
YER064C	4593.38	0.734489	0.189904	3.86768	0.000109876	0.0026222	Intronless
FET3	4593.02	-0.196681	0.498649	-0.394427	0.693266	0.916163	Intronless
GAL7	4591.87	0.286651	0.274244	1.04524	0.295911	0.673013	Intronless
LSP1	4591.38	-0.0238942	0.688577	-0.0347008	0.972318	0.998147	Intronless
UTP6	4591.33	-0.98297	0.511275	-1.92259	0.054532	0.278804	Intronless
EAF1	4590.85	-0.7856	0.712407	-1.10274	0.27014	0.64829	Intronless
STF1	4590.26	0.00358887	0.737526	0.0048661	0.996117	0.998147	Intronless
NAS2	4589.88	-0.434127	0.479737	-0.904927	0.365504	0.732601	Intronless
MRP4	4588.67	-0.518763	0.513292	-1.01066	0.31218	0.689435	Intronless
PRP5	4587.99	-0.644767	0.588745	-1.09515	0.273449	0.651461	Spliced
YPS1	4587.5	0.175117	0.861199	0.203341	0.838868	0.96947	Intronless
ARX1	4587.41	0.0614831	0.487719	0.126062	0.899682	0.989601	Intronless
NTC20	4586.22	-0.0442723	0.300435	-0.14736	0.882848	0.985363	Intronless
YHR003C	4583.55	0.237473	0.264597	0.897489	0.369458	0.73561	Intronless
OXR1	4582.09	0.155288	0.725784	0.213959	0.830579	0.966762	Intronless
YPL225W	4581.46	-0.104598	0.393815	-0.265601	0.790547	0.95355	Intronless
RPL38	4580.49	0.105028	0.190537	0.551222	0.581481	0.869696	Intronless
YFL041W-A	4580.22	-0.253406	0.292814	-0.865415	0.386811	0.749392	Intronless
GSP1	4579.37	-0.63544	0.706133	-0.899887	0.36818	0.73478	Intronless
TRM9	4578.65	0.111221	0.171807	0.64736	0.517399	0.835422	Intronless
TAL1	4578.31	-0.498151	0.245819	-2.0265	0.0427137	0.235575	Intronless
MMS1	4575.98	-1.08478	0.706032	-1.53645	0.124428	0.445576	Intronless
CYB5	4575.18	-0.710439	0.470187	-1.51097	0.130795	0.45524	Intronless
YOR300W	4572.86	0.232374	0.240493	0.966241	0.333924	0.706516	Intronless
CDC43	4572.4	0.216786	0.165294	1.31152	0.189684	0.54533	Intronless
YOL103W-B	4571.88	0.0760693	0.131491	0.578512	0.562918	0.858838	Intronless
THI13	4569.92	-0.342725	0.226068	-1.51602	0.129514	0.45389	Intronless
YLR050C	4569.91	0.249803	0.112092	2.22856	0.0258433	0.1709	Intronless
SED5	4569.77	0.037405	0.276114	0.13547	0.892241	0.988126	Intronless
RSA1	4569.02	0.242584	0.222603	1.08976	0.275818	0.653335	Intronless
IES3	4566.8	-0.22451	0.567337	-0.395725	0.692308	0.91595	Intronless
YOR111W	4566.6	0.0262507	0.261205	0.100499	0.919948	0.992608	Intronless
MRS4	4566.04	-0.492957	0.234247	-2.10443	0.0353412	0.21122	Intronless
MCM1	4565.59	-0.543733	0.53254	-1.02102	0.307246	0.685836	Intronless
YML007C-A	4564.9	0.398536	0.306285	1.30119	0.193193	0.551283	Intronless
TCB3	4564.51	-0.449715	0.248788	-1.80763	0.0706647	0.323407	Intronless
GTR2	4563.66	-0.195224	0.435015	-0.448776	0.653594	0.901387	Intronless
SDC1	4563.23	-0.031985	0.499667	-0.0640126	0.94896	0.998147	Intronless
XRS2	4563.05	-0.677652	0.871114	-0.777914	0.43662	0.78694	Intronless
YJR112W-A	4562.16	-0.251416	0.547359	-0.459326	0.646	0.89611	Intronless
TMN2	4561.56	0.11405	0.812909	0.140299	0.888424	0.986524	Intronless
SMD1	4559.84	0.457555	0.131378	3.48274	0.000496302	0.0091037	Intronless
TRP3	4559.82	-0.0559123	0.201289	-0.277771	0.781188	0.948824	Intronless
RPS24B	4559.73	-0.492848	0.722537	-0.682108	0.495171	0.827197	Spliced
CRC1	4559.65	0.329945	0.409167	0.806382	0.420023	0.774157	Intronless
YER152C	4557.74	0.33059	0.217622	1.51911	0.128736	0.451991	Intronless
SMF2	4557.17	-0.223735	0.541604	-0.413097	0.679536	0.914011	Intronless
PIL1	4557.16	-0.745519	0.410731	-1.81511	0.0695076	0.320277	Intronless
ICS2	4556.06	0.129276	0.239015	0.54087	0.588597	0.871711	Intronless
SEC23	4555.9	-1.13858	0.622499	-1.82905	0.0673922	0.316185	Intronless
RSA4	4554.58	0.128572	0.356256	0.360897	0.718176	0.927056	Intronless
IPI1	4550.67	-0.273043	0.32146	-0.849384	0.395668	0.754395	Intronless
FTR1	4550.66	0.210963	0.262211	0.804556	0.421076	0.774649	Intronless
YPR114W	4549.06	-0.639541	0.732144	-0.873519	0.38238	0.747172	Intronless
PRP43	4547.06	-0.245223	0.484609	-0.506022	0.612841	0.881127	Intronless
GEP4	4546.07	0.112876	0.194696	0.579755	0.56208	0.858239	Intronless
NOP2	4545.91	-0.319743	0.517237	-0.618176	0.53646	0.845417	Intronless
SRL1	4545.63	0.471321	0.270405	1.74302	0.0813301	0.354411	Intronless
SRO9	4544.23	-0.160762	0.326863	-0.491833	0.622838	0.886628	Intronless
REX3	4544.01	0.20756	0.187594	1.10644	0.268538	0.646684	Intronless
PMU1	4542.21	0.215162	0.168522	1.27676	0.201686	0.564312	Intronless
TIM22	4541.8	-0.00583887	0.321856	-0.0181412	0.985526	0.998147	Intronless
TIM54	4541.34	-0.462236	0.435296	-1.06189	0.288286	0.666994	Intronless
RPS9B_2	4540.73	0.0889844	0.574956	0.154767	0.877005	0.982278	Unspliced
HMRA2	4540.69	-0.0121895	0.312781	-0.0389713	0.968913	0.998147	Intronless
YOR304C-A	4539.43	-0.573852	0.460968	-1.24488	0.213174	0.580443	Intronless
RSM24	4539.1	-0.670404	0.467759	-1.43322	0.151794	0.487945	Intronless
LYP1	4538.74	-0.787567	0.697015	-1.12991	0.258512	0.63428	Intronless
PUF6	4537.44	0.0506354	0.559715	0.0904665	0.927917	0.995619	Intronless
RPL14B	4536.96	0.345592	0.189806	1.82077	0.0686422	0.317787	Spliced
SNA4	4536.54	-0.151955	0.550391	-0.276086	0.782482	0.950137	Intronless
YJL016W	4534.91	-0.221207	0.219427	-1.00811	0.313401	0.690804	Intronless
YCL056C	4532.85	0.0776552	0.306754	0.253151	0.800151	0.958098	Intronless
TIM21	4532.37	0.143451	0.852321	0.168306	0.866342	0.9783	Intronless
RAX2	4529.8	-0.364129	0.3656	-0.995978	0.319261	0.69676	Intronless
TTI1	4528.14	-0.370008	0.861926	-0.42928	0.667719	0.906512	Intronless
YPS6	4528.13	0.442684	0.286909	1.54294	0.122844	0.442654	Intronless
COA2	4527.56	0.143211	0.279406	0.512554	0.608263	0.880418	Intronless
COS2	4527.1	-0.310314	0.269197	-1.15274	0.249018	0.623254	Intronless
COS3	4527.1	-0.310314	0.269197	-1.15274	0.249018	0.623254	Intronless
NUP2	4525.73	-0.313643	0.254284	-1.23343	0.217414	0.586795	Intronless
STP2	4524.78	0.0173724	0.221984	0.0782593	0.937622	0.998147	Intronless
IOC4	4523.83	-0.145429	0.313148	-0.46441	0.642354	0.894674	Intronless
HEM13	4523.77	-0.649699	0.245594	-2.64542	0.00815896	0.0790342	Intronless
GNP1	4523.65	-0.921977	0.666959	-1.38236	0.166861	0.513311	Intronless
EMG1	4521.31	-0.667302	0.582446	-1.14569	0.251924	0.627014	Intronless
PBA1	4520.94	-0.137949	0.284833	-0.484317	0.628161	0.889529	Spliced
SAH1	4520.65	-0.272216	0.228915	-1.18916	0.234377	0.607021	Intronless
TRP4	4520.55	-0.0334131	0.275784	-0.121157	0.903567	0.989601	Intronless
HKR1	4519.84	-0.482212	0.710141	-0.679036	0.497115	0.827565	Intronless
TRX3	4519.35	0.00784211	0.824175	0.00951509	0.992408	0.998147	Intronless
MDM32	4518.51	0.136805	0.160848	0.850523	0.395034	0.754305	Intronless
BER1	4518.07	-0.227965	0.518823	-0.439389	0.660379	0.903698	Intronless
TIF4631	4517.79	-0.532636	0.728022	-0.731621	0.4644	0.804403	Intronless
snR77	4517.65	0.168471	0.171445	0.982652	0.325779	0.702155	Intronless
VTA1	4517.57	-0.201048	0.164882	-1.21934	0.222715	0.592846	Intronless
RPL30_2	4517.43	-0.701619	0.214957	-3.26399	0.00109856	0.0170264	Unspliced
FAR8	4517.07	-0.494617	0.300582	-1.64553	0.0998607	0.40113	Intronless
NFS1	4515.61	-0.650317	0.340518	-1.90979	0.0561606	0.28337	Intronless
YMR304C-A	4515.58	-1.02291	0.356415	-2.86999	0.0041049	0.0475025	Intronless
CUE4	4513.1	-0.218921	0.382905	-0.571738	0.5675	0.861555	Intronless
ESA1	4513.07	0.371626	0.242286	1.53383	0.125071	0.446489	Intronless
CHS7	4512.83	-0.0813409	0.165963	-0.490114	0.624053	0.887064	Intronless
PMR1	4512.36	0.220824	0.253336	0.871667	0.38339	0.747172	Intronless
BET2	4511.81	0.0115571	0.182627	0.0632824	0.949542	0.998147	Intronless
PML1	4511.32	0.248503	0.206402	1.20398	0.228599	0.599662	Intronless
ABF2	4509.98	-0.0780908	0.391028	-0.199706	0.84171	0.970782	Intronless
LSG1	4508.82	0.00709449	0.201533	0.0352027	0.971918	0.998147	Intronless
HVG1	4508.78	-0.529581	0.535895	-0.988217	0.323047	0.699326	Intronless
RRP4	4508.73	0.223667	0.298835	0.748462	0.454182	0.797696	Intronless
YHR162W	4508.07	-0.987466	0.641651	-1.53894	0.123818	0.444016	Intronless
YDR161W	4506.02	-0.233491	0.529992	-0.440555	0.659535	0.903087	Intronless
PFY1	4505.45	-0.930854	0.703677	-1.32284	0.185888	0.539146	Spliced
TSC3	4505.08	0.322928	0.155001	2.0834	0.037215	0.217879	Intronless
RAI1	4504.66	-0.190676	0.413076	-0.4616	0.644368	0.895468	Intronless
YPL071C	4504.64	-0.154602	0.443451	-0.348634	0.727364	0.930729	Intronless
YLR227W-B	4504.5	-0.0135207	0.250307	-0.0540164	0.956922	0.998147	Intronless
YMR315W	4504.42	0.875607	0.173775	5.03873	4.68639e-07	2.00758e-05	Intronless
YBL055C	4502.67	-0.22534	0.382167	-0.589637	0.555434	0.855057	Intronless
SFL1	4500.09	-0.48596	0.34382	-1.41341	0.157534	0.49691	Intronless
FET4	4499.78	-0.328312	0.286422	-1.14625	0.251691	0.626684	Intronless
EFT2	4495.89	0.357318	0.708612	0.504251	0.614085	0.88218	Intronless
YJL119C	4495.3	0.0620749	0.302851	0.204969	0.837597	0.969116	Intronless
YBR053C	4495.28	0.137928	0.715532	0.192763	0.847145	0.973595	Intronless
JJJ2	4495.05	-0.129163	0.792831	-0.162913	0.870587	0.979669	Intronless
snR37	4493.68	-0.397864	0.511409	-0.777977	0.436583	0.78694	Intronless
FBP1	4493.34	-0.019232	0.468296	-0.041068	0.967242	0.998147	Intronless
YJR056C	4492.87	-0.144098	0.432751	-0.332982	0.739148	0.934881	Intronless
PYK2	4491.78	-0.860922	0.291989	-2.94847	0.00319352	0.0393316	Intronless
HED1	4491.43	-0.55592	0.236822	-2.34741	0.0189042	0.139741	Intronless
CUS2	4490.63	0.203582	0.238025	0.855295	0.392388	0.751403	Intronless
RPL6B	4490.57	-0.0902039	0.281621	-0.320303	0.748739	0.938973	Spliced
VPS17	4490.28	-0.55874	0.236123	-2.36631	0.0179665	0.136021	Intronless
ATG19	4490	0.339732	0.755118	0.449905	0.652779	0.900803	Intronless
GPI16	4489.99	-0.403293	0.263059	-1.53309	0.125253	0.446675	Intronless
SBA1	4489.51	-0.631646	0.397141	-1.59048	0.111726	0.425967	Intronless
MEX67	4489.04	-0.0940561	0.286227	-0.328606	0.742453	0.936314	Intronless
PTC2	4488.91	-0.2449	0.572181	-0.428011	0.668643	0.907	Intronless
SPG1	4488	0.219648	0.652794	0.336475	0.736513	0.932951	Intronless
FAU1	4487.24	0.210315	0.134052	1.5689	0.116671	0.432679	Intronless
STB6	4487.22	-0.501326	0.741084	-0.676476	0.498739	0.828668	Intronless
YGR011W	4486.71	-0.255748	0.410547	-0.622943	0.533322	0.843071	Intronless
CUR1	4486.6	-0.329485	0.189813	-1.73584	0.0825916	0.357138	Intronless
YDR248C	4486.48	-0.00650271	0.210423	-0.0309031	0.975347	0.998147	Intronless
FRE8	4485.98	-0.811882	0.618636	-1.31237	0.189394	0.545026	Intronless
YBR242W	4485.8	0.155492	0.423235	0.367389	0.713329	0.924383	Intronless
SCP160	4485.77	-0.353645	0.527898	-0.669912	0.502914	0.829253	Intronless
ADP1	4485.6	-0.475044	0.267559	-1.77548	0.075819	0.338681	Intronless
YLR177W	4485.16	-0.686582	0.422388	-1.62548	0.10406	0.410202	Intronless
YJR157W	4485.06	0.159955	0.394074	0.405902	0.684815	0.915584	Intronless
ARP9	4484.8	0.0336135	0.146022	0.230195	0.81794	0.96153	Spliced
GID8	4484.71	-0.821134	0.42997	-1.90975	0.0561658	0.28337	Intronless
YCR041W	4484.67	-0.402753	0.435606	-0.92458	0.355184	0.72405	Intronless
YDR374W-A	4484.66	-0.993224	0.714126	-1.39082	0.164279	0.508904	Intronless
POA1	4484.63	0.0143483	0.252546	0.0568148	0.954693	0.998147	Intronless
BIO4	4484.14	-0.880743	0.682901	-1.28971	0.197152	0.556984	Intronless
ALK2	4483.72	-0.943468	0.341061	-2.76627	0.00567017	0.0603506	Intronless
DPB2	4481.87	-0.522956	0.454231	-1.1513	0.249609	0.624203	Intronless
KAR3	4481.49	-0.39529	0.802596	-0.492514	0.622356	0.886348	Intronless
SHE2	4480.76	-0.110459	0.387052	-0.285384	0.77535	0.945916	Intronless
NOB1	4480.63	-0.156658	0.406294	-0.385579	0.699809	0.918755	Intronless
PEP7	4480.56	-0.882141	0.791218	-1.11492	0.264887	0.64351	Intronless
YPL264C	4479.71	-0.176114	0.214533	-0.820915	0.411695	0.768044	Intronless
YHR214C-B	4479.27	0.255366	0.223604	1.14205	0.253435	0.629209	Intronless
YAP3	4476.64	0.153263	0.220103	0.696325	0.486225	0.820887	Intronless
ACM1	4476.03	-0.364017	0.245562	-1.48238	0.138239	0.467909	Intronless
DGK1	4476	0.105602	0.222974	0.473606	0.635781	0.893028	Intronless
MSH1	4474.1	-0.221961	0.597482	-0.371494	0.710269	0.923243	Intronless
TRM11	4473.54	0.0622684	0.381442	0.163245	0.870326	0.979669	Intronless
NGR1	4473.18	-0.420097	0.452158	-0.929093	0.352841	0.721342	Intronless
SLC1	4473.02	-0.177224	0.302719	-0.585442	0.55825	0.856754	Intronless
FMP48	4472.44	-0.474574	0.401346	-1.18246	0.237024	0.61111	Intronless
YOR186W	4472.13	-0.419927	0.175945	-2.3867	0.0170005	0.130426	Intronless
BST1	4470.94	-0.481919	0.638131	-0.755205	0.450126	0.795375	Intronless
ARC15	4470.93	0.119371	0.173309	0.688776	0.490964	0.823765	Intronless
SRB6	4470.44	-1.11104	0.72359	-1.53546	0.124672	0.445719	Intronless
GAL83	4470.03	-0.661307	0.314176	-2.10489	0.0353005	0.21122	Intronless
YDR340W	4469.61	0.126086	0.217691	0.579199	0.562455	0.858432	Intronless
RPS8B_2	4468.94	-0.514407	0.305414	-1.68429	0.0921248	0.381383	Unspliced
AHP1	4468.86	-0.375123	0.359508	-1.04343	0.296747	0.674354	Intronless
DUT1	4468.24	-1.06902	0.415446	-2.57319	0.0100767	0.0920512	Intronless
SRP54	4468.12	0.0078883	0.8035	0.00981743	0.992167	0.998147	Intronless
PHO8	4468.08	-0.419311	0.240527	-1.7433	0.0812819	0.354411	Intronless
HNT1	4465.64	0.213711	0.214138	0.998004	0.318277	0.695772	Spliced
YKL068W-A	4463.88	0.114622	0.613083	0.186961	0.851691	0.974091	Intronless
BPH1	4463.47	-0.635861	0.861851	-0.737785	0.460645	0.803359	Intronless
SML1	4463.45	-0.982209	0.682018	-1.44015	0.149824	0.486277	Intronless
SSS1	4462.84	-1.07832	0.678855	-1.58844	0.112188	0.426554	Intronless
RRP7	4462.75	-0.856883	0.18287	-4.68575	2.7894e-06	0.000100725	Intronless
YDR348C	4461.37	-0.0453621	0.310041	-0.14631	0.883677	0.985798	Intronless
YGR109W-B	4460.52	-1.04522	0.652985	-1.60068	0.109448	0.421711	Intronless
YGR205W	4459.59	-0.740211	0.372562	-1.98681	0.0469431	0.250787	Intronless
YFL052W	4458.74	0.540887	0.222506	2.43089	0.015062	0.11902	Intronless
SLY1	4458.67	-0.196259	0.194183	-1.01069	0.312165	0.689435	Intronless
ERI1	4457.93	0.0818152	0.80591	0.101519	0.919138	0.992367	Intronless
SKO1	4456.95	-0.162925	0.200827	-0.81127	0.417211	0.773126	Intronless
VPS25	4456.89	-0.0619113	0.206742	-0.299461	0.764588	0.94234	Intronless
YNL046W	4455.07	-0.0518386	0.165627	-0.312984	0.754293	0.93945	Intronless
YGL010W	4454.36	-0.162393	0.295678	-0.549224	0.582852	0.869696	Intronless
MMT2	4454.34	-0.267765	0.368803	-0.726037	0.467816	0.805826	Intronless
YOR248W	4454.17	-0.0454739	0.512139	-0.088792	0.929247	0.996162	Intronless
SPE1	4454.04	-0.288592	0.300106	-0.961634	0.336233	0.708439	Intronless
TAF4	4452.9	-0.423663	0.493403	-0.858655	0.390531	0.750652	Intronless
YHI9	4452.71	0.0764739	0.240118	0.318485	0.750117	0.939443	Intronless
LSR1	4452.68	0.021954	0.16277	0.134877	0.892709	0.988126	Intronless
YAR047C	4451.9	-0.1024	0.393117	-0.260482	0.794492	0.955571	Intronless
MRH4	4449.27	-1.13412	0.625042	-1.81447	0.0696058	0.320475	Intronless
MEP3	4447.66	0.394218	0.67466	0.584321	0.559004	0.857369	Intronless
CAF130	4447.5	-0.968451	0.73628	-1.31533	0.188399	0.542996	Intronless
YOR228C	4447.19	-0.563101	0.258886	-2.17509	0.0296233	0.188828	Intronless
RPS28A	4447.08	0.265616	0.159499	1.66531	0.0958508	0.391463	Intronless
BDF1	4446.87	-0.154048	0.280903	-0.548404	0.583414	0.869696	Intronless
MSC3	4446.56	-0.0706431	0.281374	-0.251065	0.801764	0.958666	Intronless
SEY1	4446.19	-0.136011	0.187492	-0.725422	0.468193	0.805872	Intronless
PAN5	4445.97	-1.02433	0.66955	-1.52988	0.126046	0.448574	Intronless
YOR192C-C	4445.76	0.48911	0.140106	3.49101	0.000481192	0.00896967	Intronless
VPS66	4445.62	-0.213985	0.387965	-0.551557	0.581252	0.869608	Intronless
VTH2	4444.99	-0.788767	0.692213	-1.13949	0.2545	0.630581	Intronless
VPS27	4444.46	-0.222963	0.269404	-0.827616	0.407888	0.76398	Intronless
RPL21B	4444.15	-0.944584	0.716093	-1.31908	0.187143	0.54073	Spliced
PET20	4443.34	-0.684596	0.743763	-0.920449	0.357338	0.72562	Intronless
YIL077C	4443.09	-0.697606	0.301728	-2.31204	0.0207755	0.148179	Intronless
MIG3	4442.25	-0.260678	0.164175	-1.58781	0.112329	0.426554	Intronless
CDC1	4441.85	-0.114933	0.322157	-0.35676	0.721272	0.927319	Intronless
SKG6	4441.36	-0.139651	0.281503	-0.496091	0.61983	0.885636	Intronless
YGL101W	4440.38	-0.042545	0.260039	-0.16361	0.870038	0.979538	Intronless
YHR033W	4439.85	0.727326	0.665304	1.09322	0.274295	0.65248	Intronless
TAE1	4439.01	-0.198447	0.527359	-0.376303	0.706691	0.921923	Intronless
HOL1	4438.65	-0.0981177	0.246995	-0.397246	0.691186	0.915865	Intronless
SLA1	4437.77	-0.296235	0.44346	-0.668008	0.504129	0.829308	Intronless
PFY1_2	4436.36	0.0614205	0.789114	0.0778348	0.937959	0.998147	Unspliced
MRPL8	4436.25	-0.0528442	0.689083	-0.0766878	0.938872	0.998147	Intronless
STF2	4435.3	-0.159732	0.4963	-0.321846	0.747569	0.93859	Intronless
EDE1	4435.11	-0.292026	0.319803	-0.913144	0.361167	0.729132	Intronless
CNB1	4434.96	-1.08003	0.601282	-1.79621	0.0724609	0.328359	Spliced
RAD52	4434.68	0.092601	0.326469	0.283644	0.776684	0.946697	Intronless
GSC2	4434.64	-0.468704	0.194842	-2.40556	0.0161476	0.125806	Intronless
NIP1	4434.6	0.318102	0.235121	1.35293	0.176079	0.52803	Intronless
SKS1	4434.49	-0.932299	0.559806	-1.6654	0.0958337	0.391463	Intronless
RGC1	4433.82	-0.0889618	0.226393	-0.392952	0.694355	0.917075	Intronless
TRM44	4433.06	-0.102611	0.28399	-0.361319	0.717861	0.927056	Intronless
RFC3	4431.37	0.201553	0.240189	0.839144	0.401388	0.759083	Intronless
RIF1	4429.64	-0.45812	0.847869	-0.540319	0.588977	0.871711	Intronless
SUI3	4428.61	0.197153	0.164945	1.19527	0.231983	0.603086	Intronless
OSM1	4428.52	-0.239727	0.14837	-1.61574	0.10615	0.414236	Intronless
HEM4	4428.51	-0.0165743	0.182999	-0.0905705	0.927834	0.995619	Intronless
YDR306C	4425.55	-0.139055	0.354903	-0.391811	0.695198	0.917549	Intronless
SEM1	4424.6	-0.423556	0.576118	-0.73519	0.462224	0.804403	Intronless
OPT1	4424.4	-0.495125	0.316732	-1.56323	0.117998	0.434739	Intronless
VPS69	4424.24	0.239336	0.357487	0.669497	0.503179	0.829253	Intronless
HRT3	4424.01	-0.108513	0.155821	-0.696393	0.486183	0.820887	Intronless
RPL22B	4424	0.526173	0.678684	0.775284	0.438172	0.787829	Spliced
NOT5	4423.74	0.167983	0.769332	0.218349	0.827157	0.966244	Intronless
FLD1	4423.59	-1.15573	0.556528	-2.07668	0.0378314	0.219818	Intronless
OLA1	4421.22	-0.275195	0.524685	-0.524496	0.599934	0.8756	Intronless
MET22	4420.96	-0.185565	0.22096	-0.839815	0.401012	0.758747	Intronless
STO1	4420.51	-0.178288	0.20282	-0.879046	0.379377	0.74461	Spliced
HXK2	4419.8	-0.797546	0.277718	-2.87178	0.00408168	0.0473132	Intronless
RSC8	4419.46	-0.0680075	0.747223	-0.0910137	0.927482	0.995619	Intronless
PFD1	4419.03	-1.12153	0.376933	-2.97541	0.00292599	0.036845	Intronless
GPM1	4418.17	-0.23666	0.275059	-0.860397	0.38957	0.750229	Intronless
ASC1_2	4417.37	-0.133521	0.475226	-0.280964	0.778738	0.947354	Unspliced
SKG1	4417.11	-0.437656	0.429436	-1.01914	0.308136	0.686438	Intronless
ELP3	4417.09	-0.399558	0.503641	-0.793339	0.42758	0.779506	Intronless
HSP31	4417.08	-0.88563	0.685976	-1.29105	0.196686	0.556645	Intronless
IRC19	4416.69	-0.620266	0.613311	-1.01134	0.311854	0.689337	Intronless
NMT1	4415.23	-0.389191	0.462121	-0.842185	0.399685	0.758066	Intronless
snR128	4414.97	0.240874	0.267339	0.901005	0.367586	0.734426	Intronless
MRS3	4412.84	0.153231	0.158643	0.965887	0.334101	0.706516	Intronless
CSM2	4412.26	-0.871967	0.70141	-1.24316	0.213808	0.581869	Intronless
HAS1	4412.03	-1.0411	0.681871	-1.52683	0.126803	0.450107	Intronless
VAC8	4411.99	-0.384403	0.212776	-1.80661	0.0708232	0.323918	Intronless
YPL067C	4411.91	-0.152062	0.523404	-0.290525	0.771414	0.945465	Intronless
MDM34	4409.98	-0.325257	0.235118	-1.38338	0.16655	0.512581	Intronless
YDL124W	4409.86	-0.818928	0.321052	-2.55076	0.0107487	0.09578	Intronless
NAT3	4409.84	-0.101851	0.425441	-0.239402	0.810794	0.959761	Intronless
MUM2	4409.7	0.0261488	0.193617	0.135054	0.892569	0.988126	Intronless
RPS9A_2	4408.75	0.247706	0.282802	0.875897	0.381086	0.74669	Unspliced
AIM17	4408.03	-0.184882	0.26266	-0.703883	0.481505	0.817966	Intronless
snR50	4407.91	-0.605005	0.659937	-0.916762	0.359268	0.727679	Intronless
TGL1	4407.16	-0.180438	0.195562	-0.922665	0.356182	0.724724	Intronless
RPL36A	4405.97	-0.907051	0.76341	-1.18816	0.234771	0.607131	Spliced
OPI1	4405.84	-0.308473	0.272663	-1.13134	0.257913	0.633936	Intronless
DFM1	4402.81	-0.284855	0.425106	-0.670081	0.502806	0.829253	Intronless
PPQ1	4402.77	-0.288122	0.438592	-0.656926	0.511229	0.832966	Intronless
YCL002C_2	4402.35	-0.153202	0.740827	-0.206798	0.836167	0.968873	Unspliced
GRE2	4401.52	0.281408	0.196637	1.4311	0.1524	0.488886	Intronless
SUN4	4401.51	-0.0157982	0.280162	-0.0563896	0.955031	0.998147	Spliced
RNH70	4400.81	-0.0485093	0.203532	-0.238337	0.81162	0.959832	Intronless
CDC73	4400.73	-0.563149	0.43514	-1.29418	0.195604	0.555003	Intronless
AKR1	4400.49	-0.25154	0.272801	-0.922062	0.356496	0.724869	Intronless
BNS1	4400.49	0.348057	0.760942	0.457403	0.647381	0.896404	Intronless
PEX12	4400.06	-0.0337543	0.305535	-0.110476	0.912032	0.990913	Intronless
CKS1	4399.9	-0.306886	0.523987	-0.585674	0.558095	0.856706	Intronless
YPT10	4395.68	0.171588	0.21463	0.799459	0.424024	0.776965	Intronless
SGS1	4395.58	-0.775394	0.824003	-0.941009	0.3467	0.717174	Intronless
GIM4_2	4394.96	0.293318	0.47384	0.619023	0.535901	0.844973	Unspliced
GIM5	4393.18	-1.17148	0.495626	-2.36364	0.0180966	0.136556	Spliced
NAT2	4392.7	0.176683	0.825691	0.213982	0.830561	0.966762	Intronless
YSC84	4392.63	-0.966854	0.31098	-3.10905	0.00187687	0.0260459	Spliced
YGL052W	4392.19	-0.57778	0.293705	-1.96721	0.0491585	0.260605	Intronless
NBL1	4392.04	-0.673474	0.488171	-1.37958	0.167715	0.515017	Spliced
SPP41	4391.5	-1.00339	0.628567	-1.59632	0.110418	0.423638	Intronless
YML131W	4391.04	-0.0473245	0.313639	-0.150889	0.880064	0.983793	Intronless
STP4	4390.62	0.268714	0.269196	0.998207	0.318179	0.695772	Intronless
FAP7	4390.46	-0.48189	0.680905	-0.707719	0.47912	0.815722	Intronless
RPS12	4390.46	0.10465	0.195672	0.534823	0.592773	0.872461	Intronless
RUP1	4390.26	-0.140876	0.213778	-0.658982	0.509907	0.832386	Intronless
ECM15	4389.93	0.358439	0.166707	2.15012	0.0315461	0.196245	Intronless
MEU1	4387.26	-1.03296	0.769981	-1.34154	0.179746	0.531787	Intronless
YPR109W	4386.98	-0.137618	0.237583	-0.57924	0.562427	0.858432	Intronless
MED4	4386.59	0.14303	0.186988	0.764915	0.444322	0.79134	Intronless
NAB3	4385.24	-0.151559	0.284106	-0.533461	0.593715	0.873168	Intronless
DET1	4384.07	-0.257487	0.514943	-0.50003	0.617054	0.883684	Intronless
OTU2	4382.31	0.430656	0.200915	2.14348	0.0320748	0.198678	Intronless
CIA1	4381.62	-0.250015	0.395924	-0.631471	0.527732	0.840678	Intronless
OCA6	4381.48	-0.244065	0.558379	-0.437096	0.662042	0.905075	Intronless
TIM10	4380.1	-1.1527	0.763437	-1.50988	0.131073	0.45524	Intronless
MCM10	4379.18	-0.556998	0.846665	-0.657873	0.51062	0.832564	Intronless
LSM2	4378.36	0.207568	0.206921	1.00313	0.315798	0.693308	Spliced
TIR2	4377.32	-0.415849	0.304057	-1.36767	0.171417	0.51951	Intronless
SDO1	4377.29	0.743036	0.152016	4.88787	1.01931e-06	4.06367e-05	Intronless
OSH3	4375.51	-0.0359907	0.170455	-0.211145	0.832774	0.967096	Intronless
GPI18	4374.15	0.00529748	0.302412	0.0175175	0.986024	0.998147	Intronless
YPL199C	4373.81	-1.03953	0.712912	-1.45815	0.144799	0.477768	Intronless
LCB4	4373.35	0.00300515	0.24566	0.0122329	0.99024	0.998147	Intronless
RPS17B_2	4373.01	-0.239164	0.521197	-0.458875	0.646324	0.896242	Unspliced
POP7	4372.99	-0.91258	0.621423	-1.46853	0.14196	0.474599	Intronless
MRN1	4372.97	0.00146896	0.305155	0.00481382	0.996159	0.998147	Intronless
HAA1	4371.52	-0.496826	0.524149	-0.947871	0.343195	0.713217	Intronless
MGM101	4371.32	-1.24479	0.731794	-1.70101	0.0889405	0.373002	Intronless
VMA10_2	4371	0.238535	0.390924	0.610183	0.541741	0.847789	Unspliced
APL4	4370.29	-0.0332816	0.351618	-0.0946528	0.924591	0.994823	Intronless
RIO2	4370.03	0.431544	0.216374	1.99444	0.0461039	0.248033	Intronless
PRO1	4369.92	0.188153	0.257254	0.731391	0.464541	0.804403	Intronless
CWH41	4369.85	-0.0161449	0.158241	-0.102027	0.918735	0.992367	Intronless
RCN1	4369.65	-0.557191	0.434275	-1.28304	0.199479	0.561129	Intronless
SDH4	4368.68	-0.410086	0.261346	-1.56913	0.116618	0.432679	Intronless
YCK1	4368.44	-0.694984	0.520159	-1.3361	0.181517	0.534781	Intronless
YDR124W	4368.37	-0.669321	0.658947	-1.01574	0.309752	0.687717	Intronless
ABD1	4368.3	-0.0449323	0.154825	-0.290213	0.771653	0.945477	Intronless
EGD1	4368.13	-0.929785	0.695054	-1.33772	0.180988	0.533452	Intronless
DSS4	4367.85	0.539732	0.132956	4.05948	4.91824e-05	0.0012947	Intronless
HSV2	4367.56	-0.0964552	0.262417	-0.367565	0.713198	0.924383	Intronless
NHA1	4367.35	-0.23216	0.191008	-1.21545	0.224195	0.594467	Intronless
PRE3_2	4367.04	0.388814	0.220137	1.76623	0.077357	0.342007	Unspliced
YNG2	4365.92	-0.0440066	0.174378	-0.252363	0.800761	0.958168	Intronless
MRH1	4365.87	0.159993	0.28926	0.553112	0.580186	0.868579	Intronless
RPA49	4365.85	-0.600242	0.68221	-0.87985	0.378941	0.744595	Intronless
PAC11	4365.41	-0.478187	0.76314	-0.626604	0.530919	0.842185	Intronless
SHO1	4364.82	0.331888	0.227293	1.46018	0.144241	0.476723	Intronless
VMA22	4364.23	-0.750177	0.580029	-1.29334	0.195892	0.55531	Intronless
SOD2	4363.78	-0.610982	0.537216	-1.13731	0.255408	0.631397	Intronless
MPD1	4363.23	-0.456075	0.446043	-1.02249	0.306548	0.685559	Intronless
RPL9B	4362.81	-0.212705	0.182005	-1.16868	0.242533	0.616341	Intronless
PRM4	4361.68	0.187632	0.472677	0.396957	0.691399	0.915865	Intronless
SUI1	4360.97	0.0780497	0.561361	0.139037	0.889421	0.987044	Intronless
YOL085W-A	4359.45	0.0728215	0.376066	0.193641	0.846457	0.973419	Intronless
NPL6	4359.22	-0.0728762	0.289501	-0.251731	0.801249	0.95858	Intronless
MTR2_2	4358.16	-0.836935	0.589752	-1.41913	0.155861	0.494014	Unspliced
AGE2	4357.21	-0.44817	0.532872	-0.841047	0.400321	0.758066	Intronless
YDR186C	4357.1	0.329527	0.203286	1.621	0.105017	0.411901	Intronless
QNS1	4356.31	-0.727951	0.311929	-2.3337	0.0196113	0.142775	Intronless
ERP3	4356.12	0.196892	0.228922	0.860083	0.389743	0.750229	Intronless
YOR052C	4355.81	-0.379227	0.452325	-0.838395	0.401809	0.75967	Intronless
SAM2	4355.62	0.598851	0.55461	1.07977	0.280245	0.658327	Intronless
PMT2	4355.29	-0.722256	0.534742	-1.35066	0.176803	0.528784	Intronless
COX17	4354.95	-0.349232	0.247028	-1.41373	0.157441	0.49691	Intronless
YLR225C	4354.94	-0.228217	0.459758	-0.496385	0.619623	0.885636	Intronless
OM14_2	4354.68	0.387842	0.47086	0.823688	0.410117	0.766551	Unspliced
FLR1	4354.36	0.0860951	0.419307	0.205327	0.837317	0.969116	Intronless
MRPL27	4354.02	-0.0652701	0.936942	-0.0696629	0.944462	0.998147	Intronless
BOS1	4353.5	-0.220116	0.405097	-0.543367	0.586877	0.870846	Spliced
TPO4	4353.14	-0.667199	0.531801	-1.2546	0.209623	0.575622	Intronless
SEC66	4353.07	-1.34636	0.648067	-2.0775	0.0377554	0.219561	Intronless
MRS2	4352.27	-0.601081	0.52286	-1.1496	0.250308	0.625272	Intronless
ARG5,6	4351.59	-1.09041	0.691871	-1.57603	0.115019	0.430899	Intronless
GRX1	4351.55	-0.0687437	0.87733	-0.0783556	0.937545	0.998147	Intronless
snR68	4349.95	0.39363	0.532286	0.739509	0.459598	0.801884	Intronless
YPR053C	4349.85	0.0236737	0.186872	0.126684	0.899191	0.989601	Intronless
GIC1	4349.54	0.103399	0.419619	0.246413	0.805363	0.959131	Intronless
RPS6B	4349.1	1.18413	0.820851	1.44257	0.149143	0.485206	Spliced
DAD2	4348.42	-0.118604	0.498815	-0.237771	0.812059	0.959929	Intronless
RPS30B_2	4346.08	-0.730323	0.236347	-3.09004	0.00200128	0.0274957	Unspliced
NUD1	4345.05	-0.225649	0.300969	-0.749743	0.45341	0.797543	Intronless
YRB1	4343.45	-0.904515	0.660361	-1.36973	0.170772	0.518403	Intronless
ALG6	4342.38	-0.259527	0.20421	-1.27088	0.203771	0.568071	Intronless
SOM1	4342.07	0.0362755	0.815503	0.0444823	0.96452	0.998147	Intronless
FTH1	4342.05	-0.538452	0.206996	-2.60127	0.00928798	0.0865664	Intronless
RPL15B	4341.74	-0.23302	0.231725	-1.00559	0.314613	0.692006	Intronless
COQ6	4341.72	-0.545337	0.156156	-3.49225	0.000478968	0.00895241	Intronless
snR87	4341.55	-0.692917	0.426134	-1.62605	0.103939	0.410202	Intronless
RFC5	4340.7	0.631004	0.182427	3.45895	0.000542292	0.00981677	Intronless
KGD2	4340.62	0.035652	0.476072	0.0748879	0.940304	0.998147	Intronless
SFB3	4339.43	-0.0407321	0.307818	-0.132325	0.894727	0.988615	Intronless
PIM1	4339.42	-0.357804	0.287993	-1.2424	0.214088	0.581927	Intronless
URA7	4339.17	-0.367075	0.53899	-0.681044	0.495844	0.827429	Intronless
FSH2	4338.73	-0.0504455	0.527688	-0.0955973	0.92384	0.994544	Intronless
FPS1	4338.41	-0.083606	0.398688	-0.209703	0.8339	0.967436	Intronless
DIN7	4338.06	-0.589495	0.764991	-0.770592	0.440949	0.790329	Intronless
RNR4	4338.05	-0.218434	0.284254	-0.768447	0.442222	0.790329	Intronless
NBL1_2	4337.86	-0.70521	0.17862	-3.94811	7.87711e-05	0.00195426	Unspliced
PIN4	4337.69	0.237555	0.275528	0.862183	0.388587	0.749697	Intronless
TCB1	4337.38	-0.656967	0.220571	-2.97848	0.0028968	0.0366716	Intronless
MDM38	4336.31	-1.17008	0.717655	-1.63042	0.103013	0.407998	Intronless
TYR1	4334.6	0.256269	0.201809	1.26986	0.204135	0.568403	Intronless
SWP1	4334.32	1.222	0.856091	1.42742	0.153459	0.489777	Intronless
YML079W	4333.66	-0.105185	0.762009	-0.138036	0.890212	0.987422	Intronless
INM2	4333.64	-0.546194	0.211642	-2.58075	0.00985865	0.0907812	Intronless
VMA4	4333.58	-0.0691516	0.188468	-0.366914	0.713683	0.924544	Intronless
YLR455W	4333.46	0.0819311	0.251003	0.326415	0.74411	0.937316	Intronless
YMR187C	4332.99	-1.10362	0.736228	-1.49902	0.13387	0.461649	Intronless
YOR093C	4332.86	-0.48648	0.759807	-0.640268	0.521998	0.839483	Intronless
BIO3	4332.08	0.0988858	0.292492	0.33808	0.735303	0.932951	Intronless
YUH1	4331.63	-0.538621	0.433322	-1.243	0.213867	0.581869	Intronless
HSP42	4331	-0.647139	0.415183	-1.55868	0.119071	0.436595	Intronless
ENP2	4330.61	0.0949202	0.409671	0.231699	0.816772	0.961331	Intronless
COQ10	4330.48	0.0433243	0.257482	0.168261	0.866378	0.9783	Intronless
YNL179C	4330.38	-0.566798	0.887052	-0.638969	0.522843	0.839483	Intronless
RPL22A_2	4329.73	-0.383859	0.508877	-0.754326	0.450653	0.795375	Unspliced
STB5	4329.66	-0.593672	0.622795	-0.953239	0.340469	0.71164	Intronless
RXT3	4329.52	-0.497508	0.404969	-1.22851	0.219256	0.587851	Intronless
RPC11	4328.82	-0.826714	0.492918	-1.67718	0.0935067	0.384795	Intronless
YOR246C	4328.74	-0.228561	0.450465	-0.507389	0.611882	0.880816	Intronless
YLR256W-A	4328.06	-0.603697	0.780235	-0.773738	0.439086	0.788639	Intronless
RPC37	4327.94	0.13031	0.334277	0.389827	0.696664	0.917665	Intronless
YFR034W-A	4327.71	-0.0117755	0.425344	-0.0276846	0.977914	0.998147	Intronless
PHS1	4327.59	-0.11494	0.992789	-0.115775	0.907831	0.990104	Intronless
YOR389W	4325.5	-0.659459	0.545014	-1.20999	0.226284	0.59682	Intronless
YBR126W-B	4324.18	-0.579126	0.492188	-1.17664	0.239341	0.612833	Intronless
TIF11	4322.98	-1.2698	0.59314	-2.14081	0.0322894	0.199404	Intronless
RGS2	4322.58	-0.500969	0.628908	-0.79657	0.425701	0.778796	Intronless
TIF35	4321.4	0.263738	0.260735	1.01152	0.311768	0.689337	Intronless
RPL11B	4321.39	-1.25274	0.740019	-1.69285	0.0904831	0.377533	Intronless
SUR7	4321.33	-0.832184	0.710024	-1.17205	0.241176	0.615616	Intronless
RPM2	4321.07	-0.360018	0.747481	-0.481642	0.63006	0.889747	Intronless
ERJ5	4320.9	-0.14554	0.313427	-0.464351	0.642396	0.894674	Intronless
PET117	4320.62	-0.517953	0.186554	-2.77642	0.00549613	0.0588615	Intronless
GSH1	4320.34	-0.156545	0.297299	-0.526556	0.598502	0.8756	Intronless
YDL241W	4320.23	-1.03719	0.391061	-2.65224	0.00799603	0.0775648	Intronless
PET309	4319.52	-0.414597	0.693673	-0.597684	0.550051	0.8529	Intronless
RUB1_2	4319.45	-0.0309888	0.774686	-0.0400017	0.968092	0.998147	Unspliced
YER187W	4319.44	-0.578869	0.297879	-1.94331	0.0519791	0.270872	Intronless
ZTA1	4316.41	0.130561	0.781279	0.167112	0.867282	0.978992	Intronless
SGO1	4316.4	-0.765942	0.754379	-1.01533	0.309949	0.687717	Intronless
FCF1	4316.32	-1.13749	0.514253	-2.21193	0.0269712	0.176994	Intronless
FCF2	4315.02	-0.587763	0.581271	-1.01117	0.311936	0.689337	Intronless
MCR1	4314.73	-0.450311	0.190252	-2.36692	0.0179366	0.136021	Spliced
VPS51	4314.61	-0.882772	0.661132	-1.33524	0.181797	0.535247	Intronless
SNC2	4314.53	-0.558794	0.605117	-0.923448	0.355774	0.724334	Intronless
YHL009W-B	4313.98	-0.35476	0.93707	-0.378584	0.704997	0.921098	Intronless
MRPL4	4313.84	0.0908752	0.277443	0.327545	0.743256	0.936983	Intronless
RPS27A	4313.59	-1.32547	0.197184	-6.72196	1.79301e-11	1.48992e-09	Spliced
TIM12	4312.63	0.605744	0.227094	2.66737	0.00764484	0.0747893	Intronless
DIC1	4312.53	-0.134976	0.284988	-0.47362	0.635771	0.893028	Intronless
GCD2	4311.47	-0.431196	0.497741	-0.866306	0.386323	0.749355	Intronless
SWM1	4311.42	0.26776	0.274496	0.97546	0.329332	0.70581	Intronless
OSH7	4311.21	-0.432757	0.443455	-0.975876	0.329126	0.705684	Intronless
PDC5	4311.06	-0.250192	0.379244	-0.659711	0.509439	0.832015	Intronless
AIM39	4310.98	-0.216695	0.306631	-0.706695	0.479756	0.815999	Intronless
YKR043C	4310.4	-0.0628851	0.723707	-0.0868929	0.930757	0.996959	Intronless
PCT1	4310.4	-0.591623	0.433243	-1.36557	0.172074	0.520523	Intronless
UTP8	4310.26	0.493482	0.323646	1.52476	0.12732	0.450783	Intronless
KEL2	4309.79	-0.783238	0.607469	-1.28935	0.197278	0.556984	Intronless
RTT10	4309.13	-0.982423	0.584557	-1.68063	0.0928352	0.382716	Intronless
AAR2	4305.73	-0.838371	0.849531	-0.986863	0.32371	0.700541	Intronless
YNL176C	4305.31	0.0316156	0.194814	0.162286	0.871081	0.979669	Intronless
MAD2	4304.33	-0.225231	0.396805	-0.567611	0.570299	0.863146	Intronless
SIW14	4303.18	-0.0974924	0.534908	-0.18226	0.855378	0.974165	Intronless
APJ1	4303.03	-0.55276	0.579446	-0.953945	0.340111	0.711479	Intronless
DBP10	4301.81	0.319222	0.304059	1.04987	0.293778	0.670701	Intronless
YBR096W	4301.5	-1.28211	0.776057	-1.65209	0.0985167	0.398516	Intronless
SDS22	4301.34	1.00731	0.809102	1.24497	0.213142	0.580443	Intronless
IZH3	4301.24	-0.418078	0.411368	-1.01631	0.309482	0.687717	Intronless
VRG4	4300.47	-0.439488	0.463422	-0.948353	0.34295	0.713091	Intronless
SPT3	4299.45	0.107889	0.231195	0.466656	0.640746	0.894037	Intronless
QCR2	4298.36	-0.399234	0.345285	-1.15625	0.24758	0.622062	Intronless
TWF1	4298.31	0.258814	0.675009	0.383423	0.701406	0.91925	Intronless
MES1	4297.36	-1.04502	0.770891	-1.3556	0.175228	0.52643	Intronless
AIM24	4297.16	-0.0983326	0.776857	-0.126578	0.899275	0.989601	Intronless
RFA3	4296.98	-1.21277	0.228608	-5.30502	1.1266e-07	5.55013e-06	Intronless
FIT3	4296.74	-0.160629	0.407955	-0.393741	0.693772	0.916481	Intronless
PLP2	4296.42	-1.00152	0.7571	-1.32283	0.185891	0.539146	Intronless
PDR16	4295.28	0.010827	0.452742	0.0239143	0.980921	0.998147	Intronless
RRN3	4294.64	-0.824162	0.47155	-1.74777	0.0805035	0.352228	Intronless
DMA1	4294.25	-0.238729	0.267464	-0.892566	0.37209	0.738271	Intronless
GLE2	4294.07	-0.056009	0.164558	-0.340361	0.733585	0.932951	Intronless
COX4_2	4293.48	-0.094401	0.606381	-0.155679	0.876286	0.98197	Unspliced
GPI17	4292.77	-0.130607	0.156049	-0.836962	0.402614	0.760508	Intronless
YDR514C	4292.21	-1.20368	0.623288	-1.93117	0.0534615	0.275372	Intronless
VID24	4292.09	0.40783	0.715584	0.569925	0.568728	0.862384	Intronless
YMR114C	4291.77	-0.401175	0.368599	-1.08838	0.276428	0.654008	Intronless
CAB1	4291.66	-0.262202	0.395705	-0.66262	0.507574	0.831333	Intronless
KAP123	4290.91	-0.370487	0.490122	-0.755908	0.449705	0.795097	Intronless
PMT4	4289.5	-0.133781	0.235003	-0.569273	0.569171	0.862384	Intronless
YLR271W	4288.55	-0.370585	0.319872	-1.15854	0.246642	0.620609	Intronless
ALB1	4284.53	0.170323	0.464763	0.366472	0.714013	0.924623	Intronless
RPL35B	4283.57	-1.28124	0.780126	-1.64235	0.100518	0.402882	Spliced
RPF1	4283.22	-0.602854	0.619025	-0.973877	0.330118	0.706429	Intronless
TMT1	4282.92	-0.186653	0.396901	-0.470277	0.638157	0.893475	Intronless
SGT1	4282.82	-0.0708096	0.23408	-0.302502	0.76227	0.94143	Intronless
RNY1	4282.44	-0.521527	0.589977	-0.883979	0.376707	0.741905	Intronless
RAD5	4282.28	-0.173506	0.659247	-0.263189	0.792405	0.954509	Intronless
NAR1	4281.77	0.575559	0.285346	2.01706	0.0436894	0.238202	Intronless
RPP2B	4280.03	0.136438	0.180833	0.754497	0.450551	0.795375	Intronless
YIL029C	4279.62	-0.306359	0.41779	-0.733285	0.463385	0.804403	Intronless
YGL242C	4279.34	-0.38397	0.717496	-0.535153	0.592544	0.872424	Intronless
SES1	4279.14	-0.00258593	0.177332	-0.0145824	0.988365	0.998147	Intronless
SLA2	4278.65	-0.209193	0.33462	-0.625166	0.531862	0.842185	Intronless
STT3	4277.86	-1.41514	0.675599	-2.09464	0.0362028	0.214695	Intronless
YFR045W_2	4276.42	-0.266127	0.158638	-1.67758	0.0934301	0.384709	Unspliced
MRS6	4276.41	-0.835701	0.629452	-1.32767	0.184289	0.537892	Intronless
SHE3	4275.39	0.143841	0.259695	0.553886	0.579657	0.868579	Intronless
COQ4	4273.95	0.30206	0.713622	0.423278	0.672093	0.909907	Intronless
NEM1	4273.77	-0.12288	0.308086	-0.39885	0.690003	0.915712	Intronless
NRG2	4272.39	-0.568321	0.415116	-1.36907	0.170979	0.518781	Intronless
RTC4	4271.76	-0.937255	0.694378	-1.34978	0.177088	0.528784	Intronless
YOR296W	4271.63	-0.590265	0.710382	-0.830912	0.406023	0.763032	Intronless
KNH1	4271.14	-0.0715919	0.424605	-0.168608	0.866105	0.9783	Intronless
TDH1	4270.3	0.953743	0.27724	3.44013	0.000581434	0.0103354	Intronless
USE1	4270.09	-0.255493	0.123793	-2.06387	0.0390298	0.222838	Intronless
TPT1	4270.04	0.00511898	0.428113	0.0119571	0.99046	0.998147	Intronless
BRL1	4269.41	-1.13287	0.642793	-1.76243	0.0779973	0.343934	Intronless
YLR041W	4269.21	-0.558051	0.569139	-0.980518	0.32683	0.703423	Intronless
CEG1	4266.61	-0.171332	0.222418	-0.770314	0.441113	0.790329	Intronless
VMA21	4265.58	0.547534	0.157092	3.48545	0.000491319	0.00908479	Intronless
SCO2	4262.99	-0.252573	0.276208	-0.91443	0.360491	0.728348	Intronless
PEP4	4262.39	-0.667777	0.170099	-3.92581	8.64389e-05	0.0021066	Intronless
AFG1	4261.88	-0.0470745	0.732311	-0.0642822	0.948746	0.998147	Intronless
AUR1	4261.62	0.0512604	0.403392	0.127073	0.898882	0.989601	Intronless
GPM2	4260.98	-0.101334	0.753293	-0.134521	0.892991	0.988279	Intronless
TSR2	4260.91	0.283102	0.496962	0.569665	0.568905	0.862384	Intronless
ATP1	4260.55	-0.131345	0.714272	-0.183886	0.854103	0.974091	Intronless
HEM3	4260.27	-0.504205	0.535869	-0.940911	0.34675	0.717174	Intronless
FLX1	4259.9	-1.15597	0.735143	-1.57244	0.115849	0.432598	Intronless
ERG12	4259.27	-0.640526	0.379364	-1.68842	0.0913303	0.379919	Intronless
SPT4	4258.39	-1.2709	0.469809	-2.70515	0.00682739	0.0688428	Intronless
APL2	4258.12	-0.183669	0.186606	-0.984258	0.324989	0.701886	Intronless
AIM46	4256.83	-0.632676	0.480865	-1.31571	0.188273	0.542858	Intronless
SCO1	4256.31	-0.412467	0.478856	-0.861358	0.389041	0.74992	Intronless
JAC1	4256.16	-0.158953	0.249642	-0.636722	0.524306	0.839565	Intronless
RTS3	4256.05	-0.611332	0.467864	-1.30664	0.191333	0.54748	Intronless
RRD1	4256.02	0.322712	0.237235	1.36031	0.173733	0.524163	Intronless
ULI1	4255.28	-0.736086	0.665927	-1.10535	0.269006	0.64736	Intronless
IMP21	4255.12	-0.203794	0.568028	-0.358775	0.719763	0.927319	Intronless
PUS4	4254.06	0.392169	0.213351	1.83814	0.0660424	0.312884	Intronless
ISN1	4253.28	-0.48391	0.165779	-2.91901	0.00351145	0.042046	Intronless
SWI1	4251.39	-0.610434	0.407331	-1.49862	0.133972	0.461772	Intronless
RPS19A	4250.99	-0.984549	0.752984	-1.30753	0.191033	0.54748	Spliced
RSC6	4250.76	0.306952	0.335703	0.914354	0.360531	0.728348	Intronless
CBF1	4249.77	-0.131835	0.214374	-0.614978	0.538569	0.846511	Intronless
YPR063C	4249.28	0.169924	0.220118	0.771964	0.440135	0.789997	Spliced
MET5	4249.07	-0.249006	0.720374	-0.345662	0.729597	0.932326	Intronless
TRA1	4247.97	-0.488626	0.731082	-0.66836	0.503904	0.829308	Intronless
YKL222C	4247.52	-0.0239875	0.975999	-0.0245774	0.980392	0.998147	Intronless
SIP18	4246.97	-0.533153	0.222222	-2.39919	0.0164312	0.12719	Intronless
YCL049C	4246.86	-0.491678	0.335646	-1.46487	0.142955	0.474934	Intronless
GLE1	4246.54	0.4902	0.243199	2.01563	0.0438384	0.238637	Intronless
YBR013C	4246.39	-0.187551	0.241106	-0.777876	0.436642	0.78694	Intronless
EMP70	4245.86	0.0546608	0.244325	0.223722	0.822974	0.963349	Intronless
SPF1	4245.48	-0.239595	0.314021	-0.76299	0.445469	0.79134	Intronless
YPS7	4245.19	-0.331327	0.490909	-0.674924	0.499724	0.828885	Intronless
YCR016W	4245.13	-0.596943	0.5974	-0.999234	0.317681	0.695772	Intronless
GLO4	4244.62	-0.25631	0.213015	-1.20325	0.228879	0.599923	Intronless
YCR101C	4243.82	-0.747004	0.930791	-0.802548	0.422236	0.775322	Intronless
PXR1	4242.84	-0.689167	0.559772	-1.23116	0.218265	0.587474	Intronless
ROG3	4242.18	0.20565	0.795709	0.258448	0.796061	0.956022	Intronless
TAX4	4241.9	-1.36657	0.555611	-2.45959	0.0139097	0.114063	Intronless
RHO5	4241.05	-0.178905	0.321088	-0.557182	0.577403	0.867266	Intronless
RRF1	4240.88	-0.217619	0.122298	-1.77941	0.0751726	0.336885	Intronless
ERO1	4239.87	0.0785797	0.831881	0.0944603	0.924744	0.994823	Intronless
NUP49	4239.42	-0.446564	0.48647	-0.917969	0.358635	0.727288	Intronless
YPR153W	4239.17	-0.645322	0.564386	-1.14341	0.25287	0.628257	Spliced
TAH1	4238.16	-0.846468	0.708064	-1.19547	0.231904	0.603086	Intronless
PCP1	4237.46	-0.353248	0.302156	-1.16909	0.242366	0.616341	Intronless
PNG1	4234.64	-0.108793	0.231478	-0.469991	0.638361	0.893475	Intronless
OMA1	4233.93	-0.378031	0.342424	-1.10399	0.2696	0.647885	Intronless
DED1	4233.27	0.0826811	0.404517	0.204394	0.838045	0.969266	Intronless
SPO73	4232.64	-0.0459223	0.265813	-0.172762	0.862839	0.977789	Intronless
CIN5	4231.74	-0.0362451	0.260736	-0.139011	0.889442	0.987044	Intronless
YAE1	4231.58	0.122642	0.457015	0.268355	0.788426	0.952325	Intronless
YOR097C	4231.57	-0.390644	0.480096	-0.813679	0.415829	0.77145	Intronless
PHO3	4230.31	-0.299282	0.326352	-0.91705	0.359116	0.727679	Intronless
GRC3	4228.36	-0.514063	0.400671	-1.283	0.199491	0.561129	Intronless
NCB2	4227.41	-0.142347	0.785914	-0.181123	0.856271	0.974378	Spliced
HSP12	4227.38	-0.0342611	0.797742	-0.0429476	0.965743	0.998147	Intronless
YML082W	4227.08	-0.022694	0.835003	-0.0271783	0.978318	0.998147	Intronless
UBP1	4226.97	0.137871	0.285951	0.482148	0.629701	0.889747	Intronless
KAP114	4226.49	-1.11857	0.818854	-1.36602	0.171932	0.520323	Intronless
MGR3	4224.72	-0.354439	0.215318	-1.64612	0.0997387	0.400914	Intronless
EAF7	4224.6	0.115561	0.422726	0.27337	0.784569	0.951231	Intronless
YMC1	4224.18	0.0749669	0.220076	0.340641	0.733374	0.932951	Intronless
VHS2	4221.32	0.0796913	0.43683	0.182431	0.855245	0.974165	Intronless
BAR1	4221.31	-0.534643	0.403643	-1.32454	0.185323	0.539146	Intronless
FMS1	4221.24	-0.754294	0.312099	-2.41684	0.0156559	0.122843	Intronless
SCW10	4221.18	0.746383	0.195846	3.81108	0.000138363	0.00318097	Intronless
POM34	4220.92	0.216223	0.179885	1.20201	0.229359	0.600375	Intronless
RPN4	4218.81	0.855964	0.595463	1.43748	0.150582	0.486625	Intronless
CPR8	4217.87	-0.588509	0.384428	-1.53087	0.125801	0.447936	Intronless
YGR035C	4217.8	-0.360489	0.328897	-1.09605	0.273055	0.651197	Intronless
YMR173W-A	4217.28	0.089098	0.813243	0.109559	0.912759	0.991074	Intronless
ISA1	4216.14	-0.836578	0.610358	-1.37064	0.170488	0.518228	Intronless
PET18	4216.01	-0.81896	0.360199	-2.27363	0.0229881	0.157917	Intronless
SPR3	4215.98	-0.722485	0.914925	-0.789666	0.429723	0.780696	Intronless
VPS15	4215.8	-0.58374	0.777656	-0.75064	0.452869	0.797202	Intronless
CIN1	4215.6	-0.187727	0.61547	-0.305015	0.760355	0.94062	Intronless
SMF1	4214.3	0.3867	0.375831	1.02892	0.303517	0.681893	Intronless
CIT1	4214.25	-0.609332	0.428487	-1.42206	0.15501	0.49313	Intronless
UTR4	4214.13	-0.706636	0.502443	-1.4064	0.159605	0.501303	Intronless
EAP1	4213.99	0.218557	0.26638	0.820469	0.411949	0.768151	Intronless
YML116W-A	4213.97	1.09924	0.778485	1.41202	0.157943	0.497186	Intronless
ABZ2	4213.95	-0.050247	0.141564	-0.354942	0.722633	0.927993	Intronless
FIP1	4213.51	-0.395982	0.342253	-1.15699	0.247278	0.621757	Intronless
YDL109C	4212.79	-0.537912	0.668467	-0.804694	0.420996	0.774649	Intronless
FAB1	4212.31	-0.782873	0.846453	-0.924887	0.355025	0.72405	Intronless
SKI8	4212.26	-0.247139	0.443218	-0.557602	0.577116	0.867183	Intronless
SRP102	4212.02	0.466945	0.22791	2.04881	0.0404807	0.228287	Intronless
HOM3	4210.54	0.526078	0.345128	1.5243	0.127434	0.450956	Intronless
RPA135	4210.47	-0.114037	0.399125	-0.285717	0.775095	0.945916	Intronless
YGL194C-A	4210.08	-0.880702	0.706909	-1.24585	0.21282	0.580165	Intronless
snR189	4209.73	-0.928148	0.387998	-2.39215	0.0167501	0.128654	Intronless
FCY1	4209.72	0.273573	0.156816	1.74455	0.0810634	0.354306	Intronless
IXR1	4208.73	-0.227174	0.436092	-0.520931	0.602415	0.876182	Intronless
EDC3	4208.53	-0.490714	0.47076	-1.04239	0.297232	0.674789	Intronless
CAF40	4207.69	-0.211504	0.190883	-1.10803	0.267849	0.646038	Intronless
YPR204W	4207.62	-0.496394	0.418707	-1.18554	0.235804	0.608975	Intronless
UTP15	4207.37	-1.10473	0.513201	-2.15262	0.0313484	0.195878	Intronless
CYS4	4205.88	-0.492081	0.487554	-1.00928	0.312838	0.690226	Intronless
SRO77	4205.75	-0.145193	0.595797	-0.243695	0.807467	0.959131	Intronless
ZRT2	4205.62	0.113973	0.193484	0.589057	0.555823	0.855057	Intronless
YMR031C	4205.12	0.565568	0.51587	1.09634	0.272931	0.651126	Intronless
COX4	4204.88	-0.181423	0.218946	-0.828621	0.407319	0.763806	Spliced
CPR3	4204.84	0.0299087	0.360305	0.0830093	0.933844	0.997788	Intronless
COF1_2	4204.05	-0.642325	0.534103	-1.20263	0.229121	0.600171	Unspliced
PET8	4203.74	-0.0291882	0.25239	-0.115647	0.907932	0.990104	Intronless
MGS1	4203.35	-0.826633	0.733644	-1.12675	0.259848	0.6362	Intronless
IES6	4202.61	-0.479898	0.399577	-1.20101	0.229746	0.600375	Intronless
SNU13	4201.42	0.01068	0.747311	0.0142913	0.988598	0.998147	Intronless
MED8	4200.34	-0.383096	0.469686	-0.815644	0.414704	0.771155	Intronless
RRP36	4199.68	-0.886489	0.319661	-2.77322	0.00555052	0.0592599	Intronless
YJL215C	4199.12	-0.412698	0.873427	-0.472504	0.636567	0.893313	Intronless
TPS3	4198.31	-0.74648	0.346697	-2.15312	0.0313093	0.195878	Intronless
ATP12	4198.16	-0.206366	0.362452	-0.56936	0.569112	0.862384	Intronless
HUT1	4196.6	0.140681	0.298096	0.471932	0.636975	0.893313	Intronless
UBA2	4196.27	-0.097314	0.146449	-0.664492	0.506376	0.831145	Intronless
GCR2	4196	0.337947	0.217376	1.55467	0.120025	0.438694	Intronless
RRS1	4195.82	-1.31164	0.299001	-4.38674	1.1506e-05	0.000352697	Intronless
YLR285C-A	4195.41	0.177806	0.704582	0.252356	0.800766	0.958168	Intronless
AAT1	4194.97	0.335717	0.610541	0.549868	0.58241	0.869696	Intronless
YJR061W	4193.41	-0.00290136	0.99658	-0.00291131	0.997677	0.998648	Intronless
YBL036C	4192.01	-1.3797	0.560955	-2.45955	0.0139111	0.114063	Intronless
YKL063C	4191.95	-1.28353	0.201037	-6.38453	1.71928e-10	1.27504e-08	Intronless
GTS1	4191.48	-0.855659	0.392411	-2.18052	0.0292192	0.18799	Intronless
DB639229	4191.2	-0.679291	0.445296	-1.52548	0.127138	0.450372	Spliced
snR30	4190.73	-0.153313	0.626881	-0.244564	0.806794	0.959131	Intronless
ADD37	4190.09	0.066835	0.149909	0.445837	0.655715	0.902132	Intronless
NSA2	4188.9	-1.15245	0.287596	-4.00717	6.14495e-05	0.00157553	Intronless
YMR158C-A	4187.63	-0.0954064	0.575208	-0.165864	0.868264	0.979157	Intronless
TAF6	4186.52	-0.563146	0.49037	-1.14841	0.250799	0.625573	Intronless
ADH1	4185.78	-0.181381	0.464931	-0.390126	0.696444	0.917549	Intronless
RAD51	4184.95	0.685629	0.462414	1.48272	0.13815	0.467909	Intronless
MNR2	4184.89	-0.51594	0.236389	-2.18259	0.0290664	0.187356	Intronless
SOK2	4183.24	0.499534	0.267237	1.86925	0.0615874	0.299978	Intronless
FMP33	4182.52	-0.933829	0.427104	-2.18642	0.0287851	0.186064	Intronless
OTU1	4182.06	-0.5472	0.460665	-1.18785	0.234893	0.607218	Intronless
YJR085C	4179.96	-0.29373	0.515255	-0.570067	0.568632	0.862384	Intronless
CAB2	4179.5	-0.296805	0.426875	-0.695297	0.486869	0.821212	Intronless
TRM1	4179.31	-0.531861	0.421864	-1.26074	0.207402	0.574006	Intronless
YPL247C	4179.06	-0.944069	0.583255	-1.61862	0.105529	0.412837	Intronless
PER33	4178.84	-1.39773	0.749748	-1.86427	0.0622839	0.301683	Intronless
YJL068C	4178.84	-0.0268194	0.676039	-0.0396713	0.968355	0.998147	Intronless
YDR042C	4178.26	-0.45242	0.566837	-0.798148	0.424784	0.777738	Intronless
YOL087C	4175.73	0.151066	0.183032	0.825351	0.409172	0.765408	Intronless
YPR015C	4174.83	1.03407	0.710598	1.45521	0.14561	0.479589	Intronless
YPR011C	4174.81	-0.156591	0.264252	-0.592583	0.55346	0.855057	Intronless
YBR071W	4174.76	-0.877587	0.651943	-1.34611	0.178267	0.529579	Intronless
YFR012W-A	4174.01	0.0406583	0.36928	0.110101	0.912329	0.990913	Intronless
YOR302W	4173.64	0.102481	0.372915	0.274812	0.783461	0.950553	Intronless
ARA1	4173.18	-0.0318449	0.337678	-0.0943055	0.924867	0.994823	Intronless
YNR014W	4172.78	-0.92938	0.548634	-1.69399	0.0902676	0.37709	Intronless
SGF29	4172.76	0.0726964	0.371751	0.195551	0.844962	0.972905	Intronless
FAL1	4172.38	-1.09467	0.249751	-4.38306	1.17026e-05	0.000357137	Intronless
YPR147C	4172.09	-0.189267	0.229652	-0.824145	0.409857	0.766274	Intronless
UTP18	4171.08	-1.353	0.594045	-2.27761	0.0227497	0.156435	Intronless
YLR363W-A	4170.62	-1.25152	0.229035	-5.46435	4.64612e-08	2.39136e-06	Intronless
HCA4	4170.47	0.149524	0.374236	0.399544	0.689493	0.915712	Intronless
YKL031W	4169.73	-0.464282	0.873296	-0.531644	0.594973	0.873649	Intronless
ORM1	4169.59	0.0324198	0.245703	0.131947	0.895026	0.988628	Intronless
RPL4B	4169.46	-0.435231	0.483629	-0.899927	0.368159	0.73478	Intronless
POL1	4167.03	-0.876001	0.497927	-1.7593	0.0785273	0.34563	Intronless
TIM8	4167.01	0.223285	0.244783	0.912176	0.361676	0.729132	Intronless
BIT61	4166.4	-0.935121	0.743879	-1.25709	0.208722	0.574444	Intronless
ARF3	4164.67	-0.547461	0.678876	-0.806424	0.419999	0.774157	Intronless
HAT2	4164.07	-0.823652	0.351991	-2.33998	0.0192848	0.141197	Intronless
SAS5	4163.65	-0.178841	0.505483	-0.353802	0.723487	0.928323	Intronless
RHR2	4163.3	-0.281956	0.831422	-0.339125	0.734516	0.932951	Intronless
snR86	4162.41	-0.42066	0.305829	-1.37547	0.168985	0.516514	Intronless
YNR025C	4161.95	-0.349531	0.757621	-0.461353	0.644545	0.895534	Intronless
YLR466C-B	4160.53	-1.10103	0.537096	-2.04998	0.0403666	0.228204	Intronless
TFC4	4160.52	-1.2411	0.786275	-1.57846	0.11446	0.429738	Intronless
MSB1	4160.36	-0.956356	0.458078	-2.08776	0.0368198	0.216569	Intronless
YGR126W	4160.02	-0.56162	0.745138	-0.753713	0.451022	0.795778	Intronless
POP2	4159.92	-0.276041	0.182561	-1.51204	0.130523	0.454696	Intronless
FOX2	4159.86	0.380709	0.516607	0.736941	0.461158	0.803996	Intronless
MGT1	4159.23	0.338325	0.283992	1.19132	0.233529	0.605735	Intronless
YDR476C	4158.15	-0.331763	0.668024	-0.496633	0.619448	0.885636	Intronless
snR66	4158.04	1.10681	0.672396	1.64607	0.0997489	0.400914	Intronless
YGR130C	4157.61	0.551702	0.511724	1.07812	0.280979	0.659346	Intronless
TIR4	4157.27	-0.102118	0.44985	-0.227004	0.82042	0.961898	Intronless
SMI1	4156.42	1.31895	0.852344	1.54743	0.121759	0.441365	Intronless
SWF1	4155.76	-1.14598	0.650777	-1.76095	0.0782471	0.344617	Intronless
YLR342W-A	4155.2	-0.157362	0.837846	-0.187817	0.85102	0.973719	Intronless
CSR2	4154.73	-0.814655	0.488533	-1.66755	0.0954042	0.390738	Intronless
PBP4	4154.22	-0.178331	0.835579	-0.213422	0.830997	0.966762	Intronless
DJP1	4154.11	-0.27214	0.16705	-1.6291	0.103293	0.408492	Intronless
SCC4	4153.93	-0.105611	0.912098	-0.115789	0.90782	0.990104	Intronless
ARO9	4153.14	-0.54708	0.522956	-1.04613	0.2955	0.672851	Intronless
CAF120	4153.01	-0.580995	0.469271	-1.23808	0.215686	0.584974	Intronless
RPB9	4152.83	-1.60658	0.21031	-7.63908	2.18774e-14	2.64716e-12	Intronless
YOR342C	4152.35	-0.0825327	0.483892	-0.17056	0.86457	0.978083	Intronless
MRPS12	4152.35	-0.0159241	0.32327	-0.0492596	0.960712	0.998147	Intronless
RHB1	4152.25	0.0128167	0.267752	0.0478677	0.961822	0.998147	Intronless
HRD1	4151.55	-0.300574	0.308191	-0.975285	0.329419	0.70581	Intronless
XKS1	4150.69	-0.792267	0.372358	-2.1277	0.033362	0.203806	Intronless
COS8	4149.82	-0.0530407	0.579722	-0.0914934	0.927101	0.995619	Intronless
UME1	4149.11	0.126354	0.336004	0.376048	0.706881	0.921923	Intronless
CCW14	4147.42	-0.234683	0.461625	-0.508383	0.611185	0.880816	Intronless
ALG5	4146.36	0.552132	0.202267	2.72972	0.00633885	0.0652523	Intronless
TOF2	4146.11	-1.2924	0.75153	-1.7197	0.0854874	0.365761	Intronless
HMI1	4145.73	-0.471004	0.692957	-0.679701	0.496694	0.827429	Intronless
PDA1	4145.43	-0.112022	0.300752	-0.372472	0.709541	0.923229	Intronless
SEN15	4145.27	0.700667	0.245837	2.85013	0.00437011	0.049737	Intronless
YDR249C	4145.26	-0.165312	0.912745	-0.181115	0.856277	0.974378	Intronless
OAC1	4144.72	0.165033	0.305334	0.540501	0.588851	0.871711	Intronless
MHT1	4144.69	0.409478	0.43029	0.951632	0.341284	0.711949	Intronless
GIC2	4143.97	-0.622868	0.589292	-1.05698	0.290522	0.66877	Intronless
DAT1	4142.39	0.0570101	0.534705	0.10662	0.915091	0.991679	Intronless
ROX3	4142	-1.15501	0.790146	-1.46177	0.143805	0.47638	Intronless
SYH1	4140.67	-0.446767	0.415053	-1.07641	0.281743	0.659824	Intronless
LYS12	4139.81	-0.205816	0.704002	-0.292351	0.770018	0.944817	Intronless
YFL019C	4139.38	-0.873288	0.816718	-1.06926	0.28495	0.663281	Intronless
AMD2	4138.88	-0.0979384	0.949295	-0.10317	0.917828	0.992367	Intronless
CYC1	4135.61	1.01474	0.793573	1.2787	0.201004	0.563318	Intronless
NUS1	4135.03	-0.46526	0.258109	-1.80258	0.0714547	0.325726	Intronless
SRB7	4134.39	-1.34773	0.551534	-2.44361	0.0145411	0.117298	Intronless
YBR259W	4133.53	-1.20885	0.798228	-1.51442	0.129919	0.454435	Intronless
DNA2	4132.66	-0.579289	0.729552	-0.794034	0.427176	0.779241	Intronless
EAR1	4131.83	0.0585828	0.372025	0.15747	0.874874	0.981451	Intronless
ECM38	4130.78	0.133274	0.664789	0.200475	0.841109	0.970544	Intronless
SPO71	4130.44	0.130996	0.931329	0.140655	0.888142	0.986524	Intronless
YBR292C	4129.88	0.327315	0.348376	0.939545	0.347451	0.717905	Intronless
VMA10	4129.75	-1.18148	0.733831	-1.61001	0.107395	0.417414	Spliced
snR190	4128.79	0.281998	0.766041	0.368124	0.712781	0.924383	Intronless
CDC8	4128.21	0.423413	0.217625	1.94561	0.0517018	0.269938	Intronless
YGR031W	4128.06	-0.0599347	0.439056	-0.136508	0.89142	0.988058	Intronless
IML2	4126.96	0.464756	0.377914	1.22979	0.218775	0.587803	Intronless
SAG1	4126.83	-0.802766	0.553627	-1.45001	0.147055	0.481595	Intronless
RIX7	4125.08	-1.02226	0.486129	-2.10286	0.0354778	0.21167	Intronless
YLR224W	4124.67	-0.253707	0.387805	-0.654212	0.512975	0.83362	Intronless
TES1	4124.53	-0.789246	0.535819	-1.47297	0.140759	0.473105	Intronless
YER034W	4123.39	0.659078	0.234657	2.80868	0.00497443	0.0541934	Intronless
NTR2	4123.03	0.00254109	0.261017	0.00973533	0.992232	0.998147	Intronless
GPI11	4122.09	0.404878	0.135561	2.98667	0.0028203	0.0359549	Intronless
YNL247W	4121.78	1.1187	0.890087	1.25684			Intronless
VPS45	4121.56	-0.333533	0.203203	-1.64138	0.100719	0.402882	Intronless
AVT3	4120.76	-0.46912	0.519616	-0.902821	0.366621	0.733353	Intronless
FEN1	4120.39	-0.966737	0.635745	-1.52064	0.128351	0.451578	Intronless
YKL027W	4120.17	-0.0140986	0.410102	-0.0343783	0.972575	0.998147	Intronless
YIL086C	4119.51	0.225238	0.182653	1.23315	0.217521	0.586795	Intronless
GON7	4119.03	-0.203434	0.515312	-0.394779	0.693006	0.916163	Intronless
YRF1-4	4118.89	-0.517576	0.406721	-1.27256	0.203175	0.567326	Intronless
HEM1	4118.48	0.034288	0.444722	0.0770998	0.938544	0.998147	Intronless
LCB1	4117.56	-0.507209	0.573232	-0.884823	0.376252	0.741855	Intronless
NTE1	4117.38	-0.800503	0.511994	-1.5635	0.117935	0.434739	Intronless
VPS35	4117.1	-0.111217	0.191598	-0.580472	0.561596	0.858239	Intronless
CDC4	4116.55	0.025455	0.337839	0.0753466	0.939939	0.998147	Intronless
RRP3	4116.21	-0.0233645	0.528087	-0.0442436	0.96471	0.998147	Intronless
CGR1	4116.06	-0.485486	0.314526	-1.54355	0.122698	0.442592	Intronless
ICL1	4115.01	0.0277696	0.490527	0.0566117	0.954855	0.998147	Intronless
TOS1	4114.99	-0.0822961	0.223944	-0.367485	0.713257	0.924383	Intronless
URA10	4114.25	-0.98527	0.503348	-1.95743	0.0502964	0.265412	Intronless
RIM21	4114.04	-0.247956	0.18347	-1.35148	0.176541	0.528474	Intronless
APM3	4112.92	-0.0308968	0.141594	-0.218207	0.827268	0.966244	Intronless
SPI1	4112.84	-0.402753	0.622238	-0.647265	0.51746	0.835422	Intronless
PRS5	4112.45	-1.12321	0.738986	-1.51994	0.128527	0.451578	Intronless
YGL193C	4110.24	0.0204402	0.265544	0.0769748	0.938644	0.998147	Intronless
ENA1	4109.62	-0.0276135	0.327409	-0.0843394	0.932787	0.997431	Intronless
NMA1	4108.89	-0.602391	0.410814	-1.46633	0.142558	0.474652	Intronless
MSH3	4108.55	-0.215559	0.691464	-0.311743	0.755236	0.93945	Intronless
MSN5	4107.9	-0.477475	0.174567	-2.7352	0.00623418	0.0645602	Intronless
YEA6	4106.99	-0.197155	0.242321	-0.813612	0.415867	0.77145	Intronless
NST1	4106.14	0.0291778	0.436239	0.0668849	0.946673	0.998147	Intronless
YPR036W-A	4104.82	-0.019127	0.737161	-0.0259468	0.9793	0.998147	Intronless
FBP26	4104.39	0.0901058	0.791759	0.113805	0.909393	0.990104	Intronless
TOS2	4103.23	0.0499137	0.385147	0.129596	0.896886	0.989436	Intronless
OGG1	4102.85	-0.93414	0.51526	-1.81295	0.0698396	0.321337	Intronless
YIR035C	4102.1	-0.403273	0.388117	-1.03905	0.298781	0.676525	Intronless
DER1	4101.78	-0.0875358	0.466111	-0.1878	0.851033	0.973719	Intronless
VMA9_3	4101.44	0.0777307	0.489105	0.158924	0.873728	0.980652	Unspliced
MPM1	4100.99	-0.148836	0.619236	-0.240354	0.810056	0.959299	Intronless
PPZ1	4100.13	0.0539314	0.23091	0.23356	0.815327	0.961085	Intronless
CFD1	4099.26	0.358769	0.207863	1.72599	0.0843498	0.362451	Intronless
MOT1	4098.17	-0.484329	0.750543	-0.645304	0.51873	0.836673	Intronless
MSC6	4098.06	-0.391913	0.213319	-1.83721	0.0661786	0.312884	Intronless
IMA2	4097.51	-1.01488	0.490435	-2.06936	0.0385128	0.221722	Intronless
NHP2	4097.18	0.728607	0.189879	3.83721	0.00012444	0.00289955	Intronless
REX4	4096.75	-0.207388	0.753029	-0.275405	0.783005	0.950553	Intronless
SPL2	4096.52	-0.153677	0.460185	-0.333947	0.73842	0.934338	Intronless
RPA190	4096.13	0.165467	0.215053	0.769424	0.441642	0.790329	Intronless
TFS1	4095.43	-0.254795	0.574447	-0.443549	0.657369	0.90221	Intronless
YHR127W	4094.5	0.356416	0.317882	1.12122	0.262194	0.640075	Intronless
YDR179W-A	4093.86	0.0299623	0.599888	0.0499464	0.960165	0.998147	Intronless
ERV14	4093.32	0.302778	0.295086	1.02607	0.30486	0.683261	Intronless
SCM4	4093.05	-0.22593	0.383637	-0.588918	0.555916	0.855057	Intronless
YCR024C-B	4091.72	-1.23754	0.257179	-4.81196	1.49455e-06	5.75863e-05	Intronless
YIL096C	4091.4	0.508926	0.287674	1.7691	0.0768764	0.341373	Intronless
SIM1	4091.25	-0.0318866	0.57101	-0.0558424	0.955467	0.998147	Spliced
ECM33	4091.1	-0.0354464	0.319162	-0.111061	0.911568	0.990794	Spliced
ART5	4090.87	-0.675822	0.470614	-1.43604	0.15099	0.486625	Intronless
GNT1	4089.98	0.153456	0.170745	0.89874	0.368791	0.735342	Intronless
ENO2	4087.5	0.315678	0.432641	0.729652	0.465603	0.804719	Intronless
MET12	4087.28	-0.819744	0.385816	-2.1247	0.0336116	0.204417	Intronless
ABP1	4086.93	-0.0983634	0.801763	-0.122684	0.902357	0.989601	Intronless
EMP24	4086.26	0.415751	0.176343	2.35763	0.0183921	0.137477	Intronless
YNL211C	4085.08	-0.276133	0.622533	-0.443563	0.657358	0.90221	Intronless
DNM1	4084.86	-0.323816	0.240339	-1.34733	0.177873	0.529064	Intronless
RPS25A	4084.78	0.707302	0.364507	1.94043	0.052327	0.272171	Spliced
SPO22	4084.55	-0.617583	0.75538	-0.817579	0.413597	0.770158	Spliced
SRP40	4084.32	-0.755536	0.647831	-1.16625	0.243512	0.617464	Intronless
RPL33A_2	4084.3	0.0456102	0.678345	0.0672375	0.946393	0.998147	Unspliced
RPS7B	4084.26	-0.483382	0.505149	-0.95691	0.338613	0.7105	Spliced
RPL23A_2	4083.44	0.964948	0.324401	2.97456	0.0029341	0.0368607	Unspliced
FYV7	4082.54	-1.09323	0.504562	-2.1667	0.0302578	0.191633	Intronless
SCS2	4081.5	0.685197	0.351636	1.9486	0.0513434	0.268676	Intronless
YPR091C	4081.27	-0.4628	0.205451	-2.2526	0.0242844	0.164367	Intronless
OLI1	4081.18	-0.336332	0.816317	-0.412012	0.680331	0.914011	Intronless
YAR009C	4080.41	0.562911	0.391621	1.43739	0.150608	0.486625	Intronless
BUD31	4080.35	-0.392055	0.671415	-0.583923	0.559272	0.857369	Intronless
ELF1	4080.29	0.0404865	0.265901	0.152262	0.87898	0.983196	Intronless
YJL181W	4079.72	-0.986202	0.753944	-1.30806	0.190854	0.54748	Intronless
PEX2	4078.69	-0.279411	0.455578	-0.613311	0.539671	0.846511	Intronless
SUB2	4078.37	0.163749	0.149137	1.09798	0.272214	0.65009	Intronless
SGT2	4078.12	-0.329175	0.495925	-0.663759	0.506845	0.831333	Intronless
RAD24	4077.87	-1.21112	0.802773	-1.50867	0.131382	0.455806	Intronless
TUP1	4077.78	-0.342493	0.490335	-0.698486	0.484873	0.820178	Intronless
ATP15	4076.45	0.290989	0.180737	1.61002	0.107394	0.417414	Intronless
MLH2	4075.76	-0.230196	1.01979	-0.225728	0.821413	0.962665	Intronless
RIF2	4075.6	-0.529262	0.852066	-0.621151	0.5345	0.843978	Intronless
TGL2	4075.2	0.225897	0.29449	0.76708	0.443034	0.790329	Intronless
YPT11	4074.86	-0.227239	0.977844	-0.232388	0.816237	0.961201	Intronless
MRD1	4074.81	0.541683	0.38705	1.39952	0.161658	0.504506	Intronless
DCI1	4072.6	0.313456	0.667961	0.469273	0.638875	0.893627	Intronless
ERP5	4072.44	-0.0681443	0.927825	-0.0734452	0.941452	0.998147	Intronless
ADE6	4072.04	-0.527272	0.450985	-1.16916	0.242341	0.616341	Intronless
YNL035C	4071.96	0.204237	0.307751	0.663644	0.506918	0.831333	Intronless
ARO1	4071.87	-0.0736052	0.365962	-0.201128	0.840598	0.970497	Intronless
MHP1	4071.03	0.488021	0.375869	1.29838	0.194157	0.553024	Intronless
YDL144C	4070.78	-0.680422	0.489635	-1.38965	0.164635	0.509645	Intronless
BMS1	4070.03	-0.0357577	0.288226	-0.124061	0.901267	0.989601	Intronless
MDM35	4069.37	0.112397	0.224947	0.499659	0.617315	0.883818	Intronless
YCR043C	4068.05	-0.809749	0.639146	-1.26692	0.205183	0.570393	Intronless
VAM3	4067.48	0.561586	0.290322	1.93436	0.0530692	0.27384	Intronless
YDR109C	4067.37	-1.32675	0.694349	-1.91078	0.0560331	0.283329	Intronless
YNR065C	4066.81	-0.240462	0.607516	-0.395811	0.692244	0.91595	Intronless
YGL072C	4066.12	-0.359894	0.485441	-0.741374	0.458467	0.800966	Intronless
CSR1	4066.05	0.446876	0.325995	1.3708	0.170436	0.518228	Intronless
MXR1	4065.98	0.764483	0.791108	0.966345	0.333872	0.706516	Intronless
RRT8	4065.91	-0.985693	0.477462	-2.06444	0.0389756	0.222807	Spliced
URC2	4064.75	-0.999999	0.757461	-1.3202	0.186769	0.539876	Intronless
NCL1	4063.59	-0.271484	0.528063	-0.514114	0.607172	0.879393	Intronless
YHR192W	4063.39	-0.242936	0.514597	-0.472089	0.636863	0.893313	Intronless
MGA2	4063.28	-0.238262	0.283189	-0.841354	0.40015	0.758066	Intronless
RPE1	4063.1	-0.377084	0.559784	-0.673623	0.500551	0.828885	Intronless
YHR097C	4062.61	0.888737	0.23372	3.80258	0.000143199	0.00328121	Spliced
YME2	4062.38	-0.646551	0.15863	-4.07585	4.58461e-05	0.00121616	Intronless
VPS70	4061.76	-0.166129	0.404435	-0.41077	0.681241	0.914109	Intronless
POL4	4061.31	-1.07428	0.849971	-1.2639	0.206264	0.572477	Intronless
OST1	4061.24	1.07315	0.891607	1.20361			Intronless
YOR105W	4061.05	0.339344	0.423559	0.801172	0.423032	0.775971	Intronless
YIL165C	4060.38	0.0368494	0.170692	0.215882	0.82908	0.966762	Intronless
EDC1	4060.19	-0.305911	0.867556	-0.352612	0.724379	0.928658	Intronless
PTC7	4058.21	-0.401626	0.387159	-1.03737	0.299566	0.677856	Spliced
PRP40	4058.09	-0.139972	0.226531	-0.617895	0.536645	0.845417	Intronless
MKS1	4057.61	0.240023	0.178991	1.34098	0.179927	0.531787	Intronless
SBP1	4057.08	-0.682099	0.373707	-1.82522	0.0679673	0.317003	Intronless
RPL26B_2	4057.04	0.251542	0.19974	1.25935	0.207905	0.574006	Unspliced
YMR103C	4057.02	1.25361	0.21594	5.80535	6.42304e-09	3.88594e-07	Intronless
YJR115W	4056.85	-0.0389574	0.741822	-0.0525158	0.958118	0.998147	Intronless
DEP1	4056.8	0.153555	0.295184	0.520201	0.602924	0.876552	Intronless
RRT1	4056.67	-1.08303	0.785023	-1.37961	0.167707	0.515017	Intronless
ORC3	4056.16	-0.829011	0.721333	-1.14928	0.250442	0.625365	Intronless
COQ3	4055.74	-0.72156	0.420727	-1.71503	0.0863398	0.368683	Intronless
FES1_2	4055.28	-0.207418	0.670972	-0.309131	0.757222	0.939611	Unspliced
OCH1	4054.97	-0.606161	0.620407	-0.977037	0.328551	0.705536	Intronless
TAF3	4054.88	0.539825	0.212663	2.53841	0.0111357	0.098465	Intronless
CSE4	4054.8	0.239127	0.210931	1.13368	0.25693	0.633178	Intronless
MGA1	4054.59	-0.823367	0.548858	-1.50015	0.133577	0.461101	Intronless
MPS3	4054.17	-1.0612	0.672261	-1.57856	0.114437	0.429738	Intronless
CIS3	4052.79	-1.42379	0.457636	-3.11119	0.00186335	0.0259627	Intronless
PAA1	4051.71	0.287507	0.269352	1.0674	0.28579	0.664788	Intronless
MAS1	4050.88	-0.725895	0.461946	-1.57138	0.116094	0.432679	Intronless
VPS60	4050.36	-1.70265	0.583702	-2.91698	0.00353438	0.0422472	Intronless
PDR10	4049.99	0.214989	0.797685	0.269516	0.787532	0.951912	Intronless
ENB1	4049.56	0.0836253	0.337759	0.247588	0.804453	0.959086	Intronless
IWR1_3	4048.76	-0.773729	0.778873	-0.993395	0.320517	0.697133	Unspliced
YEL007W	4046.48	-0.235076	0.398421	-0.59002	0.555177	0.855057	Intronless
CLU1	4044.92	0.944695	0.792274	1.19238	0.23311	0.605104	Intronless
TSR1	4044.45	0.300336	0.27662	1.08573	0.277597	0.655007	Intronless
CWP1	4043.47	-0.460231	0.384583	-1.1967	0.231423	0.602741	Intronless
YOR012W	4042.15	-0.404774	0.679089	-0.596055	0.551139	0.853627	Intronless
VTS1	4042.15	1.20336	0.207639	5.79543	6.81455e-09	4.08695e-07	Intronless
GUK1	4041.76	0.491392	0.137656	3.56972	0.00035737	0.00714429	Intronless
RPA34	4041.28	-1.03018	0.292985	-3.51617	0.000437829	0.00831875	Intronless
SPC24	4040.77	-1.04052	0.708824	-1.46795	0.142117	0.474652	Intronless
PNS1	4040.63	-0.144531	0.720787	-0.200518	0.841075	0.970544	Intronless
CHO2	4040.2	1.0821	0.748281	1.44611	0.148145	0.482645	Intronless
YOR059C	4039.91	-0.163608	0.184209	-0.888166	0.374451	0.739997	Intronless
NUP84	4039.77	0.00246831	0.229443	0.0107578	0.991417	0.998147	Intronless
SFK1	4039.35	-0.0319291	0.271227	-0.117721	0.906289	0.990104	Intronless
TFC7	4038.54	-0.0132107	0.35065	-0.037675	0.969947	0.998147	Intronless
RNR2	4038.15	-0.393395	0.260941	-1.5076	0.131658	0.456097	Intronless
VTC3	4037.92	-0.410518	0.473104	-0.867713	0.385552	0.74923	Intronless
YMR291W	4036.73	0.220566	0.288797	0.763739	0.445023	0.79134	Intronless
YMC2	4036.29	-1.08405	0.304527	-3.55979	0.000371152	0.00733477	Intronless
HIR1	4036.12	-1.24426	0.571922	-2.17557	0.0295874	0.188773	Intronless
PSD1	4035.88	-0.753731	0.346367	-2.1761	0.0295475	0.188694	Intronless
RFS1	4034.68	-0.353824	0.218076	-1.62248	0.104701	0.411901	Intronless
SSB1	4034.6	1.07345	0.864799	1.24127	0.214506	0.58269	Intronless
NSL1	4034.35	0.675781	0.220792	3.06071	0.00220813	0.0293012	Intronless
GPD1	4034.17	0.184462	0.629225	0.293158	0.769401	0.944396	Intronless
YCL048W-A	4033.13	-0.0372161	0.503734	-0.0738805	0.941105	0.998147	Intronless
YDR003W-A	4032.97	-0.189258	0.264634	-0.715169	0.474504	0.812275	Intronless
snR40	4031.14	0.225746	0.504789	0.447209	0.654724	0.90212	Intronless
ARG80	4031.09	-0.437318	0.791691	-0.552385	0.580685	0.868948	Intronless
SAP185	4030.96	-0.957416	0.458618	-2.08761	0.0368328	0.216569	Intronless
SPR6	4030.49	-0.227129	0.41926	-0.541738	0.587999	0.871386	Intronless
NFU1	4030.47	-1.66059	0.581115	-2.85759	0.00426878	0.0488255	Intronless
YLR243W	4029.84	0.133364	0.437847	0.30459	0.760679	0.940689	Intronless
GDH2	4029.48	-0.172331	0.669703	-0.257324	0.796928	0.956397	Intronless
YOR015W	4029.09	0.898078	0.823578	1.09046	0.275511	0.653335	Intronless
FMP45	4028.92	-0.97402	0.727324	-1.33918	0.180511	0.532521	Intronless
NTH2	4027.63	-0.581284	0.457753	-1.26986	0.204133	0.568403	Intronless
KIP3	4027.4	-0.980563	0.600949	-1.63169	0.102745	0.407396	Intronless
TAF14_2	4027.1	0.177586	0.58974	0.301125	0.763319	0.941623	Unspliced
SNF1	4026.99	-0.215707	0.441792	-0.488254	0.62537	0.888169	Intronless
CDC36	4026.84	-1.15853	0.819721	-1.41333	0.157559	0.49691	Intronless
KAP95	4026.56	0.376043	0.31149	1.20724	0.22734	0.5978	Intronless
PCC1	4026.26	-1.79438	0.18119	-9.90331	4.02707e-23	1.3226e-20	Spliced
UGP1	4026	-0.600219	0.486046	-1.2349	0.216867	0.586795	Intronless
SFT1_2	4025.84	1.19852	0.873041	1.37281	0.169812	0.517871	Unspliced
YHR007C-A	4024.74	0.499847	0.492921	1.01405	0.310558	0.688057	Intronless
CSN12	4024.58	0.129037	0.332193	0.388441	0.697689	0.917963	Intronless
LYS4	4024.15	0.151463	0.356093	0.425345	0.670585	0.908604	Intronless
SNF8	4024	0.137478	0.196883	0.698276	0.485005	0.820178	Intronless
YET3	4023.98	-0.0362819	0.220876	-0.164264	0.869524	0.979538	Intronless
KTI12	4022.81	0.610513	0.222717	2.74121	0.00612134	0.063968	Intronless
MSL1	4022.53	0.0588806	0.445868	0.132058	0.894938	0.988628	Intronless
REE1	4022.52	1.04113	0.241957	4.30294	1.68543e-05	0.000494657	Intronless
COG5	4021.9	0.182321	0.223943	0.81414	0.415565	0.77145	Intronless
YKL023W	4020.24	-0.432997	0.257876	-1.67909	0.0931347	0.383722	Intronless
PAN1	4019.53	0.286315	0.335059	0.854521	0.392816	0.751735	Intronless
MCM16	4018.51	0.641662	0.671693	0.95529	0.339431	0.710919	Intronless
YGR001C	4018.27	-0.2002	0.870757	-0.229915	0.818158	0.96153	Spliced
RPL36B	4018.25	0.139219	0.17901	0.777718	0.436735	0.78694	Spliced
HMF1	4017.06	0.105545	0.220095	0.479541	0.631554	0.890361	Intronless
DPH2	4016.95	-0.320473	0.544327	-0.588751	0.556029	0.855057	Intronless
BDH1	4016.56	-1.02435	0.397874	-2.57456	0.0100368	0.091931	Intronless
YJR015W	4015.82	-0.438847	0.270994	-1.6194	0.105362	0.412417	Intronless
ULP1	4015.71	-0.0736685	0.236646	-0.311302	0.755571	0.93945	Intronless
TEF4	4015.05	-0.0609182	0.403831	-0.150851	0.880094	0.983793	Spliced
YEL028W	4014.23	-1.16848	0.619837	-1.88515	0.0594102	0.293598	Intronless
GMH1	4013.72	-0.343705	0.293781	-1.16993	0.242027	0.616191	Intronless
YMD8	4013.2	0.464704	0.308123	1.50818	0.131509	0.456017	Intronless
SHY1	4013.12	-0.195654	0.37816	-0.517385	0.604887	0.878189	Intronless
SYM1	4012.34	-0.366393	0.874862	-0.418801	0.675362	0.911719	Intronless
YHL026C	4011.4	-0.319952	0.496039	-0.645015	0.518918	0.836673	Intronless
GDT1	4010.62	-1.16611	0.676478	-1.7238	0.0847448	0.363486	Intronless
MVP1	4010.43	-0.43969	0.282033	-1.559	0.118996	0.436595	Intronless
ERD2	4010.32	-0.236949	0.948466	-0.249824	0.802724	0.958681	Spliced
RPL8A	4010.06	-0.470454	0.296767	-1.58526	0.112906	0.426803	Intronless
TPK1	4009.63	-0.52751	0.68734	-0.767466	0.442804	0.790329	Intronless
YHC1	4007.81	0.110282	0.274573	0.40165	0.687941	0.915584	Intronless
YDJ1	4006.83	0.0146626	0.301965	0.0485573	0.961272	0.998147	Intronless
BCP1	4005.98	-1.59199	0.686169	-2.32012	0.0203345	0.146632	Intronless
SPT10	4005.8	-1.51371	0.856255	-1.76783	0.0770897	0.341702	Intronless
YOR008W-B	4005.26	0.736534	0.697775	1.05555	0.291175	0.66877	Intronless
CAF20	4005.04	0.427279	0.198073	2.15718	0.0309914	0.19414	Intronless
TEA1	4004	-0.00914391	0.445001	-0.0205481	0.983606	0.998147	Intronless
EDS1	4003.2	0.225683	0.786704	0.286872	0.77421	0.945916	Intronless
PET494	4002.66	-0.353438	0.445764	-0.792883	0.427846	0.779618	Intronless
LRG1	4002.1	-0.93519	0.745341	-1.25471	0.209582	0.575622	Intronless
POC4	4001.98	0.567264	0.229889	2.46756	0.0136038	0.113061	Intronless
STE23	4000.88	-0.281676	0.156452	-1.8004	0.0717971	0.326639	Intronless
GPI15	3999.82	0.615209	0.227302	2.70657	0.00679825	0.0686494	Spliced
FRE7	3999.02	-1.08522	0.625774	-1.7342	0.082883	0.358173	Intronless
IRR1	3998.36	-1.23638	0.859992	-1.43766	0.150531	0.486625	Intronless
BUD7	3997.01	0.290512	0.323415	0.898264	0.369045	0.735424	Intronless
SPT6	3996.51	-0.200361	0.267563	-0.748837	0.453955	0.797696	Intronless
HOM6	3996.28	-0.0936341	0.1834	-0.510547	0.609668	0.880816	Intronless
RNA15	3996.16	0.323885	0.236072	1.37198	0.170071	0.517871	Intronless
RRP42	3994.91	-0.506493	0.701052	-0.722476	0.470002	0.80838	Intronless
MUP3	3994.3	-0.207713	0.613769	-0.338422	0.735045	0.932951	Intronless
NOP14	3994.14	0.135725	0.517775	0.262132	0.79322	0.955104	Intronless
SMD2	3993.8	-0.368943	0.734318	-0.502429	0.615366	0.882856	Spliced
GET4	3993.48	-0.24615	0.826114	-0.297961	0.765733	0.942435	Intronless
GAS3	3992.96	-0.29463	0.504491	-0.584014	0.559211	0.857369	Intronless
MFA1	3992.2	-0.00238581	0.377823	-0.00631462	0.994962	0.998147	Intronless
RPS8A_2	3992.13	0.313106	0.204806	1.52879	0.126317	0.448929	Unspliced
YGR269W	3991.04	-0.852548	0.713808	-1.19437	0.232335	0.603773	Intronless
YIL002W-A	3990.95	0.235307	0.159171	1.47833	0.139319	0.470098	Intronless
ITR1	3990.75	-0.511395	0.319339	-1.60142	0.109284	0.421426	Intronless
STS1	3990.57	-0.235236	0.936183	-0.251271	0.801604	0.958666	Intronless
GPI12	3990.07	-0.615246	0.48748	-1.26209	0.206915	0.57359	Intronless
YIL047C-A	3989.89	0.231799	0.282536	0.820423	0.411975	0.768151	Intronless
ADE17	3989.08	0.834556	0.801505	1.04124	0.297766	0.67502	Intronless
ARA2	3988.84	-0.106287	0.503153	-0.211243	0.832698	0.967096	Intronless
NUC1	3988.14	0.536085	0.342504	1.56519	0.117537	0.43423	Intronless
STE50	3987.8	-0.543311	0.439125	-1.23726	0.215991	0.58534	Intronless
SNU23	3986.84	0.853062	0.217252	3.9266	8.61555e-05	0.0021066	Intronless
RPL27B	3986.81	-1.69028	0.190857	-8.8563	8.27172e-19	1.96724e-16	Spliced
MFA2	3986.64	-0.451785	0.526613	-0.857907	0.390944	0.750652	Intronless
SEC65	3985.26	-1.8688	0.620435	-3.01209	0.00259456	0.0335107	Intronless
TPO3	3984.36	-0.390884	0.290127	-1.34728	0.177889	0.529064	Intronless
SRN2	3984.1	0.11616	0.217029	0.535225	0.592494	0.872424	Intronless
GAT2	3983.49	-0.686691	0.483953	-1.41892	0.155922	0.494014	Intronless
MSS18	3982.12	-0.384238	0.503655	-0.762899	0.445523	0.79134	Intronless
HMX1	3982.07	0.366362	0.519411	0.705341	0.480598	0.81723	Intronless
CTF8	3981.72	0.348063	0.183829	1.89341	0.0583036	0.291304	Intronless
GCD14	3981.16	0.678988	0.260644	2.60504	0.00918649	0.0859691	Intronless
GCN5	3980.77	-0.097267	0.311574	-0.312179	0.754904	0.93945	Intronless
LEE1	3980.58	-0.00816394	0.656732	-0.0124312	0.990082	0.998147	Intronless
KRI1	3980.53	0.420296	0.851017	0.493875	0.621395	0.885987	Intronless
LSM3	3980.31	0.481067	0.173674	2.76994	0.00560664	0.0597666	Intronless
ARR1	3979.77	-0.196829	0.358822	-0.548541	0.58332	0.869696	Intronless
TFB3	3979.13	-0.0235291	0.314138	-0.0749007	0.940294	0.998147	Intronless
snR45	3979.09	1.11606	0.762347	1.46398	0.143198	0.475284	Intronless
YBR016W	3977.54	0.197076	0.331814	0.593936	0.552555	0.854861	Intronless
ROG1	3977.46	-0.493154	0.644894	-0.764706	0.444446	0.79134	Intronless
URA8	3976.88	-0.426723	0.558403	-0.764183	0.444758	0.79134	Intronless
VBA1	3976.49	-0.412639	0.167853	-2.45834	0.0139581	0.114063	Intronless
RSR1	3975.49	0.578053	0.285741	2.02299	0.0430737	0.23642	Intronless
VPH2	3975.06	-0.102678	0.476221	-0.215609	0.829292	0.966762	Intronless
YCP4	3974.92	-0.137639	0.215955	-0.637349	0.523897	0.839483	Intronless
SRX1	3974.82	-0.223432	0.772765	-0.289133	0.77248	0.945683	Intronless
YLR283W	3974.7	0.428144	0.31749	1.34853	0.177488	0.528784	Intronless
RTC2	3974.22	-0.519079	0.469922	-1.10461	0.26933	0.647463	Intronless
COX23	3973.96	-0.420082	0.196764	-2.13496	0.0327647	0.200869	Intronless
COS6	3973.72	1.14032	0.748492	1.52349	0.127637	0.45102	Intronless
SSF1	3973.6	0.739594	0.630669	1.17271	0.240911	0.615393	Intronless
BCK1	3973.22	-1.51345	0.852793	-1.7747	0.0759474	0.339035	Intronless
PDR5	3973.05	-0.685603	0.320434	-2.13961	0.0323865	0.199616	Intronless
TRP5	3972.65	-0.0452677	0.884908	-0.0511552	0.959202	0.998147	Intronless
PPG1	3971.79	-0.205413	0.168638	-1.21807	0.223197	0.593672	Intronless
ZPS1	3971.52	-1.33363	0.812892	-1.6406	0.100881	0.403113	Intronless
YNL058C	3970.26	-0.255716	0.445119	-0.57449	0.565636	0.860778	Intronless
PMP2	3970.23	0.767372	0.290565	2.64096	0.00826706	0.079857	Intronless
YGL007C-A	3969.94	0.0439428	0.340346	0.129112	0.897269	0.989436	Intronless
ATG3	3969.9	-0.768592	0.369937	-2.07763	0.0377435	0.219561	Intronless
MSC1	3969.14	-0.480417	0.550581	-0.872563	0.382901	0.747172	Intronless
EFR3	3968.8	0.101282	0.24523	0.41301	0.679599	0.914011	Intronless
YKL162C-A	3967.84	-0.891467	0.722246	-1.2343	0.217092	0.586795	Intronless
NOP53	3967.51	-0.656286	0.701363	-0.935729	0.349413	0.718944	Intronless
YPR127W	3966.25	-0.694113	0.332918	-2.08494	0.0370752	0.217623	Intronless
DLD1	3965.8	0.208675	0.686093	0.30415	0.761014	0.940689	Intronless
RPS21B_2	3965.66	0.663679	0.481338	1.37882	0.16795	0.515328	Unspliced
DCP2	3965.3	-0.0761581	0.247116	-0.308188	0.757939	0.939611	Intronless
NKP2	3964.9	-0.175177	0.903293	-0.193932	0.846229	0.973419	Intronless
SPT5	3964.27	-0.486371	0.347777	-1.39851	0.161959	0.504759	Intronless
MPC54	3963.19	-0.805079	0.89973	-0.8948	0.370894	0.73713	Intronless
YAT2	3961.69	-0.548939	0.405965	-1.35218	0.176316	0.52803	Intronless
CLB4	3961.2	-1.50689	0.691482	-2.17922	0.0293156	0.188259	Intronless
RIM101	3960.92	-0.335288	0.26276	-1.27603	0.201947	0.564812	Intronless
SLS1	3960.14	-1.18022	0.264325	-4.46505	8.00514e-06	0.000254431	Intronless
LOT5	3958.77	-0.0368209	0.468243	-0.0786363	0.937322	0.998147	Intronless
SPE4	3958.11	0.225385	0.185427	1.2155	0.224177	0.594467	Intronless
YIP5	3957.55	1.0835	0.84855	1.27689	0.201641	0.564312	Intronless
YBR012C	3957.24	-0.179244	0.594711	-0.301398	0.763111	0.941585	Intronless
RMA1	3956.61	0.00682447	0.291541	0.0234083	0.981325	0.998147	Intronless
PEP1	3956.49	-0.366504	0.163423	-2.24267	0.0249183	0.167498	Intronless
ERG20	3956.02	0.218593	0.239463	0.912846	0.361323	0.729132	Intronless
TAZ1	3955.32	-0.57512	0.325135	-1.76886	0.0769165	0.341373	Intronless
RHO3	3955.13	-1.38171	0.540581	-2.55598	0.010589	0.0952347	Intronless
GPI15_2	3954.64	0.248857	0.628274	0.396096	0.692034	0.91595	Unspliced
ECL1	3953.58	0.978708	0.635687	1.53961	0.123656	0.444016	Intronless
TRR1	3952.88	-0.176052	0.33448	-0.526345	0.598648	0.8756	Intronless
PCL10	3952.72	-0.111305	0.428874	-0.259529	0.795227	0.956019	Intronless
AVO1	3952.46	-1.1803	0.76273	-1.54746	0.121751	0.441365	Intronless
OST5	3951.95	0.46526	0.148963	3.12333	0.0017882	0.0250675	Spliced
PAR32	3951.83	-0.502756	0.685607	-0.7333	0.463376	0.804403	Intronless
DAL5	3951.81	-0.648083	0.718067	-0.902538	0.366771	0.733353	Intronless
KAP122	3951.33	-1.10232	0.738528	-1.49259	0.135544	0.464302	Intronless
PRE5	3951.33	0.055761	0.139384	0.400052	0.689118	0.915584	Intronless
MTG1	3951.1	0.053898	0.228126	0.236264	0.813228	0.960252	Intronless
MSH5	3951.03	-0.0785488	0.80065	-0.0981063	0.921848	0.993901	Intronless
REV3	3950.76	-0.438011	0.875097	-0.500529	0.616703	0.883502	Intronless
BUD22	3950.7	0.707213	0.53092	1.33205	0.182843	0.53594	Intronless
RPS26A_2	3949.71	-0.377796	0.244394	-1.54584	0.122142	0.441749	Unspliced
VTH1	3948.17	-1.03608	0.669918	-1.54658	0.121965	0.441428	Intronless
MDJ1	3947.67	-0.408967	0.635287	-0.643752	0.519736	0.836906	Intronless
ERT1	3947.52	-0.974344	0.682211	-1.42822	0.15323	0.489372	Intronless
YOL114C	3947.36	0.909144	0.750028	1.21215	0.225456	0.596354	Intronless
CCA1	3946.97	0.358794	0.267234	1.34262	0.179395	0.53171	Intronless
KAR9	3946.43	-1.38575	0.7904	-1.75322	0.0795637	0.349346	Intronless
NPY1	3945.95	-0.0474781	0.385085	-0.123293	0.901875	0.989601	Intronless
NUP60	3945.29	0.134348	0.30091	0.446472	0.655256	0.90212	Intronless
SHC1	3945.21	-0.559914	0.658706	-0.85002	0.395314	0.754395	Intronless
MUK1	3945	0.00320339	0.324933	0.00985862	0.992134	0.998147	Intronless
YBR085C-A	3944.41	0.331102	0.657587	0.50351	0.614605	0.88256	Intronless
GGA1	3943.9	-0.742203	0.440615	-1.68447	0.0920907	0.381383	Intronless
BBC1	3941.23	-0.729038	0.347137	-2.10015	0.0357161	0.212723	Intronless
MET7	3941.16	0.333557	0.271497	1.22859	0.219227	0.587851	Intronless
GYP7	3941.03	1.5268	0.177373	8.60783	7.44597e-18	1.51044e-15	Intronless
APT2	3940.92	-0.127048	0.405344	-0.313432	0.753952	0.93945	Intronless
SSA2	3940.6	-0.588862	0.423999	-1.38883	0.164886	0.509786	Intronless
ALG11	3940.37	0.135555	0.176755	0.766909	0.443136	0.790329	Intronless
TAF11	3940.04	0.348496	0.251027	1.38828	0.16505	0.509786	Intronless
FCY2	3940.02	-0.402688	0.770472	-0.522651	0.601217	0.875917	Intronless
ADY4	3938.68	-0.705482	0.724579	-0.973643	0.330234	0.706458	Intronless
HOT13	3938.64	-0.0519557	0.284696	-0.182496	0.855194	0.974165	Intronless
POP6	3938.55	0.424139	0.503091	0.843066	0.399192	0.757838	Intronless
KNS1	3938.04	0.048452	0.414259	0.116961	0.906891	0.990104	Intronless
HMO1	3936.62	0.0168335	0.190084	0.0885579	0.929433	0.996162	Intronless
TPN1	3935.97	-0.145659	0.210283	-0.692679	0.488511	0.822172	Intronless
TMS1	3935.95	-0.00256196	0.212094	-0.0120794	0.990362	0.998147	Intronless
RPL42A_2	3935.58	-0.213514	0.385806	-0.553423	0.579974	0.868579	Unspliced
RPC82	3935.46	0.62912	0.711688	0.883983	0.376706	0.741905	Intronless
INO1	3934.55	0.380753	0.608784	0.625432	0.531687	0.842185	Intronless
MSS4	3934.54	0.14442	0.285354	0.506109	0.61278	0.881127	Intronless
MLC2	3933.87	-1.39498	0.721206	-1.93423	0.0530845	0.27384	Intronless
SPS19	3933.56	0.807907	0.31317	2.57977	0.00988654	0.0907956	Intronless
PET122	3933.44	-0.837085	0.830929	-1.00741	0.313738	0.691106	Intronless
RIM9	3933.38	-1.39738	0.911507	-1.53305			Intronless
SMC5	3933.02	-0.154709	0.772665	-0.200228	0.841302	0.970544	Intronless
SEC9	3932.36	-0.581706	0.236541	-2.45922	0.0139238	0.114063	Intronless
LPD1	3930.49	-0.358655	0.532897	-0.673028	0.500929	0.828885	Intronless
MPA43	3930.24	-1.03411	0.880532	-1.17441			Intronless
CTH1	3930.2	-1.83226	0.644839	-2.84143	0.00449118	0.0504184	Intronless
COX5B_2	3929.59	-0.765375	0.596828	-1.2824	0.199701	0.561491	Unspliced
IWR1	3929.57	-0.678791	0.304589	-2.22854	0.0258443	0.1709	Spliced
CRD1	3929.22	-0.109844	0.209186	-0.525102	0.599512	0.8756	Intronless
IGO1	3929.09	0.441278	0.245027	1.80093	0.0717138	0.326475	Intronless
YOL159C-A	3929.06	0.0013223	0.269914	0.00489895	0.996091	0.998147	Intronless
MAK16	3927.76	-0.327422	0.590879	-0.554127	0.579492	0.868579	Intronless
RSC58	3927.52	0.092463	0.205009	0.451019	0.651976	0.899993	Intronless
PLB1	3926.61	-0.162222	0.727629	-0.222946	0.823578	0.963781	Intronless
FLC2	3926.27	0.938577	0.909165	1.03235			Intronless
TEC1	3925.44	-0.861249	0.506008	-1.70205	0.0887466	0.37284	Intronless
HAM1	3924.78	-1.13856	0.737678	-1.54344	0.122724	0.442592	Intronless
YOR142W-B	3924.72	0.183243	0.270673	0.676989	0.498413	0.828526	Intronless
YBL104C	3924.32	-1.15696	0.517186	-2.23702	0.0252849	0.169352	Intronless
AYT1	3923.53	-0.262027	0.399004	-0.656703	0.511372	0.833003	Intronless
IKI3	3923.34	0.0986044	0.160495	0.614378	0.538966	0.846511	Intronless
YKR047W	3923.27	-0.377331	0.570913	-0.660926	0.508659	0.831333	Intronless
APL1	3922.63	-0.146306	0.283691	-0.515724	0.606047	0.878273	Intronless
YLL059C	3922.3	-0.219394	0.70358	-0.311825	0.755174	0.93945	Intronless
ACC1	3922.14	0.812918	0.632775	1.28469	0.198901	0.560292	Intronless
RFU1	3921.7	0.232677	0.740255	0.314321	0.753277	0.939443	Intronless
GEA1	3921.19	-1.33153	0.866475	-1.53672			Intronless
UPS1	3920.06	0.890335	0.793592	1.1219	0.261903	0.639641	Intronless
CAR2	3920.06	-0.578988	0.30136	-1.92125	0.0547002	0.279044	Intronless
GIS2	3920.04	-1.78146	0.316776	-5.62372	1.86884e-08	1.02297e-06	Intronless
SEC59	3920	-1.63782	0.577119	-2.83792	0.00454083	0.0505946	Intronless
YRO2	3919.94	-0.0569201	0.647073	-0.0879655	0.929904	0.996512	Intronless
RIM13	3919.23	-0.27482	0.977943	-0.281019	0.778696	0.947354	Intronless
ALG1	3918.9	-0.668011	0.42776	-1.56165	0.118371	0.435869	Intronless
SIT4	3918.44	-0.191315	0.903852	-0.211667	0.832367	0.967096	Intronless
AEP1	3918.43	0.295184	0.23498	1.2562	0.209042	0.575094	Intronless
RPS23A_2	3917.98	1.1083	0.236581	4.68464	2.80449e-06	0.000100743	Unspliced
RPS30B	3917.73	0.360819	0.191902	1.88022	0.0600776	0.295653	Spliced
DBP7	3917.65	0.35384	0.39369	0.89878	0.36877	0.735342	Intronless
PEX25	3917.24	-0.13704	0.483937	-0.283177	0.777041	0.946697	Intronless
JEN1	3916.56	0.407644	0.78551	0.518955	0.603792	0.877445	Intronless
VAC17	3915.95	-0.460648	0.478806	-0.962077	0.336011	0.708435	Intronless
ARF2	3915.69	0.033177	0.207368	0.159991	0.872888	0.980347	Spliced
HIR2	3914.95	-0.278311	0.764316	-0.36413	0.715761	0.926192	Intronless
SSN2	3914.7	-0.274343	0.872326	-0.314496	0.753144	0.939443	Intronless
KIP1	3914.24	-0.742801	0.86534	-0.858392	0.390676	0.750652	Intronless
GPT2	3913.31	0.26972	0.655591	0.411415	0.680768	0.914011	Intronless
ATG21	3912.76	-0.277198	0.291859	-0.949765	0.342231	0.712473	Intronless
MSC7	3912.71	-0.440016	0.443848	-0.991367	0.321506	0.698403	Intronless
[truncated: 5,042 more rows]
